# Supplementary material
Source: PubMed Central journal article supplement (PMC6135593)
Supplement: cs8b01672_si_001.pdf [file cs8b01672_si_001.pdf]

# Supporting Information

## The mechanistic complexity of methane oxidation with H<sub>2</sub>O<sub>2</sub> by “single-site” Fe/ZSM-5 catalyst

Ágnes Szécsényi,<sup>†,‡,¶</sup> Guanna Li,<sup>†,‡</sup> Jorge Gascon,<sup>¶</sup> and Evgeny A. Pidko<sup>\*,‡,§</sup>

<sup>†</sup>*Catalysis Engineering Group, Chemical Engineering Department, Delft University of Technology, Van der Maasweg 9, 2629 HZ Delft, the Netherlands*

<sup>‡</sup>*Inorganic Systems Engineering Group, Chemical Engineering Department, Delft University of Technology, Van der Maasweg 9, 2629 HZ Delft, the Netherlands*

<sup>¶</sup>*King Abdullah University of Science and Technology, KAUST Catalysis Center, Advanced Catalytic Materials, Thuwal 23955, Saudi Arabia*

<sup>§</sup>*TheoMAT group, ITMO University, Lomonosova str. 9, St. Petersburg 191002, Russia*

E-mail: e.a.pidko@tudelft.nl

Phone: +31 1527 81938

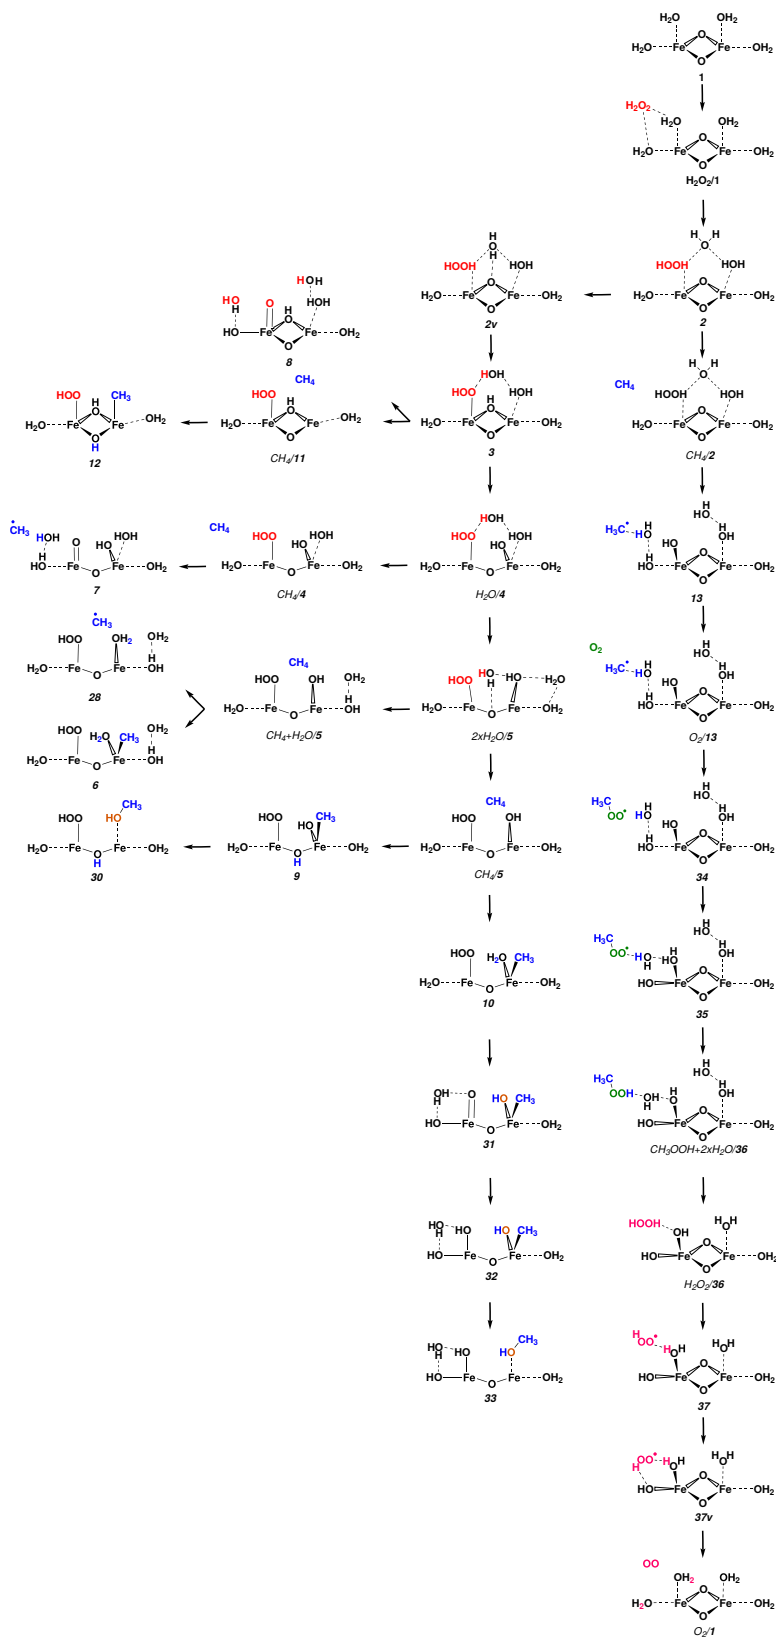

Figure S1: Schematic representation of part of the reaction network. It shows the heterolytic and the Fenton type C-H bond activation pathways as well as the MeOH formation, MeOOH formation and H<sub>2</sub>O<sub>2</sub> decomposition to O<sub>2</sub> and two [H<sup>+</sup>].

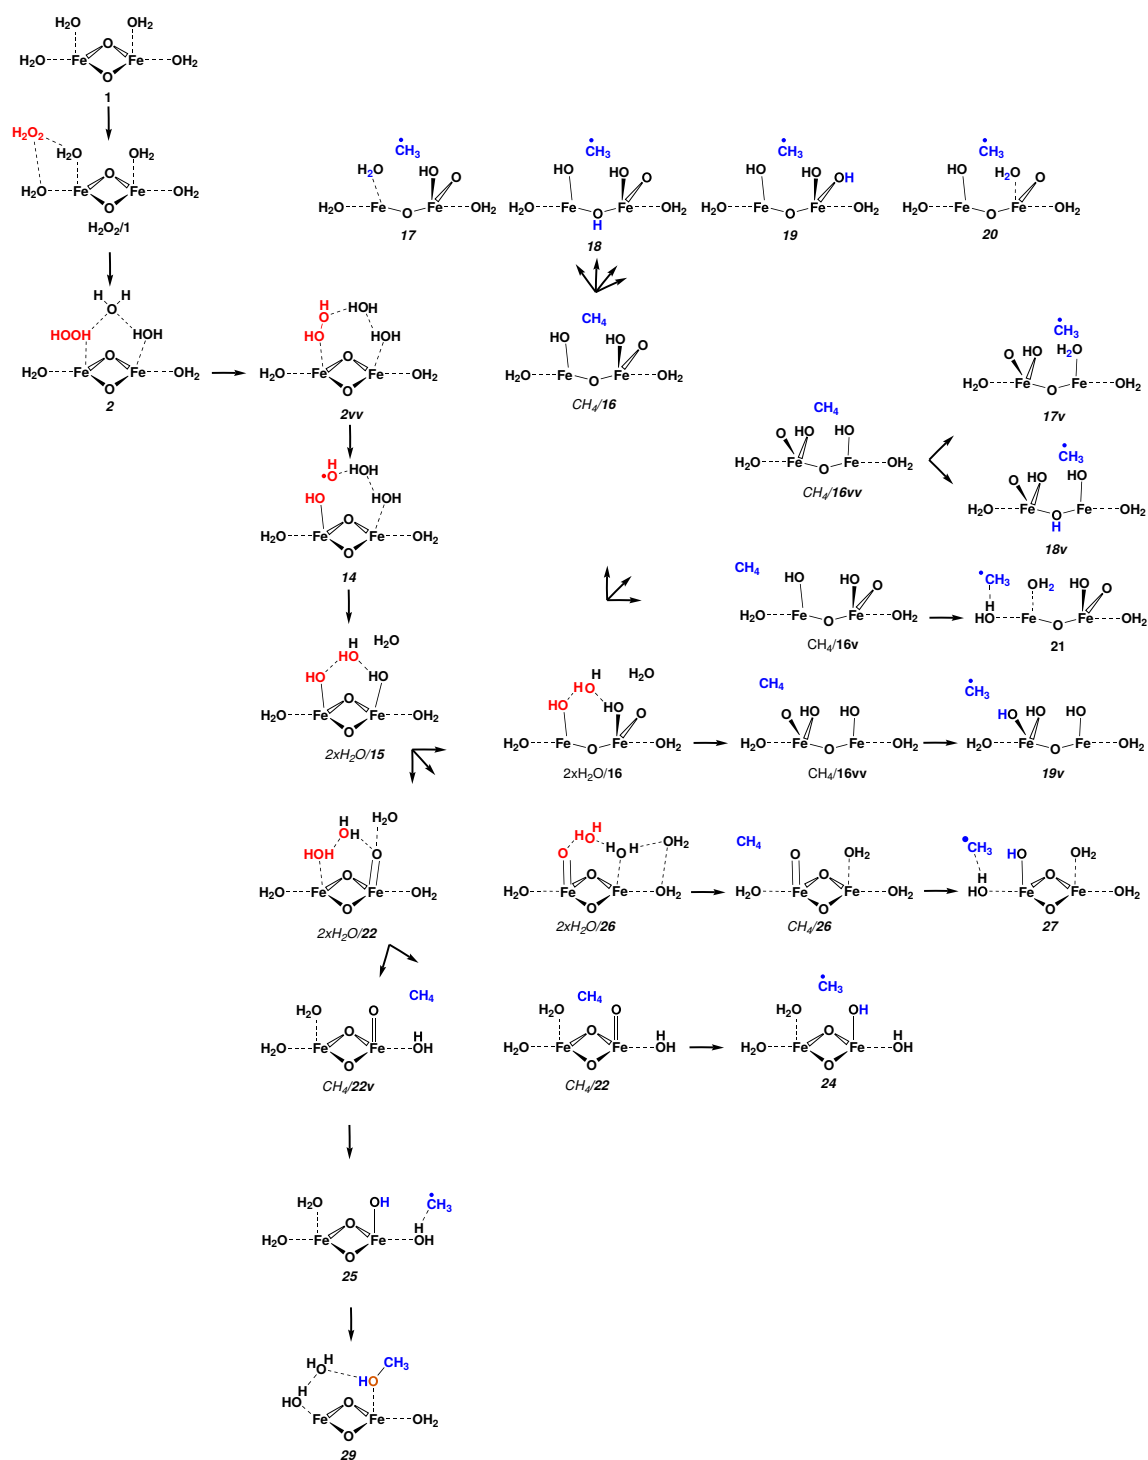

Figure S2: Schematic representation of the other part of the reaction network. It shows the homolytic C-H bond activation paths and the MeOH formation.

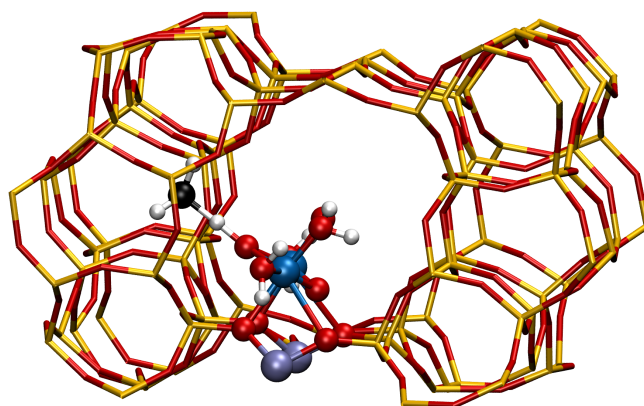

Figure S3: Transition state structure of homolytic dissociation methane over a binuclear Fe(IV)-oxo complex placed in the main channel of the zeolite.

## Free energy calculation

The addition of entropy significantly influences the thermodynamics of the adsorption and desorption steps. However it was found that the relative entropy contribution of the reaction steps between already adsorbed species is minor, also in zeolites (*ACS Catal.* **2016**, 6, 1205-1214.). Recent works successfully employ different approximation schemes allowing extrapolating the free energy contributions among varied classes of materials (*Nat. Mater.* **2016**, 16, 225-229.; *J. Phys. Chem. C* **2009**, 113, 4246). By examining the work of Bogaard and Olsbye (*ACS Catal.* **2016**, 6, 1205-1214.) we can conclude that the relative Gibbs free energy ( $\Delta G$ ) can be reasonably well approximated by correcting the relative electronic energy  $\Delta E(\text{el})$  with  $\Delta G - \Delta E(\text{el})$  of the adsorption step. To demonstrate this simplification is valid to our system we also performed frequency analysis on four C-H bond reaction steps to calculate the Gibbs free energies within the harmonic approximation. Frequency analysis of the stationary points was performed by means of the finite difference method as implemented in VASP. Small displacements (0.02 Å) were used to estimate the numerical Hessian matrix. The analysis only includes the atoms of the active site and adsorbate(s). The temperature was 50°C consistent with the experiments. The average of  $\Delta G - \Delta E(\text{el})$  of the methane adsorption step was found to be 43 kJ/mol. The corrected electronic energy was computed the following way:  $\Delta E(\text{el,corr}) = \Delta E(\text{el}) + x * 43 \text{ kJ/mol}$ , where x is the number of the previously adsorbed methane molecules (0 for the first structure and 1 for the rest). The presented results in Figure S4-S7 demonstrate, that the  $\Delta E(\text{el,corr})$  approximates  $\Delta G$  reasonably well, which means that the entropic effect is uniform for all reactions. Consequently the reaction profile changes the same way, which means that the relative electronic energy diagram is suitable to qualitatively discuss reaction mechanisms and compare reaction pathways.

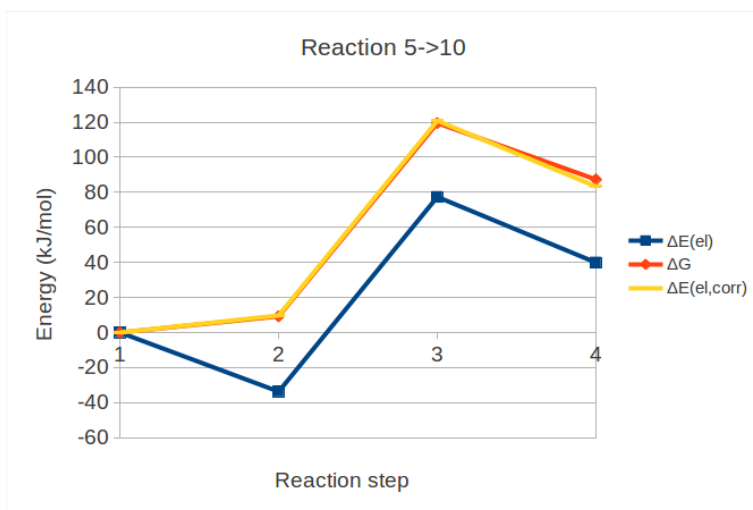

Figure S4: Reaction energy diagram of reaction  $5 \rightarrow 10$  showing the electronic ( $\Delta E(\text{el})$ ), Gibbs free ( $\Delta G$ ) and electronic +43 kJ/mol ( $\Delta E(\text{el,corr})$ ) energy. The reaction steps are: 1) active site + gas phase methane, 2) active site + adsorbed methane, 3) TS of C-H bond dissociation, 4) active site +  $\text{CH}_3$  group

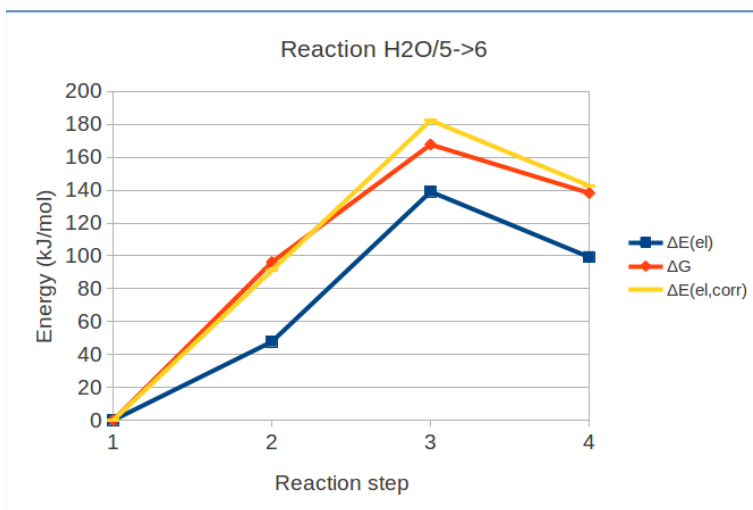

Figure S5: Reaction energy diagram of reaction  $H_2O5 \rightarrow 6$  showing the electronic ( $\Delta E(\text{el})$ ), Gibbs free ( $\Delta G$ ) and electronic +43 kJ/mol ( $\Delta E(\text{el,corr})$ ) energy. The reaction steps are: 1) active site + gas phase methane, 2) active site + adsorbed methane, 3) TS of C-H bond dissociation, 4) active site +  $\text{CH}_3$  group

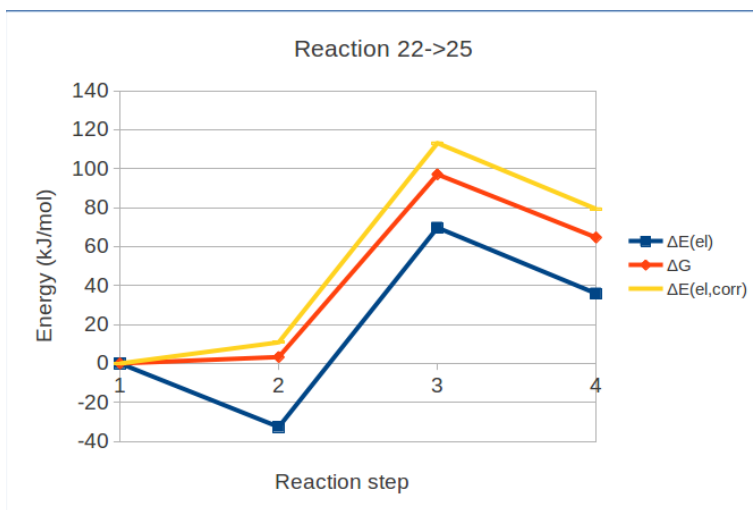

Figure S6: Reaction energy diagram of reaction  $22 \rightarrow 25$  showing the electronic ( $\Delta E(\text{el})$ ), Gibbs free ( $\Delta G$ ) and electronic +43 kJ/mol ( $\Delta E(\text{el,corr})$ ) energy. The reaction steps are: 1) active site + gas phase methane, 2) active site + adsorbed methane, 3) TS of C-H bond dissociation, 4) active site +  $\text{CH}_3$  group

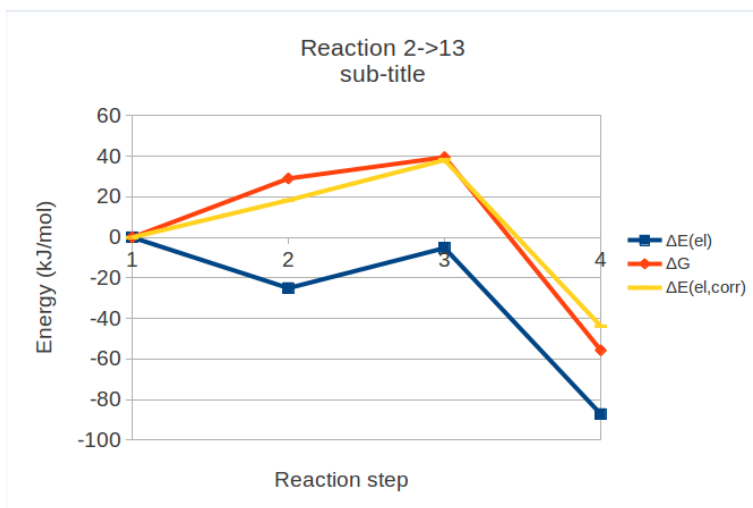

Figure S7: Reaction energy diagram of reaction  $2 \rightarrow 13$  showing the electronic ( $\Delta E(\text{el})$ ), Gibbs free ( $\Delta G$ ) and electronic +43 kJ/mol ( $\Delta E(\text{el,corr})$ ) energy. The reaction steps are: 1) active site + gas phase methane, 2) active site + adsorbed methane, 3) TS of C-H bond dissociation, 4) active site +  $\text{CH}_3$  group

In the following section we list the coordinates of all calculated stable point and transition state structures in the most stable spin state. The coordinates are in the VASP POSCAR format.

```
Structure 1 S=10/2
1.0000000000000000
20.1473052208877697 0.0000000000000000 0.0000000000000000
0.0000000000000000 19.7681594983396742 0.0000000000000000
0.0000000000000000 0.0000000000000000 13.2309279702280254
Al Fe H O Si
2 2 8 198 94
Direct
0.2765740847370931 0.5729357119822807 0.7888337268190965
0.4988062068800611 0.7285649568363824 0.8119322634524430
0.3393808366555547 0.6304122974057278 0.5915923977856168
0.4675621897387142 0.6661294162152651 0.6052403113539042
0.3295219863791869 0.5778045790385218 0.3850082707960086
0.3478322955960619 0.6548205729601428 0.3689111451633503
0.4855807194729412 0.7283973269801345 0.4211875988181158
0.4818641333924203 0.6488266153429586 0.4070132790884536
0.1950914670357914 0.6443145807206747 0.5817470386906853
0.2349905295337231 0.6412176823271831 0.4773211804986762
0.6004149607293960 0.6693660841061686 0.6671017238825658
0.5982274005350223 0.6745580006950750 0.5482528677847367
0.7036927204638906 0.4775760117025057 0.3125458222892180
0.1941539990680376 0.3241017285832378 0.8085950259751762
0.2076884743910272 0.8205686916647755 0.4009407887181350
0.6962278361903022 0.9700042096133816 0.8861388974696226
0.6945537478544886 0.3294441582325928 0.8912888436785147
0.2054086474165793 0.4812784652376950 0.3961701398214982
0.2013595875048701 0.9709213167774188 0.8099618885199724
0.7073982270578386 0.8195599881193643 0.3034253991343543
0.5910575873542149 0.4668579121439198 0.4145463802941239
0.3061755793742915 0.3373555481194865 0.9082003734880157
0.0973467012305592 0.8328734106530368 0.2953958384735291
0.8131524073478690 0.9746978841035135 0.7963020767662206
0.8080016167793100 0.3284532778518927 0.7931482209847789
0.0946384997828506 0.4660638062970189 0.2932912432893820
0.3160676483013063 0.9832947448721379 0.9049385982598995
0.5974928313352352 0.8405021870475484 0.4041832694413257
0.5953551127962238 0.5399385187972191 0.2471697144406936
0.3026205438233512 0.2686524596782363 0.7360426341863944
0.0981111722997291 0.7585033708334171 0.4628663156320928
0.7928157765641601 0.0416683581588003 0.9670824964455060
0.7967978180117262 0.2578940902690817 0.9624562159290070
0.0956513039318902 0.5395979262061857 0.4614995366816194
0.2912899809025769 0.0554888451872298 0.7394637346344417
0.5952498083526128 0.7608803845130205 0.2451870139553338
0.6042214895028968 0.4047226674779819 0.2396763344526985
0.2883733187642382 0.4040672897210890 0.7359777636852984
0.1080602398673856 0.8936006442785218 0.4727056335165777
0.8000741224004078 0.9066658198380002 0.9665906514641079
0.7989455058342735 0.3925704603164546 0.9681363976367666
0.1090187013428140 0.4047551838470846 0.4704449247959036
0.3128557542577643 0.9243688930026493 0.7245603901259450
0.6122212388306890 0.8942700064063221 0.2209766087441125
0.5256572944289496 0.4384153951493618 0.5805707838709526
0.3765176065272290 0.3564688504793182 0.0734458214530172
0.0285474971116991 0.8613754272326302 0.1306165191304988
0.8754111477584874 0.9364993512839652 0.6287969454981737
0.8733213451041401 0.3623727378449735 0.6268486286482250
0.0229199944100938 0.4400934638303548 0.1303672483525588
0.3722654559185086 0.9429690750375658 0.0770636239673042
0.5269359008484849 0.8638676285348881 0.5653306162035157
0.5211345482744519 0.3522292653242158 0.4237046435774984
0.3918302635391445 0.4405075853206476 0.9163019442411973
0.0246588163432503 0.9449058345591523 0.2901966144121056
0.8735046032510536 0.8563626322599871 0.7916638892508819
0.8724867498473219 0.4446518163019450 0.7879952525494808
0.0202174936186365 0.3553878873982820 0.2888674766499328
0.3554000141009858 0.8570966225693345 0.9249834283169511
0.5131062584865693 0.9445829497553697 0.4022236398071889
0.4591620102253586 0.4680782707477696 0.4134707670695633
0.4356967496919407 0.3152389883790411 0.9051188447295294
0.9663245209301558 0.8256248458509513 0.2989063364020940
0.9456420965021936 0.9682917898419144 0.7893875436964718
0.9402601116197717 0.3301430046753825 0.7905949497267754
0.9641053601408273 0.4756809766494452 0.3017971945281575
0.4458392406708175 0.9554720528444014 0.9155313542867790
0.4682058027647746 0.8191206494296421 0.3974924691066704
0.4877041827973602 0.5116127362682850 0.7360529229962303
0.4212570854037595 0.2744929800963478 0.2154388213900886
```



0.9857172966593052 0.7737625496754739 0.9946957433750201  
0.9157107204067267 0.0256303335633583 0.4938294338294651  
0.9141455818404837 0.2747253780327078 0.4899918932929813  
0.9780454143162440 0.5272190520963093 0.9940130953046835  
0.4146697355691589 0.0213253028439187 0.2210367581025440  
0.4920001301348464 0.7674838392594246 0.6919436909019734  
0.3994372262602217 0.4323649407927018 0.6372261481043648  
0.5034048626774738 0.3618938325950205 0.1282061443783495  
0.9016615495387147 0.8630123370721429 0.0778562278703460  
0.0017661756854487 0.9366215137790553 0.5714366451948149  
0.9992467336024070 0.3651274639499206 0.5657330767929579  
0.8951440810979241 0.4409768285738452 0.0834884414007680  
0.4995006460590347 0.9346862833878503 0.1345812670482718  
0.4020990121341356 0.8591415243766204 0.6212158255719312  
0.4935043290598058 0.3796391753758812 0.7505431474007873  
0.4083702648554962 0.4053138109459401 0.2526090913000280  
0.9942875997129649 0.9027771800522472 0.9479167871631194  
0.9068163324251930 0.8966521288170797 0.4443304032174837  
0.9018174462606714 0.4044710283330966 0.4435603097415219  
0.9847849353008593 0.3971794903991727 0.9504327258737612  
0.4041375146337026 0.8884276309347243 0.2523053801815112  
0.4949846606537155 0.8939825411101431 0.7541070102514461  
0.3118657529253797 0.5314283380657633 0.6829985180418819  
0.5914147608630397 0.27329275217849557 0.2018065224772144  
0.8168338728099841 0.7745092274805492 0.0028246292245643  
0.0896962499281856 0.0253902913919359 0.5020160842125374  
0.0879941947889548 0.2744595324949962 0.5030787289975933  
0.8070705174569638 0.5247901419439871 0.0024123506937766  
0.5849459612397103 0.0247854460688778 0.2050760055489496  
0.3094791860775477 0.7904956652150559 0.7266696524220859  
0.2827560086706545 0.4395368608451067 0.5458647401120188  
0.6272713020736485 0.3593469221443960 0.0573703624588034  
0.7771944639900078 0.8599244411804187 0.1459629293952429  
0.1229290039411914 0.9440436345843678 0.6531285047783695  
0.1175104094137010 0.3570086372446450 0.6541007585710616  
0.7691425093427722 0.4403505550218988 0.1469250864518694  
0.6167117757964548 0.9535160550445769 0.0439334695360529  
0.2755319248333400 0.8575521870406517 0.5626995322084348  
0.3318486307122192 0.4822453106068821 0.3705227788858443  
0.5659684334325764 0.3200974867011369 0.8916949015820176  
0.8362638959068174 0.8233414716909508 0.3152942429779582  
0.0736733187441557 0.9745554827459858 0.8320275711082363  
0.0674538461438241 0.3275699422859291 0.8340117480420426  
0.833225935967116 0.4758346487575852 0.3109564581747263  
0.5691011508045034 0.9786893946688902 0.8601843680607143  
0.3364156002849433 0.8231167761516406 0.3928598832843977  
0.2700568206407087 0.3629615585798727 0.3828462495011547  
0.6216361152794823 0.4422720156692503 0.8983643895334368  
0.7687443067622122 0.9384641583916463 0.3098341543734282  
0.1352842696252931 0.8561671575037783 0.8058485127236528  
0.1332281327632609 0.4429782114545415 0.8082164227616447  
0.7663553532172462 0.3596541074898315 0.3095288689652198  
0.6221776633320327 0.8590585604676869 0.8999450130682048  
0.2711090820277750 0.9396378198978333 0.4028054186298521  
0.4192052977536858 0.5417202279088618 0.2617652317941229  
0.4982062265816149 0.2462828673517572 0.7649163080830889  
0.9087280302154414 0.7610158741505741 0.4467587937727701  
0.9874168380026792 0.0383273348429898 0.9445451596690763  
0.9838164952742868 0.2618254871000720 0.9467368639078522  
0.9015517217405427 0.5407994232698135 0.4446223432767117  
0.4701534409518326 0.0276384717143398 0.7535185557834476  
0.4041764964760919 0.7513186696941180 0.2635991444095011  
0.7006754678147626 0.2433109344493674 0.3093550867694574  
0.1918676111638573 0.5652988320691774 0.7929893554297255  
0.1945989723645597 0.0479270879306375 0.3825465949314214  
0.7032941930222594 0.7548802922323675 0.9041580874770129  
0.6973417619324898 0.5525269960173783 0.8952080390282284  
0.2018894036141703 0.2494164742835689 0.4047148403652627  
0.1988291647963925 0.7369302047391013 0.7998359734726921  
0.6960693251144059 0.0497960820127191 0.3111013849910494  
0.5848096749008440 0.2370623692832376 0.3963030716778184  
0.3110516923008627 0.5482438879084296 0.9023719284534657  
0.0758059565819219 0.0673941443638356 0.3103045658280988  
0.8161131203168946 0.7359100580597203 0.8099364913243655  
0.8119772898678058 0.5633920431138409 0.8086088451163336  
0.0884891566609175 0.2409678524312209 0.3076948887120333  
0.3084985777499231 0.7339097113219043 0.9076964027069563  
0.5813438113246876 0.0599092981060949 0.3999946079689133  
0.6145726051851357 0.1483147928750372 0.2544686429934280  
0.2981678150623221 0.6557493066693669 0.7446636340234860  
0.1195313915295613 0.1504198209431571 0.4511064535981407  
0.7800152814969066 0.6504005561411909 0.9546871370938658  
0.5247755132512196 0.2593123296938096 0.5686857556955787  
0.3800489316507110 0.5232454396881043 0.0715923475047593  
0.0175077956218008 0.0315409468398868 0.1385451267774291  
0.8777762770225448 0.7701602795977354 0.6405510948952147  
0.8741102947585393 0.5321463480562425 0.6386632242912331  
0.0207529113275643 0.2668484657360194 0.1389369929070572  
0.3757656869815538 0.7693554108465963 0.0711101397742895  
0.5126095162862564 0.0221270093088214 0.5645632259327981  
0.4526465385426755 0.2381983598007609 0.4030119465662303  
0.4421386749547097 0.5636624756469716 0.9082850403997708

0.9453272602819009 0.0525128981067956 0.3019135520839910  
0.9478399007312862 0.7462157092033952 0.8053095570549310  
0.9430098067949413 0.5577441158759530 0.8042411025899810  
0.9565566741742492 0.2388554518368782 0.3068463354133072  
0.4398885851485294 0.7544096312823052 0.8969785373802790  
0.4498493300435160 0.0626694831425765 0.4027347241223821  
0.4991938696987960 0.1398358250523149 0.6515901474050177  
0.3952077176129417 0.6462849257043569 0.1474798931827506  
0.9986652045565617 0.1498870734451743 0.0499359971036431  
0.8895544327111989 0.6514554674910615 0.5529777823376334  
0.4035541060622473 0.2316015474646455 0.6243853721362381  
0.5014133444951820 0.5688791625183016 0.1131722584098581  
0.8967338203296075 0.0675962919778336 0.0831194007219744  
0.9970238124600709 0.7276236092326647 0.5851913189602792  
0.9936241043546921 0.5723550656850880 0.5789978227658860  
0.8972229597344054 0.2326136462221845 0.0896992634823018  
0.4974360639743260 0.7297181338558958 0.1226625649576426  
0.3911696319673816 0.0689996653527997 0.6077629162466459  
0.2928205650374597 0.1597695553931820 0.6161963554311605  
0.6045625882651883 0.6503714191592849 0.1343861396301766  
0.7926787297820678 0.1506568761650093 0.0824508253336003  
0.1029841610570989 0.6479622369115619 0.5774769974201384  
0.2960343416895275 0.2825150039799570 0.5374616875602765  
0.6186669586245238 0.5285701199801855 0.0506541222265265  
0.7846418761300012 0.0290894779536586 0.1661874414946144  
0.1108611996988396 0.7698651570638949 0.6605250120630021  
0.1024369723004844 0.5245670112393562 0.6603494809513979  
0.7823812829497239 0.2741715025430234 0.1593191218966465  
0.6131669202850553 0.7714716933403585 0.0480745368064445  
0.2726872230964828 0.0366805381100906 0.5419538070747778  
0.3261714862098775 0.2442070031971584 0.3490662585410135  
0.5702566270752901 0.5654197510075604 0.8689727871384800  
0.8208502018418429 0.0570165141605714 0.3583149903949687  
0.0742575884364958 0.7412337330415308 0.8513019928326503  
0.0688314868132452 0.5548503432743698 0.8519752219507581  
0.8278603252116457 0.2428188041729096 0.3441250975565376  
0.5785256135721902 0.7345830963489379 0.8589263547535930  
0.3225515191883304 0.0588127133631837 0.3560346025917212  
0.4018928700381469 0.1494394067547274 0.2709520806623643  
0.4877407435976940 0.6444226589288402 0.7647867229836955  
0.9033749619578489 0.1491172422844846 0.4293349947460387  
0.9917764372813800 0.6503225342046420 0.9287947815182139  
0.4227026178530407 0.5861889363850267 0.5784067061671540  
0.3851307145122575 0.7114017477472531 0.5859613016897322  
0.3239990607560516 0.6236424132374508 0.4129995676954249  
0.5009167602325384 0.6845455261834603 0.4487368620088226  
0.2393945581839151 0.6419337401471900 0.5507614243929366  
0.5768380884204984 0.6540954391597541 0.6068125209079552  
0.6237129088377434 0.4722288415041940 0.3024086258965316  
0.2733583563204132 0.3339782078751450 0.7959469887870968  
0.1276083871714949 0.8265496810968069 0.4090866513121270  
0.7752586253572797 0.9730184211956011 0.9051738534362666  
0.7742554828277313 0.3269848587919764 0.9049655707748706  
0.1255999351537278 0.4725292026055900 0.4064642105802057  
0.2800921722595739 0.9827134568881150 0.7946538191880769  
0.6280817653463330 0.8292152864558043 0.2913635597416270  
0.5244775921258653 0.4309063639275229 0.4593381590154746  
0.3774672634564648 0.3629908587857684 0.9510233502973363  
0.0290924775319296 0.8665693522891875 0.2527289269965582  
0.8768302104669565 0.9340534290451318 0.7512939264028887  
0.8734922243154829 0.3665636314048764 0.7491283846414233  
0.0252299667559871 0.4338786229967775 0.2523456751402796  
0.3723765740205508 0.9344736283805498 0.9550494649902337  
0.5264432785863598 0.8684317705112825 0.4440477708124427  
0.4752947395183507 0.4419065681009425 0.6765290129210563  
0.4275618191809259 0.3494669549139989 0.1672844288402372  
0.9771826461054279 0.8500731160111067 0.0374763768313443  
0.9254683108888998 0.9488512639413151 0.5344158393328841  
0.9227160503808592 0.3514783444903003 0.5313157493286869  
0.9701240684455571 0.4514377726237288 0.0390169482425776  
0.4233043019258476 0.9471237301672050 0.1712424022067134  
0.4778146792582330 0.8449552837210696 0.6593783981091704  
0.3218199428218692 0.4531020204770634 0.6513970437051197  
0.5812498404488802 0.3495919166273888 0.1565143225913117  
0.8241177218667410 0.8507360771599216 0.0476774124046442  
0.0802540668113234 0.9503396045731173 0.5501267434233904  
0.0779258050299942 0.3501753153563282 0.5488315871496027  
0.8176945098519238 0.4498910264951994 0.0502182299401743  
0.5778431038680638 0.9516167663870146 0.1505895759634849  
0.3254443983646840 0.8561671582465817 0.6592189663155770  
0.2722022085507910 0.4398704637769261 0.4255317775969635  
0.6272661719897002 0.3636997051178848 0.9346443425889793  
0.7727403128636608 0.8613566772822829 0.2681569361188309  
0.1331075829124546 0.9356159007561338 0.7742017523463599  
0.1276775394529262 0.3643576927627307 0.7753676575991771  
0.7681364633557636 0.4374496395467239 0.2696356889647651  
0.6259704921381111 0.9391816392661720 0.9237508821440030  
0.2726985951130818 0.8614251408705013 0.4405834942585102  
0.4059056592914391 0.4717915046619319 0.3229892829238175  
0.4979629116317413 0.3166717354436508 0.8275098487645469  
0.9048073252261226 0.8279794248476330 0.3774628476643495  
0.0001194414400920 0.9703986180359148 0.8795026327910654

0.9941262073587601 0.3301015542065387 0.8815927234846078  
 0.9005136874419249 0.4730422498215349 0.3764712943152490  
 0.4948586087519088 0.9633401871859536 0.8193784865130780  
 0.4023355649957178 0.8229623042968784 0.3245772612564874  
 0.6231558704442852 0.2263680516709606 0.2897748109272463  
 0.1203371210828052 0.0724934691641475 0.4124502699953673  
 0.7782600370654018 0.7289640699356938 0.9185372344225678  
 0.7739082966042671 0.5726467127728626 0.9161468183414579  
 0.1245826228356191 0.2291181894845364 0.4167146350591642  
 0.2790696814748659 0.7291737040387507 0.7931177041645091  
 0.6195825152733651 0.0704911134934800 0.2922894020426262  
 0.5204221863864856 0.2717479035811923 0.4477242643542761  
 0.3785686190530743 0.5195285110239306 0.9473475947712160  
 0.0159176972516801 0.0241105913985132 0.2606233972532813  
 0.8786382338511433 0.7768926335626456 0.7628998033884058  
 0.8753843929598398 0.5244725794948024 0.7607797737925585  
 0.0219711982936988 0.2753723663873154 0.2609933848605039  
 0.3719307397234903 0.7778165836554026 0.9479009163342005  
 0.5150354359367189 0.0228518381011922 0.4419692285409312  
 0.4807793442033502 0.2194107750494377 0.6528115746541199  
 0.4241357848235631 0.5697626820908094 0.1462505904848949  
 0.9745777226536129 0.0719954904310256 0.0537484708758229  
 0.9187053469198337 0.7275962103203789 0.5563694726387435  
 0.9150601253830405 0.5739286809212105 0.5537125741385562  
 0.9746655798821671 0.2277827887485446 0.0564272502416136  
 0.4190529852912357 0.7245771336330606 0.1486605174729316  
 0.4677593759712781 0.0647958833502857 0.6450823855409618  
 0.3235994570206529 0.2353880562057415 0.6291002440037120  
 0.5802038912819476 0.5721068263918974 0.1364543077237275  
 0.8168395997747886 0.0724127382139739 0.0744112177857435  
 0.0764325460855518 0.7266770670130616 0.5711723546319887  
 0.0731959809325316 0.5702594260003123 0.5701694140832939  
 0.8176194463773728 0.2285475006370042 0.0725676559149416  
 0.5774795292437729 0.7278745791284637 0.1357600623577554  
 0.3123948136935975 0.0802624191838376 0.6269861290858811  
 0.2735820671920889 0.2842808862041214 0.4193917275479105  
 0.6261647844303689 0.5219769729425972 0.9281058310481236  
 0.768182500020331 0.0188932016071063 0.2854691255684119  
 0.1299252704150444 0.7761184163134488 0.7801794565032627  
 0.1258524059563088 0.5227820673825919 0.7796090217223853  
 0.7698021662388724 0.2799453656968658 0.2805386772029237  
 0.6276668210903305 0.7788598874381487 0.9264801312478746  
 0.2659107389262444 0.0207155645633817 0.4216716024099768  
 0.4006507966079048 0.2271709380670364 0.3102773156130513  
 0.4964714673984193 0.5705868359765232 0.8187122711301245  
 0.8963021670911281 0.0706927738379776 0.3956776179297956  
 0.0001582114713244 0.7283722346057633 0.8948730828464074  
 0.9959868269941713 0.5717823802930548 0.8945363410454917  
 0.9001190439360374 0.2271552613034096 0.3924497971272788  
 0.3964535477953409 0.07243399311542463 0.3122209156439233  
 Structure H2O2/1 S=10/2  
 1.000000000000000  
 20.1473052208877697 0.0000000000000000 0.0000000000000000  
 0.0000000000000000 19.7681594983396742 0.0000000000000000  
 0.0000000000000000 0.0000000000000000 13.2309279702280254  
 Al Fe H O Si  
 2 2 10 200 94  
 Direct  
 0.2752769255942426 0.5725294074007468 0.7876722120504944  
 0.4985786590809706 0.7281693324637267 0.8126334548134511  
 0.3380024534229509 0.6313026033017557 0.5917608377290060  
 0.4668588330426126 0.6656884449064311 0.6055254210541051  
 0.3417050237540274 0.5796159779687742 0.3888690308992999  
 0.3561011006709520 0.6578491515566777 0.3770995543843729  
 0.4863877000583611 0.7288884890387001 0.4209195802577998  
 0.4871404078689726 0.6491364366809877 0.4045670272878375  
 0.1965842446041937 0.6430880135350401 0.5894570284928070  
 0.2252125374751267 0.6405681254509479 0.4791472797503726  
 0.5994044430506503 0.6682001133168458 0.6677944289725554  
 0.5971662260449011 0.6753980273780918 0.5492018273477224  
 0.2495161205055013 0.6244046262305665 0.3192531023748376  
 0.1696523294978810 0.5575718121137225 0.2261336345452101  
 0.7043421118988037 0.4782644992279870 0.3116090564668541  
 0.1940777171853853 0.3242976490462566 0.8084601474291364  
 0.2082494571484701 0.8207969936420622 0.4012368124499201  
 0.6962916527068331 0.9691828308900206 0.8860239655626635  
 0.6940810967177565 0.3282217361990866 0.8910298441545335  
 0.2062417647754594 0.4796047177093363 0.3948033210045029  
 0.2015489048322463 0.9704904591604034 0.8100317407566612  
 0.7076779887997341 0.8196141296257627 0.3039821020148286  
 0.5928603046881883 0.4657469214941489 0.4158375308108225  
 0.3057218836987175 0.3376190543818495 0.9091488929699414  
 0.0975933735721141 0.8324902375398611 0.2962044306794290  
 0.8131948707131027 0.9743848667196814 0.7960890690350018  
 0.8071935439201509 0.3299418529261454 0.7916386897136902  
 0.0957388522134879 0.4677979477937113 0.2923987123029417  
 0.3160420987640490 0.9829609796967195 0.9056901331463751  
 0.5978482173223958 0.8403193512328641 0.4047301557129540  
 0.5942923157176717 0.5390828248985291 0.2482137886015934  
 0.3030817168121230 0.2693434075505129 0.7365431174506621  
 0.0992461226430894 0.7573172943671490 0.4636271923756303  
 0.7923599566319638 0.0420346756403088 0.9662429736503524

0.7981659058272824 0.2587313776957884 0.9609932797580575  
0.0968041414793028 0.5382267225644054 0.4633087328275263  
0.2915577694890354 0.0552809002799144 0.7401663019362732  
0.5956808693950342 0.7601682926688567 0.2462946893192684  
0.6049719902432096 0.4041596845123712 0.2405019705308881  
0.2885594754611852 0.4046830237919824 0.7372611472864128  
0.1081291466523246 0.8922735908529879 0.4738944827943621  
0.8006790740154389 0.9071105742418873 0.9667781120221581  
0.7976933729360545 0.3935268424069386 0.9661828498835149  
0.1092085891991560 0.4033549603360767 0.4679533530421320  
0.3134511289251301 0.9242298344007712 0.7254218832925059  
0.6120931280908236 0.8935112646330761 0.2210366665945168  
0.5254292390012449 0.4390393891297635 0.5805596319009323  
0.3774611655772833 0.3557101084507057 0.0732399705081822  
0.0283927259540500 0.8613981064847853 0.1317443211959755  
0.8759484788707311 0.9369417359742970 0.6293044135783875  
0.8745113461830053 0.3629733362644086 0.6277188619284243  
0.0220222403972799 0.4419851360824593 0.1313310463891357  
0.3723478680699311 0.9424298031185977 0.0774518718444831  
0.5269679068450266 0.8629696270991029 0.5656046075607217  
0.5208412166207916 0.3520983305127435 0.4246735017738683  
0.3921551411895391 0.4401755837437317 0.9164850119539677  
0.0242691559061770 0.9443335579869579 0.2917179566932814  
0.8756768942426415 0.8568185747177413 0.7923727352812209  
0.8752845855174465 0.4448406614244420 0.7892854239634751  
0.0209064979943910 0.3568622042232909 0.2892229590293634  
0.3553869578610039 0.8566105527153159 0.9251765721716415  
0.5128080581193152 0.9439278608893058 0.4029258770529033  
0.4614087697374495 0.4689595650141082 0.4111470716057681  
0.4349895929706619 0.3145650216450962 0.9034179791358122  
0.9667527476429748 0.8247793985135534 0.3003807474596035  
0.9457788653800548 0.9697681104713710 0.7903685114592847  
0.9392436115617890 0.3285348277948766 0.7933459081894438  
0.9654177963081831 0.4773869529641170 0.3052247039870618  
0.4458023838189242 0.9549296018988360 0.9158477504738469  
0.4687730409093054 0.8181754808302388 0.3970799188981038  
0.4872302670547595 0.5113041002999680 0.7366098960642807  
0.4221959931036969 0.2738800386578271 0.2154691554485166  
0.9849513115322007 0.7748768229852265 0.9946898537885023  
0.9156637040610293 0.0255727140797610 0.4933036037153393  
0.9137287977406917 0.2749948431561131 0.4903628189876033  
0.9761821989883137 0.5265673246490308 0.9927068432378586  
0.4148855220441092 0.0203588285287373 0.2219291409983539  
0.4917359188078616 0.7671250431587678 0.6927146064242307  
0.3989964582423304 0.4328872590932216 0.6364965279505076  
0.5043227147263198 0.3613972101667339 0.1284200085765739  
0.9013664303882511 0.8634060760590851 0.0795604241269022  
0.0019428333335868 0.9368617922547628 0.5712110675221741  
0.9999707675553855 0.3645793506587776 0.5654287635480558  
0.8942833855367333 0.4401583729124985 0.0827083302765070  
0.4996865127784836 0.9343030685650521 0.134381456424836  
0.4021560520446432 0.8588344948674107 0.6215711065804816  
0.4929039103219008 0.3791187777617759 0.7493090908402225  
0.4089956606064635 0.4046152951159926 0.2523180262369302  
0.9936184435369614 0.9045146049195804 0.9500511437469239  
0.9066760785395661 0.8962203498369427 0.4449971406013929  
0.9022855602242401 0.4049287394126421 0.4442633723469529  
0.9855420997157623 0.3957479537499526 0.9525495720350537  
0.4046011417078545 0.8873360686424184 0.2520151795135950  
0.4952022931965297 0.8938117435492579 0.7542168443013574  
0.3106673573527322 0.5316455852878631 0.6812639971058695  
0.5926569934213558 0.2735569568288980 0.2015861007343665  
0.8172511282253485 0.7749358349861349 0.0021556870201794  
0.0902025397721718 0.0246580840363161 0.5005097996170117  
0.0891228935425890 0.2737226313630909 0.5042798568408765  
0.8063285898148459 0.5251847818458326 0.0029225916488857  
0.5848931595426727 0.0241145211178304 0.2061980532010787  
0.3094777992102433 0.7902716215354504 0.7269610605606498  
0.2816506563867028 0.4381152802893741 0.5465791639512423  
0.6281267867459672 0.3595979398978811 0.0576943515246476  
0.7762575243030356 0.8596525587342740 0.1452097929030835  
0.1229461412616778 0.9446336232289042 0.6531899893808604  
0.1184439956709928 0.3582141687992123 0.6533326781655514  
0.7681232221270751 0.4395623923266837 0.1456091172405892  
0.6171808430537086 0.9536020442266122 0.0445998106140375  
0.2754348836504375 0.8578756514237401 0.5635592597020534  
0.3335575767426781 0.4808551480757255 0.3734315444787354  
0.5651998748993775 0.3217747201585856 0.8929869762899328  
0.8366342613413483 0.8241775361575817 0.3137609472680790  
0.0739483170022871 0.9742649492271023 0.8326256121250345  
0.0670111436661296 0.3277454813330331 0.8319373056054162  
0.8343743330286060 0.4734177387072618 0.3074966064533434  
0.5691514392835358 0.9782360891501501 0.8609802431242464  
0.3371161682886288 0.8234985309251486 0.3946421828402859  
0.2711802532882370 0.3618377482140919 0.3825825744194287  
0.6235196334353403 0.4426282804355323 0.8986678684163574  
0.7684859043693301 0.9388723454635407 0.3084725898523786  
0.1351631520365133 0.8559491904254080 0.8050702308269431  
0.1332514533726721 0.4431594052244045 0.8090883598953721  
0.7644842458369592 0.3590687944607046 0.3086644307437268  
0.6218438044589633 0.8585325669899438 0.9014743031803352  
0.2717609972665535 0.9399147307759868 0.4036905566844077

0.4176456319997160 0.5413179721049782 0.2612111604246052  
0.5002319638049917 0.2460397136850445 0.7653553977569127  
0.9066798140514909 0.7604361835893103 0.4463001862542777  
0.9889340985724246 0.0401739953150790 0.9442718325160874  
0.9862075963077819 0.2603906867020674 0.9472570134378844  
0.8969869625532774 0.5412651341694104 0.4438865023320585  
0.4703649364395815 0.0274843740177880 0.7543643597262883  
0.4032201346431262 0.7503788231086506 0.2647061440389533  
0.7020268769041154 0.2408579438882532 0.3077819602961705  
0.1903855784690938 0.5658870553484929 0.7881353761980782  
0.1953908053049296 0.0482591007690847 0.3822734907459217  
0.7032184957539680 0.7544996563167614 0.9047086349376096  
0.6965682551254289 0.5546826957319096 0.8959680886834522  
0.2032391375397444 0.2481053631304717 0.4063868601733607  
0.1983843247755720 0.7366842658896682 0.7988380723297730  
0.6963733486818555 0.0504621314659894 0.3108250938276959  
0.5865895091224941 0.2382762167324325 0.3967678990287010  
0.3092181515542760 0.5462165982391086 0.9007532340365811  
0.0767362068615608 0.0664828459801401 0.3086371638773953  
0.8158496079466117 0.7374144483007712 0.8089365236734527  
0.8114657974262597 0.5619421295193352 0.8085515257922948  
0.0902265641364466 0.2429851418252234 0.3078707269054445  
0.3079571015137783 0.7335379714536412 0.9077322438804236  
0.5820314543804157 0.0587308329338938 0.4012688778362167  
0.6132307363979809 0.1478641107685648 0.2556524203085226  
0.2974588785646007 0.6555469863396929 0.7442041652223852  
0.1190753641996122 0.1500499341647037 0.4495512786181050  
0.7814682268591585 0.6508283051148798 0.9532781961638312  
0.5256988770587303 0.2586810319707282 0.5688789258369272  
0.3784910216855400 0.5232416243447254 0.070800009881284  
0.0170286075942474 0.0297570725919343 0.1383944690853089  
0.8786741479927395 0.7710668337251150 0.6406384624662044  
0.8739386368465133 0.5315528406640695 0.6388664936554543  
0.0213198883419990 0.2681648783789481 0.1397306620439096  
0.3751653236444998 0.7690703112430105 0.0716307293696207  
0.5126605892314611 0.0214407778808788 0.5653747514948904  
0.4542157381019170 0.2371848204686740 0.4026659015466127  
0.4400497526450873 0.5642108751562444 0.9073436886602427  
0.9460446194818672 0.0530164105656096 0.3019319193253929  
0.9478966054604030 0.7451498335392136 0.8057310459978997  
0.9429138490284857 0.5599655041960632 0.8035299344998413  
0.9584430423838145 0.2395103364704543 0.3085846827209540  
0.4393651915825656 0.7533973597709299 0.8976449518143016  
0.4505670435301298 0.0624727379351418 0.4031158498564927  
0.4999363811894847 0.1393684440684422 0.6521063963316730  
0.3956392596879736 0.6459945492040839 0.1469091194080113  
0.9993799193696726 0.1498437106509192 0.0548668806222603  
0.8874702054884605 0.6515528855554203 0.5543873207023899  
0.4045751265664806 0.2316039213625716 0.6264567633308324  
0.5005910890640951 0.5665892192761306 0.1128544116377697  
0.8968296089629229 0.0673521446084627 0.0816980009116122  
0.9964002335527291 0.7262501054911567 0.5822028121368611  
0.9920427209481801 0.5721376667646082 0.5732126337249124  
0.8979766652512514 0.2335949806350890 0.0893566592825128  
0.4969832421055222 0.7308119485776949 0.1242275299959995  
0.3915140501235506 0.0690053298656209 0.6084922128065904  
0.2935521250747522 0.1599988631891223 0.6178552364945610  
0.6026630681816735 0.6495833418949369 0.1357875587080329  
0.7935361536654160 0.1513169447868536 0.0807674629634945  
0.1019874642545294 0.6467016350163235 0.5795305642513174  
0.2977491831885836 0.2822912466164927 0.5377528331194941  
0.6188029185007861 0.5282080487761014 0.0518028278400864  
0.7845266499308319 0.0299853956242502 0.1653483047670688  
0.1088718027747200 0.7689689916153232 0.6614870306676347  
0.0977740217819057 0.5231735510088751 0.6619505268890673  
0.7826926288154269 0.2746969783730036 0.1577498096412504  
0.6133396254931968 0.7704290186968812 0.0490793692180649  
0.2728847708030420 0.0372844149503865 0.5424624924456584  
0.3274783847062367 0.2431893171293624 0.3496007742365347  
0.5688527279537015 0.5645986267058567 0.8712002638571053  
0.8212754560721597 0.0571131628321847 0.3573448370419920  
0.0742702975786590 0.7414216264065883 0.8532936043795306  
0.0686550585641195 0.5547769813675264 0.8542964897198312  
0.8292997399535563 0.2437300036317568 0.3418715470070633  
0.5782239837091143 0.7341474732427897 0.8600085405708681  
0.3232530878320709 0.0591010341362290 0.3568569367163113  
0.4030561201544214 0.1487674479544423 0.2704694912010656  
0.4877553104123784 0.6440676448330327 0.7648251753503202  
0.9033629926447110 0.1494076501193253 0.42879282666381297  
0.9918403190879704 0.6505769159923407 0.9312237024778234  
0.4211505224837839 0.5863639042090779 0.5780551531273018  
0.3847479014283419 0.7116549766767747 0.5857995146651217  
0.3273868820847659 0.6249433841734372 0.4106221367183931  
0.5014598430089858 0.6852282756929725 0.4496891674398811  
0.2379353795597052 0.6441338080825757 0.5501108157272286  
0.5761383661020016 0.6535081744907757 0.6068910307626004  
0.1946680411028930 0.5984240351265182 0.2078750936269493  
0.2018033715932420 0.6312875460790973 0.3068803722272876  
0.6243088397071542 0.4718559298411544 0.3029377255320805  
0.2733219484618382 0.3343608036957968 0.7965568827371430  
0.1281299224285833 0.8254713731161557 0.4095933274167436  
0.7753096876106766 0.9729945364513810 0.9049154935152918

0.7739313800870600 0.3273194548838468 0.9037137667260982  
0.1264383714589172 0.4719717456165702 0.4067323149103437  
0.2802580709760308 0.9824706225405790 0.7952470272657497  
0.6283276202079144 0.8288074192772297 0.2918964658712568  
0.5254024446535871 0.4308370739877060 0.4594593453084510  
0.3775299769328931 0.3626246272727573 0.9508641823527910  
0.0292753427187280 0.8659845128817569 0.2539226080102950  
0.8775780477831668 0.9345280798445824 0.7517619800209309  
0.8740379471063674 0.3668068071755166 0.7499393279529916  
0.0255088244327913 0.4354535898429194 0.2531357131338471  
0.3723427895646100 0.9339623527571479 0.9554434444258992  
0.5265895149637000 0.8677774998013873 0.4443606313629285  
0.4748307997124145 0.4419163930545719 0.6762448902219371  
0.4284537291553885 0.3487534214706937 0.1670922955774498  
0.9768813698309815 0.8509131165700047 0.0386441175824175  
0.9256254760588631 0.9488785806814680 0.5343579995080533  
0.9232172232671698 0.3516555984762582 0.5316193085310886  
0.9693911173027711 0.4511059892371653 0.0390339501567771  
0.4235189528485504 0.9463926217483051 0.1714412282290219  
0.4778129840143239 0.8445866009292736 0.6598379415211755  
0.3212606580339024 0.4530983223234908 0.6512399194055384  
0.5822009200364774 0.3492953453313219 0.1567911810220721  
0.8241416461691270 0.8509615698424166 0.047851328483848  
0.0805220364613978 0.9499236467869875 0.5497755186088102  
0.0786299174035787 0.3497796724631071 0.5484938069525480  
0.8168845091720297 0.4498984549592340 0.0493752131696858  
0.5779768034767208 0.9511864486698366 0.1509781005285578  
0.3255234948644909 0.8560850186812623 0.6597787003351188  
0.2729708436042855 0.4386184073237962 0.4258610256017460  
0.6276580534719203 0.3639757116415236 0.9349786741484200  
0.7726193430182653 0.8616213178467196 0.2674688920364042  
0.1331574912388656 0.9354911846318650 0.7741024813030196  
0.1277464597007094 0.3647480742175636 0.7749397439714252  
0.7678678861809565 0.4367140688596639 0.2682673115073216  
0.6260746575241255 0.9387427453426153 0.9244597627278055  
0.2729344652685839 0.8616382769759136 0.4413671477479530  
0.4066537840028119 0.4709936920920042 0.3226528162950092  
0.4979976621180626 0.3167046825671141 0.8272358827303948  
0.9045661772919192 0.8277665613343016 0.3775618895260948  
0.0004313754469642 0.9714482857832057 0.8803309282671088  
0.994488907723976 0.3291425946578033 0.8824043210048791  
0.9001274491059933 0.4731851719396834 0.3765425213182208  
0.4949532867599060 0.9629962806502785 0.8199288260299049  
0.4023700933326853 0.8223634268362114 0.3251229452316433  
0.6239242899999842 0.2258556439259269 0.2897999633585184  
0.1207474308044519 0.0720347758789134 0.4112712124630378  
0.7786148093214853 0.7294927934962833 0.9178555597826499  
0.7737596213439736 0.5729908246317167 0.91600841141136402  
0.1255317169725044 0.2289431642001788 0.4169859480158950  
0.2785931704654330 0.7290877511007974 0.7931555541287340  
0.6195231722387942 0.0700533509932498 0.2931048225110325  
0.5214227251643726 0.2715198825418335 0.4480479961757942  
0.3771625704508756 0.5190843466193369 0.9466270839762561  
0.0161406496600991 0.0233227056823105 0.2606340704584826  
0.8794288078814093 0.7773487635285514 0.7629870181689520  
0.8759164698564901 0.5246256392487383 0.7610132486494898  
0.0231737034405334 0.2766962602283569 0.2617624669104384  
0.3714451752414146 0.7772585863946695 0.9483583646291839  
0.5153280582757427 0.0221636019619032 0.4427974948694766  
0.4819515563062240 0.2190375636516036 0.6535640409783645  
0.4231642632990320 0.5690933230134964 0.1454844307164195  
0.9750067652067222 0.0719664152444118 0.0544788530267306  
0.9178377377117952 0.7273299445221579 0.5558659700863131  
0.9130033665793129 0.5740174301849365 0.5525986587607459  
0.9757061803973968 0.2279283524112862 0.0578231645006375  
0.4184982277919176 0.7244526597792951 0.1492724684443841  
0.4680776070744309 0.0644822743933069 0.6458032291080437  
0.3245971483715318 0.2355109130678956 0.6302588690177988  
0.5792272976622321 0.5710731215143091 0.1372097759098619  
0.8169694266717031 0.0728148811956081 0.0732500783789874  
0.0760130856131601 0.7254897144578424 0.5710355769956718  
0.0717102132082249 0.5694805757793043 0.5700945253150074  
0.8184551233926334 0.2292185321553000 0.0712821204565914  
0.5770113158655273 0.7275461581469893 0.1369118489952508  
0.3127499099675489 0.0803517713927590 0.6278850932617918  
0.2748903048946291 0.2833050571700734 0.4198739172954445  
0.6261700723035076 0.5223073446811703 0.9291048444290041  
0.7683212920353800 0.0193556545509494 0.2846094030282438  
0.1292462790192982 0.7758087473130897 0.7804193225879724  
0.1243413610319774 0.5226980050235431 0.7795513051163169  
0.7701349672577170 0.2795456807103116 0.2790851860675525  
0.6275734938162801 0.7782697948532449 0.9274765502532463  
0.2664644624280489 0.0209966158789964 0.4222064188847431  
0.4018820840663661 0.2263771476064458 0.3102650311061354  
0.4955802316846634 0.5702987442335403 0.8193499475093118  
0.8965876160624349 0.0708783886008544 0.3952704054099506  
0.0000298273622760 0.7285236532591285 0.8962276268014008  
0.9954931098742205 0.5723678570168307 0.8951645054086922  
0.9008311192678621 0.2275627969544663 0.3922942639922108  
0.3971277140078824 0.0719937107943018 0.3125982027172743

Structure 2S=10/2

1.0000000000000000  
20.1473052208877697 0.0000000000000000 0.0000000000000000  
0.0000000000000000 19.7681594983396742 0.0000000000000000  
0.0000000000000000 0.0000000000000000 13.2309279702280254  
Al Fe H O Si  
2 2 10 200 94  
Direct  
0.2727338188236829 0.5721605926442983 0.7883231332839845  
0.4997463573500829 0.7294407264714388 0.8159839977973979  
0.3403056716547028 0.6309340441630548 0.6004304828327972  
0.4710390757577185 0.6626313076700661 0.6168490781854284  
0.4417966910474139 0.6020339541495394 0.3217518015544310  
0.4353422552838319 0.6836165432674612 0.3149695616552499  
0.5012038584890167 0.7445724744073881 0.4678755022677018  
0.5014298433817692 0.6702372164752636 0.4329311123725411  
0.1952070916676894 0.6345608359098827 0.5990472228674826  
0.2279289756026096 0.6262541544449598 0.4900488039964541  
0.6072374577132403 0.6575360609833513 0.6906028250132317  
0.6012051376344912 0.6694958789599140 0.5739454816440300  
0.3754263084993240 0.6473776232176300 0.409128009466814  
0.2957885357549182 0.5744700354789255 0.3702614853820027  
0.7039044526078446 0.4789107423730259 0.3120501277877528  
0.1929030825673948 0.3239520134638693 0.8092993239823911  
0.2087424579818243 0.8201930548265880 0.4003226538205575  
0.6969882338033678 0.9673373712750246 0.884222952946450  
0.6932036830311076 0.3262893821863355 0.8910338797008076  
0.2054376216689174 0.4811674086665787 0.3942588258904955  
0.2019826529428406 0.9695267414637569 0.8093414804535772  
0.7065279491160759 0.8186399190010469 0.3012321967943162  
0.5916029755692762 0.4662800431956153 0.4152119931760849  
0.3048561008165827 0.3357534171332486 0.9086669158372339  
0.0973321613988928 0.8320202590342464 0.2970826898416972  
0.8140600547348815 0.9748649599093180 0.7953509908892191  
0.8058331426911982 0.3312051869863151 0.7901159543295649  
0.0942301123876556 0.4659796087851945 0.2925605847766627  
0.3165599066319372 0.9855549192927088 0.9027182892777575  
0.5978069286481282 0.8424900904719995 0.4041207368740427  
0.5928280666322845 0.5384499069922769 0.2474711486335535  
0.3010929150857171 0.2672330728334130 0.7363838286167699  
0.1006569208681567 0.7565358003358128 0.4639436911363703  
0.7913831041852954 0.0425320785186177 0.9652103579875669  
0.7996085959274527 0.2600053968640728 0.9597644269056956  
0.0963377412219712 0.5387221779738404 0.4621990120838476  
0.2899802060282587 0.0558756518399646 0.7372938771350013  
0.5925325135755970 0.7599085584955532 0.2476374896878278  
0.6057791608338220 0.4037999509262673 0.2410973193769747  
0.2879450996588592 0.4024902548135447 0.7356865848320149  
0.1091549373584274 0.8918133702534072 0.4746596498350042  
0.8042227413557624 0.9078708810557116 0.9657021784164508  
0.7950235584562940 0.3950257335530882 0.9639569632534821  
0.1101516120830596 0.4036992655770384 0.4684998006673240  
0.3138848691007233 0.9250206008139497 0.7223144450749202  
0.6105908174124973 0.8924849985032309 0.2190526712396546  
0.5238955439896088 0.4414200377156658 0.5788587920261191  
0.3776982953177567 0.3551500742640479 0.0717028401795016  
0.0277293590282400 0.8597536486199054 0.1329228188037976  
0.8766613319525096 0.9368568987581601 0.6293534030259555  
0.8753685108683626 0.3622233612874096 0.6281710553133192  
0.0187971249550356 0.4424106808051548 0.1327310494670063  
0.3723784763497613 0.9449504109489760 0.0758162451920631  
0.5272315159606243 0.8653141171052188 0.5653115878332848  
0.5179471253398729 0.3536182090283214 0.4237454930126627  
0.3891345816719514 0.4397868476292041 0.9149194948839374  
0.0228891104341272 0.9433861687955606 0.2923445944137758  
0.8765882687497263 0.8568678376745613 0.7924797740194719  
0.8767839725046214 0.4446609463320350 0.7892639851056624  
0.0170243409965985 0.3568529090592207 0.2901163501607844  
0.3537154087217357 0.8595129900371553 0.9234340158649915  
0.5138422601283883 0.9467806352659136 0.4017796043689682  
0.4598201630193518 0.4706333488771319 0.4077910764097141  
0.4343667315666402 0.3151214590445685 0.9005748971124681  
0.9666178653391208 0.8232169453334444 0.3024981293000163  
0.9466542951901921 0.9696205592588619 0.7905605611156371  
0.9375799287011465 0.3267601292165486 0.7958721253070231  
0.9647414165633860 0.4789021090561440 0.3082738054035371  
0.4459505956123034 0.9565146145212410 0.9148781601658650  
0.4682585844726135 0.8220601214469109 0.3985998805967298  
0.4858501926970165 0.5116718735469008 0.7379169059972840  
0.4234838044975497 0.2737715438377034 0.2141022787477301  
0.9827371062487229 0.7750691908070589 0.9941825127952667  
0.9158717705883539 0.0253343529164035 0.4929490731356774  
0.9138087175226112 0.2752324542794762 0.4889219138730151  
0.9742677069202735 0.5258297415841653 0.9912985704316462  
0.4171243755171763 0.0225436999481281 0.2198523832624782  
0.4997536186356707 0.7693801356088497 0.6969527525265128  
0.3986489950824340 0.4315978626317159 0.6360574110545870  
0.5040943988225846 0.3635950138725231 0.1293429543205582  
0.9006763477164860 0.8633431553670512 0.0815735108347169  
0.0022356722654344 0.9365053695380247 0.5695436069219572  
1.0002748711240388 0.3645064492062775 0.5638272183398039  
0.8915750827575105 0.4406336993537702 0.0814682289749448  
0.5004218757043920 0.9363658144348458 0.1298320005665266

0.4040097386433910 0.8559165991365306 0.6264179029427679  
0.4939181635281021 0.3799546599512291 0.7476608507945645  
0.4060696105539761 0.4035014147621996 0.2518879928123512  
0.9930683875287262 0.9052697425641550 0.9523379205120124  
0.9059686871781608 0.8957811131198437 0.4450334017806189  
0.9011327809329924 0.4056422487200869 0.4454876343397314  
0.9839368697679330 0.3942721413791560 0.9547562966668262  
0.4062817211879112 0.8899940801433149 0.2496883969647492  
0.4971520104761609 0.8968067899846665 0.7537442207756679  
0.3135751301257744 0.5303383157736452 0.6879271451112091  
0.5923548718950721 0.2740555738644067 0.1994533198401135  
0.8169417897377103 0.7754509170782334 0.0012143137852639  
0.0908311592308458 0.0243682531023873 0.4993099082851112  
0.0900852239872595 0.2736595772539235 0.5044114903040913  
0.8026161094349424 0.5260809855411275 0.0041905941516745  
0.5852069998187228 0.0239020424612809 0.2084502662125536  
0.3053926034117552 0.7913073114508058 0.726848336201096  
0.2814595713810710 0.4409432294873497 0.5469092113503565  
0.62779854562335354 0.3608768966649818 0.0572498007443980  
0.7743826355055866 0.8605707118449794 0.1427949921376887  
0.1224496143487455 0.9452684083540452 0.6534612409698073  
0.1184055842069145 0.3580064072359205 0.6532425326060552  
0.7655027890683108 0.4386868960428245 0.1447251851580316  
0.6197845695124194 0.9557138417643710 0.0457365720241255  
0.2795818603163425 0.8568940163329738 0.5595036130085593  
0.3311715559663740 0.4819109444561078 0.3706738129496171  
0.5643117593508726 0.3232334051019047 0.8935907873465984  
0.8360309172166912 0.8269644346060790 0.3101544336316995  
0.0745193720416223 0.9736534820358906 0.8343215653552808  
0.0657265588415048 0.3289990955873038 0.8312994993003182  
0.8341186866292544 0.4712801821615580 0.3042679200618477  
0.5699182373099406 0.9798458766597152 0.8635322322461318  
0.3371790770301581 0.8226188155624862 0.3860045792558863  
0.2691100940853597 0.3626572206811826 0.3843770728908447  
0.6257943747681057 0.4428126410099153 0.8976922616330172  
0.7641648035000093 0.9394781774766793 0.3060837919206508  
0.1349045551864259 0.8554960411620200 0.8040159655969558  
0.1331690589926016 0.4435167666635396 0.8079232278231315  
0.7620455680536120 0.3585552172732860 0.3080837622688437  
0.6197449475767942 0.8587255177443790 0.9053585606661876  
0.2719124463590538 0.9391675290040593 0.4010324962078281  
0.4169555335980542 0.5390891851300403 0.2539524071692488  
0.5013231889793712 0.2469330560202986 0.7642764912857194  
0.9012825482382932 0.7598731934897622 0.4443457173960776  
0.9894394614847661 0.0408734025679995 0.9439654881428410  
0.9880845505030886 0.2588882991028991 0.9474487280808503  
0.8911526009650613 0.5416676637822085 0.4431086144075428  
0.4723531565638885 0.0302947989693851 0.7553870177642925  
0.4108254925711094 0.7542346317383143 0.2562741022028390  
0.7021667480979417 0.2393000985366263 0.3046936633272688  
0.1878838911134877 0.5665104134012107 0.7816800341135265  
0.1960414218206036 0.0484022640015253 0.3812592730844021  
0.7039710921718449 0.7568008218771617 0.8997051886587204  
0.6946014408611321 0.5575000293816854 0.8931118603018684  
0.2041037850518911 0.2468097409939187 0.4066710639247427  
0.1960203535926480 0.7349970543721801 0.7971018935851512  
0.6967481094038983 0.0540643404178794 0.3102954021516989  
0.5872409555497227 0.2416576748925690 0.3955104264517449  
0.3034257421950998 0.5446895259163415 0.9031962180256423  
0.0775323710711848 0.0648098884807621 0.3068484792450998  
0.8168544697818877 0.7372283085143359 0.8079501800025889  
0.8109205490662438 0.5608277519824840 0.8094509752753606  
0.0909475216988713 0.2452776127785672 0.3077386847636187  
0.3048195510689672 0.7366368675620579 0.9084342351593689  
0.5826182750593746 0.0613600174249711 0.4024510840583756  
0.6107634020295005 0.1489468638364640 0.2548861896750174  
0.2967023279297398 0.6552549598437701 0.7493564230704630  
0.1183477445345508 0.1498910012154720 0.4468723667913592  
0.7805118858528726 0.6517015873183361 0.9519464064749421  
0.5255499113572439 0.2603622314787414 0.5676938726002316  
0.3752746568787988 0.5238049741282969 0.0688257696058028  
0.0160901658155776 0.0280196625574400 0.1380922871797135  
0.8785829194824225 0.7721316736433238 0.6396373202738861  
0.8725473624299250 0.5313267022487933 0.6389177380488423  
0.0216551910122756 0.2685063034236970 0.1401692926129463  
0.3747712390243167 0.7707973531553747 0.0679932269185525  
0.5129322761801349 0.0226761412472867 0.5652320315566500  
0.4548637026809027 0.2368190874641912 0.4015752036949848  
0.4351094969744063 0.5641899334763051 0.9060472373850623  
0.9466250299689060 0.0537310943902573 0.3022180114161389  
0.9484953579309479 0.7446670665812583 0.8038073365012878  
0.9423335428446885 0.5610459274285469 0.8022668330843806  
0.9592610269160329 0.2371832980226034 0.3087431149035582  
0.4365760414734134 0.7561927964392142 0.8928413936035903  
0.4508284111309179 0.0645916210872027 0.4025418275394976  
0.5002994903205523 0.1408781660223368 0.6498012122081284  
0.4010250582465067 0.6474739653323691 0.1425218553000525  
0.9997363294393814 0.1492763462269199 0.0579437237011406  
0.8850773716040583 0.6517415488810073 0.5553682486268351  
0.4045310301297874 0.2328753863334955 0.6273939437462686  
0.5010487658758531 0.5629137242589048 0.1074177959832237  
0.8964459897952838 0.0670741047454716 0.0802768143852298



0.9945885459538903 0.7268513516152778 0.5754803646495784  
0.9893889481626467 0.5714623305193185 0.5668795422472688  
0.8986224145147707 0.2339458729226955 0.0888075873028453  
0.4998235719973794 0.7341266621304794 0.1108743641480787  
0.3920320997033293 0.0691058279785009 0.6093709689561368  
0.2942212696441071 0.1599373087966658 0.6136238926581831  
0.6007598804513875 0.6489580308393865 0.1366650192640411  
0.7939563039036464 0.1520872023729151 0.0788440972590078  
0.0991165675601676 0.6461183473443606 0.5803098966554670  
0.2981457945644486 0.2832554596463244 0.5378137293044254  
0.6211652151755960 0.5279095372000258 0.0524104146313950  
0.7840397644999670 0.0309569730549582 0.1644124298166516  
0.1049868181689175 0.7685962390654775 0.6623040995103917  
0.0925100598216260 0.5221958191784740 0.6615212056474967  
0.7832125260229471 0.2753983525415556 0.1562934821906461  
0.6215806412669651 0.7699794892885259 0.0540848977336942  
0.2743348631242213 0.0364638545795233 0.5400068183932517  
0.3282047258032680 0.2459823092737557 0.3487733532287929  
0.5655505669283534 0.5626843976559657 0.8765584582598521  
0.8216038949289310 0.0552943457569725 0.3566721774999357  
0.0737290902544942 0.7419055568722273 0.8560287877150702  
0.0678265693784008 0.5544159455912764 0.8550285192645217  
0.8296242470859175 0.2445268617579203 0.3401408565050363  
0.5771771873031829 0.7325775358231373 0.8715763426170242  
0.3238508336964298 0.0578753639247732 0.3541163657522911  
0.4016902211382321 0.1497591339605638 0.2696230367556213  
0.4871732853671879 0.6447625011670727 0.7715138308714172  
0.9015751753747555 0.1492173271216448 0.4288991981543585  
0.9910346277648711 0.6504549947442850 0.9318659226155052  
0.4234104603105358 0.5860632185865275 0.5795823507150236  
0.3893233977414238 0.7102568903549468 0.6072995943777036  
0.4451781103679308 0.6449798338411694 0.3605666311368096  
0.5201087763194481 0.7005555238684881 0.4872435930078197  
0.2365832625075767 0.6248295743139367 0.5632015203674940  
0.5856862361701768 0.6409587657224080 0.6293934987563862  
0.2818468313137721 0.6225996085961264 0.3725351400895606  
0.3300401054901795 0.6529668205895245 0.4427807917356907  
0.6238892367485271 0.4720345470012942 0.3030286657044070  
0.2721829705569825 0.3327904974361672 0.7961389405440581  
0.1287573385935542 0.8251089946337726 0.4100726635954057  
0.7758008800203524 0.9731341581168133 0.9038236960590403  
0.7731739568798558 0.3277337693479043 0.9024893019484560  
0.1256287724598600 0.4722082519540982 0.4055395015213137  
0.2802940191577804 0.9829091039906631 0.7926265895397332  
0.6270186302989693 0.8285144238507263 0.2913179297029322  
0.5234953980783125 0.4324578932707460 0.4579989610851324  
0.3764659455765714 0.3618499373926730 0.9493432447980334  
0.0285806851037062 0.8649346916988409 0.2551224813139835  
0.8783961229164140 0.9345815859562763 0.7517262233612282  
0.8739531596075482 0.3665469621733521 0.7501903929958096  
0.0233367984925184 0.4355654835350542 0.2543984079994817  
0.3721914454301164 0.9365062059549113 0.9537082273066225  
0.5270592333334448 0.8709831490784700 0.4442693971460020  
0.4742265933943319 0.4428519660123555 0.6755654942348168  
0.4282172489760928 0.3488098817399697 0.1661970153334357  
0.9759602579272310 0.8508605546193323 0.0397004427361112  
0.9257477121612003 0.9485743473641105 0.5337582908383798  
0.9233174610928651 0.3516828007327798 0.5311056741851645  
0.9671228332731074 0.4508005036564510 0.0392610620397124  
0.4246619456829356 0.9487891066231949 0.1685037420849824  
0.4807508543465429 0.8451282512903618 0.6620773925019230  
0.3213108606468086 0.4526742937127398 0.6525186322214924  
0.5820892776269256 0.3501852770064200 0.1563393042695740  
0.8238042246704869 0.8513651895078304 0.0473897701537331  
0.0808378630598508 0.9498793499725664 0.5492597397147942  
0.0790547377944385 0.3498418576210604 0.5480076620483045  
0.8141472940970466 0.4503863105146138 0.0487108613624420  
0.5786205153535051 0.9519925593241756 0.1504194342688767  
0.3264864234567482 0.8555230633279255 0.6594235083470915  
0.2715230238351680 0.4395631571103134 0.4265289982492965  
0.6277884404015702 0.3641749671041647 0.9345571233640551  
0.7705734048828528 0.8623477399280385 0.2650540882685214  
0.1331674621795390 0.9351804479386039 0.7740838928313469  
0.1271130991481237 0.3649547951347031 0.7747682620536103  
0.7663587000505335 0.4360949288661068 0.2673616484892230  
0.6266060838716494 0.9391906278990942 0.9256864404737593  
0.2744211206456835 0.8606205199324202 0.4376767303480028  
0.4041773998664671 0.4705123621321357 0.3206030731606684  
0.4980980024967483 0.3176647059699906 0.8258209604485899  
0.9028540193487175 0.8277726416077199 0.3766822643147570  
0.0007676688008874 0.9715474250155153 0.8812779029661364  
0.9937952574537597 0.3283548760134064 0.8834963440045921  
0.8982134944556022 0.4733892089609357 0.3766823209640361  
0.4961319916195591 0.9652159627711470 0.8203896642676964  
0.4046188719334081 0.8246010726232110 0.3217015808424243  
0.6234673831308847 0.2267629520101472 0.2882479157914490  
0.1211525402510139 0.0716428906606684 0.4097019458508101  
0.7787369774440444 0.7303063085042266 0.9161098193304820  
0.7721469967606632 0.5737575534614240 0.9154081409796633  
0.1259379296503086 0.2290850027429187 0.4163952901133768  
0.2764083026513485 0.7294325392170667 0.7935279924475239  
0.6193578731053314 0.0716436799593140 0.2934795121686254

0.5211610650394414 0.2730366962427170 0.4468601159980872  
0.3727448670464454 0.5182932482662007 0.9447243828627137  
0.0159017352365542 0.0224272061217139 0.2604358733248496  
0.8800441074141052 0.7775692707673046 0.7619194858431467  
0.8755670667824839 0.5244750306833067 0.7609505206908254  
0.0227109635454541 0.2769172881138823 0.2622292846525678  
0.3693645340522746 0.7800615713340222 0.9448707380227300  
0.5157170673650430 0.024647064328314 0.4427709075265199  
0.4822170962385169 0.2204160521741006 0.6525233363819456  
0.4236205437663518 0.5686817482139458 0.1383182159106634  
0.9748806110195800 0.0715749330487225 0.0547447121129689  
0.9155097872852823 0.7274707954693396 0.5536820537172548  
0.9099321798157145 0.5740190543426803 0.5512121311598972  
0.9765210762088591 0.2275508587007153 0.0585291559018541  
0.4220952991690098 0.7269295329837410 0.1399444545460030  
0.4687534731149249 0.0658329700325255 0.6459054974319278  
0.3244678067138803 0.2354800544156335 0.6295627288429269  
0.5792411540800724 0.5700063462747875 0.1359997691090184  
0.8166289704229870 0.0733200559343459 0.0719485034223049  
0.0743955193219327 0.7250503014541672 0.5700928117480901  
0.0690597760489154 0.5690470538404377 0.5684551923740250  
0.8191957436963008 0.2299253913119051 0.0700029163658424  
0.5787520932077652 0.7279577875920441 0.1359846819599176  
0.3130138411783879 0.0803210692296271 0.6256419668343235  
0.2748100448593693 0.2839680519277357 0.4201773738888234  
0.6261240400076832 0.5222879691175252 0.9292882746967387  
0.7673838267893383 0.0200856318651948 0.2834619127692677  
0.1275034526862311 0.7754020166104402 0.7802707180551581  
0.1220761802794212 0.5225851086351726 0.7774535214733417  
0.7698134671166758 0.2793770631380588 0.2775176887177414  
0.6290559947237024 0.7787023233905498 0.9310167212432624  
0.2670757226267789 0.0202086282074555 0.4199547848677358  
0.4021201012942181 0.2272153885678264 0.3094621425926249  
0.4933745875474568 0.5697833183438400 0.8221811271899044  
0.8964426119481410 0.0705998316482841 0.3950727538768093  
-0.0009132412099880 0.7284236942033371 0.8965109863968991  
0.9944467179592247 0.5723097806724429 0.8949196044651765  
0.9006393136641518 0.2272606746558003 0.3915345471543430  
0.3976241634803472 0.0728717829275399 0.3113016147320620

Structure 2v S=10/2

1.0000000000000000  
20.1473052208877697 0.0000000000000000 0.0000000000000000  
0.0000000000000000 19.7681594983396742 0.0000000000000000  
0.0000000000000000 0.0000000000000000 13.2309279702280254  
Al Fe H O Si  
2 2 10 200 94  
Direct  
0.2735699682084045 0.5723900016754907 0.7854501930679418  
0.4998592039832832 0.7299976387505414 0.8171516999452909  
0.3410919799371850 0.6320762109332466 0.5960995013232044  
0.4722272352530382 0.6691499984428231 0.6168616421274009  
0.4439532417878925 0.5993858683371046 0.4569815178410110  
0.4508780972386167 0.5901666725653684 0.3341762488064568  
0.4961231409113079 0.7495333338309811 0.4620085998361139  
0.5029962901636743 0.6741327222298943 0.4317190021374616  
0.1992549514272218 0.6326344383477575 0.5951811212711463  
0.2307868049240778 0.6250490448741545 0.4846086810214028  
0.6055985316885728 0.6517864822574873 0.6905085342406058  
0.6044733562643863 0.6739329600429746 0.5766752726305864  
0.3760836185407629 0.6512756899699370 0.3989199075462572  
0.2989403118397991 0.5768395745005873 0.3650177233082820  
0.7033223688820505 0.4788459158725827 0.3118926848350419  
0.1927046655243177 0.3251176939303250 0.8088482496201227  
0.2091029226297045 0.8204095092236325 0.4011289326257526  
0.6969656734040602 0.9664662907170637 0.8839131499893622  
0.6928069376925368 0.3258990998621396 0.8915664779146315  
0.2051093257867227 0.4812768306155170 0.3935032243430995  
0.2024899567085911 0.9687537750103425 0.8092020233060032  
0.7068597705874010 0.8186816145372487 0.3018133476969090  
0.5906567245178327 0.4671884201876396 0.4147032629415870  
0.3044985330726436 0.3375204888399584 0.9080025692766761  
0.0976488825150002 0.8323673782331467 0.2974866698307587  
0.8142707859540271 0.9749643588170447 0.7953564407011758  
0.8052068511540188 0.3319586504284547 0.7896934496557549  
0.0937575587662547 0.4656426254142249 0.2920991505542124  
0.3165006352584450 0.9848368688900009 0.9039971557667984  
0.5983228138675150 0.8432797797457195 0.4047062240706443  
0.5920626599946902 0.5377486390924446 0.2457266284633097  
0.3010724007822267 0.2690272217452722 0.7357504142225518  
0.101117279789014 0.7567229653996959 0.4641685726005800  
0.7906709384937189 0.0425951668559688 0.9649036463035185  
0.8000119875055124 0.2604962588876995 0.9591231561260350  
0.0959607965724289 0.5383081520425472 0.4616259391754840  
0.2901323025879889 0.0557834243755526 0.7382200688177116  
0.5931823318370950 0.7595251867001364 0.2490953572530697  
0.6052235935972000 0.4032068703732658 0.2422365579791532  
0.2874054725646079 0.4044580877003809 0.7351125160685922  
0.1094526755893362 0.8919934147487616 0.4751433274085454  
0.8029835103378238 0.9080366212836475 0.9655995409595791  
0.7942667094713342 0.3955696404561836 0.9634783160398802  
0.1102663096459409 0.4033366664442058 0.4678809951739212

0.3154124634150973 0.9254023651502219 0.7233204840099474  
0.6108383951460548 0.8919652760986048 0.2187618715899140  
0.5242233271200295 0.4414287559614962 0.5787829584387302  
0.3777021713416915 0.3556752013844873 0.0709315155239722  
0.0275830178444445 0.8594550153505003 0.1335565324017160  
0.8769828729227288 0.9371663166896942 0.6295296492305139  
0.8754012984192696 0.3621762907285141 0.6282951027664859  
0.0178841028293985 0.4425187464402365 0.1328663248416757  
0.3725134133599602 0.9450902637768066 0.0773841690475008  
0.5280834958894094 0.8663375149842243 0.5666111934593620  
0.5185252633237973 0.3533861116710810 0.4239428146953813  
0.3896542431084012 0.4407183882297427 0.9143181719617225  
0.0224426018186149 0.9432946084387812 0.2926998819595411  
0.8769446330183815 0.8570153137931644 0.7925153033884328  
0.8773533124003291 0.4447370527583928 0.7892635737161190  
0.0159407355616624 0.3569393214381900 0.2901922801548040  
0.3530590885449082 0.8583641733414641 0.9272118567450000  
0.5149441497758549 0.9477926726411793 0.4028274711755969  
0.4584213982465808 0.4690474942482515 0.4088601747378799  
0.4337201713484584 0.3157057935286098 0.8992675447211591  
0.9670155932261222 0.8228052210227113 0.3036632205342509  
0.9470458433244857 0.9696485361994481 0.7907977424404448  
0.9369431432031903 0.3262073853870021 0.7963932660997630  
0.9642897602769790 0.4791675992785778 0.3087779804558583  
0.445429683106357 0.9554128012971798 0.9156123559070997  
0.4682932554910218 0.8237573406398536 0.4008537590767473  
0.4840713023229773 0.5134177870794571 0.7345308945607977  
0.4235387103184377 0.2722586406579656 0.2115034274597848  
0.9825123939141932 0.7752007568490896 0.9943763060828714  
0.9160914660517487 0.0255427626605626 0.4928769132730269  
0.9133437122499743 0.2753426507569121 0.4885129466644325  
0.9751729887002851 0.5253460221293773 0.9898585639563522  
0.4182311061117580 0.0226972461295879 0.2205948397220056  
0.4993791612351179 0.7690669021539006 0.6965224849840664  
0.3990991268596984 0.4304856083271418 0.6355594991054252  
0.5038269273306072 0.3636827494961127 0.1293548351422388  
0.9005016247054506 0.8631585940081792 0.0824059810222425  
0.0024664842185084 0.9368450926285784 0.5694007771231695  
0.0000722087694912 0.3644950166383577 0.5629343030120629  
0.8909422002973403 0.4416189131667003 0.0804653113517614  
0.5007142948147024 0.9363586009656594 0.1299103216340798  
0.4042913052590495 0.8557305054835455 0.6263057182611619  
0.4953875566870151 0.3817073213271210 0.7495223135670002  
0.4050741506899141 0.4002793600619355 0.2537226419615044  
0.9927550253247925 0.9055533970959003 0.9532604800884599  
0.9060411950908377 0.8959418429928521 0.4452838010619236  
0.9004607609894635 0.4058178888996049 0.4456603321730758  
0.9833149081864510 0.3934375919393632 0.9554015676279174  
0.4069658921309438 0.8905966345190580 0.2518264285073515  
0.4972592409323345 0.8959471175829447 0.7552678459266342  
0.3169756277460669 0.5317179746841645 0.6856403086023822  
0.5921460505426043 0.2739242213009314 0.1987238383291705  
0.8169221881322472 0.7755123035853816 0.0012860124165077  
0.0912353600198428 0.0246021739547220 0.4989994832889512  
0.0901709014552625 0.2735181482812585 0.5045847519517248  
0.8011456833561252 0.5265343743679510 0.0043552910639158  
0.5854000550650603 0.0234202008235022 0.2099608224452481  
0.3052419455351695 0.7919843540992726 0.7275929186671269  
0.2820720243578062 0.4422175869667582 0.5459255700710234  
0.6278749665479562 0.3618707697928168 0.0579210176133515  
0.7738295498909291 0.8608205780647974 0.1423473061156522  
0.1223921176213260 0.9458670426703615 0.6537845725524176  
0.1179217575950044 0.3583672668724525 0.6530092555303809  
0.7649455898900750 0.4386545145199812 0.1445163420887418  
0.6202545223341337 0.9564149622082013 0.0464126969049563  
0.2792788275326258 0.8579357090475901 0.5607792948792972  
0.3309124528183626 0.4823211442193630 0.3687938110615498  
0.5638284352764530 0.3233373915265179 0.8957296631034541  
0.8364218347685520 0.8282377912335787 0.3090155018630091  
0.0749594619414151 0.9731990770815555 0.8352918913198227  
0.0652913881326422 0.3290099353115865 0.8309949736303901  
0.8336283669613668 0.4709684863926072 0.3039021323174893  
0.5696335768667534 0.9797626625084012 0.8644532286057686  
0.3376867760350596 0.8240134610149209 0.3885844959103675  
0.2692342177335816 0.3630168761926005 0.3844749089494061  
0.6259851357347145 0.4427184725174150 0.8969838713471403  
0.7631481287507701 0.9399556887663657 0.3053757392353197  
0.1348500869929396 0.8551765928844111 0.8032980046549449  
0.1318015266984419 0.4439582531539674 0.8078812917031394  
0.7612932721113073 0.3583627896931971 0.3076432571075214  
0.618866081144001 0.8587250851084489 0.9069919936474207  
0.2711309238129177 0.9397541292147915 0.4018092910088311  
0.4192381046626644 0.5350885966439988 0.2513144422944470  
0.5019303872717880 0.2482455708825408 0.7637846282568528  
0.8999616950009874 0.7601189864955565 0.4442504422251532  
0.9899468889237644 0.0411633066409968 0.9438098996513252  
0.9884340054114900 0.2581957958755618 0.9472211561065585  
0.8899314663123834 0.5417832641723394 0.4429228306637529  
0.4719702741180207 0.0294888202403881 0.7560387587358128  
0.4099657393709477 0.7545309356299309 0.2600216734448993  
0.7021364941881982 0.2387454933094167 0.3034003848118532  
0.1888916092244611 0.5652069355026095 0.7761805535793711

0.1964530773969556 0.0493730761206037 0.3810088575266729  
0.7037946934477759 0.7576093394449634 0.9002795436493723  
0.6943022578801865 0.5577280230296841 0.8905283200444485  
0.2041776006123923 0.2471549441741110 0.4062114715239707  
0.1961020713881652 0.7348668067981909 0.7971782605375975  
0.6970302113758680 0.0553778408182304 0.3103332101815591  
0.5875924356750211 0.2417605578283657 0.3951009372095879  
0.3032824299862242 0.5449163006572070 0.9008925047173892  
0.0778307356262739 0.0644286268938630 0.3062731464460940  
0.8167134993082260 0.7376928380593653 0.8078795116365239  
0.8117149329183152 0.5609770891706641 0.8097696370715719  
0.0909594602434488 0.2460669216037681 0.3075822532937637  
0.3053973372637777 0.7353500991238713 0.9081448395085813  
0.5831317795723638 0.0624294627409026 0.4034967500981393  
0.609996981557174 0.1489586711348939 0.2542719944076640  
0.2962650294094867 0.6557990390903081 0.7462898660143996  
0.1181534057373087 0.1501509286806492 0.4459366191109621  
0.7797972106736027 0.6519858269509854 0.9511686028997069  
0.5255478465910056 0.2596700198510921 0.5671115974505930  
0.3749882995912928 0.5249765826986850 0.0674216158516035  
0.0157268330171313 0.0275405359711893 0.1379993566062487  
0.8789785573216515 0.7722766013721460 0.6397579812203509  
0.8727990829493644 0.5314079437142815 0.6388974605868996  
0.0215718002462706 0.2687058379955086 0.1400989495792590  
0.3751274574306927 0.7678962125477492 0.0699428011461186  
0.5132983463698958 0.0234817447327022 0.5662247075719518  
0.4549967932362093 0.2372005099988471 0.4003456589480868  
0.4346634267542278 0.5653769903738539 0.9041226415317951  
0.9468559284147858 0.0541911577715938 0.3022056592885388  
0.9485627629955038 0.7445936518579318 0.8039620254733396  
0.9433565048165603 0.5609329069845931 0.8013941190378560  
0.9593062479522426 0.2368263929008562 0.3087268127717572  
0.4365288377005044 0.7565468776073404 0.8930901390560846  
0.4512738307479968 0.0653393988872416 0.4034302238209275  
0.4999402144815054 0.1410262394570800 0.6523002420593634  
0.4005910403527190 0.6463500964243507 0.1474046176537375  
0.9997233246114958 0.1491246807257586 0.0589854589842837  
0.8842170848828925 0.6519555970107916 0.5552442858327620  
0.4045989789698829 0.2334219159705588 0.6279943331229357  
0.5010387298096397 0.5635740826705923 0.1046405190881233  
0.8962603778640488 0.0669025892543758 0.0791430109984588  
0.9944261525328750 0.7263110609661740 0.5734844771829507  
0.9889551386449682 0.5724191718113881 0.5647542880735418  
0.8986772382434974 0.2341328168994909 0.0885306382385638  
0.4993331040935545 0.7330858704609901 0.1142646479227036  
0.3920442255391356 0.0693128627208874 0.6101103025093852  
0.2943457183848875 0.1603329384032532 0.6154655086211805  
0.6012631729011828 0.6488088818361311 0.1373134301802067  
0.7940334541989127 0.1523449898677250 0.0778132899330366  
0.0996120464928843 0.6458485874235422 0.5790139561254524  
0.2983631040342384 0.2831550558059726 0.5372214973620290  
0.6211625733477508 0.5285597309186467 0.0505805445764526  
0.7839652098479095 0.0314883263681277 0.1641804585520698  
0.1041961566169056 0.7677505545272553 0.6628340575098539  
0.0907554582296317 0.5220989230421470 0.6610001967823396  
0.7831839723058489 0.2756340042221965 0.1555216005904658  
0.6208887625977846 0.7695537331793254 0.0550806941217958  
0.2742937900212246 0.0372923927953118 0.5404281955470052  
0.3284007765649001 0.2465789744476012 0.3478399871145728  
0.5652421608656752 0.5620146022680463 0.8737249661300597  
0.8218040228322945 0.0549315528705367 0.3565170458532741  
0.0738277310716028 0.7418295758514127 0.8568924802780651  
0.0691836827397116 0.5564594905623376 0.8544619512949854  
0.8295645331326312 0.2446625879694625 0.3392896262663391  
0.5773499060476037 0.7325222182790919 0.8719217241341221  
0.3243893453851278 0.0577001868807471 0.3546255421996564  
0.4015588131713133 0.1495286289200788 0.2697177155395886  
0.4875788669829254 0.6456483590753942 0.7698701973986027  
0.9010965123977931 0.1493142350421340 0.4288618981000841  
0.9907489090299791 0.6504918458127352 0.9322339403137336  
0.4268809724660970 0.5910444748253587 0.5699420720310819  
0.3879081314615414 0.7119794407018457 0.6087869501119522  
0.4500931626615182 0.6241433962713168 0.3885287256545850  
0.5179173725769669 0.7074929511263833 0.4852460441669373  
0.2394997891270366 0.6208503649964712 0.5576760357281573  
0.5842247775503954 0.6432786340774508 0.6255671480288579  
0.2827128818927602 0.6242725551349954 0.3675324426997043  
0.3310013494872352 0.6579704196620657 0.4336859403918721  
0.6232959546806388 0.4720572357268961 0.3025813146750742  
0.2718925016138237 0.3344355579992265 0.7954704434799831  
0.1291403882388447 0.8253678677648649 0.4104476493369967  
0.7757421281094445 0.9729936994280052 0.9036211862221920  
0.7728429088408512 0.3280499917654057 0.9022354071445352  
0.1253494643229294 0.4719347124310990 0.4049195674499436  
0.2807857769893321 0.9827154583405482 0.7935187808905947  
0.6272669727582169 0.8284426275268079 0.2919738379417647  
0.5233154741292916 0.4321374407746385 0.4579251913652946  
0.3763670499767952 0.3628740965868812 0.9486278277180668  
0.0286315674188786 0.8648059979880853 0.2557439757570649  
0.8787169331196427 0.9347537440763776 0.7518839965262364  
0.8738122859320906 0.3666115993098255 0.7502662662173885  
0.0225793878773107 0.4356248367775036 0.2544554851318065

0.3719020552615822 0.9355942777906399 0.9554836431958035  
 0.5277791807540174 0.8719753028704371 0.4452947239320059  
 0.4745107711957101 0.4429715813822526 0.6753754652472588  
 0.4279895211834203 0.3478106413059182 0.1654463516710815  
 0.9757692359302558 0.8508825808344606 0.0403377368727488  
 0.9259574888818464 0.948811933235073 0.5338003180148384  
 0.9229978648617224 0.3517196779984150 0.5308379579450785  
 0.9667228283702692 0.4507596551189459 0.0387723962002299  
 0.4251072195130667 0.9486347545322807 0.1697702825874385  
 0.4809952394747000 0.8455666293503825 0.6621768481958026  
 0.3221143694905847 0.4533235963425573 0.6514057668460905  
 0.5818326815556083 0.3502302347593874 0.1564655297679729  
 0.8237201353070077 0.8514356253794781 0.0475343691109052  
 0.0810726130387075 0.9502352011495400 0.5493134400844824  
 0.0788663183148074 0.3497891458426804 0.5475976784408386  
 0.8133500181054752 0.4508430726732864 0.0483771910086741  
 0.5788493861262753 0.9518571849862488 0.1509555992349639  
 0.3267694146931865 0.8559411122986900 0.6599477456395546  
 0.2714390291936054 0.4401479300071749 0.4255826876244814  
 0.6277201954188922 0.3643481855242680 0.9351841762330660  
 0.7703248064203916 0.8628196187732965 0.2646803056120625  
 0.1333800855372740 0.9349689860242295 0.7741701876699398  
 0.1264414232433051 0.3653934520896233 0.7745183927667484  
 0.7657468699571328 0.4359522743813817 0.2671250796709923  
 0.6264929821189886 0.9391964237080154 0.9264985896870873  
 0.2744897060487946 0.8613465004648765 0.4387263893989845  
 0.4038573259105642 0.4684639984150251 0.3195792372365396  
 0.4983101031957197 0.3184551437191775 0.8263268336141623  
 0.9027134077001104 0.8280589601219006 0.3766992129390207  
 0.0010463486565464 0.9715301919919631 0.8817100371958903  
 0.9934626909879973 0.3278565910495964 0.8835908014663634  
 0.8975246600390014 0.4734731353608888 0.3766839321778304  
 0.4958573953737103 0.9646625622435858 0.8215521952481415  
 0.4047548092073679 0.8244744424709177 0.3230785913313548  
 0.6233222135487191 0.2266438922847801 0.2875002247010808  
 0.1213376220048574 0.0718385210839218 0.4091621871413202  
 0.7784928270722115 0.7307364754012746 0.9160019482053366  
 0.7717198865257966 0.5740502500888032 0.9146334150595385  
 0.1259915272956748 0.2293692107491987 0.4160264014597651  
 0.2765741380029381 0.7295519105894066 0.7933811703740770  
 0.6193811259047923 0.0719800357395889 0.2939692669982284  
 0.5213529450736373 0.2727509914408129 0.4463943918186814  
 0.3726089154883654 0.51924484769149618 0.9436896163476558  
 0.0158623634143822 0.0222956441630696 0.2603812671475187  
 0.8802087855568745 0.7777149050590886 0.7620181262956028  
 0.8762283452108173 0.5245631220643494 0.7609015729011506  
 0.0224314690016861 0.2770769544740761 0.2621711398729162  
 0.3694580449112198 0.7787435427396285 0.9476073002356663  
 0.5162577947362466 0.0255763755674507 0.4437550988657401  
 0.4822522917927330 0.2206335079243463 0.6528947968458672  
 0.4238988881899203 0.5684759133252568 0.1384492227620081  
 0.9748453006807196 0.0714428293370727 0.0546858250909409  
 0.9151485212067635 0.7275155469643401 0.5531880958522620  
 0.9093765757095386 0.5743415516186582 0.5506487307404906  
 0.9766057217629016 0.2274154755293483 0.0586184369719980  
 0.4217520733779095 0.7257252386754226 0.1464661392735937  
 0.4686597869467769 0.0658780793414191 0.6471363367427312  
 0.3245191582269380 0.2360157463425851 0.6297983000000547  
 0.5790012443912028 0.5701764988188582 0.1346036896573772  
 0.8164380262574740 0.0734751255526467 0.0712920803470540  
 0.0743276842524836 0.7246882857590171 0.5695913962187497  
 0.0685753957726452 0.5691682407358170 0.5674037365466578  
 0.8192997529776175 0.2301651769458422 0.0693428395962994  
 0.5782957163087016 0.7276196003513060 0.1376974574416270  
 0.3130355844579920 0.0805845509994947 0.6266225553926442  
 0.2749748203691187 0.2841997427039862 0.4196266208876892  
 0.6260044059748184 0.5223900711797417 0.9276392646406254  
 0.7672066022395405 0.0205471529099146 0.2831634165497157  
 0.1273898419703821 0.7750084930722182 0.7804135101362774  
 0.1219385683937502 0.5228986440809960 0.7758759885704440  
 0.7695989233856481 0.2792780864481387 0.2767249686708632  
 0.6287701550880971 0.7787517049005777 0.9323559512947499  
 0.2671720057086555 0.0207604966585904 0.4203728738818798  
 0.4021537371822118 0.2270960209609277 0.3084379902340137  
 0.4928716942433178 0.5703650214070329 0.8203853767174392  
 0.8964894120765490 0.0706753178095035 0.3949766910482118  
 0.9990381731527331 0.7284748003342891 0.8969020396621032  
 0.9952559185375149 0.5726069046909917 0.8943111719015957  
 0.9003972408252370 0.2272611208903048 0.3911786684247087  
 0.3981334288050891 0.0727839325472383 0.3118700384426675

Structure 2vv S=10/2

1.0000000000000000  
 20.1473052208877697 0.0000000000000000 0.0000000000000000  
 0.0000000000000000 19.768159483396742 0.0000000000000000  
 0.0000000000000000 0.0000000000000000 13.2309279702280254  
 Al Fe H O Si  
 2 2 10 200 94  
 Direct  
 0.2758857399536455 0.5720303746820943 0.7913589673301998  
 0.4977623991869914 0.7284025926438736 0.8159617397506340  
 0.3391509544260604 0.6247628076960019 0.5932994058475546

0.4665243876241295 0.6618772313415107 0.6155486283540158  
0.5428403425728754 0.6853960012338158 0.3003339698648513  
0.4674318792626797 0.6699606199811547 0.3093327673514360  
0.4833517860774427 0.7451894654863508 0.4694393822192514  
0.5131300268942859 0.6753604340001940 0.4330240112621443  
0.2091196515014335 0.5941462128832614 0.6401133332690553  
0.2020492121612794 0.6479412139199470 0.5543497970351997  
0.6029110753291653 0.6418335665356142 0.6898768443877966  
0.6010028170789929 0.6787601448796491 0.5858013986508122  
0.2709036707888977 0.6004387768489132 0.4122197861898392  
0.3659666414801366 0.6070605748120202 0.3281823112566294  
0.7077727371929587 0.4763684122283415 0.3160275199667922  
0.1927504244156032 0.3264029651967403 0.8104201456266924  
0.2086909491235858 0.8211261371454390 0.3981840957389220  
0.6970471852717560 0.9661875341601752 0.8829941988834965  
0.6924783451716103 0.3260486579155862 0.8892753846815256  
0.2063364949664576 0.4839430718030958 0.3953750842758300  
0.2022381672925625 0.9685390563013693 0.8095133981770847  
0.7055778047220196 0.8183070659476066 0.2990498322401067  
0.5945156183976050 0.4669367093323735 0.4156152094029124  
0.3044143187388206 0.3366130561924973 0.9111916290708665  
0.0964836804442981 0.8329620816103666 0.2969031287984538  
0.8144427358380462 0.9755743863649936 0.7945243843422213  
0.8050317821075106 0.3324844551294409 0.7883085498431709  
0.0961199818714115 0.4641612135877718 0.2901729682149957  
0.3168970020677261 0.9847305828517758 0.9017714761318457  
0.5955825303494837 0.8367279531588396 0.4015947682422705  
0.6016909858550755 0.5389294343565082 0.2452221848462529  
0.3007087334062138 0.2681602002621022 0.7378341586407456  
0.1014819480295160 0.7581570934704795 0.4637807065173258  
0.7899438715852779 0.0426004636819201 0.9648161647051211  
0.7997551591818324 0.2611919287835179 0.9578166823165601  
0.0941497113114388 0.5382916876284835 0.4578677559494040  
0.2900563141340164 0.0550686097234401 0.7371433666860362  
0.5942869565137168 0.7551417168992135 0.2431077188629175  
0.6078155085649358 0.4039988731514093 0.2416279572823113  
0.2894581994581386 0.4035667235734466 0.7389233211098464  
0.1105455133681584 0.8932803610481435 0.4741969614826536  
0.8037596659896683 0.9083093016196723 0.9635784326587121  
0.7937908015337478 0.3963656611841139 0.9616151241556726  
0.1115306495909152 0.4038519339126963 0.4672652700156906  
0.3133593394577773 0.9242244995854091 0.7202525961322652  
0.6066512640974056 0.8882755913677119 0.2162170023858860  
0.5250034888093875 0.4438908162523007 0.5794369641333214  
0.3789872881937157 0.3539893792007561 0.0732595392990600  
0.0250759613299540 0.8571272445491025 0.1342361139892266  
0.8772142239496272 0.9375466769094782 0.6293267482196775  
0.8773946033937533 0.3613773364632021 0.6289656153661066  
0.0162587990197471 0.4448067351170351 0.1344220381005644  
0.3720942387983499 0.9451694906798611 0.0762977880338464  
0.5295917410967081 0.8648622902684650 0.5675543061027875  
0.5198842925282665 0.3549162625205342 0.4265760986694919  
0.3889794760662187 0.4410054560569828 0.9201383169969146  
0.0189608864368484 0.9420939778224051 0.2920939606938776  
0.8764989606049617 0.8568805688480747 0.7916172757313578  
0.8782968637211728 0.4446122969221778 0.7890052071850383  
0.0150561005654831 0.3573756628430452 0.2894122300250377  
0.3546219726458813 0.8592768351977268 0.9241238538957395  
0.5187092184326844 0.9459673172568698 0.4036814856929650  
0.4633951570516709 0.4725221428647202 0.4063937868549297  
0.4332487467195864 0.3164148912368647 0.8985730674426967  
0.9660513838386982 0.8206095294976465 0.3065123428150130  
0.9471552844420320 0.9692980319785618 0.7909572744900727  
0.9363996891389939 0.3253639551079937 0.7992815368524822  
0.9676803726499076 0.4808063249678812 0.3146481583334215  
0.4461408523233074 0.9566782539200381 0.9155440619607211  
0.4647993102042532 0.8247049968750617 0.4047742946401542  
0.4815046052399463 0.5112209202931536 0.7388057928602511  
0.4263447436226292 0.2762324974863393 0.2176738235085432  
0.9807913334426533 0.7751091258149024 0.9915509222433786  
0.9180082831338752 0.0249124392341045 0.4920260707378337  
0.9132535318079409 0.2751253669466003 0.4874865620034730  
0.9780806066524776 0.5248033341242314 0.9858815971250348  
0.4168559415937995 0.0257402550794636 0.2169515111948783  
0.4974152769777550 0.7687032567668214 0.6974872314772931  
0.3986935712790046 0.4298739049565624 0.6332051883192745  
0.5060734169244560 0.3643394214166881 0.1278108122166283  
0.8983459461048039 0.8608838912194579 0.0828159323355504  
0.0027173308116901 0.9353158379451982 0.5689453547049795  
0.0015688600451658 0.3632276345601951 0.5616866870778477  
0.8901882297354076 0.4447530332066905 0.0775089359755449  
0.5003602671742949 0.9397460995584489 0.1277487441768391  
0.4050057816312028 0.8561185595403645 0.6258579549108039  
0.4947211937899757 0.3799906616537238 0.7462594266448337  
0.4098478751744204 0.4078242677703798 0.2492761152522916  
0.9905485014300233 0.9063117546180335 0.9556934413117681  
0.9051180296433977 0.8952942903268928 0.4459076225006411  
0.9014163527548178 0.4059809570848411 0.4470734650779592  
0.9830715477810269 0.3919275287354614 0.9588403324031244  
0.4084313966056167 0.8937357555737899 0.2525024340780794  
0.497778904355322 0.8966660013943191 0.7549488566226923  
0.3166975354312589 0.5303258764930826 0.6899401414832038

0.5939836600364119 0.2747843496979951 0.1976184647551255  
0.8121711862098352 0.7756812697088690 0.0017253501744189  
0.0904276438565728 0.0249290437101710 0.4991780708833916  
0.0928463806189720 0.2734879914960717 0.5045821566399076  
0.7969048501924155 0.5270791189424453 0.0065273417319950  
0.5885731735908772 0.0216138441944270 0.2116303102524226  
0.3064193468337162 0.7906861812139343 0.7260830214983137  
0.2786669874905774 0.4417525171574125 0.5507560320031504  
0.6293950894688518 0.3626640522154659 0.0562834242920255  
0.7709328095038808 0.8635629163699344 0.1399978240625221  
0.1222028812071026 0.9463200668599817 0.6538372300516334  
0.1193532002507858 0.3590956388427428 0.6522917934127439  
0.7649696091886233 0.4360145633528701 0.1444873009483016  
0.6209933450435842 0.9552970969977668 0.0463256474187681  
0.2815442495949871 0.8548471367542612 0.5565640456791163  
0.3336051556913887 0.4767088807956222 0.3770072821151279  
0.5632160703085446 0.3236665965408204 0.8954951222052506  
0.8355144145154623 0.8326931558836902 0.3046052166219568  
0.0748805746742358 0.9704367552480770 0.8366246366696032  
0.0650362394149610 0.3323849932685112 0.8296977192491962  
0.8380754825347423 0.4670626472757551 0.2983952419199761  
0.5698984508533715 0.9806577024202097 0.8647976045367726  
0.3356549462040884 0.8218888946793210 0.3785648130715886  
0.2634499037658868 0.3625844482819294 0.3888038554417613  
0.6252328659531361 0.4425277250668295 0.8936835590336096  
0.7575891146125171 0.9413748472463546 0.3038834623295213  
0.1364325796761216 0.8539331649676063 0.8002917472403931  
0.1329895493666060 0.4461333142489461 0.8048046169270169  
0.7633482906030016 0.3559612684876845 0.3084509372015520  
0.6182694806022956 0.8589780499817863 0.9048392175654262  
0.2729935476444683 0.9397075948187258 0.4012582160401594  
0.4106099308579013 0.5441189340512823 0.2612660736376450  
0.5017324839111430 0.2471447586332860 0.7651563187940540  
0.8915423627343713 0.7601042212774636 0.4418651514998714  
0.9911419407752918 0.0416756382703864 0.9426403598579254  
0.9922840833025338 0.2572298081158836 0.9465021763915245  
0.8856141270452147 0.5410815957520404 0.4420781782491243  
0.4723926641667258 0.0301834993901605 0.7556305679095543  
0.4183803819912701 0.7579445275252569 0.2538615839664759  
0.7026908364957760 0.2367221351974382 0.3020001535701613  
0.1910886865362491 0.5656476613551386 0.7659693799776799  
0.1964508847594507 0.0485580387994049 0.3814564325745095  
0.7034537072698408 0.7582096898294612 0.8884392776847524  
0.6932128850562338 0.5572736329695869 0.8862900220204543  
0.2057617362857370 0.2428119793354754 0.4060745319133394  
0.1955814757542036 0.7329461588694482 0.7878691395805324  
0.6983007730596784 0.0602405064343976 0.3110341409742470  
0.5882857168262630 0.2432829195771453 0.3946657386385035  
0.3017627563978106 0.5435804158014061 0.9078130813485802  
0.0785729037357775 0.0614075299782339 0.3047597139116004  
0.8201545341901456 0.7356988009439016 0.8097665626677834  
0.8136858085918403 0.5613007048275992 0.8131556364828914  
0.0920802545290180 0.2478124278962338 0.3073571940527200  
0.3004916399944108 0.7393171845304237 0.9096213219629512  
0.5837014070390215 0.0621681347240958 0.4039090265343936  
0.6076183533238058 0.1493290021676171 0.2543369467793555  
0.2993113126256706 0.6547077882216744 0.7541806986302845  
0.1162446638473084 0.1494783215853018 0.4431124211493329  
0.7760776464774876 0.6523553089577928 0.9508182700321663  
0.5271130236582318 0.2602687989483587 0.5689886696739406  
0.3750747317649697 0.5268466644630236 0.0734391190409043  
0.0156567085497757 0.0263182067067453 0.1368807436652028  
0.8769022085608196 0.7721835215881648 0.6387182357831226  
0.8707469068487185 0.5317789143025281 0.6391227192893683  
0.0221915919132902 0.2686383800271053 0.1401293390650615  
0.3743116156559482 0.7696532340441518 0.0683110951151518  
0.5134334529673076 0.0228673318084080 0.5659143539177565  
0.4558886806705205 0.2382525229715090 0.4046849066393298  
0.433424338774600 0.5656313549829635 0.9077539407618658  
0.9472424221492963 0.0552064843808067 0.3008832902613732  
0.9514630248386432 0.7463006741979205 0.7988989271469887  
0.9454534024712796 0.5598246135050723 0.7976425208898297  
0.9605244547373940 0.2361837226456434 0.3090911377672462  
0.4329671780432182 0.7528695455934695 0.8912371113266037  
0.4518739912360710 0.0622761538799774 0.4014690333436757  
0.4998996014616254 0.1411872863255313 0.6504675612918188  
0.4080358498140818 0.6491167314631553 0.1429515824518612  
0.9996895804436616 0.1486887023990700 0.0603405836495018  
0.8822332133875872 0.6516532090868841 0.5539742877937894  
0.4049080792055703 0.2344542900696810 0.6286693698118938  
0.5015250965982238 0.5542816489173287 0.1153541478032179  
0.8965237987017615 0.0655952884824932 0.0772605377940557  
0.9907953792441982 0.7294011701101510 0.5638746669194120  
0.9863453218897071 0.5704084954547961 0.5609779915037666  
0.8995980009133010 0.2355226569388556 0.0849587369284875  
0.5022053188005928 0.7392733083136414 0.1019277232262846  
0.3923099114767288 0.0688887085249984 0.6092840171892488  
0.2951284334211789 0.1602622062180949 0.6161797701360557  
0.5980531292062163 0.6473262431622387 0.1275777118883004  
0.7955462862800126 0.1526182029543921 0.0759161267292783  
0.0944294142419493 0.6470775839092611 0.5731120064427160  
0.2975983846035655 0.2831333621133828 0.5392541207708897

0.6210261481436306 0.5270203638258585 0.0484282546938300  
0.7844084196793811 0.0326136783504972 0.1646519847696390  
0.0984751553386417 0.7671045812540299 0.6628342086027345  
0.0901544693772265 0.5241396914650903 0.6574006718059691  
0.7839188583013823 0.2749660721857802 0.1546327728743656  
0.6272620836293749 0.7682863493751620 0.0504158605343615  
0.2745732868121901 0.0374173403872997 0.5397824131089057  
0.3297118505961287 0.2498623720105634 0.3495444502838003  
0.5639069850229927 0.5620782630240904 0.8738248062943035  
0.8227406504559068 0.0526392283003699 0.3575817043585151  
0.0754447837116464 0.7417630567591655 0.8589385937244727  
0.0716995549089291 0.5598138743751446 0.8510003250920352  
0.8303648723186373 0.2417311226248353 0.3373880223600344  
0.5749441146194221 0.7328093751677032 0.8726583819284329  
0.3245181719142180 0.0586719939397919 0.3541920789615605  
0.4026542908731174 0.1517072279868163 0.2734025427462830  
0.4855820028204751 0.6439291589210816 0.7695410979963744  
0.9017680431500752 0.1485848279494895 0.4295049708682843  
0.9899791051419835 0.6507214317493696 0.9287001934409186  
0.4228978248001295 0.5834890942411911 0.5736629944297146  
0.3830897454668274 0.7064253468187224 0.6024522253194066  
0.5112666783358586 0.6499680270870359 0.3214514370526509  
0.5101445246746362 0.7067116126560948 0.4937882278985051  
0.2303809840033690 0.6108421494163975 0.5768217395553754  
0.5830953650144544 0.6401310799812242 0.6226628410142303  
0.3430082703990442 0.6498941336727450 0.3470603601025339  
0.3060774717499427 0.6307767773021484 0.4366737136038553  
0.6276712270716766 0.4718061887208976 0.3039224390133519  
0.2723542113277106 0.3337307686706329 0.7982544231684643  
0.1289647017216901 0.8265461236026749 0.4091774122138310  
0.7757449632453128 0.97328580933580861 0.9026073181787330  
0.7724184218886655 0.3285986870554774 0.9007026552671059  
0.1265009436844908 0.4723264910622836 0.4037089829712748  
0.2805137307949758 0.9818919718575195 0.7918554099384449  
0.6257661943258986 0.8255631314876494 0.2889415314196753  
0.5258318152053019 0.4342708915059822 0.4583371608231771  
0.3763922911594066 0.3624807443737377 0.9513457894187815  
0.0264291767763484 0.8635286667916778 0.2562409393318074  
0.8787375768725073 0.9348205982421192 0.7516093664080580  
0.8744067247322241 0.3663145144438547 0.7506902408475626  
0.0233735736605121 0.4363104107721956 0.2554447305631398  
0.3724424225022273 0.9362910736814284 0.9541947716079363  
0.5276076556623767 0.8695230908722057 0.4462836856073696  
0.4739200381787187 0.4426659076337133 0.6743192753812943  
0.4305063570528539 0.3506274515606317 0.167026383779142  
0.9736668933725513 0.8499837302512735 0.0403272709156127  
0.9263136463257385 0.9482167959761337 0.5335786397474812  
0.9242094449827644 0.3510896420563377 0.5307377961872106  
0.9665914524803134 0.4516322682875787 0.0383364318805402  
0.4248301297848853 0.9511211774547668 0.1682710981622353  
0.4814708154993065 0.8451715732245780 0.6629319750273993  
0.3220205656467241 0.4522596211527384 0.6532831125083580  
0.5839057408160959 0.3512871445188004 0.1556266905762492  
0.8215379376700236 0.8515564670417876 0.0466865123906154  
0.0810725601711635 0.9504335976848182 0.5492294514068291  
0.0806080514197219 0.3498102908728432 0.5466513561425590  
0.8119825312553900 0.4511886857918325 0.0477041321332135  
0.5788401021458741 0.9514389949060583 0.1502766410781653  
0.3272443662646736 0.8546794879074411 0.6578957858873390  
0.2709109358156125 0.4396476686330729 0.4294392542338028  
0.6275245975815196 0.3645433079936920 0.9335372177627128  
0.7677503701469529 0.8647968652450579 0.2622803747560156  
0.1336122633575997 0.9340774478322257 0.7738540892207226  
0.1272357522970616 0.3669451782739654 0.7736723640768356  
0.7683742795834382 0.4332599055200055 0.2670475483971084  
0.6265589697960332 0.9392466329902762 0.9258341211080358  
0.2751705659627053 0.8605315627574442 0.4348814615229259  
0.4054035162890221 0.4726325699965106 0.3231258094148973  
0.4978525879001942 0.3182406380981495 0.8257147638131697  
0.9000503280580405 0.8283196678876839 0.3757606649891754  
0.0008363682939904 0.9710728305241492 0.8822998126188791  
0.9941142837937146 0.3278164437160375 0.8845422893781334  
0.8986803130897048 0.4730055855255318 0.3769333254547994  
0.4962935497753136 0.9653885586850173 0.8211326435419081  
0.4054200716032044 0.8259611328189942 0.3201409835875125  
0.6233704843929310 0.2269063827643784 0.2869157468276136  
0.1210568662151787 0.0709123402105909 0.4082349512797500  
0.7771197630469115 0.7306396429096882 0.9135705034481469  
0.7699727342811936 0.5741400231103524 0.9145735376849773  
0.1268449483849625 0.2286576045147203 0.4151213343826607  
0.2763295963232875 0.7291853296570147 0.7927351157940422  
0.6198496445223297 0.0728323013103515 0.2946061604285481  
0.5227353598821081 0.2742803581369444 0.4483793901746057  
0.3721571488022278 0.5193743164858673 0.9501867459484804  
0.0153269742039842 0.0212155035801403 0.2592666021952447  
0.8811976699568147 0.7777018177908006 0.7607603323428680  
0.8767275799454234 0.5244423419438362 0.7608524211635798  
0.0229275239028501 0.2774746210840022 0.2620977898397283  
0.3674544020213204 0.7793210551913177 0.9455867129311838  
0.5172964979428438 0.0240270779509366 0.4434961130799666  
0.4826374309286417 0.2209299339732125 0.6531820477731480  
0.4249574008831294 0.5690832267248319 0.1453840182008861



0.9751987252931591 0.0709627492957138 0.0539393263306354  
0.9110282986327163 0.7279507130428072 0.5497185753097987  
0.9066109296703397 0.5737916032621301 0.5492064836292020  
0.9778492244882442 0.2273508625142218 0.0579083036926627  
0.4256368219377021 0.7290859562574062 0.1388623002651465  
0.4689411591579135 0.0659319974838271 0.646245409440689  
0.3247373583971291 0.2361199933247443 0.6312981775408671  
0.5800810316274202 0.5674755650030032 0.1353397000782607  
0.8167999799340780 0.0735078500356802 0.0705517111052643  
0.0705082992503849 0.7260132751536430 0.5663087082960631  
0.0660582997703400 0.5696417188033542 0.5627040489845263  
0.8200877213542385 0.2306210249547975 0.0673707474026496  
0.5802594114341417 0.7271270265238067 0.1274974821128882  
0.3133926673732827 0.0804198532734948 0.6261539247226533  
0.2742553897667783 0.2840144588596088 0.4215681165627755  
0.6251885991137810 0.5219511434402322 0.9255632783405712  
0.7666335021171027 0.0219138945567457 0.2833379046926774  
0.1268075936661882 0.7739977268487938 0.7777840462792847  
0.1225192211694571 0.5244930664241512 0.7711666974860407  
0.7703633437097028 0.2771431624619283 0.2758948342607283  
0.6293651305558351 0.7787994089165874 0.9267505105453306  
0.2677558766822418 0.0207722942189527 0.4198373390647926  
0.4035658280598695 0.2294781275543352 0.3119530059771541  
0.4908034215668452 0.5694510763178580 0.8223071484697546  
0.8973209494658843 0.0701278975268044 0.3948053088136049  
0.9995377075908419 0.7288667714764491 0.8945210984169646  
0.9967876736030014 0.5729666962917741 0.8908546567485675  
0.9011194258374509 0.2263248075420248 0.3907397422429799  
0.3983485240184227 0.0739861563657795 0.3114879801040634

Structure TS reaction 2v→3

1.0000000000000000  
20.1473052208878016 0.0000000000000000 0.0000000000000000  
0.0000000000000000 19.7681594983396991 0.0000000000000000  
0.0000000000000000 0.0000000000000000 13.2309279702280005

Al Fe H O Si

2 2 10 200 94

Selective dynamics

Direct

0.2738081378656929 0.5726145268595673 0.7838818245133865 F F F  
0.4998613119858817 0.7302119019969808 0.8177459447522679 F F F  
0.3408412293012049 0.6308643369078979 0.5936120297515615 T T T  
0.4730147567329865 0.6707431523349854 0.6171784129878901 T T T  
0.4423450381529861 0.5973285194926774 0.4740182658665688 T T T  
0.4540877976426003 0.5883720375795534 0.3389556934826246 T T T  
0.4954269128713520 0.7491243925045410 0.4595239534458742 T T T  
0.4988627743965353 0.6720678313248101 0.432633325144276 T T T  
0.1987341393481969 0.6334421993111050 0.5898134720277568 T T T  
0.2329350791234148 0.6249786123704837 0.4806395976862561 T T T  
0.6063529687232716 0.6517029646612258 0.6887579985611794 T T T  
0.6045042739115374 0.6742065482875006 0.5748772577929131 T T T  
0.3824012448953340 0.6436059577658853 0.4003019640331189 T T T  
0.2991876014637427 0.5763743233276841 0.3616157166775551 T T T  
0.7028302738515038 0.4787634906245088 0.3117023599038546 F F F  
0.1926439875552148 0.3261158966738620 0.8084597108213813 F F F  
0.2091712072737977 0.8203821120810275 0.4017288558165006 F F F  
0.6967908124889775 0.9664325863450571 0.8840116887831755 F F F  
0.6926118611729208 0.3257929434361628 0.8917593519929454 F F F  
0.2048640647719964 0.4814808598589622 0.3929086857070203 F F F  
0.2026336940756934 0.9683986152289705 0.8093778424627729 F F F  
0.7070529961007210 0.8185545658402091 0.3021077943165977 F F F  
0.5897602846553056 0.4679608521345244 0.4141356519741848 F F F  
0.3043610852014353 0.3388891531547458 0.9072566622676774 F F F  
0.0978638800583269 0.8325972217871467 0.2976294967060156 F F F  
0.8141854545948704 0.9750228752406613 0.7954549981148347 F F F  
0.8048594112835730 0.3323808157324137 0.7893876948801761 F F F  
0.0933507178075033 0.4656418536176972 0.2918335911535905 F F F  
0.3164221232552933 0.9846138154496415 0.9047420332057712 F F F  
0.5985170541811300 0.8432360002254029 0.4050718496666335 F F F  
0.5917032718578881 0.5373788684896112 0.2445102990625045 F F F  
0.3011702257207460 0.2706993751921516 0.7348539105431726 F F F  
0.1009784931473163 0.7568550139626069 0.4642253635459994 F F F  
0.7904417865875075 0.0426628133376212 0.9648850449452766 F F F  
0.8002078927843357 0.2607949233117850 0.9587462956858346 F F F  
0.0958014442946364 0.5383456022694588 0.4612645467689873 F F F  
0.2901644571762105 0.0559528181342586 0.7391763799245439 F F F  
0.5933555664586549 0.7592029211040625 0.2497953402316710 F F F  
0.6048555246184080 0.4027669334105326 0.2427737787369750 F F F  
0.2868107465943410 0.4062373811654822 0.7344858451498482 F F F  
0.1095170298858221 0.8920540288255836 0.4754407514743519 F F F  
0.8028905900569470 0.9081001907867758 0.9656675293730430 F F F  
0.7939141942406565 0.3958960829052316 0.9631607837807508 F F F  
0.1102445078029177 0.4034155504619505 0.4675447894983762 F F F  
0.3159617201012281 0.9257357456717301 0.7237551266324189 F F F  
0.6109113982895238 0.8915197321631894 0.2188198543060977 F F F  
0.5244544870447712 0.4414419350287986 0.5790073899061525 F F F  
0.3776551892640256 0.3559531864877243 0.0705244667450060 F F F  
0.0275172914929982 0.8594176914526841 0.1339053778173067 F F F  
0.8770856498734219 0.9374041955085843 0.6297428894098047 F F F  
0.8754437615949939 0.3621607297350664 0.6282810974505821 F F F  
0.0175015597251402 0.4424441262191365 0.1327708016292419 F F F  
0.3725520414666619 0.9453440346161059 0.0781131832195427 F F F

0.5283265941579174 0.8662824983346837 0.5670082968349277 F F F  
0.5198036382431468 0.3530922634876532 0.4245608593011028 F F F  
0.3903022486094798 0.4412094880254216 0.9141861200051551 F F F  
0.0222206551561612 0.9432604938797979 0.2930323566165569 F F F  
0.8770815897778732 0.8572021257462978 0.7926870645294386 F F F  
0.8777023057071389 0.4447521106904446 0.7892013350033835 F F F  
0.0153219810804615 0.3570608844103234 0.2903254378015774 F F F  
0.3523746209322525 0.8579558214108118 0.9290437064457322 F F F  
0.5153293141954407 0.9479450066396424 0.4036332211275919 F F F  
0.4571673251208708 0.4672790580904618 0.4101786938648360 F F F  
0.4333951703305559 0.3158672096047042 0.8987067927245178 F F F  
0.9672784059927295 0.8226190984255908 0.3043627372425775 F F F  
0.9470383701097447 0.9698808744806797 0.7911424652829595 F F F  
0.9365277030779637 0.3257830714948879 0.7966406757224149 F F F  
0.9638603907594998 0.4793849633819676 0.3086174561110795 F F F  
0.4453308705181840 0.9544943941289290 0.9159454990411007 F F F  
0.4683873525144264 0.8240297928302809 0.4011765641805027 F F F  
0.4835239014384030 0.5141592634910239 0.7335695339591624 F F F  
0.4235455904081746 0.2712086465309085 0.2095954746984887 F F F  
0.9824032593172589 0.7754749524193940 0.9944169527288125 F F F  
0.9162248148346350 0.0257190102710467 0.4930178681276516 F F F  
0.9131649752370166 0.2755685792180671 0.4880582214967859 F F F  
0.9757053050281712 0.5249813634986538 0.9889324365445518 F F F  
0.4185994248933653 0.0226435415501811 0.2214196863682787 F F F  
0.4992897114727981 0.7689085375840747 0.6965453851348258 F F F  
0.3992497075323485 0.4303655648531191 0.6358304929037217 F F F  
0.5037599706770166 0.3634009666598033 0.1290518645603029 F F F  
0.9004775943006749 0.8634603177906826 0.0825691350304325 F F F  
0.0025672295728185 0.9370403883357312 0.56962742020843788 F F F  
0.000028099659062 0.3645378287215948 0.5624869204825984 F F F  
0.8907509312101283 0.4419586836566296 0.0797776599267053 F F F  
0.5007778949692039 0.9361991707669830 0.1302827776800370 F F F  
0.4043512525904518 0.8554601451133195 0.6265138740342238 F F F  
0.4957891872510203 0.3825367590359221 0.7503796947328993 F F F  
0.4049773746649734 0.3985365021674312 0.2545752952360090 F F F  
0.9928941025372211 0.9059200440293012 0.9536996389829540 F F F  
0.9061393307996610 0.8960649166103494 0.4455532583586930 F F F  
0.9002199463048015 0.4061466263276969 0.4458039420067834 F F F  
0.9831783752777739 0.3928928187512213 0.9555025982703853 F F F  
0.4069003388452259 0.8906969090076728 0.2524113096021807 F F F  
0.4975785068953087 0.8956483459360527 0.7556355811863753 F F F  
0.3179751465636755 0.5330258878850813 0.6829509255075337 F F F  
0.5922317350446349 0.2736431624340483 0.1980548262105088 F F F  
0.8172369336804550 0.7755764724704761 0.0012783058706418 F F F  
0.0912811403029394 0.0246735385713137 0.4987314471925544 F F F  
0.0904420209215573 0.2736666577021580 0.5046069390469938 F F F  
0.8007420368855591 0.5268188460844243 0.0043538018606100 F F F  
0.5854193027370016 0.0229230761913826 0.2111161977320748 F F F  
0.3054010097884188 0.7923175417263053 0.7283975956873050 F F F  
0.2828189801047145 0.4427913127228749 0.5444709551472258 F F F  
0.6279175937704551 0.3623988659429926 0.0581220588482338 F F F  
0.7736979845798260 0.8607098900333341 0.1422660158084526 F F F  
0.1225040253154077 0.9462712974485257 0.6538654926521517 F F F  
0.1177146097789432 0.3587966003516243 0.6528042231444786 F F F  
0.7647723473039605 0.4387612179103186 0.1443507475223953 F F F  
0.6203435961273769 0.9566745479869923 0.0469420605570150 F F F  
0.2791548831485784 0.8580459736361377 0.5616053786784150 F F F  
0.3304370030939978 0.4820391381269928 0.3661599149942631 F F F  
0.5635778194990095 0.3235576863857261 0.8964955369890646 F F F  
0.8366879734552199 0.8287032378428378 0.3087158426198897 F F F  
0.0750186912809028 0.9735317578346994 0.8353983998820453 F F F  
0.0650116822015434 0.3284881357123766 0.8304617474947165 F F F  
0.8331812552567754 0.4709107979662193 0.3039223895020200 F F F  
0.5693221329632934 0.9799328413923902 0.8651554625882127 F F F  
0.3377619502483000 0.8244959312707394 0.3895818417915464 F F F  
0.2684254243944366 0.3629564085014749 0.3841711827034828 F F F  
0.6261134621835822 0.4427713773176052 0.8965605415921019 F F F  
0.7628523485414007 0.9400198220096527 0.3050491370531603 F F F  
0.1341827732873497 0.8552884023890854 0.8031842253153343 F F F  
0.1302126934633066 0.4441285604175036 0.8082614443277194 F F F  
0.7608176924872510 0.3583149512640844 0.3073105002792147 F F F  
0.6184221053617946 0.8589426757344825 0.9076167344982693 F F F  
0.2705895415402466 0.9399951816117138 0.4030146299056980 F F F  
0.4210492378194743 0.5330102643866255 0.2502488066610624 F F F  
0.5022289430339058 0.2489256399677657 0.7634386743802679 F F F  
0.8994971526503051 0.7602577481539470 0.4444121422692149 F F F  
0.9900333429122554 0.0415154930526640 0.9439251463754559 F F F  
0.9885445642765234 0.2576872951467379 0.9471240416343960 F F F  
0.8893150749784340 0.5420545691821914 0.4426715992604713 F F F  
0.4713762696774637 0.0289610295583316 0.7565477649255570 F F F  
0.4098011596761708 0.7547398095765416 0.2607544698703208 F F F  
0.7021568631222550 0.2384118571422746 0.3027342500041357 F F F  
0.1893424578339875 0.5640492673735622 0.7744409187098711 F F F  
0.1967244670833281 0.0500786352357352 0.3814050870910037 F F F  
0.7036914003630130 0.7581881360256801 0.9013129265923965 F F F  
0.6944832517799284 0.5577571324170734 0.8891650892711311 F F F  
0.2043187762686287 0.2465889878457972 0.4060256219075882 F F F  
0.1960356151804703 0.7354057502550759 0.7977663160511881 F F F  
0.6971933302185107 0.0556146210616788 0.3108175684983578 F F F  
0.5875962272361974 0.2411145639787762 0.3944925289148813 F F F  
0.3037391365767661 0.5449003260407963 0.8990234751687396 F F F  
0.0782557522799721 0.0641188031748072 0.3057543960381182 F F F

0.8162913023084784 0.7381587674140349 0.8077874068218662 F F F  
0.8123037321853772 0.5611989065985910 0.8098843552358801 F F F  
0.0910425282869269 0.2466492363499597 0.3074815955612635 F F F  
0.3056326835999883 0.7346975114823522 0.9080746396828872 F F F  
0.5834278275696576 0.0626407116664804 0.4042780597502471 F F F  
0.6099284059306385 0.1485949088063165 0.2537571484928236 F F F  
0.2955665987771781 0.6560943978740994 0.7452566780946697 F F F  
0.1175288928473819 0.1502943537433765 0.4455328064810331 F F F  
0.7795304130843519 0.6522073041634968 0.9508279576941945 F F F  
0.5257049952280255 0.2586990831726368 0.5666254358623988 F F F  
0.3748707438380734 0.5257160098770441 0.0668310497341835 F F F  
0.0155048158359179 0.0272244944117119 0.1380401136934282 F F F  
0.8789484068583988 0.7724574230464114 0.6399116135837914 F F F  
0.8729428165306103 0.5313519672256533 0.6387473918673265 F F F  
0.0215048652219707 0.2689715830705239 0.1400574155515741 F F F  
0.3750084885119094 0.7667199683360622 0.0704887997592749 F F F  
0.5133369347316687 0.0236837750104897 0.5670152223310581 F F F  
0.4549156624181023 0.2378200655156419 0.3995190832215272 F F F  
0.4349005223986566 0.5659664410764975 0.9037267262636774 F F F  
0.9472049315720241 0.0545775194871325 0.3025115478528377 F F F  
0.9482508538328034 0.7445405512119763 0.8042285335728678 F F F  
0.9438857979159678 0.5609060213066002 0.8007852402543492 F F F  
0.9594316233296141 0.2365779305001965 0.3086939490005847 F F F  
0.4366148992246366 0.7570612072793352 0.8934770324629824 F F F  
0.4516394690026715 0.0655393366610681 0.4041011166197066 F F F  
0.4996450453456731 0.1409067026030044 0.6540736751534055 F F F  
0.4006491670408536 0.6457600557664804 0.1498096033754379 F F F  
0.9996743394828229 0.1490893948224254 0.0600606817799232 F F F  
0.8838321003638683 0.6521000144608138 0.5554480006582949 F F F  
0.4046868034537781 0.2336180756772492 0.6281499533596389 F F F  
0.5011875937342722 0.5641048493554237 0.1029162467658864 F F F  
0.8961091783367934 0.0668825293095310 0.0790484128694544 F F F  
0.9942463445439387 0.7262416539534726 0.5732112465617760 F F F  
0.9887302212862323 0.5728340199123991 0.5636068120159479 F F F  
0.8986521437608843 0.2343053020337535 0.0884666748082097 F F F  
0.4991852448070446 0.7325582033354792 0.1153643490376695 F F F  
0.3918751489336856 0.0694545630522256 0.6105274357215578 F F F  
0.2943268249164888 0.1607491646495944 0.6168978817560244 F F F  
0.6016505040637909 0.6488239473563482 0.1372900174787262 F F F  
0.7940254651513925 0.1525465876762482 0.0773910128780173 F F F  
0.0996477924435553 0.6458624184706352 0.5785220222821081 F F F  
0.2986744365610576 0.2830291236869300 0.5363517821892501 F F F  
0.6214717039993403 0.5290219654893988 0.0495739751898583 F F F  
0.7837585836189973 0.0317931190889595 0.1641553270865828 F F F  
0.1040035526509087 0.7675131184409807 0.6630000403249880 F F F  
0.0900676346996150 0.5222054072822360 0.6607028654871669 F F F  
0.7830780245741877 0.2758615403689859 0.1550222296416237 F F F  
0.6203696133889167 0.76983365992776033 0.0557116788930898 F F F  
0.2739765216453591 0.0377969519141388 0.5413697900674777 F F F  
0.3284112903566765 0.2470692850021621 0.3466597137549599 F F F  
0.5654978634075576 0.5619965312269031 0.8724561096519707 F F F  
0.8220475918260917 0.0546522842603636 0.3563898307610245 F F F  
0.0735922980336241 0.7417215039722365 0.8570016172779020 F F F  
0.0697214937670410 0.5578610819872907 0.8540038295401047 F F F  
0.8295992220885822 0.2448691805478447 0.3386351285816005 F F F  
0.5773853603198944 0.7326895509322711 0.8722442413679090 F F F  
0.3247778442184455 0.0573940852263917 0.3558037630242907 F F F  
0.4014375663370373 0.1492937187270797 0.2702220841462477 F F F  
0.4877554210270247 0.6460224963238304 0.7694690122243344 F F F  
0.9007392029866850 0.1494613981105033 0.4288750734061040 F F F  
0.9903177218446828 0.6505609518574573 0.9325862697433749 F F F  
0.4292709780899884 0.5910295799337604 0.5657923278487189 T T T  
0.3876924631040524 0.7103818351837603 0.6113150022372764 T T T  
0.4493462153515750 0.6220323373894914 0.3926521302194388 T T T  
0.5162927574678946 0.7069218100907264 0.4840854662992413 T T T  
0.2397457156761291 0.6213398757060560 0.5544706194184030 T T T  
0.5840309397516776 0.6440903855563818 0.6243126527861236 T T T  
0.2844368024612152 0.6241506702249069 0.3674984085633994 T T T  
0.3347068942031797 0.6544362856547679 0.4335184937313201 T T T  
0.622791346467463 0.4720215590485424 0.3022235924613739 F F F  
0.2717431374408932 0.3359010605013992 0.7947561181330656 F F F  
0.1291978474197677 0.8254616996836788 0.4106780674239801 F F F  
0.7755907156415631 0.9730236166697352 0.9036702245987556 F F F  
0.7726683489353405 0.3282675380429296 0.9020349297654562 F F F  
0.1251447366207685 0.4720041491126494 0.4044997837954867 F F F  
0.2809054151431027 0.9827388289770198 0.7941274567750725 F F F  
0.6274203543180406 0.8281861865272049 0.2923518860483583 F F F  
0.5231476259761010 0.4319269216529023 0.4581367322618419 F F F  
0.3764057967453596 0.3634382188199581 0.9482578576472136 F F F  
0.0286734444073531 0.8647904850681556 0.2560830994887979 F F F  
0.8787615488803198 0.9349514313353140 0.7521004817361501 F F F  
0.8737407268464707 0.3666169052718189 0.7502291508073569 F F F  
0.0221011884702165 0.4357051656624975 0.2543727929750901 F F F  
0.3716678409821412 0.9352256902354057 0.9563628676491689 F F F  
0.5279960678534010 0.8719900088298118 0.4456521667133231 F F F  
0.4746764857665937 0.4432349661871768 0.6754466695339261 F F F  
0.4279334122475618 0.3471796538484568 0.1649375405561102 F F F  
0.9757637793526328 0.8511249555125033 0.0405545560943068 F F F  
0.9260668214077654 0.9489996561829059 0.5340038966212433 F F F  
0.9228817614369973 0.3518666423492718 0.5306183950672718 F F F  
0.9666388529770416 0.4506060398053080 0.0383025262454169 F F F  
0.4252354042086992 0.9486395592448105 0.1703851651463140 F F F

0.4810904735810482 0.8456000008921691 0.6623168054535640 F F F  
 0.3224167315050437 0.4540209319979525 0.6501710961540397 F F F  
 0.5817503590426938 0.3500932935932539 0.1563931871201447 F F F  
 0.8237436685847968 0.8515263462961400 0.0475906529142733 F F F  
 0.0811603702587007 0.9504179732505165 0.5493901142244937 F F F  
 0.0788195885060929 0.3499479455399666 0.5473203934844122 F F F  
 0.8130769837100544 0.4510879875445895 0.0481450014077893 F F F  
 0.5789170090106310 0.9516237361693172 0.1514642247065510 F F F  
 0.3268433557096131 0.8561478290210474 0.6605246884852107 F F F  
 0.2712805140663264 0.4402780685660801 0.4242628496165750 F F F  
 0.6276701384484014 0.3645270759971524 0.9353606936857730 F F F  
 0.7703156604722210 0.8628653109194602 0.2646054288954574 F F F  
 0.1333124686456770 0.9350978471896951 0.7742406366657946 F F F  
 0.1258913301801314 0.3656264893488839 0.7743645133535821 F F F  
 0.7653233346657728 0.4359474616017209 0.2669555980447171 F F F  
 0.6263250087143959 0.9393923070829615 0.9270104961871297 F F F  
 0.2743779098464643 0.8615423611814066 0.4395208939078188 F F F  
 0.4039055198432067 0.4673991011365146 0.3190856428020581 F F F  
 0.4983233875636941 0.3188710332786187 0.8264902634309337 F F F  
 0.9027467961953022 0.8282055760861979 0.3769049670960101 F F F  
 0.0011265800108902 0.9718227321152213 0.8819465661954595 F F F  
 0.9932838215191424 0.3273870785148603 0.8835038231759640 F F F  
 0.8971103829015377 0.4736791078854168 0.3765963194315702 F F F  
 0.4956732166811051 0.9643227768006213 0.8221127815680873 F F F  
 0.4046758910860078 0.8245934170839107 0.3236991223313694 F F F  
 0.6233259847959758 0.2262959281546344 0.2868420198855048 F F F  
 0.1213640872744008 0.0719774691555770 0.4089661469132508 F F F  
 0.7783620452919138 0.7310499078445858 0.9161497203516475 F F F  
 0.7717516062934777 0.5742566298430276 0.9142368087908750 F F F  
 0.1259792534034787 0.2294741970286367 0.4158383631989864 F F F  
 0.2764815590578920 0.7296054980104856 0.7933932133560333 F F F  
 0.6194708583972215 0.0718728418695207 0.2944907555485869 F F F  
 0.5216085391168548 0.2724048983485474 0.4460740729910739 F F F  
 0.3728802804662763 0.5197427730750093 0.9432025455311503 F F F  
 0.0159408600971460 0.0222345635839858 0.2604406810579789 F F F  
 0.8800472886388135 0.7778999746842885 0.7621630334229081 F F F  
 0.8766076680028760 0.5245781830291136 0.7607528414533178 F F F  
 0.0223182542133884 0.2772525304046098 0.2621569033405322 F F F  
 0.3693243300584967 0.7783128611459489 0.9483794651610609 F F F  
 0.5165579470455981 0.0257321109780548 0.4445321928609403 F F F  
 0.4822913171176211 0.2205798144628872 0.6530994475870031 F F F  
 0.4243078177609050 0.5681195182430940 0.1387446218338155 F F F  
 0.9747465962404149 0.0714435810727636 0.0549651147295407 F F F  
 0.9149127069139880 0.7276097895330764 0.5532543038496982 F F F  
 0.9090940749934617 0.5745211991953028 0.5503351128298419 F F F  
 0.9766054068373151 0.2273897350753344 0.0588154254647293 F F F  
 0.4216228393380135 0.7251174466350250 0.1477995280211530 F F F  
 0.4684158345873684 0.0657882611017087 0.6479317111832685 F F F  
 0.3246109464166835 0.2365193086303137 0.6297298865727328 F F F  
 0.5790328202215775 0.5703110069099466 0.1336702242456980 F F F  
 0.8162957790813437 0.0736246096502029 0.0711655788521668 F F F  
 0.0741629716763370 0.7246858904760813 0.5695161662456059 F F F  
 0.0683217335767878 0.5692794068309794 0.5668931038144365 F F F  
 0.8193063943914609 0.2303641175206081 0.0689911602870410 F F F  
 0.5781869992968183 0.7274732828223733 0.1383902219318713 F F F  
 0.3129170538284072 0.0809219218851069 0.6275577460866302 F F F  
 0.2749218317773412 0.2841410859238280 0.4189513046591244 F F F  
 0.6262257554784014 0.5225200314682894 0.9267441096281317 F F F  
 0.7672005719366481 0.0206233885992546 0.2831463766033906 F F F  
 0.1271230796938028 0.7750536465072599 0.7805846925803692 F F F  
 0.1216732159249077 0.5230406937807714 0.7753183545804347 F F F  
 0.7694489720561748 0.2792915511833698 0.2762322580302694 F F F  
 0.6285352652257998 0.7790233033522398 0.9331017332209584 F F F  
 0.2671362708715748 0.0210418114812754 0.4213278064430952 F F F  
 0.4021477168267396 0.2270992221937220 0.3076630170873500 F F F  
 0.4929870395948655 0.5706767841681852 0.8198878514266426 F F F  
 0.8965869360296779 0.0707828446744472 0.3950613804746652 F F F  
 0.9987917588181361 0.7285339245181177 0.8971325013541360 F F F  
 0.9955431256762779 0.5728467270519033 0.8939679461514487 F F F  
 0.9002942062048120 0.2273429878063240 0.3908721667287480 F F F  
 0.3983702748296878 0.0726640713277220 0.3126671027327177 F F F

Structure 3 S=10/2

1.0000000000000000  
 20.1473052208877697 0.0000000000000000 0.0000000000000000  
 0.0000000000000000 19.7681594983396742 0.0000000000000000  
 0.0000000000000000 0.0000000000000000 13.2309279702280254  
 Al Fe H O Si  
 2 2 10 200 94  
 Direct  
 0.2732120169057978 0.5730842968915340 0.7801831828445791  
 0.4992030636958315 0.7304533376104014 0.8183714279306817  
 0.3406293394044332 0.6254658262172473 0.5831968432145470  
 0.4742742361764358 0.6728715197342480 0.6160452507982840  
 0.4462810623261422 0.5573907195278431 0.5182897095273369  
 0.4880377055493058 0.5881166228037065 0.3362047420907876  
 0.4933652625477167 0.7491501375974361 0.4597058990244507  
 0.5043131914570039 0.6733623509973299 0.4280742869988379  
 0.1986081554176813 0.6392252687290950 0.5742631827124665  
 0.2401244333618331 0.6338688856461402 0.4684673786882759  
 0.6075825901753406 0.6502201142031163 0.6874326086444947  
 0.6063836357789004 0.6755100150323523 0.5750235960234075

0.4251450925535727 0.6296712028475786 0.3700379006664074  
0.2902448627078779 0.5722872266631610 0.3443661492102672  
0.7005210061797696 0.4783873138037600 0.3091692391147183  
0.1927142324872307 0.3288696270010259 0.8095199224248877  
0.2089540101528582 0.8205520391171286 0.4036957201560591  
0.6960070198457945 0.9670179272162035 0.884821261705740  
0.6922514376724433 0.3267104813235697 0.8895037289851405  
0.2042963649392110 0.4816685650055006 0.3927957683399425  
0.2026871556698981 0.9668550024339493 0.8107777956986431  
0.7074884039797324 0.8186274086923573 0.3031357962217351  
0.5880362149770489 0.4673439375611168 0.4135920137241688  
0.3050158369556742 0.3426529246524908 0.9061897114989472  
0.0981763201440318 0.8333103051060118 0.2980609195917960  
0.8134347372812174 0.9751366844725334 0.7956232659034463  
0.8047092124309466 0.3334518103375608 0.7887011890896908  
0.0919725158261539 0.4666374390303434 0.2922769587871947  
0.3160567429195800 0.9847324299540470 0.9071451557545743  
0.5987013800336085 0.8439890028531409 0.4055831545142125  
0.5879035705379791 0.5365546450486613 0.2452442278025096  
0.3010959141067744 0.2746117994570796 0.7332855534424387  
0.1001446113157389 0.7566842922866199 0.4637475081728933  
0.7900631172663668 0.0429997271165951 0.9647252854148252  
0.7999230576834712 0.2621824854415528 0.9583973312512920  
0.0959584620642098 0.5389910682489458 0.4617293481066773  
0.2895503764446939 0.0558237759602958 0.7419300237553803  
0.5938836347908638 0.7588533345833505 0.2522254926980024  
0.6020343867406511 0.4016605071325764 0.2425720283472487  
0.2852845980709381 0.4098799039974168 0.7334342098596682  
0.1087377628404001 0.8915031447570931 0.4770151519949177  
0.8021570806453340 0.9083903888368213 0.9658990061836247  
0.7927035464790084 0.3973699338845531 0.9619816305817362  
0.1095824739138049 0.4040379908621359 0.4675314739277356  
0.3171463849632232 0.9258448751809456 0.7264857556824255  
0.6113784247224527 0.8908359907112466 0.2184971670643575  
0.5234094504831522 0.4449908501117424 0.5800677029979167  
0.3781628793480660 0.3574804096348944 0.0708609048360066  
0.0272113845108644 0.8592049718235192 0.1346856970061269  
0.8769122039715118 0.9382245477710559 0.6304315182931743  
0.8757123237628855 0.3628167928755771 0.6284195405802100  
0.0172873034914059 0.4426257730116847 0.1325920390087422  
0.3725725380356114 0.9456372792761828 0.0797367313721303  
0.5278271774719880 0.8657316369311578 0.5669668430323630  
0.5151984652624096 0.3542755792259137 0.4287458054151554  
0.3940979433674593 0.4421591288059716 0.9143293459614593  
0.0208611015732644 0.9429886973312691 0.2936032727108427  
0.8773350289048781 0.8577853491567446 0.7932406369188905  
0.8788236003592680 0.4451348234624090 0.7895216013170031  
0.0142271288212782 0.3578203442750699 0.2908412298498107  
0.3507884482324993 0.8577762106511440 0.9311014000615816  
0.5143641661919686 0.9478467692636565 0.4046350382452717  
0.455286928785224 0.4717252645173300 0.4131746405271389  
0.4331757949473328 0.3155776077488138 0.8983930653587587  
0.9676786533572530 0.8219454564391023 0.3059818383291441  
0.9464557847510328 0.9707778441586310 0.7924191331411067  
0.9361050542078694 0.3253751722452660 0.7971960900935545  
0.9620089475333493 0.4799939208153233 0.3070668866767797  
0.4448537704694085 0.9528500072142851 0.9170025192366085  
0.4685297706001367 0.8234637627666429 0.4001209428151943  
0.4853410344468484 0.5122923354651149 0.7406088320538021  
0.4236778539383525 0.2696951398757740 0.2064467608515661  
0.9822056659704684 0.7765946912927661 0.9939007361365536  
0.9164707455683465 0.0262044862315586 0.4934286140451199  
0.9124523940325707 0.2760839056348965 0.4879124433117660  
0.9758965519800750 0.5243591453182932 0.9876298694937354  
0.4186173838899814 0.0225781543215928 0.2235572890478250  
0.4982965230352276 0.7684439399192325 0.6961743407713954  
0.3990640115293186 0.4329264024338290 0.6383060467640747  
0.5050185381642975 0.3598667166077401 0.1228296412387716  
0.9003786179885150 0.8645727321560904 0.0823999336476482  
0.0024812822173532 0.9377142940630386 0.5715606468422468  
1.0000619690229868 0.3640764839645889 0.5624604544355405  
0.8909310512836609 0.4410109079867126 0.0783958764865775  
0.5007227283489033 0.9362212311753249 0.1327086664501952  
0.4037387819764719 0.8549553933732318 0.6260916167236231  
0.4957556768171900 0.3801761160862716 0.7476078632815284  
0.4129612485507177 0.3965961829765750 0.2568671156377690  
0.9935020542348078 0.9073429004082302 0.9548744175855172  
0.9067035844513138 0.8963650497394623 0.4466641482379018  
0.9004212539373426 0.4068279286859935 0.4461234607769950  
0.9842728057766360 0.3921470391118109 0.9553239691227396  
0.4059411277128403 0.8909304690276374 0.2540022672405354  
0.4972539365807189 0.8951324915640011 0.7557129573954644  
0.3144124870849119 0.5354214141349105 0.6730089611093309  
0.5945009383595460 0.2725594539620382 0.1950229324656493  
0.8177424164606675 0.7760404463373179 0.0013989476978056  
0.0911096614159719 0.0241012543026972 0.4977193002334203  
0.0917587680812571 0.2741677599052409 0.5050129561286812  
0.8019622700138747 0.5277649599341854 0.0056067807450805  
0.5857318226461774 0.0223499664169516 0.2146519164322261  
0.3064330912987812 0.7919018728272813 0.7292572740090797  
0.2847647207966174 0.4400363309245536 0.5402608269837961  
0.6298813995094352 0.3632381536250882 0.0575571293368860

0.7735602945025418 0.8607471704038366 0.1424639719172746  
0.1228066088357296 0.9473490099652977 0.6544228771233437  
0.1178293154536378 0.3596731239785803 0.6529405246479363  
0.7650494492466700 0.4388616463048597 0.1440739413645229  
0.6197090840086311 0.9583331816973725 0.0482503705861154  
0.2776423912618233 0.8595957775852821 0.5647872974855835  
0.3284159220161331 0.4739970260128543 0.3577099121486603  
0.5632708288346884 0.3244272363456885 0.8974342576281308  
0.8371930120378488 0.8304363088678672 0.3087160800618011  
0.0747544042438167 0.9754409256657350 0.8354007426058160  
0.0647965191082106 0.3261888663566442 0.8293512055761431  
0.8310957571568928 0.4708269728368107 0.3059597606288308  
0.5684392588518165 0.9797797601935956 0.8659760764996075  
0.3377639944128645 0.8266163564667693 0.3943789111330062  
0.2606135841301306 0.3596691252091730 0.3841343580120347  
0.6253047455646208 0.4437824236184362 0.8964678820707487  
0.7616383451316413 0.9406718388205983 0.3043196103892942  
0.1307426205229003 0.8558696514243143 0.8038468681682663  
0.1254568401860396 0.4443120507350746 0.8099739720111363  
0.7587877953789146 0.3581470480969925 0.3067263646207340  
0.6180329866477037 0.8595160910591806 0.9106272746627658  
0.2680162923575339 0.9410611345778889 0.4060032008793544  
0.4185200667177994 0.5317175553901980 0.2486109390788740  
0.5034074413443532 0.2479217326949716 0.7643830981115440  
0.8983358363399722 0.7606803434198629 0.4450763262513568  
0.9895182666071123 0.0429366869057018 0.9442946761971801  
0.9881287335439225 0.2569202115293852 0.9476110333549124  
0.8881413763960095 0.5426388580036091 0.4425368281336898  
0.4699501304829535 0.0282154688048850 0.7581565058559572  
0.4051301901450005 0.7549865666385007 0.2625206088546200  
0.7023197808723707 0.2370965001846486 0.3037501789383543  
0.1891049943840964 0.5615638587766333 0.7727875474953227  
0.1972672911302386 0.0533827691135792 0.3833699409609844  
0.7027512958021106 0.7583318614461850 0.9055850062036456  
0.6951150070598129 0.5576733743261143 0.8918208212745808  
0.2047222940319189 0.2400829317053641 0.4074167970449104  
0.1955801950189981 0.7376978576554087 0.7989350474908372  
0.6976385120229028 0.0571952443287631 0.3126691987615437  
0.5868741993986843 0.2453815320314797 0.3927969294650906  
0.3052847501530362 0.5425328542317572 0.8922651039786094  
0.0798305088252172 0.0622564260753456 0.3035774012766858  
0.8142100423910759 0.7399566491760419 0.8075515652930726  
0.8125046939701523 0.5610924232150584 0.8104999460744552  
0.0915612448182775 0.2485724915106851 0.307620222333019  
0.3051681198494045 0.7342518780476690 0.9086898278448314  
0.5843773541883016 0.0614681440945004 0.4080428341141544  
0.6081510766535683 0.1484828599881891 0.2578663268083108  
0.2937799274370445 0.6564764974366846 0.7451635528345965  
0.1125289037953671 0.1500050026724101 0.4448276558262635  
0.7801549701128730 0.6527978651160514 0.9506924956038555  
0.5253069917555413 0.2571038150541523 0.5660414899993276  
0.3730509380168445 0.5267400678663493 0.0651503774769621  
0.0145629532566385 0.0265118578621780 0.1379003593973497  
0.8784127008303835 0.7729766106941024 0.6404338994038467  
0.8729464413997070 0.5315792652462862 0.6388529442703984  
0.0209622382967132 0.2698517183424270 0.1405197918498030  
0.3746831217752854 0.7669724246802694 0.0713176275057390  
0.5122347967454708 0.0227320519700624 0.5689111196579300  
0.4541039413532720 0.2382105976792828 0.3980958498780519  
0.4352936579851644 0.5685077062202081 0.9052103189740220  
0.9484856257902533 0.0560884723562754 0.3036664525259875  
0.9464302654698676 0.7438776689207058 0.8052994487148623  
0.9441025983988098 0.5618057875605799 0.8003277687696915  
0.9600828496871423 0.2364706538689978 0.3097709534130939  
0.4359440165798834 0.7577604639207053 0.8936414496595703  
0.4528452448813018 0.0667816440679352 0.4051290740007337  
0.4992149403650730 0.1401176043054850 0.6556285637265035  
0.3969582180382222 0.6458422160959243 0.1488186154383047  
0.9988010028632734 0.1493831152162236 0.0631783379586613  
0.8828532814981636 0.6525594082185431 0.5560759187394820  
0.4047908306598429 0.2339190232984541 0.6304560534457671  
0.4991395160679130 0.5653209303797968 0.1028960254764645  
0.8953189065778525 0.0670463134658970 0.0798208495792862  
0.9936458304511909 0.7262834285985041 0.5732984947205600  
0.9880966422141317 0.5738195040012659 0.5615962618212181  
0.8979353345098939 0.2353861469485182 0.0889786944205900  
0.4974841593064528 0.7319392265224823 0.1210566630479902  
0.3909989824325831 0.0697518373324044 0.6122157401294005  
0.2939844108478059 0.1615300314868827 0.6219095315119429  
0.6008122118562683 0.6485325601188090 0.1388925483680613  
0.7936625667053203 0.1532719893386006 0.0758087527859404  
0.0994789269863865 0.6461093313750697 0.5785193318370078  
0.2996962479149681 0.2814675619443625 0.5340950128064086  
0.6202823081161857 0.5287814675634189 0.0514276434933193  
0.7824765247404499 0.0329889762596228 0.1640322010582247  
0.1035213051430773 0.7678887745974898 0.6627129451141786  
0.0880261097612295 0.5224804693674530 0.6610021757020758  
0.78172459709096963 0.2760481351314694 0.1545307440078464  
0.6176614718316227 0.7697980840392614 0.0577361959478237  
0.2728484334361968 0.0390116815794731 0.5442273766806892  
0.3279319081424899 0.2486122399540070 0.3431193251855997  
0.5664847533623155 0.5644906129879917 0.8749715009832305

0.8228954209887156 0.0540709243220303 0.3556110391869833  
0.0723564248197866 0.7408703876062608 0.8558077689301802  
0.0698494939751664 0.5606645933557823 0.8539418652933716  
0.8299889093927401 0.2458937411997807 0.3371710598626903  
0.5767089467155432 0.7338895854983933 0.8726340529315780  
0.3256554753498634 0.0568418496251306 0.3596689938654793  
0.4004239802456391 0.1489246614284674 0.2709191533387068  
0.4887898306778918 0.6463328115360827 0.7691101654610343  
0.8997100798180211 0.1499709924463008 0.4291136134649305  
0.9889853020335427 0.6509464467390291 0.9345128717284874  
0.4353766609170161 0.5855906658425334 0.5765705076316721  
0.3883067527049083 0.7050697480321576 0.6072791549742820  
0.4729648467003325 0.6340976951282142 0.3494102114425583  
0.5154699971821989 0.7078683906757681 0.4854533817517572  
0.2425348914837081 0.6422394298336639 0.5427490359318035  
0.5856302286458246 0.6441202215826617 0.6223440150124460  
0.2925875742557940 0.6193357729978983 0.3689536149670605  
0.3506760258241326 0.6147580306278625 0.4349303823830472  
0.6205311021115133 0.4710734059601270 0.3011014288031044  
0.2715930673243689 0.3392833323740749 0.7942806448889174  
0.1288958812817079 0.8254621403397686 0.4114501192775210  
0.7749029385653653 0.9733085208581329 0.9038791351979946  
0.7722529431297880 0.3293668698842523 0.9010840892357724  
0.1244698918886528 0.4725375579829339 0.4044941298217101  
0.2808243409853154 0.9823663040035528 0.7963786705368661  
0.6277883064586155 0.8280596428109218 0.2932058973669005  
0.5211645890876666 0.4330696344151322 0.4596470137188239  
0.3775706385742600 0.3649016829367115 0.9482376716556625  
0.0284836396174297 0.8646030654922019 0.2568245290603920  
0.8784800543662338 0.9355712360078574 0.7527981502038886  
0.8740301741387625 0.3670796682068149 0.7503252417794065  
0.0209472082845753 0.4363732820950395 0.2543140421387712  
0.3710569528965414 0.9347471288098459 0.9582004150864014  
0.5276581210450985 0.8716901459139307 0.4455909738931552  
0.4747644942909446 0.4435591924166019 0.6782512822261879  
0.4297879607023263 0.3460285415696130 0.1632495264217234  
0.9757551527268845 0.8520310701292713 0.0407459960373616  
0.9261803218302685 0.9495707898418095 0.5349725568316976  
0.9228590076730777 0.3522289279788272 0.5305768739529448  
0.9669249100065840 0.4501099503224750 0.0373722792413549  
0.4250489680720426 0.9486793035853658 0.1722097955599256  
0.4804434543917658 0.8454424612465505 0.6621298357120954  
0.3215067293960928 0.4551453377454466 0.64688355051864086  
0.5825786584469298 0.3489038982311803 0.1539526637860525  
0.8236730260763577 0.8520287196748134 0.0477519178167561  
0.0810333905877170 0.9505102386892622 0.5502466767100420  
0.0789932760142053 0.3502664746469606 0.5474454614856242  
0.8132456869120963 0.4514604001321773 0.0478358840248155  
0.5789167595905544 0.9517153258219401 0.1532354001965419  
0.3265493078855601 0.8563921506072345 0.6622776391417384  
0.2694495274602363 0.4371549557519521 0.4209615762050402  
0.6277812343990249 0.3654342623358286 0.9347111466097859  
0.7702209492044018 0.8634275006118127 0.2647815751143729  
0.1325737308450078 0.9356091269495522 0.7749505004480682  
0.1247575043339121 0.3659721436414538 0.7748105834960849  
0.7639173916657095 0.4358033434467619 0.2665635590262674  
0.6256744293596467 0.9400722839473389 0.9285867139061132  
0.2732906075617095 0.8626980716287057 0.4426501482174361  
0.4039887608955977 0.4666223040265309 0.3177694869004016  
0.4984570407561136 0.3181011882353102 0.8267777316443486  
0.9028319977434522 0.8286554403813443 0.3777559655460521  
0.0009904633615754 0.9731335825698108 0.8826066983252920  
0.9932926273059501 0.3263885993641685 0.8834361337377438  
0.8959502612141884 0.4741494541175824 0.3766976953518267  
0.4948829049698182 0.9634970466457715 0.8230937181060481  
0.4033189498321431 0.8249009022488953 0.3253218246504936  
0.6232671474046736 0.2265136362338311 0.2870776504866666  
0.1207196887995154 0.0720077120990013 0.4084923683584332  
0.7778075148039069 0.7318013394638602 0.9170406426957135  
0.7724567123118615 0.5746837333911970 0.9152115676096574  
0.1252427554904809 0.2286605365719935 0.4159613689059845  
0.2759147904974028 0.7295530639489739 0.7937789020013480  
0.6194631894377162 0.0717520292968383 0.2976894920596195  
0.5200342604728582 0.2731203432326233 0.4462147589291436  
0.3738289329534081 0.5204632934593072 0.9417650783102928  
0.0159906347348810 0.0218946090603375 0.2603043307256768  
0.8789898467221275 0.7784484004065094 0.7626849933561416  
0.8769521653767766 0.5249567843387835 0.7608773851592684  
0.0222172359637550 0.2780911418318739 0.2626524848992601  
0.3685354165687709 0.7781056357473988 0.9493712099342151  
0.5165691812242712 0.0253850336741979 0.4465202481859388  
0.4824174966114282 0.2198877914772416 0.6541362351611796  
0.4220089747128015 0.5686411209894615 0.1391675307195908  
0.9739679124208702 0.0717575321275595 0.0559140768238080  
0.9142270227718151 0.7279954686538700 0.5537859198509889  
0.9083650400806644 0.5750922535190369 0.5500692685484005  
0.9759734235978181 0.2277376407837347 0.0599612341838381  
0.4193781282243963 0.7246497407730850 0.1505295197523673  
0.4674930201321203 0.0652008093614014 0.6496415101561727  
0.3246958472395750 0.2373533633991444 0.6305966334700749  
0.5768413560971729 0.5705039298773343 0.1340730711224502  
0.8155942720039954 0.0742186151959105 0.0709281082460239

0.0736595889637980 0.7248907962565136 0.5694968827609979  
0.0675929165468503 0.5698336006599997 0.5668665101492302  
0.8186819529067887 0.2311874692868913 0.0684470627598647  
0.5766585738303101 0.7270672810183341 0.1414484705739572  
0.3121819687751320 0.0814830561812915 0.6306707907834739  
0.2734020642375056 0.2815880819370893 0.4179462624230139  
0.6263011753013180 0.5232586875175698 0.9285195154278983  
0.7669236151839678 0.0212873455609048 0.2832216983348916  
0.1259724380675797 0.7755037334979485 0.7806567692501585  
0.1201364452930975 0.5232222826930079 0.7753493954854144  
0.7687666387135699 0.2791767424076216 0.2759113465018162  
0.6273477082109635 0.7794499339657739 0.9356278177802991  
0.2665775940113672 0.0221922225780100 0.4241450653525721  
0.4016186849373803 0.2271504068146321 0.3058142588011182  
0.4939246061364259 0.5719703699357944 0.8221770918580598  
0.8969284796492123 0.0712001280507372 0.3953634315064400  
0.9977672057672875 0.7286496598861734 0.8974643247667885  
0.9953357074332694 0.5736830330190699 0.8941549635939987  
0.9001177582701541 0.2277457702070179 0.3907245120577811  
0.3986246281572861 0.0726444556500959 0.3147457155593039

Structure H2O/4 S=10/2

1.0000000000000000

20.1473052208877697 0.0000000000000000 0.0000000000000000

0.0000000000000000 19.7681594983396742 0.0000000000000000

0.0000000000000000 0.0000000000000000 13.2309279702280254

Al Fe H O Si

2 2 10 200 94

Direct

0.2715495162724701 0.5719315597361070 0.7813623169114577  
0.5001409855049977 0.7295705946283959 0.8145643727744123  
0.3291318177398561 0.6315700416611492 0.5936069523763121  
0.4939424611728016 0.6620459003744872 0.6105582491761866  
0.4556839664779468 0.5665994499810650 0.5093201653639599  
0.51136754586667613 0.5945112013671293 0.3398019912930576  
0.4974740892425387 0.7519425567143305 0.4650507445494130  
0.5189077957744995 0.6815807335192099 0.4243725633942566  
0.1936556535277580 0.6503995193638142 0.5594195492028911  
0.2426760392582553 0.6430961074298814 0.4626553049510203  
0.6145039542472622 0.6826518431502561 0.7117007435479965  
0.6250985975852699 0.6944412877094049 0.5953923961579526  
0.4441723084022295 0.6318765930742049 0.3545081057688944  
0.2994002697720409 0.5634907990555538 0.3573887258402653  
0.7004142847484331 0.4792662298231852 0.3073954215735111  
0.1929189535062427 0.3328603345220416 0.8100601348025200  
0.2078226752724220 0.8213586548951762 0.4030905653576771  
0.6957534010787791 0.9678867307831855 0.8846303233920774  
0.6927475421616083 0.3229223067532622 0.8897768505367175  
0.2038610147659323 0.4807521040448722 0.3901475608993836  
0.2020729516866789 0.9645100493819947 0.8104507313328116  
0.7070400927849155 0.8191286862800673 0.3029425938598558  
0.5892837746509717 0.4657468661846611 0.4143403559251512  
0.3052409195392211 0.3448029780260567 0.9061591348957619  
0.0973473595827275 0.8339608225772197 0.2977325839928894  
0.8129649966406092 0.9752803014365834 0.7950570051794836  
0.8052200230522448 0.3331903484888277 0.7884028242600933  
0.0910415679389621 0.4666772277403027 0.2919473178056526  
0.3150668314250980 0.9825465439698226 0.9073833584898311  
0.5977834952213376 0.8461573374684020 0.4030810108416658  
0.5871480285587557 0.5377033965654886 0.2482139958333610  
0.3004528049223281 0.2779740797646086 0.7325298587798152  
0.0986770596661646 0.7572176760177657 0.4630781150471348  
0.7904094496403818 0.0437351321160924 0.9635193770421622  
0.8023840139752567 0.2626863071971637 0.9587497648133901  
0.0965207849682689 0.5391260000279986 0.4612657661962430  
0.2890831366715390 0.0538695705161488 0.7421126198043976  
0.5940099651670276 0.7592166075993988 0.2507242078930683  
0.6018816886266595 0.4032390576291205 0.2396552289345992  
0.2867166590208733 0.4136125891972107 0.7351622776029495  
0.1075816981619442 0.8916050839129106 0.4775900208096991  
0.8015393064356860 0.9090628498365851 0.9660798750300952  
0.7910109569730340 0.3977601972630272 0.9604923200308759  
0.1093517645766464 0.4042855473017419 0.4676827941572340  
0.3168801022523087 0.9235141373085599 0.7276807104170118  
0.6122952447484354 0.8909950553744637 0.2151026206770887  
0.5240468551160575 0.4364619183102443 0.5805434592051325  
0.3771758337922232 0.3578885778298176 0.0717698059283980  
0.0275476351255181 0.8604185116077334 0.1336745201834413  
0.8760899790886404 0.9382792442297198 0.6297279254357325  
0.8755753546249151 0.3637467271768056 0.6281457240225090  
0.0168471516011209 0.4426048515914783 0.1321967892861766  
0.3722913883890409 0.9437642903486231 0.0789114377395664  
0.5275876086615343 0.8674678272599954 0.5662120579522908  
0.5164295892390843 0.3534610034526773 0.4222760839420864  
0.3956978080666477 0.4427281127454115 0.9160885325373199  
0.0198314673860752 0.9433887808757924 0.2935686957128026  
0.8774093194206436 0.8583071928328047 0.7930227054539957  
0.8788814805833631 0.4454356644731339 0.7898327514204246  
0.0127161718176428 0.3583671750353523 0.2909790570087689  
0.3553757653881952 0.8567860146129398 0.9266847841590795  
0.5129393795031689 0.9490813709548540 0.4036807350537844  
0.4563163080930663 0.4698366156958084 0.4124513644534982



0.4332399599172854 0.3147720914758714 0.9021818814322784  
0.9668386633518858 0.8222953458746831 0.3037142906903951  
0.9460386003683640 0.9714677620243359 0.7912476672245872  
0.9367438234195876 0.3259867813844261 0.7961125831608830  
0.9612983651129685 0.4809327320490536 0.3063896995115490  
0.4451316182569941 0.9561681889056260 0.9173161416313362  
0.4674954067760250 0.8245873376025299 0.4006276822824991  
0.4826432885796931 0.5135207268601462 0.7350414663369448  
0.4234890248747596 0.2707556351579760 0.2073384664605696  
0.9825247368089978 0.7780985814300824 0.9927865194728341  
0.9149905763193199 0.0262596859248588 0.4923979294820969  
0.9117990480007565 0.2765987842177575 0.4879036869453307  
0.9756608123697065 0.5242226683193322 0.9873338357234384  
0.4173542576354733 0.0227372730695708 0.2219572886602092  
0.4979759782252010 0.7702484700881665 0.6959337210909726  
0.3980267878306765 0.4367051340908829 0.6311926297646863  
0.5048955385406222 0.3594879227851485 0.1214304838514457  
0.9008834946250803 0.8664469832371570 0.0812124311032930  
0.0015958564820640 0.9387643353553802 0.5714919518278585  
0.9997658221973232 0.3642563188538741 0.5619264163099367  
0.8910703550993665 0.4389479314031403 0.0757506129801867  
0.5000652857568232 0.9357418075520814 0.1336355551935033  
0.4029577258124444 0.8537831192471823 0.6214565715927697  
0.4892017425633588 0.3816775952600662 0.7508112892040116  
0.4130559858629945 0.3987461559236135 0.2543556214774764  
0.9943881695400076 0.9087333214135134 0.9536131886505343  
0.9067185763851263 0.8961167574812331 0.4461984711945434  
0.9002832053611861 0.4074021402874457 0.4456479222718855  
0.9862563803672093 0.3922530731065997 0.9538592130981275  
0.4044833050695765 0.8914348099760264 0.2545615562705669  
0.4930023635668389 0.8975596682115458 0.7534493887275076  
0.3131235957566674 0.5381567615971370 0.6698673909353243  
0.5930700272777532 0.2729089724293393 0.1987241776149255  
0.8196352110668449 0.7768502907399845 0.0000268581509665  
0.0901433669684083 0.0243530675591002 0.4953918171088020  
0.0919125583348907 0.2743893195761821 0.5051594451816322  
0.8037287406806854 0.5278476617364597 0.0051599571994075  
0.5852060058478658 0.0222553516561207 0.2145638574602133  
0.3084355745242421 0.7881991351026967 0.7223596701741934  
0.2804360397951279 0.4397975132682057 0.5415488670201467  
0.6302618997702117 0.3594548001687517 0.0576483826602973  
0.7743332141094743 0.8599367784606505 0.1424233225798513  
0.1219838979923296 0.9493149419122230 0.6536712813860744  
0.1170691509214448 0.3596720788464274 0.6533626657594983  
0.7654106642052108 0.4388894739204662 0.1430205234938079  
0.6176914821568589 0.9598464260045155 0.0461094831586489  
0.2759551400683782 0.8605262958778896 0.5645391721167020  
0.3287786994144219 0.4722959035077803 0.3614679151767961  
0.5633939092325498 0.3267492766807223 0.8945670092116021  
0.8364669975142506 0.8291115105032979 0.3100598220127933  
0.0741489231729772 0.9794579631317555 0.8345145170140741  
0.0652198836004421 0.3222952061252176 0.8297736448462448  
0.8307201983878861 0.4711356596571837 0.3053097608676789  
0.5686476783539591 0.9794166251379938 0.8621340678791432  
0.3365922177235497 0.8273464171392083 0.3950033865874665  
0.2592185900019748 0.3584658730119279 0.3845104575137391  
0.6316225086469559 0.4423991259878025 0.8996395107697597  
0.7629421869997248 0.9404863990365633 0.3036464297903398  
0.1238601199277845 0.8576738409180387 0.8033306055213250  
0.1182839855176691 0.4437188547337457 0.8113587075424744  
0.7580375487230990 0.3587323041022435 0.3061959887346468  
0.6186642517739682 0.8597998047667843 0.9101928052620540  
0.2665548112062917 0.9422259776939462 0.4063820872629031  
0.4145926306315313 0.5346223476175722 0.2526038739843853  
0.5027455947167744 0.2493020751476814 0.7642917659600379  
0.9001025585376142 0.7603867865812834 0.4448579163154131  
0.9870818484706827 0.0441303579591189 0.9439311126366607  
0.9855227411618849 0.2568998492862392 0.9485891145020702  
0.8873116214141042 0.5430849917793142 0.4424324468307915  
0.4701380548891284 0.0311720414306108 0.7582080116549604  
0.4039438022254554 0.7555323165335135 0.2631948419125891  
0.7020368991971665 0.2375184989237755 0.3050677372108290  
0.1883134183829801 0.5570547172970932 0.7754378217930165  
0.1972146654821777 0.0554803197930994 0.3838599076414912  
0.7035990408151335 0.7583392368475553 0.9080128541803849  
0.6947131544961810 0.5601506171191869 0.8980137107940529  
0.2043243239615418 0.2382636796776905 0.4073287688210891  
0.1955449477247824 0.7441694694917175 0.8031315768653869  
0.6972502637063001 0.0558771107036575 0.3134182214160848  
0.5865317928402091 0.2422146753249350 0.3952567613879756  
0.3069443547778790 0.5429601530824790 0.8911626006841247  
0.0808458623396361 0.0616906097034874 0.3007359024651303  
0.8132305375907540 0.7409193484216294 0.8061873816358360  
0.8104948113905027 0.5602890832380231 0.8095592362536392  
0.0916453408224524 0.2502854580817289 0.3073116186192626  
0.3069737460286739 0.7341750072047697 0.9060050385214665  
0.5839402068473369 0.0620325883206294 0.4077294853116040  
0.6091642216069528 0.1481515050893734 0.2567399556036162  
0.2868903637346727 0.6566151364547163 0.7433250194059948  
0.1099172893437311 0.1503320354403828 0.4430593232912369  
0.7828623953885681 0.6532762574564230 0.9505889241572355  
0.5236224597649873 0.2600203699620810 0.5660763968829610

0.3730740404939802 0.5283129605159019 0.0650186511480110  
0.0134827673177421 0.0261346866919555 0.1370574543964452  
0.8780306960690065 0.7737578300736931 0.6397713629179690  
0.8731723776098610 0.5316916164027555 0.6388483670341800  
0.0205384401476984 0.2703630330257515 0.1407257989801696  
0.3741603362888818 0.7675570544069538 0.0706768282675988  
0.5110558795078132 0.0240526001852051 0.5680684788672876  
0.4536212072651343 0.2373542070850313 0.3981876457860107  
0.4362514582583993 0.5692949811460560 0.9029773695758352  
0.9495072994397051 0.0576908410099771 0.3043020868083257  
0.9453339229662782 0.7438276894206606 0.8053107807646860  
0.9421792982048779 0.5632302792312803 0.8014846488879114  
0.9604003466920915 0.2363491663549028 0.3107528028238743  
0.4382645366017665 0.7533388383614253 0.8955203000308402  
0.4524488053727511 0.0681062539591288 0.4033274874900728  
0.4994267547658930 0.1419749596084264 0.6535768424675897  
0.3958740961527008 0.6469162576271368 0.14977676068530876  
0.9984954081172331 0.1495662375479378 0.0643051875529466  
0.8826053380788588 0.6528875802150712 0.5566949622078005  
0.4037275636271935 0.2343336625832576 0.6316037576478331  
0.4977853372938561 0.5645746597257693 0.1059247957884253  
0.8942775218087945 0.0679872304680575 0.0816975140955889  
0.9935221438775357 0.7262115408984242 0.5761696418559176  
0.9879828451148341 0.5744981908320794 0.5596539554330650  
0.8973977217310608 0.2345519564067829 0.0929140090307121  
0.4964566879721760 0.7329547084030258 0.1215985327939508  
0.390435333949206 0.0717759294249758 0.6128796031737904  
0.2925766686508922 0.1622220685418835 0.6274513164404281  
0.5995935209878752 0.6483940750659740 0.1378070357674525  
0.7924214467192122 0.1536676180980223 0.0755942046372737  
0.0997355741168344 0.6464565427041858 0.5766398293675754  
0.2988250620657993 0.2804334818003667 0.5337880895983520  
0.6186347354062740 0.5271285798426516 0.0544386878642765  
0.7805111227854055 0.0328789555485865 0.1623223748017206  
0.1049314483334232 0.7675079509078788 0.6619569208656245  
0.0871549141785845 0.5231254903073688 0.6605046274342722  
0.7804624155893608 0.2762875008365981 0.1543324662932286  
0.6153835635809621 0.7689947719544822 0.05506564466011509  
0.2727536037892061 0.0405715206946357 0.5442507539742932  
0.3274629559327568 0.2481908756055205 0.3427934129609679  
0.5663031759946278 0.5580282531334554 0.8753215565084120  
0.8231881446665253 0.0548771411305037 0.3523218814951946  
0.0713311672994601 0.7395590564242176 0.8541078689041259  
0.0683129392739305 0.5630309102562069 0.8526855282108136  
0.8300573575470490 0.2469154938288206 0.3362069019936100  
0.5793295699233917 0.7346524381830222 0.8652828554155340  
0.3253978960612235 0.0572387083106131 0.3592057693557926  
0.3997098011518473 0.1492969227245184 0.2686860296436153  
0.4955778143913535 0.6446174801245350 0.7675203524050551  
0.8986448947672374 0.1504956007331338 0.4293010502090503  
0.9874533849778271 0.6516600661261601 0.9363334990294114  
0.4968035692314193 0.5803376531525780 0.5426968010227816  
0.4027711486115593 0.6809217539269559 0.6124291894017458  
0.4905990431472155 0.6390499234205556 0.3340806669417030  
0.5259092239286037 0.7134115891272738 0.4841905581746298  
0.2385130345342720 0.6601349505618610 0.5337216445800701  
0.6033535950896566 0.6650797697428125 0.6445187437151463  
0.2987341052304871 0.6112555236001463 0.3795140340160670  
0.3525478054577789 0.6114153381675856 0.4540879504575132  
0.6203998553094882 0.4713285427961564 0.3014091789668435  
0.2717659888220977 0.3425118698752314 0.7944698476537985  
0.1277758354335002 0.8260231804370607 0.4111774596175349  
0.7746296006739427 0.9738771625690270 0.9034752844666827  
0.7726819603188231 0.3286436049381271 0.9006865689507221  
0.1241341917129545 0.4724006732402573 0.4036173038092616  
0.2801690785018363 0.9804869894792774 0.7964673389741290  
0.6274298730298992 0.8288269057405051 0.2915932275141300  
0.5218340938607315 0.4317451780841760 0.4589803775666776  
0.3778902067962918 0.3656109107931305 0.9494142868853318  
0.0278428268921377 0.8652549473395527 0.2558683560547534  
0.8780643932661302 0.9359927344407468 0.7521078411174532  
0.8742367723575185 0.3674639290441904 0.7500845693477504  
0.0199424407425564 0.4367635530648594 0.2539490105290673  
0.3720107675049710 0.9342194168555132 0.9571463748271566  
0.5268716704537815 0.8730679641250965 0.4447542180624794  
0.4735028969359106 0.4433752615463638 0.6753063779193471  
0.4297176474111479 0.3467348492388038 0.1629715728349188  
0.9761990580723695 0.8535697141918221 0.0395217770346984  
0.9253027842362165 0.9489303372081044 0.5342573522916845  
0.9224926600554362 0.3527816876421186 0.5301816485975227  
0.9671802167162475 0.4495849992949300 0.0360881576538335  
0.4242308912193078 0.9484186025382424 0.1720203023602542  
0.4796620253542851 0.8460346259771109 0.6606011351010012  
0.3205037497120249 0.4570956100303836 0.6443988505910977  
0.5822067290953631 0.3484866185012770 0.1541087355594553  
0.8242238052073558 0.8527118173828923 0.0471885274332603  
0.0800438055466055 0.9513834599295301 0.5495089447491402  
0.0786780460167390 0.3504294648210846 0.5473883072782675  
0.8133706295265876 0.4510649463936073 0.0464539378652715  
0.5783121878492633 0.9520590198809391 0.1520977944714843  
0.3264159051701786 0.8557849292588877 0.6600118384233691  
0.2681083537260030 0.4358575551566048 0.4212088438417821

0.6293584265926335 0.3636327015797005 0.9350130500892270  
0.7703399462526812 0.8630123592855858 0.2646952936308664  
0.1304762856995887 0.9371655150379226 0.7743133280760877  
0.1229868451799723 0.3656518995696095 0.7753765783498562  
0.7635734874874458 0.4362442956181898 0.2654905385968819  
0.6252305929409621 0.9405398643718575 0.9270615835250345  
0.2719361160659686 0.8637407146630487 0.4422812574165864  
0.4042489786333948 0.4671868601010409 0.3188585915017840  
0.4971167723745700 0.3190314533329810 0.8277149555182368  
0.9028424826313293 0.8283750762744762 0.3773531900948107  
0.0003210311896574 0.9748993453046424 0.8817100086141276  
0.9933508677483655 0.3255961897686698 0.8832298671256451  
0.8953490678552458 0.4747276830057829 0.3762894605344612  
0.4941313183916045 0.9653943822090311 0.8215864459701480  
0.4023590148344309 0.8255268313211804 0.3261095573752907  
0.6230375697495408 0.2259797392380150 0.2886812832013496  
0.1200998150726204 0.0725718410522834 0.4068601060166943  
0.7788143346130136 0.7322017977518355 0.9171290267533315  
0.7728802348684756 0.5751750066981806 0.9161590217366395  
0.1245641912990672 0.2288321627256236 0.4154879288701702  
0.2747356920169959 0.7309788163475220 0.7934281535948193  
0.6193342934333607 0.0714979940230945 0.2974640860414866  
0.5196969794601586 0.2730044531427818 0.4452467584534698  
0.3754395380780947 0.5212822662040973 0.9418511317683609  
0.0158911989709746 0.0222151561227321 0.2595013096514118  
0.8783865947269278 0.7790395165921397 0.762086338242259  
0.8758955756640012 0.5252289708779674 0.7609812887876664  
0.0217472373043736 0.2787539782957932 0.2628627830460421  
0.3708985658849715 0.7769779055666880 0.9481274683200390  
0.5157385291921484 0.0265222817085193 0.4457047811414948  
0.4817475413696212 0.2215825775389040 0.6538853601540920  
0.4207520212468931 0.5695455581766825 0.1419831926836930  
0.9727562238219380 0.0722623777740782 0.0563171790538046  
0.9142948042438882 0.7281604101223851 0.5543129816546233  
0.9080419628149933 0.5753978622864389 0.5498349900176482  
0.9750724270639993 0.2277773900210252 0.0613702995509775  
0.4185247852653523 0.7255143695467406 0.1509364671649024  
0.4672324105144378 0.0672280100072275 0.6490444475563558  
0.3237482897925545 0.2380824019767409 0.6319541019588411  
0.5755588382802401 0.5702993098380977 0.1359888559758299  
0.8145947528716360 0.0747079344789641 0.0705922124223389  
0.0733423648840924 0.7252439556980422 0.5693111614403946  
0.0674341007367232 0.5701294057885791 0.5657264329904762  
0.184246670419499 0.2313094693373844 0.0694708913339420  
0.5755956663997828 0.7269698355341420 0.1408359253264941  
0.3115667442686060 0.0821753312795171 0.6321905721663317  
0.2726773648412870 0.2803683920785554 0.4177166150023813  
0.6274431788788454 0.5215869387605880 0.9318393158678582  
0.7666838867202443 0.0210917288266208 0.2820420644508831  
0.1240599123692644 0.7771511644297755 0.7808537662689407  
0.1174199696863580 0.5225613016913091 0.7758761251472605  
0.7681478081861010 0.2797145147514232 0.2759108676594736  
0.6275881699163430 0.7794983158211007 0.9339110876833036  
0.2662117060703123 0.0234804924028356 0.4243141489571077  
0.4013257623377008 0.2272060587735953 0.3054740335224406  
0.4954899240322433 0.5703471214560416 0.8203739011310518  
0.8966178798808534 0.0719130417763217 0.3945033738276428  
0.9967773202361379 0.7289243563414661 0.8973780717692456  
0.9939053875985649 0.5746433625241310 0.8946909954329941  
0.8997213992622927 0.2282357851959650 0.3906766791900566  
0.3980499514224545 0.0731686618947889 0.3131291311778304

Structure 4 S=10/2

1.0000000000000000  
20.1473052208877697 0.0000000000000000 0.0000000000000000  
0.0000000000000000 19.7681594983396742 0.0000000000000000  
0.0000000000000000 0.0000000000000000 13.2309279702280254

Al Fe H O Si  
2 2 8 199 94

Direct

0.2713860976466880 0.5715212136521224 0.7842447715178938  
0.5002136548503182 0.7291922028017944 0.8145979964680047  
0.3272875783092637 0.6311780723051951 0.5967008854171937  
0.4914971012006228 0.6622451371381832 0.6105542280698487  
0.4576837955252665 0.5708876071712976 0.4965740386369492  
0.4957338027210585 0.7453164952338750 0.4435300808417209  
0.5260297842210109 0.6718375942433796 0.4300866052983862  
0.1926368330021914 0.6514611223821700 0.5603662015215830  
0.2418253690655767 0.6441850077513283 0.4644502275017366  
0.6126799008728034 0.6836911635366838 0.7108345549427624  
0.6241410427050375 0.6990817564709811 0.5959610761983605  
0.2990400438863280 0.5643627192681351 0.3548831825969097  
0.7009907528380438 0.4787363641689935 0.3090706265302957  
0.1928262883159442 0.3332198706541750 0.8105924267854332  
0.2077390216737013 0.8215797885580532 0.4025442290495799  
0.6957263827053909 0.9681550390380145 0.8844988843777997  
0.6927272085369555 0.3225035585370249 0.8896411072906062  
0.2039404679791839 0.4806065710467555 0.3897137124633716  
0.2019095001089122 0.9639054346315338 0.8103460704288935  
0.7068951920726594 0.8192276131773177 0.3026013063834863  
0.5893332654406822 0.4654598733294400 0.4143987550921333  
0.3052118618069667 0.3448558144099070 0.9065994617660301

0.0971754728860262 0.8341961671506807 0.2975542991570105  
0.8129502521240436 0.9752689206820202 0.7948861834360599  
0.8052329342552008 0.3332329897227120 0.7884335284367151  
0.0912406659960045 0.4663788591553173 0.2917951070363712  
0.3148216132033521 0.9820195997023776 0.9073999730530887  
0.5976721309556898 0.8453777639087401 0.4033735986258806  
0.5895061614941618 0.5382326651526983 0.2479150612365162  
0.3001998337418174 0.2774637156121775 0.7335405519461511  
0.0984909864830898 0.7575378346996470 0.4628999042695221  
0.7905492162554513 0.0437470165311974 0.9633133175509392  
0.8025696768793245 0.2627258913073990 0.9587209032952873  
0.0965890157202475 0.5389329000844636 0.4611166977534952  
0.2889623455805332 0.0534186732601766 0.7421502753861633  
0.5938911414585927 0.7590105213850112 0.2506357444655700  
0.6024101196999896 0.4036146341495742 0.2393197049112685  
0.2868251584695326 0.4130964592723698 0.7348409068411670  
0.1077678573302161 0.8919068221208646 0.4774537309072666  
0.8013002293356010 0.9090317391973444 0.9659691374847310  
0.7906353011652071 0.3977344286985217 0.9605974866480657  
0.1093973592477313 0.4041962771886964 0.4678351920683170  
0.3167072841707079 0.9230468815189030 0.7276661449885096  
0.6117293640391002 0.8908964779550591 0.2153572169525462  
0.5245897158572218 0.4363429571316519 0.5811611521659390  
0.3771094597602866 0.3577380263968973 0.0725821837356629  
0.0276476171996885 0.8607763348675010 0.1332506344505877  
0.8759650874096019 0.9382591678904187 0.6294287218630872  
0.8754865892254726 0.3638109083649434 0.6280950965303944  
0.0166991447700064 0.4426373232870870 0.1321767593811440  
0.3721297838666254 0.9431223415663544 0.0789419722461013  
0.5277336063761937 0.8668372419188465 0.566731199962209  
0.5170826223151653 0.3532249903668270 0.4225380491620919  
0.3954691875842565 0.4428283140865934 0.9174127039469637  
0.0196719438454678 0.9435595249300422 0.2934224237715865  
0.8775342560569305 0.8584364456024774 0.7928854309362616  
0.8788944769779218 0.4454633038592489 0.7898212129112501  
0.0124209375497784 0.3584252864868149 0.2909740517955324  
0.3562133687201037 0.8566036854488226 0.9260498123544695  
0.5124743080141959 0.9481506643666703 0.4042546348784461  
0.455131584160897 0.4687118915729429 0.4154883491484238  
0.4332442690070629 0.3148906850414181 0.9030009907440349  
0.9666177223150797 0.8224844369274934 0.3028696179966186  
0.9460475779818401 0.9716796869515075 0.7907379047615396  
0.9367839970152547 0.3260756381236160 0.7959422783022255  
0.9616958916599645 0.4812459863087559 0.3066743664637199  
0.4451165167881966 0.9566406943710458 0.9175120317711242  
0.4677399167851279 0.8232306101910414 0.4005608658610064  
0.4825761588289304 0.5140466747010823 0.7336895186003533  
0.4234308466684716 0.2720432926913939 0.2094513747001160  
0.9827931660275255 0.7784243141329570 0.9923108353943264  
0.9147942340325805 0.0260902915489516 0.4919589102969467  
0.9115804494162543 0.2768173959460375 0.4876548145525216  
0.9753450024804434 0.5242903324184395 0.9874449982320399  
0.4166729400720158 0.0229219949518762 0.2213903328157825  
0.4973928169011095 0.7699557637521393 0.6960119807574285  
0.3979722469690954 0.4368917625824563 0.6310482064719221  
0.5051391618892543 0.3593970546101812 0.1214228407215248  
0.9009920725107708 0.8666627407547743 0.0807079304032656  
0.0014403158709640 0.9386042376220074 0.5710208219194863  
0.9997154798517317 0.3642625530554225 0.5620692807759685  
0.8909250101104365 0.4387296555952628 0.0754823644749746  
0.4998637226049615 0.9359871190044075 0.1334948012855218  
0.4027757629471881 0.8537346577508087 0.6209020044668860  
0.4884338292111005 0.3819142067427073 0.7512827101135905  
0.4141606125888480 0.4012280172505648 0.2532587864433755  
0.9944618990329975 0.9091018291833031 0.9531964390631286  
0.9065084736221615 0.8959303217744780 0.4458866831805404  
0.9004313185752280 0.4077393351468449 0.4458178253682740  
0.9863684080789706 0.3923446708152388 0.9536941492353477  
0.4048443119112481 0.8915897801413037 0.2550881310854977  
0.4924014841595515 0.8973782558010232 0.7536213972003237  
0.3129351032949754 0.5379045235045198 0.6729543220244523  
0.5930291185549778 0.2730441152671716 0.1997261252743115  
0.8199392957658990 0.7768592553243748 -0.0004091860620739  
0.0896720288817123 0.0245991231098207 0.4950274622865596  
0.0916055411711361 0.2743106223325520 0.5050999572118005  
0.8036341891194312 0.5277724089152515 0.0049352119270822  
0.5853330608848532 0.0222903023799460 0.2139794371016842  
0.3086461964546691 0.7877200139507134 0.7221897300955866  
0.2807492943257091 0.4410521785024314 0.5412210944685457  
0.6303108781677913 0.3588456825729153 0.0575905936008976  
0.7745621231620575 0.8595988953537561 0.1423007205464354  
0.1216901121857881 0.9497832836275475 0.6534925321554277  
0.1169882419745069 0.3593687201403299 0.6535440989546352  
0.7653494020096864 0.4390326755903202 0.1432940595154350  
0.6175468046624047 0.9592518640057012 0.0457990376495922  
0.2757747394483894 0.8601848091091771 0.5643679888096308  
0.3288009784487997 0.4730021977951411 0.3595373509752894  
0.5633997403283545 0.3270585742511203 0.8940071232481355  
0.8362345105621016 0.8283950156828396 0.3103755389547929  
0.0740838909840596 0.9802675093820399 0.8344154101036698  
0.0651825457305785 0.3217278773261585 0.8299981779310449  
0.8312520482756890 0.4712398942179647 0.3048255499586182

0.5685842720762039 0.9792572082942433 0.8616897253233394  
0.3365544931579248 0.8272818597326671 0.3947774016512338  
0.2602102687239096 0.3588449821953958 0.3850612523455002  
0.6323160387345661 0.4422300211201671 0.8998367490792559  
0.7634992983537030 0.9403062671110807 0.3034147466235975  
0.1223416992066024 0.8580041054587212 0.8029954203301196  
0.1170949747360461 0.4434710005572636 0.8114797494563073  
0.7588952008479402 0.3586158192453862 0.306397089518733  
0.6189678287836746 0.8597925311075554 0.9089640040389436  
0.2669760586548631 0.9422826752127882 0.4063714333638246  
0.4174699922495196 0.5372047022134298 0.2564637663785456  
0.5022162130350112 0.2493263890481726 0.7647429674524844  
0.9008104918520314 0.7601659535805753 0.4446429598603894  
0.9865269379289662 0.0444241912437032 0.9437567161033017  
0.9849702516151893 0.2569776179213930 0.9487618774922355  
0.8874762795877668 0.5433874083840715 0.4423133581801699  
0.4700770347280062 0.0311529013858670 0.7580029044225522  
0.4049749083810647 0.7554980610958076 0.2634724979814454  
0.7020587351290410 0.2376998117235975 0.3057511426022800  
0.1882690001779256 0.5562842180068688 0.7780630431700866  
0.1970489149342249 0.0551801017870716 0.3838967163357644  
0.7038619696895415 0.7582047339859997 0.9078867860536624  
0.6947223861741118 0.5605143646311012 0.8975140958688570  
0.2042281628075333 0.2389169648720434 0.4074496557336750  
0.1956842602968373 0.7456392158229259 0.8045056907527672  
0.6971474967862764 0.0552290614282580 0.3138037284861338  
0.5865293173577866 0.2414694551057910 0.3961026644608404  
0.3071265085424511 0.5436869956346981 0.8945016354244756  
0.0809244397763922 0.0617695280505076 0.3002698926953923  
0.8132762107091438 0.7410478424334439 0.8057111174502133  
0.8102733093589216 0.5601679658009039 0.8091414678046444  
0.0917274279413568 0.2505654966491940 0.3070956879509251  
0.3073131505322514 0.7341931892514110 0.9063046847747083  
0.5836747209266749 0.0611800547138203 0.4073705961754112  
0.6095237921629295 0.1480227580985175 0.2571207763552492  
0.2857252071038439 0.6563447452891693 0.7449061483946323  
0.1100594592066449 0.1504731580215679 0.4425564125312694  
0.7832667613385748 0.6532449711132197 0.9502663312412255  
0.5235674236681583 0.2601980222765597 0.5668523904528338  
0.3744554112808181 0.5281880470809562 0.0674262210335889  
0.0133579552332988 0.0261668669848592 0.1367787089486735  
0.8781109173822715 0.7740463203919503 0.6394148412608012  
0.8732539686591920 0.5316320779618707 0.6386712309260714  
0.0203601861510465 0.2704738812085213 0.1407287979616705  
0.3742222674659298 0.7677998163367906 0.0709256612036931  
0.5107762390962000 0.0238641464416934 0.5679296561608077  
0.4537054785132888 0.2370799190211530 0.3993379045368782  
0.4366198213341081 0.5689081764891628 0.9034620592692846  
0.9496052389216316 0.0579850288351194 0.3041793921432686  
0.9453060854901092 0.7438850965367144 0.8050810481963493  
0.9418245324045962 0.5634786102842271 0.8016064926397206  
0.9606031580815615 0.2361944719165761 0.3109942454980682  
0.4388220499694565 0.7526529644279332 0.8966491864226016  
0.452262822001329 0.0674139359824552 0.4028740974193457  
0.4992937376446706 0.1419746776075271 0.6534899600207932  
0.3970417407422570 0.6471404208125430 0.1510717187136522  
0.9982808779889686 0.1496603713119405 0.0644367460066717  
0.8829516219354886 0.6529672869258908 0.5570649453152179  
0.4034423049060875 0.2341215022762430 0.6318411563642451  
0.4988182812810353 0.5653667303113470 0.1070935917021332  
0.8940642078739008 0.0680368395941356 0.0821558035261921  
0.9937702109625511 0.7264734299193518 0.5769359326592214  
0.9881904925393209 0.5743587521253729 0.5599216633031657  
0.8971526150631033 0.2344716217370982 0.0934621268979426  
0.4968452956079499 0.7327545257852739 0.1223016017928214  
0.3902542736884710 0.0717259947949110 0.6128635857270800  
0.2923046367959966 0.1620399867393280 0.6279739897221197  
0.6002203783604256 0.6487533090451728 0.1378324123155085  
0.7921682103986422 0.1536621444527020 0.0753467876916869  
0.0997807309331856 0.6465260624855245 0.5760517371028175  
0.2983411992285230 0.2805155912006672 0.5348287088825261  
0.6191456831058757 0.5273666154182899 0.0538766102200945  
0.7800614369555415 0.0328659083900072 0.1620192191489207  
0.1057565837241157 0.7672857656656633 0.6617205978951795  
0.0878442165468737 0.5234891608060727 0.6605560163645713  
0.7800082390377850 0.2761314441630089 0.1542452674600085  
0.6155061634793016 0.7696087908522519 0.0544000244059298  
0.2726174637641959 0.0405147820492155 0.5442826431942807  
0.3274730635796703 0.2477357325854820 0.3441601603110386  
0.5664123687780690 0.5574156079884565 0.8746800828753555  
0.8232387829068277 0.0550817806722305 0.3517149994627481  
0.0712691427679509 0.7391735581100446 0.8535344503497647  
0.0678503620118748 0.5631689647140872 0.8526527210922288  
0.8302016329225794 0.2464045041601318 0.3356399111814663  
0.5795849216162340 0.7345941611732523 0.8647089428542906  
0.3251668053118772 0.0577064159167128 0.3591269098783395  
0.4000667948336729 0.1496356689939649 0.2688221163906043  
0.4957200028940104 0.6443218021637477 0.7674129977608304  
0.8986959984740223 0.1504913845461881 0.4296091345637070  
0.9871603159745854 0.6518101024286269 0.9365189595036797  
0.4971439551490379 0.5835183468876290 0.5353970514761538  
0.4015821641027349 0.6813012244737185 0.6141980909014561

0.5247174429399498 0.7108186715844507 0.4754178683918945  
0.2374896116331092 0.6618388933644627 0.5351060829881596  
0.6017944387705380 0.6683173229503993 0.6423302391264571  
0.2979796916040741 0.6106093881055388 0.3833005909808384  
0.3486674758625500 0.6050697846329521 0.4611442932027168  
0.6208449156455844 0.4715736391286451 0.3018881820759524  
0.2717357474119083 0.3423821559575483 0.7949030221974533  
0.1276827527894264 0.8262759186624870 0.4109396841004598  
0.7746369679673702 0.9739379813774598 0.9033117231784724  
0.7726208070626980 0.3285778433605679 0.9006579910518097  
0.1243247968774673 0.4721891166614241 0.4034980250780723  
0.2799809759653363 0.9800313566424900 0.7963998925754954  
0.6273179557324126 0.8287838848364241 0.2916019649770599  
0.5220429468314162 0.4316210041161456 0.4594643544854295  
0.377862110747464 0.3655806059915830 0.9502967309960405  
0.0277359257189709 0.8654948902662349 0.2554589320059101  
0.8780762311322317 0.9360904270002424 0.7518056024475472  
0.8742168929656415 0.3674974782104934 0.7500299371167652  
0.0199992443284109 0.4367966001524278 0.2539312520724101  
0.3721060299043307 0.9341048823167327 0.9570614366897185  
0.5267608201218844 0.8721893003678869 0.4453682501046724  
0.4734045436529338 0.4434008120483746 0.6750215916094120  
0.4299664251319724 0.3476942786769638 0.1637626651836100  
0.9763422749363821 0.8538808515198566 0.0390381516335345  
0.9251330247512558 0.9497032708309986 0.5338570014517284  
0.9224484141408700 0.3529307263225277 0.5301601735901170  
0.9670531810397280 0.4495512771832544 0.0360223021788091  
0.4240465969890526 0.9485141336506989 0.1720015426575995  
0.4792891702983376 0.8457894478211363 0.6607027580354943  
0.3205288320219203 0.4572918578714960 0.6447080320522645  
0.5824052966803382 0.3485667618916680 0.1544685446452526  
0.8243537965398221 0.8526963726312010 0.0468621319728865  
0.0798472072916392 0.9516129297973911 0.5492071373997310  
0.0786167044374255 0.3503646070788086 0.5474839339830124  
0.8131772775008363 0.4510066261628557 0.0465113056862584  
0.5781612098145007 0.9520311011780195 0.1518488078069139  
0.3262763217966131 0.8554182230682443 0.6597978700762342  
0.2687847243100657 0.4365685138931368 0.4207491474633379  
0.6294735442852429 0.3634167938350984 0.9350150675843015  
0.7705072639932302 0.8627945473088278 0.2645443679048589  
0.1300034547626200 0.9374343040065796 0.7741246290926000  
0.1227210524039572 0.3654458473861091 0.7755881323603024  
0.7639254145198261 0.4362021507446129 0.2658656832159177  
0.6252478287041443 0.9405012460759417 0.9265675561180862  
0.2718692417498401 0.8637458326572641 0.4421159760143514  
0.4051959117253363 0.4688521415895369 0.3200755254750252  
0.4968169950831333 0.3191949141739294 0.8279603038166010  
0.9028882118354449 0.8281505829980936 0.3770962636773948  
0.0001856458581496 0.9753430002354172 0.8814044574815999  
0.9932576020456725 0.3255531236029151 0.8832530157158447  
0.8956141593767201 0.4749763641693701 0.3762594712249638  
0.4939621006896114 0.9654062427886002 0.8214444051089969  
0.4023694422306716 0.8255391405270175 0.3261777924122205  
0.6230889226131828 0.2259282689499916 0.2893501692045110  
0.1199901817427064 0.0726696651731411 0.4065597794103732  
0.7791249610146623 0.7321273945274172 0.9167812865708516  
0.7729184266153611 0.5751406177060283 0.9158936926042437  
0.1245448857484088 0.2290733478553303 0.4153244574792587  
0.2745675686753508 0.7311571593009987 0.7940674195756439  
0.6193453904111551 0.0712608014240925 0.2974452043319942  
0.5198842844331162 0.2728940284081099 0.4459042038703415  
0.3758640313722746 0.5213724541538763 0.9440164895897398  
0.0158651755525188 0.0223789971887080 0.2592395026361136  
0.8784625927198438 0.7791980649222119 0.7617534772363647  
0.8757810982464420 0.5252128318145578 0.7608094060002623  
0.0216997646165127 0.2788443186632094 0.2628707407168715  
0.3713070392759538 0.7768609269077298 0.9481787845222586  
0.5154454748143606 0.0258642633192517 0.4455506505962335  
0.4814968668866477 0.2216065967534777 0.6542229088593582  
0.4220197334391682 0.5697105831446060 0.1443423556443801  
0.9724845142109018 0.0723981099031990 0.0563308614852430  
0.9146096209045378 0.7282271744024794 0.5544162664629148  
0.9082463169593649 0.5754237304158683 0.5498721660489152  
0.9747836076461943 0.2278636567523441 0.0615746954156079  
0.4186796655011409 0.7258081957891108 0.1508446499000060  
0.4670854175825050 0.0672553028891019 0.6488597534754662  
0.3234632470370192 0.2379429732650379 0.6326175728920248  
0.5767641233306610 0.5702539700170443 0.1365007884984288  
0.8144114156702341 0.0747546273567815 0.0705376520449022  
0.0735425355600719 0.7253600237297992 0.5692205334062378  
0.0676648369518540 0.5700656630726347 0.5655565689804233  
0.8182318288152455 0.2313100659043033 0.0695150177364085  
0.5761983749704708 0.7272041251969678 0.1399251424300234  
0.3113916930370197 0.0820444546211026 0.6323494026956580  
0.2727580910881381 0.2806887968218070 0.4184509326496249  
0.6277332811523615 0.5214707037570029 0.9314633275932761  
0.7667157016635782 0.0209711550071581 0.2818507471811491  
0.1238735946014646 0.7774438880838498 0.7808746022227263  
0.1171290516465979 0.5224030320947703 0.7764982243947153  
0.7682323531166670 0.2796017412115716 0.2759634272414386  
0.6278855941587561 0.7795876483239940 0.9330535198000258  
0.2661985771210721 0.0235643345582018 0.4243008937523114

0.4014328878389832 0.2274682345609998 0.3065042130387266  
0.4955131666565146 0.5699918328631066 0.8202758492349954  
0.8966071578001501 0.0720254632768225 0.3942862670710477  
0.9967342319372805 0.7289418974361299 0.8971532987883882  
0.9935180957831264 0.5747644457698808 0.8948493517928116  
0.8997676973102082 0.2281911890977034 0.3906585758015587  
0.3978455874585494 0.0733972644765464 0.3128549067155250

Structure 2xH2O/5 S=10/2

1.0000000000000000  
20.1473052208877697 0.0000000000000000 0.0000000000000000  
0.0000000000000000 19.7681594983396742 0.0000000000000000  
0.0000000000000000 0.0000000000000000 13.2309279702280254

Al Fe H O Si

2 2 10 200 94

Direct

0.2696359998910154 0.5704203006876845 0.7920137242437835  
0.4942508034766823 0.7325301433308609 0.8213137445708394  
0.3201021762083439 0.6207199053515697 0.5959536140942919  
0.4917468192219380 0.6769233925418218 0.6181883419277713  
0.4936774710288255 0.6857889126766992 0.4374026692303493  
0.6690782724612141 0.7456997950544908 0.4902769946717349  
0.6018558358859867 0.7071866098968318 0.4735261383665976  
0.2005334497746931 0.6739006880808570 0.5707933768918289  
0.2407229754719936 0.6632089286420876 0.4692326268173105  
0.6060328550756541 0.6739745547672199 0.7213015176871654  
0.6226674998564697 0.6762801538184544 0.5997165928268318  
0.2401866821242612 0.5632763786794536 0.3795092685180230  
0.4169683979926581 0.6046035158203276 0.3498781510016771  
0.4279548816760784 0.6157749576339335 0.4640782186039051  
0.7026275588015840 0.4710375184308290 0.3121517971903422  
0.1917118171594264 0.3361819669058643 0.8169785633448855  
0.2040111497030885 0.8215875538020012 0.3974272121215714  
0.6917659609517246 0.9776802911906237 0.8902596721655284  
0.6936567234610991 0.3249724180245107 0.8871003481925089  
0.2047135948479027 0.4796079025607454 0.3935497570309758  
0.1959755076616433 0.9699619562437048 0.8079044961945766  
0.7040374523751841 0.8214975078191595 0.3037616954588803  
0.588979324324249595 0.4646552332702809 0.4115413167256393  
0.3061501547440411 0.3347623898491973 0.9075985898102202  
0.0937123939217289 0.8344176260567390 0.2907178659236319  
0.8062099208614972 0.9700857983584694 0.7902249107477413  
0.8063727474502552 0.3327616504432083 0.7901091771591543  
0.0923441520590276 0.4678844674150259 0.2925428343014647  
0.3089784716315996 0.9807980474612701 0.9097360095784205  
0.5951054259065706 0.8397788250580570 0.4058903423696377  
0.5996969206963587 0.5388322552386684 0.2450629270356743  
0.2921645652456157 0.2730844524689083 0.7297918814104666  
0.0933040740207873 0.7600756229652094 0.4573086556292293  
0.7967973352240498 0.0422039683909638 0.9582981155189008  
0.8001753755221440 0.2601475715556587 0.9586106268673867  
0.0975388486165225 0.5444271096058346 0.4574707701973457  
0.2912877120074023 0.0514845176163770 0.7439643355659420  
0.5926019093698267 0.7600340565441472 0.2449564922508702  
0.5995806617812527 0.4032104544020812 0.2367668518877077  
0.2908554421980644 0.4086735567357327 0.7423475661547039  
0.1048078967449447 0.8940804353388643 0.4697713674794499  
0.7931888245443962 0.9072574737636118 0.9647220524067642  
0.7934567156465764 0.3945028830121090 0.9675105556294422  
0.1042901096448961 0.4102525876634409 0.4739592329920861  
0.3083473028760610 0.9182201069987311 0.7332326429853492  
0.6073314930841138 0.8938729016047273 0.2226046953950208  
0.5214331332821981 0.4459678973228218 0.5775805346077929  
0.3793445581255072 0.3511248456417686 0.0703991189185763  
0.0237956886136695 0.8611317921952417 0.1271492510213136  
0.8719405580814579 0.9366744654628635 0.6253085169940883  
0.8759076450731736 0.3628945234571765 0.6274058267292261  
0.0239310455810472 0.438643303765385 0.1279361347410327  
0.3678981123091702 0.9454170717447348 0.0798670245619835  
0.5213573398269424 0.8606735895699615 0.5670823561005102  
0.5177817918901099 0.3518497250573816 0.4320794974362950  
0.3898441982960247 0.4390019495570950 0.9170560088072890  
0.0137155137195337 0.9414921980665348 0.2896815935776705  
0.8787957684858569 0.8574673775891103 0.7889968229523849  
0.8819245812301227 0.4429402301349054 0.7909975108707161  
0.0190099464925833 0.3566957897646649 0.2902431802350305  
0.3452914495967427 0.8549882576598133 0.9339791989780730  
0.5152348373178335 0.9462312184558195 0.4104166004208757  
0.4559371474952985 0.4676719732474336 0.4080755574534565  
0.4355490133372850 0.3147672497320317 0.8974611801383297  
0.9628405803377259 0.8197870256071653 0.2955088918300232  
0.9390537575396166 0.9748870088586956 0.7883210489705478  
0.9373992568261885 0.3228143199495910 0.7939590694072670  
0.9609770472940791 0.4761574632419718 0.2949689748762084  
0.4391299865516006 0.9505542961678919 0.9160188395047538  
0.464218450497895 0.8249434834871398 0.3925518054121964  
0.4786980033610828 0.5208521043510114 0.7285744687937432  
0.4270463392707586 0.2700205319228682 0.2111234532737731  
0.9817832460417117 0.7794437704749592 0.9847038032951811  
0.9105301871445640 0.0209772723059206 0.4834469745932621  
0.9099232438517341 0.2746506001524082 0.4877659697213728  
0.9848476103794940 0.5222790945926105 0.9851175159204204

0.4119503700932121 0.0240483614660114 0.2231058493353187  
0.4788223925794067 0.7645968487171791 0.6952828731883911  
0.3942124380788162 0.4430420994702444 0.6269544818098192  
0.5088056478085013 0.3512336912364653 0.1129489547545478  
0.8977260310562167 0.8668721464322734 0.0722088304226492  
0.9975423147543642 0.9355249045938742 0.5681295669802763  
0.0011881687380678 0.3567807482028609 0.5675904206647921  
0.8977941352569287 0.4377594252014853 0.0726692381459658  
0.4948868173316407 0.9359300459675229 0.1383948168146815  
0.3940782476804870 0.8556704605424371 0.6158902573439619  
0.4846732035938738 0.3868739552880116 0.7458377486255626  
0.4233506071785899 0.4027330263150984 0.2418308441813034  
0.9915327553659864 0.9104122306055984 0.9470244353590844  
0.9037064244432453 0.8898654405758871 0.4439746104406792  
0.9078427347900342 0.4056374743387096 0.4453793800846311  
0.9905941947260493 0.3900883715832861 0.9491392652609235  
0.3956952055605540 0.8922153927271180 0.2548598486571929  
0.4851654270574516 0.8886313440890415 0.7545230434827250  
0.3001016161932632 0.5335069432376121 0.6756380035441111  
0.6015570669286269 0.2722909666399354 0.1944556076322795  
0.8164208955747592 0.7759925689023366 0.9945672439648250  
0.0832857492390656 0.0248471158680184 0.4949812144000642  
0.0960423353736330 0.2763185791548318 0.4947106909957822  
0.8106896225322547 0.5257522707426860 0.0011622216108916  
0.5821344638159955 0.0252861217212733 0.2082815194551441  
0.3051514205308274 0.7831926163257630 0.7142953066177065  
0.2730695301223356 0.4321654936428904 0.5494897987534582  
0.6336627108718061 0.3625309120487535 0.0547253906557830  
0.7741875865704666 0.8547310597206663 0.1427743163208911  
0.1182499433861886 0.9476177919642098 0.6493402452834647  
0.1211773057500562 0.3532307398114391 0.6511741943019156  
0.7755799108290482 0.4432617140596215 0.1496745829819281  
0.6120560269059759 0.9537356141820392 0.0467219596275925  
0.2658497302806176 0.862232325364406 0.5649689776263314  
0.3298628050857021 0.4405098463511253 0.3680356005289453  
0.5641554593690554 0.3395556465988924 0.8889721304235679  
0.8327214662610285 0.8178422925204856 0.3137119306889547  
0.0678101414217613 0.9829584827265139 0.8262607823548845  
0.0654075343986821 0.3159837805263265 0.8256027687302829  
0.8313227367242324 0.4779469979814371 0.3229183553292509  
0.5650121283576959 0.9652072515749003 0.8618123220005682  
0.3334754337527289 0.8293291077590319 0.4027174630602652  
0.2380302938038313 0.3502835065782810 0.3996158598967624  
0.6415337245391430 0.4479368740951912 0.8991292049899824  
0.7738671464695304 0.9370076992163237 0.3017915588341537  
0.1203597116505705 0.8607437384538774 0.8040321904559886  
0.1082029139816032 0.4411547280803590 0.8023363250861683  
0.7729217090296868 0.3582565849960406 0.3068602461536801  
0.6388840665915931 0.8571886526785337 0.9106418237484910  
0.2609805077391216 0.9426795541243305 0.4043086792288113  
0.3908043592572852 0.5325148202052917 0.2635322111033717  
0.5097312173238450 0.2552946535087997 0.7615147630361044  
0.9066442553881854 0.7547130855626842 0.4443345973354702  
0.9821872720756312 0.0455744926512927 0.9417964168085763  
0.9836168203520393 0.2549139493956751 0.9483000723201232  
0.9092966884447750 0.5413317141276573 0.4477731233281310  
0.4705453720523580 0.0233731718519232 0.7574258656675462  
0.3915775003790053 0.7559841848762939 0.2656447593327634  
0.7034775935847696 0.2442314477773745 0.3173861759533479  
0.1894660863283412 0.5479075037611875 0.8182933365500767  
0.1943492793706093 0.0579691435125664 0.3925616963384117  
0.6978804975442497 0.7378092916497329 0.9218710075853863  
0.6957993158740589 0.5690898654950584 0.9209431469518340  
0.2060728829114821 0.2233245558592489 0.4080820579881643  
0.1925625618501927 0.7477704141385375 0.8082279822433744  
0.6952636978806747 0.0432490353393710 0.3123638736175526  
0.5812880105823824 0.2391428331887820 0.3879559200562713  
0.3225350302845832 0.5540903206076034 0.8891902160258852  
0.0822912969618159 0.0557716255484847 0.2974769797940086  
0.8015959464191452 0.7483782823081708 0.7997128568940494  
0.7998861297917208 0.5488659509285073 0.8032009020315942  
0.0965832250541802 0.2477221161373506 0.2992004564835575  
0.3075620280520633 0.7301550005283474 0.8992756004198810  
0.5818708314383230 0.0624959798136071 0.4023011233294768  
0.6206297115502637 0.1475474257233260 0.2560530491704709  
0.2773014984056288 0.6539175898485605 0.7404654044287586  
0.1007821177559109 0.1493071001296736 0.4385498018898135  
0.7978491451592813 0.6506627469856229 0.9379904905485199  
0.5243570757395449 0.2508235635538160 0.5646563226181949  
0.3728154243932138 0.5243020361354466 0.0686982368415626  
0.0142390297325848 0.0246454049694136 0.1331185278888011  
0.8745317353121993 0.7711833881333406 0.6367809391476303  
0.8764780779946409 0.5289441412052797 0.6403276971532684  
0.0188820895955510 0.2697707260776980 0.1395177401307912  
0.3643268706006016 0.7615087916945497 0.0729007780444251  
0.5150359920068633 0.0278089163272353 0.5687924916248276  
0.4481932513554485 0.2395759814344746 0.4042466469901204  
0.4533211977095651 0.5550114451681250 0.9203344717297340  
0.9507295668656934 0.0590005505532830 0.3005943328938845  
0.9335625740988513 0.7364441022928181 0.8083432996735163  
0.9291381823391689 0.5670571602113108 0.8150884746573134  
0.9655714680602709 0.2352452947783790 0.3153902861158547



0.4377285603165610 0.7606887737318161 0.9070832747318728  
0.4506237305998849 0.0637527062900431 0.4048419260349924  
0.4948111492299173 0.1404951764164770 0.6706034815787275  
0.3882228706705368 0.6439608997364492 0.1595582502075922  
0.9962935979397050 0.1487446230150636 0.0658446907709099  
0.8937158783419914 0.6491750927095190 0.5620672643431582  
0.4039515546383223 0.2371275021384517 0.6423616461255554  
0.4908971375449512 0.5605808805755089 0.1403799166671001  
0.8935844181081344 0.0658680764389223 0.0880971896814386  
0.9960193270346682 0.7321501551598742 0.5879209775343910  
0.9984378363204091 0.5691582285508731 0.5881340518553619  
0.8952379731494121 0.2341419083168156 0.0936619162883206  
0.4873454790575922 0.7316140640849623 0.1318633849850431  
0.3917696966942751 0.0658472243623357 0.6123846836174318  
0.2962772115641465 0.1581517445749619 0.6266271258697397  
0.5912118557930338 0.6488131261491856 0.1321179550830484  
0.7917219538489212 0.1509185060461795 0.0738244031838501  
0.1029771992223720 0.6522426923152034 0.5736258897901496  
0.3013525587662793 0.2740558685859447 0.5306013426213418  
0.6010617915256715 0.5277757064449125 0.0460632922824354  
0.7763250358348019 0.0292075393045077 0.1559577293547893  
0.1129070971150211 0.7735467565729631 0.6541095945624410  
0.116373556145421 0.5300429863704681 0.6539395160467417  
0.7765256070033956 0.2721452652889298 0.1548095234095562  
0.6001556220412031 0.7701663810000542 0.0473899317676008  
0.2723861458461746 0.0357849195083696 0.5483600810655146  
0.3247619919179995 0.2562100737594078 0.3359200320440011  
0.5755819813708228 0.5606244809288125 0.8525898914670293  
0.8227406474368856 0.0584056543627582 0.3413392480977349  
0.0635300847128860 0.7417553504819651 0.8356901325090591  
0.0594130177660252 0.5632314942138305 0.8282619320650026  
0.8340604163793125 0.2408081938979086 0.3297779669311217  
0.5768726335179997 0.7447699722929823 0.8508837996635179  
0.3224247423082197 0.0578258772071218 0.3639708700111863  
0.3961856888420743 0.1502402678952439 0.2766710426728082  
0.4858236868755764 0.6475812932639551 0.7829614930222780  
0.9008465814905108 0.1479501573411957 0.4299854117534429  
0.9918451257705673 0.6515520535487381 0.9356144359972807  
0.5198070585668133 0.7074387119818598 0.4933142728418462  
0.4092415057386778 0.6368917161450063 0.5971313318338717  
0.649567774282897 0.7007278528279839 0.4939586092704555  
0.2441051389005985 0.6822147963457927 0.5397850567506204  
0.5912249325597584 0.6583764712150396 0.6547922374726334  
0.2675155744118795 0.6046167181133770 0.3901088653989523  
0.3151004620153013 0.5799989286467867 0.4639565133003046  
0.4499247335677691 0.6211464625586295 0.3978716677146040  
0.6227298957146914 0.4695429003495413 0.3002345345458950  
0.2706439093649440 0.3378114361586385 0.7975468805969864  
0.1239584996423706 0.8277566118529438 0.4042721212576122  
0.7716286744009545 0.9740284719222699 0.9014709898911921  
0.7734626105152800 0.3280230182758817 0.9021053343186495  
0.1235126148909365 0.4746726332597991 0.4051711862038702  
0.2753385454886632 0.9795387507626151 0.7981312720068775  
0.6242201750777184 0.8286440772274731 0.2919875541100404  
0.5212023072903822 0.4322202801011077 0.4569709198674425  
0.3777467852030198 0.3607229583230352 0.9487295079809149  
0.0233881436087513 0.8642316463424878 0.2493663083348332  
0.8738158794988479 0.9350049574604433 0.7477862289842873  
0.8753697130224470 0.3655361667696516 0.7496521243245070  
0.0236622268654412 0.4344589900844353 0.2500257284381687  
0.3657558729907021 0.9324054063827850 0.9593626678319396  
0.5234179174186124 0.8673055811897001 0.4449595565043709  
0.4696302221126169 0.4494169439418323 0.6711797518934238  
0.4342865021941224 0.3438223527353873 0.1591121895322495  
0.9733842203097000 0.8545114177111306 0.0317886877833211  
0.9213281393998671 0.9458170995181563 0.5292450420637244  
0.9242126228651378 0.3498784101293198 0.5313041361716972  
0.9738049928480765 0.4474586115178905 0.0323582936865179  
0.4185865419202858 0.9492368522468960 0.1745038971393876  
0.4694059153798661 0.8427790498713649 0.6565528863852382  
0.3156294576320234 0.4540729416928168 0.6477547462592159  
0.5857688764955838 0.3472547217509745 0.1501580580355531  
0.8205969881463353 0.8512566540840870 0.0430899918979729  
0.0755775263419770 0.9506555043368075 0.5459098021717164  
0.0802361268470431 0.3487866511970931 0.5464025164476408  
0.8195510021298987 0.4502324806657156 0.0477130018032500  
0.5734398609640515 0.9521368588565299 0.1537201249907426  
0.3178943091249055 0.8546261909893189 0.6577761917807785  
0.2628905900609477 0.4259962872249355 0.4287894242085651  
0.6326432218038460 0.3692738609798583 0.9323223800629419  
0.7711500304237283 0.8586478352270558 0.2650313419985931  
0.1255815870133252 0.9398372923778989 0.7709215532897065  
0.1215396615284782 0.3627158334815895 0.7732312942696333  
0.770594880836580 0.4370440624546715 0.2718543842146594  
0.6263000431415574 0.9371638628434465 0.9286131160846220  
0.2662905446487794 0.8646347783342748 0.4419990382243336  
0.4005594129473449 0.4604791298507592 0.3205788037702991  
0.4986952854032005 0.3251062827670468 0.8230632811656033  
0.9016983624104080 0.8219920047878436 0.3751892413681889  
0.9949184138115411 0.9774591618564317 0.8766424366493533  
0.9941630914586606 0.3221725154035079 0.8806589639808945  
0.9022417537834854 0.4741757065558358 0.3788373750170188

0.4898750993997948 0.9568963259220157 0.8220628637457363  
0.3963731438377545 0.8262775264869500 0.3273649517070476  
0.6268203911041194 0.2264026527456254 0.2888544485056343  
0.1158410893857904 0.0714973270719733 0.4067981975075635  
0.7770861476765839 0.7283952204265662 0.9139694022036979  
0.7757539877749040 0.5731266474587816 0.9157818106758721  
0.1252721124454209 0.2250542018907222 0.4098042207702784  
0.2703850739462336 0.7293954620763472 0.7906012254792558  
0.6201953563317942 0.0695770055056622 0.2941548012909441  
0.5178962193555066 0.2706039391544553 0.4463840504077091  
0.3823585388138119 0.5187772478538611 0.9465767101625086  
0.0152647737159636 0.0203683947101284 0.2556961130890402  
0.8720668228114327 0.7781409121097750 0.7592006707708426  
0.8715380984209342 0.5220981435181634 0.7624477483161157  
0.0251281949266591 0.2770134606493971 0.2613092276215584  
0.3656430132562907 0.7760785510352158 0.9519576277882540  
0.5161641091458200 0.0249310069660753 0.4460215574727971  
0.4822323934106924 0.2207714592325869 0.6589902940503797  
0.4115601876136705 0.5658736194017455 0.1556819107575797  
0.9710382466030946 0.0714453707539167 0.0562982572839891  
0.9179219603311251 0.7269045096688265 0.5574073234328473  
0.9198242173025359 0.5719532487589122 0.5594270799825150  
0.9728367317015674 0.2268811716729051 0.0615674937865786  
0.4089044971452487 0.7230729981723649 0.1568510738589520  
0.4679496380605250 0.0645810964738194 0.6523658723815050  
0.3239151710814123 0.2351548527589803 0.6329456734262977  
0.5704781547058666 0.5697033019578548 0.1408548210833966  
0.8145009793373694 0.0722711030446425 0.0689193504395508  
0.0748930207394374 0.7300933350049428 0.5678906109074279  
0.0776281197789323 0.5732637756219429 0.5688862487009283  
0.8162616099580979 0.2290833648088684 0.0694785689490811  
0.5674557584366703 0.7272284000011255 0.1388029288784013  
0.3133286113287905 0.0780845164133786 0.6330843388561811  
0.2683819069347323 0.2748378027939031 0.4186644947240761  
0.6277446214505255 0.5262085362477312 0.9302293353049028  
0.7675368824163266 0.0171512595891492 0.2771481197503495  
0.1222050036022158 0.7809321135078600 0.7764511434272596  
0.1199923551968783 0.5209697832126592 0.777785367773639  
0.7717652663050230 0.2787015688542247 0.2775112729272686  
0.6271167561362020 0.7769412963196166 0.9315881248832124  
0.2631314704991017 0.0232571334917636 0.4276184166817825  
0.3988497963992482 0.2292262749126430 0.3080258600992480  
0.4981497095780287 0.5708590689927754 0.8212725364774933  
0.8959480742688494 0.0708428301700612 0.3888531742649260  
0.9927900844121289 0.7280552553515670 0.8910429086271618  
0.9918065236663778 0.5747726408554049 0.8915262704297455  
0.9023413906254647 0.2255636452693966 0.3903431157363436  
0.3950740192937769 0.0730665162790187 0.3172168820593174

Structure H2O/5 S=10/2

1.0000000000000000  
20.1473052208877697 0.0000000000000000 0.0000000000000000  
0.0000000000000000 19.7681594983396742 0.0000000000000000  
0.0000000000000000 0.0000000000000000 13.2309279702280254

Al Fe H O Si

2 2 8 199 94

Direct

0.2692977631742636 0.5709238694393417 0.7939867791013854  
0.4951287618030227 0.7323747965091114 0.8168993379807106  
0.3161012717204688 0.6215758987212335 0.5954978801299794  
0.4893139376577932 0.6706320444793215 0.6170172185115468  
0.4801985897399102 0.6565082010142020 0.4345044734657718  
0.6472225293791032 0.7491810202814414 0.4740527958193495  
0.5993780047569282 0.6884458076623629 0.4566423959692121  
0.194955353215168 0.6707182325488659 0.5687651224603893  
0.2375187122083615 0.6627983244636888 0.4685919346347694  
0.6062606603337588 0.6849122778594174 0.7154327251198808  
0.6202155402537803 0.6811602853901073 0.5929252997809039  
0.2423261169034329 0.5647003361642626 0.3780279303086871  
0.7038605225857681 0.4740739622334693 0.3115767382833002  
0.1924376442986946 0.3366198884427326 0.8175629050568477  
0.2045914066466971 0.8235401092884395 0.3961402323848591  
0.6921412112421703 0.9782711808846037 0.8893937798431434  
0.6940546549533061 0.3248742344355690 0.8876417129178424  
0.2061708651101330 0.4807972577588912 0.3939245167715387  
0.1965002732459867 0.9688171320161498 0.8081965178891178  
0.7041958694187866 0.8229468341550398 0.3027747687105367  
0.5918291046956663 0.4629819411501653 0.4146326775021159  
0.3063724476040537 0.3367011034861442 0.9110816297877934  
0.0938899923512854 0.8347990840643073 0.2908242934770036  
0.8067576223899687 0.9709488977465358 0.7899213433067828  
0.8069002841862263 0.3324150061201746 0.7899610490801700  
0.0941157005342224 0.4670392727558708 0.2924168887731311  
0.3098835493261307 0.9814638631363957 0.9086519713632329  
0.5951799069358898 0.8394387460476916 0.4050308164975963  
0.5974023684952319 0.5388032116971984 0.2486365586803770  
0.2944897787702476 0.2738090478456805 0.7339378167172310  
0.0948636166531257 0.7601415125242680 0.4572524939287729  
0.7968362273332842 0.0430510970415323 0.9579780677014077  
0.8008396666772808 0.2607102639813038 0.9592633025803099  
0.0975590566191850 0.5437534020410151 0.4574418090024639  
0.2903705097930934 0.0518785262227877 0.7431402789685652

0.5932183049821785 0.7614395034312512 0.2430924666657292  
0.6023622685113678 0.4033878368773554 0.2382922703169960  
0.2918506114914386 0.4093728094675909 0.7444388653176257  
0.1046633639517736 0.8941657905269403 0.4702617733562072  
0.7936091381806638 0.9080045711092014 0.9640783728635099  
0.7940293296842285 0.3950855079780382 0.9663130774135311  
0.1068804361406290 0.4096959267191007 0.4740012081416917  
0.3092235076852612 0.9190668419608992 0.7315902409906689  
0.6070535037604573 0.8956210353969856 0.2226967397312775  
0.5221527165156213 0.4457706101524859 0.5801077799861130  
0.3793327377679930 0.3540975566675250 0.0746728322756596  
0.0238005160680420 0.8614561532535248 0.1272664458414333  
0.8722306064040191 0.9371791399444921 0.6252387395001439  
0.8762069199316838 0.3631324582193235 0.6272421589611666  
0.0239573774297507 0.4395042987708901 0.1285648136897415  
0.3682886051423680 0.9434760601131663 0.0787608698776238  
0.5219739630037485 0.8605563486852391 0.5659235874398154  
0.5141093649786167 0.3536815460205589 0.4324827909980640  
0.3905828859439794 0.4405483831262290 0.9198205928567327  
0.0140578862388704 0.9419559823010325 0.2897539860766616  
0.8788736102827917 0.8579463282234117 0.7890160307754109  
0.8816121575286289 0.4432381535618740 0.7907503247396647  
0.0187053246953390 0.3571553800016189 0.2902115540520098  
0.3466306103788254 0.8556812189055936 0.9288198116147247  
0.5144468382677851 0.9459464337947283 0.4083966638249805  
0.4601173949139373 0.4743819892989138 0.4095895789673368  
0.4358168119568559 0.3160435495364761 0.9023007712966697  
0.9631434116335281 0.8201557256592552 0.2958510122257256  
0.9396104967639458 0.9751107713136097 0.7881506227722465  
0.9382025578039820 0.3236610145600230 0.7936408544556776  
0.9631299053825919 0.4776219976149092 0.2974697679947277  
0.4400873669435287 0.9514486923822428 0.9152122413775313  
0.4648259623275582 0.8229161520397860 0.3940984338280456  
0.4783991752647805 0.5202360715062735 0.7306549579466101  
0.4271959191357946 0.2746086208807898 0.2168443326480831  
0.9819097486280195 0.7796904442424798 0.9847034708016082  
0.9102631107261527 0.0215903504490034 0.4832199127171565  
0.9118889787424628 0.2753054269552088 0.4879640332359201  
0.9843754275731011 0.5224665750300039 0.9852278068771146  
0.4104199815906241 0.0248542939207532 0.2202058796717487  
0.4807226141310624 0.7633983223123614 0.690057591137977  
0.3942291911136515 0.4435634907493822 0.6270174724795914  
0.5086848977697633 0.3546864081610210 0.1165746490663165  
0.8978237461729910 0.8670712659372264 0.0716854381810492  
0.9977745769756572 0.9367345220257809 0.5681632574971059  
0.0015805041802720 0.3597315802066464 0.5672236315706819  
0.8977101337524659 0.437960009883949 0.0735470549031037  
0.4952829075703263 0.9378214803222581 0.1369003837738542  
0.3944350275140928 0.8550124042304014 0.6153098884114302  
0.4832284321568303 0.3859038592421667 0.7469639042010893  
0.4240120263735437 0.4079884553451052 0.2452975757920410  
0.9919319640040343 0.9107586182896205 0.9470257081149839  
0.9042043076469064 0.8903344731848333 0.4441301961271457  
0.9071495921104767 0.4061557863573309 0.4449228189985102  
0.9905957021398811 0.3902247561436671 0.9500772070335837  
0.3984071652187324 0.8929887677349131 0.2558214277384409  
0.4852694045291809 0.8879323894236193 0.7536929090008700  
0.3001020670953872 0.5341979472040095 0.6772838809582366  
0.5999944355279798 0.2727964928226271 0.1962062932897166  
0.8157674513899988 0.7765307716396670 0.9944565361779001  
0.0839983471532481 0.0252643231352938 0.4944122086205539  
0.0942744967430229 0.2764118828286481 0.4957248129088725  
0.8110597416488264 0.5261774579537309 0.0014145140533155  
0.5827159869975179 0.0268938799956990 0.2069822660033038  
0.3043413238379627 0.7837225465195091 0.7143270027046039  
0.2723521633575270 0.4331139261332311 0.5517193972952855  
0.6333587159358609 0.3613054158978477 0.0554586244532261  
0.7743080087297136 0.8561899176643692 0.1422711001193038  
0.1186201116664180 0.9485421065063793 0.6492587894851656  
0.1212416264944054 0.3529511396695002 0.6520537396622679  
0.7747127320160571 0.4429351062490027 0.1483382985852986  
0.6124121911762549 0.9545231548965223 0.0456477700649286  
0.2665921044278193 0.8627588364776534 0.5638901883957550  
0.3330821019720026 0.4456912795860035 0.3746791552880581  
0.5645399844209243 0.3393024770855652 0.8885003342884445  
0.8330266761546367 0.8192661516178322 0.3128943955439153  
0.0683239969650428 0.9837653182673676 0.8265125899450556  
0.0660875743339130 0.3160573039022280 0.8271670426307159  
0.8329695318760854 0.4779124636389742 0.3189027477891258  
0.5656194866745666 0.964925959232914 0.8599096416217069  
0.3340547906069409 0.8298486636477118 0.4012710289850263  
0.2420780389645672 0.3523790699264978 0.3977621462156841  
0.6418990322148654 0.4476066712394854 0.9016676474923242  
0.7736828443274899 0.9383078685523628 0.3018580451505644  
0.1186560043412005 0.8610955153412129 0.8031886403210440  
0.1080907225100476 0.4411459062088759 0.8026713276906340  
0.7715069564216980 0.3593661481590880 0.3071123150051941  
0.6397325867359188 0.8575830040362337 0.9105787215444191  
0.2633273349501207 0.9440651438207208 0.4037198990034110  
0.3935652487783476 0.5385923961997414 0.2683414295494225  
0.5074188139267658 0.2543527109454437 0.7647602969285804  
0.9058313094381004 0.7550603672220290 0.4437391266078520

0.9823649037020225 0.0459276176241827 0.9417110537893778  
0.9833209645558926 0.2551582329161719 0.9482881374546426  
0.9074072248952553 0.5419598556088471 0.4476878605623509  
0.4710740154279485 0.0232218855676138 0.7557080453337892  
0.3929502393674202 0.7565339273812351 0.2643493898749067  
0.7035098461226410 0.2446253808452190 0.3170506736652149  
0.1890052885082951 0.5477862380609956 0.8185154787667446  
0.194608969973843 0.0581711748770764 0.3908394008976929  
0.6979109606570298 0.7377382016905150 0.9198430574333279  
0.6955829373202316 0.5690157272474701 0.9228470508799873  
0.2056988291889734 0.2261984711779254 0.4103065366298926  
0.1924603810028349 0.7496402055547109 0.8103301502878485  
0.6955214744259715 0.0451875390722612 0.3115885567484307  
0.5825191897754367 0.2428310825744945 0.3913081385911983  
0.3210121418130537 0.5542755611737175 0.8928374342572860  
0.0821824553563792 0.0566445025224499 0.2971801118098619  
0.8020612541456966 0.7485802727346910 0.7993844953237585  
0.7992274616282133 0.5488965276018906 0.8036222932961574  
0.0965076261014486 0.2484435390764294 0.2999537985486506  
0.3078954543575715 0.7307490721455081 0.8994767788024640  
0.5820565233654701 0.0614041526330163 0.4024044251956017  
0.6187345922401243 0.1489977823406045 0.2593492711792546  
0.2749807287172556 0.6543177479637912 0.7422674283597641  
0.1016529723419207 0.1497895060418439 0.4386556785774678  
0.7977236774687959 0.6509316570845481 0.9379592565252705  
0.5246919497217376 0.2540581134862074 0.5676807313256491  
0.3736154213872961 0.5249808368082044 0.0724306618443410  
0.0142049261031934 0.0248709998434559 0.1330429274149095  
0.8749139660626762 0.7719545363747692 0.6365329369631326  
0.8755908358233765 0.5295631180885646 0.6404764709725850  
0.0195186167957960 0.2701544098812285 0.1392816518406058  
0.3670054147425204 0.7656697940179690 0.0708211626873446  
0.5136534726605262 0.0272866809347672 0.5670939438053322  
0.4495858875366311 0.2381400235183172 0.4068687949634315  
0.4518704282921724 0.5575485200812651 0.9213919164082811  
0.9507417333193745 0.0593857539389281 0.3004918144777268  
0.9338303425012865 0.7369065748500786 0.8080835560348700  
0.9285598983352558 0.5673478221633923 0.8152108553963116  
0.9652888830999513 0.2356125246227012 0.3141767265850157  
0.4382333352084736 0.7601535643667653 0.9025763967586493  
0.4505774893330756 0.0635763118867521 0.4019586112861923  
0.4962717150188795 0.1408384985205040 0.6682560944487054  
0.3865417029944710 0.6465042687190153 0.1543028003384633  
0.9968010700140956 0.1490615619238245 0.0658312292527417  
0.8938882938195315 0.6497519817483079 0.5624345817158453  
0.4039541508275207 0.2363146542740678 0.6412232678457397  
0.4910580642093218 0.5648839830928132 0.1405815497553652  
0.8937482419838922 0.0665743895623873 0.0877133742591881  
0.9960844475646141 0.7331820223712834 0.5860976726199240  
0.9977440325341279 0.5683286141827842 0.5870539421653708  
0.8957182759756898 0.2342591369337089 0.0944830792886419  
0.4884820484579084 0.7308170717310042 0.1311664101783532  
0.3915102419226396 0.0681031541205864 0.6129894959913301  
0.2950933469834881 0.1595268797800962 0.6281580632945185  
0.5936956930000501 0.6490765302746223 0.1343203046217779  
0.7918193362216369 0.1515942520561174 0.0742113763388476  
0.1018447474208040 0.6518724912146474 0.5730439811269158  
0.3001220525451095 0.2763681983411079 0.5343741821025245  
0.6016326019152777 0.5273635529224000 0.0493936910874681  
0.7765244743496335 0.0297970821207871 0.1555210060290591  
0.1130616253383941 0.7728318283007732 0.6544563440122004  
0.1157297815354223 0.5299363217891028 0.6540366212299378  
0.7772982260875861 0.2728852743382554 0.1555793592962053  
0.6003014332126371 0.7694817268623740 0.0450164074192103  
0.2727979549559287 0.0377965586704774 0.5468635295721304  
0.3255554128512692 0.2541203204477820 0.3406824196069143  
0.5748932910316324 0.5592089536582526 0.8560086428413326  
0.8228285842172151 0.0596810605014636 0.3409179188771653  
0.0635812844027141 0.7414507584143850 0.8359764936148942  
0.0588215720925357 0.5631207201472404 0.8281443232657604  
0.8339532776593073 0.2426113755320568 0.3318379405610781  
0.5774611091167260 0.7461666373429062 0.8474176424514646  
0.3224141843512462 0.0606398060286131 0.3620807535280118  
0.3984872228106707 0.1516755266676426 0.2741734174866483  
0.4879596405940736 0.6467596593754189 0.7811959638042768  
0.9010875754052398 0.1487317303238751 0.4298468034965909  
0.9914388069870890 0.6516692530527749 0.9357001185978434  
0.5149858004673624 0.6709734214975337 0.4809348319681078  
0.4026514730075421 0.6451067077550515 0.6086620381321732  
0.6442589454483336 0.7002973927340420 0.4831420780450872  
0.2389427864883838 0.6807429937458285 0.5400118625275043  
0.5911672409410441 0.6648162016485750 0.6517740894640943  
0.2678727551956638 0.6072215999198167 0.3880761432333643  
0.3171114048092052 0.5854808163320849 0.4614590081254767  
0.6238491061009056 0.4700166374987694 0.3021713331257067  
0.2716186374438704 0.3387793058201717 0.8003129629618592  
0.1245050360103129 0.8283082705603083 0.4041889938504701  
0.7719973757689864 0.9748009158992779 0.9009900106928581  
0.7739186814023676 0.3281975591146213 0.9020099143505255  
0.1250130613473385 0.4745333430004602 0.4051964430673732  
0.2756674605838735 0.9796609675653954 0.7973334095779904  
0.6245677291950861 0.8299341830001237 0.2904540693911520

0.5222828836477600 0.4336117307736510 0.4590392377600752  
0.3780097521930287 0.3625727518151117 0.9527017568766476  
0.0235865912818629 0.8646302141436272 0.2494907792558304  
0.8742176257116607 0.9354705282449451 0.7476827144638447  
0.8756863674780705 0.3657805586479387 0.7495085602141605  
0.0246007615741068 0.4349917457887619 0.2506254766663742  
0.3665957755229105 0.9326385829189076 0.9576015570007879  
0.5234848855511600 0.8676153116016868 0.4439842894925263  
0.4693852830022534 0.4489377685676822 0.6726870608856257  
0.4342715388763211 0.3481445497075080 0.1638262567069150  
0.9735821314805982 0.8548050518377648 0.0316623812206064  
0.9215378685623945 0.9465222926393650 0.5291708319260703  
0.9247015947782689 0.3509259914212760 0.5311221437136014  
0.9737109231608271 0.4477641990990882 0.0330078312707131  
0.4188740276848583 0.9496894109505930 0.1732952178606122  
0.4698696078453297 0.8419949485745365 0.6553821699716227  
0.3157164973431962 0.4548268119219426 0.6493805382991948  
0.5858123938250869 0.3480716987397521 0.1518834328217873  
0.8206332076199907 0.8518821768648995 0.0425447263360246  
0.0758812291839994 0.9512911071099761 0.5458454411733930  
0.0805227892671147 0.3494834414354627 0.5469985719946454  
0.8196095552194633 0.4504707675621770 0.0473818065261782  
0.5737745769177578 0.9537193185766920 0.1525866835774500  
0.3182002408168190 0.8546984963405378 0.6572738963841096  
0.2649249802646115 0.4281049880617717 0.4303079906043515  
0.6327985994454769 0.3687067313368225 0.9332095347835732  
0.7714411434557487 0.8600469761929819 0.2645160617962592  
0.1255960572787468 0.9401123126258971 0.7708166925323238  
0.1220074834774210 0.3627627529706425 0.7740853055846506  
0.7707432481760607 0.4379110612155245 0.2707177729158679  
0.6267842889273496 0.9375582673361181 0.9275944171875535  
0.2672316625545193 0.8658080528448432 0.4410265626782364  
0.4028025652664890 0.4666345986959871 0.3244076649795741  
0.4978822648049515 0.3248560143447602 0.8253692686271981  
0.9017578803542521 0.8226120168238072 0.3750696472496091  
0.9953549662202120 0.9778260530684918 0.8766421817149922  
0.9944773006817836 0.3225392885163318 0.8811160097748828  
0.9026481450281955 0.4748024541685396 0.3783290220348499  
0.4903796425238108 0.9567002735937096 0.8204483031106414  
0.3974429699156212 0.8264614958170690 0.3270936704691293  
0.6263029515009884 0.2278859934993410 0.2909365925852032  
0.1162563635827977 0.0720486511040544 0.4061979267956098  
0.7771764715112957 0.7286359877161572 0.9133720910147479  
0.7755121784289648 0.5733469569165403 0.9163214023483847  
0.1249766521268010 0.2260427670467279 0.4108142040776276  
0.2698439097964600 0.7300263113263951 0.7913187124772046  
0.6200849986755229 0.0705252914673041 0.2943811247835273  
0.5178486494918155 0.2724598370754919 0.4487733780711184  
0.3817790681120364 0.5201943359668588 0.9498929167260431  
0.0153238898294032 0.0208125510685781 0.2556269655735900  
0.8723799574940037 0.7786335120220162 0.7589219567140553  
0.8709259180495716 0.5224139755841677 0.7625748733068072  
0.0251770632238677 0.2775201790418494 0.2611681067424872  
0.3668702749905863 0.7769787499182548 0.9489674211579672  
0.5155460759201427 0.0247042018365133 0.4444993742836690  
0.482287763369447 0.2211979833010925 0.6598192493720073  
0.4116263806504004 0.5689837099890942 0.1581060331102564  
0.9712604855095345 0.0718551751899986 0.0561611785194466  
0.9178123883243404 0.7275160336625601 0.5568090250111341  
0.9190135161690119 0.5722352649505168 0.5592994490599190  
0.9732164382087001 0.2271677475825493 0.0617282303252664  
0.4095782953186646 0.7247124965684922 0.1543704881097584  
0.4679637959492883 0.0652078288452571 0.6513438042162782  
0.323799988824516 0.2361335320067007 0.6350593795214572  
0.5707895630887847 0.5704368265901983 0.1429268053228679  
0.8146756115961750 0.0729906759410551 0.0686158753707995  
0.0750258311673685 0.7302593846038536 0.5673593417292205  
0.0769561026340846 0.5726842641727138 0.5685156716064527  
0.8167487730916964 0.2296487530355971 0.0701585914504016  
0.5685567501632149 0.7272010534556863 0.1376755500885214  
0.3128673183062631 0.0795438983566384 0.6330751606646698  
0.2690750257156234 0.2762274226970339 0.4210803709638181  
0.6278233224344643 0.5257216196847401 0.9330815736478695  
0.7676505097337429 0.0184188923280158 0.2767876318015799  
0.1218710215933511 0.7811720507724036 0.7767225253541524  
0.1196057533593033 0.5209855629067899 0.7779343188568296  
0.7717022739362577 0.2797032579256169 0.2781519789432100  
0.6274281758699235 0.7772115207009421 0.9294747713959478  
0.2639497129895887 0.0248126359715652 0.4262236084756843  
0.4000028319311439 0.2299444181296423 0.3103692364365369  
0.4980528234874366 0.5705656728845756 0.8230465635493508  
0.8960405141721817 0.0716224106591053 0.3887051728573983  
0.9927749548058762 0.7281680748148174 0.8911482559441368  
0.9913189780578863 0.5749013203152914 0.8915522675419860  
0.9027297031508326 0.2264398125684118 0.3905668021437711  
0.3951694039782859 0.0743894019055426 0.3144649240948144

Structure 5 S=10/2  
1.0000000000000000  
20.1473052208877697 0.0000000000000000 0.0000000000000000  
0.0000000000000000 19.7681594983396742 0.0000000000000000

0.0000000000000000 0.0000000000000000 13.2309279702280254  
Al Fe H O Si  
2 2 6 198 94  
Direct  
0.2705812484287051 0.5706349497885712 0.7872340669989445  
0.5004725885812373 0.7300139173891470 0.8173662772299451  
0.3239299579277510 0.6281852447954429 0.5979894580557066  
0.4893609705417902 0.6705811459322667 0.6182511224666282  
0.4692596436681021 0.6068311842171942 0.4664045899838214  
0.1910275804315942 0.6522696204404572 0.5590217693460298  
0.2408778503946599 0.6457546383093006 0.4638149505587366  
0.6152005228477626 0.7025569337298868 0.7002995275612783  
0.6281144062415300 0.6936290221778352 0.5832476061791362  
0.2981156982504912 0.5653532340970834 0.3526110074568615  
0.7014980252921299 0.4776848539475900 0.3103735368384701  
0.1919694394094154 0.3329939021279641 0.8126350149311500  
0.2073720632996051 0.8221995202143371 0.4019927012705369  
0.6948335810244162 0.9726531317954054 0.8873357979093135  
0.6929976286770696 0.3201709131443944 0.8909785939401458  
0.2041878835285055 0.4794653620843224 0.3893624766321139  
0.200598099010692 0.9644124765887839 0.8108607819184224  
0.7073133568760895 0.8199215627338146 0.3034654054902390  
0.5892414313743488 0.4657793149523052 0.4139739159082982  
0.3047608549673690 0.3440831655921861 0.9080102499446554  
0.0970283443370961 0.8343801842010057 0.2967595238572617  
0.8111797940408584 0.9741367944845206 0.7935855782298677  
0.8048833642740360 0.3329383932959498 0.7883380627216749  
0.0915581316065768 0.4656164317863219 0.2917234829007366  
0.3137372436293370 0.9811768121183402 0.9086021148148661  
0.5977485383527965 0.8398770394030080 0.4058400177953479  
0.5917681055344943 0.5387969421128166 0.2467074671025132  
0.2991660547972284 0.2758971928846949 0.7357905124754454  
0.0982213381019558 0.7581288391379650 0.4627573967289715  
0.7938654368392909 0.0434147921159213 0.9622739762436521  
0.8041265740257310 0.2621442766975742 0.9586173879856875  
0.0970286107057185 0.5386359290985820 0.4605743786301018  
0.2892785828841919 0.0525121238045949 0.7427476561205871  
0.5961893325676362 0.7581969339017868 0.2480033596536064  
0.6020199717495310 0.4038504630779858 0.2395730986830888  
0.2859387597964245 0.4114752625295701 0.7353647347935293  
0.1071872588874017 0.8924624213726305 0.4766187429077399  
0.7988579199873663 0.9081288192957104 0.9650177861012958  
0.7901768584191868 0.3967292174154668 0.9611517616047868  
0.1094229864801713 0.4039435777193128 0.4687411510712653  
0.3148360562404576 0.9216026525691088 0.7294686574866275  
0.6105376333749052 0.8915299209186924 0.2203882807578130  
0.5241588029337153 0.4395196633764405 0.5808903926120718  
0.3777877454799721 0.3573682093096910 0.0728290280966749  
0.0273859930048102 0.8615256395863787 0.1322309829990624  
0.8752655647355555 0.9379424181570062 0.6286826717187940  
0.8751093125728683 0.3635870894580631 0.6278595228071565  
0.0166075952751081 0.4423458572608220 0.1319269675846476  
0.3712589009259286 0.9404503368620879 0.0796194458093244  
0.5278394693393033 0.8639024222830243 0.5682505379512737  
0.5169989120359417 0.3531421914655558 0.4255826961956390  
0.3943438687567438 0.4426427112793795 0.9168677744704569  
0.0194013908040876 0.9435599226655613 0.2931880325746046  
0.8777358761510780 0.8585029473080894 0.7926117250423226  
0.8788009248966165 0.4450937179999823 0.7896902493020378  
0.0121988130511169 0.3582946785590875 0.2910547013526626  
0.3544282533375027 0.8555234132925063 0.9251790806769934  
0.5154483774863080 0.9451376869213418 0.4069535094994278  
0.4558413868818132 0.4696476427437818 0.4160523453765525  
0.4331457478034803 0.3158012099193477 0.9014200606246662  
0.9666395868732853 0.8223295958435474 0.3014529380080087  
0.9444094898204749 0.9726702953212493 0.7905726943191191  
0.9364090896010452 0.3257496810055353 0.7956907643282214  
0.9621594550267701 0.4813883161324072 0.3065148844335231  
0.4439318070178304 0.9548952735019919 0.9178435190409383  
0.4672657273429285 0.8212414205428815 0.4016277207129638  
0.4794624149847052 0.5184433905325170 0.7265066304167608  
0.4224231258451853 0.2726209210557714 0.2118600140543204  
0.9829011096357426 0.7789708096780044 0.9915739745070344  
0.9135523715980732 0.0252715522618225 0.4904352276424537  
0.9114254170085268 0.2770726105541957 0.4871001720072800  
0.9749490788045364 0.5242610654716854 0.9876900649092757  
0.4141097980025015 0.0216784598753637 0.2204785132859048  
0.4932553367191816 0.7678471332935923 0.6952758999495149  
0.3972460410891506 0.4349151111530439 0.6326778300522906  
0.5057075512217274 0.3575643823930555 0.1216125111830815  
0.9007937921290228 0.8680058938210060 0.0784157447731537  
0.0007701180945961 0.9386447258204418 0.5707272859220851  
0.9995794303004527 0.3641702124238151 0.5627368871877548  
0.8908058394023642 0.4381824214378994 0.0749748003852043  
0.4988200401755513 0.9350302333588810 0.1352586942133752  
0.4016104506112415 0.8547116154373915 0.6213138067156654  
0.4908983696018296 0.3858446341898948 0.7540543594217348  
0.4159978776576754 0.4028783023767078 0.2522834272433843  
0.9947034703974370 0.9095476427741268 0.9516197502741222  
0.9063682685995929 0.8948859646189153 0.4455543642472247  
0.9008249912026989 0.4082367237048101 0.4461588979108190  
0.9864561836551519 0.3923177439931584 0.9530727509744299

0.4040003238467187 0.8901216435530953 0.2570994684794911  
0.4926331223811283 0.8943442877034382 0.7558023190438217  
0.3120498856324005 0.5364287839095796 0.6758694240250830  
0.5943349934467278 0.2728128631407999 0.2010046129359128  
0.8211214879271742 0.7766137026657745 0.9986938108423925  
0.0883404964116242 0.0250520530224423 0.4944356504482263  
0.0907828390075412 0.2739481804534799 0.5045786284196270  
0.8032222175783109 0.5268302103600568 0.0037588562676528  
0.5841627584633755 0.0227853088427388 0.2131670516822270  
0.3088428466891325 0.7860076421045499 0.7208621080451623  
0.2805920063671268 0.4411748945211773 0.5416060415813428  
0.6311741412742470 0.3585656876017293 0.0586436004164611  
0.7750475496422488 0.8585029661630945 0.1422205100627453  
0.1212751480027099 0.9503669232315147 0.6526263818480688  
0.1169221711128624 0.3578006835431065 0.6540594545689035  
0.7655820338867766 0.4390376185780880 0.1437782934316641  
0.6164915756202157 0.9569092576315485 0.0476166368856163  
0.2743681678309557 0.8601207828523545 0.5649323879901452  
0.3290311959071945 0.4723278019083561 0.3592548145812403  
0.5635656537468408 0.3280989781600388 0.8956912419877975  
0.8364621351281870 0.8262588348909291 0.3104433682167983  
0.0727123960482778 0.9818282184529876 0.8324971090370913  
0.0645103801194621 0.3196828648600573 0.8303639787857815  
0.8317126182356157 0.4717276939176169 0.3050654427999378  
0.5674432886935180 0.9781129127579110 0.8633219917404252  
0.3362939830129174 0.8258864477478505 0.3970546593145755  
0.2617049985155533 0.3580181270681769 0.3859789735992001  
0.6361259274805483 0.4412833229084682 0.9000624472257376  
0.7666761218284059 0.9398374211601591 0.3031222776848599  
0.1200758140420591 0.8589279490097805 0.8022358574679519  
0.1138568134260785 0.4420810922078510 0.8114816692409784  
0.7606423182053254 0.3582778404978681 0.3066128327260791  
0.6236485386967264 0.8606931086631326 0.9065143244952046  
0.2683117463461603 0.9421178383096561 0.4063668296654961  
0.4169596771753239 0.5388314898329531 0.2583578786192648  
0.5030595050326309 0.2517046015450376 0.7642906744786797  
0.9028317128883183 0.7592024517296494 0.4444201015719763  
0.9850898122036158 0.0448077172815510 0.9438312985011288  
0.9831578148824156 0.2569600627672056 0.9496575428388881  
0.8885905857505506 0.5439216057050306 0.4422231409716134  
0.4690409530101932 0.0282210042993048 0.7573452366638315  
0.4025864937851829 0.7543318133200683 0.2638679553437533  
0.7030314004202403 0.2376691496870705 0.3076896568573605  
0.1880678391351931 0.5529972584211796 0.7835934727612598  
0.1967253401547035 0.0541245404194088 0.3847386125733067  
0.7044143806878961 0.7558517784556653 0.9104651307362992  
0.6940755567727972 0.5622145963429515 0.8983272991559591  
0.2043555571117737 0.2389190672475793 0.4093261106853311  
0.1960767286483340 0.7485724231528151 0.8080857897739158  
0.6966717447589984 0.0526412570938064 0.3133095713372278  
0.5872678963583192 0.2419383449117385 0.3972052831893407  
0.3077647868465969 0.5452280925187246 0.8974401159844373  
0.0813389629563293 0.0615520294939751 0.2993113749137213  
0.8128512782884013 0.7413980567511197 0.8046629889565711  
0.8086001966252145 0.5587224143361607 0.8074501406389916  
0.0929137922426354 0.2512706687317078 0.3064297709733901  
0.308956600917044 0.7319825980010506 0.9051186971058325  
0.5834518376392033 0.0601394834183988 0.4074026783898256  
0.6106639233701410 0.1477599352669411 0.2590536373583590  
0.2818383823784758 0.6553533227046923 0.7451174422380531  
0.1099988428790922 0.1504338731635433 0.4414362651076883  
0.7858030397098776 0.6524664689743314 0.9492488397237586  
0.5238252547356477 0.2584925440144854 0.5677127766316564  
0.3758132312629230 0.5267188872626077 0.0687743156947890  
0.0137457524377051 0.0259471962605460 0.1362672824158160  
0.8783972082652347 0.7743443444901280 0.6388219045281524  
0.8735722599661069 0.5311026071291409 0.6382620648804287  
0.0203876143512722 0.2705455023411310 0.1408564749481320  
0.3736704352131049 0.7679402304389671 0.0715863545142995  
0.5112026009346633 0.0238089110641112 0.5685101050383569  
0.4543965739500932 0.2367170040064270 0.4003739801810924  
0.4377211780514271 0.5676511808729980 0.9038413729726159  
0.9500257125035995 0.0582412722904029 0.3039290790999316  
0.9448626307356021 0.7436076644835609 0.8050097621618860  
0.9400614524317465 0.5640507959719161 0.8027159713173996  
0.9621992018216158 0.2354028108416020 0.3121966555856308  
0.4400957048704303 0.7537692229091236 0.8998955898020154  
0.4521102417459190 0.0630816239103515 0.4022631861053485  
0.4984814210736419 0.1413109237287251 0.6585072213369521  
0.3958125931925521 0.6469056406212198 0.1486532786534434  
0.9987072723316160 0.1497009418507740 0.0646931422817110  
0.8840855826473681 0.6528527439389252 0.5583917966482393  
0.4033300013601900 0.2339410751904842 0.6340892509743897  
0.4989955876444119 0.5657795171244845 0.1090164559706865  
0.8943929456989478 0.0687578223304139 0.0853764823167337  
0.9946440122751053 0.7267111130568220 0.5792413338597888  
0.9890162706983684 0.5738692623567146 0.5612674891169677  
0.8969771472079290 0.2335317808047284 0.0960307733785448  
0.4961941650201440 0.7321668434858312 0.1243424227463846  
0.3902937806517262 0.0711836455121793 0.6126667345931612  
0.2923994620695120 0.1612558082654656 0.6288076191509989  
0.6009307470124597 0.6489386852875705 0.1329439696283681

0.7918013995942205 0.1532243596342910 0.0749062695834296  
0.1004234175619713 0.64658839184336711 0.5747720049202695  
0.2982574646717113 0.2803169993717263 0.5371571618312104  
0.6177467668382548 0.5264976839711141 0.0521093359576268  
0.7791945294025849 0.0322248788558256 0.1604982340281927  
0.1079080707849949 0.7667143993757091 0.6615998969294897  
0.0898624762399621 0.5236141651679380 0.6599417004027943  
0.7792602007418481 0.2756047426209255 0.1537892203663738  
0.6125580081162454 0.7708330764385369 0.0515433134814314  
0.2723751366999331 0.0398879055269778 0.5449711267662765  
0.3278042479921310 0.2454647131587431 0.3473278323945196  
0.5664340337099150 0.5529747183540752 0.8698942205335564  
0.8231635059191637 0.0566867026258789 0.3491051864638059  
0.0709870462936178 0.7391077931679327 0.8524792650815343  
0.0664037650195590 0.5628542954636420 0.8513232415722064  
0.8315824339703581 0.2457110263036659 0.3336497951296226  
0.5812175163809378 0.7379193079421574 0.8590148328642390  
0.3246526503514418 0.0589889780100936 0.3600362380218677  
0.4019906810607134 0.1488014496631559 0.2702012914249248  
0.4967652022108956 0.6452465263052789 0.7703497833069812  
0.8991940302440491 0.1503088332259956 0.4302104489306638  
0.9871162278966534 0.6520009842638517 0.9367616727420569  
0.5080760882463394 0.6193011931208514 0.5069449514544702  
0.3987918392387406 0.6769124355640790 0.6199793686840591  
0.2363736466544235 0.6621970607723082 0.5349979842628581  
0.6002239121520541 0.6790521045602717 0.6392239929110884  
0.2977065815610603 0.6107300667945339 0.3839708249026829  
0.3463306958466004 0.6013462817625613 0.4635859418002970  
0.6213170800134624 0.4718121337111720 0.3017355087448763  
0.2709330812354027 0.3411927378188053 0.7965399087413809  
0.1273857159755842 0.8268152576428209 0.4103253647293852  
0.7742402215318134 0.9743124506637366 0.9031523160040603  
0.7728989232891702 0.3275169745277936 0.9009156452692130  
0.1245711326180743 0.4715202317731952 0.4034887572565544  
0.2789610847526086 0.9794746413783413 0.7974904414710549  
0.6275139778746635 0.8276202924017725 0.2928255918309767  
0.5220231815927662 0.4320778447494186 0.4592968442912099  
0.3774850972501885 0.3653964613248461 0.9506228623679502  
0.0276272379489168 0.8656825986699803 0.2544911155184517  
0.8771062076509689 0.9360639668867181 0.7510658384652608  
0.8738703355445775 0.3671690168782049 0.7498106954088759  
0.0201315927906339 0.4365675252045896 0.2537030971819252  
0.3708601774200499 0.9327225210511210 0.9577115726179843  
0.5266259292296693 0.8678292097971740 0.4461653411105667  
0.4727583774236823 0.4447256359503689 0.6747416067920328  
0.4304289956455200 0.3476993273047594 0.1645120809014517  
0.9763091247139685 0.8546033076009570 0.0376973772775824  
0.9244615756607029 0.94918030796888572 0.5330454231550826  
0.9223805152749114 0.3530091561611635 0.5301571006263496  
0.9669385900356033 0.4492967209669342 0.0357228482202855  
0.4226845998349861 0.9465970550649612 0.1734042635117700  
0.4778135672957480 0.8451998570533978 0.6605648223879179  
0.3198101554986061 0.4559748892606877 0.6459500018693944  
0.5830229719427722 0.3480909272713621 0.1552134349003187  
0.8241610271411354 0.8526080716682385 0.0458014402886407  
0.0791033163789027 0.9519956050662910 0.5485809375268726  
0.0783980728121958 0.3498560205236453 0.5478526684024025  
0.8129777231740066 0.4503727684594636 0.0463414854606787  
0.5769979761619852 0.9512971498842286 0.1538855175479119  
0.3249041849963786 0.8548542448010654 0.6601084384275604  
0.2693112109894321 0.4360121301368299 0.4209375914453755  
0.6306970136100815 0.3627745709765127 0.9360979440104298  
0.7714171267990342 0.8620817209589831 0.2645370613773127  
0.1287632105158551 0.9383261739657572 0.7734786601914951  
0.1216606949422793 0.3641088812011667 0.7762367907996398  
0.7646418610846449 0.4359817123892929 0.2663700353781520  
0.6254879962980298 0.9411578612580375 0.9277874611239006  
0.2718902697953078 0.8634930454653710 0.4423520230995573  
0.4056298643333512 0.4697314268229272 0.3206234596741601  
0.4975322839357298 0.3211781063314931 0.8282245695389514  
0.9033514327713381 0.8271432357382619 0.3766127731110594  
-0.0008929556975885 0.9762126766825204 0.8804844925718270  
0.9925656840061747 0.3250194142947050 0.8834372804908478  
0.8961662865308260 0.4753453612043068 0.3763221832518455  
0.4932027504890970 0.9633525369775157 0.8223345876547685  
0.4024327082049045 0.8236214386721527 0.3285522254511170  
0.6241021574459761 0.2257263076356288 0.2908798714817979  
0.1197723146577578 0.0725052301789370 0.4061055072873120  
0.7801948873813952 0.7313849983705182 0.9166441523151815  
0.7727912696744972 0.5747223672637045 0.9151604472479414  
0.1246556067901095 0.2290983751149213 0.4151643951529927  
0.2740923577656680 0.7306496354325854 0.7942997535815508  
0.6191300058300734 0.0704001795751717 0.2976361761340139  
0.5203694852876749 0.2725481973254165 0.4471922461563697  
0.3763615486382843 0.5211889372986885 0.9454004003301978  
0.0160548023024237 0.0223534664058880 0.2587810352812082  
0.8783650884461459 0.7793142020200318 0.7612486105451898  
0.8750256899357112 0.5247676781246098 0.7604764587778797  
0.0223608973594465 0.2788137038133494 0.2629953416266296  
0.3711396703758211 0.7763802739721023 0.9490606886631583  
0.5160719903584430 0.0231947073038596 0.4459931531327641  
0.4814506450984355 0.2211850798166016 0.6559240876624537



0.4221579586387141 0.5699490406872206 0.1454518876146077  
0.9724408013017436 0.0725787558299257 0.0568970483389790  
0.915655561893037 0.7281475365239597 0.5550103139436989  
0.9090936921373131 0.5752552891929761 0.5503595586169581  
0.9744150382067668 0.2276650949739420 0.0625842521553863  
0.4178100234576390 0.7255135656982232 0.1517747561333680  
0.4669400937232113 0.0663250621005604 0.6495985000388274  
0.3232657532634949 0.2372036345401758 0.6345191576968752  
0.5772938895789691 0.5704940758084723 0.1357324325747448  
0.8149034957640071 0.0745594069653618 0.0706743561857401  
0.0743226356991460 0.7256080985153348 0.5693820225216411  
0.0685575246929643 0.5698845977934417 0.5652459484014994  
0.8182925664619987 0.2307431285939718 0.0699156026419759  
0.5758502984286554 0.7270743259666289 0.1384879021770216  
0.3114450972729765 0.0812378683751243 0.6328476729185919  
0.2732669338147495 0.2799233513884360 0.4204347909922441  
0.6282050948934309 0.5204940926150675 0.9302869409503114  
0.7670293699947525 0.0204396472035160 0.2807491513861213  
0.1238285524713926 0.7782802297390988 0.7812677557021042  
0.1162606236225280 0.5211322755247574 0.7774095612843588  
0.7690178603755637 0.2792272350246623 0.2758941495527218  
0.6290481577661149 0.7804836610265582 0.9316741480975772  
0.2663201000909043 0.0233215191652486 0.4247635615020102  
0.4018124950902486 0.2266290361966314 0.3081380832310200  
0.4954435199840255 0.5696501251913891 0.8190178346292902  
0.8964830007702383 0.0721412216897654 0.3933218670443754  
0.9965797911415830 0.7290457621300795 0.8968313292281127  
0.9925398396695198 0.5748794206026636 0.8950066361743332  
0.9005752012226570 0.2278540545671364 0.3905226248855491  
0.3976946998270992 0.0721593921819921 0.312988946775795

Structure TS 3→8 S=10/2

1.0000000000000000  
20.1473052208878016 0.0000000000000000 0.0000000000000000  
0.0000000000000000 19.7681594983396991 0.0000000000000000  
0.0000000000000000 0.0000000000000000 13.2309279702280005

Al Fe H O Si

2 2 10 200 94

Selective dynamics

Direct

0.2713874465928683 0.5734906592876285 0.7795064677470975 F F F  
0.4989967249577205 0.7310015888303738 0.8195883473577155 F F F  
0.3426152072290083 0.6208499174492604 0.5705936255158895 T T T  
0.4740029550511596 0.6730919308357456 0.6182357161107996 T T T  
0.4481184341892835 0.5545538811268316 0.5113087224308482 T T T  
0.5172273631084274 0.5882880839085427 0.3316736012906171 T T T  
0.4875280586670453 0.7496397431093568 0.4572341152018059 T T T  
0.5062673678048080 0.6741972991053073 0.4276737315253920 T T T  
0.2201745440821567 0.6506701615727908 0.5818461197955632 T T T  
0.2539725141151744 0.6353335488069186 0.4384994561598499 T T T  
0.6063262235338764 0.6462219287847334 0.6823517947327263 T T T  
0.6054913171329409 0.6765997566339490 0.5728410187705668 T T T  
0.4438864525987288 0.6134413344405396 0.3493223794055161 T T T  
0.2562000617893999 0.5704243753208673 0.3559457376994891 T T T  
0.7009020698338233 0.4777312668909488 0.3036354498540206 F F F  
0.1937942961441195 0.3341419038414060 0.8120088371364531 F F F  
0.2070224373259961 0.8219506853618057 0.4041630229907085 F F F  
0.6946122724716162 0.9705053284069152 0.8872438097918263 F F F  
0.6939404212670368 0.3267677175943291 0.8830675911785022 F F F  
0.2074744225092431 0.4823212212360630 0.3886608123782054 F F F  
0.2002379965282728 0.9621164981080952 0.8116991203417854 F F F  
0.7059156811928560 0.8206493353761815 0.3043951618196843 F F F  
0.5909353623140277 0.4627103945244571 0.4125798170766259 F F F  
0.3064068146155634 0.3454627586020678 0.9074177364747555 F F F  
0.0963894250656097 0.8334305411537670 0.2983123491376034 F F F  
0.8112199640428344 0.9729023057418047 0.7943835124992162 F F F  
0.8080498956955111 0.3324684413202590 0.7871824108142818 F F F  
0.0932567355172509 0.4656545024075456 0.2925287535040866 F F F  
0.3128360005168105 0.9833373494196209 0.9094706141618047 F F F  
0.5968394352757755 0.8446511727738084 0.4075152596925804 F F F  
0.5868297097338271 0.5360932967171763 0.2485160607686581 F F F  
0.3010759741320754 0.2782352422192247 0.7341859157833284 F F F  
0.0980299139432219 0.7566206361177095 0.4631544829048480 F F F  
0.7927671048231275 0.0431179810875832 0.9620463755852242 F F F  
0.8002672233656369 0.2628321982297095 0.9583723220083158 F F F  
0.0995423317909214 0.5407057027385773 0.4589156640993153 F F F  
0.2858477358032800 0.0544315166981377 0.7455234945035301 F F F  
0.5936017900218786 0.7582000427236792 0.2555885952170200 F F F  
0.6012104508626095 0.4013484719088041 0.2369193503950484 F F F  
0.2877115203303262 0.4136776999572263 0.7358215712387945 F F F  
0.1063753862497663 0.8910035097498437 0.4788606469162531 F F F  
0.7988098361020022 0.9081367816048456 0.9671559607237441 F F F  
0.7929839900216678 0.3979756298011026 0.9585976274122103 F F F  
0.1131908843828242 0.4063504129392967 0.4707715476368008 F F F  
0.3162906651859814 0.9254190325638660 0.7280740924445439 F F F  
0.6083219139751748 0.8908530330575744 0.2200733069482723 F F F  
0.5241727572279302 0.4480373385697902 0.5793000151591841 F F F  
0.3808570387826080 0.3584329793929584 0.0708316365453356 F F F  
0.0276451420076427 0.8603651120273952 0.1324208885018052 F F F  
0.8750112439299045 0.9371197238354512 0.6292478068785812 F F F  
0.8780940739388186 0.3640068115939314 0.6271490185928741 F F F  
0.0191191490645934 0.4419183331637342 0.1322856134576327 F F F

0.3703547829408649 0.9453229852168619 0.0814364732209825 F F F  
0.5255977570238528 0.8666671474312651 0.5689760921505709 F F F  
0.5116655918273452 0.3543130121383271 0.4330199214899864 F F F  
0.3970177164352293 0.4437214267515941 0.9152349237728785 F F F  
0.0191422986485748 0.9425412641264970 0.2932921137061726 F F F  
0.8785592518888379 0.8575894248308060 0.7933334744369063 F F F  
0.8817766800181346 0.4447547640653227 0.7895222699340523 F F F  
0.0143408887096186 0.3578991281657906 0.2913018581460420 F F F  
0.3506911829421213 0.8575219720562686 0.9310461601728051 F F F  
0.5121153666608365 0.9483938290406684 0.4060591632085249 F F F  
0.4590825970792594 0.4752270028370873 0.4105297772637044 F F F  
0.4343604995427484 0.3168527706029707 0.8973434342258244 F F F  
0.9652875519511284 0.8220174644166605 0.3001912498694495 F F F  
0.9444556748634412 0.9720062700116827 0.7909292803449759 F F F  
0.9394606956414790 0.3253314698337491 0.7944382699864363 F F F  
0.9629484987495402 0.4806088401718043 0.3057600082441780 F F F  
0.4427755461209202 0.9541253725475158 0.9193731039702016 F F F  
0.4664828906071392 0.8241442577872888 0.4021299979443143 F F F  
0.4839778577807294 0.5144732394632356 0.7390709604054138 F F F  
0.4241961555157161 0.2716371886116562 0.2084050833430808 F F F  
0.9824618153556344 0.7783653251613103 0.9914433437734189 F F F  
0.9124683258102380 0.0252239423823113 0.4913982199794589 F F F  
0.9131443988948860 0.2766224502957968 0.4872768751003989 F F F  
0.9785143627045869 0.5220371124328409 0.9853368966859435 F F F  
0.4154736638995118 0.0232842718124360 0.2248892591248790 F F F  
0.4966740888761194 0.7677390470336007 0.6960748110799457 F F F  
0.3989427587732095 0.4365143495261208 0.6338415592001923 F F F  
0.5093034833239827 0.3521660003834910 0.1133890635098638 F F F  
0.9009343895091249 0.8671847004973259 0.0788509313793426 F F F  
0.0003895776170921 0.9391799816478112 0.5716044885571989 F F F  
0.0019085406606152 0.3647164595992223 0.5583207734370603 F F F  
0.8935964926597961 0.4374958663212922 0.0746845557945193 F F F  
0.4987216866285848 0.9381893735578828 0.1341305870643765 F F F  
0.4012650648429386 0.8529654934730218 0.6262517238020493 F F F  
0.4942112891850101 0.3815826188160898 0.7446980736938826 F F F  
0.4273848517446481 0.4021396539805906 0.2486987667027449 F F F  
0.9949263860956705 0.9095061490771030 0.9525075757933479 F F F  
0.9066952825050834 0.8950224995439484 0.4455833891179068 F F F  
0.9011079362424184 0.4072871105683546 0.4442131222063708 F F F  
0.9888392456478883 0.3895336020950708 0.9546182751985270 F F F  
0.4046756700474603 0.8911653368946588 0.2551792182181458 F F F  
0.4934112700199549 0.8932547086887936 0.7588033177957954 F F F  
0.3139261917212792 0.5386838986337921 0.6694681570760466 F F F  
0.6009097850880636 0.2710913252680029 0.1934954359762528 F F F  
0.8200848826935783 0.7765460222902760 0.9984586559957833 F F F  
0.0880979512659081 0.0238970080405565 0.4922469747806915 F F F  
0.0938457187074064 0.2752495330006894 0.5001866383612565 F F F  
0.8067468733169250 0.5273636024084070 0.0049857625058465 F F F  
0.5849117836162989 0.0229142633160038 0.2168695934853631 F F F  
0.3051711120661480 0.7911553452317577 0.7321165073485787 F F F  
0.2822556891123540 0.4395726522707548 0.5418505512945515 F F F  
0.6344794428142322 0.3609949941063775 0.0540813528372652 F F F  
0.7756172430680124 0.8573339296088562 0.1440740384020529 F F F  
0.1208086597138447 0.9522627291976846 0.6531408204291509 F F F  
0.1177086855625973 0.3556923211200242 0.6538192154393556 F F F  
0.7680143516072633 0.4377240352908416 0.1417558727610881 F F F  
0.6179581892356723 0.9584209964041577 0.0500618446599930 F F F  
0.2749488906195481 0.8591732794921896 0.5674110495647469 F F F  
0.3321544765168127 0.4555700957957427 0.3581408650067459 F F F  
0.5646837028758185 0.3279795157719079 0.8933615304605667 F F F  
0.8349848960296100 0.8253016817860015 0.3146090409080884 F F F  
0.0724659127307063 0.9836772134372964 0.8337981386176168 F F F  
0.0671105737146007 0.3172755393693976 0.8313631044545744 F F F  
0.8317517540072146 0.4718277753900182 0.3048253796135683 F F F  
0.5670388989774864 0.9765945733669881 0.8671527345897942 F F F  
0.3358448545986974 0.8284969923944629 0.3968430240608569 F F F  
0.2491758704634748 0.3555541880498225 0.3921748027717413 F F F  
0.6299478891085144 0.4450755396513273 0.8971146381714092 F F F  
0.7665336423208302 0.9398775324140871 0.3030802299810205 F F F  
0.1152484011964958 0.8600307979189310 0.8015264686432459 F F F  
0.1124795890101637 0.4410003570970105 0.8104325548353941 F F F  
0.7601736993352191 0.3584349014500248 0.3060789268216126 F F F  
0.6230477033400419 0.8590071135784854 0.9133661098972254 F F F  
0.2658304330503114 0.9425683023831937 0.4104485731182663 F F F  
0.4084090036355406 0.5356263505828736 0.2536185855753885 F F F  
0.5045863454206696 0.2494296734288426 0.7636582708929680 F F F  
0.9046775162540044 0.7592176351246493 0.4462181833350627 F F F  
0.9830652437721525 0.0446484220013872 0.9445734955835974 F F F  
0.9838951823707944 0.2545610686206246 0.9481181143821544 F F F  
0.8885964659149792 0.5431856375390893 0.4418744314733587 F F F  
0.4695459839904927 0.0270707925288605 0.7596820434661851 F F F  
0.4028743153128715 0.7549983368661657 0.2664759816249429 F F F  
0.7044790126251854 0.2370112033370049 0.3110025292375127 F F F  
0.1901491678593246 0.5490095305833194 0.7773753140809703 F F F  
0.1970910298887674 0.0562732054537634 0.3856239664226209 F F F  
0.7018189883260035 0.7522314051873096 0.9151752857744526 F F F  
0.6965232723820662 0.5610811773859297 0.9018400188216020 F F F  
0.2056408232038862 0.2313271939454609 0.4073843771776495 F F F  
0.1935312539373157 0.7518589931624859 0.8167099837896714 F F F  
0.6973428850458419 0.0529821566343500 0.3168310660817610 F F F  
0.5862443224009368 0.2482721254735267 0.3912217058907927 F F F  
0.3097769386784748 0.5449124290669971 0.8878140832200359 F F F

0.0829406322461850 0.0595150016702846 0.2966262842706442 F F F  
0.8081386613249038 0.7437888944935978 0.8036166522323427 F F F  
0.8100803307999129 0.5572733058574428 0.8077824706233940 F F F  
0.0944152828151061 0.2503372628341367 0.3030649355709372 F F F  
0.3061822800647391 0.7332773131171990 0.9121384873187353 F F F  
0.5842077405777601 0.0607087988592880 0.4110500956170640 F F F  
0.6108657432777065 0.1480596756675183 0.2627939699314723 F F F  
0.2784960139954933 0.6588076696295744 0.7499738018526614 F F F  
0.1062947662898424 0.1497107612848154 0.4394759312629049 F F F  
0.7880364342000377 0.6523468423466454 0.9480754430516214 F F F  
0.5253834958540153 0.2546053506798884 0.5655059106710070 F F F  
0.3713112145347068 0.5282358617691258 0.0649088769742647 F F F  
0.0124498010217948 0.0246450655894392 0.1362065212848123 F F F  
0.8777604697407000 0.7730807381010791 0.6398747351063108 F F F  
0.8748883843770798 0.5309000783101823 0.6381712576111127 F F F  
0.0193519126290980 0.2707398982541065 0.1396775405586368 F F F  
0.3744376378380778 0.7695483464215798 0.0741319796066122 F F F  
0.5097615278010039 0.0232408952174055 0.5698044614312749 F F F  
0.4535405109358734 0.2372957124296278 0.3985827183935911 F F F  
0.4396671566536483 0.5690821423561090 0.9096142667244749 F F F  
0.9518028524500650 0.0582707619390490 0.3059786724617481 F F F  
0.9395438527366977 0.7392486075828444 0.8093039967144335 F F F  
0.9417632706077654 0.5641646845792536 0.8025819445478817 F F F  
0.9636023711353090 0.2350373546584876 0.3122068117451420 F F F  
0.4365016968116890 0.7574011616107512 0.8969215024482864 F F F  
0.4531558953205419 0.0689688712527499 0.4041500392630013 F F F  
0.4969939444268263 0.1397798317542609 0.6594527202481331 F F F  
0.3945965565528340 0.6475182611820713 0.1500662506942732 F F F  
0.9968503603961310 0.1489599227331837 0.0673691587288232 F F F  
0.8861850070465849 0.6523401415963335 0.5582546031113793 F F F  
0.4043895777993640 0.2350433647479946 0.6322884527529737 F F F  
0.4956907715398771 0.5638420552734971 0.1109834638117491 F F F  
0.8927950171922348 0.0678611641195346 0.0871530245750662 F F F  
0.9957828530532140 0.7280825479617050 0.5834725046939653 F F F  
0.9902388070250794 0.5719100306091747 0.5579974489372788 F F F  
0.8957704259749733 0.2346838257898582 0.0927427233777820 F F F  
0.4958130633186784 0.7327231859821381 0.1261564036449414 F F F  
0.3886759563484077 0.0689587292815119 0.6166105334159795 F F F  
0.2934055253999404 0.1620217334075349 0.6310862689320231 F F F  
0.5981442648397604 0.6480030397068930 0.1408055264889754 F F F  
0.7910764463249791 0.1533042332442207 0.0734209082204416 F F F  
0.1000744172171295 0.6461045383779549 0.5787620227516967 F F F  
0.2983979170308118 0.2786042333791841 0.5349486382653978 F F F  
0.6159906406388558 0.5279317922284221 0.0532561298032590 F F F  
0.7767238101111573 0.0328671606747264 0.1603277496061608 F F F  
0.1110921606119746 0.7671297517090210 0.6609312867103796 F F F  
0.0896980042805637 0.5211593947307307 0.6574665880622774 F F F  
0.7785136770309009 0.2750189917972250 0.1543886364118094 F F F  
0.6147027343204954 0.7701896709343501 0.0609342790660818 F F F  
0.2704045431633233 0.0409997709423351 0.5478386935489894 F F F  
0.3277396112879387 0.2529933078111242 0.3427066711930209 F F F  
0.5694480302475498 0.5638988185162503 0.8714694257154818 F F F  
0.8243845545218420 0.0565248332726824 0.3469354803837348 F F F  
0.0672085349807858 0.7393723091401299 0.8476408549899048 F F F  
0.0688099035873861 0.5632298801816020 0.8484387774507240 F F F  
0.8332437269609372 0.2470251765567255 0.3333428028864489 F F F  
0.5764509642253657 0.7357433522844659 0.8731742258501072 F F F  
0.3254598232850796 0.0576595395239892 0.3648558918404063 F F F  
0.3973677200442793 0.1502366886714057 0.2714685747007621 F F F  
0.4906841464746563 0.6466291298424238 0.7697417747813660 F F F  
0.8992437843456429 0.1502955651948810 0.4298227938373742 F F F  
0.9890497325715017 0.6504970651699509 0.9385697528405714 F F F  
0.4350002576325721 0.5864919911139128 0.5643744955012350 T T T  
0.3867049175060269 0.6978241229438720 0.6195415904527903 T T T  
0.4901197316471149 0.6288542893880539 0.3417516538925895 T T T  
0.5102052468439700 0.7092124779510675 0.4852570348946196 T T T  
0.2565531569097612 0.6525982571541019 0.5333517311457445 T T T  
0.5839219935963160 0.6437917217239308 0.6170717501566774 T T T  
0.2734895325638160 0.6169433744674547 0.3630228191016702 T T T  
0.3485149092344814 0.5961285937674841 0.4354770639571141 T T T  
0.6210683539397479 0.4689193167232659 0.2988155616205574 F F F  
0.2725667106729404 0.3431186420863597 0.7957547896179875 F F F  
0.1268634600853105 0.8256334830344940 0.4119001584139639 F F F  
0.7739870937439690 0.97343444953097889 0.9036193896895455 F F F  
0.7737838724838682 0.3293449842658589 0.8982527489469092 F F F  
0.1270032865819672 0.4732718794953215 0.4035783810580398 F F F  
0.2779752151051085 0.9803778898972979 0.7984313870939843 F F F  
0.6261895981933776 0.8287518951098249 0.2951182296531982 F F F  
0.5220279936746834 0.4333043478425509 0.4593963911958525 F F F  
0.3795153799372244 0.3665799956300830 0.9483728072876048 F F F  
0.0272971718401891 0.8646156335899207 0.2547385541154981 F F F  
0.8772947085770397 0.9350833042449338 0.7516587830690469 F F F  
0.8769945391433183 0.3669959992550034 0.7490656467429986 F F F  
0.0219063113573554 0.4362965744594476 0.2541308075287887 F F F  
0.3691236673940352 0.9346076368578764 0.9598573573608036 F F F  
0.5257458145638552 0.8723622128283495 0.4474547188807215 F F F  
0.4742925368543780 0.4456709721325751 0.6761672080159684 F F F  
0.4347014073309978 0.3460669621340955 0.1599787310081666 F F F  
0.9764701125548996 0.8539549544878540 0.0378219224457297 F F F  
0.9241310559104363 0.9490902504181946 0.5336791878607769 F F F  
0.9243895180970227 0.3529686500579956 0.5285627262441679 F F F  
0.9699266219420437 0.4478615144001594 0.0353295251616075 F F F

0.4229157277304054 0.9494084151483406 0.1736681913468985 F F F  
0.4779037649338846 0.8448955090057026 0.6631113605356731 F F F  
0.3211718534746950 0.4577032118710633 0.6455682044560831 F F F  
0.5863264590634785 0.3461035779605979 0.1492938879599777 F F F  
0.8241954406179559 0.8520421788511072 0.0469031248280132 F F F  
0.0787597620832869 0.9517109835569499 0.5489230364551645 F F F  
0.0809273630856637 0.3504115671850272 0.5459193445908355 F F F  
0.8160976218589866 0.4503167113913165 0.0453800282909356 F F F  
0.5770555109706592 0.9524822517885454 0.1549824723378492 F F F  
0.3243144034920249 0.8554206979584364 0.6644500938996174 F F F  
0.2685320961656004 0.4323752424462626 0.4223533450797490 F F F  
0.6306910540265349 0.3659273331550139 0.9314459084672677 F F F  
0.7710401480840829 0.8616947720253592 0.2661811862983825 F F F  
0.1274562297070148 0.9389720729418656 0.7739521054427385 F F F  
0.1226306341228707 0.3632410377271356 0.7758344414017984 F F F  
0.7655147029576170 0.4356347298256580 0.2641493812708120 F F F  
0.6256309271140736 0.9399154646565364 0.9306993195096922 F F F  
0.2709030920878064 0.8637567958807750 0.4453309657680791 F F F  
0.4061663175856509 0.4661480035077759 0.3170160615338560 F F F  
0.4991386626741416 0.3200284953237045 0.8248193913296618 F F F  
0.9032574447137947 0.8267639703659313 0.3777870723181636 F F F  
0.9987901344507790 0.9762728910108436 0.8813348044013978 F F F  
0.9948559538517614 0.3230587683779902 0.8832884025893790 F F F  
0.8967717361834744 0.4749473231857166 0.3754836417537533 F F F  
0.4930143145818562 0.9622070372398355 0.8252201781372435 F F F  
0.4011360355406453 0.8257916989791809 0.3275182305881330 F F F  
0.6257825715604213 0.2264858575151578 0.2895626846205559 F F F  
0.1192936380229241 0.0720085024647261 0.4047754123257405 F F F  
0.7786344573932453 0.7312752799614017 0.9170651591727150 F F F  
0.7754120522676615 0.5743251138242229 0.9159890022261123 F F F  
0.1251307097311951 0.2273508644257376 0.4122800993512641 F F F  
0.2713114313264313 0.7322125916787741 0.8006774648276149 F F F  
0.6198665026311971 0.0706849483734402 0.3010788236835040 F F F  
0.5190205140648345 0.2729847693407876 0.4466488689176202 F F F  
0.3762133459078072 0.5220425963016950 0.9417688964472433 F F F  
0.0164910128844937 0.0212049953224422 0.2585928811602614 F F F  
0.8760683649632526 0.7783259742184754 0.7621686706817599 F F F  
0.8770945448577407 0.5244271818075674 0.7603104653682564 F F F  
0.0234038748865757 0.2784442940745180 0.2617954769566069 F F F  
0.3687805080132520 0.7782209880058844 0.9515363277711657 F F F  
0.5152623787297088 0.0260408777961700 0.4476454632950748 F F F  
0.4819500459086399 0.2198089575733277 0.6551223450555099 F F F  
0.4177864900026194 0.5696471617267278 0.1429528961129023 F F F  
0.9708100386283860 0.0717960809219420 0.0580520510981160 F F F  
0.9171676221987042 0.7279802409499112 0.5568874941604278 F F F  
0.9104767044407751 0.5746017951098281 0.5495788141306477 F F F  
0.9735741614045210 0.2271508601413856 0.0618804074426293 F F F  
0.4175239930772889 0.7259624321200349 0.1536252843559112 F F F  
0.4655776677068886 0.0648426292578392 0.6520805462692394 F F F  
0.3242072590291514 0.2378940361257875 0.6339828549322775 F F F  
0.5738818262771233 0.5700142999551971 0.1369372226749945 F F F  
0.8134950484012506 0.0743854779298161 0.0705259393750879 F F F  
0.0757157491878573 0.7248202559754873 0.5712999999010790 F F F  
0.0699670722723909 0.5699415288017988 0.5646372260178296 F F F  
0.8168434824035629 0.2310353126051297 0.0686727953437156 F F F  
0.5748931369334613 0.7269369626580513 0.1450995947166334 F F F  
0.3100032148394618 0.0815716944968159 0.6358430816937997 F F F  
0.2707263873897290 0.2784850575472291 0.4197716647604111 F F F  
0.6276945265863105 0.5240367184468866 0.9311053976436483 F F F  
0.7670186614803001 0.0205050335420509 0.2809904080085701 F F F  
0.1222650459423420 0.7793605144664042 0.7817377882055254 F F F  
0.1174083694603354 0.5197284688391051 0.7742537777077843 F F F  
0.7697287706861360 0.2791466142607604 0.2766064150976106 F F F  
0.6274026906249404 0.7786835569135278 0.9394088168264787 F F F  
0.2653384779665302 0.0237964628408776 0.4278937697257774 F F F  
0.4006984462028456 0.2285572058496257 0.3062468808612095 F F F  
0.4958202409578973 0.5723317964105235 0.8228886285073926 F F F  
0.8970592420500836 0.0719588028897036 0.3935478720961143 F F F  
0.9947888425068498 0.7276592831352602 0.8971350686790629 F F F  
0.9952273890463914 0.5741118298944272 0.8940019717831689 F F F  
0.9018736419509850 0.2278120022425512 0.3904139546189072 F F F  
0.3971651154127258 0.0739958479451914 0.3161128416285379 F F F

Structure 8 S=8/2  
1.000000000000000  
20.1473052208877697 0.0000000000000000 0.0000000000000000  
0.0000000000000000 19.7681594983396742 0.0000000000000000  
0.0000000000000000 0.0000000000000000 13.2309279702280254  
Al Fe H O Si  
2 2 10 200 94  
Direct  
0.2729435205142551 0.5739963383491026 0.7755769396734857  
0.4952674329855526 0.7297817431852158 0.8196753741374988  
0.3491036200604005 0.6197611853200171 0.5521997541429524  
0.4767737523659572 0.6710550535264536 0.6151331439888887  
0.4540307116660706 0.5576216050217294 0.5163740130203133  
0.5322112944676934 0.5862424204834408 0.3260778085973982  
0.4919258162952807 0.7442789245356264 0.4534157302701177  
0.5126284050822071 0.6687086483940633 0.4251047514780397  
0.2559762606815125 0.6606304276990186 0.6177430509661338  
0.2340098729727370 0.6539682063346002 0.3976103171225023  
0.6071623419332800 0.6469784320183587 0.6924485727481396

0.6125764432987630 0.6744932231771252 0.5811799864050230  
0.4559333085063838 0.6031529232330645 0.3394996731921677  
0.2278961845866442 0.5933668843823646 0.3261124112869189  
0.7003309352545951 0.4761976179137424 0.3039936161636058  
0.1952291380279384 0.3322550820714626 0.8092955963715334  
0.2077878379984082 0.8224912505838246 0.4038098203651929  
0.6943939151673161 0.9701865766675346 0.8876507992685048  
0.6934943859241870 0.3281492388099953 0.8800136980527518  
0.2063899442567544 0.4813311856656806 0.3881256066528118  
0.2000616909322249 0.9640075602413045 0.8138227248308488  
0.7066588446536897 0.8200365638051970 0.3039194079065198  
0.5906393065840729 0.4588211281398010 0.4120517288955924  
0.3063393469758207 0.3460965857758681 0.9081994210968637  
0.0972052577530835 0.8348819087754185 0.2977234714875870  
0.8106636827862859 0.9740828552420365 0.7935036021853484  
0.8086611291110519 0.3321760562857359 0.7878357127119462  
0.0922405084323907 0.4674390961378347 0.2922381598709317  
0.3134216937817420 0.9826610312586972 0.9120234716612470  
0.5972119207661446 0.8431606391131287 0.4063976390571766  
0.5865002166692682 0.5330520614465091 0.2480272427234422  
0.3055213732250251 0.2801551981698341 0.7342126795308319  
0.0987474849643865 0.7567646060479982 0.4619742009030804  
0.7917327163754329 0.0440182958463158 0.9622582586333618  
0.7981830592331735 0.2636128623706342 0.9595187826988636  
0.0985288815353864 0.5406874215678761 0.4603828618958210  
0.2876743517724983 0.0549520197024923 0.7492925605520521  
0.5950880751033397 0.7567069213229154 0.2538384940566734  
0.601665033289616 0.3983646997791981 0.2359427963032717  
0.2881780285546480 0.4150402593904894 0.7372321611005086  
0.1072338839213857 0.8910652345958674 0.4787678117829697  
0.8000697060595604 0.9092605124461620 0.9653817980014547  
0.7919613294432450 0.3989119846401444 0.9580216192006901  
0.1111963954656999 0.4063172842474627 0.4686840497724745  
0.3152212058749481 0.9251966055913768 0.7304180249685087  
0.6086334848900250 0.8892160620539696 0.2183143319385127  
0.5237639083624690 0.4513779475581061 0.5796346763525583  
0.3810003126707059 0.3560110155106439 0.0712093342114668  
0.0259471992619286 0.8590037786111820 0.1335364896850751  
0.8752636234655128 0.9386262291727857 0.6292217329810859  
0.8783740714271741 0.3639238605100422 0.6280484608681339  
0.0182664736070479 0.4424994902820379 0.1325014429872488  
0.3708068913119932 0.9431650821538188 0.0833652585736480  
0.5262270347616598 0.8626093327097242 0.5694802368401725  
0.5067528708884139 0.3538167942167224 0.4405271327585157  
0.3975708597012080 0.4436574115381680 0.9186341472179175  
0.0173442739984948 0.9423964159371111 0.2923521630971239  
0.8774209947842523 0.8578846168014939 0.7918297565109856  
0.8822267891446027 0.4446374405042616 0.7903165768692445  
0.0144195419271479 0.3585943352628107 0.2916235213007785  
0.3505139466052517 0.8566608522784759 0.9317368782164857  
0.5107455504536630 0.9456252293166557 0.4078945650788074  
0.4596671218284779 0.4758961527049861 0.4090378067561601  
0.4341713475744949 0.3168588292319512 0.8961008547123607  
0.9667647162611834 0.8205559575192579 0.3049423038457380  
0.9438137908942903 0.9721163479966733 0.7923100286776528  
0.9399386730626335 0.3251437408816814 0.7954883421480107  
0.9617240830212629 0.4805666585369958 0.3059265301403711  
0.4434233576571727 0.9518728871611479 0.9209252082825037  
0.4675967254210760 0.8200514918799375 0.4025367059795646  
0.4821270669315796 0.5106642446892998 0.7454589443868586  
0.4252386708695846 0.2719569322454976 0.2119345393935491  
0.9809008992198860 0.7788488284527912 0.9898919874070031  
0.9152922300946551 0.0250538174763389 0.4906507217649115  
0.9132506268904320 0.2754159639743644 0.4896293758308434  
0.9770075592337193 0.5234512532234074 0.9864640125476720  
0.4127845343346495 0.0218708467990442 0.2274482101687703  
0.4881459379186965 0.7648727060832760 0.6942598589663090  
0.3982177848796197 0.4357272973458355 0.6306791871800111  
0.5094606507431433 0.3502503410606869 0.1126620771163660  
0.8994153372066698 0.8660041183853754 0.0798931867773065  
0.0011776313854667 0.9381261981719209 0.5731740957645768  
0.0022711865834074 0.3631613243393878 0.5606676887009551  
0.8928848476039323 0.4375049760008607 0.0745773785527582  
0.4986613528301214 0.9389492578346977 0.1375091483995363  
0.4000569203337362 0.8563867078305044 0.6225811506645319  
0.4924922305458838 0.3784751410636971 0.7387941305235387  
0.4280565955560683 0.4041337341620881 0.2457080130208996  
0.9936267885176154 0.9104457816308977 0.9549033842648275  
0.9068736491907038 0.8946410670868381 0.4472889899957413  
0.9021560448467250 0.4056960182337970 0.4446544980610041  
0.9887466430942619 0.3913039037985309 0.9540829679987770  
0.4056371325888263 0.8893264629140057 0.2576622440875538  
0.4922931703997395 0.8895659233369348 0.7596248465672861  
0.3150096362457513 0.5388000587343730 0.6660936554679078  
0.6028473121839173 0.2688805507307218 0.1886587119900563  
0.8157470523971964 0.7774156806935476 0.0002509114390792  
0.0882661875738053 0.0236525004779376 0.4940269951048704  
0.0955555092071879 0.2751378087412619 0.5030224223495005  
0.8044997995852829 0.5274287500067422 0.0093058640952421  
0.5873969700105605 0.0218613650205620 0.2184337416828308  
0.3105215607405845 0.7900974850998749 0.7324289283045549  
0.2799384041140092 0.4383248900624206 0.5427485350728125

0.6338174324165778 0.3614194553782110 0.0509283920288177  
0.7728311072089883 0.8613342838116890 0.1423514907529277  
0.1218211463521024 0.9516913889185167 0.6539026769546139  
0.1191261069608840 0.3587430978167204 0.6531647572170348  
0.7676377805064539 0.4349043225298925 0.1430322692791081  
0.6165142138706180 0.9585346686943377 0.0493091965458865  
0.2724373725393726 0.8582232231644055 0.5704682977398507  
0.3328168093301175 0.4531964735571715 0.3619393179217484  
0.5641596940823710 0.3293064376471878 0.8898176702177004  
0.8364721013580191 0.8308010769893180 0.3085212668824778  
0.0719411192460059 0.9828721298538533 0.8339409956866614  
0.0681223358123435 0.3211544503719116 0.8304711720547522  
0.8309638149073689 0.4692795138568207 0.3065626698856490  
0.5671430920110864 0.9735755264083764 0.8646291068547790  
0.3370787621656265 0.8298296453782789 0.4025709467356404  
0.2479756175928722 0.3546781829536572 0.3926874492277979  
0.6291721337314508 0.4463222910453363 0.8942068152990021  
0.7614533538894560 0.9415503816775759 0.3035508517157662  
0.1173113579641782 0.8601596952397099 0.8029590318081413  
0.1194748092216486 0.4431303979100112 0.8109425187785766  
0.7578866616035870 0.3565867472659466 0.3082328673588003  
0.6246654756642294 0.8576462475870752 0.9155296348323571  
0.2661665109137160 0.9432802694196929 0.4148315139224744  
0.4047729223815799 0.5370505017758258 0.2569398185348284  
0.5044364547921409 0.2475879162108186 0.7639412172435841  
0.8967295248815323 0.7593074223163422 0.444045556495487  
0.984328053085564 0.0456777061501534 0.9441115549366265  
0.9875993032101746 0.2560452492403414 0.9485919679443197  
0.8867096289235191 0.5412811232777907 0.4435460317997185  
0.4677736187169216 0.0234133761283178 0.7593181868480533  
0.3999630769390173 0.7535102672019386 0.2692403934320464  
0.7039231173663562 0.2341904922101294 0.3101825146056657  
0.1900446041282897 0.5556875859898449 0.7764584568827405  
0.1974316258667017 0.0569225748807104 0.3881748073408701  
0.6998486533757473 0.7482766087988504 0.9103850634462455  
0.6954279990013967 0.5627820035867918 0.9042891299540144  
0.2058672281057000 0.2298166556509031 0.4081025563538196  
0.1940207058691082 0.7515093203992147 0.8057902981829633  
0.6987519601510404 0.0584003756024615 0.3168958028456209  
0.5857562645034251 0.2539948637538411 0.3877141657400299  
0.3107383266784860 0.5445516060683090 0.8841632098092738  
0.0838541925743894 0.0579720691341371 0.297955455677403  
0.8094599656475202 0.7430944054685367 0.8055898554662536  
0.8092235118650086 0.5558187884042698 0.8113130069945994  
0.0939840936999009 0.2507413355119448 0.3055798017271652  
0.3026885823117155 0.7342152347514440 0.9140805941898708  
0.5857975222167010 0.0562213540941182 0.4134650406621997  
0.6061509001003579 0.1479817265627273 0.2684909947279497  
0.2828428186108393 0.6600921584839683 0.7483682053591285  
0.1053768162892774 0.1494848713880906 0.4403441534469011  
0.7884985773267089 0.6522320038778359 0.9502614230227182  
0.5279076245973280 0.2503023603994296 0.5651804169816420  
0.3677731186161433 0.5286370352575229 0.0656879312920787  
0.0139310298630637 0.0256835717405938 0.1357818779095230  
0.8755970850450830 0.7722233217172813 0.6391690642746011  
0.8724174831390804 0.5316184413976186 0.6399652269262532  
0.0201425358345801 0.2707742327165591 0.1411754538695797  
0.3719004652393328 0.7692713010557167 0.0766249276993598  
0.5090137168516055 0.0209496409023615 0.5706133106368974  
0.4536955399041520 0.2352311338837394 0.4006340261444797  
0.4396220091333148 0.5693811552516833 0.9134680401897864  
0.9525922464378206 0.0594689600178551 0.3046074586281702  
0.9415913947304485 0.7410126066921385 0.8057719069297404  
0.9410518220141820 0.5645306280667073 0.8029375547478917  
0.9628441892025974 0.2360636017828887 0.3127685821085389  
0.4338375678808047 0.7535544114811168 0.9002943776937489  
0.4552284803464339 0.0681030384322358 0.4034007810835940  
0.4973673543094339 0.1372470244180621 0.6623180109407453  
0.3951575282581867 0.6471931669027204 0.1498436616749748  
0.9960107045295669 0.1497893941406391 0.0673709698995237  
0.8849340948422467 0.6516065789351562 0.5563823751975805  
0.4059598666774277 0.2333208822080848 0.6293603274307408  
0.4927730995319312 0.5585903140389101 0.1137247086860983  
0.8933884638764036 0.0662585033960429 0.0860849397415446  
0.9928503599604153 0.7305004568300530 0.5745853800418887  
0.9886278484480110 0.5696094176913583 0.5597246225648086  
0.8965404964587962 0.2377022454128833 0.0897537707534418  
0.4938762626911133 0.7350791699295486 0.1296168637327732  
0.3884183775045144 0.0685658032357084 0.6165987420053397  
0.2940229723110557 0.1625853962160545 0.6352862906249898  
0.5931617700159241 0.6456350700369268 0.1416204009803403  
0.7932259937937364 0.1538105425669650 0.0739584126504013  
0.0957036372321816 0.6471178298708408 0.5800324878744760  
0.2986607668661940 0.2778429249934167 0.5352903623623847  
0.6130393808880521 0.5265962182461340 0.0518880117045386  
0.7773089361058139 0.0336372680809515 0.1608754740778659  
0.1051114330445072 0.7694457255449642 0.6599455155021563  
0.0896005103387515 0.5220118389094447 0.6588653010532844  
0.7792673438638098 0.2745917835235790 0.1562684143227143  
0.6127044938817440 0.7653265981242288 0.0571610893677631  
0.2688571356738430 0.0417883584473087 0.5523119950843057  
0.3277959104650779 0.2527891867682255 0.3434771044016077

0.5689588521535860 0.5659236162369307 0.8699239187641504  
0.8256289981404257 0.0546755020517775 0.3480479896971080  
0.0688370774844093 0.7399776631670324 0.8501015030066907  
0.0684301106140577 0.5624155666221479 0.8498373817027430  
0.8324796012442145 0.2464674247811621 0.3362763329235386  
0.5741585153488673 0.7373535698037087 0.8668286319547986  
0.3263634913424193 0.0584113819768102 0.37145479666352708  
0.3970639517864979 0.1495511792667844 0.2728694254733744  
0.4868214222250070 0.6451907416781337 0.7681862921717937  
0.8995857574761699 0.1498015045609983 0.4300801724294371  
0.9885185928544364 0.6513397500580097 0.9369360177874876  
0.4394405196326938 0.5823244396723325 0.5766725322417157  
0.3869973947607914 0.6961042462535283 0.5860087253395290  
0.5006817876352266 0.6229734103339510 0.3409398436556234  
0.5153963202587881 0.7045119135085104 0.4826472063355928  
0.2655127110628148 0.6480276690471619 0.5461285642196713  
0.5870463307062135 0.64477735656059356 0.6253759919461791  
0.2290914913471745 0.6426005314975843 0.3260463789821224  
0.3566556908520829 0.6023053348814980 0.4326317581039434  
0.6208425824445439 0.4656958138452596 0.2984982418522845  
0.2739054200964333 0.3436669845045246 0.7955266349551726  
0.1274954114704950 0.8256740386204162 0.4111098222790297  
0.7738331446125105 0.9743900853985070 0.9030724562675914  
0.7731672717281349 0.3300336666738019 0.8979090346278651  
0.1262261208058944 0.4740628662134949 0.4034294704051046  
0.2781031357747303 0.9808936389378168 0.8012340758221799  
0.6268588404978079 0.8275027166331569 0.2939104511843699  
0.5208224609062038 0.4330339256504922 0.4606124248555599  
0.3796829114565102 0.3661121576394485 0.9490985289535829  
0.0270002861659660 0.8641413536666785 0.2557608853220269  
0.8767832945681789 0.9357251629157401 0.7515563465685340  
0.8775649496456610 0.3668802713089507 0.7499251698649665  
0.0214077861953439 0.4371122248768097 0.2544163290450767  
0.3694678653993975 0.9333975717286683 0.9617606090475540  
0.5259785675290916 0.8695312647877376 0.4475666541749518  
0.4728995294927131 0.4449339576280447 0.6752360296462393  
0.4350919256533366 0.3454976760562429 0.1604280514509254  
0.9750676263690077 0.8537258510477640 0.0386080822817922  
0.9252504594609569 0.9490509706874460 0.5343080219246541  
0.9249676663156791 0.3519370001507189 0.5300356001262252  
0.9692236335189911 0.4489070142737316 0.0356581634916823  
0.4225559109169466 0.9482274410644053 0.1765373270751743  
0.4755956821909080 0.8439833660487801 0.6614033219553132  
0.3205743007179300 0.4576915079478246 0.6442948896958175  
0.5868237995482415 0.3442278730810404 0.1465848436018531  
0.8225421314155730 0.8531327260524811 0.0468854704126067  
0.0794696778806635 0.9510595264694746 0.5498465412152890  
0.0814911351646197 0.3508458451756559 0.5463662957240543  
0.8151718951583474 0.4498275565318522 0.0467143474022241  
0.5773916270583499 0.9520930174348453 0.1557243586193115  
0.3237709112211480 0.8563378413674946 0.6650097911465069  
0.2668692172861211 0.4319687924210895 0.4226980177757348  
0.6301073595220189 0.3670121747425266 0.9282900956905643  
0.7697427835648933 0.8641207350013492 0.2647019539645079  
0.1279205182938759 0.9391799408042748 0.7749210360171753  
0.1251125364051969 0.3652102390312628 0.7750902162967235  
0.7648422404637877 0.4334315840180916 0.2654506358540338  
0.6257462355881661 0.9387596862245973 0.9307150589243431  
0.2706371212710202 0.8641339037591390 0.4479119366217328  
0.4053891963911448 0.4659154503845603 0.3176161458155948  
0.4983938374435735 0.3191943298650557 0.8224480588872458  
0.9022673913549486 0.8274803101466458 0.3773506097266669  
-0.0015488213137161 0.9764024426431690 0.8822142815221661  
0.0961516884208143 0.3247516196786018 0.8833024677704274  
0.8962555386882103 0.4735375984326703 0.3766301421740298  
0.4925653155065972 0.9593211900003313 0.8252950367702653  
0.4008162637347674 0.82419446656389752 0.3304969090677849  
0.6248775779628430 0.2264859350340637 0.288747786490527  
0.1192826781478330 0.0717678345414827 0.4064581510862722  
0.7776256809409825 0.7306314325869849 0.9173488144429899  
0.7747193865078255 0.5742433316643745 0.9189888854380901  
0.1252415089403843 0.2271097430476546 0.4140780880535271  
0.2721793602454016 0.7329517873380189 0.7999083529109162  
0.6200915793410279 0.0706393843752638 0.3035006393255923  
0.5184523937480147 0.2725656378658087 0.4480975491053097  
0.3754489350218431 0.5218824242101198 0.9427315585953636  
0.0169873866647841 0.0212064182597655 0.2582061804355561  
0.8762363368214241 0.7784361314390225 0.7612806604131005  
0.8763422889078903 0.5243518155355467 0.7617967723115460  
0.0233382104045213 0.2790636931996270 0.2632266520806953  
0.3665355294058386 0.7772538810804578 0.9541552984859114  
0.5155975493549818 0.0235125418428146 0.4485624197435207  
0.4830309368710062 0.2174490609173519 0.6550649834207307  
0.4149248356625814 0.5685808962865943 0.1443609701505527  
0.9714709784991010 0.0722361280434530 0.0577664190184597  
0.9137956648287012 0.7280102793840708 0.5535886697355331  
0.9090789181972670 0.5736726307463084 0.5504334713676701  
0.9746501697127732 0.2285008455419348 0.0616382229617679  
0.4154922721020316 0.7260147802934065 0.1559063917842561  
0.4650605059036543 0.0628601153703094 0.6528076672919426  
0.3258178264468341 0.2381086478884666 0.6342231868396463  
0.5709981632502710 0.5671381596742445 0.1369427605163170

0.8141737331042740 0.0745859378955923 0.0705274248807266  
0.0730436930005757 0.7256347548345529 0.5687036028250255  
0.0687158463634096 0.5701223895646864 0.5655335220951280  
0.8173917589927465 0.2320285616502376 0.0688933539394511  
0.5729227113400304 0.7254097585258850 0.1448500214053085  
0.3101302598673954 0.0821127213742436 0.6387868181303945  
0.2703877535886805 0.2779783602686624 0.4203313858972574  
0.6265465978549446 0.5248559252894882 0.9301046242405554  
0.7667512101013692 0.0220538391538683 0.2815269510669566  
0.1214091916868583 0.7797973083584995 0.7793480902911715  
0.1189542486764878 0.5220369013932955 0.7744936768470420  
0.7690609320942198 0.2775827905014124 0.2782175677876466  
0.6263141126317011 0.7766383022218565 0.9365558464896251  
0.2651865999683327 0.0245216730915129 0.4321714491712640  
0.4007235306214776 0.2278521898439847 0.3081616436660464  
0.4941120322598415 0.5712526150113574 0.8242359427782134  
0.8983233063320214 0.0716395481090316 0.3933303886244262  
0.9952258234274839 0.7284248860742026 0.8959131857444911  
0.9947793606859393 0.5744955368220026 0.8941412171971381  
0.9017698278241347 0.2275601598657558 0.3918343143802151  
0.3970838434360263 0.0735493982725553 0.3186184556008345

Structure 11 S=10/2

1.0000000000000000  
20.1473052208877697 0.0000000000000000 0.0000000000000000  
0.0000000000000000 19.7681594983396742 0.0000000000000000  
0.0000000000000000 0.0000000000000000 13.2309279702280254  
Al Fe H O Si  
2 2 6 198 94  
Direct  
0.2736074644232035 0.5722058516770744 0.7809068460283833  
0.4998661883476552 0.7284276654135393 0.8188249510777438  
0.3347400218201754 0.6260521746137393 0.5844783969668395  
0.4661440086144860 0.6748429936937466 0.6173945537514591  
0.4426777002208946 0.5641688962029531 0.5135983558354577  
0.1952939195620478 0.6461266163049753 0.5771951863835190  
0.2358195381921092 0.6425263482817226 0.4721797543651426  
0.5943979271827746 0.6731910263154716 0.5609106656357801  
0.5632665798572924 0.7269481844035928 0.4882986312240725  
0.2789794759102627 0.5709021521024584 0.3455313538474312  
0.7015127385707826 0.4756965777370233 0.3105727307266018  
0.1952726796628150 0.3289866679884858 0.8098057130473622  
0.2078973422528826 0.8243857218447193 0.4024730318024785  
0.6948997201537042 0.9704306013170824 0.8924646305243343  
0.6934728337141330 0.3266871613952040 0.8854179119569228  
0.2062908699033483 0.4791303930966244 0.3896453687507421  
0.1996631746022677 0.9696685848197852 0.8134620513768760  
0.7067875552046688 0.8205298352968536 0.3078610847221093  
0.5887880778942752 0.4645713906916740 0.4124698930114061  
0.3067571186520741 0.3471214117691947 0.9077763329728586  
0.0968246338662718 0.8323577555771113 0.2983323303029389  
0.8094603055619499 0.9714949237384566 0.7941433360326321  
0.8074824505035678 0.3328157276725640 0.7892215461604193  
0.0920899790739069 0.4672480351629930 0.2947985857475338  
0.3130505291451291 0.9810017950724171 0.9115317884618991  
0.5961629031137096 0.8328852581828032 0.4121916253558356  
0.5921891800141980 0.5370381702998982 0.2458709978255484  
0.3060134730454004 0.2762787421820732 0.7377164730991160  
0.1021177537602331 0.7560936626282846 0.4646566753743852  
0.7947710974039954 0.0426626453041930 0.9622116575739268  
0.8005075195130517 0.2627320174627717 0.9592951803268255  
0.1008648270749491 0.5383513569931414 0.4658118746927871  
0.2908331571779199 0.0553034926043655 0.7476665693041977  
0.5972247701551376 0.7551867641740629 0.2524958541349591  
0.6019408770797412 0.4017624260198343 0.2386111661500491  
0.2861322648874609 0.4110267159719708 0.7325722640852388  
0.1050690541955641 0.8908199249292861 0.4772904738289674  
0.8008610417905079 0.9076572330514014 0.9670676671738221  
0.7924487833941912 0.3978414382195219 0.9610234371614099  
0.1116600273529618 0.4031986381341990 0.4687224957940841  
0.3123724952453297 0.9247610553664506 0.7287296768107902  
0.6060386102282962 0.8897239203869473 0.2290949861706236  
0.5247850473287907 0.4456902295553316 0.5801949736814910  
0.3800950020114021 0.3580107373329733 0.0724989312229276  
0.0257608790979011 0.8578362364139523 0.1349986069804381  
0.8756110564289226 0.9375686462569373 0.6309354744832598  
0.8780089912380782 0.3631838678825005 0.6298287800491871  
0.0176928022223379 0.4432188097305299 0.1344695230534322  
0.3713846257320353 0.9385917217160574 0.0811665364566622  
0.5277250378293337 0.8639439837624648 0.5717498903922784  
0.5110931287070836 0.3548974402298860 0.4310113833530391  
0.3989905171923651 0.4437565241926982 0.9176342886628537  
0.0184059534082577 0.9414557867314042 0.2936205480511143  
0.8782495005407682 0.8566100302881505 0.7932979668659019  
0.8815827111896798 0.4446236306484553 0.7918712842928001  
0.0145228431371756 0.3581728782553408 0.2922820186217878  
0.3556863213366704 0.8556912204631647 0.9238568050208796  
0.5185158110472766 0.9432925848645611 0.4071510648129502  
0.4561178990003803 0.4749158543146590 0.4152503342089980  
0.4342023398700834 0.3160699970483972 0.8994348667386592  
0.9666411774579577 0.8197270459543816 0.3065915890135132



0.9423506341686584 0.9722625862155519 0.7955689150277920  
0.9391056893750488 0.3252203616905072 0.7979773292349640  
0.9624429098151367 0.4805800066333947 0.3089281927143191  
0.4431449654925190 0.9564017209853571 0.9191069825852004  
0.4664286538320301 0.8202278368348881 0.4062955365866988  
0.4877142617409148 0.5106801363167377 0.7419710255627946  
0.4222906198091554 0.2740492836322310 0.2146026248766912  
0.9801408049475686 0.7768610892370178 0.9927873763346630  
0.9145729309465369 0.0245905366268198 0.4923132288279263  
0.9135002125662552 0.2753589151492857 0.4901793966022284  
0.9749391753779945 0.5243592227789245 0.9895220733394802  
0.411492857095099 0.0214057166221832 0.2216720472304438  
0.4942599737764848 0.7679281643344008 0.6981037030723899  
0.3995105734278496 0.4352732944455689 0.6372773103421945  
0.5077781010285660 0.3535001648188489 0.1182957396077399  
0.8987219291996617 0.8639399509422961 0.0842531145455499  
0.0015149496614511 0.9392871782626659 0.5755000915533494  
0.0018257906650060 0.3635655880425812 0.5624815156087442  
0.8915544348589773 0.4386652574114415 0.0785018554936978  
0.4991221614060794 0.9378635820503933 0.1359611250022542  
0.4026258043709983 0.8580852531348465 0.6294363638451590  
0.4942439136424147 0.3779851379804123 0.7442884936213559  
0.4235135248573018 0.4056482119070367 0.2496465220514066  
0.9911511863284743 0.9079850114076827 0.9566370591701924  
0.9081176842861197 0.8939138864244756 0.4494268489830932  
0.9017006841837493 0.4058252383356966 0.4467733184513458  
0.9868323601595504 0.3923003467300455 0.9565664207723812  
0.4070304895458223 0.8898976614388066 0.2591330077188749  
0.4965550125390190 0.8944343449766697 0.7609594050003134  
0.3117055487434811 0.5358670630869523 0.6699527508297124  
0.5998747424629125 0.2715532594271766 0.1949974209879575  
0.8163948187801179 0.7755637972484251 0.0025005438050376  
0.0907799792464956 0.0236840510547399 0.4985736234337808  
0.0934310813644459 0.2732332142097044 0.5064032249475547  
0.8032223372793896 0.5271814406315638 0.0082663986197805  
0.5862025014120777 0.0222215024465499 0.2178204809595405  
0.3072330325087945 0.7904951475458667 0.7290429433437842  
0.2857978966099675 0.4383642545651919 0.5380840571194286  
0.6322383533648697 0.3611549383576999 0.0547247945019296  
0.7715961245319756 0.8598426807493124 0.1437304658748003  
0.1231169332735319 0.9463116902699170 0.6543574285367555  
0.1189403320573628 0.3589190355084800 0.6544434539615035  
0.7657521419412185 0.4364621997057152 0.1446085012069584  
0.6193538321743481 0.9535365264750260 0.0551368936784261  
0.2768517107081711 0.8587614911143298 0.5652963334196360  
0.3300468825515240 0.4679273202859984 0.3532823955193037  
0.5645039440654223 0.3244155451699198 0.8935748420076445  
0.8365310041437163 0.8321514388234706 0.3094452660447038  
0.0713501570187618 0.9735222427079300 0.8330833310305784  
0.0676015437827927 0.3252890789068570 0.8322282300641316  
0.8320140277158832 0.4682186081680771 0.3056735048836581  
0.5677241049345030 0.9786589188080794 0.8729033025310283  
0.3359722713494241 0.8246665342548134 0.3939609854505046  
0.2601686051316837 0.3559187541830910 0.3850974576736100  
0.6260178519328796 0.4436060250615128 0.8956110810102104  
0.7608560605665836 0.9420900725885417 0.3036184157660802  
0.1324381413559952 0.8556435801896292 0.8043401382185158  
0.1268932621771230 0.4439553509809570 0.8107833386079152  
0.7588810569671245 0.3558469805911838 0.3077955001899324  
0.6215401874758472 0.8592440055432046 0.9111241198680510  
0.2718383474537274 0.9427106166591185 0.4092455801678083  
0.4155474647883303 0.5409627820902803 0.2555137110755522  
0.5024066083420367 0.2460885733715814 0.7654308847683126  
0.8949013618862911 0.7588237729470290 0.4441587508249880  
0.9895679101418114 0.0434753079881959 0.9452478763908734  
0.9894477152848229 0.2568707981260297 0.9495164972121699  
0.8861881830787227 0.5412484960964875 0.4437253954224059  
0.4727007221397672 0.0284704495679926 0.7591888504637586  
0.4063904628881474 0.7542707142316395 0.2625212070395888  
0.7048244593303611 0.2332845869614730 0.3068230392422166  
0.1892778661356953 0.5620974910093147 0.7756145611115838  
0.1985949157634878 0.0538025838475281 0.3878886969063804  
0.7031339662997022 0.7556063502951215 0.9025195574934384  
0.6968567104285307 0.5566609759669041 0.8929614596502659  
0.2057404359206047 0.2358023418399023 0.4099404959161374  
0.1949817049487072 0.7362305520878701 0.7945616777433789  
0.6988056302181119 0.0594562714122657 0.3121204900517950  
0.5897198358169313 0.2509480464587605 0.3942821729186938  
0.3078740589677950 0.5413422982926220 0.8909827446699068  
0.0831933129559188 0.0578929270403948 0.3025932513579020  
0.8159888502074329 0.7384635593433088 0.8086174570084118  
0.8144340786376516 0.5598661949576195 0.8125718807783648  
0.0936729916410297 0.2501704397656929 0.3083030570000399  
0.3025922561440244 0.7345663798010378 0.9095798202872564  
0.5868464871239905 0.0577263334028009 0.4123538766834843  
0.6058249654879941 0.1487155973402884 0.2659273298767822  
0.2952114816026394 0.6558031178709656 0.7455220168322002  
0.1100094642957773 0.1490170611069630 0.4426609868008549  
0.7817906486607201 0.6517984007827947 0.9521633122074734  
0.5274684044760469 0.2575888909623511 0.5679111770259112  
0.3740723098449584 0.5293929692381721 0.0658369088638304  
0.0157333487399980 0.0257491393394818 0.1382660786815585

0.8784190796306180 0.7719679396163580 0.6401693913636765  
0.8750224328265631 0.5304015259158359 0.6405371649853426  
0.0214854845323471 0.2700013158782099 0.1423481785596162  
0.3746185303521591 0.7691802380834987 0.0708463737272705  
0.5109591130590089 0.0200774854719553 0.5692594053225359  
0.4576363669924692 0.2351996721353578 0.4003686652677627  
0.4367342120014169 0.5712342618829398 0.9027552298334702  
0.9517300786020241 0.0574756665129789 0.3056850865468930  
0.9481130218255415 0.7428525117835397 0.8033590862638547  
0.9460082613795199 0.5619751159991219 0.8010912212423830  
0.9627020646165697 0.2357533982893075 0.3131223041294814  
0.4340052557857838 0.7485043281238282 0.8939238853097311  
0.4557411946617670 0.0618897494652138 0.4004656911589719  
0.5005103987068611 0.1393464048367955 0.6528066637729223  
0.4030610697976422 0.6486331121273106 0.1432182687674973  
0.9995877553035750 0.1493105501363387 0.0653248035938492  
0.8834720800669810 0.6510253271097770 0.5573777299317464  
0.4059544593252147 0.2331935376584888 0.6277406038341815  
0.4998430886218297 0.5592509989481944 0.1058620365113678  
0.8964270076712834 0.0668843119225839 0.0838644237519160  
0.9930419089019920 0.7266470099339459 0.5683223870375717  
0.9890513618088917 0.5717489526640432 0.5567526188172811  
0.8985870575725650 0.2354009165317008 0.0899021829992281  
0.4993950234162909 0.7391942308548786 0.1202961362635926  
0.3912277422592714 0.0693873998453150 0.6155766275792484  
0.2946868919181980 0.1616790275839080 0.6300036608366293  
0.5974499944468274 0.6478839780886915 0.1351193518209045  
0.7947423572774716 0.1528591096847778 0.0737026737400172  
0.0984817808481254 0.6463473789910924 0.5806328858804349  
0.2976471411744113 0.2807063220445497 0.5392529617062412  
0.6216464272436997 0.5278579463336230 0.0517918483135790  
0.7812279100412283 0.0326878379867053 0.1609591055304693  
0.1002801618603255 0.7685060635810095 0.6639976577606560  
0.0869446781430748 0.5234767069877365 0.6648536956393275  
0.7818950645636287 0.2743353060414949 0.1557092448716575  
0.6216093339851614 0.7694809306074661 0.0585900621857139  
0.2726033687858258 0.0397245929410814 0.5497582821911607  
0.3299239174691501 0.2446020091486144 0.3516133078127570  
0.5679659233992117 0.5648438470275161 0.8762784957196684  
0.8248718997182264 0.0550379068862684 0.3502269910259633  
0.0731630409220069 0.7415361394230180 0.8586257504142338  
0.0709310660023952 0.5594791343261354 0.8589481591537392  
0.8325445355669199 0.2453822938382408 0.3372601074993391  
0.5757127107694603 0.7352814572892939 0.8757697031039113  
0.3270447100663753 0.0609202572389723 0.3671757722141010  
0.4035601345234268 0.1487610300604985 0.2712709659226444  
0.4937972905384351 0.6450370531131255 0.7620607732452703  
0.9005816695801491 0.1493590886942444 0.4311444551097258  
0.9897043888202428 0.6510077275815697 0.9359248079183973  
0.4338661687726791 0.5865228481433810 0.5782922148420888  
0.3845757994980132 0.7086110523838502 0.5949664186859965  
0.2384370670735727 0.6548134921312027 0.5452896326281207  
0.5532359842501586 0.6858914975214248 0.5270532595974607  
0.2853852982248142 0.6160363698890945 0.3755554488399881  
0.3401796874423134 0.6029736521920659 0.4437321656125802  
0.6214542607999693 0.4697257159336418 0.3003349343722314  
0.2740597216449120 0.3410452821636203 0.7957183608338296  
0.1279838594064596 0.8258509992470769 0.4116207412396332  
0.7744523934324631 0.9729643407585810 0.9050768234925893  
0.7732423033819205 0.3293895104962204 0.9003287115549738  
0.1266163388318211 0.4717219240030052 0.4057444654717005  
0.2785121386681834 0.9817826423003022 0.8002171461947797  
0.6267856259443255 0.8253557374379049 0.2978373180418624  
0.5206158309808022 0.4339471557854596 0.4596064071665543  
0.3800346424229359 0.3666761141457124 0.9501388170343235  
0.0269339006808005 0.8631179579348386 0.2571785385300789  
0.8764566782453620 0.9345091718452275 0.7532325269421067  
0.8767524372590819 0.3667831488060898 0.7517070253185659  
0.0213183625566547 0.4368392703534720 0.2562279515057728  
0.3706677584473900 0.9324986303514542 0.9589369431270068  
0.5262169080812300 0.8667156336202194 0.4498540468823806  
0.4753688252763905 0.4431765867953610 0.6772832472876962  
0.4328635307144337 0.3478343326933764 0.1639468764646689  
0.9738945061492071 0.8517889035874472 0.0414174093814771  
0.9254814666468416 0.9488372218064157 0.5362435889373905  
0.9244997588770711 0.3517241825704889 0.5316188976651106  
0.9675949424824710 0.4496609211439555 0.0387052150365602  
0.4227329015887917 0.9467122912213236 0.1745799026313855  
0.4787277921205934 0.8460428427258316 0.6660346354645386  
0.3215620572838004 0.4555861757752934 0.6444338464587387  
0.5852487952641919 0.3468584934697364 0.1515582635526758  
0.8220797679831290 0.8513755688103634 0.0491860387720306  
0.0799642441960625 0.9503902119763274 0.5515253260569477  
0.0807511524771381 0.3494504058392341 0.5484288061251180  
0.8138594954982615 0.4502997111062525 0.0486467964914001  
0.5772607205535814 0.9506559390995739 0.1593016829175030  
0.3249516409765869 0.8564468737710852 0.6635560471715717  
0.2711002519342842 0.4339460054278584 0.4185476328472156  
0.6290070163062195 0.3648658176771399 0.9320288870106155  
0.7692080457454739 0.8644459992458069 0.2660133538538731  
0.1313510913431187 0.9354857591119552 0.7753664942897076  
0.1267504613577393 0.3654854185600281 0.7761457764165822

0.7645526742933021 0.4333379603618837 0.2671417024217326  
0.6257498107808359 0.9394132066699284 0.9342839251236204  
0.2734864748644060 0.8634829515143755 0.4431281032099918  
0.4066313149059820 0.4714965464031973 0.3175057689002007  
0.4985004038715581 0.3172793200560934 0.8257581284163648  
0.9019516903746447 0.8274256747138521 0.3785190745791585  
-0.0014770024388122 0.9732879608266389 0.8833994787428795  
0.9956960478599755 0.3261867711047260 0.8851967669013335  
0.8960972286334359 0.4731192040050466 0.3775838710631559  
0.4948226913711430 0.9639357306167280 0.8266639496992199  
0.4033713408095770 0.8227898606083780 0.3289671604836480  
0.6252208635376804 0.2266014375023239 0.2903470982109365  
0.1212823703292692 0.0708428028295206 0.4091515810088641  
0.7784456261603654 0.7304421121753785 0.9171393524754826  
0.7740353438813302 0.5736317510000214 0.9169768099598575  
0.1258195746189275 0.2275252308953702 0.4165832108505683  
0.2753937205380310 0.7289273414936809 0.7934621634067425  
0.6198872894132520 0.0715137347341945 0.3013822498585140  
0.5213491235527613 0.2742662965493189 0.4482022331602235  
0.3766674382137599 0.5219309428213265 0.9425894096437095  
0.0172853543495185 0.0205641707756719 0.2606191203994287  
0.8800599349086086 0.7773095384149946 0.7624353911260325  
0.8790240516898877 0.5243088194303558 0.7625944648166828  
0.0235402336212742 0.2784923320851728 0.2643738249288314  
0.3684364455155146 0.7757960933287839 0.9481050051030484  
0.5182457378296740 0.0213413913983500 0.4472129752448539  
0.4834040585927651 0.2192051347631900 0.6536025479595032  
0.4232252460761137 0.5699643846639962 0.1417184703202883  
0.9748169040339416 0.0716716527403511 0.0575578196808552  
0.9133250159729727 0.7269800275445606 0.5526540191175356  
0.9089869173947271 0.5736054411474953 0.5501816451369775  
0.9767633803046838 0.2276939766018701 0.0617200396995359  
0.4213785886874919 0.7279303106296222 0.1487310306214333  
0.4682845089980315 0.0645059640669560 0.6500737633837879  
0.3259483163362851 0.2374294167551336 0.6344306027343931  
0.5774691813263041 0.5686239965240327 0.1347050150710954  
0.8169793778733715 0.0739765868053364 0.0700358027118737  
0.0729838072108394 0.7251022825255645 0.5692951986587264  
0.0684315452787945 0.5693258070789918 0.5681715622054966  
0.8193850358048740 0.2309432892447105 0.0686588383943514  
0.5780296500606658 0.7274163296981278 0.14003334438060152  
0.3126480142795850 0.0815106988362956 0.6362708864386227  
0.2735969562417865 0.2786158265685844 0.4219983182552542  
0.6276888963184488 0.5228184198212023 0.9290234202946245  
0.7672082357477882 0.0224579293511206 0.2809819324233694  
0.1255496905299350 0.7754606772615388 0.7806700802156905  
0.1205302482326560 0.5231522987052595 0.7782077805349255  
0.7700368426550978 0.2770298783616768 0.2773336511562895  
0.6290646750694772 0.7790248506242132 0.9359762702503303  
0.2682231392568655 0.0236947071953770 0.4291372420125500  
0.4034094680298444 0.2264637192393699 0.3099764110240927  
0.4963904775201884 0.5716043576660278 0.82092840055819754  
0.8979505820838564 0.0711177985786351 0.3947484099141999  
0.9980436481078169 0.7285371245518319 0.8977870297349432  
0.9960061364786674 0.5734732331850910 0.8965782940786772  
0.9019236201704364 0.2271209704892154 0.3926874907534413  
0.3988754533615795 0.0723028295630307 0.3149841554694939

Structure 14 S=10/2

1.0000000000000000  
20.1473052208878016 0.0000000000000000 0.0000000000000000  
0.0000000000000000 19.7681594983396991 0.0000000000000000  
0.0000000000000000 0.0000000000000000 13.2309279702280005

Al Fe H O Si

2 2 10 200 94

Selective dynamics

Direct

0.2758688213602412 0.5705960335229889 0.7911699691752574 F F F  
0.4975906497663445 0.7284725035884989 0.8157311332398933 F F F  
0.3379585288528951 0.6175015192988148 0.5950607550962846 T T T  
0.4657349902170290 0.6692372754736015 0.6151587381633924 T T T  
0.5261268341796553 0.6871739567677204 0.2968134028129844 T T T  
0.4584839385898000 0.6529877741427111 0.3372984556414880 T T T  
0.4786887813201753 0.7482243920171125 0.4625313608152912 T T T  
0.5144140318231984 0.6796302803711789 0.4318969148666497 T T T  
0.2035782655898366 0.6114435681687997 0.6446419815597995 T T T  
0.1982521551955014 0.6548929024796153 0.5457509688163905 T T T  
0.5925450319936049 0.6404665816990422 0.6835327464634232 T T T  
0.5950962150875920 0.6777903397435404 0.5790301672194051 T T T  
0.2806339348611669 0.5909947664963395 0.4352728490695552 T T T  
0.3606912031773069 0.6374030997043145 0.3220772621196334 T T T  
0.7068901890246408 0.4751917717997500 0.3160588140703950 F F F  
0.1939994814837220 0.3272565851212619 0.8104811164655601 F F F  
0.2078146555409077 0.8210546350060284 0.3954094755737856 F F F  
0.6964319688363858 0.9695104180889373 0.8826207849187568 F F F  
0.6932400433534553 0.3247739807592893 0.8878709452560898 F F F  
0.2058634938984838 0.4844326723870154 0.3969679012830909 F F F  
0.2019023297947982 0.9694375165353151 0.8093973578527951 F F F  
0.7039753311411943 0.8185115362751532 0.2977584780996736 F F F  
0.5930681362238417 0.4676960144224793 0.4149197507879734 F F F  
0.3053208415649635 0.3388333252209677 0.9115986416491637 F F F  
0.0944921136479948 0.8311591621386754 0.2969701041566637 F F F

0.8139328152179743 0.9751306341421682 0.7937278569099178 F F F  
0.8059696176501561 0.3323565832301654 0.7886012079650726 F F F  
0.0958738959685874 0.4655514460444721 0.2905160338524411 F F F  
0.3174915283117201 0.9850202376588939 0.8995562190675841 F F F  
0.5933355848321042 0.8333769548954066 0.3994705517900741 F F F  
0.6018810844602527 0.5398183021140852 0.2456402795801225 F F F  
0.3025688285357688 0.2699643956106357 0.7383382974629598 F F F  
0.1029154771446628 0.7570284879306328 0.4649128120067871 F F F  
0.7912848734460738 0.0424042157464228 0.9645280105520442 F F F  
0.8010457240717201 0.2614262566871091 0.9583658327043807 F F F  
0.0939557637829154 0.5398874767999970 0.4582214897686470 F F F  
0.2907022837529922 0.0539752269174087 0.7349301044332250 F F F  
0.5926520585670190 0.7551481496320349 0.2385493748508125 F F F  
0.6056380032326558 0.4050326084933289 0.2401494212679580 F F F  
0.2901663377743944 0.4055426699744231 0.7392843957361634 F F F  
0.1095518097197541 0.8922169980863330 0.4734298761782938 F F F  
0.8015387756329915 0.9075682268976308 0.9619370682811734 F F F  
0.7932187469417826 0.3965866828784783 0.9615058682917805 F F F  
0.1094015594445921 0.4055984165972788 0.4680135135356380 F F F  
0.3112774917802099 0.9222348851875637 0.7191485646502471 F F F  
0.6051370994019933 0.8885079852800075 0.2157641886006871 F F F  
0.5261081416942801 0.4460452416157281 0.5815265406583237 F F F  
0.3796845822313983 0.3528391455195035 0.0747659815375386 F F F  
0.0232961627633088 0.8558585087458610 0.1343382317228361 F F F  
0.8774279836747425 0.9377831281048117 0.6293887067232120 F F F  
0.8778435683362034 0.3612016284093045 0.6292739109379966 F F F  
0.0168156565102748 0.4454292091885037 0.1340418838499460 F F F  
0.3717742512244868 0.9453311520118461 0.0749786234370831 F F F  
0.5296034973764847 0.8640503468989493 0.5670139786047912 F F F  
0.5201522644579910 0.3554753142060321 0.4314687006410267 F F F  
0.3915269530519652 0.4418202587663345 0.9248779747642288 F F F  
0.0175598775224017 0.9408767068795996 0.2917592206968891 F F F  
0.8773930931149678 0.8568522376103118 0.7914305567751825 F F F  
0.8794763737891600 0.4444312512333894 0.7892667735040249 F F F  
0.0159643525991555 0.3578441689748075 0.2889396577459706 F F F  
0.3507474608860619 0.8591492915300947 0.9239204846931770 F F F  
0.5232329424454534 0.9460555467543514 0.4035033165778401 F F F  
0.4607432863142122 0.4727659760642666 0.4117926472993076 F F F  
0.4336764848363259 0.3167790387756781 0.8989489149598171 F F F  
0.9641521292487525 0.8194027167787112 0.3066798213969051 F F F  
0.9465393734446650 0.9701936084289571 0.7918379323221743 F F F  
0.9372487473254765 0.3251359809406367 0.7996339726166610 F F F  
0.9671506251410662 0.4808490360680153 0.3136724019380637 F F F  
0.4458680807652513 0.9531025348443549 0.9138808382004839 F F F  
0.4610687537597755 0.8294898031547930 0.4058144474468506 F F F  
0.4805384793673966 0.5102310185658325 0.7429487159862731 F F F  
0.4291585944479124 0.2763676106545248 0.2188149099126022 F F F  
0.9790147060057564 0.7754178654669417 0.9900305811426193 F F F  
0.9187718698140301 0.0246149711819186 0.4914292672274598 F F F  
0.9135655073330327 0.2744802126997143 0.4882524881193646 F F F  
0.9772306647451572 0.5249510876540242 0.9854970256958495 F F F  
0.4165178820669695 0.0322519959264724 0.2083208577202953 F F F  
0.4955853248572737 0.7646114191766173 0.6920449945395148 F F F  
0.3998954379274409 0.4309995509626390 0.6332395691355472 F F F  
0.5084266608501835 0.3606278507741294 0.1198401584887492 F F F  
0.8967217423138152 0.8612564692837239 0.0819564718247392 F F F  
0.0029667269998228 0.9353899303089506 0.5697894870294888 F F F  
0.0021944150180104 0.3612809107825683 0.5640320356069282 F F F  
0.8907836601613965 0.4430925248621520 0.0771124803136445 F F F  
0.4996601605677498 0.9417358569797969 0.1274507512975305 F F F  
0.4045449326308344 0.8547197292045823 0.6254438163266656 F F F  
0.4955078371967545 0.3787982491020969 0.7458426661460962 F F F  
0.4197866622815951 0.4087212344053910 0.2466704230149404 F F F  
0.9895784543314505 0.9068593368263720 0.9565859980034830 F F F  
0.9054047312657687 0.8947384135256655 0.4467361845748314 F F F  
0.9032518787240562 0.4054945000436803 0.4476608043960653 F F F  
0.9848103390067919 0.3921940460623645 0.9582509541175597 F F F  
0.4067032472748267 0.9039738649855735 0.2581131585879461 F F F  
0.4984448253784066 0.8913488844337536 0.7559261617515958 F F F  
0.3170072339526442 0.5311655293955369 0.6855943721869906 F F F  
0.5970252364881361 0.2754791239855408 0.1973148247725263 F F F  
0.8101555850336695 0.7756686464577811 0.0031578889734902 F F F  
0.0916601138089490 0.0239272892689755 0.4992091948030080 F F F  
0.0953763206676044 0.2741744545589526 0.5043871716924642 F F F  
0.7980886860563530 0.5268702921181116 0.0085621224477705 F F F  
0.5895535079641547 0.0221240519595867 0.2108834138491673 F F F  
0.3054106080633332 0.7878472731933002 0.7185879333642831 F F F  
0.2802289763940848 0.4405609291848478 0.5486412909946168 F F F  
0.6327164695006502 0.3627190392975663 0.0557650355200749 F F F  
0.7694947325720705 0.8649977702174496 0.1397278148792509 F F F  
0.1230564515665051 0.9447943076556768 0.6531312690051294 F F F  
0.1207150041161924 0.3595477459287650 0.6522349200646218 F F F  
0.7655710772632460 0.4352153198891457 0.1452586940107423 F F F  
0.6200736467653698 0.9553200655062426 0.0453290860174533 F F F  
0.2827702533990717 0.8546763051862669 0.5514614195185246 F F F  
0.33257635040383022 0.4633567308702027 0.3671673760188767 F F F  
0.5639373775387710 0.3235217488435680 0.8965498347900365 F F F  
0.8339643286057807 0.8347601118045205 0.3045576064049911 F F F  
0.0745006424321701 0.9678262970708786 0.8354560205562365 F F F  
0.0660177039440200 0.3313727809018303 0.8291971009198846 F F F  
0.8375242708012323 0.4658587625099528 0.3003215067016001 F F F  
0.5691230776794356 0.9788460922362532 0.8626646934379139 F F F

0.3336976052517713 0.8234852448416277 0.3697314906817724 F F F  
0.2528655046747517 0.35968844762939497 0.3935993365246944 F F F  
0.6266452542682543 0.4418032058071972 0.8926701133499009 F F F  
0.7550040614515154 0.9423217859383826 0.3036468865757413 F F F  
0.1397101731091439 0.8529378599435589 0.7994408856302471 F F F  
0.1329077665105061 0.4460733367493575 0.8055730069508797 F F F  
0.7626601963288380 0.3550212672730169 0.3089509987237591 F F F  
0.6220978065828149 0.8594710566185739 0.9034057541995040 F F F  
0.2701712753874830 0.9406758796915682 0.3993509078425745 F F F  
0.4091913902426683 0.5430817605623872 0.2632584293386344 F F F  
0.5023490708529295 0.2464934429861430 0.7668551407536341 F F F  
0.8875770665600839 0.7601012100134099 0.4413773567189523 F F F  
0.9933826163728909 0.0420404036919422 0.9421536472103256 F F F  
0.9929199714848025 0.2572507295242161 0.9472328980586369 F F F  
0.8854346851950581 0.5404110348236131 0.4425625998818035 F F F  
0.4708524218385577 0.0249638825098302 0.7517948906011043 F F F  
0.4241157333662358 0.7704416461545733 0.2422256505876987 F F F  
0.7037806343799815 0.2351250648395862 0.3037842966992130 F F F  
0.1910135375919637 0.5658626220546026 0.7688516041877023 F F F  
0.1966635515292765 0.0515251070595042 0.3804689763912350 F F F  
0.7040584097922533 0.7560904606026995 0.8845974041085114 F F F  
0.6934906688115916 0.5570848714020755 0.8902556337808960 F F F  
0.2074007235635378 0.2357337488141766 0.4081287406855907 F F F  
0.1946018538394085 0.7302831763169451 0.7821496813515552 F F F  
0.6991171477970965 0.0627833276051675 0.3089476303933694 F F F  
0.5885419114890738 0.2444867799833759 0.3943660588881670 F F F  
0.3031423347043116 0.5419038110323200 0.9060298458264811 F F F  
0.0785292139543685 0.0594188609264847 0.3045751280430551 F F F  
0.8223983400621080 0.7351198169097444 0.8117507597755065 F F F  
0.8131485098257656 0.5600594381461974 0.8144651579061417 F F F  
0.0939527319005649 0.2488895765664196 0.3075141589277166 F F F  
0.2989334132147263 0.7389784356044871 0.9047132944715131 F F F  
0.5845501042733616 0.0636197443875304 0.4029752354942744 F F F  
0.6070411735255732 0.1502822818850049 0.2534904475125614 F F F  
0.3003280900866372 0.6529477861874327 0.7519573305135268 F F F  
0.1123886245494816 0.1489840982225772 0.4429446295943649 F F F  
0.7772514949526510 0.6518936280448884 0.9519281226930048 F F F  
0.5287126962761022 0.2579972956556205 0.5704444852317820 F F F  
0.3740042884517862 0.5305630467006850 0.0751414677202931 F F F  
0.0161864987056006 0.0254811448074221 0.1364467745113558 F F F  
0.8762059576811296 0.7718294625709845 0.6387602651219524 F F F  
0.8693463671777479 0.5318512187217266 0.6397289153471561 F F F  
0.0232149728660502 0.2685548612905819 0.1406587081635706 F F F  
0.3739135888255660 0.7667296270069741 0.0627848720733439 F F F  
0.5139210938332752 0.0237039794003593 0.5636950605239761 F F F  
0.4559952360197457 0.2394304064462744 0.4073869082854529 F F F  
0.4340909144273226 0.5669678865711560 0.9101223863588430 F F F  
0.9470845385536322 0.0547093824906000 0.2998229524926685 F F F  
0.9532336449467280 0.7465710476516279 0.7964721860495843 F F F  
0.9448436625628318 0.5606042809097858 0.7974002148835382 F F F  
0.9624083399364096 0.2363303617758845 0.3105490402042008 F F F  
0.4310227278525289 0.7559138838688781 0.8839266275316646 F F F  
0.4526259118697027 0.0599246932606832 0.3968253391482790 F F F  
0.4995939255658399 0.1397818574039462 0.6552018560286683 F F F  
0.4075734025341902 0.6514563817894370 0.1498232624688498 F F F  
0.0006999142409683 0.148619727600640 0.0610831881364291 F F F  
0.8822964774135684 0.6512672349078557 0.5536727272148525 F F F  
0.4059808657107453 0.2343522176273041 0.6292854848494613 F F F  
0.5004388711071641 0.5568025826334093 0.1178670737579495 F F F  
0.8977321267089593 0.0653604008442201 0.0758912592666832 F F F  
0.9893649721173361 0.7313548171936404 0.5587367937170598 F F F  
0.9855607023386384 0.5685158258924830 0.5629568493750483 F F F  
0.9004536664145064 0.2354521644920027 0.0861361953352429 F F F  
0.5031220392543503 0.7359972435470326 0.0931921840182639 F F F  
0.3926338093413761 0.0689756030095552 0.6067121188031308 F F F  
0.2958309764249520 0.1606720669500703 0.6183773753309794 F F F  
0.5998298448385100 0.6465143170249803 0.1252025538883643 F F F  
0.7966543614284802 0.1523838573550051 0.0755739391170422 F F F  
0.0915093851078694 0.6475448321083945 0.5755731830853534 F F F  
0.2980842699837254 0.2826708120967965 0.5398036010731175 F F F  
0.6189786186909387 0.5244120592904054 0.0496019811037911 F F F  
0.7859771290628714 0.0323918749059757 0.1645602839199185 F F F  
0.0949808886775969 0.7679393253357887 0.6638457897171008 F F F  
0.0909615176917455 0.5242308031316441 0.6577029779126278 F F F  
0.7840941799950727 0.2743037881107000 0.1550329206809522 F F F  
0.6286636281810871 0.7673676516798125 0.0474280653520225 F F F  
0.2749263341542658 0.0385771857747059 0.5375577274175924 F F F  
0.3304836050936686 0.2549376275029545 0.3491219715894118 F F F  
0.5647211762655644 0.5611092745257409 0.8744760191722776 F F F  
0.8229005728109726 0.0519235211828075 0.3581202566646127 F F F  
0.0762640257308149 0.7427097328050607 0.8609484350086092 F F F  
0.0711391407032309 0.5596449541062611 0.8509275477211986 F F F  
0.8318474014256623 0.2418553741637766 0.3367156972003542 F F F  
0.5749950474426129 0.7356608560168354 0.8691888780338743 F F F  
0.3251277190230724 0.0575968334660502 0.3514472891647458 F F F  
0.4015654645982494 0.1539544106728670 0.2771420633264441 F F F  
0.4874135513704303 0.6439608836542305 0.7726365079893611 F F F  
0.9024176212567951 0.1481865574976311 0.4287561455261297 F F F  
0.9901741013718421 0.6510871349879039 0.9282066429448292 F F F  
0.4361781793223697 0.5903411089596736 0.5867040868084606 T T T  
0.3861033688646079 0.7025056453421483 0.6056370390027711 T T T  
0.5082960197158805 0.6468654962220171 0.3301972295658138 T T T

0.5088760213645974 0.7137473000960570 0.4907449975456983 T T T  
0.2273699517446705 0.6238587863901709 0.5818035241734565 T T T  
0.5739440851588782 0.6405851158608090 0.6154076176085762 T T T  
0.3790238706292260 0.6710871378524553 0.3688620508074107 T T T  
0.3264226859731802 0.5895938072323269 0.4596989871505075 T T T  
0.6266732905739048 0.4720570496783978 0.303535285442408 F F F  
0.2735236215866195 0.3352111656563181 0.7987000958356703 F F F  
0.1282293102964545 0.8256537288771639 0.4084156498178970 F F F  
0.7753705811639691 0.9737436053773507 0.9019029874394917 F F F  
0.7730686793495920 0.3283429187519644 0.9007107496029363 F F F  
0.1260392806478237 0.4735248438486224 0.4042490318644170 F F F  
0.2802732261230005 0.9813931403191702 0.7904461309842077 F F F  
0.6240049552774138 0.8246310199202966 0.2866167351140660 F F F  
0.5249679323689662 0.4353776413590538 0.4602445896500598 F F F  
0.3775519928101403 0.3630794845914025 0.9531516273371210 F F F  
0.0246214647207168 0.8621933695292725 0.2563317508160807 F F F  
0.8787408142049387 0.9349087408434897 0.7516228140462573 F F F  
0.8752959212237812 0.3661318738316268 0.7510058634087500 F F F  
0.0236068489544508 0.4368906582692631 0.2551719327347186 F F F  
0.3715997059075136 0.9355198001799110 0.9531236752345649 F F F  
0.5273337679210499 0.8691309304377342 0.4454040411991116 F F F  
0.4750755177018604 0.4425506990853805 0.6762208140005654 F F F  
0.4339188277906487 0.3498167039227695 0.1652560007447832 F F F  
0.9720805101325638 0.8499668152038637 0.0400197174518837 F F F  
0.9266507562627595 0.9480812376573624 0.5337425670881402 F F F  
0.9249991418343200 0.3503397269690822 0.5315770702557145 F F F  
0.9670769776972605 0.4514805486766491 0.0379254645218055 F F F  
0.4242283746192257 0.9556387724013007 0.1665834572122904 F F F  
0.4811067026632472 0.8429579904349893 0.6606428385106682 F F F  
0.3227243914817493 0.4516849494913373 0.6508124035614955 F F F  
0.5856575645177315 0.3511589528076087 0.1534087686750141 F F F  
0.8197819593559501 0.8518748247900589 0.0464565223399305 F F F  
0.0813529958149530 0.9496235098842050 0.5490875196307954 F F F  
0.0813660749058940 0.3499885282322452 0.5470462680617629 F F F  
0.8124406462480209 0.4505139762195682 0.0484286578664239 F F F  
0.5783739437576827 0.9520518187497728 0.1498245712536388 F F F  
0.3262331833962975 0.8540136034766377 0.6547171000256071 F F F  
0.2689297823758139 0.4369979184018575 0.4276390189435659 F F F  
0.6289415708122021 0.3639549601785959 0.9330898770667488 F F F  
0.7657897221451364 0.8658037622765065 0.2619842477785284 F F F  
0.1342741439396704 0.9330753687725135 0.7732763684037067 F F F  
0.1279359076318656 0.3669211088301410 0.7737361400199632 F F F  
0.7679177854216022 0.4323734024598664 0.2678619515852887 F F F  
0.6269053281598858 0.9398327755345761 0.9249233278261642 F F F  
0.2743354098749577 0.8611840485939481 0.4299709594310528 F F F  
0.4060942461481147 0.4713083038156114 0.3224039897064870 F F F  
0.4985954125323033 0.3177840575361941 0.8268369298283602 F F F  
0.8981977464060904 0.8283411392016049 0.3758327883921524 F F F  
0.0008688328707649 0.9709394502838293 0.8822857799161952 F F F  
0.9951405087669798 0.3275775990011383 0.8846169696949104 F F F  
0.8988219852602768 0.4723683238839200 0.3774140254422278 F F F  
0.4959179549244581 0.9616643942863448 0.8193882543268316 F F F  
0.4050301298575434 0.8321316115344999 0.3164115759594495 F F F  
0.6242468548289821 0.2272878358915875 0.2873733794240962 F F F  
0.1205498180177642 0.0707349672979376 0.4079603311824584 F F F  
0.7776379102906219 0.7299072646244795 0.9137205064319360 F F F  
0.7704676491940319 0.5735789982169877 0.9166898042906340 F F F  
0.1274275060306351 0.2275232793186106 0.4154271608168614 F F F  
0.2753734360734228 0.7276902315374087 0.7881104604004250 F F F  
0.6203686826330497 0.0739573826336581 0.2933841420727887 F F F  
0.5234262937075513 0.2746321952712947 0.4504732082003997 F F F  
0.3733123965174840 0.5202715802288296 0.9527482304491812 F F F  
0.0150019140843938 0.0200429397738020 0.2587770223986254 F F F  
0.8822001700755635 0.7776456588658220 0.7605915604270521 F F F  
0.8764008713796514 0.5242523630395226 0.7613201944472934 F F F  
0.0243564507092842 0.2778884153160277 0.2625493892224355 F F F  
0.3656317052221496 0.7791673103288232 0.9416809450196553 F F F  
0.5186267711672627 0.0241518855942076 0.4414132141343288 F F F  
0.4834529400189069 0.2198787344611333 0.6549856209962428 F F F  
0.4238612197484315 0.5709888511731052 0.1502365821296081 F F F  
0.9764727986208328 0.0708410307582241 0.0535233489306464 F F F  
0.9093962648701321 0.7281171546660232 0.5483826763685755 F F F  
0.9059795646367661 0.5731643983142689 0.5498070609321957 F F F  
0.9786901971825088 0.2272892155428607 0.0586948456389536 F F F  
0.4271301155107921 0.7304446704127514 0.1355375452608030 F F F  
0.4688484097796177 0.0647007408446498 0.6453247328323215 F F F  
0.3258036446770660 0.2364956271606005 0.6322311774228666 F F F  
0.5794785649088894 0.5673538874332706 0.1356192930393263 F F F  
0.8180233692101098 0.0733376839147013 0.0702183478182903 F F F  
0.0687620405186209 0.7266069157462240 0.5663190604974488 F F F  
0.0652473963822260 0.5694820890517036 0.5637496060562412 F F F  
0.8209562416379441 0.2305013837462297 0.0678553147231611 F F F  
0.5808943749483575 0.7260279002578542 0.1234882781315960 F F F  
0.3138383519896877 0.0806531836417079 0.6246887990322136 F F F  
0.2726061694150914 0.2826118631439414 0.4229832304032115 F F F  
0.6254430867098293 0.5207742175878849 0.9269632134584072 F F F  
0.7666361334846528 0.0225287263146186 0.2828902982678514 F F F  
0.1265845047027341 0.7734996341412312 0.7769605667550934 F F F  
0.1224951792021542 0.5244038999728176 0.7719254361493739 F F F  
0.7708348602213064 0.2763256150005873 0.2764143813538027 F F F  
0.6309624772662943 0.7790339272531099 0.9242524195439685 F F F  
0.2674917465538655 0.0218451417628742 0.4176945595225661 F F F

0.4040870021136627 0.2318048691639234 0.3139437315087008 F F F  
0.4914022714358097 0.5695111350304458 0.8245314195012057 F F F  
0.8976279266058782 0.0697319351249561 0.3943194539508283 F F F  
0.9998087780368508 0.7292027279905255 0.8939639748363177 F F F  
0.9962857798006510 0.5731758091870702 0.8906508739902677 F F F  
0.9022464382312236 0.2261105993306103 0.3908223269242868 F F F  
0.3985160698156918 0.0752283064320309 0.3089084869845777 F F F

Structure TS reaction 14→2xH2O/15 S=10/2

1.0000000000000000  
20.1473052208878016 0.0000000000000000 0.0000000000000000  
0.0000000000000000 19.7681594983396991 0.0000000000000000  
0.0000000000000000 0.0000000000000000 13.2309279702280005

Al Fe H O Si

2 2 10 200 94

Selective dynamics

Direct

0.2756892105471991 0.5702049492845660 0.7901823430620496 F F F  
0.4975205498007682 0.7286312207977588 0.8151486389366340 F F F  
0.3399000140484861 0.6175442489625793 0.5956034851554004 T T T  
0.4669732845647757 0.6691196230122846 0.6098681273920933 T T T  
0.5165661894658463 0.6778398598107224 0.2956603396256369 T T T  
0.4376939208636038 0.6523609324040791 0.3548699112806291 T T T  
0.4786458395146141 0.7493106484720036 0.4677897600533350 T T T  
0.5093565737946935 0.6730475192309188 0.4164992690327377 T T T  
0.2061886306238355 0.6291072694283925 0.6415513356699616 T T T  
0.2019980728777344 0.6323493262251805 0.5241848647700516 T T T  
0.5903145113705650 0.6410805534216750 0.6789325798887267 T T T  
0.5904157849121794 0.6739865854028880 0.5704085279491743 T T T  
0.2873430361818809 0.5997156471644912 0.4198977266603305 T T T  
0.3578024725689767 0.6534931216966304 0.3120419119888463 T T T  
0.7064240544211486 0.4744160961361956 0.3161307277775123 F F F  
0.1945737726073560 0.3272407373353730 0.8110068144914138 F F F  
0.207175552585017 0.8209583041336259 0.3946676204684962 F F F  
0.6960872396602369 0.9713700103093927 0.8820312585526722 F F F  
0.6938594845978088 0.3241656064510323 0.8874388031603573 F F F  
0.2061979420400561 0.4846130649292135 0.3977570676631288 F F F  
0.2016525844800299 0.9700131494745605 0.8090260787970678 F F F  
0.7031539857356535 0.8189894609844544 0.2974489650201164 F F F  
0.5920633602866729 0.4680135989987875 0.4143708907747552 F F F  
0.3058796983881891 0.3400179479917966 0.9118201208673113 F F F  
0.0933493569229356 0.8297844864049040 0.2972279951753265 F F F  
0.8136730575712008 0.9747985878209064 0.7932738169096964 F F F  
0.8066452974292062 0.3322419449039558 0.7888454760758634 F F F  
0.0959259391224379 0.4664779257813336 0.2911937691346651 F F F  
0.3175039282011767 0.9848268691344302 0.8982844919754456 F F F  
0.5920630411422536 0.8323488286090566 0.3984501230951167 F F F  
0.6022892175634240 0.5407128959323586 0.2462190335878489 F F F  
0.3034350837829152 0.2701910059178019 0.7392228051810221 F F F  
0.1037332274161002 0.7559422876750403 0.4658185897140683 F F F  
0.7920568103696439 0.0421666956638020 0.9643452015694223 F F F  
0.8019383859410283 0.2615213508993719 0.9588216749759368 F F F  
0.0948458488244341 0.5410440389100586 0.4589398734362078 F F F  
0.2911101786912624 0.0536290041361198 0.7340345368936809 F F F  
0.5926311700247240 0.7543574186434725 0.2378907443667231 F F F  
0.6044068649277818 0.4059377967217443 0.2390151434514607 F F F  
0.2900791276612438 0.4056345087196149 0.7385960535564493 F F F  
0.1085422561838598 0.8913698801995196 0.4730340865646880 F F F  
0.8000147307040066 0.9071044238036450 0.9610920284664530 F F F  
0.7931902565923323 0.3966362774065288 0.9615985482899418 F F F  
0.1088202016479585 0.4066497057338694 0.4689209539316295 F F F  
0.3102703740408472 0.9215993689817239 0.7181723755039258 F F F  
0.6036915374364895 0.8878651262285757 0.2147135083716307 F F F  
0.5263632869325576 0.4473709400737462 0.5823160826237341 F F F  
0.3801277662414080 0.3525624764604629 0.0753591525510231 F F F  
0.0224408858675176 0.8551422472850732 0.1342877368690978 F F F  
0.8775763043074036 0.9378850243320400 0.6294510722936479 F F F  
0.8782809011179609 0.3612501789253457 0.6294977566457476 F F F  
0.0173929183857666 0.4458748394427019 0.1340280242618093 F F F  
0.3714735879089517 0.9462392061826037 0.0738431111331295 F F F  
0.5291988062476065 0.8644961950724479 0.5663941466057949 F F F  
0.5202372454224502 0.3554948862432141 0.4340515431587733 F F F  
0.3925540232646298 0.4426271474860854 0.9269922609206560 F F F  
0.0171091207494385 0.9401642123972636 0.2914669354997272 F F F  
0.8780502094374114 0.8568204407963549 0.7913595446789827 F F F  
0.8800957595816215 0.4444040817172592 0.7895457621571467 F F F  
0.0168664174029445 0.3581745215175260 0.2888154652265200 F F F  
0.3496406931432574 0.8588090141115768 0.9245922575065748 F F F  
0.5245070925735646 0.9461841408033465 0.4030185275589631 F F F  
0.4593151706366143 0.4722039929252873 0.4135662794864174 F F F  
0.4341433848995209 0.3176584915569620 0.8990270748103129 F F F  
0.9630686079636916 0.8188270101857213 0.3064113696803759 F F F  
0.9461400538438838 0.9707935916245418 0.7924698113007196 F F F  
0.9378800592602232 0.3251798158366697 0.7998233875214424 F F F  
0.9669383263972620 0.4808392204189929 0.3131978645356170 F F F  
0.4456172507175822 0.9517999760261091 0.9129093415729557 F F F  
0.4593688294554070 0.8315064172049276 0.4053444370695658 F F F  
0.4798545027687808 0.5101188082809074 0.7448649524338791 F F F  
0.4300385763758356 0.2773877712520729 0.2206545397245989 F F F  
0.9779661781552988 0.7756323063959414 0.9892388652596082 F F F  
0.9191308552124084 0.0244393450306077 0.4910469454538244 F F F  
0.9137482321265367 0.2740979197307212 0.4888935009513560 F F F

0.9767980902178834 0.5250260088589300 0.9855180639363184 F F F  
0.4161483313613346 0.0338169423388237 0.2063441919526170 F F F  
0.4961061394819879 0.7646480678269256 0.6919539299587214 F F F  
0.4004088158815549 0.4305556131472343 0.6342365060547905 F F F  
0.5093881625399703 0.3588902891589782 0.1170847579388123 F F F  
0.8959022498843439 0.8617535579187745 0.0812713562510226 F F F  
0.0030965227267856 0.9356551171369034 0.5704197328171219 F F F  
0.0027158306880324 0.3603534535523281 0.5650444081717083 F F F  
0.8913151672851214 0.4420851600238223 0.0772455428598633 F F F  
0.4995487692550356 0.9432994276612447 0.1259538039546371 F F F  
0.4044469190128694 0.8544660576832470 0.6258325732656331 F F F  
0.4967729805186778 0.3789430765787358 0.7458786133902535 F F F  
0.4236254869187874 0.4106633083814302 0.2441551311570151 F F F  
0.9892716609731167 0.9072217543978383 0.9570259628041669 F F F  
0.9057114868037885 0.8944180982344392 0.4472118453304574 F F F  
0.9043924186997074 0.4051127212916583 0.4478553199166058 F F F  
0.9859031295960463 0.3923635899817270 0.9581413469278814 F F F  
0.4067151712083401 0.9052712396722100 0.2563039925265045 F F F  
0.4990353006801271 0.8903793186704263 0.7557781538378094 F F F  
0.3166600965217725 0.5310554944369841 0.6841712069908610 F F F  
0.5987914949286903 0.2760195875978368 0.1974500157569068 F F F  
0.8091915692277212 0.7757004280336730 0.0041179439735899 F F F  
0.0925063269884703 0.0233821736686650 0.4992142787461802 F F F  
0.0967616004188443 0.2746860105846523 0.5042254772765631 F F F  
0.7990124089255559 0.5266700081044178 0.0097171733297401 F F F  
0.5903696559115232 0.0219796055943675 0.2105681973228997 F F F  
0.3046974887805618 0.7873041313182014 0.7169708924533253 F F F  
0.2817671673090274 0.4403352361321780 0.5472337008630248 F F F  
0.6341050361591272 0.3628085086020434 0.0555325348647742 F F F  
0.7689508048718281 0.8657423523640304 0.1399318932932019 F F F  
0.1236025339219182 0.9438290793468695 0.6525671058015163 F F F  
0.1215240698523630 0.3596438484168019 0.6525551990629737 F F F  
0.7660335154698146 0.4347451065043160 0.1457551290385268 F F F  
0.6202643191181707 0.9552394103854738 0.0448591785123114 F F F  
0.2832200011981811 0.8545076425106117 0.5497363833486801 F F F  
0.3318797843876311 0.4587939244906281 0.3630260295277878 F F F  
0.5645529181196736 0.3234593042330047 0.8970047663403236 F F F  
0.8330957404118990 0.8355700873056620 0.3052101136508867 F F F  
0.0742347831137948 0.9665736648778491 0.8344364572494740 F F F  
0.0666169634889187 0.3305755344724375 0.8292051868158552 F F F  
0.8372220696350112 0.4651764014890887 0.3016082392769022 F F F  
0.5687584696696746 0.9784085883526217 0.8624163275150352 F F F  
0.3323269022677238 0.8248561618631953 0.3662324135467614 F F F  
0.2493645814374901 0.3583513708190651 0.3958350737366843 F F F  
0.6277133292440737 0.4415426872407195 0.8922885276955057 F F F  
0.7539636538762196 0.9429261759834304 0.3037193230846924 F F F  
0.1412327573044365 0.8525306369475345 0.7992881569226569 F F F  
0.1328644548366071 0.4458380072935100 0.8064597212085118 F F F  
0.7623613079815712 0.3544053682331167 0.3092649835905235 F F F  
0.6242934958596820 0.8597384479686880 0.9027071806962752 F F F  
0.2681461745464091 0.9412844228903978 0.3989854688105439 F F F  
0.4075110766073067 0.5435655527315291 0.2650033362504658 F F F  
0.5025490632813217 0.2466528003585537 0.7676304916294541 F F F  
0.8863180948679314 0.7600225433461247 0.4414742448861944 F F F  
0.9948183826649171 0.0422729772273556 0.9418952409870371 F F F  
0.9930271896440956 0.2572980821521185 0.9478186268656614 F F F  
0.885476259016720 0.5399449307001234 0.4430010406366804 F F F  
0.4701975049635223 0.0233906015599885 0.7503692793536487 F F F  
0.4230555793517894 0.7709020085951792 0.2423249121161035 F F F  
0.7043380991313910 0.2342448397580412 0.3050569374409804 F F F  
0.1908698845646697 0.5658550791053401 0.7697584217235018 F F F  
0.1967758450291299 0.0534570692728735 0.3799921580189363 F F F  
0.7039479957694823 0.7545335832378726 0.8843505119466215 F F F  
0.6936132165264439 0.5573330799321710 0.8933646098971479 F F F  
0.2081288339471143 0.2330920514318464 0.4091973047455610 F F F  
0.1942390701930066 0.7291485802110529 0.7808463358992910 F F F  
0.6996396649109187 0.0640784646191435 0.3077546910211026 F F F  
0.5884994802881920 0.2448050007946563 0.3941124240592586 F F F  
0.3038917423384433 0.5420227036411731 0.9049609121100559 F F F  
0.0784221728751078 0.0584882334542627 0.3047299255254359 F F F  
0.8229932216150431 0.7352480733788482 0.8127484910580094 F F F  
0.8125571775736802 0.5592005364297279 0.8150408909915754 F F F  
0.0950963777931761 0.2494315239066225 0.3075299399373819 F F F  
0.2985184266312970 0.7386488618592111 0.9035368550263527 F F F  
0.5850100842062176 0.0640809223188654 0.4022702026249689 F F F  
0.6068732139434587 0.1506486092218182 0.2528062595856113 F F F  
0.3006280608396494 0.6524731956651451 0.7510318820992552 F F F  
0.1106670392022622 0.1489550780914755 0.4428115715453487 F F F  
0.7784190035519245 0.6516211003397601 0.9527158426124203 F F F  
0.5295369778355834 0.2567634797779874 0.5711699970557547 F F F  
0.3733768945189269 0.5319417468977434 0.0757693553283474 F F F  
0.0166128786569928 0.0250450868651484 0.136237934606016 F F F  
0.8761123273796443 0.7714974193870177 0.6389083004020293 F F F  
0.8689835131275458 0.5319131122997618 0.6401628639320620 F F F  
0.0238326907909325 0.2685296541514575 0.1410287592600241 F F F  
0.3736713736482642 0.7656901328002377 0.0618620021393639 F F F  
0.5142714462655746 0.0244322602435787 0.5626560222874275 F F F  
0.4559635941672227 0.2396249358367371 0.4088707471670077 F F F  
0.4347339437295759 0.5680460241907284 0.9116769453769535 F F F  
0.9469800290273866 0.0542520846156691 0.2991574129121162 F F F  
0.9537899696768122 0.7463111463229097 0.7956231677239316 F F F  
0.9442900182539447 0.5612560434739464 0.7977504989635378 F F F



0.9635266470413129 0.2366357049321124 0.3115332405160842 F F F  
0.4305179897660665 0.7561973641580266 0.8825405775978084 F F F  
0.4531200321984130 0.0595031691998855 0.3949840079365146 F F F  
0.4994217470269007 0.1393011942832274 0.6578050055509479 F F F  
0.4069886501594695 0.6518478158971917 0.1533892426416870 F F F  
0.0013157479379657 0.1485836526079609 0.0615698659484067 F F F  
0.882668953683200 0.6509969243156348 0.5536066651244695 F F F  
0.4064830334981693 0.2343512103536511 0.6295789121098565 F F F  
0.4998606255420697 0.5574132432473249 0.1205888631840608 F F F  
0.8985087644094492 0.0651601732274685 0.0749704167260248 F F F  
0.9891855488414478 0.7317841923379333 0.5569582886311366 F F F  
0.9855762374420891 0.5675298074483024 0.5633432859563499 F F F  
0.9009466689213212 0.2353234665114243 0.0872701220124696 F F F  
0.5027702255087831 0.7353572173029548 0.0935786057173047 F F F  
0.3928598436675301 0.0691279263259048 0.6053145940421913 F F F  
0.2961869990986870 0.1608239455760696 0.6191867710665804 F F F  
0.5999095658147482 0.6461693043185335 0.1233684899783967 F F F  
0.7973556885287536 0.1521298936885103 0.0753439996909648 F F F  
0.0908697426344602 0.6474005615937557 0.5784754847295943 F F F  
0.2982258919704392 0.2824929591633989 0.5405240040828971 F F F  
0.6175494800317409 0.5229268627951029 0.0503511652847806 F F F  
0.7869910460611607 0.0322000328990413 0.1645315559723741 F F F  
0.0938226396371959 0.7683377649080398 0.664645229964090 F F F  
0.0911304226679661 0.5234319799002591 0.6580208304958362 F F F  
0.7840929983441143 0.2737305793720708 0.1553789808262849 F F F  
0.6283655991856847 0.7676218745085777 0.0470433016792597 F F F  
0.2749238980435678 0.0391654494271449 0.5368222003537682 F F F  
0.3307167658825207 0.2568323285294412 0.3494559583956658 F F F  
0.5651230716997233 0.5605898941290306 0.8747654529480826 F F F  
0.8229909569350013 0.0518673659774009 0.3583974544846882 F F F  
0.0764980400804234 0.7433215719012267 0.8619757670484418 F F F  
0.0707529239752702 0.5593311649943260 0.8507688468132457 F F F  
0.8327232605334345 0.2418411941436176 0.3364335571485455 F F F  
0.5745906028662375 0.7367027061483995 0.8692637027183352 F F F  
0.3253737615144487 0.0571441410412987 0.3507398191073392 F F F  
0.4009788412906161 0.1548360270796607 0.2784139105880499 F F F  
0.4886548085792199 0.6439481925147916 0.7727246384158022 F F F  
0.9030713241509289 0.1479789247322572 0.4283044915633667 F F F  
0.9904856934321415 0.6512323375618863 0.9283966654599141 F F F  
0.4341078550862754 0.5889240560037645 0.5879186123706414 T T T  
0.3872894576042883 0.7027170059185819 0.6036191505657066 T T T  
0.4985371554703925 0.6453959814763033 0.344102684778408 T T T  
0.5082915593321033 0.7138015316789798 0.4934256242964069 T T T  
0.2322846314216931 0.6395924487154320 0.5805759046654173 T T T  
0.5714535168777846 0.6374094988581039 0.6111644929554659 T T T  
0.3807846405011632 0.6687952676417763 0.3732264109831649 T T T  
0.3287350754690824 0.5884562660191537 0.4544530669745622 T T T  
0.6261786748840521 0.4722781192495020 0.3033731052902766 F F F  
0.2740438046263307 0.3355264045829358 0.7990363183435747 F F F  
0.1276135437574268 0.8248221780064782 0.4083667735519327 F F F  
0.7750855039467126 0.9739391331963390 0.9013917551842354 F F F  
0.7736418739137534 0.3281692893840145 0.9008433920145222 F F F  
0.1261081979721013 0.4742442980231587 0.4049382695345187 F F F  
0.2800868075721397 0.9811631876720242 0.7894367313466688 F F F  
0.6231335777046780 0.8242418391235944 0.2858777549096416 F F F  
0.5244375197257440 0.4356764616616644 0.4612310858415825 F F F  
0.3781517063980004 0.3637696272990922 0.9538400563133393 F F F  
0.0237556912030001 0.8613862838434798 0.2562790309818013 F F F  
0.8787938248358884 0.9349303384592886 0.7516674423879124 F F F  
0.8758960710638561 0.3661250978073056 0.7512470110990037 F F F  
0.0239251339132096 0.4372864667358627 0.2552135128691049 F F F  
0.3712183406963092 0.9352216951483427 0.9522731521591723 F F F  
0.5267453549568231 0.8690644932140970 0.4448287396653825 F F F  
0.4754820952763552 0.4428729932058317 0.6771626938080573 F F F  
0.4352567209240661 0.3499890351188810 0.1646855163449601 F F F  
0.9712916987633591 0.8500442127761758 0.0397486422330644 F F F  
0.9268523959194326 0.9480307705466444 0.5338759606351573 F F F  
0.9255611991556592 0.3499397714127639 0.5320730364522319 F F F  
0.9675177971141622 0.4514128135373170 0.0379228996582128 F F F  
0.4241203700999705 0.9571158378901714 0.1649343800911325 F F F  
0.4812113517418979 0.8425512888440068 0.6600792090813172 F F F  
0.3232341143146229 0.4514843439445926 0.6503452519552724 F F F  
0.5864534738149629 0.3511836727280055 0.1524785757083365 F F F  
0.8188523401331125 0.8521303248091883 0.0463818913065595 F F F  
0.0814971527406883 0.9491614313399239 0.5489939626037312 F F F  
0.0819579122168719 0.3501513793472455 0.5475348619009353 F F F  
0.8129295472289613 0.4500798568297313 0.0489542777844036 F F F  
0.5783342839775827 0.9521934275763471 0.1491319039707548 F F F  
0.3259933583569605 0.8535815741985076 0.6536867104606401 F F F  
0.2684485784824844 0.4354646163049694 0.4269565065285903 F F F  
0.6298297285556700 0.3637142183926585 0.9328599575610355 F F F  
0.7649549523338592 0.8663951508757535 0.2621509794403494 F F F  
0.1346126351969019 0.9325609248017415 0.7728563435618057 F F F  
0.1284066400760082 0.3667502409776162 0.7742020357339641 F F F  
0.7677438887094183 0.4317833344787019 0.2683748075562065 F F F  
0.6271816155988716 0.9401654409233657 0.9243341645740415 F F F  
0.2734521783234882 0.8617314849078781 0.4286639425187815 F F F  
0.4059952294175631 0.4708923995924792 0.3222932447440812 F F F  
0.4991992343409208 0.3180910321837587 0.8272227729927977 F F F  
0.8974112148435154 0.8282762354520230 0.3760724530884332 F F F  
0.0009666250342875 0.9709374582146637 0.8822055739147743 F F F  
0.9957515342498979 0.3274668498321063 0.8848382979820784 F F F

0.8989712316574483 0.4719740096787248 0.3777704958674875 F F F  
0.4958029788293388 0.9606834554574988 0.8186999088404363 F F F  
0.4042990274974869 0.8337066517843610 0.3150764321127326 F F F  
0.6247456754539300 0.2273424139954656 0.2876355321609694 F F F  
0.1202945041050612 0.0708069617365013 0.4079218120259327 F F F  
0.7777994005746010 0.7295637261835779 0.9142211361454144 F F F  
0.7708828505311942 0.5732932017546588 0.9180814702213738 F F F  
0.1278063023401472 0.2271265530904429 0.4155977411465912 F F F  
0.2751326467250337 0.7271349474900433 0.7868668775029661 F F F  
0.6207322281361130 0.0743697286499270 0.2926358534875533 F F F  
0.5236919115793839 0.2745036397776843 0.4515951519383137 F F F  
0.3737662933598074 0.5211797419919293 0.9533378440939870 F F F  
0.0149105674980561 0.0193646551330247 0.2585201193216875 F F F  
0.8825843661694677 0.7775444409830357 0.7606654487611522 F F F  
0.8761901927905598 0.5242178536130453 0.7617338064932682 F F F  
0.0252666220826541 0.2781626320073869 0.2628491292240085 F F F  
0.3651774081216672 0.7788128583084841 0.9408448696350575 F F F  
0.5191923224926001 0.0242642669713504 0.4404150281909196 F F F  
0.4838137364342998 0.2194874782836749 0.6560273352807329 F F F  
0.4231727473985387 0.5713481376629232 0.1520144400019205 F F F  
0.9773001801097649 0.0707516221739013 0.0532728966090659 F F F  
0.9091195660951499 0.7280511331724497 0.5480695195542680 F F F  
0.9060105475483340 0.5727972183930916 0.5501705881008263 F F F  
0.9791403283327398 0.2272303740152068 0.0593122730972340 F F F  
0.4267867305343316 0.7304750127503183 0.1358076313122751 F F F  
0.4688638284988329 0.0643472252946395 0.6449372709307397 F F F  
0.3263194510392324 0.2365516351885333 0.6330226934910641 F F F  
0.5792200367372899 0.5672225481356392 0.1359515447856410 F F F  
0.8188021786207429 0.0731159071294130 0.0699546374511826 F F F  
0.0684582528868489 0.7264272785388073 0.5671107674748157 F F F  
0.0652581810115649 0.5693026092664439 0.5649317154185383 F F F  
0.8214899195223850 0.2303177543555535 0.0682853848749687 F F F  
0.5808657901140535 0.7257211466805984 0.1227412540945139 F F F  
0.3141314629332399 0.0807629233583498 0.6240968656454484 F F F  
0.2720840662014083 0.2818333830505537 0.4240516544436517 F F F  
0.6255306215907268 0.5202528296002384 0.9278069690064541 F F F  
0.7667810343878472 0.0229244531812896 0.2826517922790543 F F F  
0.1266763193895528 0.7733014355324244 0.7770620022824346 F F F  
0.1226439310324352 0.5241942896085163 0.7723631127381836 F F F  
0.7711096165155240 0.2757463665981561 0.2768417881604464 F F F  
0.6312938181337344 0.7791430300678002 0.9238137722012993 F F F  
0.2671310520337116 0.0225340586986604 0.4170366314453560 F F F  
0.4042206404982025 0.2326767933851528 0.3151308655584941 F F F  
0.4917429721980184 0.5698998539366400 0.8253616623922895 F F F  
0.8978647202428647 0.0695402089463855 0.3940004829086945 F F F  
0.9998819368515157 0.7293180806190307 0.8938520658121476 F F F  
0.9960840779537108 0.5732813779376755 0.8907352280368386 F F F  
0.9029568288437488 0.2260239343159540 0.3909885256680781 F F F  
0.3985417669939935 0.0757153987363210 0.3081955762268223 F F F

Structure TS reaction 2xH2O/15→2xH2O/22 S=8/2  
1.0000000000000000  
20.1473052208878016 0.0000000000000000 0.0000000000000000  
0.0000000000000000 19.7681594983396991 0.0000000000000000  
0.0000000000000000 0.0000000000000000 13.2309279702280005

Al Fe H O Si  
2 2 10 200 94

Selective dynamics

Direct

0.2745882720737853 0.5678897837560442 0.7950619981699560 F F F  
0.4969002421024129 0.7276433218442406 0.8086149123147450 F F F  
0.3316272935707403 0.6181082000583373 0.6063762891166604 T T T  
0.4655579626826665 0.6670792155339882 0.6035786138285673 T T T  
0.5495645192130851 0.6880405521788546 0.3114707317083898 T T T  
0.3946170687542221 0.6718159898545153 0.3139381940571653 T T T  
0.4306781523912093 0.692324052372931 0.4336776484252383 T T T  
0.5100737142127940 0.6373003090553269 0.3760229526885226 T T T  
0.1986500606145185 0.6428734328051817 0.6429872967915955 T T T  
0.2034696279293868 0.6510333758953948 0.5254577851781264 T T T  
0.5919303354447365 0.6557462174196615 0.6697157675446448 T T T  
0.5906293519540284 0.6833786027885012 0.5585594718748723 T T T  
0.2770487042284628 0.5746168024313292 0.4450362073248542 T T T  
0.3550804784810566 0.6414903038408326 0.4114993329374386 T T T  
0.7070913185032595 0.4721786246274107 0.3187324023001565 F F F  
0.1954885298423932 0.3269650855490340 0.8129433444726430 F F F  
0.2064073090232554 0.8206704715588131 0.3940125396804675 F F F  
0.6955817038358916 0.9704745493914544 0.8790225565590646 F F F  
0.6942783833647894 0.3252328633210553 0.8865173448961983 F F F  
0.2070126815442777 0.4847586822496339 0.3994929800197511 F F F  
0.2016211854424697 0.9711103593970094 0.8073927630874280 F F F  
0.7035427589841134 0.8220931051814233 0.3009548553552079 F F F  
0.5908972979325782 0.4694258574956223 0.4127785508420274 F F F  
0.3069293007161349 0.3430199696967975 0.9132511269193628 F F F  
0.0927286986189415 0.8282996755789043 0.2965965891728928 F F F  
0.8138016251145785 0.9744933678127765 0.7930278486886806 F F F  
0.8073706244481116 0.3328158184450203 0.7893231361097364 F F F  
0.0966069206976528 0.4677277205073125 0.2923790598771419 F F F  
0.3171286062628837 0.9833026125351978 0.8978695738448934 F F F  
0.5899044383011613 0.8290674475675814 0.3966022003119889 F F F  
0.6063057288574925 0.5406418459589730 0.2439132479176607 F F F  
0.3053252732027545 0.2707941211795841 0.7422608139760456 F F F  
0.1037673652594364 0.7545024955422619 0.4657756903853141 F F F

0.7903582532962119 0.0414268779269733 0.9640724010952084 F F F  
0.8021680773014239 0.2622536331746872 0.9594030628358254 F F F  
0.0967319537758442 0.5423771294826523 0.4607380041062612 F F F  
0.2934984833758776 0.0520820768724803 0.7329399368418876 F F F  
0.5976346113916478 0.7546212043849110 0.2343428489249177 F F F  
0.6043072359308397 0.4060432686050746 0.2390721536076938 F F F  
0.2896747059975198 0.4057874135048820 0.7387209698095845 F F F  
0.1067815610075087 0.8899123495180561 0.4722941260708708 F F F  
0.7987519245772603 0.9064080413635125 0.9602452034734839 F F F  
0.7932814643990937 0.3972501409816047 0.9619867630977410 F F F  
0.1084646088918646 0.4077939851318462 0.4706257374849443 F F F  
0.3095995420555653 0.9194122445418458 0.7185666816717315 F F F  
0.6034024713011874 0.8887118691440108 0.2148958906871954 F F F  
0.5269794358006621 0.4476256962625413 0.5824774937316803 F F F  
0.3813234229943916 0.3519586064607765 0.0766179565300504 F F F  
0.0212764982722717 0.8539663972429707 0.1339956819197212 F F F  
0.8779881638627884 0.9382629811852539 0.6295575532035045 F F F  
0.8789699334448287 0.3615903636593671 0.6301052225062023 F F F  
0.0182794523628687 0.4473346530725593 0.1339541748654653 F F F  
0.3721689959624612 0.9461506261390653 0.0724331068062938 F F F  
0.5290911483034222 0.8650118489967156 0.5646895004439187 F F F  
0.5213719852659224 0.3552646079739574 0.4349095369846054 F F F  
0.3956098276235593 0.4444920766157026 0.9325438868175411 F F F  
0.0167663631478447 0.9392178612100679 0.2905399254549508 F F F  
0.8793784579186550 0.8569608727484450 0.7910784954625782 F F F  
0.8815294589038984 0.4447044854141922 0.7901456398496194 F F F  
0.0183487711898636 0.3591129482452118 0.2878275836206257 F F F  
0.3516518703825184 0.8577636245103548 0.9238154740977080 F F F  
0.5285598432277112 0.9462142036385117 0.4014011546609311 F F F  
0.4580653541182045 0.4708816938355724 0.4163036231795871 F F F  
0.4345425386991977 0.3190869219843648 0.8985783132854905 F F F  
0.9628505309268363 0.8177318170992862 0.3068755134749424 F F F  
0.9460726941795627 0.9717595810535755 0.7931668134812284 F F F  
0.9385032224932317 0.3253331464345521 0.8005735860568066 F F F  
0.9675787164758205 0.4815087846445110 0.3132337210468350 F F F  
0.4457484563366876 0.9520724892176418 0.9106404354879771 F F F  
0.4571742003240971 0.8353998172091437 0.4055172146881887 F F F  
0.4778573859242812 0.5092107625111026 0.7445102155280949 F F F  
0.4305062227872938 0.2788962139992393 0.2245356442973332 F F F  
0.9758865227199536 0.7761510020715576 0.9879096291669995 F F F  
0.9195361854414728 0.0241335071789663 0.4901799446817989 F F F  
0.9142422035727193 0.2742893713466259 0.4895752096529051 F F F  
0.9754826265518801 0.5250102457671701 0.9851236149884741 F F F  
0.4158137106314612 0.0369640015058934 0.2014896106432289 F F F  
0.4967468959036836 0.7630194163048074 0.6848793301271456 F F F  
0.4007180314161474 0.4292045479081139 0.6347288360716519 F F F  
0.5106517990259434 0.3570376300983753 0.1168202824470086 F F F  
0.8945250304352044 0.8617097943512988 0.0810800547710357 F F F  
0.0035282432025454 0.9366448191288299 0.5713690426660136 F F F  
0.0036301101415930 0.3596039627363439 0.5676097302645076 F F F  
0.8919746163291009 0.4409797363555299 0.0776012172457143 F F F  
0.4999944224648729 0.9453151350325371 0.1247148909399556 F F F  
0.4032997322160625 0.8523106411718189 0.6244216785952474 F F F  
0.4984622765957170 0.3782910750834105 0.7452408358833225 F F F  
0.4263999482534757 0.4130412803862384 0.2421587087832009 F F F  
0.9882886351888658 0.9081987106196081 0.9582507302841492 F F F  
0.9066777776716251 0.8937310843624431 0.4481961031868238 F F F  
0.9067269450573647 0.4052942891016187 0.4487287820801882 F F F  
0.9876991131956885 0.3922313424800237 0.9586550776459859 F F F  
0.4069994433506849 0.9100088320281543 0.2570616319684262 F F F  
0.4975292646386436 0.8880352531389377 0.7542039552957078 F F F  
0.3172524373170660 0.5303629576870890 0.6879561974710526 F F F  
0.6024221211847376 0.2766659366248447 0.1965806944085955 F F F  
0.8062911217162565 0.7757709864375713 0.0057537238424246 F F F  
0.0940297678176094 0.0226400472081068 0.4977612992341491 F F F  
0.0976098308474960 0.2752308895673679 0.5039943461450207 F F F  
0.7996078808467502 0.5266968991561711 0.0116480032907660 F F F  
0.5933085402150766 0.0226769116862826 0.2057261508585739 F F F  
0.3026122565538643 0.7853370914634041 0.7142314065388504 F F F  
0.2828861393802455 0.4409757943974171 0.5474027120124987 F F F  
0.6351691874539540 0.3643784362399600 0.0547531037191362 F F F  
0.7681883980716080 0.8673021038864235 0.1409815874872606 F F F  
0.1245497340566075 0.9430261214592619 0.6510888494554479 F F F  
0.1231292968945255 0.3589263279342916 0.6533378198864241 F F F  
0.7668108515574374 0.4340383289098355 0.1471324571994899 F F F  
0.6200464591827739 0.9521639518727270 0.0414711178255018 F F F  
0.2825292527538110 0.8548944073795965 0.5481934986012007 F F F  
0.3316653761322073 0.4562408120649195 0.3613095720411295 F F F  
0.5651462122810713 0.3232305934916155 0.8978145579890864 F F F  
0.8334889820529909 0.8365534417158145 0.3052087602599229 F F F  
0.0741674567638810 0.9639768332961580 0.8330539991014945 F F F  
0.0672128514643191 0.3280987875698500 0.8291762305751504 F F F  
0.8380327953832207 0.4640940799439264 0.3027304750913586 F F F  
0.5685098256722156 0.9768949649088228 0.8587723729377004 F F F  
0.3307896551204124 0.8291471370856200 0.3622198095126024 F F F  
0.2474384369714002 0.3573426001407185 0.3992531165120496 F F F  
0.6267135679745621 0.4421514057810043 0.8903250347516334 F F F  
0.7556893417727011 0.9449007191436820 0.3051052101514600 F F F  
0.1439815149017036 0.8521426151480895 0.7978765952675460 F F F  
0.1310392397206286 0.4442794265117413 0.8086667820454281 F F F  
0.7639700819021016 0.3529936878064461 0.3102358954404139 F F F  
0.6242854632380386 0.8582623443721786 0.8961845948568339 F F F

0.2634370171548497 0.9427498906562803 0.4000381957380412 F F F  
0.4079946279251558 0.5448690059172137 0.2705231094323608 F F F  
0.5030280412760391 0.2462774943836479 0.7686794357990578 F F F  
0.8853504388162960 0.7597415664129343 0.4417646957105745 F F F  
0.9981207387289572 0.0428402874359008 0.9407702974948009 F F F  
0.9928310468176775 0.2568899679801220 0.9485409305734365 F F F  
0.8855992994427453 0.5396706715975910 0.4434756148134724 F F F  
0.4701226978629478 0.0214694717939992 0.7460874295318689 F F F  
0.4227749904707068 0.7763874001773701 0.2395479426234957 F F F  
0.705455344581317 0.2331439766870460 0.3079804688445122 F F F  
0.1903780657531797 0.5632202589640940 0.7753570455137577 F F F  
0.1973001191773562 0.0575997445057723 0.3788945489250750 F F F  
0.7030642383244654 0.7519224830861901 0.8820306427485178 F F F  
0.6931572450676100 0.5576369791291711 0.8970316971011556 F F F  
0.2086199304703484 0.2311408383907292 0.4117421606974290 F F F  
0.1927278228467841 0.7273646462881516 0.7818837143688881 F F F  
0.7007662197849527 0.0658751061450928 0.305862756228757 F F F  
0.5884659891568305 0.2445349492548416 0.3929325213035924 F F F  
0.3052715107698489 0.5415807525358929 0.9088934855847413 F F F  
0.0786985895298784 0.0572661096933658 0.3036470994337179 F F F  
0.8232472030633105 0.7361224981017713 0.8142298012227229 F F F  
0.8110743875437834 0.5575649984625386 0.8158790624206489 F F F  
0.0969744810200339 0.2508016180576433 0.3071135912818903 F F F  
0.2979992805838378 0.7391490763318487 0.9030866784475649 F F F  
0.585550940765113 0.0650112847471505 0.3983416495065626 F F F  
0.6075710696857399 0.1514020876160416 0.2499541934424698 F F F  
0.2979114532877674 0.6506867103223470 0.7545514848916639 F F F  
0.1081404150677585 0.1492697118270456 0.4414406728611269 F F F  
0.7794841756654733 0.6513014578849194 0.9530682146470468 F F F  
0.5308144143977600 0.2564250240533497 0.5719946883184974 F F F  
0.3751274467411889 0.53645596833995154 0.0785646037388830 F F F  
0.0166690679851911 0.0242367451637335 0.1353001879074043 F F F  
0.8757168242597260 0.7710942189382521 0.6390466683763165 F F F  
0.8683571542384669 0.5319796961960321 0.6407299720243032 F F F  
0.0246706615165806 0.2684680541460835 0.1411372875121586 F F F  
0.3757341313397404 0.7629429500171341 0.0586358357469692 F F F  
0.5154111082274611 0.0256835070344721 0.5594072497601843 F F F  
0.4561469164678797 0.2395626526129178 0.4114818395108983 F F F  
0.4357137227779759 0.5703833864459611 0.9104299459053848 F F F  
0.9472039333802726 0.0537168825605505 0.2980824479650579 F F F  
0.9538487297921492 0.7453854126292327 0.7944579959049065 F F F  
0.9427083436373707 0.5632135875689741 0.7983243782866296 F F F  
0.9654288195114233 0.2377418287996207 0.3127745068623469 F F F  
0.4296896693526691 0.7540032673598773 0.8764032021031340 F F F  
0.4538563464127350 0.0578650159564518 0.3910958821078907 F F F  
0.4997954895363961 0.1390851115984120 0.6585279456126401 F F F  
0.4049309684695146 0.6547443854251611 0.1655988325540960 F F F  
0.0010032420255826 0.1483874042982691 0.0629275518094587 F F F  
0.8834740714878535 0.6505792133460346 0.5539412175678180 F F F  
0.4074069483089531 0.2350271142742528 0.6301682304223988 F F F  
0.4996511441918372 0.5611306539756811 0.1245263183114957 F F F  
0.8991179187610854 0.0634602997561657 0.0696772571945274 F F F  
0.9891128343662956 0.7319682460200170 0.5561835026573760 F F F  
0.9857524855423705 0.5656018336844113 0.5639897885032568 F F F  
0.9012122708635104 0.2360864639159601 0.0885831303820268 F F F  
0.5034370553526770 0.7333460862161019 0.0947499515055767 F F F  
0.3937024147642560 0.0698753987593150 0.6019374820672496 F F F  
0.2971678213962221 0.1611437918654275 0.6228348565026849 F F F  
0.6036449680093980 0.6461819662143498 0.1178899394686681 F F F  
0.7988409198314201 0.1517362390401118 0.0730096861311651 F F F  
0.0901715094845272 0.6469760925094192 0.5822926865659497 F F F  
0.2978428031185558 0.2824461162289964 0.5435512011761716 F F F  
0.6130039721850480 0.5220410332767784 0.0486703092172149 F F F  
0.7890278504915784 0.0326798842656117 0.1645182603682755 F F F  
0.0931911057289483 0.7685571857229903 0.6650029320558772 F F F  
0.0918419019735097 0.5223012102777957 0.6589273657352095 F F F  
0.7836115495866025 0.2721152207731805 0.1561069906977366 F F F  
0.6263262590875698 0.7683322338015373 0.0424442035239281 F F F  
0.275015859001932 0.0411770716140651 0.5356480686580909 F F F  
0.3309410576288556 0.2579498903577999 0.3524311200764672 F F F  
0.5654710022374303 0.5618251155181255 0.8697793145465909 F F F  
0.8235944958970762 0.0546235415389518 0.3585649914991365 F F F  
0.0758719161130230 0.7453306457506201 0.8630301512299852 F F F  
0.0692702545276802 0.5585523749894250 0.8505913590660086 F F F  
0.8344554934784796 0.2404543747280670 0.3359633022491053 F F F  
0.5738392877843381 0.7352728425245800 0.8634747831459109 F F F  
0.3258989700569046 0.0557407505754881 0.3489984422148424 F F F  
0.4002945180322399 0.1558003435985498 0.2805063031398376 F F F  
0.4875912620261502 0.6428561530668517 0.7634916779219765 F F F  
0.9062253947699759 0.1480935641975734 0.4288198985339164 F F F  
0.9910808408505574 0.6516186979723599 0.9291834930082175 F F F  
0.4391331312425493 0.5881111425649905 0.5812491108844000 T T T  
0.3846433782834708 0.6972298812115909 0.6155640385143855 T T T  
0.5203152232860262 0.6487417711692132 0.3058900997966489 T T T  
0.4799512649913282 0.6983635808402511 0.4853112116432570 T T T  
0.2295027708327666 0.6525443348607496 0.5874480134484514 T T T  
0.5727478416233609 0.6482390553497481 0.6027679009818527 T T T  
0.3808680298925395 0.6827503463954798 0.3832220857021369 T T T  
0.3199923178831128 0.5893220308403002 0.4710451065062031 T T T  
0.6270274806600895 0.4721846784070891 0.3028636015119943 F F F  
0.2748917501203536 0.3361010650023886 0.8009563978771723 F F F  
0.1269430070176369 0.8235719283946352 0.4078655791022356 F F F

0.7743082429143513 0.9733307207949267 0.9003216749616030 F F F  
0.7739922670281771 0.3288077110414349 0.9010537275343680 F F F  
0.1265851420145552 0.4749634706451573 0.4062740783448788 F F F  
0.2804513136917564 0.9801242266004095 0.7885407126455206 F F F  
0.6237477795272994 0.8250090168447812 0.2851559179813705 F F F  
0.5245866325172557 0.4355124334822023 0.4613873078102557 F F F  
0.3796042573781193 0.3653616804976494 0.9555830867338386 F F F  
0.0232451662882696 0.8602651308666651 0.2559549608101008 F F F  
0.8792689641659592 0.9351806242212675 0.7517550463877001 F F F  
0.8767277145332955 0.3664613972247253 0.7518917596038719 F F F  
0.0248232968021682 0.4383766511741101 0.2551268454213300 F F F  
0.3718563662904018 0.9345611139576064 0.9511441804475638 F F F  
0.5260187973613952 0.8688546332811455 0.4428711860023640 F F F  
0.4759666167546825 0.4418246645366963 0.6769705394348122 F F F  
0.4367182248317150 0.3503205468696819 0.1656190044757366 F F F  
0.9699156057128633 0.8502454461189615 0.0396033193875880 F F F  
0.9273534575124387 0.9480609821914641 0.5340565273448590 F F F  
0.9266329877493931 0.3498850370623785 0.5332595092199952 F F F  
0.9680228199128464 0.4513114409824297 0.0379385996856598 F F F  
0.4244985674375528 0.9594313624884094 0.1632434540276577 F F F  
0.4804992614232546 0.8414111763011931 0.6564531286472786 F F F  
0.3238737899525930 0.4510951435634567 0.6510440104186941 F F F  
0.5879603399486371 0.3513944586219893 0.1518023296717317 F F F  
0.8173048666288310 0.8522869329043203 0.0468607338194005 F F F  
0.0819011948466510 0.9487242880850957 0.5480743273569715 F F F  
0.0828050881456832 0.3502530326859983 0.5487251202222581 F F F  
0.8134705279551113 0.4499031577660375 0.0501605001823009 F F F  
0.5790443625588395 0.9522994514723777 0.1467568733697533 F F F  
0.3249198274292056 0.8521165290654267 0.6522181692805020 F F F  
0.2686737892904887 0.4342405193974557 0.4275760250628906 F F F  
0.6301767902164173 0.3646327220523773 0.9321105668997589 F F F  
0.7654475824557494 0.8683253608538237 0.2633613310996381 F F F  
0.1354589198895013 0.9320286382375187 0.7714014050157800 F F F  
0.1288214706880026 0.3653852371318038 0.7753393335386534 F F F  
0.7686054576308621 0.4304729071638533 0.2697750710551574 F F F  
0.6268352857387995 0.9383868429638795 0.9205269591598082 F F F  
0.2718479374803735 0.8630566495459817 0.4273673747392692 F F F  
0.4061833995778983 0.4707833911361945 0.3230398685766787 F F F  
0.4999893320727082 0.3179516905769049 0.8276907823257389 F F F  
0.8973766076109797 0.8279844333941639 0.3765650238154450 F F F  
0.0015038283680653 0.9708841702423783 0.8820199843623371 F F F  
0.9964360599020381 0.3269536987506143 0.8854674117383183 F F F  
0.8999056278599724 0.4718329693469556 0.3783361281538831 F F F  
0.4954368670592331 0.9591762074305166 0.8154991578437318 F F F  
0.4038043350382665 0.8377222212522426 0.3144068994546743 F F F  
0.6260202742659828 0.2273721725175619 0.2873443103587547 F F F  
0.1201264036451661 0.0712881035687261 0.4067433195112926 F F F  
0.7771411851768448 0.7292021327753844 0.91456870966321922 F F F  
0.7706938980478810 0.5728668703801532 0.9198739380673899 F F F  
0.1279963243899473 0.2270274926412768 0.4157001341254514 F F F  
0.2736340344229404 0.7267977890889341 0.7875433909162908 F F F  
0.6218612491632456 0.0750889445331779 0.2892587086449936 F F F  
0.5244749952949235 0.2742006526623584 0.4523868107471429 F F F  
0.3760456907829877 0.5232941957524488 0.9567982376780648 F F F  
0.0149878114473125 0.0184199097471165 0.2575252522030951 F F F  
0.8827620574556008 0.7775575352945339 0.7607153559891415 F F F  
0.8755226164119989 0.5244080724969464 0.7623811077057425 F F F  
0.0267887017424684 0.2790028250183525 0.2627464055964879 F F F  
0.3662119856128854 0.7775474441307324 0.9387270077033136 F F F  
0.5205370504304199 0.0242126034535843 0.4372220776403211 F F F  
0.4846532805082475 0.2193462246202884 0.6567150140958873 F F F  
0.4235889798412558 0.5745927630763461 0.1586210177597422 F F F  
0.9782174490512361 0.0703153500497322 0.0518765675125152 F F F  
0.9090036319223032 0.7279175267455784 0.5481114013259614 F F F  
0.9061482437354229 0.5722360663229438 0.5508267332715562 F F F  
0.9792859644077652 0.2271571898622184 0.0602898674856576 F F F  
0.4278857645411520 0.7316377810678176 0.1379962539632373 F F F  
0.4695371255853189 0.0642458234223824 0.6422912519562587 F F F  
0.3272621027847862 0.2368817815927073 0.6356677423341637 F F F  
0.5794207555828663 0.5688102103180270 0.1366100029670463 F F F  
0.8194729172592972 0.0725626149533056 0.0680308913654315 F F F  
0.0683360004036899 0.7261102778507578 0.5675801913740628 F F F  
0.0653758674032545 0.5687697495321729 0.5669433050449086 F F F  
0.8218898360715272 0.2302439973623365 0.0682841807174057 F F F  
0.5820458386231948 0.7250296968644747 0.1210869537466337 F F F  
0.3151966745884991 0.0810201440459082 0.6235352916595005 F F F  
0.2716892436520837 0.2810690794326121 0.4270996745144799 F F F  
0.6240968051826385 0.5207785565125889 0.9270549288792580 F F F  
0.7680850035138675 0.0247075439609787 0.2824813868012086 F F F  
0.1262995070156947 0.7734731604399840 0.7771909320535855 F F F  
0.1218501944923958 0.5226631503898034 0.7743260058344461 F F F  
0.7721338079681743 0.2742740092178977 0.2778973970084593 F F F  
0.6302440471319173 0.7777561780744406 0.9193264351731116 F F F  
0.2664968591927277 0.0240310350727526 0.4161153827319595 F F F  
0.4042811568512477 0.2333750309251599 0.3178299604790311 F F F  
0.4916065043826165 0.5701939042863842 0.8220454752774060 F F F  
0.8989995881338757 0.0699883463620807 0.3936992573594793 F F F  
0.9993593135169903 0.7296578990162388 0.8937389393785224 F F F  
0.9950502590426638 0.5736802965916254 0.8910000613132922 F F F  
0.9046864063929547 0.2260925289647986 0.3915047017862463 F F F  
0.3986118449896097 0.0759595766305949 0.3062098023236715 F F F

Structure 2xH2O/15 S=8/2  
1.0000000000000000  
20.1473052208877697 0.0000000000000000 0.0000000000000000  
0.0000000000000000 19.7681594983396742 0.0000000000000000  
0.0000000000000000 0.0000000000000000 13.2309279702280254  
Al Fe H O Si  
2 2 10 200 94  
Direct  
0.2746585727656525 0.5678511156407243 0.7951769027683442  
0.4972094416706055 0.7276791809769019 0.8095160534869430  
0.3300167747303976 0.6177968972628805 0.6059810378381678  
0.4665384030971597 0.6659611700651674 0.6058272920624092  
0.5497204954194754 0.6873701451749995 0.3124727583129384  
0.3909624644053246 0.6769057075051800 0.3150789869787359  
0.4372393975900570 0.6966395914643888 0.4422096259954142  
0.5076694638818904 0.6366587667808421 0.3733841326645423  
0.1986678404134141 0.6413819886529153 0.6441304361140009  
0.2027028436886353 0.6491920739720103 0.5263416098458260  
0.5941151389123376 0.6571287463024411 0.6694261909091533  
0.5907729023065356 0.6843053102528716 0.5581386793542354  
0.2765860519664762 0.5717534339439049 0.4466487883755321  
0.3549927209045205 0.6437964573040560 0.4100048341362509  
0.7071909172585769 0.4721412935808199 0.3188945829284365  
0.1954218272978538 0.3270177745746599 0.8129463391789410  
0.2065558531104719 0.8206853624075717 0.3943846593105054  
0.6958042800428754 0.9697512577282205 0.8786088313034723  
0.6941855912366054 0.3254351502044695 0.8863877563704641  
0.2070605476554014 0.4844760414417674 0.3996370579810072  
0.2017881247038779 0.9708611095399462 0.8074275036379653  
0.7038602161148982 0.8221764107502429 0.3008465913312331  
0.5908955312685812 0.4694723340620552 0.4127126183732032  
0.3068714042510191 0.3428235133930816 0.9133507547259155  
0.0930517000991591 0.8286696678804253 0.2964767225800223  
0.8141025053404948 0.9747112110994809 0.7931212194563071  
0.8072488141789089 0.3329202079359475 0.7892111770135034  
0.0966842707688252 0.4675069084997000 0.2921420085362140  
0.3171740933231407 0.9834479448133645 0.8981432518872768  
0.5904705850371569 0.8294071552171487 0.3968717389304443  
0.6065905837834903 0.5407817223526359 0.2439393491272086  
0.3052573097807936 0.2708483432384646 0.7422382873779522  
0.1035933894540296 0.7546130000823005 0.4654151529244924  
0.7899744726889919 0.0414047603583237 0.9641788715292228  
0.8019835088566708 0.2623229130552775 0.9592435518932879  
0.0967485847570445 0.5422295456815466 0.4603699651159518  
0.2935084470699119 0.0519757685121587 0.7330418149189845  
0.5979160248183018 0.7546325190163692 0.2347736373739042  
0.6044313112087381 0.4061245397591509 0.2390343652922515  
0.2897063156346928 0.4058705608689121 0.7389981033615013  
0.1069212566806950 0.8899764033369220 0.4724437811504861  
0.7992720987793728 0.9064476638187773 0.9601907528404945  
0.7932897967596825 0.3973154002578533 0.9619417896474978  
0.1083400908793699 0.4076469110090351 0.4704235334993483  
0.3100148417893892 0.9192667986403220 0.7190961232181753  
0.6035356867264708 0.8886912302880705 0.2148160351171751  
0.5269331777607569 0.4472551325146876 0.5822496348742283  
0.3813951082241993 0.3523564860396227 0.0764904735204662  
0.0214901005344146 0.8539772641998030 0.1339882318906037  
0.8779985262979709 0.9382554072217825 0.6294351411871727  
0.8788558843267821 0.3615747440050625 0.6299902531467984  
0.0182237770947656 0.4473950603082779 0.1338063046996492  
0.3724049720431356 0.9458495639176502 0.0724063901192913  
0.5291813426614353 0.8647370989782149 0.5647191860110687  
0.5210776178027532 0.3554068203099315 0.4340400285261058  
0.3955718271680413 0.4442793010643674 0.9313851957111277  
0.0166083041453493 0.9392778332225865 0.2904772814279524  
0.8792766089261268 0.8569657568010830 0.7909680975219311  
0.8815314859560147 0.4447205508855641 0.7899933457845691  
0.0180946887788786 0.3591003427326815 0.2875431888083212  
0.3519889895137345 0.8579531272493817 0.9228142354737400  
0.5282391553756027 0.9460677356719859 0.4015321235394801  
0.4580651939502176 0.4712815475753439 0.4161547553858746  
0.4344919249065340 0.3187648455347743 0.8985707892151017  
0.9631989216897806 0.8176506400442582 0.3070676720653303  
0.9463824592234765 0.9715200143326402 0.7928050296291844  
0.9383768615794446 0.3252784200799022 0.8004866193480377  
0.9676741212509667 0.4816205883457194 0.3131965798207940  
0.4458823071469444 0.9524917709828525 0.9106529146987529  
0.4576781089461721 0.8347078033121625 0.4051326456315081  
0.4780564489576603 0.5091413694424802 0.7442161387453299  
0.4300872948122846 0.2790405036866515 0.2244102525373661  
0.9761521124586126 0.7760875592306554 0.9879220515305800  
0.9196186357800844 0.0241488840297565 0.4901327456358481  
0.9142602122970002 0.2744703999430105 0.4892977057384862  
0.9756807334944382 0.5249809264994870 0.9847556197005439  
0.4158316381953638 0.0365779893419389 0.201707090551876  
0.4971301182482849 0.7632737733660210 0.6861482242879829  
0.4007358222481986 0.4291143842636828 0.6347765547178290  
0.5106581609545205 0.3570002413187262 0.1170449231385876  
0.8947621652552104 0.8615521485768219 0.0812342959250318  
0.0035461612101568 0.9366002930417596 0.5712382456373345  
0.0035736117077440 0.3596611478204831 0.5678138262613097  
0.8919045582832839 0.4413080369757033 0.0775030302601308

0.5003710553003025 0.9456322775800424 0.1240887074425690  
0.4034364051874030 0.8518816079259486 0.6243312482650535  
0.4984587660078364 0.3782402938093406 0.7454594736751844  
0.4264720435131852 0.4132472474827559 0.2422302541290473  
0.9883504639931935 0.9081150810792404 0.9581691641251471  
0.9066853049514227 0.8937484347701593 0.4480599316000743  
0.9068245104894240 0.4055422117323102 0.4488325807299156  
0.9874436923259194 0.3921609571742946 0.9586686310338726  
0.4079895498441927 0.9093466173631020 0.2565554805054644  
0.4974274491022914 0.8886260945021773 0.7539309260159475  
0.3174409832262026 0.5303219110478223 0.6880224261218829  
0.6024475901749774 0.2766523182063849 0.1966961757153281  
0.8065113251990971 0.7757468870062355 0.0057621443451476  
0.0940235538457166 0.0226973605862418 0.4976855748615429  
0.0974271531235714 0.2751838287094675 0.5041096776029829  
0.7993672808127601 0.5267811346503433 0.0115610919247842  
0.5936005990609775 0.0226433320388835 0.2059161888800037  
0.3028399215778592 0.7850147983018299 0.7136134192276454  
0.2828165416234729 0.4405303890102511 0.5475569088272444  
0.6351371067959297 0.3643266848603287 0.0548000521349779  
0.7683718378616098 0.8674553922567618 0.1408150269546353  
0.1244343809601184 0.9432707642701175 0.6512356036805462  
0.1231777094188068 0.3590087297747563 0.6532215418936431  
0.7667603927737551 0.4340741531213798 0.1471030682909886  
0.6205493218871916 0.9522998861502292 0.0415112365498982  
0.2825483317485438 0.8554586449238769 0.5484382620971747  
0.3317217543384941 0.4560858544643756 0.3614007975030363  
0.5650876620674504 0.3230723469976274 0.8979387947685139  
0.8338397846579479 0.8365448285649230 0.3047613166408175  
0.0743903599351431 0.9641025313830643 0.8334731492150584  
0.0671048883442834 0.3284767442746558 0.8290237090407856  
0.8381507807079088 0.4640574352471428 0.3024972424058054  
0.5687177898585964 0.9770765276076417 0.8589092009606838  
0.3309561828377120 0.8302620976734038 0.3624601093775777  
0.2475220196213729 0.3570952351242598 0.3990397435428067  
0.6263445151556313 0.4421638100982090 0.8904818242130210  
0.7560393617731663 0.9449267177384894 0.3051445380783428  
0.1438400235416455 0.8521157174306241 0.7976599288431457  
0.1313336311287514 0.4444793633307951 0.8083356219174078  
0.7641118787247742 0.3529879127098972 0.3102040131734519  
0.6235850585114349 0.8581232927643335 0.8964718701580796  
0.2627133075977827 0.9430876529078761 0.4001901560201572  
0.4077235005640784 0.5451691710976129 0.2702864875794505  
0.5030891732204570 0.2462096826369952 0.7684627898525422  
0.8854247076136779 0.7597651854445603 0.4416813994438027  
0.9978468220362628 0.0427814811282463 0.9406921267777094  
0.9929963100823157 0.2568609832325661 0.9483077912888122  
0.8854615547936030 0.5398316086650865 0.4431801256413491  
0.4704551070233012 0.0221883146464801 0.7465401305163097  
0.4220478103552014 0.7754660166451002 0.2399604602761931  
0.7055124970891085 0.2331803982739213 0.3080398540840968  
0.1904839687231321 0.5634638925770932 0.7743625178353470  
0.1973283014714419 0.0582974563368462 0.3791365327084177  
0.7032270230587652 0.7524721241460139 0.8820828496662112  
0.6931777109222155 0.5574455201598917 0.8963043612558674  
0.2084209291639525 0.2309820489637026 0.4119330700508516  
0.1928715061181219 0.7274505637157214 0.7819947148082405  
0.7007766831205349 0.0657802924767633 0.3066790021815755  
0.5885110871029743 0.2446758115336315 0.3930278618902883  
0.3051543649785004 0.5414643665849976 0.9090127055649203  
0.0788555130258092 0.0571477674107437 0.3034653246364583  
0.8233022470469903 0.7360479072540600 0.8142014679471988  
0.8113272431435351 0.5577339482280588 0.8158820985004980  
0.0969555241722266 0.2509939545711978 0.3071043774520908  
0.2981892231340136 0.7392769708984334 0.9029539052607846  
0.5854155600113908 0.0648575015980633 0.3985759328948678  
0.6076636395420913 0.1513511305951935 0.2503420284991457  
0.2979087219779412 0.6506649375596951 0.7544151656870116  
0.1076428167725434 0.1493537557220014 0.4413425671874941  
0.7791612364298930 0.6513606601985298 0.9529007661847231  
0.5306104214561435 0.2570117115022159 0.5717813879811268  
0.3753543368343259 0.5354256308523033 0.0784399073935038  
0.0165762847119317 0.0242741549749921 0.1352287067999843  
0.8756891570238536 0.7710980554813730 0.6389863902421506  
0.8683404581124564 0.5319748368744814 0.6405458855652045  
0.0246996954505251 0.2683450220854446 0.1409837869064630  
0.3757748131347321 0.7640014256720197 0.0588126031643215  
0.5152790979824949 0.0254269465566446 0.5595793397960119  
0.4561607425010700 0.2394889580495960 0.4111225149561789  
0.4355083957822136 0.5702699821181231 0.9100774607743721  
0.9473570454012858 0.0539878221921971 0.2981441392427389  
0.9538703524979318 0.7454887921773958 0.7944181822333349  
0.9429484553542652 0.5631041053402078 0.7978945963812267  
0.9654538784079508 0.2376214511558985 0.3126325532375784  
0.4298193248801391 0.7536363940370558 0.8769884266912085  
0.4537520636461818 0.0578736441097456 0.3913052262321964  
0.5000254125210195 0.1393322917547423 0.6574734439733675  
0.4049384455072528 0.6544703717818345 0.1619900392178402  
0.0006565278744334 0.1483420658385288 0.0627271881516591  
0.8834657625513971 0.6506184241124839 0.5539127179393167  
0.4073404671237178 0.2350987770170967 0.6301559474725175  
0.4997062258008387 0.5603066467239712 0.1245638721618273

0.8988957987460674 0.0631869249888065 0.0697100867182308  
0.9891179182823326 0.7319578305486962 0.5563048218046317  
0.9856745587473713 0.5654845763085229 0.5635820165363782  
0.9011781982400632 0.2363922689725157 0.0882155860093040  
0.5035583954049306 0.7344526890994069 0.0948712692142987  
0.3937379307777512 0.0699622735070294 0.6022445265658125  
0.2971237899379466 0.1611292620372290 0.6231199350911432  
0.6031225085656824 0.6463119178217802 0.1178620021724296  
0.7989275045165378 0.1518251754543654 0.0727555564912778  
0.0901232262793578 0.6468791939398224 0.5815779512817387  
0.2977289123437569 0.2823365316112477 0.5435376495861850  
0.6134072322308544 0.5223294654806621 0.0487538797430052  
0.7886904588265801 0.0329813595781084 0.1646282782901337  
0.0934203878402478 0.7683344303418590 0.6647353752419388  
0.0918200238967965 0.5223281043319202 0.6585323797012456  
0.7835666265458421 0.2721339765329733 0.1560038046205965  
0.6267508651654934 0.7683213405000112 0.0429969500017407  
0.2750842136338034 0.0412752473103758 0.5357548773671585  
0.3307855511093949 0.2573747234950459 0.3525256392632194  
0.5653858807488276 0.5618989544964869 0.8700664330949340  
0.8237265716686036 0.0547702339647165 0.3585309914319642  
0.0759417987986066 0.7451635627964820 0.8627519824543070  
0.0694823113526058 0.5587127040518186 0.8502629759083798  
0.8345153417860695 0.2403728437647551 0.3357599972821173  
0.5741325029897347 0.7346333136261390 0.8644261823195408  
0.3258646219741167 0.055793335765834 0.3490097589836219  
0.4004727214448756 0.1556508039471738 0.2800735195675438  
0.4876426546495554 0.6427566581143858 0.7634258922921096  
0.9062675302049318 0.1481817447078746 0.4290734342248689  
0.9910739772046007 0.6515839372044480 0.9289110559060866  
0.4419809653981245 0.5873631426127767 0.5802481275694539  
0.3856700326755955 0.6954030800434917 0.6163011706650747  
0.5198595154217065 0.6487883544635801 0.3043204807812874  
0.4817200991423748 0.6996580939569040 0.4869142729215828  
0.2289107601794762 0.6519509456746360 0.5880758837146937  
0.5742855148269782 0.6488887849442099 0.6031232491232623  
0.3780925011897908 0.6858861399899694 0.3850116661022039  
0.3192982315682185 0.5868179238232168 0.4732245637949831  
0.6271291070674315 0.4722675645604380 0.3028667326653947  
0.2748381634906401 0.3360925882116554 0.8010386572449592  
0.1270909569118792 0.8236992280114883 0.4078518290819938  
0.7744606618877679 0.9732305129905071 0.9002808207629774  
0.7738919986291432 0.3289270293422800 0.9009561879158603  
0.1266040789995000 0.4747566885677644 0.4060640745695460  
0.2806025639947546 0.9800413856679125 0.7887474508079606  
0.6240406135346289 0.8250976777649236 0.2852579997291388  
0.5244776549291023 0.4355894712434028 0.4610202842334084  
0.3796127238897972 0.3652441208057338 0.9553691940829704  
0.0234274235584009 0.8603422907614173 0.2559460894558114  
0.8793823526635342 0.9351800766967869 0.7516349137542478  
0.8766396777359573 0.3664724831723452 0.7517743762177445  
0.0247868774368614 0.4383686081949393 0.2549644864790855  
0.3720439715240688 0.9346742469460689 0.9510466071173350  
0.5261802001596879 0.8686522734660291 0.4428924240570187  
0.4760369874461151 0.4416146091867948 0.6768697554111828  
0.4366591802550556 0.3505231242747447 0.1656925242464510  
0.9701258968149584 0.8501794547466138 0.0396214989589122  
0.9273810460553814 0.9480548212640864 0.5339404380731757  
0.9266097432650555 0.3499991458752622 0.5332126080986559  
0.9679643011868448 0.4513871464710157 0.0377995736677058  
0.4248634075885640 0.9591605313615056 0.1630774727038957  
0.4806491759157208 0.8414438255919974 0.6567054082896786  
0.3238899431365678 0.4509517633270132 0.6510464944917826  
0.5879751161014791 0.3513930370277446 0.1519342120863641  
0.8175649818848675 0.8522745292109493 0.0468542338763910  
0.0819166744594599 0.9488016488359383 0.5480750713894048  
0.0827192160753786 0.3502306083931205 0.5487506466906018  
0.8133687801865004 0.4500216392700785 0.0501067174421048  
0.5793620557839479 0.9523616802153203 0.1466701749169644  
0.3250807973476163 0.8521396156889250 0.6522408567687105  
0.2687697875566956 0.4339334369174518 0.4275975110064217  
0.6300408816296944 0.3646335646352260 0.9321849074412196  
0.7657380572745375 0.8683903672618238 0.2632107648336929  
0.1354794879403175 0.9320574659807298 0.7714579191555376  
0.1288372652232656 0.3655308231309936 0.7752191812328643  
0.7686588496905763 0.4304723328226573 0.2697489023095370  
0.6269017533190752 0.9382801373087363 0.9205655745280622  
0.2717934115513284 0.8634565376312977 0.4275710063569093  
0.4061247008830997 0.4711242138960129 0.3228850801745542  
0.4999747297278043 0.3177822985160182 0.8277379776352811  
0.8975763148325360 0.8279727300120135 0.3764333155631622  
0.0015777120530348 0.9708285673636944 0.8819950837575138  
0.9963403119639265 0.3269855338127433 0.8853463284271945  
0.8999439638913042 0.4719539702069942 0.3781985253711825  
0.4955938884384886 0.9596240390286290 0.8155643823905071  
0.4039790020088097 0.8372822817086527 0.3144402280841008  
0.6260724325612108 0.2273828860660162 0.2874854267249922  
0.1200391975279054 0.0714240592339554 0.4067145946083592  
0.7771868855631465 0.7293081332432707 0.9145573610346944  
0.7706311580510979 0.5729119594355209 0.9196273660869312  
0.1277886275150874 0.2270390392908653 0.4157313101745010  
0.2737509173236007 0.726866856579263 0.7874953893456754



0.6219065951860997 0.0750227463529874 0.2896758870594341  
0.5243572948126931 0.2743916012741177 0.4520303245047751  
0.3760052384352386 0.5229509784363303 0.9566306533730783  
0.0150037724019200 0.0184792154862616 0.2574621727938761  
0.8827521608364315 0.7775709515298430 0.7606495885096366  
0.8756313425517669 0.5244233941868600 0.7621890133886273  
0.0267341616750694 0.2789887692610470 0.2625830123808099  
0.3663206908872011 0.7777913386165993 0.9387927586527844  
0.5203757231340009 0.0240555797899936 0.4373706209502076  
0.4846568557516699 0.2195435430890767 0.6563645343360813  
0.4235757288695632 0.5744094243868721 0.1581383850632363  
0.9779785740776378 0.0702369711779449 0.0518187122618277  
0.9090197581607483 0.7279513801625985 0.5480639956358220  
0.9060576119227705 0.5722667764798973 0.5505990650255576  
0.9792406414600289 0.2271850028788539 0.0600512653942035  
0.4278511821864139 0.7316715925028888 0.1375509705498548  
0.4696424609650610 0.0644394205002952 0.6422816815940185  
0.3271989330476308 0.2368694292279380 0.6357054058624807  
0.5793721513251415 0.56888247741193488 0.1367212113019693  
0.8192760046534948 0.0725822473452607 0.0680058694590887  
0.0683689203206701 0.7260850226497814 0.5672460478636348  
0.0652725057257094 0.5686854888663663 0.5664499485771493  
0.8218492791853282 0.2303558780837677 0.0680864050593541  
0.5820162811847336 0.7252793283170064 0.1214997860015192  
0.3152214755526247 0.0810289135028993 0.6237304607323274  
0.2716013825195207 0.2807854641003121 0.4270844594052527  
0.6241363387906617 0.5208172573428922 0.9271277420446026  
0.7681141836765168 0.0247993120412405 0.2826956115566818  
0.1263560030950942 0.7734150704519834 0.7769961274644089  
0.1219359834923950 0.5227941370359097 0.7738426073759934  
0.7721839274188905 0.2742719416806151 0.2778181316778530  
0.6303260138875271 0.7777174275899315 0.9199070014857446  
0.2663687163564044 0.0243167236341292 0.4162019548221487  
0.4041978147983468 0.2332184877713690 0.3175856508286386  
0.4916241658609858 0.5699166995866448 0.8221161957498732  
0.8991053468661100 0.0701015325216409 0.3937569241238055  
0.9994298513460860 0.7296431355261843 0.8935963675334474  
0.9951988319214290 0.5736819113489261 0.8906602128042374  
0.9047189022471888 0.2261064504539018 0.3914231573223035  
0.3986183311252845 0.0758402231229966 0.3061717531484959

Structure 15 S=8/2

1.0000000000000000  
20.1473052208877697 0.0000000000000000 0.0000000000000000  
0.0000000000000000 19.7681594983396742 0.0000000000000000  
0.0000000000000000 0.0000000000000000 13.2309279702280254

Al Fe H O Si

2 2 6 198 94

Direct

0.2758178803249996 0.5688648057327174 0.7904768017873200  
0.4962542158057483 0.7277169607920152 0.8098915326608406  
0.3295835736241065 0.6198865458779468 0.5970607472370226  
0.4693308186858094 0.6651742414418441 0.6046005894968852  
0.4531037287632442 0.6972953467806423 0.4368668574385549  
0.1995459182212195 0.6423685156057513 0.6404725492569444  
0.2028833606191583 0.6464205539351924 0.5221109633808417  
0.5971938093830248 0.6655515672327021 0.6671518864248194  
0.5911255728818774 0.6761188696208330 0.5493764575442110  
0.2884699222812553 0.5798667181090195 0.4244244954666406  
0.7060615800074284 0.4740451385401339 0.3158756735472047  
0.1957340120625031 0.3277148005326531 0.8119425620678113  
0.2064477534398282 0.8216620952970384 0.3949494832291375  
0.6952859908336008 0.9690668118592379 0.8805483468391357  
0.6942449988699302 0.3260642566136044 0.8864616511440937  
0.2065489885455970 0.4840438104524251 0.3978219793719252  
0.2013484139433275 0.9715128690890370 0.8075124023789951  
0.7046190588316656 0.8213252655486313 0.3019488178264792  
0.5911525084118909 0.4690221035114622 0.4135862889181367  
0.3070089601016143 0.3429935016327637 0.9122631916636929  
0.0932594943242579 0.8289442197063032 0.2964166658941405  
0.8131584014340681 0.9743421019181252 0.7933239489633103  
0.8074778318274285 0.3327338332075241 0.7892582042672537  
0.0958245656909014 0.4678193598674251 0.2920387240871918  
0.3162912235114809 0.9831448079597933 0.9002170312229163  
0.5926307860234629 0.8319424283958949 0.4003524845154004  
0.6026217752255267 0.5426312870173698 0.2465843852900316  
0.3054594000529546 0.2722509042328773 0.7404740924131928  
0.1034601821963844 0.7549038799025228 0.4653434883414302  
0.7897501321855318 0.0415498665311727 0.9641191883799410  
0.8015992234941867 0.2621953489986416 0.9593497795979408  
0.0968105997932514 0.5422177009681241 0.4603400455733747  
0.2937392286413998 0.0526309423662934 0.7348268822245736  
0.5972412310486815 0.7550754140801537 0.2386354087970897  
0.6030987071604071 0.4080511560551487 0.2374366625703774  
0.2898906164359762 0.4076256244993031 0.7387761046823437  
0.1062773796595186 0.8903242980037074 0.4724576907142682  
0.7996435227543187 0.9065971905968698 0.9609680006445136  
0.7937988724940657 0.3972800027672755 0.9616908937875286  
0.1083247747168199 0.4074726070828281 0.4698550006764368  
0.3104974728219728 0.9200849078108901 0.7212154230864763  
0.6048441882566125 0.8889785458099231 0.2173219679951049

0.5271690987959718 0.4459591974146070 0.5827074461575633  
0.3809338207454511 0.3533406522821247 0.0759635420108829  
0.0216263979903683 0.8541346584791795 0.1341069767377570  
0.8774927240728009 0.9386732714192408 0.6297478052544002  
0.8788980219282225 0.3616677036809555 0.6299599652136699  
0.0183135292086382 0.4469977108921442 0.1335095832897307  
0.3718148473492817 0.9452818734063773 0.0735385493766968  
0.5286450237570792 0.8658027858878891 0.5661695242543364  
0.5216763581254887 0.3547851940040452 0.4336198924398823  
0.3963634016850033 0.4434387481242445 0.9277561692802514  
0.0166526820213401 0.9394699198486121 0.2905743604416356  
0.8792508293917167 0.8570695327283256 0.7909685855057931  
0.8816798681542071 0.4446558759444653 0.7900444409683065  
0.0178985101485223 0.3589902140826945 0.2877897291489041  
0.3525129529606875 0.8574348419049533 0.9235170998797617  
0.5258694380016463 0.9463551918263250 0.4018515058276228  
0.4582244203892059 0.4703686028922587 0.4165360240304795  
0.4346889932497652 0.3173221705733676 0.8997648589222890  
0.9634999640386603 0.8178142880534415 0.3075288850956225  
0.9455144331452906 0.9720029135285136 0.7935723596019745  
0.9386812091072217 0.3251928841927190 0.8000990470401500  
0.9665958736130714 0.4812319348410228 0.3120982076800622  
0.4453036088095900 0.9531983495540857 0.9120557614065830  
0.4598534109662136 0.8325870218542969 0.4047746248760565  
0.4783957848457603 0.5092282886564861 0.7434593459705769  
0.4298820269017644 0.2776528096980591 0.2217687088254228  
0.9766012510128737 0.7762005309975023 0.9879782148609193  
0.9192113630491497 0.0243939802076903 0.4902424055073353  
0.9145746668670919 0.2741751426611546 0.4898642513556360  
0.9763704899626365 0.5250045340861133 0.9845462658307118  
0.4153945599994106 0.0324791659724536 0.2068464081562585  
0.4954174641872836 0.7636237808091707 0.6866795520510639  
0.4005652995496946 0.4295930944658219 0.6336229111309400  
0.5099967002203937 0.3573230126761410 0.1169200318253667  
0.8949117147242721 0.8613270117570023 0.0818209077221435  
0.0030882917341938 0.9368670388242496 0.5722828510220559  
0.0035952660132108 0.3597332675888296 0.5674700449404978  
0.8921382051640541 0.4416095698283825 0.0774311294576571  
0.4997517129898907 0.9427537588177175 0.1273547936692509  
0.4027062814530416 0.8531506434860094 0.6227214476934922  
0.4970243025766127 0.3781766207099510 0.7462858221974811  
0.4250244945559906 0.4110804898178526 0.2445949742393427  
0.9881049056121242 0.9082886995145814 0.9583961725897934  
0.9067843519613374 0.8939056440685195 0.4485413105895810  
0.9065237708847228 0.4051325110735232 0.4484776307751989  
0.9873362553236886 0.3922128094899358 0.9582456655381744  
0.4056204004943964 0.9027498321174710 0.2543325522061296  
0.4956195680313735 0.8882366027127658 0.7555603731782200  
0.3176371077788112 0.5320144747494397 0.6819713741147843  
0.6020702811202638 0.2776779649082189 0.1981889331709503  
0.8067111720174474 0.7757564137685417 0.0061876348171617  
0.0930515259663301 0.0229627288030209 0.4982927724777148  
0.0977032021057486 0.2751151962534641 0.5041504781366253  
0.7995205764448541 0.5267815484914647 0.0112918823260844  
0.5920492441635304 0.0226958681825314 0.2057056020615222  
0.3051142769116431 0.7855194486316291 0.7163542955437183  
0.2821046877382033 0.4399964176753052 0.5466184520118444  
0.6346501516395756 0.3643876258044375 0.0548962132988057  
0.7683118916172890 0.8671881754297084 0.1412603780009750  
0.1244044972516271 0.9432563640640127 0.6511753977206548  
0.1230082310307814 0.3594294469354068 0.6529788977100114  
0.7668176135576206 0.4341598358088750 0.1464374447950394  
0.6192343577654464 0.9515401497334730 0.0425832198637637  
0.2795160482601119 0.8559205445208234 0.5530027171150130  
0.3314972477937154 0.4589346880151292 0.3624279308160213  
0.5651806783704175 0.3234035703237735 0.8974316632331557  
0.8343157945590066 0.8369151461684128 0.3048139573603503  
0.0737781085769121 0.9639973104290591 0.8328724598109652  
0.0674585033598927 0.3288359486620965 0.8291024279939661  
0.8369448642519890 0.4639107149442708 0.3034859776230343  
0.5683615399834625 0.9761911002751150 0.8594063671388706  
0.3321639261803911 0.8265272356188830 0.3729274890630723  
0.2491413296240070 0.3571864227833614 0.3964609618923942  
0.6261185835239941 0.4426554734561264 0.8910360714351498  
0.7557015990227740 0.9447176572913072 0.3052055853879281  
0.1439648120134814 0.8524032500764969 0.7979607560366326  
0.1316443660945590 0.4450031511050899 0.8081742944229252  
0.7615770792769049 0.3536030201453104 0.3095460450461182  
0.6230495891466817 0.8572852497658763 0.8978512341354512  
0.2660712084242898 0.9424820451690127 0.4011909479268246  
0.4091204875951385 0.5438525422517734 0.2683704103277052  
0.5033956581275715 0.2461821386618816 0.7682112869912894  
0.8857576730757593 0.7599426116410862 0.4420071182108251  
0.9980868792330172 0.0429070763888851 0.9408474941919495  
0.9932474557399406 0.2569746854218394 0.9481709638674883  
0.8853914607013994 0.5395801963235122 0.4432921262841216  
0.4702864489681883 0.0219763381553431 0.7472673387349030  
0.4163943893959128 0.7661495025231209 0.2510745874174736  
0.705522806478324 0.2326582779732678 0.3071805067263864  
0.1912460847015371 0.5638920681491010 0.7726136896702576  
0.1969524380428554 0.0558221486212238 0.3800492327376687  
0.7023640677919988 0.7515682120167747 0.8851004230392524

0.6936265297321278 0.5577528167895430 0.8955963098636732  
0.2085793736391682 0.2315251097447789 0.4107471546010737  
0.1939198550241752 0.7283094113336682 0.7824086806912539  
0.7002400539435248 0.0654850059566645 0.3050270121412211  
0.5889478941338026 0.2438318488271777 0.3936099677998918  
0.3063296897973912 0.5412854860110051 0.9039458953507326  
0.0785526952471243 0.0574793078902103 0.3038819112454373  
0.8223274793781999 0.7367209003152433 0.8142807172351516  
0.8119245115862607 0.5579237128886172 0.8158032016693952  
0.0965426083393175 0.2506740988863906 0.3072210520136541  
0.2990082700552639 0.7382024985925471 0.9046329203283886  
0.5854115299555489 0.0644737638084707 0.3984191426304807  
0.6071973233054750 0.1513669848742493 0.2497838529556478  
0.2989322347002333 0.6518842956803939 0.7511415950862792  
0.1087915850868317 0.1491972060025226 0.4415170710103450  
0.7798110669040695 0.6513129064856584 0.9532450623714801  
0.5304474227164094 0.2563765326105025 0.5712794764791537  
0.3745055843871375 0.5320292956092751 0.0759287519032180  
0.0164356534259548 0.0245215175518071 0.1354823014373085  
0.8754895099743650 0.7708773213498822 0.6393109755263380  
0.8686337381277378 0.5319701854612885 0.6405809851830591  
0.0245192986452789 0.2684930978219097 0.1410170183016806  
0.3745077180997743 0.7659102866271390 0.0636503460387705  
0.5157967440720602 0.0255862674750459 0.5606153065211451  
0.4564894078442762 0.2390889826322150 0.4092588112505803  
0.4363905421387249 0.5698330603620776 0.9100388615317403  
0.9469858306068887 0.0539399620003034 0.2982711332939948  
0.9533598629473194 0.7453657689758509 0.7950007571584504  
0.9436184948563844 0.5628233104352417 0.7977534687520667  
0.9650168460888470 0.2375795695762439 0.3124573918366965  
0.4305608691237673 0.7522201130474158 0.8824933148620701  
0.4536291843647081 0.0594754176268121 0.3940870565494433  
0.4997464887383279 0.1391245755272929 0.6584256629611899  
0.4051200663824432 0.6514259676607803 0.1554221941347316  
0.0007899322400649 0.1484984010215557 0.0627374771929890  
0.8837135907929717 0.6506180640286024 0.5536390719777434  
0.4074623277183335 0.2350466047689806 0.6297988560891018  
0.4992176255092873 0.5586088387924070 0.1237779418958813  
0.8988645106310591 0.0635320489064422 0.0692493566487999  
0.9892772860488118 0.7322189425069379 0.5573032393966417  
0.9857932013959595 0.5655163850972549 0.5632863852495035  
0.9011464333150832 0.2363813138837776 0.0877157706317697  
0.5012332039411366 0.7370721528761855 0.1027972778492791  
0.3935961019347935 0.0695115476892184 0.6029650153236541  
0.2972578223026996 0.1612735441348706 0.6235192635127720  
0.5992966386243356 0.6469607175085135 0.1223755267499947  
0.7987446890440946 0.1518795418348798 0.0733900505404951  
0.0902560770533766 0.6469612751499113 0.5813790281021373  
0.2982777414364876 0.2821124606668180 0.5418370189604544  
0.6147728088416843 0.5235971501270394 0.0487650281569121  
0.7889546080262939 0.0325906821100040 0.1644341564807255  
0.0942770687964127 0.7683222704741176 0.6646630416374538  
0.0918169288188738 0.5224695210667989 0.6585103361327229  
0.7838572142005072 0.2726103289970220 0.1560982605114439  
0.6239478514295211 0.7674448774748849 0.0444209293638466  
0.2745119152364562 0.0409957170700101 0.5376551020980177  
0.3311173273684699 0.2561655592739524 0.3510031720626725  
0.5656412744919026 0.5626084512895851 0.8696818222610063  
0.8231568945184311 0.0545970277534466 0.3584637265047920  
0.0760638859929979 0.7451277110457064 0.8621412061458935  
0.0703159384260341 0.5593627125233303 0.8501245161449431  
0.8341901751200501 0.2422300393922209 0.3365964821682850  
0.5737806704141450 0.7340667233724356 0.8633055986062681  
0.3255611100879574 0.0571926936912950 0.3516411303698693  
0.4011076358398146 0.1545443565353527 0.2779492795399663  
0.4864283473572938 0.6429389931817507 0.7619746542842790  
0.9052454716711150 0.1483392373767201 0.4283723267627821  
0.9913561399444555 0.6516209388962629 0.9288548438625861  
0.4471504215270320 0.5866349218936880 0.5785359726581193  
0.3888437781184086 0.6954169523519316 0.6073618853607329  
0.4907748773360566 0.6985779809861234 0.4836279753508679  
0.2291949150797320 0.6520499293737286 0.5833329406598199  
0.5758496950782013 0.6483578265316724 0.6060036763508415  
0.3259529314264030 0.5965544933600719 0.4638286602988895  
0.6257943087687103 0.4734239284369756 0.3028507596088957  
0.2750500112646762 0.3372854114966025 0.7997834439048823  
0.1268624557224613 0.8240901966377777 0.4080597085679717  
0.7740496701609743 0.9730424587288664 0.9009912194315473  
0.7739934699419369 0.3289513940333214 0.9009286456027650  
0.1262928732677908 0.4747328307795664 0.4055974564386843  
0.2803178643502297 0.9806901454238862 0.7903453013796911  
0.6246069948012609 0.8249348128433274 0.2879977565101453  
0.5246476476677725 0.4348667546163532 0.4614117234190812  
0.3797888302300350 0.3649062038046696 0.9545095587133738  
0.0235334721157108 0.8605432140356156 0.2560430627001132  
0.8787917330521613 0.9353342444251653 0.7519572627605370  
0.8768248544246676 0.3664128078659387 0.7517638463922960  
0.0242456403276278 0.4382039403445280 0.2547457823750611  
0.3716209803589516 0.9343960466208839 0.9522070903194606  
0.5267746021228634 0.8690585050372229 0.4441802804667822  
0.4757049626272168 0.4414066573766971 0.6767085206061940  
0.4359752021481528 0.3500422576596301 0.1654100046260225

0.9702043242821075 0.8502186376532821 0.0398159687514018  
 0.9270200611846421 0.9483677522578475 0.5344162895370514  
 0.9266152968701957 0.3499039446977819 0.5331937403971855  
 0.9681853812333618 0.4514392066867621 0.0374798606266984  
 0.4239870860094232 0.9557894004835593 0.1652768712980501  
 0.4796165415124661 0.8419343850823783 0.6571035551833869  
 0.3237189679145958 0.4518280576096185 0.6492200000093650  
 0.5872840345471259 0.3519558612608161 0.1519871212702523  
 0.8176792596417748 0.8522336426299930 0.0474932867871748  
 0.0813791491985377 0.9489660064356464 0.5485389243104969  
 0.0827362336342169 0.3502413337214658 0.5484619384113647  
 0.8136645919167207 0.4500780842362228 0.0497746390907450  
 0.5788223425589502 0.9513826962296432 0.1484384445670104  
 0.3248428885362499 0.8529882167278174 0.6542407289719955  
 0.2684917528760590 0.4343139124535393 0.4264980580457329  
 0.6299458270630850 0.3649657195479604 0.9322387598646599  
 0.7657821882362589 0.8680926419396571 0.2637144431056889  
 0.1352688965062173 0.9322635582600678 0.7714806263109965  
 0.1289577666859830 0.3661062413646369 0.7749050988493111  
 0.7675248855469163 0.4310343424771175 0.2690606887287799  
 0.6262559636782026 0.9374366574915969 0.9218371345227789  
 0.2717413932120374 0.8630316820002207 0.4314685951424359  
 0.4063255795799148 0.4707895879027014 0.3233184056769113  
 0.4997679528937083 0.3174870256560623 0.8280013942344211  
 0.8978191394788494 0.8281726966207358 0.3767830324390042  
 0.0011813341592471 0.9709552929670017 0.8820792607777332  
 0.9965859939899371 0.3270523185864642 0.8850697317931643  
 0.8993103150194616 0.4716652625926567 0.3781419111688845  
 0.4949418452867851 0.9594568886054704 0.8167213360723444  
 0.4033408229610168 0.8331095117348317 0.3181971661229278  
 0.6259753897633320 0.2272289352031465 0.2874482778521775  
 0.1199305929705103 0.0710426117732453 0.4071762335848688  
 0.7769298806712817 0.7293474838016530 0.9153775028552749  
 0.7711109053281385 0.5730529002417074 0.9193739791310097  
 0.1280325689987451 0.2270737239026391 0.4155559140359804  
 0.2748686537803290 0.7269937113553213 0.7885143574431979  
 0.6212941843764181 0.0748798084441612 0.2889931240833095  
 0.5244723686101529 0.2737551936490500 0.4515338989857011  
 0.3762871179030543 0.5219046939906885 0.9534754307808379  
 0.0147940768787543 0.0186816853618751 0.2577010111269455  
 0.8823473599156600 0.7776167120899238 0.7609753171240893  
 0.8761376010874429 0.5243808063167412 0.7621674302173800  
 0.0264327844101041 0.2789002065194129 0.2626535514348063  
 0.3664852171697520 0.7773900900339088 0.9423293538511647  
 0.5201874101072129 0.0244325892627492 0.4383240101618080  
 0.4846473588100881 0.2193300396980217 0.6563674708286356  
 0.4223024427800949 0.5717560992596885 0.1550707679724251  
 0.978000733797932 0.0704254230146648 0.0518318196499793  
 0.9091821878727537 0.7280148458876876 0.5483990350463138  
 0.9061976647304868 0.5722403095091413 0.5504647243376134  
 0.9792731321005891 0.2272997828892216 0.0598651665839099  
 0.4249007672294943 0.7300101978471190 0.1420268614318764  
 0.4695739196084643 0.0642059793305869 0.6430281127353424  
 0.3273377166501508 0.2371542708760142 0.6348094580678135  
 0.5785598138905650 0.5684317823246449 0.1358874396842951  
 0.8192000548412788 0.0726225229873093 0.0679693441265293  
 0.0685975268909447 0.7262088261809879 0.5674158962762562  
 0.0653777970182377 0.5687595491228802 0.5663596252270979  
 0.8217590087573109 0.2304006534203709 0.0682139690818790  
 0.5798652388245638 0.7264729368129285 0.1264208995440680  
 0.3151773065797798 0.0811005116948145 0.6249322234560705  
 0.2722549776052589 0.2807239300905929 0.4253636298405303  
 0.6245043264539963 0.5214950419259731 0.9265041841663192  
 0.7677690387305341 0.0244919041318205 0.2822889307699600  
 0.1269410184285540 0.7735828063471346 0.7771097435852365  
 0.1226247708423392 0.5233413369334464 0.7733978015939369  
 0.7716385029673432 0.2749177456560395 0.2777139535350513  
 0.6291235165511626 0.7768003713614825 0.9215569907739164  
 0.2666766912649283 0.0238446004755647 0.4179744065113983  
 0.4045243932381026 0.2322018480381898 0.3157152493838117  
 0.4918872269876362 0.5700942971924123 0.8211201094244365  
 0.8985195159679267 0.0701041189191975 0.3936338317112985  
 0.9995832593548356 0.7297008645611628 0.8935341746432616  
 0.9958809769390161 0.5737615157662355 0.8904739412481331  
 0.9043398937209698 0.2264178192065681 0.3914825289365410  
 0.3985696131326534 0.0753326038739406 0.3080229893815536

Structure 2xH2O/16 S=8/2

1.0000000000000000  
 20.1473052208878016 0.0000000000000000 0.0000000000000000  
 0.0000000000000000 19.7681594983396991 0.0000000000000000  
 0.0000000000000000 0.0000000000000000 13.2309279702280005  
 Al Fe H O Si  
 2 2 10 200 94  
 Direct  
 0.2748559855882978 0.5661526381082649 0.7929380864140035  
 0.4967977036357037 0.7254856390611208 0.8130758084470602  
 0.3223769840246555 0.6232758735651275 0.6055370954519810  
 0.4872585479220971 0.6698093753538125 0.6044972675756681  
 0.5461146357011327 0.6817275999323440 0.3275915329553646  
 0.4259875407864776 0.6625156544479502 0.3358628419180128  
 0.4483611882601982 0.7049161646941895 0.4505048345540394

0.5240050530371774 0.6139105701788143 0.3768628741531328  
0.1893509215832078 0.6648397701270803 0.5711286295058600  
0.2348172683325352 0.7050665546247539 0.4955199655435508  
0.6086943870257995 0.6829089845886418 0.6849411431852108  
0.6030956897528926 0.7276590644406117 0.5878225943076604  
0.2822600731982589 0.5784403514459230 0.4387844192356529  
0.3703794757314362 0.6437048339484718 0.4160894664140498  
0.7065687546696648 0.4714660851510470 0.3184913176107841  
0.1956407272125032 0.3318149778385934 0.8155540546384086  
0.2034606217096488 0.8205690830484829 0.3913243683303665  
0.6922352097433279 0.9780787440521250 0.8870365956525156  
0.6967650657074925 0.3183450871884646 0.8906935797812445  
0.2062579072591603 0.4847495307686812 0.3983978198975339  
0.1968532465633932 0.9741730949156178 0.8045937575874021  
0.6991251617150143 0.8213256686439333 0.3014433717743256  
0.5893450622714663 0.4715898996882116 0.4095079471377653  
0.3088439501734763 0.3440029146389229 0.9103584173579495  
0.0887417083097323 0.8263558436692859 0.2957351113694447  
0.8073191264909714 0.9702535265860213 0.7910105395295568  
0.8089532569335703 0.3308553269412971 0.7904839268545765  
0.095532011133130 0.4680916397712687 0.2953280158952399  
0.3117355721547437 0.9765451591678292 0.8967455883134559  
0.5860116086328376 0.8257197958158490 0.3993526307333128  
0.6091398773923447 0.5427859035358584 0.2412202612336191  
0.3023928336155298 0.2732323723869400 0.7383750462350936  
0.1013334023973575 0.7581750356999862 0.4694497873999345  
0.7964947141076767 0.0396626264681878 0.9624697418212130  
0.8073837794437840 0.2592673760492579 0.9595369806114267  
0.0972938721456838 0.5432822003636159 0.4636162089975769  
0.2943039963040356 0.0498995120767288 0.7332892624382363  
0.5934924398919670 0.7524811697712894 0.2362536355644098  
0.6030960599994012 0.4083073079258184 0.2356733530494182  
0.2903856528160753 0.4086797143023883 0.7381785544061780  
0.1050390223310556 0.8936146773469862 0.4661131070831225  
0.7913165860768037 0.9044138716485141 0.9603870906565254  
0.7939982095293203 0.3938671579900732 0.9643363379222614  
0.1085135533080960 0.4091371366736403 0.4750726760888486  
0.3012581370493441 0.9164766412431194 0.7150955385317694  
0.5976186852478272 0.8872215469565040 0.2185667305370529  
0.5275144598807324 0.4424248328675205 0.5801097800874104  
0.3807463841322765 0.3531079093753084 0.0752633499057806  
0.0188473416070599 0.8559148835921864 0.1327131097363832  
0.8759018680166649 0.9370167160864945 0.6303193292436220  
0.8790222280688966 0.3621959446550873 0.6305312558989548  
0.0202286461889306 0.4434545194947404 0.1345535159116827  
0.3677452749441545 0.9411744037334197 0.0704387440281138  
0.5263713952071148 0.8638487208859185 0.5679993597619204  
0.5253086515484631 0.3540222449272704 0.4282821584507599  
0.3990308696688878 0.4441962287058026 0.9287817505779572  
0.0156528287511902 0.9387658001194005 0.2923905926664023  
0.8796919101431586 0.8565641175038460 0.7925509404015244  
0.8816764412784425 0.4434865859338628 0.7928532510949631  
0.0195449116743056 0.3581961687170558 0.2921573439684045  
0.3569455324087751 0.8532827676346186 0.9172960535602921  
0.5307984889888593 0.9449632698400142 0.4049605992481342  
0.4570605837834416 0.4680508360293409 0.4162306120454576  
0.4367355234313943 0.3176953190367276 0.9010866084990843  
0.9583309438776929 0.8185472417958616 0.3027459440153971  
0.9391250946968330 0.9749525604935917 0.7971909247666513  
0.9405533012103925 0.3250353401425056 0.7984050950364621  
0.9663366639728543 0.4800149551572303 0.3101901246400687  
0.4419946874436554 0.9562484123350387 0.9106182481141609  
0.4528212457379703 0.8392951988453941 0.4066464183787558  
0.4756120190535502 0.5123729259734395 0.7332644756879895  
0.4312372724930409 0.2754297004959356 0.2181348801528055  
0.9716154915893019 0.7768629376968313 0.9894842611913346  
0.9155790089408693 0.0230972986802783 0.4904705064767091  
0.9110355270193559 0.2730936788814953 0.4908318360273571  
0.9771867434867704 0.5236705527982346 0.9890594112552418  
0.4090959266768295 0.0354584808722751 0.1975201139685128  
0.4912479259759981 0.7641580920867673 0.6929541038037327  
0.3999412096404416 0.4297849121575740 0.6295830133952538  
0.5099801793382471 0.3577393091087982 0.1150099777574807  
0.8924213512695914 0.8669536378666719 0.0774949533474401  
0.0011732913836751 0.9361208778163578 0.5707488786536641  
0.0032521287290985 0.3566120431422120 0.5659718541506532  
0.8939414991854657 0.4373588775977011 0.0778194704134028  
0.4947799624473312 0.9430762624642712 0.1262247901749053  
0.4000409384552763 0.8534175768122689 0.6240103349959312  
0.4956415506296383 0.3812599628313376 0.7480190407215477  
0.4245902819042294 0.4084342448564299 0.2449883387374197  
0.9893175191808201 0.9077799806782668 0.9544775185460586  
0.9045543448672835 0.8925315384263363 0.4485384706573373  
0.9069929620198275 0.4040714375922798 0.4481479841122345  
0.9900910635296463 0.3913200936785652 0.9568693131932624  
0.4001691439343333 0.9097763707645302 0.2575628643455408  
0.4926136061631892 0.8887814626342520 0.7565505163901411  
0.3162894063577416 0.5321115156914243 0.6822837358982304  
0.5996967366383864 0.2776485028546644 0.199995985688878  
0.8080508489903554 0.7753057378804021 0.0064544886124040  
0.0907973535726718 0.0245048747432861 0.5014643971257358  
0.1002043154407820 0.2757661468009282 0.5021686942327073

0.8036756209335553 0.5241617942908113 0.0088816056783239  
0.5882500297699883 0.0215113407300265 0.2045535961571848  
0.3040232020234243 0.7817327675027897 0.7121920035813504  
0.2812551516682653 0.4395561898817756 0.5458322415484390  
0.6356167369573640 0.3613915431996178 0.0555270864006227  
0.7669966418840953 0.8644820973792630 0.1430203922694017  
0.1228788289650052 0.9395313309962089 0.6483046727677712  
0.1209460870022467 0.3562930846000270 0.6562268948765193  
0.7686099921375867 0.4348164787366784 0.1477252785409718  
0.6149625360389587 0.9483494191172935 0.0437114864358357  
0.2799081004875399 0.8490108598382526 0.5457274249898403  
0.3307170165877217 0.4581006265885234 0.3603101139388325  
0.5673565722258604 0.3255855526487210 0.8940875963528389  
0.8285951300590000 0.8331478350789020 0.3107812157148764  
0.068502226332316 0.9692513407244620 0.8245428386734848  
0.0684129200451613 0.3191095015160468 0.8336288150534930  
0.8366338424671764 0.4653629331061944 0.3071484649853880  
0.5662200002381754 0.9749010266456037 0.8601924179068688  
0.3277114695951485 0.8243327088877719 0.3597838925851420  
0.2478293600572255 0.3572350877168483 0.3960496664953477  
0.6384258096159092 0.4394833522246027 0.8921728382669932  
0.7537302099525092 0.9432517306901512 0.3053514396137922  
0.1374335506842430 0.8551577326745159 0.8039412745479187  
0.1171549641075521 0.4413135793761137 0.8120150534599980  
0.7638699442949244 0.3526804992399329 0.3091638862995639  
0.6311398224349301 0.8592965260704850 0.8946370205479182  
0.2654049198308939 0.9412336528061513 0.4019726154323585  
0.4101655498958558 0.5420462170024793 0.2674499243406718  
0.5042437165224842 0.2484094368646338 0.7665318595079923  
0.8871386659799928 0.7580302332600386 0.4426339206728345  
0.9956312497776111 0.0433042421801066 0.9433709342541409  
0.9866622971830671 0.2558167876138956 0.9517935388687052  
0.8904901681567036 0.5393255508787925 0.4455034335529406  
0.4701829151518443 0.0226604418746457 0.7449064280526129  
0.4246830166913472 0.7776453969849291 0.2379476490052311  
0.7046022830927233 0.2327628357362995 0.3061096742034667  
0.1918627941666712 0.5515885351231825 0.7869328414648409  
0.1946276927527090 0.0528616031903959 0.3798229630772009  
0.7022757672967511 0.7469437271565843 0.8896166698127681  
0.6962541405505034 0.5597588616725123 0.8992302976583152  
0.2097188453865860 0.2306178635061933 0.4067150801334400  
0.1894994286882410 0.7322946500304935 0.7841099608172467  
0.6980799360103576 0.0635933323144226 0.3004297095286285  
0.5883049798362423 0.2397477062284356 0.3937175949075026  
0.3124301982629297 0.5448526799889594 0.9036236884717220  
0.0756373606545377 0.0580401181414212 0.3068979164759146  
0.8200687730120543 0.7373699192384209 0.8127527850550166  
0.8125350003849789 0.5574843107112781 0.8136233297058119  
0.0966685296881984 0.2486791369662283 0.3060306559232839  
0.2959380592600324 0.7368308526351748 0.9012821764729073  
0.5831434008346753 0.0660478912692866 0.3951435267971308  
0.6070750101055042 0.1508167685663392 0.2450870001154586  
0.2890027109049590 0.6502521141208819 0.7474674620229003  
0.1100867472757009 0.1492957453201652 0.4430341312152623  
0.7855220537123944 0.6501143001188426 0.9546633020465465  
0.5291982892181244 0.2574570930247608 0.5700437039678036  
0.3786902413363408 0.5356448279830563 0.0743926461667790  
0.0161157815317586 0.0232817425756448 0.1372700969241615  
0.8760980776199714 0.7713723554634005 0.6394643767734495  
0.8735139944258603 0.5294692138225365 0.6417361602124082  
0.0225093620796876 0.2695795708698591 0.1429560061238129  
0.3718133134465976 0.7616475375618065 0.0607448319697768  
0.5144919568493718 0.0276447422482630 0.5575791428375380  
0.4557737034647824 0.2403421403896743 0.4082013073110992  
0.4432926426294507 0.5691391793267380 0.9074794532156699  
0.9444865160803775 0.0519590225903965 0.2987279122444493  
0.9511387810561007 0.7428608354091166 0.7970759693621492  
0.9440449918576899 0.5617276393025586 0.8024644042698569  
0.9652925093352834 0.2372304740400676 0.3160904893310313  
0.4279795224563864 0.7418123913766685 0.8832503796834806  
0.4518323010838998 0.0525658264470346 0.3864001029419413  
0.4985661995688385 0.1403054715391534 0.6583818894029370  
0.4068123194469774 0.6532842846373808 0.1634732649520207  
0.0044730009058069 0.1481546291200839 0.0659985033027642  
0.8806234714024472 0.6496078937817742 0.5565388055254266  
0.4063932691458875 0.2360092796714314 0.6314813739480638  
0.5017513611755765 0.5602952435592060 0.1238805678982446  
0.8995317512866748 0.0677721940121442 0.0762977974329153  
0.9887060466619884 0.7264922220844040 0.5593896414998576  
0.9886286456909841 0.5736736319632817 0.5673439729387598  
0.9003367593420788 0.2291833393549418 0.0966518228877224  
0.5015856238264380 0.7333894740723110 0.0924852943485767  
0.3928528448677765 0.0701756090017493 0.6006372588805955  
0.2965123235528583 0.1609232741611281 0.6256778804752946  
0.6033660612511726 0.6471732146345949 0.1134393996582301  
0.7948444947418416 0.1497555979379499 0.0746526585470247  
0.0972243450919163 0.6497021828701955 0.5831688676148471  
0.2984540619771858 0.2806939734060461 0.5390767031957218  
0.6143479188010843 0.5217161686901695 0.0458755581591548  
0.7884652120619676 0.0291158311746211 0.1627538370505737  
0.0889080553801757 0.7712385577706635 0.6688294290986178  
0.0926314997403802 0.5252317972734882 0.6626900672774716

0.7825624450025913 0.2717219669988409 0.1545306287925612  
0.6237926370462640 0.7720719709720170 0.0456871940520880  
0.2734110899370971 0.0414492763504756 0.5364816544512335  
0.3315052207850751 0.2587807124183626 0.3469107064452291  
0.5703367522579463 0.5523093625573430 0.8602516812621427  
0.8205173832057515 0.0541461475753418 0.3571287575892809  
0.0726992750251195 0.7457984346894767 0.8668906163169526  
0.0700510624468559 0.5620421365936467 0.8548016337029789  
0.8337161667495848 0.2399101150362737 0.3340820656073020  
0.5737563744472363 0.7392049147169313 0.8649616290282586  
0.3232592691420617 0.0564888768908942 0.3496322107695790  
0.4003085186965040 0.1540541299957344 0.2805930168203788  
0.4988513446531661 0.6418962015633668 0.7608529423773517  
0.9036766107216249 0.1470325785417484 0.4284636175979347  
0.9888058410159336 0.6514142208228230 0.9349617443767538  
0.4959345140669556 0.5946719504356407 0.5536374674289070  
0.3988655363780375 0.6684063597748335 0.6166188075494291  
0.5183654043889002 0.6418602871484357 0.3165390317504801  
0.4883536579770443 0.7211246198112131 0.4987680902441730  
0.2347261402427464 0.6827079954639946 0.5612457305661127  
0.5947379364034977 0.6822537273964483 0.6140757196997180  
0.3963842875087208 0.6824408320563912 0.3870341117235340  
0.3232932441850009 0.5894190240945041 0.4743354316037787  
0.6268897396156149 0.4734331146420783 0.3005485353527053  
0.2747852592380609 0.3388758312235945 0.7993908451210920  
0.1239548756104232 0.8251199697061607 0.4063056832520063  
0.7715917821143471 0.9733256989991843 0.9013293798913798  
0.7765395643504426 0.3251883515870304 0.9027002656278026  
0.1261320243060354 0.4756062846292156 0.4086816934957322  
0.2762525448927795 0.9782650862889322 0.7866694526873995  
0.6191646702834921 0.8230228299108264 0.2871809899067476  
0.5249986617443658 0.4338808059517696 0.4584215753721917  
0.3812788446427625 0.3656938026857077 0.9539776936208980  
0.0201427043900877 0.8603391792562365 0.2547982764299253  
0.8754698250924806 0.9345442572450210 0.7525048328431186  
0.8776362959888439 0.3656851631376495 0.7524453221299366  
0.0251035043045381 0.4369170945340276 0.2562428450350015  
0.369620430687183 0.9311648997575841 0.94888380736867276  
0.5234102259215874 0.8676943746145165 0.4457526017636999  
0.4749697656975316 0.4418507734443678 0.6729881996939145  
0.4362215220544978 0.3487232383461457 0.1638275737702784  
0.9678081141183361 0.8521195711151802 0.0378608984385301  
0.9246691330143419 0.9471681024165171 0.5342441740462326  
0.9258480580653229 0.3486328724102196 0.5332124902383923  
0.9700519268361023 0.4488580521848298 0.0385493775374057  
0.4187547305195033 0.9573072762878231 0.1621196506801691  
0.4765451563310527 0.8415415099302643 0.6591763211645789  
0.3233842466229448 0.4524388201768700 0.6475450181986044  
0.5869207199304900 0.3515490222810455 0.1515054683261162  
0.8151614208420934 0.8524459530202975 0.0470032798189676  
0.0793468724704149 0.9491227833376848 0.5468775315890705  
0.0828188784923985 0.3494295357625004 0.5494235800831184  
0.8155987766102946 0.4476877961204889 0.0501247157144398  
0.5737556660693364 0.9500387773219304 0.1485392694569346  
0.3216157083797119 0.8500251288815882 0.6505349916298517  
0.2679136456726172 0.4343444655308242 0.4256209993574833  
0.6341343805073321 0.3618850591629857 0.9327846903545842  
0.7621976660289705 0.8661498196292914 0.2651514892814824  
0.1309312407934418 0.9339890548705591 0.7699960412952417  
0.1254978031519121 0.3630267763938672 0.7783608214543782  
0.7687168420115670 0.4305534986081926 0.2703327355765109  
0.6255445127455258 0.9388768982499136 0.9227915485549486  
0.2703284728238430 0.8608746153030485 0.4253120190273608  
0.4058171504575088 0.4688843033075049 0.3220092293202351  
0.5008539698685138 0.3193612414412420 0.8273403082921383  
0.8948878783640669 0.8267111829088629 0.3771966714490372  
0.9978625069417920 0.9728428956193225 0.8809492959641468  
0.9964029622840685 0.3242657394163539 0.8865299234279593  
0.9004022703972293 0.4712936431147551 0.3792354081779016  
0.4927802166168523 0.9603854939978802 0.8163105593607921  
0.4010375112997790 0.8367412107767848 0.3135875443524441  
0.6251385513966474 0.2260551491288573 0.2863971193358059  
0.1185029548553118 0.0709138821949262 0.4088687981251752  
0.7781224873540009 0.7278560867013415 0.9168938054935343  
0.7744037395794900 0.5722813438626573 0.9197338161186542  
0.1292793993939275 0.2266686139340131 0.4142198806753433  
0.2697249080130469 0.7265877394456488 0.7861278310211077  
0.6192139856650875 0.0743002422352364 0.2855220708651497  
0.5247548751340951 0.2732349500692461 0.4497123333649068  
0.3817890797799524 0.5237311757589935 0.9525257612543410  
0.0131500223848547 0.0179251095606474 0.2595143303031432  
0.8814662948025035 0.7771499243989045 0.7615061463965070  
0.8776196462994917 0.5230789335760297 0.7637487206243821  
0.0263067934209374 0.2783117477001950 0.2648270168060446  
0.3650574837692826 0.7726067299808786 0.9393089933775551  
0.5196240639344599 0.0234165433108231 0.4355907570506578  
0.4839162321345090 0.2206204043006825 0.6559401301077753  
0.4254191676190879 0.5736354853488022 0.1566353369905274  
0.9784309329164551 0.0710392857459271 0.0551917641149303  
0.9084954184865841 0.7261871796914852 0.5499026293024836  
0.9087829174546239 0.5729084103770383 0.5529183314986772  
0.9780820519367665 0.2255777480057334 0.0641725324666658

0.4262942662943424 0.7309517061437039 0.1378401674715245  
0.4687803428889183 0.0654085035015161 0.6411776378189894  
0.3261856498535102 0.2372166319757308 0.6344205022529706  
0.5812476185793894 0.5691844930844746 0.1331849892978447  
0.8196938340713120 0.0716834624124811 0.0692517881179825  
0.0679165978097305 0.7272045040563779 0.5709584998841465  
0.0683789295364853 0.5718416634506875 0.5699701659103685  
0.8216268204865106 0.2272260981127693 0.0703624523723292  
0.5797897307023504 0.7255089116379734 0.1210372902454056  
0.3144871949634595 0.0807692497229105 0.6241966512869033  
0.2724637530689357 0.2808862533426296 0.4226734636493632  
0.6292277931642291 0.5181649895140505 0.9253046449153784  
0.7659832829646978 0.0227399914394851 0.2805377378199163  
0.1220146712098697 0.7761354796987311 0.7812706825743798  
0.1195727407820601 0.5206395848410036 0.7797804528614554  
0.7713237385054679 0.2739681410939130 0.2764906875680269  
0.6311075100393467 0.7790853026056013 0.9226442433568955  
0.2652617304334384 0.0227936416170728 0.4173065035034693  
0.4045705469358017 0.2323927748963898 0.3139638620981858  
0.4970591900068850 0.5679732190569008 0.8158828754521676  
0.8958551628031515 0.0689662541772256 0.3934814646814726  
0.9963302345186654 0.7291270578364385 0.8973613482253281  
0.9954108435482926 0.5737156235083515 0.8958615541172771  
0.9030610692943423 0.2252429701494761 0.3919693167705011  
0.3960375271751271 0.0740467786006224 0.3041685536075687

Structure 16 S=8/2

1.0000000000000000  
20.1473052208877697 0.0000000000000000 0.0000000000000000  
0.0000000000000000 19.7681594983396742 0.0000000000000000  
0.0000000000000000 0.0000000000000000 13.2309279702280254

Al Fe H O Si  
2 2 6 198 94

Direct

0.2741959976032308 0.5680494700739492 0.7860831419139757  
0.4923210945046440 0.7275564973751395 0.8120447304953272  
0.3287043836973985 0.6232900481058646 0.5984325512445172  
0.4956251724054013 0.6677123569986901 0.6116626639758186  
0.5244871289316553 0.6826111833813732 0.4441497708048548  
0.1933206842027162 0.6644743190460211 0.5807701568078592  
0.2329688839207139 0.6949506895815067 0.4895056888711271  
0.6055387240304217 0.6975064384110129 0.7283189147653509  
0.6187793572169116 0.7121678437489533 0.6129065479447925  
0.2806492806889648 0.5748340167244863 0.4463359994444995  
0.7040362103663125 0.4750915507859171 0.3104080571005743  
0.1946267952398323 0.3293788455301865 0.8116802997490919  
0.2063752379134440 0.8189256530194742 0.3960116425487263  
0.6927864477060148 0.9724652525116461 0.8825309742367459  
0.6947879233747938 0.3232331159616497 0.8862310079190308  
0.2064256963067976 0.4832076377513481 0.3952020444612766  
0.1999312820551320 0.9713122925462598 0.8064383925166221  
0.7052097805243053 0.8177168465985578 0.2987301934833768  
0.5906128598038427 0.4670863192842638 0.4113596833952587  
0.3072171116760564 0.3397066719635751 0.9080749973441429  
0.0939962053507758 0.8299859170960824 0.2936271899373398  
0.8098772631067623 0.9723897240634406 0.7906480037511237  
0.8074584091792544 0.3308799175114471 0.7874989733052630  
0.0942364854846747 0.4690918400088782 0.2927253590973030  
0.3139630310545372 0.9817087544594241 0.9032374965850196  
0.5961418231142839 0.8359543400306356 0.4018876493164114  
0.5985642801633877 0.5420813103462195 0.2450238309560123  
0.3013204471241313 0.2718067563037322 0.7342107604853678  
0.1002397390786613 0.7565491352259918 0.4632990583699180  
0.7920392919829452 0.0396724569083108 0.9627253559094163  
0.8022005054825447 0.2586442709868798 0.9565997437635969  
0.0988878089847092 0.5436377852667433 0.4611308768082522  
0.2938238116811426 0.0518258864088038 0.7363453514539084  
0.5932035245345753 0.7567232604256676 0.2408480498176995  
0.6015084253937755 0.4073703969029719 0.2342342912862453  
0.2897422582458442 0.4075557782601006 0.7369938445501623  
0.1072697713806138 0.8919335946216367 0.4689917404230124  
0.7952871983973018 0.9041661149512086 0.9574264605369244  
0.7951861194326995 0.3934918993225718 0.9616072819845074  
0.1076006352628869 0.4090019894525623 0.4705732348456483  
0.3106375937685132 0.9189904654016966 0.7259021542160131  
0.6078785588722997 0.8898215504209854 0.2171271862953857  
0.5265191070554536 0.4412018896901199 0.5801884065937802  
0.3800452714545890 0.3544210075741668 0.0725291837747462  
0.0203632527032778 0.8554544581650906 0.1332947246699363  
0.8771425230572709 0.9388088174279787 0.6289050557805288  
0.8786517190555646 0.3616915344618173 0.6285823693536570  
0.0193007647924829 0.4438976520606462 0.1325828702626317  
0.3703214333711250 0.9423141508040846 0.0747555737013687  
0.5253799599670335 0.8623808627976565 0.5643723217171034  
0.5205484579505885 0.3530836498713472 0.4281195654897203  
0.3947942593616593 0.4412573843112290 0.9191284435094661  
0.0163274703914300 0.9397769526704737 0.2910590937159406  
0.8798389496136739 0.8571292139360969 0.7898603183162568  
0.8808101906054461 0.4435883786610026 0.7897784705712730  
0.0187749820789545 0.3584402988286147 0.2898927570992099  
0.3501614172711551 0.8551868244775819 0.9243646729574256  
0.5190921576018993 0.9440489078136933 0.4024453661788566



0.4578132226846097 0.4691960042049457 0.4143772619254140  
0.4354108218614511 0.3148871961711337 0.8997482774295362  
0.9644115929453170 0.8178683164989941 0.3080810840806213  
0.9422772993656134 0.9738202525583919 0.7951364737717243  
0.9385201101965714 0.3244762788577607 0.7982114223366813  
0.9644138954430241 0.4797830612879723 0.3077578618655459  
0.4430043927964882 0.9513402368743434 0.9120535348626497  
0.4646170197905121 0.8248757184073723 0.3937835421832945  
0.476649777682054 0.5114362113110095 0.7344413517255919  
0.4289045334288732 0.2729073871090326 0.2121866293939184  
0.9765739343792377 0.7768880610463282 0.9875097732694526  
0.9181673827251702 0.0242964819874983 0.4889113815796121  
0.9125058759046696 0.2731779280770746 0.4892147938249674  
0.9767697828310796 0.5242778769017008 0.9869444225411093  
0.4136099664154130 0.0268197503798940 0.2115441117589968  
0.4859775605182226 0.7631715872965743 0.6889806964842528  
0.3992806115033170 0.4299158452554335 0.6291146761942291  
0.5091144312974683 0.3559179940821207 0.1136023417254573  
0.8943465941865082 0.8639413609000018 0.0766756704007655  
0.0023962678879457 0.9356798046808922 0.5694529380695542  
0.0030797490408980 0.3578353100649774 0.5645813915226607  
0.8929001325596690 0.4394270423713921 0.0767852658365531  
0.4972737029353377 0.9362378724754421 0.1328551584967142  
0.3986575328642224 0.8544356488240871 0.6149455406361678  
0.4939789035032736 0.3799282060601232 0.7476956328713992  
0.4243077034689569 0.4051150476880787 0.2462100757008011  
0.9900718608799145 0.9084794021733249 0.9556506308215631  
0.9049499665200540 0.8938553757817210 0.4470991704870003  
0.9060490227419505 0.4040963451133459 0.4464246320247994  
0.9880580586698383 0.3918958068131022 0.9554534223074532  
0.3997948436693229 0.8962015010094281 0.2546603243363659  
0.4900673849802147 0.8877755628381485 0.7524595490257385  
0.3157189729710638 0.5318122702972964 0.6777493510094371  
0.5997362452013192 0.2760072000565751 0.1982336668684349  
0.8083459098680955 0.7744553129423962 0.0049565179968638  
0.0914935483895598 0.0235975423930624 0.4989371575059526  
0.0996432656929436 0.2760708616261904 0.5008433622126894  
0.8019142563213009 0.5241781197432022 0.0042905523797708  
0.5873173357035067 0.0221411359451229 0.2038618581657573  
0.3073279186538702 0.7839353862926627 0.7131857179791363  
0.2799918727648501 0.4373693798061036 0.5446161834446035  
0.6344642598191473 0.3611911545394764 0.054245006412954  
0.7683544037132614 0.8655658290834599 0.1393203442346038  
0.1238237079683038 0.9420162008986097 0.6492879269552384  
0.1216005319533457 0.3586182324248509 0.6523724053107173  
0.7671026572747107 0.4352545054865005 0.1434955366358779  
0.6140960956452094 0.9509940626343817 0.0408460096240542  
0.2718818013162751 0.8594396628904029 0.5584565482255306  
0.3312183051441111 0.4558503995248003 0.3609637984828413  
0.5657630971942363 0.3244070535757492 0.8935117817356327  
0.8350239564343516 0.8347886001709780 0.3021536583178918  
0.0716282841202983 0.9677806946771856 0.8276257406710931  
0.0669699574181684 0.3245480271782787 0.8284356162586656  
0.8344547896620109 0.4634959199217603 0.3047759897271992  
0.5659843406045139 0.9730920574563463 0.8557829026496070  
0.3341007285763300 0.8260300421536582 0.3899834751973836  
0.2473634702098673 0.3556345778256045 0.3931591154886182  
0.6307333415670512 0.4418033686352103 0.8933851383303544  
0.7554119688813882 0.9418334397058579 0.3042457094920014  
0.1394298385423448 0.8535618013575313 0.8003723774058953  
0.1247428428965843 0.4437747970873423 0.8081760622357459  
0.7579625942018792 0.3536586715460613 0.3048148180133780  
0.6264118919129315 0.8571917537539696 0.8968233619215130  
0.2634074957892911 0.9412044528007342 0.3997104280822539  
0.4088923205515576 0.5388472436836219 0.2628798911882414  
0.5038256287034009 0.2471138755058547 0.7643083546018645  
0.8865676630883584 0.7594732354952595 0.4415013825499510  
0.9971768115231212 0.0436704612685689 0.9412415515662571  
0.9902774749783035 0.2562788697067038 0.9483198813750205  
0.8872025717555216 0.5390548552134853 0.4418986935179039  
0.4677114165959350 0.0220142115400496 0.7479263455760349  
0.4020903580663701 0.7592855428129592 0.2540322520353780  
0.7045933261587316 0.2312400600935513 0.3042083521114171  
0.1901786972205650 0.5596978410963249 0.7750689922113980  
0.1958749942210930 0.0554453367156948 0.3812188659490699  
0.6994232812299019 0.7465249944106809 0.8952370450737429  
0.6944077307849783 0.5591283061715037 0.8944820740172286  
0.2086113583346096 0.2294910485408163 0.4046504124449571  
0.1920561302136315 0.7311936317046172 0.7779252691076773  
0.6983346810480227 0.0617915627317390 0.3003406983712667  
0.5886760682644506 0.2419930115862488 0.3934784237335495  
0.3073046463221287 0.5425405088251277 0.8987805059841326  
0.0773410455719612 0.0581668455790101 0.3044905664231388  
0.8164647206468248 0.7400179311136603 0.8103723462782491  
0.811366322090516 0.5573969196582951 0.8092180111909050  
0.0954266726110530 0.2486998877807210 0.3047344461368847  
0.2968491928977804 0.7356283481006570 0.8995962018702355  
0.5852447493881270 0.0594525419007509 0.3983168754103025  
0.6055837151069667 0.1493066265975422 0.2510107240114129  
0.2953363934795900 0.6516030185899367 0.7425680630895399  
0.1082638513539712 0.1494166203185410 0.4422920779547742  
0.7841605767989102 0.6497815453625297 0.9501961792451022

0.5272166098897469 0.2553575445486665 0.5672194078444828  
0.3738146822455305 0.5267921766185277 0.0704984043990837  
0.0162595689253250 0.0242362000281874 0.1355541263960039  
0.8750567575548154 0.7706911117667700 0.6383124207849149  
0.8737800625225535 0.5297216565115510 0.6385281953964344  
0.0221697202522724 0.2697702183404153 0.1405557677147702  
0.3666726918943065 0.7622276228358867 0.0649129723664602  
0.5144923671037824 0.0240012005195978 0.5613527921604821  
0.4556524309907768 0.2375449600478564 0.4020162058313441  
0.4376671059369966 0.5669733326611617 0.9068891202889426  
0.9456397479223223 0.0536406437880198 0.2972015309335135  
0.9488277264159599 0.7425545780569630 0.7973514845847635  
0.9433444640388741 0.5617586467023625 0.8002909211376377  
0.9639426620070817 0.2373575039197450 0.3123590534836777  
0.4292865970635988 0.7495224426401077 0.8904375294500713  
0.4536001209647265 0.0610664647429588 0.3950339712699428  
0.4985563021419026 0.1383353633509214 0.6576444427998624  
0.4005397501119081 0.6465698000814502 0.1503873425757878  
0.0017864555002478 0.1486105798524246 0.0641883024507671  
0.8803969254735377 0.6499113207101764 0.5527391348907437  
0.4054860986810325 0.2329809064552238 0.6300318273893812  
0.4974850524936495 0.5567741944655247 0.1173994479036935  
0.8988847235641422 0.0648830384856214 0.0709538975202350  
0.9883446238363741 0.7276338095213608 0.5584976763543250  
0.9877782362864976 0.5731445686023438 0.5585610943987992  
0.8996310371800180 0.2331162454699344 0.0889256720116426  
0.4937408033723368 0.7379606926125426 0.1114875842448024  
0.3921782038280373 0.0685789738542581 0.6019220877644570  
0.2950628133866213 0.1594094691868270 0.6211725708142470  
0.5936543115809843 0.6485253926083225 0.1244973131969167  
0.7963170580162525 0.1498482669630766 0.0741167731703676  
0.0958207367645384 0.6493042026626705 0.5815548313501969  
0.2989677952693406 0.2791230456646648 0.5349951676961341  
0.6157864829105354 0.5263377269898405 0.0475576402096058  
0.7889243339325129 0.0293450144991892 0.1627165432443742  
0.0917216221814643 0.7717635165399281 0.6623338513834242  
0.0889818021138085 0.5243290256136752 0.6597608123456534  
0.7821447828137551 0.2719637164560146 0.1527875732985642  
0.6135459385932677 0.7692551456876912 0.0443654833072776  
0.2726749507411610 0.0375298253240284 0.5399624444807476  
0.3305328839018568 0.2562437843848804 0.3430310644893217  
0.5662941006266989 0.5581067055506428 0.8658547050049494  
0.8213592287391347 0.0525657322144755 0.3569914329640433  
0.0733651162780795 0.7435319072221602 0.8582150836539866  
0.0698470351091245 0.5607184941764810 0.8523541300751857  
0.8329919844948542 0.2440784482929710 0.3338825103390464  
0.5730180672200126 0.7370304177158703 0.8557935302280122  
0.3248840805246402 0.0557859796553677 0.3556058883879876  
0.3986155774212824 0.1515111920050360 0.2742994480246500  
0.4886524105615375 0.6428424763493391 0.7638415507762704  
0.9017431689265228 0.1480212691925378 0.4254547739459242  
0.9897233655937046 0.6512811176871094 0.9319063608505250  
0.5117334555431622 0.5924921298767214 0.5670496258559563  
0.4064717505480527 0.6654869297949749 0.5958209877002515  
0.5196545218806707 0.7137079983183511 0.5012046657198687  
0.2372185252855453 0.6816676707330083 0.5602443687888424  
0.6011112308806422 0.6783807545851814 0.6595216417605652  
0.3243200503298151 0.5892627346585912 0.4704589434393791  
0.6237004185971167 0.4728883368772394 0.2997613673298804  
0.2737948533695060 0.3369172854304205 0.7963666570754214  
0.1263113410330637 0.8246548423966282 0.4060763581428398  
0.7721030280078247 0.9724116472570726 0.8995319721766135  
0.7746204935537457 0.3260202219197897 0.8995136204973632  
0.1261554074721131 0.4756470958755115 0.4053851212164769  
0.2791689723254656 0.9802915579645293 0.7924223993139681  
0.6251750253631493 0.8253231323662236 0.2883522845944180  
0.5239863321750721 0.4327883664325603 0.4585167382944135  
0.3793884881372588 0.3631999925757274 0.9505122999971233  
0.0234634587271429 0.8611952761316837 0.2551178730206282  
0.8772024018180956 0.9353997823245035 0.7510913148667128  
0.8764650841367896 0.3655431790293800 0.7504027468541049  
0.0238889164785204 0.4372986001227526 0.2542907062287223  
0.3695380868814686 0.9321818916237455 0.9534722235139306  
0.5259251081891906 0.8661911149640822 0.4421161414254732  
0.4742359406313261 0.4411044756887376 0.6732421415318159  
0.4350271750370918 0.3473736784518703 0.1616133235903743  
0.9701401393880927 0.8513834187370422 0.0375556662990460  
0.9260989308688894 0.9481530096020079 0.5328341263241017  
0.9258311110132911 0.3489925770933508 0.5314928060487337  
0.9689662802310878 0.4497904002316377 0.0369814602505048  
0.4211713037717298 0.9503456685706565 0.1687801158692936  
0.4744478005222945 0.8413376950514350 0.6540718292879834  
0.3223215242097205 0.4515481332719439 0.6459317266340823  
0.5860239771358994 0.3501114780960757 0.1504263974258705  
0.8171314844674198 0.8516963080530106 0.0445852351936050  
0.0807301078870813 0.9488594581191265 0.5469284608472541  
0.0825061716679639 0.3502107950760236 0.5467441995717425  
0.8148025642661088 0.4482740882824930 0.0469510730892070  
0.5762299597557862 0.9496789329042212 0.1487470211554852  
0.3220966289513637 0.8538850942978287 0.6540214813307904  
0.2675282807567527 0.4324846512107099 0.4240208772669919  
0.6311729970481113 0.3634653574936955 0.9315886591954338

0.7660461639594477 0.8655218332791891 0.2617390141685321  
0.1332558878875015 0.9331157368557476 0.7702170640469860  
0.1266255377133350 0.3650837402729908 0.7743793989963916  
0.7657087234690376 0.4313894631955487 0.2660035674361096  
0.6244939367533640 0.9374954234055171 0.9207937185791136  
0.2696110390168392 0.8630188651898018 0.4358272113678504  
0.4058070267133542 0.4671278467332199 0.3212176906139647  
0.4995844731886760 0.3176119218617023 0.8261049734388116  
0.8979307530436018 0.8275677482920983 0.3758692621765066  
-0.0000347091204705 0.9724839216797377 0.8806271713379800  
0.9958950666747869 0.3256580780519960 0.8839705240383163  
0.8982928017174286 0.4707627207372787 0.3765054964612419  
0.4916403248287083 0.9582888387670933 0.8155027201434394  
0.4003367854862631 0.8273879048091504 0.3212211281979254  
0.6248368992687562 0.2254562531473782 0.2866954621915801  
0.1188590205862327 0.0713300607865149 0.4077789427386136  
0.7763611278491672 0.7281102159251671 0.9157655300050234  
0.7726787560787919 0.5720608561705981 0.9149084570311100  
0.1281224976080417 0.2265955133454092 0.4128517713833411  
0.2725652441814602 0.7267300634762437 0.7830755937275177  
0.6192223736184772 0.0722480689688636 0.2879292802416695  
0.5228021823960665 0.2722491225903328 0.4473092385011526  
0.3762865254565064 0.5197078941864981 0.9476170740521513  
0.0140123769868886 0.0189204131202312 0.2578130293562125  
0.8798499725111435 0.7775208716936591 0.7602069850154155  
0.8770633848139275 0.5232017246533435 0.7605279742887171  
0.0254163419296164 0.2785315312278112 0.2624219474371958  
0.3626056671705486 0.7748532259871402 0.9435893665240082  
0.5183812576239785 0.0223752114930435 0.4388264946116611  
0.4831312068299042 0.2185542773791679 0.6542772504976251  
0.4203704825098031 0.5675669167529217 0.1499295659183005  
0.9779682427990306 0.0708804248484358 0.0526533160505241  
0.9081062906901228 0.7266225032649640 0.5481383509517826  
0.9077089766125469 0.5729298296026764 0.5482791316513694  
0.9778712730777882 0.2267474450160731 0.0603842034610907  
0.4165277937315195 0.7263241817641672 0.1444073250181751  
0.4680540815348173 0.0634690625958653 0.6427682129068292  
0.3253430223587881 0.2354242874036479 0.6308374326942897  
0.5761401588734396 0.5687476568653687 0.1338997655035728  
0.8190403154005608 0.0711893686816707 0.0678036750913036  
0.0678577500791514 0.7269264086355443 0.5666839835182979  
0.0674067346050786 0.5716336832249650 0.5660762387967546  
0.8204615203605741 0.2280897486015402 0.0670925747116392  
0.5728416798819739 0.7276787056862785 0.1298461131170774  
0.3137844077525992 0.0794803916672257 0.625117931130411  
0.2719702181449314 0.2791975145928758 0.4191352371693244  
0.6262512172220893 0.5210473602829144 0.9255648064019790  
0.7666519275035957 0.0216171408403338 0.2802659409004464  
0.1241059221393438 0.7748544745973021 0.7753412597924177  
0.1201565478573435 0.5227670698795143 0.7745788367602282  
0.7697886891936434 0.2749643977043362 0.2744151431303948  
0.6267085097010872 0.7769627231808094 0.9231162085150446  
0.2650015666032376 0.0224100985044549 0.4194985561131302  
0.4034496387915149 0.2298794475112547 0.3087878734493789  
0.4929376701763314 0.5683051979040488 0.8177354836432285  
0.8965434795121422 0.0694591762744016 0.3919866903658667  
0.9974623876119727 0.7287839833384154 0.8937475348017750  
0.9953240128778834 0.5735112279084446 0.8930648478658341  
0.9023516621716167 0.2263845093274089 0.3897798733362747  
0.3973646627513173 0.0731639317501420 0.3093237006023397

Structure 2xH2O/22 S=8/2

1.0000000000000000  
20.1473052208877697 0.0000000000000000 0.0000000000000000  
0.0000000000000000 19.7681594983396742 0.0000000000000000  
0.0000000000000000 0.0000000000000000 13.2309279702280254  
Al Fe H O Si  
2 2 10 200 94  
Direct  
0.2745694777022027 0.5677954030549421 0.7953209298567699  
0.4968928750045774 0.7274474980220094 0.8090569989793230  
0.3359000660017781 0.6193073706806185 0.6085541470117790  
0.4669520412760323 0.6687622163022950 0.6016932313455922  
0.5485687456910369 0.6879247000592369 0.3120107602368484  
0.3892334950061144 0.6701760006672518 0.3103585854909681  
0.4152935485209573 0.6916911153430190 0.4191984534075371  
0.5075055960403834 0.6386075983063700 0.3764760555780157  
0.1997366097175607 0.6419673895341462 0.6434753913260836  
0.2031553886083867 0.6520811000320712 0.5264688167815255  
0.5927574100915424 0.6559082768681205 0.6723999912596667  
0.5916353900031754 0.6818677537742472 0.5602038633051128  
0.2767161329591002 0.5771882755215401 0.4422771888914441  
0.3452184423771065 0.6285783010950514 0.4189667657849935  
0.7071364996148026 0.4721756214226472 0.3187515132807097  
0.1954266024016297 0.3269376603559340 0.8129796037651750  
0.2064646612591500 0.8206444854066072 0.3941596074796980  
0.6956289584611229 0.9703609421731290 0.8789283749239912  
0.6942871346308512 0.3251406344435069 0.8865550450284423  
0.2071320597820177 0.4849645503741771 0.3994675109792542  
0.2016682375110156 0.9710094762853096 0.8074048502149539  
0.7035882957847901 0.8220826975491133 0.3009114945796181  
0.5909433318294488 0.4693844358134617 0.4128436660110943

0.3068923830185007 0.3429351276671974 0.9131385176525681  
0.0927778387322867 0.8283395174352527 0.2966328262649254  
0.8138517917478880 0.9745436233040116 0.7930339970803890  
0.8073468527665724 0.3328447578628051 0.7892802890274581  
0.0966997451243438 0.4677137597026441 0.2924019386623347  
0.3171378352063163 0.9833286234404574 0.8979234708533342  
0.5899880182146707 0.8291328182982083 0.3966495356000943  
0.6063182644692061 0.5407237076837290 0.2440977534454252  
0.3052756996323680 0.2707186916970344 0.7422606053888232  
0.1038172139482485 0.7544757668538222 0.4657627574627874  
0.7902850985464517 0.0414297697657738 0.9640895501792195  
0.8022187227739095 0.2622693748756803 0.9593776525243074  
0.0967844792738654 0.5423668909089713 0.4607559666364277  
0.2935233018825323 0.0520195297666708 0.7329348774818505  
0.5976231451955624 0.7545752945366550 0.234533888027353  
0.6043198856044637 0.4061152137502807 0.2390235238826197  
0.2894856546933270 0.4056637811370702 0.7384606546521986  
0.1068217830455947 0.8898947041957291 0.4723690874977611  
0.7988449818099106 0.9064267293455164 0.9602304337860014  
0.7932816397515435 0.3972569897381253 0.9619635183965569  
0.1086944071108073 0.4077923217376372 0.4706700171036661  
0.3097004046060923 0.9193899873676553 0.7186066433035092  
0.6034456812713336 0.8886994476672431 0.2148927724124800  
0.5269080811763559 0.4477168040190770 0.5824557525563747  
0.3813141030761832 0.3517377360529100 0.0764901380860822  
0.0213178246713546 0.8539650508584776 0.1340050351503366  
0.8779946742941546 0.9382772115871555 0.6295333588371874  
0.8790277093775465 0.3615976453584976 0.6301034616674168  
0.0183016600778978 0.4474056350550250 0.1339767131239310  
0.3721959024297636 0.9460652334609772 0.0725204775350978  
0.5291648006659047 0.8650320574046372 0.5647956044049067  
0.5213141660366472 0.3553126214485982 0.4348446064051741  
0.3955410715774708 0.4443016786730484 0.9325007952827256  
0.0167623828517349 0.9392256598782266 0.2905338222761752  
0.8793466359250153 0.8569650690844405 0.7910405388622072  
0.8815161389031508 0.4447308521084637 0.7901120441447155  
0.0184048771984475 0.3591413720800173 0.2878041786204282  
0.3518210281128270 0.8578865297425929 0.9237893877041728  
0.5283350958130372 0.9460701226020061 0.4013931603516609  
0.4580546386821212 0.4708694550163937 0.4161385486480048  
0.4345388005830453 0.3189461127817002 0.8984517899068755  
0.9628965503969187 0.8177192383064669 0.3069006363089954  
0.9461220461197472 0.9717205967106495 0.7931171667227879  
0.9384642703369503 0.3253563837683269 0.8006439534005863  
0.9676713954582780 0.4815510473660026 0.3133282628750606  
0.4458041975421612 0.9523316969892088 0.9107687501845471  
0.4572105124053458 0.8350625501311875 0.4057424626480138  
0.4780177766416185 0.50923041328866573 0.7446935682542367  
0.4304629771003245 0.2787366696051882 0.2244236412759814  
0.9759432159872375 0.7761615314168361 0.9878831737765345  
0.9195509659298949 0.0241379693498015 0.4901521713515074  
0.9142907391548537 0.2743314080115683 0.4895478208476015  
0.9754040279438609 0.5250216233727345 0.9851280802053730  
0.4157995499993385 0.0368655679795761 0.2014972405632929  
0.4972924597945547 0.7631611839827673 0.6853128707864045  
0.4007553685312754 0.4291925227843906 0.6349648531186588  
0.5106721705430448 0.3569718464320105 0.1168108638414885  
0.8945674624108909 0.8616986990904155 0.0810985320440475  
0.0035365074398079 0.9366423786589576 0.5713458328386757  
0.0036800192475724 0.3597229879143479 0.5674918857097291  
0.8919823766511036 0.4409286484748454 0.0776447018465455  
0.5000830492405686 0.9453597732936011 0.1245759381393486  
0.4034826369730424 0.8521992933887500 0.6248529994078150  
0.4985298533807955 0.3781986883364490 0.7451327310659577  
0.4263687914996533 0.4128146200065650 0.2420164596831278  
0.9883130818860545 0.9081979551798588 0.9582500477632000  
0.9066974130023352 0.8937272388087549 0.4481829149709886  
0.9067277055938936 0.4053362752947951 0.4487157541630568  
0.9877418892784293 0.3922397746909788 0.9587085875364860  
0.4073042847643663 0.9098296455727081 0.2570026788840887  
0.4976295903508918 0.8882150122904979 0.7543941172589010  
0.3172992621979001 0.5303434805471853 0.6882623786763777  
0.6024127749822065 0.2766701645257246 0.1966805479944968  
0.8063194033420197 0.7757803169495091 0.0057521054056667  
0.0940286575362526 0.0226314206029210 0.4977207029199606  
0.0975680580070472 0.2752394525271141 0.5039569991894851  
0.7996887452810696 0.5267063837429582 0.0116159639991103  
0.5933536257519597 0.0226799115416210 0.2057109042394391  
0.3025442784652252 0.7853853381891106 0.7145181997075610  
0.283171058552006 0.4415645282427688 0.5472350286258445  
0.6351875094572295 0.3642867791119730 0.0547906013484062  
0.7682217197891364 0.8673422746899021 0.1409528975099612  
0.1245434020485971 0.9430299566354444 0.6511238021271748  
0.1231378333242510 0.3589033280258756 0.6533477905094782  
0.7668060349429764 0.4340460383446857 0.1471054613957196  
0.6201562959750607 0.9521874766558963 0.0414799583890295  
0.2827534037372595 0.8548751273086710 0.5482775336074860  
0.3316568992582282 0.4561374971292787 0.3609416423266168  
0.5651449485730923 0.3231925929927130 0.8978280411838773  
0.8335375681719698 0.8365683640580081 0.3051359833648443  
0.0742208965364579 0.9639269572062157 0.8331056057432340  
0.0671750716787695 0.3281150806754549 0.8291410015417459

0.8381183284355000 0.4640698908899078 0.3025827440389211  
0.5685947660942808 0.9770274811289663 0.8588453404081693  
0.3308791773973636 0.8292584398552502 0.3623565371946929  
0.2474930511243539 0.3574111318984497 0.3994907716092239  
0.6268170145466390 0.4420863124924621 0.8904535689057129  
0.7557313058964917 0.9449028499265895 0.3051217828539737  
0.1440476192507917 0.8520427062454725 0.7978279125211412  
0.1310541793102052 0.4443160189360019 0.8086298817536197  
0.7640221238277961 0.3529991358534234 0.3102339104104236  
0.6241858238685457 0.8582510242587558 0.8962890491536197  
0.2633808975392352 0.9427336714495593 0.4000847763730957  
0.4079083095375188 0.5446807443268950 0.2703548926822395  
0.5030780406428420 0.2461853439057051 0.7686633993069454  
0.8853556982056586 0.7597463243681526 0.4417478211511752  
0.9980883721425378 0.0428366130965002 0.9407330301096649  
0.9928233348579947 0.2568867573289661 0.9485411526964220  
0.8855451535955583 0.5396982537856898 0.4434061132819282  
0.4701835535911983 0.0216438057888482 0.7461866195311939  
0.4225870557137443 0.7760733010957755 0.2399759289539374  
0.7054671171806622 0.2331501842627034 0.308002282927173  
0.1903517278265494 0.5633908715230500 0.7755231651629443  
0.1973159905607870 0.0576395196315439 0.3789369067294983  
0.7030789343660612 0.7520181077777163 0.8820894096671543  
0.6931537707051626 0.5575952404420422 0.8971137760017387  
0.2085949466548636 0.2312323061277507 0.4117199475409767  
0.1928618246584216 0.7271712715546513 0.7820176534687812  
0.7007577264018072 0.0658528071538842 0.3060045686416635  
0.5884783611269478 0.2445872496863651 0.3929983560181389  
0.3051016706736634 0.5413208180786320 0.9091734129235723  
0.0787397855042093 0.0572484164409211 0.3035839141977951  
0.8232559101948518 0.7361068590499780 0.8142304484575199  
0.8110441461706357 0.5575843081866028 0.8158371520559961  
0.0969798263719132 0.2508085003966074 0.3070688478454076  
0.2978474908443252 0.7395093076943464 0.9036662650757681  
0.5855197787218193 0.0648363806893790 0.3983779367024605  
0.6075540322567525 0.1513840803030159 0.2501422386762203  
0.2987190963129464 0.6507783177561943 0.7557604016283717  
0.1081278716614994 0.1492818314385518 0.4413843276159412  
0.7794484919761545 0.6513080982481022 0.9530504075517389  
0.5307888969512223 0.2565424487624687 0.5719894809593777  
0.3750708030371864 0.5361936708332837 0.0786918147476064  
0.0166472041016025 0.0242300432598860 0.1352700237342210  
0.8757083418038319 0.7710898480999778 0.6390361597141072  
0.8683801072710979 0.5319847569300775 0.6406792679575830  
0.0246766516193535 0.2684737758370694 0.1411090387795830  
0.3758958528681654 0.7631213265490976 0.0588849978485172  
0.5153721647791191 0.0255632585893824 0.5594235765099623  
0.4561470751395219 0.2395887405335295 0.4114394958266201  
0.4356224914069722 0.5700902472526691 0.9107790552022413  
0.9472459015153677 0.0537659865975625 0.2980880210272206  
0.9538659530525376 0.7454212118003741 0.7944387538968024  
0.9426831948688580 0.5632407542578139 0.7983037723360324  
0.9654350193940747 0.2377798269645606 0.3127537789514253  
0.4295867304412898 0.7541340763405803 0.8763794280137907  
0.4538213564734043 0.0577798857258312 0.3910968420258512  
0.4998705457643266 0.1391105515036085 0.6581982421315460  
0.4045912886502424 0.6545698563529598 0.1653475867608763  
0.0009397567533936 0.1483754448470866 0.0629306636446989  
0.8834997988044193 0.6505879867466119 0.5539188392261827  
0.4074049555844904 0.2350041206128431 0.6301959808785401  
0.4996935639442204 0.5610863776567703 0.1245216338249648  
0.8990760052534220 0.0634073106910565 0.0696665129445851  
0.9891321469229498 0.7320191015579302 0.5561965170435175  
0.9857751287179637 0.5655913483967927 0.5638136330876039  
0.9012085461858967 0.2361224013600847 0.0886207174944908  
0.5034142427566853 0.7332784079767468 0.0951039920682261  
0.3937254913535438 0.0698783812301607 0.6019302914681792  
0.2971648920581408 0.1610959365462171 0.6228494977717737  
0.6035985493652630 0.6461463805576271 0.1180489584762368  
0.7988522508596733 0.1517502912914207 0.0729649942512982  
0.0902020678970760 0.6469847797443308 0.5821922288128158  
0.2978408386368035 0.2824239168269188 0.5436039664836881  
0.6131847307164447 0.5219405415523254 0.0489228476794265  
0.7889599900251906 0.0327275642303073 0.1645344630102325  
0.0933319689378667 0.7684658593310995 0.6650034301913749  
0.0918489699356501 0.5223685397978596 0.6589889660680934  
0.7835995612155804 0.2721109304767059 0.1561017529822311  
0.6263379410245070 0.7683113249755347 0.0426466023781892  
0.2750583787332221 0.0411351167599010 0.5356434615695400  
0.3309215700318022 0.2579107293971555 0.3524506971062970  
0.5653919974286307 0.5616831571055170 0.8702810423739761  
0.8236217953808321 0.0546583770912823 0.3585313895061404  
0.0759221407380967 0.7452468644265339 0.8629790042054457  
0.0692355991760783 0.5585340801705887 0.8506702847490524  
0.8344685419936591 0.2404481259946984 0.3359638888345282  
0.5738737086996487 0.7351891443105776 0.8638065991664092  
0.3258738822886801 0.0556683866269481 0.3489182667839083  
0.4002883012362285 0.1557287152789474 0.2805545966274001  
0.4873050739436362 0.6429341767467619 0.7646834797901780  
0.9062594302368505 0.1481176225887301 0.4288367355430208  
0.9910533475907480 0.6516308400202361 0.9291734858690356  
0.4370518750101545 0.5895219838525328 0.5821427500552223

0.3848829258060477 0.6997840467020436 0.6122317370900783  
0.5193568674204010 0.6486058192852785 0.3063804315978688  
0.4835127739919520 0.6987046461211689 0.4870399527478417  
0.2302355921283773 0.6514217819650590 0.5874286186588544  
0.5736037299012334 0.6474983947627504 0.6056304320939133  
0.3740491870355149 0.6803093818976088 0.3792237048747358  
0.3208628316959609 0.5885272176983163 0.4673310388062988  
0.6270584560136205 0.4722198788682112 0.3029283472304599  
0.2748235748448997 0.3360386330015100 0.8008796775018717  
0.1269836713599068 0.8235781887365275 0.4079078112359710  
0.7743352638221013 0.9733220109072935 0.9003074519475354  
0.7739977506605955 0.3288077170801300 0.9010362959059470  
0.1266689900440044 0.4749879780192933 0.4062998842983065  
0.2804958513622296 0.9800682158226556 0.7885730990186961  
0.6237836475514437 0.8249861475151945 0.2851860558994835  
0.5245801038412482 0.4355533986273445 0.4613983150636444  
0.3795843166221146 0.3651889227502333 0.9554657583992956  
0.0232736010450241 0.8602718341066083 0.2559659088247155  
0.8792845739652954 0.9351872538116669 0.7517326804972707  
0.8767159976593446 0.3664837645614566 0.7518854480517991  
0.0248804268397481 0.4384122348974073 0.2551424788217717  
0.3719279596997001 0.9346632855526223 0.9511902324013950  
0.5260321116759742 0.8687237625055776 0.4429730388239697  
0.4760289057568032 0.4418925919146520 0.6771382299876534  
0.4367208389164884 0.3501234948834863 0.1654523437141633  
0.9699536918311111 0.8502452148187842 0.0396063852655755  
0.9273616469666499 0.9480660920102615 0.5340341649600328  
0.9266689980079207 0.3499304653589405 0.5332283494269454  
0.9680183852189861 0.4513220056653095 0.0379651795315323  
0.4245997602172648 0.9593577654061453 0.1632122776059464  
0.4807220329221748 0.8414975884136210 0.6567634298774070  
0.3239393155507729 0.4511726723032638 0.6512769489569293  
0.5879781563324572 0.3513920736324561 0.1518500321225002  
0.8173469450922226 0.8522948340424458 0.0468535816718105  
0.0819106802704948 0.9487282104726165 0.5480942986425305  
0.0828504301990018 0.3502739002681540 0.5487052068782400  
0.8134845567832302 0.4499020197134694 0.0501457199494688  
0.5791271790212790 0.9522966859895233 0.1467327579549884  
0.3250632222192126 0.8520380206580291 0.6523908987667610  
0.2687594218827873 0.4343152123348051 0.4275551506606914  
0.6301939306458763 0.3645615429142950 0.9321496640232568  
0.7654760774480458 0.8683330873969423 0.2633354087354051  
0.1354938191871994 0.9319458637164142 0.7714175256457279  
0.1287972643511166 0.3654064883887537 0.7753489788808412  
0.7686426507578504 0.4304763609647320 0.2697490939267188  
0.6268652124175221 0.9383813466142089 0.9205346922495921  
0.2718938057965848 0.8630702198934925 0.4275078971577617  
0.4062372041341259 0.4705625154096049 0.3228032463074230  
0.5000228622068114 0.3178891837688183 0.8276245846463423  
0.8973973722740552 0.8279855200021243 0.3765434408716915  
0.0015327592459376 0.9708716579706148 0.8820004566679672  
0.9964202277616496 0.3269637483215542 0.8854946386088448  
0.8999311855456709 0.4718626518294870 0.3782926094240478  
0.4955014193477132 0.9593676374361122 0.8156301717377338  
0.4038929452289423 0.8376428487161471 0.3145042419994771  
0.6260251775388839 0.2273741145085643 0.2874256495253348  
0.1201271225053606 0.0712920395743216 0.4067129782597558  
0.7771409557994329 0.7292160580284303 0.9145757252498500  
0.7706844759851903 0.5728611565209089 0.9198746465483335  
0.1279783215623299 0.2270448106044729 0.4156689269110966  
0.2737702002505641 0.7268882046172789 0.7880504705798437  
0.6218538887867778 0.0750462467394139 0.2893474651184149  
0.5244589776054559 0.2742603487223175 0.4523694030843819  
0.3759461844373375 0.5230681222763510 0.9568993578011791  
0.0149982107184748 0.0184267955184919 0.2574981216746036  
0.8827568977480832 0.7775594908982898 0.7607066609876272  
0.8754974113817252 0.5244336373100332 0.7623448497123360  
0.0267974084078130 0.2790235302994941 0.2627113244241157  
0.3662647785123400 0.7776956989005481 0.93899073422339067  
0.5204707378055681 0.0240776658878972 0.4372341990736249  
0.4846748693605527 0.2193623762419080 0.6566552820673552  
0.4236144796876750 0.5744360592993510 0.1584893189285712  
0.9781724455605716 0.0702982832697775 0.0518483077217940  
0.9090146135634044 0.7279317453899870 0.5481005963090797  
0.9061573996921470 0.5722387176608815 0.5507573464569574  
0.9792696778026687 0.2271581542341972 0.0602911043773828  
0.4278751283016564 0.7315248943427481 0.1382800584433073  
0.4695673601965680 0.0642671589895829 0.6422485096914982  
0.3272638703064079 0.2368280394527737 0.6356962216944283  
0.5794823348022979 0.5687428226795974 0.1366848317153229  
0.8194318559467081 0.0725637389886108 0.0680271521800254  
0.0683566415431777 0.7260994356313333 0.5675809407206955  
0.0654057532665401 0.5687914173744921 0.5669421936498877  
0.8218926398834452 0.2302594458285500 0.0682728830832391  
0.5820522509087883 0.7249983375718294 0.1212986083605321  
0.3152194192750720 0.0809769465594831 0.6235501777915393  
0.2717066136999888 0.2810823519473336 0.4271567996184412  
0.6241132089054612 0.5207018566289497 0.9272348933855340  
0.7680814275392515 0.0247188246349940 0.2825169582306805  
0.1264367681797205 0.7733355198870557 0.7772017547930525  
0.1218576282365938 0.5227301245324414 0.7743867904745068  
0.7721463046845701 0.2742746081315671 0.2778986344932978

0.6302423608217960 0.7777534460100849 0.9195197454690626  
0.2664919297514176 0.0240165317208600 0.4161211582819651  
0.4042640101591219 0.2333135591289439 0.3178288811403471  
0.4915473771308447 0.5702567495109432 0.8223846753392163  
0.8990219041288684 0.0700149487552829 0.3936917536201642  
0.9993883743609880 0.7296613126706417 0.8937007123199017  
0.9950040965356790 0.5736878482985195 0.8910087191147705  
0.9047045009843819 0.2261142172590165 0.3915024638395083  
0.3986008460994441 0.0758830831613561 0.3061924283258495

Structure 22 S=8/2

1.0000000000000000  
20.1473052208877697 0.0000000000000000 0.0000000000000000  
0.0000000000000000 19.7681594983396742 0.0000000000000000  
0.0000000000000000 0.0000000000000000 13.2309279702280254

Al Fe H O Si  
2 2 6 198 94

Direct

0.2763061591835101 0.5691241305080091 0.7914117502263708  
0.4958289478555654 0.7279875430844968 0.8078178782571798  
0.3391051344546059 0.6235322703782225 0.6021935876955379  
0.4652245576860450 0.6731436350850469 0.5932613071787027  
0.2021256293087476 0.6379939270972202 0.6371193220244562  
0.2072685452539758 0.6570864982489267 0.5219639842644869  
0.5858784799835552 0.6540916959775466 0.6712904147894003  
0.5911513397506613 0.6745656320087481 0.5562046034006178  
0.2833960010873911 0.5782319669224302 0.4215762302352825  
0.3565137914911650 0.6003076712010439 0.3963343933202225  
0.7063405456790425 0.4733153894427171 0.3168014425824492  
0.1955425225555582 0.3270523059297869 0.8121983812839535  
0.2063718123048202 0.8212355874276409 0.3945236810309901  
0.6952324110160459 0.9712583251943485 0.8810589355864163  
0.6945513451665316 0.3249806599662244 0.8870322153462086  
0.2071255540103903 0.4851466160181345 0.3985853209834602  
0.2011092577029559 0.9717609230967668 0.8080293684024581  
0.7037222124247384 0.8214705570531788 0.3019363260831501  
0.5912712317920782 0.4687678907736628 0.4139829967194758  
0.3067707137191832 0.3427137221617454 0.9124445306909292  
0.0926571980560554 0.8281046708200284 0.2967977087242809  
0.8130272723732935 0.9739695035331040 0.7931430879590528  
0.8076285060614240 0.3326154994442060 0.7894570838572191  
0.0963829212884607 0.4681005316981335 0.2926099772210131  
0.3167468694402440 0.9838847747819763 0.8989147498517921  
0.5909381266649848 0.8307988665561684 0.3988242263128263  
0.6037958328976428 0.5428268659180148 0.2475839891051265  
0.3052822136671490 0.2712552006155822 0.7412026251705280  
0.1043308368405283 0.7545720880952684 0.4662801828447749  
0.7911614005616018 0.0415986264452450 0.9639749545816245  
0.8024751146024547 0.2620646958769524 0.9596912675203935  
0.0965536825791228 0.5425469506512338 0.4608291467876067  
0.2930440042198376 0.0530537875253020 0.7340336873643653  
0.5972212537451347 0.7544801410491561 0.2366749126363590  
0.6027336681388075 0.4083153511189908 0.2375288731697216  
0.2895719916015327 0.4065760673121987 0.7384961748602558  
0.1062681350398701 0.8900903997639873 0.4721907354149517  
0.7986123394414711 0.9065106235881580 0.9609484213025755  
0.7936230972464877 0.3970781532743628 0.9620913929204353  
0.1094664034528833 0.4078647796021408 0.4705448571840819  
0.3092828947692062 0.9206385468555648 0.7193776193450065  
0.6040348220301451 0.88857992080555345 0.2164874158136899  
0.5265168523081255 0.4481890349829922 0.5829955120461378  
0.3808510484453729 0.3509404454328391 0.0759585118589779  
0.0211995329958095 0.8540070488848179 0.1342481950984848  
0.8777943705697360 0.9385037761817672 0.6299894826273439  
0.8793740441050678 0.3616632676202198 0.6302506142814702  
0.0186532811097067 0.4469455725652042 0.1340806004398758  
0.3716959565599567 0.9466482210547664 0.0733328640377468  
0.5292117440595778 0.8669272096187112 0.5659462921473289  
0.5217804674990677 0.3546449871256502 0.4363938987799962  
0.3952825758970033 0.4438993451449875 0.9320826035961786  
0.0169908338930231 0.9392389412166414 0.2907902287192348  
0.8797434082846878 0.8569943947551906 0.7913556936354270  
0.8815855955076662 0.4446344149507540 0.7903942541606838  
0.0189983026363439 0.3589653503699476 0.2884749489175320  
0.3501830496885711 0.8579656040575010 0.9255564302361471  
0.5281985260317992 0.9473700816177383 0.4016450701155745  
0.4584346502814298 0.4696434085346076 0.4151588148935385  
0.4346375435609809 0.3187372374568537 0.8985542382432129  
0.9627814011743084 0.8178754007451392 0.3071682200924289  
0.9453424722176009 0.9723502277558725 0.7940988180466156  
0.9387716019718942 0.3253093186615687 0.8006337084022493  
0.9670739294409048 0.4809404055873150 0.3127102428006156  
0.445155522237917 0.9515214503647503 0.9113820401545619  
0.4580008099714139 0.8361273999683555 0.4070751389346895  
0.4768445586199616 0.5105825699822194 0.7442210212344711  
0.4310664934707967 0.2788924366317367 0.2246467685140973  
0.9765128515252051 0.7762547099879388 0.9878595827802777  
0.9193830797231413 0.0242557626507616 0.4903903788470028  
0.9146609922334619 0.2738903767400145 0.4903370840140210  
0.9760787172288200 0.5250587237905677 0.9856445519709234  
0.4158252042953116 0.0347363481637829 0.2049422435681235  
0.4953866255038080 0.7629535723567561 0.6825986266245760

0.4005040536197838 0.4294768494047479 0.6346099998041305  
0.5102749866035914 0.3573529931403537 0.1163496950824068  
0.8944179171794047 0.8613171224989737 0.0813685307590088  
0.0033421527964478 0.9368140892992844 0.5722648805351168  
0.0039106292196809 0.3600041259568630 0.5664528990505018  
0.8923812128867726 0.4407262170702944 0.0779738606832084  
0.4994626893737065 0.9435364623422343 0.1271236388263236  
0.4032309805097906 0.8548632412924546 0.6248306457221444  
0.4982852525935038 0.3794167010562117 0.7462094086598606  
0.4245497833354122 0.4130889316710373 0.2403881094236149  
0.9878418630770168 0.9084224574098811 0.9587941860006671  
0.9067979636630924 0.8938153172197469 0.4487213628071680  
0.9062415215789786 0.4046742098079434 0.4482241898515621  
0.9878503872952845 0.3923792315495692 0.9585944820627245  
0.4050985178591710 0.9061296760054528 0.2561227613769224  
0.4977706299416915 0.8866310039601885 0.7563320079366777  
0.3172177534474222 0.5317670305941675 0.6834072044593885  
0.6021074109340098 0.2779597295881809 0.1985223677029491  
0.8060904343094939 0.7757875970327590 0.0060070122261337  
0.0938160973126480 0.0226865388343723 0.4988869681220438  
0.0981685496404529 0.2753464525690568 0.5039134362072344  
0.8005935725409798 0.5266127696823608 0.0116314014940232  
0.5920355641300007 0.0226395117163140 0.2065880823651508  
0.3039347825220548 0.7867143206897979 0.7169836041714858  
0.2826485573343289 0.4412969393196676 0.5470852232140206  
0.6352038092300917 0.3641472096995795 0.0551973364623234  
0.7680229525030849 0.8670265054975885 0.1415467674855410  
0.1247161360014876 0.9423205506216149 0.6513227169804531  
0.1229867807194899 0.3592864089147290 0.6533019724209633  
0.7670187849612075 0.4342489385569875 0.1468470701741961  
0.6192606397950540 0.9522687656030713 0.0429639667271978  
0.2811287094091445 0.8548849266104912 0.5508684205847534  
0.3315525503816562 0.4588073020834875 0.3638795576725532  
0.5652751669375717 0.3236779262581632 0.8978961665028695  
0.8334856108603262 0.8368461577586161 0.3057479021488665  
0.0735987587676908 0.9630313837275664 0.8325759925386178  
0.0674665017809192 0.3287008699572023 0.8293399559291478  
0.8372293549301660 0.4645460213006821 0.3038036344447520  
0.5682148339397909 0.9762088579194095 0.8600284772990316  
0.3313874033408796 0.8260692220751553 0.3681751200093913  
0.2483075184019407 0.3573567030008937 0.3977593195767407  
0.6275471774250639 0.4421920343950243 0.8912582383200492  
0.7552075345250781 0.9447809925022078 0.3051622116092033  
0.1449688703600003 0.8519080358459232 0.7985502167474524  
0.1320589942184352 0.4448022006978428 0.8085364913028804  
0.7626842767973333 0.3535378747450880 0.3098608744189355  
0.6255325136076946 0.8581639620623508 0.898377846746136  
0.265898894969243 0.9420931923377949 0.4005082364243133  
0.4058814776352868 0.5456117030438155 0.2733512370773288  
0.5033823385958112 0.2469938309242437 0.7685499627856787  
0.8856052739301691 0.7598446890729651 0.4421945630163494  
0.9988281538170607 0.0428535693437409 0.9410770164219154  
0.9931402152969809 0.2570777743479687 0.9487145273785064  
0.8864796019839348 0.5393992169048358 0.4442113972517591  
0.4699923234372503 0.0199617264430433 0.7462051134397065  
0.4202362100647585 0.7710695399378302 0.2468734483329311  
0.7055703959016447 0.2331306761304933 0.3077412284123969  
0.1914764980100463 0.5642039899584012 0.7757024205801453  
0.1971802595022074 0.0556668889856126 0.3794131884543436  
0.7023908427812177 0.7506608611319671 0.8836638152686146  
0.6932267197165231 0.5579548859636018 0.8998779423497641  
0.2089587399418878 0.2313405049839795 0.4110017546897607  
0.1940010876627350 0.7271953016038387 0.7810270307676878  
0.7006004022664631 0.0659441671305875 0.3042510235903916  
0.5887896002721653 0.2439082662807071 0.3935905358833652  
0.3067443614928145 0.5425258420379434 0.9058116635104663  
0.0783947738497206 0.0574908349553655 0.3047220588999460  
0.8228626520264246 0.7365719955815996 0.8144294334338437  
0.8106208621464009 0.5571520989361584 0.8157244273542973  
0.0969117256382429 0.2501386885493582 0.3072999221557129  
0.2986062970035687 0.7382792314104073 0.9044039661971051  
0.5858405065872877 0.0660611839577633 0.3985563893777722  
0.6075720394410219 0.1517320012258744 0.2490492255002155  
0.3007758805245330 0.6520322688863043 0.7518088850708569  
0.1093084763520945 0.1490012895035458 0.4422043722747598  
0.7805059687170907 0.6511915901003134 0.9533463068684872  
0.5310749646658887 0.2550542826705242 0.5721896604315715  
0.3740811201081686 0.5337527062862916 0.0793687233685593  
0.0170019312172506 0.0244545212063436 0.1357981317928359  
0.8759227688320966 0.7709647249030308 0.6394970253203841  
0.868775256149740 0.5320857206895029 0.6411519794002368  
0.0247487770450160 0.2686166862293012 0.1414067571018125  
0.3754530058050504 0.7643902193322701 0.0613658884688484  
0.5161233015270069 0.0266351992234331 0.5601722311153496  
0.4563819921636470 0.2391667387668388 0.4112505863972219  
0.4373435582326059 0.5692979186269009 0.9141668851503343  
0.9469214416950933 0.0534643354853886 0.2981700158003132  
0.9538750042306570 0.7451957751079388 0.7949498051392893  
0.9425915786915479 0.5631905777346912 0.7993744799750255  
0.9653101332049790 0.2378601035887848 0.3129585782126664  
0.4298107086998964 0.7555802966940074 0.8778567815999443  
0.4540520559069088 0.0595030646374437 0.3930760529137538



0.4989740599620891 0.1386965944604862 0.6615884902480256  
0.4042965934184954 0.6531251313846217 0.1619180489510969  
0.0017012304975400 0.1485188079649822 0.0629065414374011  
0.8840026081652939 0.6505789419796180 0.5539523829143640  
0.4075730786940994 0.2351668538929837 0.6300851933784120  
0.4984526472857980 0.5597593629902460 0.1309079220510307  
0.8996360205242407 0.0639822699520234 0.0697743705961536  
0.9894972280975621 0.7322055314016044 0.5566988027625888  
0.9864127908244652 0.5659983187237709 0.5654144844269480  
0.9015013631599941 0.2357664881115058 0.0887189793137324  
0.5019536348738408 0.7341206998529520 0.0993646263292311  
0.3935905214694014 0.0692282635231072 0.6028099738088042  
0.2974506642438735 0.1612110681722699 0.6219651462456490  
0.6007010577469145 0.6459659077453399 0.1208652500256662  
0.7989062520841743 0.1516695225694752 0.0738344957387948  
0.0910041445201720 0.6473774049100232 0.5827740093447301  
0.2982278118331678 0.2825890794000588 0.5427281746554535  
0.6117985034692371 0.5216205459583700 0.0497051840929463  
0.7896718489368189 0.0322317490014029 0.1644574817601847  
0.0939265000674524 0.7688537831264367 0.6652730484976163  
0.0930475921387571 0.5227198781939163 0.6590909593141427  
0.7840423010004350 0.2723779664977055 0.1563356945353693  
0.6245061948984986 0.7669060896233225 0.0429490424476193  
0.2747231914210614 0.0407115175318910 0.536775719469863  
0.3313900969957922 0.2578559760892594 0.3516749528326477  
0.5657904023049959 0.5613981801379281 0.8694402447155896  
0.8232162041420804 0.0543592505063650 0.3587231508056456  
0.0765013149525013 0.7449802218350960 0.8627049872768896  
0.0696924327440918 0.5585908898574324 0.8504524451898999  
0.8344092229412629 0.2417425295770211 0.3367826318960763  
0.5731896012995886 0.7366880010529256 0.8613977849316108  
0.3258813550760503 0.0566667330572448 0.3508534382202438  
0.4005168824072175 0.1554760449434909 0.2793859291127506  
0.4863482065423425 0.6434275107811267 0.7658436535227869  
0.9056736994363905 0.1480811984012820 0.4282580682879913  
0.9916840488910895 0.6516210112203280 0.9294553407005768  
0.4308139034497612 0.5930506909044877 0.5778485597720400  
0.3838954724054334 0.7063788483983076 0.6025599381162106  
0.4848260508943623 0.699835326223639 0.4801525020694452  
0.2331165554437945 0.6433178692001703 0.5805732004487257  
0.5679148834433304 0.6451809471692487 0.6039074180558348  
0.3195470044115511 0.6078481518902865 0.4433282558513531  
0.6261719349164215 0.4732447470096519 0.3033836229549481  
0.2748499500487365 0.3365134282673010 0.8000036317728682  
0.1268721692481996 0.8237872562626073 0.4080614507854142  
0.7741191638702422 0.9733995264723208 0.9009806279664020  
0.7743225247638318 0.3285857846134850 0.9012579301829374  
0.1265349812635519 0.4753827480982477 0.4063220288547816  
0.2800050329570968 0.9810182800791027 0.7896455451636731  
0.6237098262952704 0.8243937938763014 0.2869402511953182  
0.5248569297099203 0.4349445035031844 0.4623289176091214  
0.3793630659574975 0.3648429426583342 0.9549527920481559  
0.0232048565682724 0.8602706521703142 0.2561795672643786  
0.8789202652668313 0.9352425079089510 0.7521958826307807  
0.8769552735048848 0.3664176174265477 0.7520492334248431  
0.0248353897675487 0.4381823649467008 0.2552781589441086  
0.3711585786057225 0.9346805891814882 0.9521952293135114  
0.5266371353797662 0.8700498568088274 0.4438706497887320  
0.4754796716218201 0.4428035508538913 0.6776888940585132  
0.4363407985799298 0.3498567169601143 0.1646090894695044  
0.9698248835048885 0.8501939970155640 0.0398562468008254  
0.9272207729807572 0.9482260679677703 0.5345666683739747  
0.9267740165450640 0.3497516975496948 0.5331664690349189  
0.9683796920565103 0.4513038039017038 0.0381417109534701  
0.4238215826211305 0.9574637086631402 0.1650993704210546  
0.4802884085164515 0.8422407510316480 0.6564800287697453  
0.3237392474649833 0.4520634822276238 0.6508290723397581  
0.5875542010480789 0.3521002786046472 0.1519415047510936  
0.8170902739882729 0.8522100410922935 0.0473854742318495  
0.0817120743736819 0.9486171708363722 0.5487441461314703  
0.0831250621436643 0.3504153951695478 0.5484121875895964  
0.8139777175250491 0.4497795918939257 0.0500927206118822  
0.5785479372636166 0.9516328391008269 0.1485239087821937  
0.3249902917742705 0.8532417285857824 0.6536412683462889  
0.2681224800574611 0.4341150146441616 0.4277513428780985  
0.6305307111015064 0.3645550161659299 0.9324808858473143  
0.7651059190494494 0.8680306023647540 0.2639646361776938  
0.1355383114274786 0.9316897868160284 0.7717678955959197  
0.1290069789278833 0.3659398619657452 0.77523989868653665  
0.7680729206810858 0.4309946617112053 0.2694587876502741  
0.6267539048113742 0.9382888099080626 0.9222577768162750  
0.2721602973337438 0.8624487087640589 0.4296191185781132  
0.4061343067588034 0.4699207900870870 0.3228170666226623  
0.5001148012900118 0.3185189790668587 0.8277137494040315  
0.8973425003399970 0.8281418059948774 0.3769691711444284  
0.0012497908493419 0.9708577707095318 0.8822521817312293  
0.9966921639090597 0.3271009119024760 0.8855534633384018  
0.8996728459226531 0.4715979062681642 0.3785557347425067  
0.4952614154676097 0.9581896920814335 0.8167201612892749  
0.4036917935024316 0.8351564515568685 0.3175649387894119  
0.6260959135273402 0.2274334897629355 0.2875679602644370  
0.1202937168949405 0.0708227294622942 0.4075546303471938

0.7769496961311774 0.7291224852506332 0.9149949691994400  
0.7710972763905599 0.5728688478070640 0.920413527773319  
0.1283507905969653 0.2268302910962721 0.4157884609416921  
0.2750251110387818 0.7270287264758407 0.7880839426310167  
0.6216035096511924 0.0753232852438502 0.2888133903653416  
0.5247272992709878 0.2734149155130738 0.4529068354147721  
0.3762058594052028 0.5227657529378611 0.9566048619911960  
0.0149590685695183 0.0184596950394880 0.2579890161852310  
0.8828108725763358 0.7775397537145590 0.7611937002902522  
0.8755468223516969 0.5243842731742815 0.7628301338945765  
0.0268807303373807 0.2788372343807777 0.2630450463292321  
0.3661397302382543 0.7779618035806027 0.9408790593405275  
0.5208940563319964 0.0252938201465774 0.4379594205418761  
0.4845945985973681 0.2189960869996949 0.6574519498160861  
0.4213469037005902 0.5735583473808454 0.1590915065082794  
0.9787585425894644 0.0704552546367980 0.0520527135419239  
0.909332537771299 0.7280116139043545 0.5484710798204009  
0.9068358293936313 0.5722870426946544 0.5514422944612146  
0.9796042603691546 0.2271639025976125 0.0603801369505080  
0.4260782004825873 0.7308189278040398 0.1413479551856741  
0.4694296615641101 0.0637425789514847 0.6434126645869968  
0.3274277949410048 0.2369636100437360 0.6350675486162666  
0.5783692969489643 0.5681767254096517 0.1373720152790919  
0.8199348273587335 0.0725511458339285 0.0682474103578469  
0.0687175873238099 0.7263363223056578 0.5681386268560706  
0.0661123092754931 0.5692151204231038 0.5675304745213164  
0.8221400515453559 0.2301094378959005 0.0686729035225591  
0.5806162418751972 0.7254506809638173 0.1244922330699578  
0.3151141956373603 0.0809430951965454 0.6241461605602934  
0.2721710125974569 0.2809262020890306 0.4263436200079456  
0.6240298071481244 0.5207792536017497 0.9277659641024143  
0.7679236164376608 0.0244290932076510 0.2821604250490496  
0.1273515098731459 0.7732100228980935 0.7773757146146626  
0.1230446272421955 0.5233621801279819 0.7745487351326165  
0.7720081192149629 0.2747816608509523 0.2779876247010548  
0.6295593490429807 0.7773244537650884 0.9201764196748511  
0.2668882902508210 0.0234211336797523 0.4171480516659337  
0.4046912008963975 0.2329030568974503 0.3174171539534476  
0.4914676144462004 0.5710462937517001 0.8229321862787110  
0.8986356834774507 0.0698254236266855 0.3936712946460456  
0.9999054512265354 0.7296392455671210 0.8937710691683702  
0.9955266714793721 0.5736721058860128 0.8913056672600019  
0.9045931506027973 0.2262209645442080 0.3917600478861075  
0.3987383547351055 0.0758646780252053 0.3076035858228775

Structure 2xH2O/26 S=8/2

1.0000000000000000  
20.1473052208878016 0.0000000000000000 0.0000000000000000  
0.0000000000000000 19.7681594983396991 0.0000000000000000  
0.0000000000000000 0.0000000000000000 13.2309279702280005  
Al Fe H O Si  
2 2 10 200 94  
Direct  
0.2700178171247325 0.5719925207869230 0.7968879538976192  
0.5000239563749145 0.7290302790717661 0.8048423037029810  
0.3240989009678934 0.6176399405394782 0.5997543102301855  
0.4482047101971535 0.6843478912693561 0.5791280609099474  
0.6024090982078598 0.6896273892008984 0.3457182778965972  
0.3628556488966483 0.6570993985827861 0.2854697854487466  
0.4243766552143638 0.6880304215229112 0.3943262641823448  
0.5085259129090274 0.6728741630332249 0.4076844706607610  
0.1895894507983146 0.6497582976054322 0.5948247867861113  
0.2224551742719142 0.6384163547520432 0.4882772159122835  
0.5521321721753640 0.6374312353197765 0.6587829259499386  
0.5753800210300366 0.6501406739241931 0.5392596633782740  
0.5947597088888309 0.6112763352308652 0.3508115455361988  
0.3430399729551198 0.6343132674390581 0.3964584293362012  
0.7033583615379082 0.4722592588204792 0.3192665871145016  
0.1940079602941859 0.3234638426733096 0.8147568616186015  
0.2045108374679435 0.8192829316849991 0.3890202317419377  
0.6970676878111727 0.9870092576777085 0.8880522164990340  
0.6960890155555287 0.3168151515217243 0.8959534143365619  
0.2047920687833067 0.4848538844317773 0.4029177250982340  
0.1991578604444353 0.9724629737311292 0.8101536922940922  
0.7012140111645799 0.8256825829665646 0.3007510086387605  
0.5879461814891194 0.4694919128428401 0.4159889771240517  
0.3068116401023901 0.3406931373631091 0.9115630576702958  
0.0900461981275728 0.8265112348671253 0.2960526650899296  
0.8104752763969876 0.9728120148106271 0.7887980472552358  
0.8057218710042563 0.3340023860880832 0.7910229022118174  
0.0941078128716292 0.4707803057071105 0.2960460042984027  
0.3187560013743491 0.9783282018341123 0.8905225081073823  
0.5854308689010921 0.8280212021813483 0.3908395076872985  
0.6021304745078417 0.5460119528055634 0.2557506209802137  
0.3022316648587581 0.2635592104217258 0.7448698398625258  
0.1027738637649855 0.7544146670590691 0.4662177608513541  
0.8045130079655610 0.0453226673424473 0.9581996163652799  
0.8102914913791418 0.2634758378255297 0.9608677939659895  
0.0949763536544873 0.5422662450416972 0.4671189481727033  
0.2912620917502702 0.0522903892252626 0.7325475033357804  
0.6004604286976458 0.7535693833488062 0.2317057319915038  
0.5976656625948105 0.4119887633755833 0.2354924529742795

0.2887770190425870 0.3979771234086165 0.7332568992704379  
0.1061793664428946 0.8895828141623484 0.4709638693946168  
0.7958131234258068 0.9108911268111942 0.9616610196849562  
0.7908576435644789 0.3971830342949677 0.9653653956637047  
0.1060986156245975 0.4074592001632752 0.4712990787484906  
0.3004328394592345 0.9194307595805240 0.7092554029939809  
0.6001583771179030 0.8883245154371974 0.2094734504478596  
0.5258821127826844 0.4473458834955896 0.5854807899682344  
0.3782873794866931 0.3577809583842038 0.0761377798580663  
0.0205381285168855 0.8563077693954744 0.1320739887070155  
0.8780730300274711 0.9365554916925830 0.6287927220756903  
0.8783557198528051 0.3610137217127818 0.6318301086407703  
0.0184421741678731 0.4467683043659996 0.1347337474705034  
0.3709819753157806 0.9478385162993794 0.0671634504611849  
0.5278831076922312 0.8612455570706178 0.5616941511587253  
0.5243509433116907 0.3530164544822836 0.4400981218255265  
0.3902067991588836 0.4471936721010238 0.9256525271663576  
0.0183697141257617 0.9395569246572553 0.2908012728736064  
0.8787345621445156 0.8566444439270124 0.7921983526887063  
0.8811735882384426 0.444499802927149 0.7917049495807140  
0.0196238829285470 0.3597266329817457 0.2902802011356317  
0.3530791418881796 0.8529361524480060 0.9257164900590305  
0.5302806897666259 0.9475075086899959 0.4037104271789641  
0.4548369577684684 0.4660991617248216 0.4211152212925525  
0.4358792226757660 0.3225604017656554 0.9039241791143060  
0.9599022314641927 0.8192353305020671 0.3012998719543363  
0.9423544290161220 0.9733085601246494 0.7944964729077808  
0.9367404132611017 0.3247410753998668 0.8036760287550173  
0.9640635593959592 0.4802825404634144 0.3099371489956828  
0.4474351511247381 0.9457776709617887 0.9084720809158359  
0.4529413315605650 0.8404885760233527 0.4035707197792106  
0.4884579947693143 0.5142767175581661 0.7456030655266205  
0.4261093781694820 0.2758277155606798 0.2173347876503029  
0.977128867762446 0.7763228792752315 0.9876888962208014  
0.9155392576629936 0.0238247371087263 0.4891915359321271  
0.9146566045870067 0.2737161337550925 0.4918125701116696  
0.9686726854536465 0.5269407721866665 0.9926447682297816  
0.4146040601475320 0.0371412585156018 0.2000711533597291  
0.4850027899444972 0.7598445322337740 0.6771595313091932  
0.4005053158739911 0.4373478047326677 0.6463339492777654  
0.5074549055726478 0.3566934227309355 0.1159036207556425  
0.8940481677801284 0.8630612254300669 0.0749961810752924  
0.0035111715491218 0.9391264817864546 0.5699551441928906  
0.0036214501238760 0.3581719362211210 0.5718687475770609  
0.8908466691248139 0.4376241962640949 0.0825101439844429  
0.4982995422527913 0.9469993637139666 0.1208052050250093  
0.4023890303382219 0.8616297966100009 0.6239439619519856  
0.4986008273725115 0.3815436254147001 0.7503547563078364  
0.4244107226868602 0.4076977132740272 0.2485858483680297  
0.9902453419282823 0.9077748824916884 0.9541967342035038  
0.9078759462815620 0.8931604775217931 0.4475967468554233  
0.9077859996763407 0.4047920676175948 0.4509485523592124  
0.9863092377866183 0.3951835584709619 0.9581028036389887  
0.4047013594195722 0.9091536455015452 0.2501963722832141  
0.5010889363207934 0.8826292992002293 0.7528662455491066  
0.3035762993121753 0.5268812971427843 0.6922287425296073  
0.5955172892036524 0.2797804650054730 0.2111027845698587  
0.8042750576832540 0.7786073513528625 0.9988753297064227  
0.0963396301932291 0.0225986669309181 0.4983635625463562  
0.0986756961223718 0.2749867998605179 0.5069333957964554  
0.8016834968904112 0.5264349560949136 0.0127492258402110  
0.5887735658197353 0.0231399582979522 0.2113531404550439  
0.3074972349050037 0.7866116147162132 0.7132957878215394  
0.2876842849765392 0.4389523645350725 0.5446825554290584  
0.6341352017879542 0.3572045918025274 0.0614202050448993  
0.768985366334298 0.8656190554115142 0.1407563225380907  
0.1247447660523645 0.9417001960766619 0.6505140111494432  
0.1241210303929601 0.3603293404910484 0.6543816663682919  
0.7661102300139203 0.4363289101046990 0.1505422044313692  
0.6194018000282226 0.9597347762264036 0.0438313836813269  
0.2833321443523804 0.8499223616719983 0.5410563855581650  
0.3290344825568269 0.4635137627255564 0.3556341122770563  
0.5666545383257316 0.3229370387450182 0.8977453951972014  
0.8306187154477331 0.8357640168934676 0.3095850582833036  
0.0711187247643461 0.9703738433720314 0.8279584939378702  
0.0656422823711396 0.3323103330949432 0.8282992200146995  
0.8339329108335624 0.4656279080447614 0.3124071653499114  
0.5710295952549390 0.9711743567966861 0.8572624473284869  
0.3286400131523748 0.8262578908740054 0.3519426890382676  
0.2507623455132853 0.3596207308611504 0.3968212345332018  
0.6372072373719758 0.4375820331938159 0.9017577403447972  
0.7565541276364744 0.9464945067203326 0.3016197002779540  
0.1375484356439329 0.8549631769059545 0.8034136860835016  
0.1373525119346707 0.4445613339671202 0.8099775375421817  
0.7610961484730800 0.3534782259984177 0.3111282205609132  
0.6476110380435902 0.8649298600976711 0.9083993003498769  
0.2633832787477607 0.9400342788187007 0.3965203919686536  
0.4172930631026642 0.5412307350880046 0.2679106907881395  
0.4998336366529523 0.2486608323055942 0.7706957511557985  
0.8876796815245163 0.7589548530161705 0.4408983688645971  
0.9940399984267456 0.0432160553960323 0.9430124618415838  
0.9945536646346176 0.2596557717223654 0.9511607961212868

0.8902945241839509 0.5399459014129826 0.4470258412182623  
0.4716982635367725 0.0156792659318292 0.7453587487170927  
0.4260452260815223 0.7760488368422593 0.2358461453739636  
0.7059095825259593 0.2327440965949982 0.3024344507420623  
0.1849368892467906 0.5702449418801444 0.7932601558422747  
0.1993031398384758 0.0566373370431192 0.3783810491960048  
0.7021768266245323 0.7460227583728081 0.8763676708005184  
0.6930335632618942 0.5589191029561750 0.9039509474466569  
0.2097432682845623 0.2338291429584989 0.4107285353582322  
0.1932498736484621 0.7339647080913924 0.7750295752447826  
0.7007882233485321 0.0669533917418817 0.2990449642503820  
0.5936815237198836 0.2421232418729169 0.4034753242602724  
0.3042908487112495 0.5500216547769595 0.9110430919962564  
0.0803623748459347 0.0581770443317691 0.3052716855950635  
0.8238839565075625 0.7346738283264196 0.8105983492769550  
0.8079362451653592 0.5556197787244976 0.8153272823465800  
0.0968002083411437 0.2503686344911406 0.3102167400543588  
0.2978380859574218 0.7356725660774867 0.8984840675103695  
0.5887248534776759 0.0657648692363885 0.4021658430288143  
0.6056584883544096 0.1524910139524421 0.2525085614960955  
0.2945402893518841 0.6525037026273439 0.7427709630005669  
0.1117640896675688 0.1492760312909842 0.4438638331901855  
0.7827083953221617 0.6513495092209122 0.9532931532497094  
0.5288218516275670 0.2520138049332872 0.5744994475704452  
0.3783506986924368 0.5357926318785409 0.0763055905910912  
0.0198659650310314 0.0253337173984471 0.1364061557211691  
0.8782253988849318 0.7727553969487966 0.6379882320647147  
0.8689048928657981 0.5317337699195984 0.6424345522366820  
0.0271440778825876 0.2696363490317910 0.1434066889370097  
0.3764790879036135 0.7548654447093125 0.0553637066819201  
0.5163941322935061 0.0285217032108930 0.5602328914424587  
0.4607292733628885 0.2386864021611866 0.4042211874466271  
0.4343221906755864 0.5734861638224833 0.9057347741089475  
0.9493491096107304 0.0536701334659697 0.2996363811932788  
0.9544451165021570 0.7453731293648855 0.7950561715824581  
0.9391904050396539 0.5645332035133550 0.8036539165046870  
0.9649327772668577 0.2392075599929336 0.3133321140665615  
0.4293725855016866 0.7477372060876182 0.8718132149889462  
0.4568548498291753 0.0591361126814253 0.3883544880328801  
0.4956958256945613 0.1377491535085495 0.6697099020970860  
0.4150672139769158 0.6516490186084535 0.1669203226140666  
0.0080130681193144 0.1496598195082759 0.0611414855391042  
0.8812965488496225 0.6508619435097905 0.5556838077916363  
0.4053080951234062 0.2340370219347183 0.6300580325423738  
0.5051109566540204 0.5569281078981513 0.1196922706341145  
0.9027666533104168 0.0711193210327336 0.0828701110949173  
0.9897376715031054 0.7270297227252963 0.5566639062511147  
0.9868903782491005 0.5711452556741901 0.5737336545002721  
0.9051317496660817 0.2324935263620644 0.0928891802789183  
0.5064221116674953 0.7335095416987059 0.0909813284192429  
0.3933172692670943 0.0663275104355967 0.6041304196803666  
0.2967610354073519 0.1586280527756259 0.6155862870577451  
0.6049351180441070 0.6449757382821860 0.1210759129039957  
0.7987015709690690 0.1535727103228728 0.0747966168688138  
0.0949277236342655 0.6483277162241414 0.5881846524920580  
0.2956145590746402 0.2832405322113637 0.5467901193914988  
0.6258766836667128 0.5170130279421687 0.0648187802285817  
0.7883312751925294 0.0320571287181909 0.1576026517100227  
0.0907267459925627 0.7723653920367468 0.6648268542674695  
0.0929963886543444 0.5240952830597960 0.6661373752926397  
0.7880871554222093 0.2747932533885460 0.1568407891690416  
0.6290685946305882 0.7656394265381719 0.0378165721019992  
0.2753714123490664 0.0362117316694710 0.5358678693157406  
0.3338467203692215 0.2591354413228778 0.3581827153275060  
0.5627942502567234 0.5489563210500037 0.8997450627530178  
0.8241238949359724 0.0572619920758837 0.3507869650060735  
0.0767525878268435 0.7427528504355003 0.8620213570906102  
0.0640715483650266 0.5500078180668435 0.8594427347639224  
0.8339292268119791 0.2423537471560662 0.3390688314050222  
0.5718077876297009 0.7616302528029866 0.8545450491689577  
0.328167777443713 0.0524396921848657 0.3516657021229492  
0.3979168709217994 0.1550101919122285 0.2814212088608203  
0.5138973815220974 0.6430603680035567 0.7818469888747717  
0.9061163081176994 0.1483184641593947 0.4279732392520366  
0.9914442621120270 0.6514842312698379 0.9311932118278679  
0.4126243966289589 0.6092600615045883 0.6293426680389785  
0.3728793107241028 0.7188732798743548 0.5610966845956267  
0.5876894119942053 0.6529376048892833 0.3905016647729609  
0.4682771103665915 0.6964127085938991 0.4348904577689569  
0.2314036581988062 0.6545999826666913 0.5566602729466368  
0.5392260142339995 0.6398217639543906 0.5865625365858019  
0.3564314383421551 0.6739525043652049 0.354236071098445  
0.3277013136658778 0.5801422937662479 0.4874786379868478  
0.6234989285426302 0.4728723382577131 0.3063277052828949  
0.2735500721911870 0.3311625391625376 0.8004103876643068  
0.1254822489104212 0.8228257282456539 0.4064816884788404  
0.7765324993239259 0.9788999230798135 0.9000403620110718  
0.7756612133630411 0.3274794757494069 0.9046235131603194  
0.1248877725014527 0.4757082299561226 0.4099253282113945  
0.2775887326648894 0.9793587013128314 0.7852544938248927  
0.6219118882105804 0.8263108023052474 0.2815790746719797  
0.5227472451020070 0.4332453467161254 0.4656952167614578

0.3776178227956676 0.3680541337115087 0.9541922634395283  
0.0221257352289333 0.8608439798159415 0.2541434032338701  
0.8774620244115938 0.9345338784812649 0.7509073985276602  
0.8757893304949018 0.3663274859477694 0.7535752923686083  
0.0241376406080766 0.4388318546434830 0.2563210493842925  
0.3725829619246646 0.9306837934820644 0.9473568729668542  
0.5237539326381718 0.8695021881122195 0.4402948575405793  
0.4769336572013775 0.4460117529273048 0.6830598890578028  
0.4333137242829528 0.3492771286893142 0.1645618193679678  
0.9701383454698804 0.8510930350402501 0.0366901053534146  
0.9269133405550132 0.9482175495228680 0.5332019013681801  
0.9269069574682333 0.3492262855207688 0.5358968735278522  
0.9661681691089686 0.4515804864819240 0.0413263456397430  
0.4226106234087929 0.9603076119579401 0.1589635164302418  
0.4778853218709005 0.8411167954345957 0.6533469000101071  
0.3211544076053763 0.4507454204292577 0.6538411453188724  
0.5836136346213648 0.3513841993973837 0.1557842488486171  
0.8162394640560008 0.8540955999584656 0.0433113655738195  
0.0823567952894822 0.9486526935332702 0.5472860309016627  
0.0828484285044563 0.3500340319694418 0.5510610460282185  
0.8130522827582360 0.4495238078464437 0.0529509909986737  
0.5765788067485972 0.9548026250128527 0.1465883690221262  
0.3235743017664242 0.8530807309593426 0.6465239786465456  
0.2691225615248999 0.4375269419850814 0.4264871613066027  
0.6329013009458526 0.3590453878037282 0.9385703146210733  
0.7649034037822648 0.8691271941004416 0.2627434743373648  
0.1327422459960239 0.9343901834960715 0.7720659136525150  
0.1299006856067003 0.3660861055629788 0.7765163409750061  
0.7665106503637612 0.4313478779303361 0.2728640091072427  
0.6326246116626831 0.9443561131913015 0.9248273109433800  
0.2712063168203763 0.8597404844800158 0.4209139053861669  
0.405889438178148 0.4690135873316407 0.3240905817943763  
0.4999469184058637 0.3200947435630325 0.8304099070073764  
0.8967868083188191 0.8277870718117653 0.3760540046307573  
0.9993165188560623 0.9727760999508646 0.8809541947812088  
0.9958220330092024 0.3291577783803629 0.8866408106133860  
0.8993951521079847 0.4715721838112288 0.3814209085266989  
0.4979134056592023 0.9537165121852783 0.8145965571828342  
0.4024992640083412 0.8373700583608100 0.3087226557211974  
0.6256997271500040 0.2274198562177091 0.2927889230521203  
0.1225556116956334 0.0714463322502873 0.4077843458774381  
0.7773500651307557 0.7283282345133825 0.9105525049254332  
0.7715379102701495 0.5728333546458277 0.9219165169119312  
0.1294857426236595 0.2275683686223160 0.4179211089106473  
0.2735276938066187 0.7284166409798457 0.7816980169893930  
0.6214038369113858 0.0760594876480502 0.2904501108832943  
0.5265826365093086 0.2716366074926012 0.4554639745235396  
0.3750066399817765 0.5267304882579215 0.9529590291774027  
0.0171550729524298 0.0188960105067986 0.258664167773423  
0.8836115516306139 0.7774808535780017 0.7600619376706776  
0.8740297822025050 0.5241005958718459 0.7642364320187065  
0.0274920394361550 0.2796743269368902 0.2650892107208294  
0.3668919090751446 0.7720506680558366 0.9355792016670736  
0.5224279137015989 0.0257936702461859 0.4383887274694590  
0.4817754012095352 0.2181383459886893 0.6608330554606053  
0.4290860076970390 0.5707713474097913 0.1550699912335430  
0.9809302668427116 0.0726411094872235 0.0551116099492854  
0.9096333990877130 0.7272219577800341 0.5480961910029251  
0.9074712290387192 0.5734927076001269 0.5548817580835076  
0.9831419995195594 0.2276010290922344 0.0618814392536756  
0.4311332841264267 0.7298812625323833 0.1354688585657099  
0.4689807703817236 0.0624044363285592 0.6455297681856497  
0.3249726945868744 0.2345616891993697 0.6353036995962530  
0.5839457633408474 0.5667265592754668 0.1385374973263274  
0.8234088696694776 0.0755077934971424 0.0681617175887391  
0.0689793691977755 0.7263840022697744 0.5691824361581479  
0.0667405452562264 0.5704420650428317 0.5741532230255925  
0.8259927539116968 0.2307990029268546 0.0707118958235009  
0.5847324046836865 0.7246261025115536 0.1180348171588170  
0.3144957053094788 0.0785639448851852 0.6221931272901683  
0.2728038804772439 0.2834939776754732 0.4284772789365724  
0.6297295305447557 0.5150297034463309 0.9407646844678644  
0.7683526283521424 0.0259580404744947 0.2764850888187546  
0.1245984414536707 0.7761099393035462 0.7768363590158104  
0.1212660819581514 0.5232399324629268 0.7829152713809580  
0.7726266870525834 0.2752954126490414 0.2776959870546890  
0.6351692323292454 0.7839031179663950 0.9166038931861294  
0.2674289493033520 0.0208892544349817 0.4157008860151388  
0.4046792664124874 0.2327874021388933 0.3162780086683632  
0.4989035862212169 0.5706891151135848 0.8321549912341175  
0.8987405912320009 0.0704292500420033 0.3917764487146574  
0.0000758700954132 0.7290440960558621 0.8940642859911218  
0.9914747981126042 0.5727306909992183 0.8967683239760901  
0.9046726137564555 0.2266990546081929 0.3925705376522585  
0.3992096063605112 0.0752070553185943 0.3061927261735358

Structure 26 S=8/2

1.0000000000000000  
20.1473052208877697 0.0000000000000000 0.0000000000000000  
0.0000000000000000 19.7681594983396742 0.0000000000000000  
0.0000000000000000 0.0000000000000000 13.2309279702280254

Al Fe H O Si  
2 2 6 198 94

Direct

0.2745021393889326 0.5718007431378803 0.7872344548843478  
0.4947435729956094 0.7299224706056523 0.8140637130339285  
0.3412892272888908 0.6196310555232942 0.5857209684708368  
0.4663939023228293 0.6693973111423631 0.6128300593492323  
0.2055257233934145 0.6427290359952296 0.6114660334088388  
0.2282817617210727 0.6316784781556306 0.4985859798467346  
0.6017560746534025 0.6752206708048628 0.6544193267452481  
0.5925990601841029 0.6712092652924155 0.5358630499674226  
0.4586081848237992 0.6524590273211268 0.4143558050348070  
0.4771002291300557 0.7293157409805372 0.4271386224144277  
0.7041802011372023 0.4749941465888861 0.3143818677151889  
0.1951244496481727 0.3277709285430031 0.8124653952628049  
0.2078723116029615 0.8233482321467166 0.3946234327533015  
0.6945194441925155 0.9762108137647497 0.8823369721646244  
0.6941375780198001 0.3263404764753848 0.8881120844264476  
0.2056684837035680 0.4835550949042179 0.3982334695174864  
0.2021104727621995 0.9700828214293200 0.8096839490733374  
0.7061364382980151 0.8208793346982955 0.3004557070695099  
0.5911044582090612 0.4665447088450004 0.4164022895878277  
0.3068676257392825 0.3424077264069232 0.9116148351810854  
0.0946865389732500 0.82993353110567950 0.2955892834484719  
0.8120162109125878 0.9743471756782544 0.7920243091103606  
0.8069961901464268 0.3327877338290621 0.789668420777506  
0.0944143313669521 0.4695591410004867 0.2934902058464569  
0.3169105448174399 0.9849859923789525 0.9038431709378354  
0.5963964051401740 0.8380334517596386 0.4027403783799449  
0.5979640304613029 0.5426286179717328 0.2521760629839482  
0.3044346054834716 0.2721724579590114 0.7397598973979211  
0.1039606058157989 0.7565588184427307 0.4650978343013548  
0.7936795593052122 0.0425311911858793 0.9633870567805984  
0.8018275108585650 0.2618327166567078 0.9595479542328048  
0.0967661788753230 0.5425031879192435 0.4630110346993305  
0.2924970510534255 0.0544273300211422 0.7381098199128673  
0.5948574507619022 0.7586375778707986 0.2430054272072888  
0.6013492475088963 0.4076141230254667 0.2385850976420680  
0.2889932690960962 0.4073897832973750 0.7381512763000314  
0.1069575551180835 0.8918283884623730 0.4710816259123474  
0.7959719388810088 0.9070875589925004 0.9596038615094236  
0.7939674225940464 0.3968566170864326 0.9628104300051935  
0.1071394422744545 0.4077009046114621 0.4697231170488111  
0.3134403318099591 0.9227910086858342 0.7247286615076439  
0.6075658538378746 0.8920619077753182 0.2184165883813459  
0.5259315249463963 0.4494610186232806 0.5847457754425792  
0.3800462867053005 0.3553924216535707 0.0757147440658836  
0.0215887393703094 0.8556223611244080 0.1344449977512210  
0.8784847122260644 0.9392752998896169 0.6304827066311594  
0.8782562325235933 0.3612423121301754 0.6300200616047783  
0.0193264724236284 0.4457412800182250 0.1332046993479033  
0.3716139076811981 0.9441668177247892 0.0776389820343125  
0.5268123595771445 0.8612351013632499 0.5661510476985148  
0.5180100775294808 0.3545003070593980 0.4411582699070963  
0.3956187814630445 0.4434889661206401 0.9242374850275702  
0.0177179418166037 0.9401495151835477 0.2917332018367915  
0.8797468673126679 0.8577705663756575 0.7917052972011734  
0.8820479322269423 0.4442455609506288 0.7898943135327148  
0.0182779100048849 0.3593674593104056 0.2895430033252311  
0.3487547712840767 0.8579906495560499 0.9273121593112057  
0.5153422722014300 0.9446649008031659 0.4050044802303679  
0.4584456506039065 0.4718074300997685 0.4168535768777414  
0.4350192597186309 0.3174844026288437 0.9013804686407053  
0.9648823067283726 0.8183602967051629 0.3081627190820393  
0.9443170766609765 0.9735746704893317 0.7962306397398070  
0.9380787830264936 0.3244932194871891 0.8003875310239501  
0.9645428554178688 0.4807282708467116 0.3088955494483546  
0.4449418794511713 0.9500948679261224 0.9152274112077683  
0.4662919321825598 0.8209201317627381 0.3995855192815639  
0.4850688347404981 0.5105148493603501 0.7487568091696345  
0.4292476736982461 0.2777043591203335 0.2199598438073909  
0.9776740496817213 0.7770864651964600 0.9886282947863273  
0.9189013453621239 0.0249240654571591 0.4904943644507323  
0.9145617721142372 0.2742557705138303 0.4899462316225458  
0.9737903982130126 0.5250662620587865 0.9876012943520963  
0.4148114116971784 0.0286502742914114 0.2142210224801210  
0.4859872965782956 0.7625199605971604 0.6871276900864951  
0.3996231013026083 0.4354659177721755 0.6384529090157390  
0.5090265497617683 0.3580399684392868 0.1165485734608507  
0.8957133540351142 0.8651738631765157 0.0766286893665058  
0.0042516553762038 0.9384980682458246 0.5734934193032659  
0.0032522433743985 0.3596092696986135 0.5689077988609268  
0.8927802572011770 0.4385121465571918 0.0796726413757460  
0.4995022819388126 0.9409613796198062 0.1304413115606096  
0.4001359958045803 0.8558055165658607 0.6176668236730353  
0.4946105783066695 0.3781903006073014 0.7447081056470856  
0.4245453910889634 0.4105402735523508 0.2464752168178029  
0.9923523516314432 0.9084779905428828 0.9565413349012492  
0.9085251354907422 0.8941767554104882 0.4498476399405890  
0.9068094669050190 0.4053198904492121 0.4489066124357083  
0.9877935502342541 0.3928600728123436 0.9567115029694169  
0.4073739256223038 0.8975003216907053 0.2568217925654582

0.4933632891112226 0.8862111456017537 0.7559145619374982  
0.3083083467669101 0.5327110838859488 0.6760849470964339  
0.5993727477232049 0.2768153200202961 0.1998878391715141  
0.8087434043149977 0.7768135740585651 0.0047452733067442  
0.0943972599795637 0.0240482640989316 0.5003548050211553  
0.0977684324112317 0.2757022516490014 0.5048943736193480  
0.8029428267963389 0.5261392731781344 0.0113498237444256  
0.5892911499238686 0.0247458900213865 0.2058582037833624  
0.3066164676978504 0.7883429056543163 0.7201097511777461  
0.2833093137622554 0.4362694466069251 0.5445713920102466  
0.6341554473618467 0.3629363418887719 0.0568974950693099  
0.7701402243629208 0.8672147974436111 0.1409561032857798  
0.1265126744749971 0.9424380507503960 0.6508547409290560  
0.1230681778026216 0.3606178757951752 0.6532003336365448  
0.7671594289430749 0.4349750320581374 0.1472197218338573  
0.6177738778099685 0.9545317430651632 0.0428356077639196  
0.2745017255347130 0.8598870868569450 0.5586794602371313  
0.3313727513156519 0.4622987782809481 0.3612395555005561  
0.5651811415376682 0.3268194275445430 0.8958587784331633  
0.8358866976575958 0.8382039553928317 0.3055498753563439  
0.0737092316748507 0.9682075170774030 0.8288551466925792  
0.0670060655548627 0.3282179925114266 0.8278125868480265  
0.8346188046024254 0.4649036630475544 0.3079091799818363  
0.5675887450289857 0.9728926768635283 0.8582416926088956  
0.3360896414085349 0.8281035173333772 0.3876205435143568  
0.2518070460076001 0.3579767092616794 0.3918137387140219  
0.6287471768644577 0.4448145118424732 0.8972584299372219  
0.7554521327640451 0.9447402750028941 0.3046435319249625  
0.1405707920607358 0.8531450674242755 0.8014612774011290  
0.1307415161316217 0.4451817475642788 0.8098431683908179  
0.7594346631207347 0.3540990007203626 0.3093721038148586  
0.6323583579105503 0.8592112738369365 0.9025969072720058  
0.2683467265479738 0.9434928912338229 0.4016467907601000  
0.4122869696879662 0.5442465495640372 0.2671365756776340  
0.5035657982804094 0.2467100289844281 0.7696737459478116  
0.8868374535975208 0.7603771123833146 0.4423075387346069  
0.9983643100877384 0.0437433134603812 0.9424943534714442  
0.9931065001981378 0.2573755306225980 0.9487574818832455  
0.8881702912726060 0.5402088095987321 0.4442625699383165  
0.4677619544462672 0.0193498923625158 0.7495443049577570  
0.4076424213874000 0.7604640902661324 0.2547068123233865  
0.7049582234213256 0.2323322742916127 0.3048105093256689  
0.1893964123887797 0.5660834113431302 0.7812260151933282  
0.1973625115590070 0.0557640168116170 0.3800199800846072  
0.7012846688648221 0.7462410974000014 0.8931125036260713  
0.6952823508931654 0.5606355735508036 0.9015892085465299  
0.2087555582782364 0.2333948278844712 0.4099437865399712  
0.1938345084334278 0.7306107190363346 0.7784672979429779  
0.6997071552668288 0.0653862294045653 0.3024637323819692  
0.5905921729002945 0.2476329187110881 0.3970667831004177  
0.3072392884155919 0.5429184375699341 0.8995765855140976  
0.0781636715858768 0.0588918071166249 0.3062947721031822  
0.8194614127359831 0.7391708751073159 0.8115653062367773  
0.8106525365292987 0.5562801219473430 0.8143827940843134  
0.0958122345153979 0.2502919283858916 0.3080162428962510  
0.2966458706655291 0.7385484751157085 0.9050980442813455  
0.5871121493973571 0.0570840101745143 0.4015611907333747  
0.6039852148056958 0.1512549740705331 0.2589058801932408  
0.3001893662805195 0.6540413193236769 0.7495090827941859  
0.1104441982751738 0.1500030933962540 0.4434077622703992  
0.7862846251030007 0.6510849594890057 0.9535133939711845  
0.5301266589639932 0.2523213216998688 0.5723096767680228  
0.3737746975566066 0.5292592193066308 0.0747918746726717  
0.0176426138625878 0.0252522817583897 0.1368587599055974  
0.8771772714141031 0.7718738636681989 0.6391595613101989  
0.8701800596236023 0.5318976680411663 0.6406397484697542  
0.0243265135029007 0.2698781729742429 0.1415649011003689  
0.3712720830323423 0.7656845524922623 0.0656053407611436  
0.5145417044575126 0.0247318445547563 0.5636842864027103  
0.4578786232892443 0.2376277887249460 0.4066882305029797  
0.4367826988208592 0.5702187100835582 0.9124698203770946  
0.9466592354119893 0.0536842332684244 0.2985364846011146  
0.9515531459928600 0.7445713407401710 0.7975165687155857  
0.9422034024532177 0.5634863327657265 0.8005933687960980  
0.9640414672081296 0.2382293394254993 0.3117622866056360  
0.4287800799118164 0.7541043266544797 0.886075777733559  
0.4554135720058378 0.0642472030427482 0.3965872595360880  
0.4976387056741070 0.1374829534686350 0.6649863155302417  
0.4045017411297067 0.6492485179937267 0.1502904328029406  
0.0026816652599544 0.1494149658630069 0.0641152173529225  
0.8828046440781293 0.6511675958953226 0.5542898905020526  
0.4070934574144070 0.2343748590430843 0.6311402456179190  
0.4993586700277157 0.5571839485659835 0.1192854764063586  
0.9001885150435948 0.0657236322735687 0.0728041895015571  
0.9903847043722104 0.7299716876595850 0.5563906638147751  
0.9872793002548760 0.5698863912969747 0.5665473118724708  
0.9014115765377161 0.2355844072432176 0.0881826831163581  
0.4981631205201902 0.7399253711064933 0.1096935320729329  
0.3920667225742561 0.0681725346749849 0.6048247048824935  
0.2966691934775586 0.1615287534012765 0.6226747597374651  
0.5958914131459644 0.6487929641073725 0.1305080763273476  
0.7983238645810115 0.1521844571723948 0.0753305101706963

0.0942838764898305 0.6483797165775504 0.5830737862508720  
0.2990524496581872 0.2824482856801943 0.5405580193983425  
0.6191039456905668 0.5258437309219449 0.0564629802590172  
0.7893564507577766 0.0320793399042257 0.1636721811323035  
0.0930182539435696 0.7709192252816267 0.6640783677710169  
0.0922315883737452 0.5241852694826615 0.6618642634584812  
0.7844571697213928 0.2736649434256892 0.1561311706379375  
0.6202298789122437 0.7686137452049417 0.0477250900689477  
0.2724243865176348 0.0405462256804963 0.5410113455520885  
0.3318833720539076 0.2547832601670322 0.3509031564286301  
0.5670038172616461 0.5649210225109768 0.8805876688832650  
0.8226340312587941 0.0546905287286768 0.3581811092362160  
0.0754345838974812 0.7431372369501280 0.8604906967156044  
0.0683566368367882 0.5581798698555869 0.8542988263639273  
0.8331702472943537 0.2433906997984046 0.3376537220055829  
0.5726364269390328 0.7427065761390652 0.8620372804985207  
0.3265570420331543 0.0597638822861581 0.3580218236787328  
0.4015438021203899 0.1541446438905885 0.2745210407985067  
0.4905450603953089 0.6448671912734378 0.7692598767354186  
0.9044043874996189 0.1487075047509046 0.4274415892733170  
0.9901141537496224 0.6517234874896417 0.9319727805096306  
0.4225388603430474 0.5868698309563040 0.6062183786255310  
0.3753959176495448 0.6999942699617835 0.5774610679213633  
0.4882962931011482 0.6830986751177911 0.4509096043353399  
0.2412760000170314 0.6519261788202617 0.5630322261770511  
0.5740080847551684 0.6569561736344169 0.6005035132581095  
0.3337195378698469 0.5910069555679528 0.4698334862281611  
0.6238350359386470 0.4727794109675066 0.3045394332525079  
0.2743805205339639 0.3374003302928665 0.7992934642256547  
0.1279681067016007 0.8252030213090117 0.4076077272445961  
0.7738299326108170 0.9751764969033663 0.9004292722602963  
0.7740152012654657 0.3287729617418168 0.9016389723718942  
0.1257034570377876 0.4753810919781806 0.4067660851652929  
0.2807524543191802 0.9821460742185997 0.7937972684449258  
0.6263049707969118 0.8278184362609953 0.2889727040348515  
0.5233996622132051 0.4349335706665418 0.4645412198959857  
0.3792888987940418 0.3653480436175766 0.9537578243641613  
0.0246070570277758 0.8614001508606438 0.2563081254446210  
0.8786798738054671 0.9360303829780123 0.7526549023162632  
0.8765333811012803 0.3660323420479469 0.7518511086901128  
0.0239495337116345 0.4383666356773340 0.2548785948996395  
0.3705106855385663 0.9341286934559205 0.9559363666426351  
0.5265788721521213 0.8679029299372287 0.4443546579260513  
0.4751133043093509 0.4443863900668391 0.6798088888140115  
0.4349686653586389 0.3506568605873398 0.1650776720975355  
0.9716258912830827 0.8516881370666887 0.0384410467800120  
0.9280988610503426 0.9491760439825527 0.5353154460972674  
0.9265009362312208 0.3499325782935505 0.5336669805319709  
0.9683284923038615 0.4505480394209001 0.0383167572014717  
0.4238877841005640 0.9529684878660811 0.1696422128170303  
0.4753837112471096 0.8419855264293772 0.6567576453849285  
0.3211820569334446 0.4532504599768121 0.6488241849630271  
0.5858734787143066 0.3513330646498683 0.1530869017776465  
0.8182912351880556 0.8536897880609349 0.0452160342600456  
0.0826759092910589 0.9496172868016757 0.5491031724830121  
0.0824590785502519 0.3508055447089682 0.5491813163334655  
0.8147830289058506 0.4492452012908038 0.0508851861325442  
0.5783640744082458 0.9529181867103761 0.1491809491433432  
0.3230706567663237 0.8555503795451526 0.6562722508189890  
0.2688471079564066 0.4354829167473012 0.4247282408524234  
0.6303804497396531 0.3660578766144078 0.9341813738580408  
0.7673557902821486 0.8683560724440980 0.2632025889858980  
0.1352268100832605 0.9327729162883822 0.7719067419809561  
0.1285939768290235 0.3666141582003776 0.7753104913333496  
0.7662533017961464 0.4317464034895067 0.2697970360173433  
0.6276575392593088 0.9396131313701090 0.9228920300948864  
0.2718037420710881 0.8646903959368221 0.4362273296872376  
0.4064840964484373 0.4715151890718267 0.3233947875585091  
0.4993097605470616 0.3186770114098617 0.8279527615564312  
0.8993558092754266 0.8287147629379853 0.3776751039113164  
0.0019769765573255 0.9725966606326226 0.8817552627879700  
0.9964761332424038 0.3270397067310727 0.8846158849978887  
0.8989928658669497 0.4719089520294861 0.3787954739444276  
0.4933697153357379 0.9571687776908218 0.8186631409039197  
0.4029788613604011 0.8285794289186011 0.3216302378427435  
0.6249539385120667 0.2278509667192632 0.2901380353957124  
0.1206303441340543 0.0719398557779223 0.4086673726006908  
0.7781886204394477 0.7288845894629362 0.9162900508051169  
0.7737693070450927 0.5730505779746746 0.9207569592756464  
0.1283965822233736 0.2280276786819842 0.4162139764349789  
0.2746062448072717 0.7277617133683650 0.7873820385113700  
0.6203426946422368 0.0739988464838329 0.2916942362784257  
0.5239218020019194 0.2732265825619257 0.4539980973491726  
0.3756755485716289 0.5218542123392569 0.9512766695466598  
0.0152189344399250 0.0193391441210828 0.2590705314016645  
0.8818586342702827 0.7782848039061289 0.7610867691615189  
0.8761300005910485 0.5239700451286204 0.7623328211991811  
0.0261259636504063 0.2794221879963562 0.2634001830719056  
0.3633487741425101 0.7778070348774379 0.9442823968919416  
0.5184185804616958 0.0235413726450895 0.4413155128481639  
0.4838736050430979 0.2180402591600912 0.6592269237113126  
0.4223932119947119 0.5697605377659727 0.1516060976989350



0.9792448900232873 0.0715281803577604 0.0536392276030394  
0.9101979809797917 0.7279600394251644 0.5485971751009125  
0.9077204610780499 0.5733691759931437 0.5516331007618080  
0.9797450986367232 0.2278436573854547 0.0606001477500068  
0.4210894849045934 0.7286786710619362 0.1432402252987684  
0.4676883805060426 0.0628837073465403 0.6463146334152041  
0.3268461731880908 0.2374504106407960 0.6342575484073414  
0.577263179853360 0.5691286954762877 0.1398541761194348  
0.8205045181114059 0.0734105558966167 0.0689550573743387  
0.0700421741229463 0.7267252651286871 0.5671656384553163  
0.0671418963228700 0.5706797924809244 0.5691975322710302  
0.8220055719878606 0.2305562465014983 0.0687980393105729  
0.5768862250505350 0.7284597194113279 0.1314671592749856  
0.3137321840373536 0.0813432310562982 0.6270337856766893  
0.2731732523217051 0.2817119147106962 0.4238789481345565  
0.6269403730120469 0.5234451264976900 0.9336654488282068  
0.7676375327485987 0.0245077979597332 0.2814146084367296  
0.1258515413623475 0.7741720233783062 0.7766342091591443  
0.1220369342283897 0.5242415199485083 0.7776224074270824  
0.7709204609543723 0.2755883992614837 0.2774314401373340  
0.6300381281952835 0.7784856455082857 0.9255192150731857  
0.2668050024086162 0.0246934752020601 0.4205630502686764  
0.4050388391688928 0.2316895953325871 0.3139672727419495  
0.4945374853340413 0.5717073040003582 0.8272729116465304  
0.8980742367449663 0.0703086181083875 0.3935392007394780  
0.9991522504372709 0.7292808308530437 0.8946719203790736  
0.9942528726479465 0.5737206871944216 0.8937636361861444  
0.9036831505537395 0.2269793389191434 0.3912778798781346  
0.3989308840477104 0.0761591875323275 0.3109066384422776

Structure CH4+H2O/5 S=10

1.0000000000000000  
20.1473052208878016 0.0000000000000000 0.0000000000000000  
0.0000000000000000 19.7681594983396991 0.0000000000000000  
0.0000000000000000 0.0000000000000000 13.2309279702280005

Al C Fe H O Si

2 1 2 12 199 94

Selective dynamics

Direct

0.2698368257690547 0.5717165857171409 0.7885881749110766 F F F  
0.4959107736770179 0.7317980470676346 0.8145992533491295 F F F  
0.4849219261953413 0.6581857097920624 0.3672441772532010 T T T  
0.3240454594581206 0.6251910861031958 0.5942877649011540 T T T  
0.4991162941763128 0.6587498248255103 0.6266646062595215 T T T  
0.5060415591799694 0.5685832490940239 0.5063731962456079 T T T  
0.6277842268788530 0.7562438969663905 0.4561857828043452 T T T  
0.6217551576888377 0.6782060312741403 0.4395089441324520 T T T  
0.1976793232266813 0.6667631007220971 0.5735058095299629 T T T  
0.2394028396939885 0.6619932702949678 0.4719256427556386 T T T  
0.6092419927414003 0.7152018273876110 0.7158308661417567 T T T  
0.6235528684393039 0.6987206618802142 0.5954858687203288 T T T  
0.2476418745995778 0.5666726349635747 0.3797320171082586 T T T  
0.5176790969709240 0.6143953745882424 0.3588577492052252 T T T  
0.5125803579172563 0.7052461488510368 0.3571366839099626 T T T  
0.4607456527867088 0.6578913004450412 0.4413581727208676 T T T  
0.4446386640665694 0.6553824976112198 0.3126473927910435 T T T  
0.7021633605915909 0.4769461333055460 0.3110912389582836 F F F  
0.1923625483766074 0.3334762338774979 0.8151331437158902 F F F  
0.2041092763049690 0.8207034158621767 0.3995877836952033 F F F  
0.6933778226658589 0.9769940367567429 0.8862246760224224 F F F  
0.6934217619756069 0.3226840394494772 0.8878938331590263 F F F  
0.2054678780540726 0.4829809868250550 0.3931692615591516 F F F  
0.1993553143209610 0.9654720788287605 0.8077718301572574 F F F  
0.7053832021751987 0.8251356625285666 0.3030352410821777 F F F  
0.5915107421535879 0.4595182358673711 0.4167237555201950 F F F  
0.3057342978479056 0.3392836104177235 0.9108136364022883 F F F  
0.0945258096827644 0.8344755886394921 0.2925572730037800 F F F  
0.8095904618791323 0.9734255408242021 0.7915743657570218 F F F  
0.8061352363054013 0.3329097617312584 0.7891446896357053 F F F  
0.0936345827534311 0.4660737480958659 0.2909848147885441 F F F  
0.3134807608995160 0.9830745441206545 0.9045993707234246 F F F  
0.5938400295174802 0.8418828114355392 0.3988573667058901 F F F  
0.5910287085006516 0.5371038176431497 0.2529840854838312 F F F  
0.2973125083015304 0.2752914460716696 0.7346748946466803 F F F  
0.0938482929916802 0.7573442996382838 0.4573407268028546 F F F  
0.7944590698971297 0.0448641536633403 0.9589354482574137 F F F  
0.8022491041630033 0.2623829179577726 0.9597382508156969 F F F  
0.0947755206091827 0.5422640651384967 0.4561996892038920 F F F  
0.2881877288845018 0.0530427217830720 0.7399504158970558 F F F  
0.5963482948082586 0.7613872365039285 0.2427977494904638 F F F  
0.6035012805789748 0.4025692634501397 0.2381592449504453 F F F  
0.288804646078285 0.4111014274604372 0.7429747961892659 F F F  
0.1039104521901422 0.8913498233055748 0.4734693287979894 F F F  
0.7955280889891512 0.9095663776973808 0.9649940528130685 F F F  
0.7914084591227919 0.3967319897059411 0.9633349460276577 F F F  
0.1088201810064007 0.4081749764328961 0.4714068176552004 F F F  
0.3135837559707539 0.9215329349651071 0.7274828758033323 F F F  
0.6105639464958372 0.8953804473902309 0.2134571540516674 F F F  
0.5211546007910002 0.4382667512088290 0.5819802962625076 F F F  
0.3777417132611376 0.3552316201783157 0.0765888691642189 F F F  
0.0253144212462146 0.8624487023707559 0.1284762243010533 F F F  
0.8734563849347694 0.9378651626884107 0.6264507007448117 F F F

0.8757228147190190 0.3638794891158952 0.6273366765170181 F F F  
0.0196880848999328 0.4413699391575108 0.1302815002191053 F F F  
0.3697383086895840 0.9446502434633075 0.0755206775476793 F F F  
0.5226355603517518 0.8601620885542687 0.5608722446332521 F F F  
0.5129767332824571 0.3511903713398752 0.4266816807755021 F F F  
0.3928329519235731 0.4403862434320445 0.9212805389074177 F F F  
0.0163763632082023 0.9432409687699277 0.2907143726584636 F F F  
0.8787793861102315 0.8590579448726245 0.7909413847154809 F F F  
0.8805314337667625 0.4443669834449082 0.7902078677659574 F F F  
0.0151241072173107 0.3581829975262778 0.2907396733964234 F F F  
0.3502447571997536 0.8568576823552192 0.9249983233697705 F F F  
0.5123460692167825 0.9471985391693138 0.4031513514884040 F F F  
0.4601202370108197 0.4731279260908821 0.4131669263652284 F F F  
0.4347501108340595 0.3138861112709250 0.9067582027696801 F F F  
0.9639634991535075 0.8218857356599401 0.2964638671427053 F F F  
0.9427080927614426 0.9747681841692000 0.7878130739556255 F F F  
0.9375416921591793 0.3249625835224421 0.7942059343787662 F F F  
0.9633031107220660 0.4802654201608902 0.3029639472675001 F F F  
0.4436849272977739 0.9521589367357279 0.9138599408057004 F F F  
0.4639538957912563 0.8237895875322891 0.3893815897283659 F F F  
0.4770720761879090 0.5141419930120676 0.7367507579991468 F F F  
0.4263266090503208 0.2735269023084754 0.2159895570343693 F F F  
0.9835859345694118 0.7799439367735346 0.9864728105445906 F F F  
0.9098519906461817 0.0232584584746363 0.4849379588585165 F F F  
0.9120079231116875 0.2768606458512011 0.4875611482378019 F F F  
0.9779749654626357 0.5241551285665977 0.9874498117455843 F F F  
0.4134598102123235 0.0258275613696242 0.2166248395463413 F F F  
0.4843414985343841 0.7645750179868216 0.6904164648119746 F F F  
0.3943199212004060 0.4392478432899622 0.6279623486162080 F F F  
0.5070536907898813 0.3565664886780553 0.1190101027705381 F F F  
0.8991268239224937 0.8670733398178641 0.0731465472449173 F F F  
0.9986109694149121 0.9392118512991843 0.5682654869583814 F F F  
0.0005934986964533 0.3634987838675130 0.5637492383654461 F F F  
0.8933877708079692 0.4380450894561179 0.0755602306374286 F F F  
0.4958154771815799 0.9352539528786536 0.1366527183315895 F F F  
0.3964227782468939 0.8540965031584449 0.6120314647565692 F F F  
0.4820489515253072 0.3807376609124589 0.7492947867389148 F F F  
0.4213223338263390 0.4054329913583246 0.2507648697315688 F F F  
0.9927864825494268 0.9108968623911480 0.9482544538559239 F F F  
0.9050230138334143 0.8920977764950564 0.4444576059146073 F F F  
0.9030354510942260 0.4077852025684194 0.4449463356554020 F F F  
0.9873352005228284 0.3923485168923619 0.9514873358699134 F F F  
0.3961233548723726 0.8952721747062142 0.2546129208175714 F F F  
0.4867752943041594 0.8912304871835559 0.7479695988129507 F F F  
0.3058994658287091 0.5356699587209235 0.6749660798288994 F F F  
0.5955633582829805 0.2719219390136089 0.1996548914909511 F F F  
0.8170138000722957 0.7774257177447979 0.9940291169414763 F F F  
0.0877141879799410 0.0240697474674718 0.4928258628452511 F F F  
0.0931855216089588 0.2763844022696489 0.5012738892953479 F F F  
0.8073310438896755 0.5271035397155686 0.0028894347371988 F F F  
0.5808999780688424 0.0259680140451835 0.2091368850612128 F F F  
0.3069998625267587 0.7858740592130147 0.7163904018410818 F F F  
0.2726987157384215 0.4356130669932412 0.5500470676487410 F F F  
0.6318046186824020 0.3571001612833982 0.0563701721897800 F F F  
0.7752176389670353 0.8569838633913278 0.1419981932898651 F F F  
0.1194732047216789 0.9485994520506296 0.6500901618279755 F F F  
0.1185499565716768 0.3570971821489977 0.6539182298490758 F F F  
0.7689051581288311 0.4415055819407954 0.1457717476526383 F F F  
0.6101203232711399 0.9614539353685387 0.0411078560955218 F F F  
0.2675503301281665 0.8623179404135684 0.5646309076824068 F F F  
0.3318578379834065 0.4549008283606426 0.3734604976047464 F F F  
0.5639752831671814 0.3333644361552572 0.8894311315526124 F F F  
0.8341653346577260 0.8206848131094446 0.3125857618958392 F F F  
0.0713936108591895 0.9820547837983966 0.8292041214165948 F F F  
0.0653616145830611 0.3199213467503057 0.8298572083258478 F F F  
0.8323562969752842 0.4762219524863838 0.3104058329460031 F F F  
0.5672752555185170 0.9694404683100757 0.8523312769077194 F F F  
0.3332632647198679 0.8312029942666044 0.4000648261962425 F F F  
0.2456840031696217 0.3553286946880334 0.3938380979676452 F F F  
0.6385457514647896 0.4442370792971531 0.9038000694332027 F F F  
0.7754682262781856 0.9396939402179640 0.3015162874104291 F F F  
0.1206324605202198 0.8590141714798776 0.8019488521363769 F F F  
0.1150673901255530 0.4428028054445505 0.8093908881246250 F F F  
0.7662470509198656 0.3600539600027943 0.3075939783202983 F F F  
0.6342619308113058 0.8599563482494830 0.9136369322176776 F F F  
0.2585871448495425 0.9431424780052637 0.4046730763684394 F F F  
0.4011957132180157 0.5385643291860234 0.2644607211165351 F F F  
0.5036441170577106 0.2495983276710518 0.7669522382512142 F F F  
0.9061576652512713 0.7566323474637926 0.4435678360619733 F F F  
0.9846660902375035 0.0461087984598620 0.9414632936535483 F F F  
0.9832846332112979 0.2570829864700244 0.9492804431139632 F F F  
0.8973695478330299 0.5438283773349113 0.4450316435397497 F F F  
0.4683924110799893 0.0257818464703874 0.7540892255209499 F F F  
0.3899015727822288 0.7590560439967291 0.2596884411407743 F F F  
0.7023822060732741 0.2432576564811555 0.3143254977183645 F F F  
0.1866347100339354 0.5571028501165429 0.7980362529134979 F F F  
0.1952012718052742 0.0598981482478678 0.3845692697620535 F F F  
0.6993718888019771 0.7440675843268281 0.9145174940404601 F F F  
0.6932391057210197 0.5665352690474208 0.9157005681903456 F F F  
0.2047692866520094 0.2302730147224139 0.4109589366609185 F F F  
0.1939438873958537 0.7462251660026524 0.8033583191164198 F F F  
0.6946391777542189 0.0444162003334299 0.3112819525351540 F F F

0.5832436978398974 0.2398897154798476 0.3948264236389747 F F F  
0.3109097789632287 0.5459495702995909 0.8948958609708129 F F F  
0.0801167417988893 0.0603513753005771 0.2978659603185676 F F F  
0.8060219600159328 0.7466767572861670 0.7995883183104411 F F F  
0.8000288072834536 0.5511851585916503 0.8045388215071156 F F F  
0.094426428744344 0.2504546931333635 0.3044301427663640 F F F  
0.3065430940978473 0.7331208668504061 0.9013779505424111 F F F  
0.5820388526837093 0.0613488682491194 0.4039275231220927 F F F  
0.6173902673084086 0.1479836514640311 0.2584712126495816 F F F  
0.2839902510704491 0.6553049205061541 0.7424581128853731 F F F  
0.1033557022407763 0.1504732807783640 0.4414708029881425 F F F  
0.7931370107816846 0.6516342654334508 0.9409495192437589 F F F  
0.5233877040615269 0.2568796987611250 0.5687640862974206 F F F  
0.3708142115996722 0.5256146896480516 0.0721215830795074 F F F  
0.0134168519692395 0.0258802862353704 0.1338290775706739 F F F  
0.8770280858617454 0.7746961776354198 0.6367717202871859 F F F  
0.8729779638895536 0.5304544559324782 0.6394718491434546 F F F  
0.0203407845239880 0.2704852182934943 0.1403624567306920 F F F  
0.3691312312345829 0.7673045546740767 0.0685090354397104 F F F  
0.5103388696217621 0.0246430438289309 0.5649976713272977 F F F  
0.4503056038313318 0.2346129647755788 0.4051648814483784 F F F  
0.4411485272467530 0.5635778913679346 0.9159066056006964 F F F  
0.9487032898658114 0.0587181481043189 0.3007563561001518 F F F  
0.9380276926227396 0.7400035520945494 0.8066215560802092 F F F  
0.9299886788102185 0.5679109237614952 0.8111529970583575 F F F  
0.9632232601185891 0.2360549601207254 0.3127731179124780 F F F  
0.4379535456670212 0.7570421927531115 0.8998311095282503 F F F  
0.4507345158672464 0.0661357033771921 0.3993769069866957 F F F  
0.4971775435091246 0.1403152063359059 0.6596814045229848 F F F  
0.3893641226620659 0.6470817778105982 0.1510095743156370 F F F  
0.9969520122178963 0.1499814147143326 0.0646928976937957 F F F  
0.8869600360597900 0.6517491565182354 0.5612179973767013 F F F  
0.4029829617411878 0.2343004793758467 0.6371665869342067 F F F  
0.4922559750145084 0.5633634466079727 0.1256578104129247 F F F  
0.8937838292933478 0.0675362722921378 0.0843871071088387 F F F  
0.9948952448854271 0.7278478731374420 0.5843718774477864 F F F  
0.9920904011238179 0.5720765468868052 0.5761732924300844 F F F  
0.8963132086768866 0.2354197550446244 0.0958727238233266 F F F  
0.4901230405506638 0.7327007724126133 0.1327935792552566 F F F  
0.3894383471056599 0.0704849039682074 0.6101894653028097 F F F  
0.2922039494768782 0.1612336274928765 0.6261859963764564 F F F  
0.5940011420768343 0.6477813037456457 0.1390992893637844 F F F  
0.7921429004539462 0.1533874748795014 0.0750255199344778 F F F  
0.1014571213102471 0.6486755840308973 0.5748358116115000 F F F  
0.2988442475033324 0.2793734262117837 0.5353233859515782 F F F  
0.6092234084494237 0.5254166495013521 0.0567015988281909 F F F  
0.7772178584488358 0.0319427893889568 0.1567795274567345 F F F  
0.1100125362573507 0.7708999211514467 0.6545682991515136 F F F  
0.1022964530190933 0.5240157528427574 0.6536875174125569 F F F  
0.7778275481418717 0.2747803955024395 0.1557453835371589 F F F  
0.6031742788020082 0.7667315194579913 0.0458116829267823 F F F  
0.2712230788939678 0.0396487758543955 0.5431624130900303 F F F  
0.3258293691328547 0.2539732991528254 0.3427211445481504 F F F  
0.5685053265566822 0.5550081104809905 0.8694780215336522 F F F  
0.8213007017534864 0.0616035136392838 0.3437311126953304 F F F  
0.0668628196492591 0.7396662243329857 0.8407638217170472 F F F  
0.0591427517532352 0.5614676900263049 0.8365236342346449 F F F  
0.8322086169808003 0.2447728568744125 0.3339039051334112 F F F  
0.5775444145580266 0.7466592087057293 0.8488394808275501 F F F  
0.3232099646465940 0.0554779754391248 0.3580023467759830 F F F  
0.3950486652688951 0.1511966634430735 0.2715477342669956 F F F  
0.4915048093797267 0.6443171636431515 0.7799736637051708 F F F  
0.9004138802442512 0.1500663268922722 0.4301547528849952 F F F  
0.9895165412126730 0.6522284275986507 0.9364163514713155 F F F  
0.5372526562218544 0.5904179168400029 0.5524294258497120 T T T  
0.4090824783275693 0.6547577847473821 0.6004704725567777 T T T  
0.6445254501168076 0.7124257340789200 0.4797575892587054 T T T  
0.2407170053808468 0.6791582793968275 0.5437811090878928 T T T  
0.5990112645520815 0.6851315121917697 0.6588437792034975 T T T  
0.2717470458791640 0.6101187403559982 0.3882031316137445 T T T  
0.3242243437057555 0.5917339711374157 0.4586525567723045 T T T  
0.6221624124962801 0.4691284622387641 0.3038580195707965 F F F  
0.2714932956294831 0.3397958339298484 0.7995645867832906 F F F  
0.1240090737905177 0.8260368646644878 0.4063706263158267 F F F  
0.7729515650258350 0.9757694347295853 0.9012367926507991 F F F  
0.7732384420883420 0.3284394828138772 0.9011772169311669 F F F  
0.1246155317369997 0.4743411573092260 0.4037276510329662 F F F  
0.277699269583280 0.9801150899477165 0.7944273174617891 F F F  
0.6263273509257985 0.8317345543095271 0.2860011567206229 F F F  
0.5218475944217360 0.4297181103291692 0.4601609209949160 F F F  
0.3776690405934602 0.3627522451587311 0.9543012928198920 F F F  
0.0249796452332447 0.8656967039497587 0.2506970793262582 F F F  
0.8761010428268889 0.9364901070949543 0.7488341568832837 F F F  
0.8749426737333437 0.3667630807795348 0.7494469173255567 F F F  
0.0224984691803556 0.4361819825303002 0.2521808506761332 F F F  
0.3695770340594251 0.9338600329288411 0.9543292390181932 F F F  
0.5219434036501767 0.8692980851816756 0.4394641489824309 F F F  
0.46905141543153515 0.4438983758912514 0.6754245997564183 F F F  
0.4326088964660926 0.3480084520958684 0.1657657449068850 F F F  
0.9749558624155341 0.8550754838868357 0.0331900884308354 F F F  
0.9222134851515165 0.9480594887248017 0.5299726993737579 F F F  
0.9234730824337021 0.3528638279587710 0.5301643976768915 F F F

0.9692609098508314 0.4491732077087107 0.0349982552219572 F F F  
 0.4194693142339219 0.9500576296112087 0.1710810723239931 F F F  
 0.4719326418108096 0.8416337009099095 0.6530941146151861 F F F  
 0.3163810074049707 0.4552490520532686 0.6484235900191564 F F F  
 0.5841166917883953 0.3471000725615383 0.1534323216345115 F F F  
 0.8220290014296197 0.8526612346592586 0.0427387243465844 F F F  
 0.0771551793939835 0.9510326380136433 0.5462313270400472 F F F  
 0.0796748217355443 0.3511603462278359 0.5476568499524888 F F F  
 0.8156393360141436 0.4508905530489713 0.0470513398828274 F F F  
 0.5737421884392759 0.9546368821853832 0.1494120153362388 F F F  
 0.3208970848718380 0.8554334305863520 0.6559711633651801 F F F  
 0.2651961688748159 0.4314193894799985 0.4285511516855181 F F F  
 0.6313259676398033 0.3649034600878664 0.9342307731344377 F F F  
 0.7728013181337161 0.8615389263148003 0.2642187131791047 F F F  
 0.1276879238607975 0.9383100503593198 0.7711529962128623 F F F  
 0.1226226015889651 0.3644055158926562 0.7760821410689900 F F F  
 0.767352252484044 0.4380049293906083 0.2683849836881933 F F F  
 0.6256903824941489 0.9408225995049904 0.9245333235396416 F F F  
 0.2660196031429649 0.8651293107229918 0.4419026186539625 F F F  
 0.4039051263583957 0.4680077551520228 0.3250255633401480 F F F  
 0.4962995828999297 0.3201653493149692 0.8282532727418825 F F F  
 0.9025584227974264 0.8243319926646819 0.3754495049692252 F F F  
 0.9977539136611497 0.9775511419679788 0.8773841671355669 F F F  
 0.9933172360212907 0.3248194833331510 0.8825008839420008 F F F  
 0.8992080666098659 0.4759070451686256 0.3770339901021131 F F F  
 0.4913973046817404 0.9591626958920330 0.8160542853578150 F F F  
 0.3955990298135958 0.8279265527516131 0.3241763353091187 F F F  
 0.6248550091448593 0.2265231631510645 0.2917162840332068 F F F  
 0.1171441678539438 0.0732383111289892 0.4052827110177546 F F F  
 0.779059685741387 0.7300140103084374 0.9127618254605991 F F F  
 0.7731334461349775 0.5738849147094669 0.9159725582821565 F F F  
 0.1241585454550886 0.2276450294449361 0.4142759873755892 F F F  
 0.2725359303263559 0.7305176245035341 0.7902442404962364 F F F  
 0.6192473564631413 0.0698983453983999 0.2950344046611519 F F F  
 0.5174741558221427 0.2704885493107128 0.4482458850109339 F F F  
 0.3762232690260348 0.5193069175043661 0.9492996461675034 F F F  
 0.0145842389670889 0.0220811350403380 0.2563865846796034 F F F  
 0.8749083284562147 0.7798681714187623 0.7592618137369698 F F F  
 0.8706361992471017 0.5236204966001310 0.7616488655588327 F F F  
 0.0236227876281276 0.2785848726529778 0.2624064841403069 F F F  
 0.3678821601576985 0.7777335235810838 0.9468799307513436 F F F  
 0.5142747548457791 0.0253107505926664 0.4425546539458196 F F F  
 0.4810566827857414 0.2203638493389732 0.6580087055929340 F F F  
 0.4138038188249240 0.5691735257782824 0.1528320986404026 F F F  
 0.9716782671130773 0.0726634911078534 0.0551868164577058 F F F  
 0.9164164948846789 0.7277340992198020 0.5561497996423341 F F F  
 0.9126904257433281 0.5743732422707382 0.5555011811788972 F F F  
 0.9736812683753655 0.2282274345236672 0.0623213481399887 F F F  
 0.4107300518869934 0.7259038295412310 0.1523342242454717 F F F  
 0.4659161113367176 0.0655315143796997 0.6477707387077274 F F F  
 0.3229177695460663 0.2370913588364587 0.6339786502809446 F F F  
 0.5713010679793626 0.5689188521632289 0.1435086588622880 F F F  
 0.8144958392340769 0.0746739958077853 0.0686359360571203 F F F  
 0.0740095169276742 0.7269150385795129 0.5672708812770466 F F F  
 0.0717932390488230 0.5712404384192737 0.5659255240212531 F F F  
 0.8174613398618007 0.2312819107271054 0.0708281476750798 F F F  
 0.5700098755874237 0.7263179724896034 0.1388323329197689 F F F  
 0.3106681656970807 0.0812393919827343 0.6301770875727897 F F F  
 0.2692654519285256 0.2786752101423318 0.4210623325541292 F F F  
 0.6270797715621441 0.5224879315503941 0.9366234229039705 F F F  
 0.7676790713681356 0.0197042321238783 0.2775675770136630 F F F  
 0.1228839280787639 0.7789497151838845 0.7758485210638000 F F F  
 0.1174452845889320 0.5220180897409534 0.7759734243126104 F F F  
 0.7699939850834596 0.2805108949096393 0.2781350943898104 F F F  
 0.6272720506048302 0.7789269809275154 0.9299507444983064 F F F  
 0.2628340555228306 0.0242087189069125 0.4230946016390504 F F F  
 0.3993699725777233 0.2288280344074423 0.3097300181458422 F F F  
 0.4948522528835326 0.5677961708425485 0.8255544463808064 F F F  
 0.8950735363272173 0.0727307703265083 0.3899987909826947 F F F  
 0.9946340036241779 0.7287046473561247 0.8925867441311297 F F F  
 0.9896671654168827 0.5752750466718481 0.8932205601361005 F F F  
 0.9014729389670322 0.2277606402762444 0.3907887758859090 F F F  
 0.3951156975745391 0.0738255273052602 0.3113637809502805 F F F

Structure 6 S=10/2

1.0000000000000000  
 20.1473052208877697 0.0000000000000000 0.0000000000000000  
 0.0000000000000000 19.7681594983396742 0.0000000000000000  
 0.0000000000000000 0.0000000000000000 13.2309279702280254

Al C Fe H O Si

2 1 2 12 199 94

Direct

0.2677523346430064 0.5725401121393126 0.7957359556341045  
 0.4956417915600139 0.7310729000044256 0.8020825632723556  
 0.4994009921806968 0.6867386138381333 0.4246783584823309  
 0.3220375477715062 0.6235753961028067 0.5977571614221723  
 0.4939460235505123 0.6786683614461380 0.5793121865036639  
 0.5263579413926479 0.5550087860899441 0.6231730657815876  
 0.6972904774747085 0.7562744663738661 0.4445988567763431  
 0.6897601466445934 0.6786672402355856 0.4333423045188118  
 0.2010500170584930 0.6743347548354003 0.5775280077981282  
 0.2404897356125075 0.6641619648042648 0.4746603315153235

0.6057965627653131 0.7225316945978417 0.6865181664144510  
0.6304916284547962 0.7068781324241441 0.5723176333590537  
0.2402612891983581 0.5674479411926414 0.3861169145019285  
0.5129703780304251 0.6366396585128372 0.3953352949173891  
0.5373096632191664 0.7234514488788250 0.4021397994895999  
0.5047161043278138 0.5603556421361497 0.5097968808584677  
0.4504602720421328 0.7009678202039297 0.3959901811530461  
0.7024046238286565 0.4752607164480369 0.3145922280794540  
0.1928560332319152 0.3332664306689738 0.8173621507250178  
0.2007834635327694 0.8210936847037553 0.3970585625088001  
0.6915733595026438 0.9774863921630650 0.8887295256021730  
0.6938098345935275 0.3239914087335024 0.8892050465958620  
0.2050536247376211 0.4829752541733093 0.3977768095968027  
0.1971349941043564 0.9678309836840605 0.8072682507807550  
0.7048716042113268 0.8289845485671057 0.3111990911958729  
0.5918304177257010 0.4557004728708708 0.4201859191411812  
0.3059611504163479 0.3363906683861497 0.9144969438908058  
0.0915731030256301 0.8342315689193889 0.2900250695593424  
0.8066191479282379 0.9711068166879770 0.7915003621284132  
0.8066809488245945 0.3337967258274213 0.7919439140199214  
0.0937939180133285 0.4664556963432355 0.2928292772971957  
0.3127562787012098 0.9815426988900721 0.9032813446386223  
0.5900765176801595 0.8432861527629328 0.3935785165317023  
0.5911574280909896 0.5361237454540393 0.2596511260088623  
0.2967746640633015 0.2724472469931309 0.7385312295053860  
0.0910373823659971 0.7573968629027999 0.4549653140566660  
0.7940733087154134 0.0459021928249546 0.9562773672071041  
0.8017373719655313 0.2627171879058843 0.9614598295233463  
0.0936970802650486 0.5425740127097289 0.4574954646854923  
0.2886833177520728 0.0525557844128979 0.7400639745637829  
0.6031656970571835 0.7651596030867417 0.2310532114777155  
0.6035796307354657 0.4015227203451849 0.2400718982768483  
0.2916127905691964 0.4083285918899781 0.7464592553767985  
0.100092036381367 0.8911501372410368 0.4715637569611093  
0.7937104806436361 0.9113053178330649 0.9694965440060089  
0.7917169940365839 0.3969757881505210 0.9681771500938774  
0.1067843724078554 0.4086192495770764 0.4736926379606530  
0.3097844369195160 0.9202764090452915 0.7264907792653139  
0.6137246249685216 0.8993120063084735 0.2116446856794048  
0.5203759008562352 0.4328535806035445 0.5837564802410907  
0.3772554294511234 0.3538234366369838 0.0810318444014689  
0.0229971953763769 0.8630829702836228 0.1255794928953172  
0.8711354862187023 0.9381029609403114 0.6253327984419420  
0.8752509914777337 0.3638355447360606 0.6281340966257347  
0.0224084479452145 0.4408447697809088 0.1297185728936665  
0.3701901456611605 0.9475742411327166 0.0733948796252630  
0.5191892383709865 0.8641724731749630 0.5578588451898147  
0.5119235962543679 0.3478951691321836 0.4265725257943713  
0.3907695585742254 0.4392997216570737 0.9258008701345330  
0.0141801931532194 0.9432121673700955 0.2886516491820876  
0.8785204959041868 0.8586553572000455 0.7891670544371270  
0.8813205605028043 0.4442439770150272 0.7914839590775584  
0.0166194085215933 0.3578459546936286 0.2905507653953646  
0.3520916636788187 0.8561967847021950 0.9260643027255138  
0.5135615640822566 0.9514042350274891 0.4011870335126481  
0.4609786135322235 0.4721340444056358 0.4159481952900447  
0.4355715723377653 0.3133825840738526 0.9125084096806982  
0.9608972497315936 0.8221058263526083 0.2921507989835521  
0.9394774593026687 0.9761611431238856 0.7867969735350805  
0.9382525340802104 0.3250011971285044 0.7938951818528442  
0.9624442572813521 0.4786588575827918 0.2994278454119580  
0.4441704876427371 0.9522141284419289 0.9125214293833671  
0.4596559492310425 0.8311991863890587 0.3865113006826069  
0.4892157742670816 0.5157126320599432 0.7305038346624183  
0.4277464160414572 0.2745113831064743 0.2218259334430524  
0.9842861252703698 0.7802375081857327 0.9822460392688397  
0.9066208902221637 0.0214850748592646 0.4808179826813831  
0.9117149467503655 0.2760696250554550 0.4891916637172862  
0.9809297243225485 0.5244473916505843 0.9879368166150166  
0.4133060990296321 0.0283421690011516 0.2155863493262982  
0.4779898660149761 0.7633427250927269 0.6774371239136552  
0.3943515223523874 0.4458833138460038 0.6325327344337009  
0.5074338841337186 0.3555340559004356 0.1199298158612680  
0.8968418049267287 0.8631194476454384 0.0708047045634108  
-0.0032675485342862 0.9411021713640615 0.5687980968418476  
0.0006593388223829 0.3613510234096690 0.5678308513092316  
0.8959114149733537 0.4382055701301350 0.0760495632969713  
0.4945943872248899 0.9342008060008140 0.1440237089141323  
0.3917259147862703 0.8555276592990250 0.6057325627019783  
0.4772151572964640 0.3827084287207188 0.7557306094751688  
0.4237081796117730 0.4074100514520219 0.2510580660324102  
0.9890256629165141 0.9117763086048868 0.9465350487100589  
0.9052272291138894 0.8895629660627317 0.4459254305520179  
0.9054179055745182 0.4069063307098080 0.4456444960482868  
0.9888353008878498 0.3927313539666190 0.9506195173790105  
0.3887091560199961 0.8987316038705468 0.2531614541379217  
0.4801578659112817 0.8873452588395558 0.7462460697842614  
0.3002923346215183 0.5348955123864733 0.6812903934411856  
0.5963350916545932 0.2711518652028166 0.2001534131967516  
0.8102412646464768 0.7777350057050677 0.9907464158986292  
0.0865372612636745 0.0240766423623504 0.4908891827580579  
0.0930049070615262 0.2761480703028409 0.4999921039940559

0.8112914343442950 0.5279185810272292 0.0027688030002364  
0.5803059169445507 0.0289427415070428 0.2053578759232195  
0.3058382515041403 0.7850338380356251 0.7150461352917544  
0.2732036221697693 0.4347262192651772 0.5542784574041085  
0.6323238654616726 0.3569222974176561 0.0579744599693963  
0.7744028701781437 0.8532397822723032 0.1451175016599078  
0.1184293511535626 0.9490605415504277 0.6480688552834678  
0.1200091626002317 0.3548967782726200 0.6541725129031168  
0.7726932068828205 0.4457948156835705 0.1499791542634928  
0.6038977965453768 0.9621068726745194 0.0373869680964884  
0.2623833399848912 0.8612584007909548 0.5644772896669388  
0.3326341833693420 0.4498009320864194 0.3767787081704285  
0.5642811247739284 0.3368967007281146 0.8896720974095047  
0.8319686263095734 0.8168805442848073 0.3185142586151212  
0.0685926054769103 0.9820991446697988 0.8264952103021460  
0.0659543474122677 0.3190196866528863 0.8299839952093793  
0.8318502462942585 0.4804700981833917 0.3201764557754668  
0.5680478203905421 0.9587414169757287 0.8456832802869739  
0.3294883644573426 0.8320416352154659 0.3998432122480233  
0.2420168116352355 0.3554283250218738 0.3997251836187672  
0.6406954081870849 0.4458089023510643 0.9080095148492967  
0.7817713792260456 0.9394946886416378 0.2996701154126566  
0.119663622347610 0.8601495629532910 0.8001430548432064  
0.1152094598731522 0.4421005134044886 0.8075441154864940  
0.7721809174472952 0.3615306066544126 0.3082771199099281  
0.6410219368294034 0.8572847311183590 0.9237712662461048  
0.2544450225272963 0.9434594301353071 0.405829775128039  
0.3992987326847154 0.5390700061492812 0.2705611731787185  
0.5043226321024066 0.2524543670533297 0.7681069351760935  
0.9099887121156323 0.7543894766678174 0.4433125532427170  
0.9834951104209363 0.0469765088947763 0.9397568480378802  
0.9826266724386844 0.2575477166876740 0.9498470470930659  
0.9061365579651481 0.5428592548912016 0.4493667871653889  
0.4715289808576236 0.0226523116022060 0.7515563532910482  
0.3873526429049421 0.7617620101868152 0.2597383021818452  
0.7022799173278073 0.24891344463569256 0.3196756331362493  
0.1848774262689905 0.5573800406597215 0.8138331463059314  
0.1948556871344109 0.0615460406753528 0.3848259714601123  
0.6949040845796717 0.7363588840505784 0.9083628949725147  
0.6942534888609367 0.5674790530501772 0.9270910234421244  
0.2048755452977500 0.2289154694623307 0.4123217501056637  
0.1932370689716247 0.7482850878258047 0.8068507365390013  
0.6939703983678932 0.0382325324066036 0.3099110603524314  
0.5818262194912074 0.2361195928091054 0.3934014344276485  
0.3122754214718036 0.5477931079121606 0.8993402264578214  
0.0800948619797837 0.0594429254575346 0.2959968305142222  
0.8022934193222380 0.7485782647167145 0.7957155113154908  
0.7960751176571126 0.5475378890460606 0.8045854660789226  
0.0955616459254713 0.2501079743622822 0.3032082713776837  
0.3072827500334294 0.7335802052735940 0.9013442361825393  
0.5821570678778010 0.0657264358297261 0.3999618384255781  
0.6259750556371633 0.1483626191388444 0.2562637771953616  
0.2804656289542177 0.6552018179774897 0.7450010614120326  
0.1016997779142469 0.1503531489785000 0.4399229064306758  
0.7953803110746008 0.6516277445213102 0.9354390269912438  
0.5246290173144224 0.2539916999773380 0.5696156524005916  
0.3737880072498382 0.5266988128123030 0.0742893035328065  
0.0130014532121403 0.0259523178288457 0.1320040177268748  
0.8761172543139628 0.7741900645880302 0.6349226004253080  
0.8733015111448884 0.5307391324651459 0.6417673400531676  
0.0202423616507354 0.2699505645352743 0.1406292421880447  
0.3739354604029795 0.7651348393389369 0.0653607501864187  
0.5131746978418890 0.0299026144990648 0.5628685213387460  
0.4489579705009930 0.2315497071286339 0.4090126951956510  
0.4430724160704858 0.5596687010793636 0.9108476413155484  
0.9485492132971087 0.0594589772362184 0.2990986429445102  
0.9339158217819026 0.7377735474072837 0.8071063863478215  
0.9245807471137131 0.5694107051529737 0.8179149016585470  
0.9642542290326015 0.2362249498142455 0.3145806240645893  
0.4388946901614562 0.7564679881414500 0.8909374168554794  
0.4505355790207581 0.0692265431818109 0.3982762532751287  
0.4943354210881971 0.1409581963507591 0.6678911618343073  
0.3877195738388138 0.6473475384366539 0.1583213714235960  
0.9954675942329707 0.1500181161294693 0.0642950655858079  
0.8916178011923154 0.6507233521104109 0.5634314482762043  
0.4034726925748941 0.2377051140143005 0.6384797245086000  
0.4921792649184157 0.5653332272785546 0.1347319386492355  
0.8929174333562516 0.0665702101955470 0.0837138983169180  
0.9963288624331372 0.7303876362505031 0.5900549453685418  
0.9957698084733416 0.5696785394454108 0.5890776090647858  
0.8958188348532455 0.2361544399242529 0.0972537690341215  
0.4907220068841515 0.7300057836274929 0.1441228663984029  
0.3902267852544295 0.0675830527340646 0.6103073963797544  
0.2949294342365376 0.1604139172257066 0.6262111639424757  
0.5961260913399929 0.6466803479737695 0.1453390776553118  
0.7920727093076837 0.1533443359201510 0.0753120926639734  
0.1020960137365687 0.6500144797795782 0.5738745177807153  
0.2972507190296869 0.2794063455410066 0.5389731412379994  
0.6073780013690498 0.5239011533659754 0.0626541256492904  
0.7755873468029397 0.0312382783657011 0.1536802047078820  
0.1144061739422998 0.7720764049999029 0.6508561078108553  
0.1121766022844851 0.5264510245769929 0.6534099262247491

0.7768552998988248 0.2741425130296375 0.1575992687713808  
0.5937996722719490 0.7570278810549176 0.0307678598265482  
0.2709229636227078 0.0397204084346375 0.5434691300718580  
0.3256068219833202 0.2577205804880526 0.3460387487496364  
0.5707884692205181 0.5566527737043535 0.8742092949835387  
0.8205426839842935 0.0640447668918182 0.3389037573048747  
0.0641316627993280 0.7407387128726914 0.8317010826725554  
0.0542554352786623 0.5588768334381652 0.8268528937455355  
0.8329153249660807 0.2438998641176431 0.3342127266374736  
0.5766330399185553 0.7571860666354219 0.8290534645581557  
0.3230971293174650 0.0531674655046351 0.3585155332498055  
0.3904061267722703 0.1525849183140650 0.2728616201030752  
0.4967664298807223 0.6446064973428364 0.7764657987651831  
0.9007416171627045 0.1494204891438002 0.4303170683658604  
0.9922229317879806 0.6522815698156333 0.9339471271812594  
0.5344919466385235 0.5804475796674187 0.5599780185808538  
0.4084139894117118 0.6454410377321140 0.6047596377190257  
0.6907887348363593 0.7147306164586237 0.4833650412949430  
0.2438120410570095 0.6838847882521277 0.5451886932308964  
0.5950937882021450 0.6983917769777401 0.6237737920330240  
0.2672339231314398 0.6091932912235944 0.3937427770545852  
0.3187889525014301 0.5865343168208279 0.4636163480029890  
0.6224377522771223 0.4672202301108913 0.3072890927046927  
0.2721795367883614 0.3376748876596163 0.8029246766209728  
0.1208096361297922 0.8262372847543269 0.4039620388878274  
0.7712419816464411 0.9758743002889508 0.9019831150848475  
0.7735740532597082 0.3294431991356495 0.9038210938432086  
0.1239109669343754 0.4743669880897743 0.4061576630656216  
0.2761306417394708 0.9797579291632373 0.7939321356283359  
0.6261443970008616 0.8347607620633462 0.2843323482634036  
0.5214904479410052 0.4259017176334792 0.4614540763107130  
0.3771618483097798 0.3615156949984319 0.9587325920048642  
0.0224092963907408 0.8658763866969469 0.2477229447551597  
0.8738744550635142 0.9361919801881944 0.7477833501388713  
0.8753390394846904 0.3668145674093450 0.7504081246227624  
0.0235337465430699 0.4357265970923321 0.2517326981312787  
0.3700283774293563 0.933722055722118 0.9530704012838511  
0.5201174690355291 0.8727855286216929 0.4360770746606414  
0.4692882840606584 0.4440461332476995 0.6778469489217360  
0.4333817036096904 0.3480745753644381 0.1686103998304552  
0.9728760977439578 0.8545871497382308 0.0301991687127641  
0.9204173450670274 0.9475755980912771 0.5292081116113964  
0.9238307338196624 0.3519369000689093 0.5319656444168642  
0.9716656683537205 0.4493469941095012 0.0348818139711950  
0.4175764214653916 0.9520125734260115 0.1714982568521752  
0.4671641739725836 0.8422126349647041 0.6463373335782957  
0.3153251005215913 0.4558432228677358 0.6534435920846722  
0.5844524200985978 0.3463905544858085 0.1546036926022831  
0.8189479234601829 0.8513527121534641 0.0428476490785558  
0.0752731936496097 0.9514193163686419 0.5449426844541650  
0.079663577209094 0.3500962644585937 0.5489762172652085  
0.8181248114688223 0.4521145151339342 0.0491642694672290  
0.5723266994516627 0.9562321622226889 0.1491004639679896  
0.3172219582640909 0.8548313484271181 0.6538789612320721  
0.2647826716525906 0.4310754503726878 0.4330153725267811  
0.6320700073988005 0.3663847433004450 0.9361289582459117  
0.7735942257662994 0.8607991277207582 0.2670396539574578  
0.1260912317929763 0.9394701209936341 0.7694342894663411  
0.1233449066345130 0.3634664913284598 0.7763057319214883  
0.7697666183415245 0.4400125224576591 0.2723264108762586  
0.6253881729464612 0.9374778852367019 0.9249327141709865  
0.2620763093025216 0.8652415337041306 0.4417444089169411  
0.4037261912443838 0.4674674718812001 0.3283181788606543  
0.4957373717461218 0.3216765965997413 0.8321018109786763  
0.9024868430756763 0.8222792602698898 0.3761305317488771  
0.9951666374970788 0.9782172245344801 0.8754807443596060  
0.9939053709791950 0.3247774720164139 0.8824071304403985  
0.9016183653364693 0.4759109707263987 0.3796938677765719  
0.4909984714662856 0.9549216792381290 0.8132840775868896  
0.3912201158586162 0.8314573616977176 0.3227406974554318  
0.6266933512299270 0.2267187617219855 0.2923947444109108  
0.1163593639534402 0.0732820071928361 0.4038216849958854  
0.7744239359866332 0.7288734479873678 0.9080679634532964  
0.7738350903368552 0.5734838081039880 0.9173110583735768  
0.1241728703430273 0.2271303998319410 0.4136460759765479  
0.2715605095247487 0.7310281531450326 0.7916669697027876  
0.6209369060956856 0.0701941403615670 0.2920193527778877  
0.5170538415181187 0.2670710490189125 0.4491013426105371  
0.3776760620951136 0.5192776478099461 0.9513613032477317  
0.0139891302404057 0.0221003168043878 0.2545533731747401  
0.8726793273573015 0.7795367387547905 0.7575104806780160  
0.8685701846099054 0.5231756729437733 0.7638171394999403  
0.0244287090387633 0.2782243010582899 0.2625058649287819  
0.3706835114240094 0.7767295412474046 0.9440292555401645  
0.5150305638584582 0.0293168392600370 0.4404005814979884  
0.4809275581871653 0.2212291812738739 0.6608336204994366  
0.4133459294059079 0.5699849783881322 0.1590976750171204  
0.970695959884972 0.0726370078975265 0.0539561052766649  
0.9185698448448232 0.7275207017644422 0.5575571530983807  
0.9172343552783762 0.5732894985470554 0.5610310011358911  
0.9729668701824958 0.2284271377012133 0.0626931306396653  
0.4107845912139221 0.7256356358432652 0.1558657207117780

0.4668042151584952 0.0654208466488241 0.6483819128376820  
0.3232589225182035 0.2369306187303186 0.6361876415242823  
0.5714366289683136 0.5685610172768286 0.1503419589082442  
0.8137831563965077 0.0745675479777951 0.0669180828960945  
0.0748548883759949 0.7280536797940976 0.5668818585218975  
0.0750146774489453 0.5717208955485344 0.5691261822993030  
0.8169658690827325 0.2313602846863905 0.0722995026670002  
0.5704006761297046 0.7246004486475368 0.1364640167691485  
0.3116621997588788 0.0801437606933967 0.6302653388681313  
0.2678976276995661 0.2792161921865660 0.4246041307997479  
0.6275755554927280 0.5233442597536052 0.9432647399678590  
0.7683209986567263 0.0187597992484289 0.2748290935842063  
0.1229523446082346 0.7803003938495411 0.7732655734539998  
0.1183735328256315 0.5219047741309597 0.7776076375836749  
0.7713058366107675 0.2817517929225625 0.2800560441544701  
0.6247879674502334 0.7765122782077096 0.9209754172602111  
0.2616589691803773 0.0242569737719681 0.4235727032739702  
0.3979973134190997 0.2294506977582454 0.3131297807664020  
0.4985933259014400 0.5705786123088155 0.8241822209952939  
0.8941618044170820 0.0728150831140871 0.3874524426283447  
0.9937544977371586 0.7285212562154660 0.8885766289892020  
0.9886761048030400 0.5751004017555095 0.8921240377961033  
0.9020964690769577 0.2273249819783562 0.3917412515124838  
0.3939199901118083 0.0749347275739966 0.3114087021118450

Structure TS Reaction CH4+H2O/5→6

1.0000000000000000  
20.1473052208878016 0.0000000000000000 0.0000000000000000  
0.0000000000000000 19.7681594983396991 0.0000000000000000  
0.0000000000000000 0.0000000000000000 13.2309279702280005

Al C Fe H O Si

2 1 2 12 199 94

Selective dynamics

Direct

0.2687946380335475 0.5717978628333782 0.7928424492374617 F F F  
0.4952038897269659 0.7311295201312973 0.8064093136330612 F F F  
0.5041301952261316 0.6658453607145469 0.4268093735910141 T T T  
0.3209320725215614 0.6231977974299171 0.5954058851203412 T T T  
0.4959470974189170 0.6710062914966927 0.5988065113882337 T T T  
0.5334727908531844 0.5457377247432933 0.5784107978521883 T T T  
0.6975968308876861 0.7479974091838736 0.4359954009161497 T T T  
0.6846250110421509 0.6706702142074252 0.4280865167566599 T T T  
0.1984693813433926 0.6713422366821329 0.5750902143424170 T T T  
0.2385086750111984 0.6640026574179116 0.4725956669966876 T T T  
0.6048670703881528 0.7345066284829563 0.6753626444840817 T T T  
0.6280525231127686 0.7122892042625817 0.5627829855367025 T T T  
0.2410465642475891 0.5666963405084712 0.3807510847012994 T T T  
0.4732566155534416 0.6294144348994868 0.3854294696227228 T T T  
0.5491307172175937 0.6795447155523812 0.3846665489277354 T T T  
0.5337708520945906 0.6174485968288759 0.493632338942511 T T T  
0.4742834148524517 0.7121450169062139 0.4355346145029257 T T T  
0.7024109695339362 0.47564139890158669 0.3128487344889308 F F F  
0.1920258334245588 0.3332679098857625 0.8177490075258547 F F F  
0.2015372113631528 0.8217660963866891 0.3971263998733292 F F F  
0.6918063238228811 0.9786497574609712 0.8889415467581401 F F F  
0.6938967571755441 0.3229370215692668 0.8888348454592432 F F F  
0.2048705812537506 0.4827085295118891 0.3943452785579709 F F F  
0.1969482226827139 0.9680685945855174 0.8082846981001097 F F F  
0.7043568903044957 0.8274248189050581 0.3094910331546004 F F F  
0.5911297061679761 0.4587428892892973 0.4170148672047347 F F F  
0.3060760079569746 0.3391092652385268 0.9123758322290954 F F F  
0.0918374007647316 0.8339669433456720 0.2910056541811628 F F F  
0.8068628611257864 0.971260441305004 0.7918236819877009 F F F  
0.8063198311135764 0.3332998317447533 0.7905930888096080 F F F  
0.0933253721520373 0.4664686432378531 0.2919239624303884 F F F  
0.3121259817655613 0.9809063832335312 0.9051439312758660 F F F  
0.5908608466584511 0.8413880446379949 0.3963517838582575 F F F  
0.5928083767956025 0.5371745090174898 0.2539242372840249 F F F  
0.2966456051652884 0.2743864533951950 0.7368341924721378 F F F  
0.0920414679367383 0.7577769920542252 0.4564940397295416 F F F  
0.7951649085700438 0.0452334931623284 0.9574226219887478 F F F  
0.8025508443251468 0.2625945204679283 0.9609340493810379 F F F  
0.0943750799302308 0.5430870230787903 0.4565732118104719 F F F  
0.2886605117279188 0.0527533659867316 0.7415700651593014 F F F  
0.6009092479895699 0.7634750121915772 0.2340284131594927 F F F  
0.6032354985717774 0.4022112847262207 0.2385225425156321 F F F  
0.2881765695235785 0.4102294322382960 0.7448354024052790 F F F  
0.1008164276180281 0.8916570477681773 0.4718565826106911 F F F  
0.7930548852724399 0.9104276806908373 0.9686222218832867 F F F  
0.7918415375848937 0.3967091929503397 0.9661395479639765 F F F  
0.1072934963361192 0.4091585672596025 0.4733119941240318 F F F  
0.3093009306892043 0.9204471341921447 0.7277536244749214 F F F  
0.6117464631906202 0.8979004176636067 0.2136015426853888 F F F  
0.5195802145364397 0.4405810824893166 0.5812175176982279 F F F  
0.3782165916710198 0.3544989089949695 0.0770729473468990 F F F  
0.0231031688206826 0.8628673645886238 0.1267587398384933 F F F  
0.8715071754904571 0.9376787967163480 0.6262381541373614 F F F  
0.8753920703258586 0.3636731630531287 0.6276175422453676 F F F  
0.0215801268722160 0.4404032545078991 0.1294123671939644 F F F  
0.3691734549238248 0.9444429504106395 0.0753138348906646 F F F  
0.5193786704561987 0.8620040814437573 0.5606345881400898 F F F  
0.5125424671183367 0.3505181392067342 0.4292311120791439 F F F



0.3934692532270390 0.4407140684559820 0.9219165072130480 F F F  
0.0146614135767251 0.9430179710946618 0.2899713094752698 F F F  
0.8785765287880025 0.8585966511563967 0.7904525170670809 F F F  
0.8812664195999886 0.4439410458235642 0.7909621990799565 F F F  
0.0162548522499435 0.3577577740605520 0.2907277210831722 F F F  
0.3526213658705331 0.8554338177977741 0.9244679674413803 F F F  
0.5122043663537283 0.9481528587410608 0.4027574156091589 F F F  
0.4595292060399956 0.4726619117214597 0.4119255077923398 F F F  
0.4351672287423511 0.3143550891837918 0.9070375489991562 F F F  
0.9610459571697874 0.8221083517443759 0.2935000219061052 F F F  
0.9397529874898893 0.9759058340975173 0.7878849704689586 F F F  
0.9376409546679625 0.3242685703966686 0.7938851879955493 F F F  
0.9624570537054424 0.4789147524682349 0.2996677409643311 F F F  
0.4433867389688757 0.9529020362761713 0.9144197870870485 F F F  
0.4610299989335616 0.8257064821118476 0.3899828880567213 F F F  
0.4781579426370328 0.5156457449544618 0.7320946151090766 F F F  
0.4266023259422909 0.2745032551743520 0.2193142069270877 F F F  
0.9836067756373978 0.7799124582940991 0.9840607936947023 F F F  
0.9070138629882081 0.0220600332689855 0.4828725130751295 F F F  
0.9124486295289245 0.2763755710165583 0.4883242711726936 F F F  
0.9811850469513530 0.5238042236440705 0.9868005063347809 F F F  
0.4113840860219398 0.0265701518264336 0.2166477471534876 F F F  
0.4749403828597138 0.7639241627511311 0.6839976055847288 F F F  
0.3926031608236826 0.4397970117820122 0.6295697627364873 F F F  
0.5076718220457508 0.3548939799119495 0.1187812946859310 F F F  
0.8969849006587722 0.8644975341601864 0.0710963591908822 F F F  
0.9969386989989852 0.9405202748572279 0.5691978447502848 F F F  
0.0007136059459256 0.3624848462398234 0.5668324158725468 F F F  
0.8952567263040265 0.4386315211402589 0.0750284356043451 F F F  
0.4945122011687531 0.9350642035163901 0.1411940718371127 F F F  
0.3919531312362778 0.8568032641998116 0.6079045508447010 F F F  
0.4816095437934891 0.3813229108422078 0.7491334905233558 F F F  
0.4227548500813683 0.4074628738541151 0.2478975753991293 F F F  
0.9901712792595987 0.9112348662156933 0.9470723236795067 F F F  
0.9047939190746419 0.8904037476517885 0.4458450019358935 F F F  
0.9047469382705273 0.4072346661142703 0.4452816257980459 F F F  
0.9882257890974984 0.3919119353296736 0.9505776347812187 F F F  
0.3925066859612301 0.8959430893598110 0.2551084577359291 F F F  
0.4812340292411932 0.8888593496918986 0.7481536756434650 F F F  
0.3023008487400887 0.5349758875674908 0.6779594560475459 F F F  
0.5969453487273881 0.2713711824234579 0.1998799657401804 F F F  
0.8117929575685139 0.7773462072020720 0.9919646829332578 F F F  
0.0864768104467757 0.0243795396855475 0.4928280404422480 F F F  
0.0929649298586170 0.2767125217023576 0.4998696534878064 F F F  
0.8093088331036640 0.5275351175902756 0.0022517961678119 F F F  
0.5799900708003989 0.0280539807586351 0.2072091818781772 F F F  
0.3055070784860447 0.7851396706154432 0.7149743176734233 F F F  
0.2713237299414430 0.4353110769580084 0.5518288292876363 F F F  
0.6325295874153838 0.3570956499411508 0.0570642534218990 F F F  
0.7744095814920371 0.8536907931321238 0.1448663342822911 F F F  
0.1185179284286804 0.9482815795458563 0.6490373543279162 F F F  
0.1197527281414636 0.3554296629734353 0.6540150476498212 F F F  
0.7719127933335912 0.4440975842205930 0.1484227715636308 F F F  
0.6062114892932442 0.9614100985727205 0.0397020169017637 F F F  
0.2628046671626620 0.8617375170728820 0.5646561785319193 F F F  
0.3318016079078134 0.4494688313267758 0.3744876669156696 F F F  
0.5642922753070323 0.3355841974644704 0.8895536245140008 F F F  
0.8318787410647772 0.8176623797049771 0.3181188516157789 F F F  
0.0687160849513830 0.9822395818857501 0.8269662109128291 F F F  
0.0653016287923194 0.3184716999945678 0.8292585055325432 F F F  
0.8319002829233710 0.4794060929595361 0.3173483403392510 F F F  
0.5672454906947806 0.9623230698031193 0.8490101277836857 F F F  
0.3304728430081667 0.8315716523422765 0.4010866108062245 F F F  
0.2420757193494794 0.3545531610714008 0.3979524563543748 F F F  
0.6406176764731271 0.4448556571105442 0.9053971029284895 F F F  
0.7794712443884819 0.9393171480764053 0.3003147184567041 F F F  
0.1199317726171572 0.8599587806557167 0.8018475821327584 F F F  
0.1134829563523780 0.4420100883612292 0.8076687416291506 F F F  
0.7705893813930089 0.3609730090097329 0.3080208434714748 F F F  
0.6400295228083976 0.8586167331473433 0.9193639873538189 F F F  
0.2564222144132629 0.9438525228647165 0.4057477053521836 F F F  
0.3968953957579231 0.5390446455976345 0.2678442014554250 F F F  
0.5049711508441490 0.2506434650537983 0.7678537399236518 F F F  
0.9090042833079650 0.7551764282382365 0.4442382511284038 F F F  
0.9835727495980606 0.0464727812307046 0.9411971904934617 F F F  
0.9825988333157198 0.2567909717354482 0.9496909580548092 F F F  
0.9042506345867167 0.5432236827713766 0.4479800149949611 F F F  
0.4701220222285727 0.0240487456022365 0.753589986256354 F F F  
0.3875590621620546 0.7590989892741575 0.2621336853170249 F F F  
0.7026923668194769 0.2467849343237916 0.3184071458993358 F F F  
0.1862196769476796 0.5553954576611986 0.8104124788622258 F F F  
0.1945823174573036 0.0611706327339974 0.3863251983384473 F F F  
0.6954456287768807 0.7381094646026867 0.9113716314859630 F F F  
0.6933038458075487 0.5672814538977136 0.9219795060066218 F F F  
0.2048287243110565 0.2285192310128537 0.4129133091112891 F F F  
0.1933501658157937 0.7478531322221329 0.8075662826857553 F F F  
0.6938930857813261 0.0399307609323145 0.3105727540763894 F F F  
0.5822771070017581 0.2390237499498582 0.3942319306957955 F F F  
0.3141367054656214 0.5482630820997940 0.8958189245508947 F F F  
0.0799650710621904 0.0594583717213908 0.2976276507559419 F F F  
0.8025267788039940 0.7483580869651760 0.7970812005122170 F F F  
0.7972327749046855 0.5483137977468431 0.8038524033863936 F F F

0.0955646507506032 0.2501265618539392 0.3034227064899397 F F F  
0.3078490007025678 0.7325170330255659 0.9005971589908555 F F F  
0.5818140940678873 0.0624137869387198 0.4025071056227816 F F F  
0.6223402794285704 0.1481482827496379 0.2595850963612207 F F F  
0.2801215567702258 0.6550522020973943 0.7430908672939083 F F F  
0.1015393897184325 0.1505822761522140 0.4409259382280126 F F F  
0.7943145816497861 0.6513743708048025 0.9364751278127059 F F F  
0.5241785123874081 0.2552065805531214 0.5696962424526077 F F F  
0.373428562833041 0.5261620600174552 0.0717196386175800 F F F  
0.0132461759909859 0.0257732893769287 0.1333921643418634 F F F  
0.8760957808193766 0.7740895005873085 0.6361767455797676 F F F  
0.8736813183557004 0.5302686072307523 0.6409124506294077 F F F  
0.0204670840729833 0.2701638462219265 0.1404233549589762 F F F  
0.3712592572055371 0.7663854554073382 0.0679366358144051 F F F  
0.5113927546408590 0.026520099032800 0.5642979156488721 F F F  
0.4493732903353020 0.2342565895266517 0.4078379109040711 F F F  
0.4447371367814696 0.5634601399758807 0.9129045778027844 F F F  
0.9484300404844888 0.0589365370710340 0.3003998376186061 F F F  
0.9343411484025026 0.7379278205603939 0.8079386290556485 F F F  
0.9261360253010409 0.5687766128123499 0.8160456483018663 F F F  
0.9643206121162748 0.2357339096333888 0.3138799724210486 F F F  
0.4396320278166570 0.7541367727507478 0.8979988289207839 F F F  
0.4504474005184136 0.0667844593681508 0.3989341809264673 F F F  
0.4957347212442684 0.1402852886295705 0.6640444385964415 F F F  
0.3867619045857040 0.6471348575154110 0.1551017060267981 F F F  
0.9963646245895035 0.1498161972969072 0.0651066290314901 F F F  
0.8908693524725919 0.6508585915841394 0.5632631437620574 F F F  
0.4034014746683781 0.2361178241602104 0.6393677212312880 F F F  
0.4912890155968910 0.5652665438954259 0.1345560612835328 F F F  
0.8933495090866970 0.0670506165336917 0.0853590833493527 F F F  
0.9960231580149639 0.7301838894466783 0.5894982695129585 F F F  
0.9952316643871484 0.5701056098038109 0.5859025740253045 F F F  
0.8961465440986842 0.2355176232309830 0.0974384074572043 F F F  
0.4894737043232951 0.7306320224203517 0.1417620188334894 F F F  
0.3897017449986322 0.0686830858792931 0.6111130941453311 F F F  
0.2938016467067328 0.1608227803031923 0.6275865542223897 F F F  
0.5948584264298873 0.6474577665955721 0.1399653255513940 F F F  
0.7921408453550356 0.1532535961759365 0.0749878984779073 F F F  
0.1020137790223785 0.6499864897933065 0.5745158999054709 F F F  
0.2984105609750145 0.2791134374023727 0.5374191156961956 F F F  
0.6047234534854127 0.5250849267313811 0.0555487665531729 F F F  
0.7759677824998548 0.0314460852894385 0.1548933022771735 F F F  
0.1135118164502202 0.7718661657187411 0.6528547380075551 F F F  
0.1106871048485445 0.5259893504133899 0.6528102073970530 F F F  
0.7772347201284902 0.2741357901050492 0.1570347196338204 F F F  
0.5944845764674511 0.7614709972551736 0.0337425127024034 F F F  
0.2707234101186486 0.0397400029206523 0.5448164958739312 F F F  
0.3253365949012590 0.2560300594410450 0.34448802944455643 F F F  
0.5707106455646027 0.5544792638546170 0.8638313724266311 F F F  
0.8205156834454073 0.0632142265851812 0.3406373422288667 F F F  
0.0644139853082919 0.7406601411340148 0.8346154027252055 F F F  
0.0560306308622174 0.5605728004992443 0.8281701726482282 F F F  
0.8330960062936086 0.2441876589575998 0.3339844780761680 F F F  
0.5767932608799740 0.7550037721495286 0.8323103785977466 F F F  
0.3225923504381001 0.0555391322187688 0.3598810898233609 F F F  
0.3932883710862285 0.1520924122122977 0.2733539944392618 F F F  
0.4960940017297020 0.6451638878860280 0.7718127683922376 F F F  
0.9006108145117224 0.1496000664830959 0.4305059390782731 F F F  
0.9914685417080165 0.6520243475110874 0.9350064696170222 F F F  
0.5553994751398512 0.5893098955242054 0.5683748581808539 T T T  
0.4079023482196125 0.6463984461322875 0.5994031480948078 T T T  
0.6893698212512407 0.7074653313191890 0.4764019990019938 T T T  
0.2414243082664838 0.6821143877416996 0.5438435325155864 T T T  
0.5892441546172686 0.7218815888323733 0.6078390540862370 T T T  
0.2670026175675971 0.6089694194233768 0.3905331198488881 T T T  
0.3174938239822442 0.5865690145474874 0.4615114164867162 T T T  
0.6224185609894377 0.4684380259719063 0.3044767481135793 F F F  
0.2711793074954585 0.3390515361464423 0.8017005706529616 F F F  
0.1215344582193296 0.8265158085593285 0.4047585525558333 F F F  
0.7714614017752552 0.9758701586265630 0.9022785230380421 F F F  
0.7736533485699155 0.3288293541867660 0.9027689000557828 F F F  
0.1238616471999805 0.4746383514554324 0.4048608244677538 F F F  
0.2759328759429494 0.9799335687890931 0.7953596952216415 F F F  
0.6253044196719060 0.8333350711118825 0.2856032384049669 F F F  
0.5208846133933491 0.4296255885942912 0.4593803666134875 F F F  
0.3780754248068305 0.3631319955053414 0.9550060575807552 F F F  
0.0226310074474512 0.8656942464035282 0.2489203377579301 F F F  
0.8741348342626623 0.9360740548888344 0.7486842577398818 F F F  
0.8751266284346784 0.3664707626528667 0.7498566908704163 F F F  
0.0230316696705870 0.4355821565190823 0.2514014038232801 F F F  
0.3694948112158443 0.9328846321251518 0.9543044031840822 F F F  
0.5203852179561110 0.8698523867203818 0.4388965956028841 F F F  
0.4675038037560881 0.4442315589945309 0.6756670884548654 F F F  
0.4332223022586135 0.3480019524264648 0.1660677520083382 F F F  
0.9730766330613108 0.8546458872571776 0.0312213937170185 F F F  
0.9205691484572043 0.9477050463890393 0.5300000148953359 F F F  
0.9238969316353973 0.3522992447620084 0.5312672350281744 F F F  
0.9711674154920971 0.4489466940331681 0.0341986672377175 F F F  
0.4176161726967322 0.9504129435710951 0.1722513964650290 F F F  
0.4669397606259835 0.8423428006081437 0.6498312511296831 F F F  
0.3145031268911680 0.4550596293830793 0.6504999261553479 F F F  
0.5846750250841168 0.3464278196700690 0.1537029868408339 F F F

0.8192778474754547 0.8514981959354273 0.0430338453191794 F F F  
0.0754929502196191 0.9513359537886927 0.5458637805867781 F F F  
0.0797139805791502 0.3507802499763528 0.5485317007643644 F F F  
0.8173614480971452 0.4516829976280761 0.0478991342047976 F F F  
0.5723618085928734 0.9557363192150916 0.1498978250628227 F F F  
0.3171502691772119 0.8553108724168297 0.6547474172403582 F F F  
0.2640957253322185 0.4305224631971853 0.4304507187564894 F F F  
0.6321026295465444 0.3656529416007146 0.9350411508125518 F F F  
0.7728242954525442 0.8606500618800084 0.2668261763456030 F F F  
0.1261480850831163 0.9392198695664788 0.7704680388963183 F F F  
0.1225475318128559 0.3634336894946344 0.7762629959221954 F F F  
0.7692007036768942 0.4392791998834937 0.2708765279627059 F F F  
0.6255081768074149 0.9388996150126587 0.9253132878471106 F F F  
0.2630855306845064 0.8655709592254723 0.4419266539623692 F F F  
0.4026228694242491 0.4673808130785275 0.3252993260400814 F F F  
0.4967192373064648 0.3211930819626048 0.8288166407961342 F F F  
0.9020573891618042 0.8228653989950985 0.3765571961853951 F F F  
0.9955016945147648 0.9779810622897784 0.8764686874945014 F F F  
0.9934050242535619 0.3240701350086752 0.8821924305509512 F F F  
0.9009540004228995 0.4759653127591505 0.3787025994907367 F F F  
0.4904787002161939 0.9565889474732430 0.8154785204694974 F F F  
0.3927955328931745 0.8287545185517118 0.3251108446648061 F F F  
0.6261876489775062 0.2269270648426698 0.2930134722540672 F F F  
0.1162140450908780 0.0733901592164869 0.4054077063808208 F F F  
0.7747822721728781 0.7290380038521249 0.9096797752722239 F F F  
0.7730987902814732 0.5733791296631310 0.9159824456433157 F F F  
0.1241171947406343 0.2272657656408157 0.4140209570353832 F F F  
0.2715990206088179 0.7307000855650330 0.7911789129949867 F F F  
0.6198855501753116 0.0696791921329663 0.2942583510968149 F F F  
0.5171860178996610 0.2696067782965628 0.4495224633663781 F F F  
0.3794837304282979 0.5205009176632842 0.9488374614274093 F F F  
0.0140720486631665 0.0219167251678840 0.2559592636979389 F F F  
0.8728495299246291 0.7794794388012818 0.7587438601124035 F F F  
0.8693090737485818 0.5229845834898441 0.7629990430690867 F F F  
0.0244423695576614 0.2781580329499960 0.2624121461935687 F F F  
0.3701830084733970 0.7760936923585930 0.9459635242866753 F F F  
0.5142578692538109 0.0262003433877354 0.4418236202520305 F F F  
0.4812569958660049 0.2205254401537076 0.6600106285250646 F F F  
0.4122623883807890 0.5697407586753798 0.1568558959938358 F F F  
0.9711057436661932 0.0725458414032119 0.0552672920709298 F F F  
0.9180636553777788 0.7276024952655860 0.5579487184505325 F F F  
0.9164383580816349 0.5734208220574146 0.5595340251007670 F F F  
0.9733283319284496 0.2280993204085959 0.0628788370454458 F F F  
0.4096503118364083 0.7254001271744315 0.1557569932311011 F F F  
0.4663168135835676 0.0650479320752169 0.6485899713617869 F F F  
0.3232340358276957 0.2371031314520522 0.6359018581638480 F F F  
0.5707426472240300 0.5691031248885281 0.1454511103325729 F F F  
0.8142239630634407 0.0745187812261321 0.0679229470088742 F F F  
0.0747024478310720 0.7281660731849584 0.5678266299087511 F F F  
0.0745878922776271 0.5717300615239012 0.5680731024923347 F F F  
0.8173326214727581 0.2311964382614278 0.0719248309220148 F F F  
0.5692715631224559 0.7255474946772154 0.1359337201268267 F F F  
0.3111388006124542 0.0806170260581851 0.6315834958291262 F F F  
0.2682345718720356 0.2784987226282922 0.4235089827719349 F F F  
0.6265328687884804 0.5229457523381598 0.9368634853422435 F F F  
0.7678655730822470 0.0189177544895571 0.2759053866300434 F F F  
0.1228741047231168 0.7800489948543330 0.7750774731806871 F F F  
0.1183200822077453 0.5215881375079974 0.7768164158498436 F F F  
0.7711307718559226 0.2812228721427985 0.2795119309334666 F F F  
0.6250327019687205 0.7777365076091840 0.9224376985169016 F F F  
0.2618967037303577 0.0247540045061427 0.4246839808775107 F F F  
0.3985504374786117 0.2295909134373986 0.3120539400932785 F F F  
0.4970879967618131 0.5703274513971266 0.8199559856354526 F F F  
0.8941345560558389 0.0727240528750670 0.3887373694100305 F F F  
0.9936125965940903 0.7284071994415768 0.8902480227769729 F F F  
0.9893361426288863 0.5750860940268510 0.8918895008387437 F F F  
0.9022478633893911 0.2273626110451730 0.3913338463145450 F F F  
0.3940473333162799 0.0744074848406342 0.3121245978432157 F F F

Structure 28 S=10/2

1.0000000000000000  
20.1473052208877697 0.0000000000000000 0.0000000000000000  
0.0000000000000000 19.7681594983396742 0.0000000000000000  
0.0000000000000000 0.0000000000000000 13.2309279702280254  
Al C Fe H O Si  
2 1 2 12 199 94  
Direct  
0.2666147295653224 0.5718081363665362 0.7968304385020759  
0.4962839191900483 0.7337266995120042 0.8133887606930612  
0.3876636228957219 0.6766607010750739 0.4017215659011842  
0.3160533615471485 0.6197782197404330 0.5977513239907261  
0.4904479892367002 0.6603162635830073 0.6225920200484103  
0.5333738071859737 0.5955649758366547 0.4418082300311610  
0.6449910515012270 0.7623271178619202 0.4792884357519447  
0.6189589599279375 0.6939666222568451 0.4396006786365880  
0.2081539914731840 0.6935939911927753 0.5749917615751554  
0.2393867350670080 0.6673087435877620 0.4716832697752740  
0.6075731739168320 0.6748064793048953 0.7083831131422880  
0.6193482461384155 0.6833207516125591 0.5873808568183209  
0.2273681213613139 0.5664943826901143 0.3807298885790932  
0.3969732106522314 0.6241610635379040 0.4207053310631357  
0.4047805805799063 0.7171211295255432 0.4508777219643386

0.4855732768021089 0.6555697064079604 0.4163834938118515  
0.3488450799868880 0.6868564635959060 0.3472512636044208  
0.7008202485575642 0.4731993823495469 0.3136361254746661  
0.1906028343857901 0.3309128462588199 0.8166764447559477  
0.2048900423452281 0.8219731815734370 0.3918505848947904  
0.6930749295575502 0.9788665097902717 0.8854847751135284  
0.6920736497540605 0.3230424226293798 0.8921410667071166  
0.2012781417648670 0.4790710817435705 0.3948425154948793  
0.1976330798657831 0.9629850864698165 0.8060611771655970  
0.7025824277592359 0.8196134841945953 0.2934418511193392  
0.5881792300977637 0.4680643597068910 0.4172747852911171  
0.3037446745616300 0.3367745985252961 0.9140435348143158  
0.0929506657032462 0.8336173764325616 0.2891459157675504  
0.8082431130187586 0.9717661514994574 0.7872800554659718  
0.8035029688387931 0.3331245568599439 0.7907145884388382  
0.0905213243835999 0.4648572994228511 0.2917401606035415  
0.3114124459725156 0.9824790142349750 0.9025098577148131  
0.5960091773705968 0.8372862804140159 0.4023285460499583  
0.5963556923314289 0.5426202659331512 0.2530913106751358  
0.2954373102387172 0.2696585134424219 0.7395985403029757  
0.0967135676711960 0.7568803891925167 0.4532595871094803  
0.7968804437403703 0.0435902084500306 0.9556333662434668  
0.8009638690150247 0.2605024960480651 0.9593305214248803  
0.0911452042262180 0.5390898764084201 0.4581922387184632  
0.2871864613934368 0.0497642012373185 0.7362098007505010  
0.5888441446750348 0.7599815989966736 0.2409798716783256  
0.5961131123252772 0.4070615552447412 0.2401046568650111  
0.2895206416343906 0.4052936543424708 0.7446111615075033  
0.1050671263927657 0.8908175312218825 0.4700756025305160  
0.7946395796541955 0.9084770599884968 0.9607462809954322  
0.7913436868789346 0.3947887241370294 0.9681980393309707  
0.1024011952798446 0.4053154168520610 0.4715936539069404  
0.3111891300830738 0.9178842609354187 0.7258454245886876  
0.6037983711497733 0.8941652956548933 0.2200468689101392  
0.5205092767089308 0.4484822781881689 0.5834510485389075  
0.3761722638403859 0.3548771635051949 0.0777834139337625  
0.0242821409092478 0.8609087498985476 0.1249678637449482  
0.8731422928737212 0.9365254425855428 0.6229572401850513  
0.8726567936091532 0.3612946176690829 0.6268213137113151  
0.0213382904507327 0.4387567376503758 0.1274926270357202  
0.3686960470423921 0.9455918794695866 0.0760214931386710  
0.5257889218070004 0.8612439665921033 0.5652844996630066  
0.5174808697241946 0.3541739249755262 0.4370092437199004  
0.3855369662892188 0.4434642861714346 0.9262869792406494  
0.0142174351051907 0.9416259773915521 0.2874618752132881  
0.8786257523189539 0.8575964112676397 0.7870873498817972  
0.8793039656322859 0.4430372474720391 0.7885075872481279  
0.0134796092866524 0.3561214692925864 0.2887465247739479  
0.3436704957902377 0.8566738028940617 0.9287267954382782  
0.5233112803827639 0.9486985851381957 0.4085555897789581  
0.4567909273098952 0.4729994455462513 0.4142688615852658  
0.4334738995863989 0.3196212190525450 0.9050961818662540  
0.9616554564370828 0.8204350482526268 0.2920803164587960  
0.9412360518229796 0.9739506724799248 0.7850274554149291  
0.9347772280158856 0.3229168442333180 0.7940125208602390  
0.9591521489414745 0.4766653389020857 0.2956951400928572  
0.4405018652660332 0.9492725465340338 0.9125151517271599  
0.4643117322024367 0.8303857999767372 0.3957056657699413  
0.4764010091501491 0.5198419948574026 0.7366510632166567  
0.4256366537146944 0.2775330576510742 0.2216400838828443  
0.9841357720364827 0.7792048998604071 0.9810565261568278  
0.9117466292574855 0.0212886057446613 0.4818013733613398  
0.9101012199142924 0.2740692999748365 0.487347782470594  
0.9796956276723071 0.5228760871070213 0.9863955729861335  
0.4143927023217731 0.0350634451598317 0.2066923975602634  
0.4843670246998095 0.7617822218759094 0.6856468372458265  
0.3928837684601152 0.4422037396773288 0.6314649564399540  
0.5060350566719989 0.3554220549959979 0.1156101558466279  
0.8989754721211837 0.8662380997077306 0.0670921663710706  
0.9988636615857538 0.9363001778384824 0.5655086224282801  
-0.0012625694298726 0.3574740957046859 0.5708519878041093  
0.8950952291887191 0.4366654396211740 0.0752160125343920  
0.4962388695633259 0.9419709129557303 0.1297309329079075  
0.3976536198436990 0.8534097466945482 0.6116195256070286  
0.4841206884142978 0.3860381060753929 0.7490413116734079  
0.4241374337815110 0.4109392092599419 0.2452581327399410  
0.9937790414482740 0.9102880998947600 0.9441871632834056  
0.9044470406483063 0.8902407758707430 0.4418597334953286  
0.9059395669074141 0.4051566790491373 0.4458728786382432  
0.9872876083225284 0.3911698230824910 0.9482283438460841  
0.4016772123957931 0.9084935197224788 0.2614014077911570  
0.4874672327336194 0.8866900531554720 0.7514667821765133  
0.2992391831136027 0.5317598356421954 0.6855414932865647  
0.5971597517982030 0.2761731634520965 0.2004952161198146  
0.8159812179698018 0.7764682242081548 0.9910518031800625  
0.0856978679283622 0.0229236035703917 0.4871775578778149  
0.0907391345210993 0.2729508927040287 0.4999582584184785  
0.8093796880349570 0.5257597358046822 0.0028753212992801  
0.5852478250439360 0.0265334622726554 0.2061480568501864  
0.3058732474620969 0.7827804797626708 0.7087872155607640  
0.2720387614289975 0.4333119327727593 0.5534538799695474  
0.6317528649168572 0.3631038850508239 0.0591370082058247

0.7756886816809807 0.8569581005662987 0.1385547820938098  
0.1197707438244368 0.9503545705066484 0.6456433599617230  
0.1196633042927460 0.3530112661568495 0.6521027515127000  
0.7721757070558352 0.4438534904095595 0.1502330170700494  
0.615745637286267 0.9541606116747369 0.0442905188475517  
0.2707485171912757 0.8613971815605614 0.5563865701594755  
0.3299258781417375 0.4458540414291432 0.3714229123096611  
0.5629842502293685 0.3385139333656515 0.8927290866089860  
0.8313247472837899 0.8208796246762070 0.3117307370028844  
0.0697908744571853 0.9842849744522355 0.8242336290546531  
0.0631875373050114 0.3169698244248739 0.8258269983008157  
0.8296251758825782 0.47742278688201438 0.3230501758821582  
0.5660868635243065 0.9646570892132271 0.8599965443114096  
0.3336975736934598 0.8315965862733782 0.3862523387738867  
0.2401772118938247 0.3538861853837180 0.4017430383162273  
0.6414778509796141 0.4467825055508480 0.9034210204643696  
0.7665466548421312 0.9375655301595580 0.2992788694830172  
0.1136513461037755 0.8599994405436949 0.7951890434438839  
0.1121811388848498 0.4399307587165684 0.8053550848909788  
0.7688208199392847 0.3588317655339787 0.3068555285337900  
0.6421365491605953 0.8580060135098980 0.9073578024247150  
0.2602738440076978 0.9436164063109299 0.3986691623793396  
0.3949698783183747 0.5407382406410617 0.2732021135149278  
0.5042395416039174 0.2545417745254579 0.7690677856692492  
0.9046049482286769 0.7547910339421746 0.4398778986367043  
0.9820445431804876 0.0451775567908113 0.9390249161686506  
0.9819572056758197 0.2558789215348420 0.9485350562432991  
0.9065410183384451 0.5408345876108245 0.4489635650272876  
0.4719864574374844 0.0215715985234223 0.7536286667036098  
0.4060279253946012 0.7735215447559912 0.2457647351609547  
0.7019337520780008 0.2443704703313211 0.3168549547951591  
0.1851773154639583 0.5519921354212438 0.8203610634433035  
0.1961041031303202 0.0602481732036164 0.3853252930798146  
0.6995582496189319 0.7375263370547664 0.9113196967016954  
0.6934361749219983 0.5690758269647092 0.9272844849511285  
0.2039693824331274 0.2275856806815101 0.4136690142581418  
0.1939598720341931 0.753412608052053 0.8069907193100911  
0.6967842241091849 0.0502221395237533 0.3103930163186282  
0.5813550569220698 0.2408549779595647 0.3934697571713399  
0.3160271042531497 0.5573191452859116 0.8998572507198977  
0.0838635852881858 0.0558097818881995 0.2913646306087566  
0.8053525733065541 0.7456043913469019 0.7962883609886111  
0.7950824550318752 0.5470070920072185 0.8048835672055700  
0.0951280682236129 0.2503384950717771 0.3023564321251460  
0.3085516346572156 0.7307378388173309 0.8940782631506105  
0.5821408820812313 0.0671430593319959 0.3998391796777694  
0.6171021219330238 0.1509806586887510 0.2536213096913308  
0.2730611115803916 0.6540732226869738 0.7405112886855096  
0.1008677927643639 0.1484531002383858 0.4350117754942357  
0.7972918460767802 0.6499565674220024 0.9378949884927278  
0.5251482784179622 0.2539827213587685 0.5716560039538197  
0.3716897359553698 0.5306602141318042 0.0781450727731807  
0.0135488691258938 0.0238964486270152 0.1301963581889835  
0.8759493313263318 0.7728283182440838 0.6330188027681107  
0.8708126152680553 0.5314771941069582 0.6405852575593982  
0.0193678497306575 0.2681611886666974 0.1395587094733531  
0.3675040472551339 0.7622204075713671 0.0622686233213955  
0.5146710247866916 0.0308941163114796 0.5649131761605445  
0.4485165715881134 0.2415805060637171 0.4116856342994398  
0.4476949560301188 0.5601880084812935 0.9247298763400250  
0.9527399087894514 0.0602217513494464 0.2996833067519162  
0.9368881979191698 0.7377300787382820 0.8031182201911858  
0.9240792815757695 0.5676473195775678 0.8162449048120113  
0.9639893533727456 0.2335253041177461 0.3138134040971925  
0.4378040352727930 0.7654653044503918 0.8932993915994601  
0.4503167240781089 0.0604436283712827 0.3971823886513626  
0.4955533068946325 0.1411857982529483 0.6725262366266662  
0.3896210854361485 0.6514341963098759 0.1661075767989710  
0.9961962041554528 0.1483063125715055 0.0626685688281967  
0.8943704992704981 0.6500910277967935 0.5600872868258352  
0.4034086743231933 0.2360984085215624 0.6402851149052398  
0.4910997058785678 0.5675612165811733 0.1424975959324949  
0.8933835898436286 0.0658870648941162 0.0859268870876923  
0.9963764489643242 0.7346740815367097 0.5809547831344958  
0.9950735291332109 0.5656304095769631 0.5923153310776682  
0.8952153432534800 0.2331920909313454 0.0951201436540529  
0.4919546775430876 0.7279933055057318 0.1116598628836329  
0.3920154335670792 0.0679284144337249 0.6126905666350516  
0.2950787277070208 0.1587051027550576 0.6255024573144141  
0.5970021391516720 0.6484080701704356 0.1309557877954950  
0.7912250263689907 0.1510551988579018 0.0741084640832969  
0.0987075289562799 0.6486009382085722 0.5692582900740740  
0.2974137539759273 0.2777941487206914 0.5395190005421192  
0.6009810679997345 0.5241712034174932 0.0542742435275760  
0.7760144574680770 0.0285761609218580 0.153003835922872  
0.1152060808418438 0.7684594321873607 0.6499475117815426  
0.1139451276976381 0.5276244685189369 0.6546276857441345  
0.7762474824535138 0.2724069331124168 0.1550366645162209  
0.6083332996975945 0.7700964357855452 0.0452181929757780  
0.2755764649666080 0.0380573962567674 0.5388278272270622  
0.3241688048665420 0.2562839151444682 0.3461405156469592  
0.5722131949587536 0.5576357491343760 0.8626767865413206

0.8246473843796186 0.0551407324091169 0.3376729004735476  
0.0658816293723988 0.7382135683961111 0.8331862130027050  
0.0542202195977465 0.5581803245601117 0.8269716050438288  
0.8325050241861535 0.2425039498349436 0.3310191947922570  
0.5775813875777225 0.7468266953983466 0.8490412630386124  
0.3233966252755679 0.0566674074747802 0.3513559498108565  
0.3980736941590527 0.1552059466755728 0.2794650428319749  
0.4897926704565007 0.6469099492668277 0.7852718090872374  
0.8983851147572630 0.1475742383571951 0.4281526164033011  
0.9907629953657004 0.6510243147019944 0.9329011581932330  
0.5255737251960916 0.6434488823268618 0.4563232703325892  
0.4051934514980339 0.6350778656107664 0.6064613484921142  
0.6508287637070200 0.7134328662999374 0.4874136694110837  
0.2494756787688640 0.6920751311321006 0.5366240041941607  
0.5920584896005247 0.6596968013714584 0.6420875605564955  
0.2580536446301451 0.6039387465787557 0.3974055520856684  
0.2962157985509543 0.5696313545350926 0.477237256725363  
0.6208531407721302 0.4720543574500358 0.3044027042367037  
0.2700459253102226 0.3354876190267573 0.8022792063380015  
0.1248463166124972 0.8260742421617676 0.4015317467287438  
0.7729018490736771 0.9753227823321049 0.8978896484697182  
0.7720978756163762 0.3277447806486813 0.9036403021438163  
0.1206437328645480 0.4711792113759964 0.4051987773613675  
0.2761005000183590 0.9774725633093129 0.7920354490195124  
0.6229092915805311 0.8282858974710356 0.2858211543166752  
0.5205257494412556 0.4341873189432621 0.4630226365966031  
0.3746129174545059 0.3646004417928997 0.9558520357367526  
0.0231648409359899 0.8641631866978262 0.2471806713660531  
0.8752059032558678 0.9351365790214425 0.7453250694060712  
0.8726195353208416 0.3652485816845787 0.7490930757274122  
0.0208454201114186 0.4338728280890716 0.2495634684054386  
0.3664404666882017 0.9332156589405778 0.9547362480053216  
0.5266463371103326 0.8704028838847202 0.4439599546645203  
0.4676921701551296 0.4493747409803638 0.6766781252965530  
0.4321669070666494 0.3498241355969121 0.1653176934502042  
0.9750102512871209 0.8541650925716451 0.0283036263356144  
0.9225452518185677 0.9460271630524074 0.5270941455150160  
0.9224170764830159 0.3494177488788006 0.5319410903831422  
0.9705661875911011 0.4476388091964866 0.0328908050818062  
0.4207760611024269 0.9576008775059834 0.1675287713884364  
0.4729093957433515 0.8401969848337747 0.6531792417595789  
0.3139905197603258 0.4536846922375402 0.6530320285950053  
0.5826233781996957 0.3504871657922159 0.1538150511999933  
0.8216172353251374 0.8519372644357425 0.0385754222489474  
0.0769580821653872 0.9502779520634028 0.5420954404230371  
0.0775413076482630 0.3470430541253431 0.5486863222711517  
0.8172256663785213 0.4501072516365873 0.0491092587739700  
0.5749507122589459 0.9544780230992461 0.1493792822945197  
0.3209561214812288 0.8534311338892301 0.6514928097727898  
0.2627631201815281 0.4304622389906781 0.4323532637779820  
0.6313982861222291 0.3681835434547071 0.9364728814819142  
0.7695963303762262 0.8596690854937901 0.2603803304695682  
0.1253922772125883 0.9391089127553843 0.7669081984170880  
0.1214690600955600 0.3613923290088783 0.7743250237770452  
0.7681631278424224 0.4376724362198599 0.2724384898018257  
0.6284319965709886 0.9377211595863997 0.9253706062911594  
0.2677060433381378 0.8652379974133501 0.4337601963617439  
0.4006874675857003 0.4672891414295626 0.3262386016219217  
0.4961796879889281 0.3254980572650841 0.8290430021774214  
0.9007788484480995 0.8228600364283035 0.3722562392617229  
0.9966419503772865 0.9774054703270173 0.8739470643889932  
0.9918617273178203 0.3230073353940346 0.8803814158169856  
0.9004831630192714 0.4738719146346022 0.3795652835302304  
0.4913843548906892 0.9551922321490977 0.8185827759888922  
0.4008559630281248 0.8369327948309786 0.3206053641338651  
0.6244692216486151 0.2287127091436204 0.2913555652211251  
0.1173635480020075 0.0715285189419234 0.4007406955390142  
0.7787090436917431 0.7276550444550539 0.9098370285970465  
0.7734291150392235 0.5726589258357973 0.9179744802003340  
0.1232892841258248 0.2257807466869678 0.4124500645724385  
0.2702210815460841 0.7304573389791462 0.7867368359809414  
0.6206978872915124 0.0731613325842246 0.2917560573479329  
0.5183054992938755 0.2726371758340236 0.4527796395839674  
0.3775525288315207 0.5235342913823181 0.9553517627135595  
0.0160118532218854 0.0204185547937951 0.2527342328441945  
0.8743141237552853 0.7783518875345938 0.7555146451543095  
0.8671892739171093 0.5223288616081486 0.7624664824491251  
0.0233493451821034 0.2766796523183543 0.2614525854842755  
0.3666331566173384 0.7781062350800390 0.942225259294834  
0.5175005286628870 0.0274678474102638 0.4425799242290371  
0.4812514477404067 0.2214333388126774 0.6628788268848957  
0.4119494560144449 0.5728009466787620 0.1634911466771070  
0.9707812383999596 0.0710777604866201 0.0534621196743273  
0.9180784115903540 0.7278207132710542 0.5530048328658742  
0.9172806770643169 0.5718072126484701 0.5604492007960119  
0.9726224587012224 0.2264452717157793 0.0612098979219333  
0.4145422645529979 0.7281191474272509 0.1458938966784944  
0.4683357256737185 0.0656238071680564 0.6513679963387682  
0.3231083601133121 0.2353433556662553 0.6368764703135039  
0.5709186966200376 0.5710636540012696 0.1441834000796905  
0.8143157456958354 0.0725358296824771 0.0669692398531927  
0.0751734225448460 0.7272844013614097 0.5629198550406773

0.0741361823300845 0.5698337077429607 0.5694091762410541  
0.8163227136183246 0.2290860252109530 0.0702281925404915  
0.5711933564497343 0.7264248045654945 0.1312773657119407  
0.3128970780214417 0.0787678386943927 0.6286263505431264  
0.2669330497025835 0.2781813049420941 0.4257229793333176  
0.6265343884816790 0.5242969232123087 0.9372305251150231  
0.7665961403171910 0.0179935235894508 0.2743783094611239  
0.1219090285051814 0.7800047069682996 0.7720116121776053  
0.1181746627657514 0.5201260309762022 0.7786296554210191  
0.7701109449130513 0.2792442633968722 0.2775517497017360  
0.6300832291804180 0.7776931021861769 0.9266113162967327  
0.2646625859223249 0.0244054517898900 0.4189561585023779  
0.3986678191221654 0.2331508091766688 0.3155917176971053  
0.4958616376539124 0.5707338686575082 0.8282684332248568  
0.8967752579506471 0.0704432242466155 0.3866778489749805  
0.9944779941898115 0.7272425789793550 0.8878124034347185  
0.9879455945849569 0.5737497188775866 0.8909258321797301  
0.9010717054726125 0.2253929552069281 0.3897562203883752  
0.3962818994903945 0.0761077213725176 0.3092090328298635

Structure CH4/5 S=10/2

1.0000000000000000  
20.1473052208877697 0.0000000000000000 0.0000000000000000  
0.0000000000000000 19.7681594983396742 0.0000000000000000  
0.0000000000000000 0.0000000000000000 13.2309279702280254

Al C Fe H O Si

2 1 2 10 198 94

Direct

0.2728751365043396 0.5726716355497834 0.7839929237069085  
0.4938016854347007 0.7339669080288068 0.8141170255957043  
0.5007478258065676 0.6518258630181496 0.3799852910934767  
0.3248194608841208 0.6247528898564120 0.5886850483142435  
0.4989426373559729 0.6645658575802973 0.6201870346470666  
0.5480609230989162 0.5510160480080268 0.5764298257922342  
0.2017166021862612 0.6739503752094749 0.5774810201250220  
0.2372593914942021 0.6631596741238912 0.4715368301437447  
0.6020558288360389 0.7386010582726017 0.6960907072338393  
0.6232944074462218 0.6792220791544971 0.6223774578844784  
0.241481899578083 0.5642912236460705 0.3786844879328251  
0.5356173205041732 0.6095227273328284 0.3781589880353253  
0.5226337258511438 0.6934005734574856 0.4238423927938798  
0.4532028849398937 0.6357586075493599 0.4119946609434103  
0.4923640526497202 0.6712512362649847 0.3037007416650129  
0.7028141183485977 0.4728112609732077 0.3115094269124457  
0.1935942730386706 0.3331126201203802 0.8121359511823152  
0.2030978183593959 0.8246732548365774 0.3976301913941568  
0.6925203335513150 0.9820598224681849 0.8937438708839119  
0.6943115625946299 0.3217078359438184 0.8861603702084556  
0.2055805960833094 0.4802562478098175 0.3882274907738072  
0.1959315756970217 0.9729130483879456 0.8088803616188841  
0.7046596989265999 0.8235636677095907 0.3064630545181565  
0.5883840685837733 0.4671544937077878 0.4082992874374390  
0.3069601024596060 0.3432372847607715 0.9075496379786580  
0.0938070094403117 0.8351183710066082 0.2899072881629688  
0.8048276502162516 0.9706085763431713 0.7886999353852634  
0.8069518615807052 0.3315460884400528 0.7876233204117392  
0.0931396864311841 0.4671976198712712 0.2892388432748595  
0.3096591529870353 0.9808050654488395 0.9106428194188955  
0.5922536103441263 0.8359845119401009 0.4028551356241052  
0.6007634362417780 0.5397148647040995 0.2394637256356187  
0.3004220340177310 0.2770020733458881 0.7331675665149601  
0.0939845717441864 0.7591331284450571 0.4557289726169130  
0.8005615160485782 0.0441008082766420 0.9557364224671010  
0.8027123349112553 0.2598231740470089 0.9569837007589381  
0.0982613408220563 0.5438374059726199 0.4547928037553414  
0.2920996713393172 0.0541462153404071 0.7463083583021280  
0.5982684542034841 0.7596524730434566 0.2370354825650937  
0.6008475571694468 0.4037137947005486 0.2351356632189734  
0.2882870475212478 0.4126777105841997 0.7393074703135528  
0.1010743092547518 0.8933202831202407 0.4699770536160590  
0.7940796768328329 0.9094843601396816 0.9645570638794965  
0.7931983986136436 0.3941267937255130 0.9631338303597459  
0.1067506941321348 0.4093633262366270 0.4699339639024259  
0.3077963923073846 0.9216407362747058 0.7319167480667081  
0.6076771571834676 0.8940826105580185 0.2227769455821545  
0.5204032224979864 0.4548918621828596 0.5755514813415884  
0.3806411048760593 0.3558366959095728 0.0693988647305778  
0.0222707977947170 0.8608614630848425 0.1273978380584664  
0.8720377656654575 0.9385443849799441 0.6254013336850189  
0.8761944676870363 0.3633069032856033 0.6261714424621024  
0.0203887851509306 0.4407988325907403 0.1283668888838069  
0.3691009348318233 0.9415274823177490 0.0786173071213169  
0.5206757115138559 0.8603077028273571 0.5660432199823284  
0.5129231600550771 0.3567870681715407 0.4348037070814729  
0.3960794260310921 0.4438339767970625 0.9168473347953795  
0.0130295589215370 0.9420562641408706 0.2887073731919442  
0.8782439581152492 0.858455839751907 0.7885199980245228  
0.8807705941341564 0.4433216727421494 0.7897329576948021  
0.0159835522525414 0.3581177290771919 0.2893001008811675  
0.3526558858131464 0.8559320735750966 0.9240596739689636  
0.5141554663208042 0.9444267336177898 0.4072942764540264  
0.4564471237114714 0.4758897464125662 0.4058452149871156

0.4356725093018874 0.3186526697366862 0.8944108270862777  
0.9637189048174448 0.8195731576554544 0.2978414997749451  
0.9375659739239377 0.9763728002256522 0.7905440515482551  
0.9383525885977642 0.3240945496654263 0.7928953734981919  
0.9630946852236519 0.4798340766044988 0.3002799856268700  
0.4410998119749636 0.9559025537030644 0.9155674701133062  
0.4623293695234926 0.8219794467880772 0.3956577385663777  
0.4690342606160336 0.5194835001985375 0.7317869786734318  
0.4243757936602444 0.2751861391606593 0.2130293007938375  
0.9802610727224367 0.7789692536726218 0.985098074723475  
0.9102719888216120 0.0221215186085456 0.4822544500490573  
0.9120500844122843 0.2762266838924333 0.4861023488570600  
0.9803907954886286 0.5240172783103845 0.9853657451594661  
0.4095170142848883 0.0256862122462848 0.2181739499981639  
0.4743310893804609 0.7654187100213935 0.6916696656167468  
0.3936412674945162 0.4376439051260866 0.6227399039030215  
0.5090868840168139 0.3523506025728034 0.1129704328386876  
0.8957782049404257 0.8648886364438312 0.0738775675900465  
-0.0020742766225897 0.9399489127727582 0.5713945587983793  
0.0011854747404881 0.3613769808732334 0.5643904225333307  
0.8943009562857025 0.4390332048356532 0.0733438988949701  
0.4952429509858528 0.9371316247746112 0.1395597769542251  
0.3931510682564734 0.8601817948109871 0.6133872056118774  
0.4886335943983709 0.3858760122343246 0.7386377527133267  
0.4259375111388590 0.4087549407810306 0.2406226900385859  
0.9887682179128494 0.9101378360236296 0.9482797688366568  
0.9061967392100694 0.8903187114963704 0.4462729257061200  
0.9050253646167243 0.4072447718387319 0.4442722966501946  
0.9878810786598875 0.3921256320285024 0.9495188893788891  
0.3973648927867273 0.8948209908638718 0.2588827964399428  
0.4836506348143919 0.8906948803104114 0.7529196492330565  
0.3057609740845857 0.5357959923723918 0.6689241720216659  
0.6018831869840851 0.2727758866743228 0.1926569344389156  
0.8110266938370260 0.7773234868159119 0.9952364725798457  
0.0867874026395280 0.0253978440470930 0.4961662664908897  
0.0947422474252944 0.2765549170954259 0.4988410046497799  
0.8058119418781724 0.5255373130074210 0.0008513245781479  
0.5834186732058496 0.0256801483317374 0.2083797713670553  
0.3050886405557584 0.7870423285829198 0.7138828721019184  
0.2720748295700860 0.4346381027078811 0.5457757720727807  
0.6338104859334738 0.3614931759892063 0.0527018137532038  
0.7715686856344052 0.8580687532766323 0.1427900070829594  
0.1201610482843801 0.9466263404604147 0.6489909574435078  
0.1201371305862595 0.3574636138013491 0.6511238422933663  
0.7700816845798962 0.4401481302003463 0.1450309316337097  
0.6113860089451643 0.9541470973484448 0.0464275212069171  
0.2644133931768037 0.8652519875152903 0.5649283377193074  
0.3314493290536799 0.4426507639152740 0.3666670431721584  
0.5650514363138051 0.3397374031439700 0.8857029202975224  
0.8337196343402143 0.8235253530865198 0.3109444390774753  
0.0671798310356303 0.9781897653238160 0.8251248392407247  
0.0664217910873790 0.3210567257089271 0.8270016154042996  
0.8325452096212923 0.4746285650989594 0.3108949596305018  
0.5668417892106549 0.9644353075291326 0.8593010027316307  
0.3319793591642861 0.8316740265382606 0.4026341414962389  
0.2403164445538870 0.3510751671368258 0.3958940740543783  
0.6456587813232360 0.4460319102050133 0.8984937887859425  
0.7706867237808354 0.9406052271792976 0.3022039665728221  
0.1272652421110295 0.8591421675683760 0.8023539458700334  
0.1173917203421305 0.4434263324098103 0.8061719966743983  
0.7679064962369511 0.3574034162599176 0.3056626942883761  
0.6443792009109248 0.8596336115083036 0.9108256516310560  
0.2607494802675182 0.9459528764121957 0.4047036948400963  
0.3892596169829825 0.5381190520814925 0.2626901907294546  
0.5082057914851658 0.2542633079220417 0.7615005549751911  
0.9018919823672287 0.7551654821670829 0.4422506090259981  
0.9859908788052092 0.0455391201950831 0.9416858005106585  
0.9860182366541252 0.2568368692423598 0.9474376745970364  
0.8986123506847883 0.5431072770210863 0.4439416361514278  
0.4739707081999870 0.0263370808869159 0.7562919923584919  
0.3886411231169130 0.7586895732841091 0.2633670167641756  
0.7045981670549698 0.2396744408314361 0.3118619439257024  
0.1902843106997601 0.5566243143667099 0.8005456969298205  
0.1967279463923019 0.0628590606160548 0.3939943491922356  
0.6956975465563829 0.7369324116749092 0.9125769528657516  
0.6935672066397290 0.5699600893587292 0.9131680468922627  
0.2052037759860688 0.2251555223415326 0.4116158178159701  
0.1926820324989512 0.7419209736685939 0.7986614692194782  
0.6976177380802754 0.0516561467143085 0.3067790134141486  
0.5844471835241805 0.2488819590196504 0.3887207645357445  
0.3200837685176698 0.5524002413952399 0.8863078224856668  
0.0851031532804171 0.0542478354793163 0.2983994724078885  
0.8035127514143552 0.7476541633707968 0.7997910005648965  
0.8013796096389922 0.5508699845737087 0.8030494218559032  
0.0965785618296281 0.2513566919728076 0.3020541346615520  
0.3055911253740704 0.7336180993864057 0.8985743962615675  
0.5850395151126221 0.0580322065949735 0.4041737993281905  
0.6125178196557192 0.1493052240793994 0.2612258463731348  
0.2860228619467665 0.6561319850760958 0.7366270068003697  
0.0996621712488517 0.1503734640756335 0.4373321610648142  
0.7954485472401996 0.6511791013313382 0.9395211936979879  
0.5264934052521903 0.2554224937159792 0.5646117559920470



0.3716013006477281 0.5288100364110560 0.0670712379706183  
0.0169369448588240 0.0262545105659897 0.1335694897174901  
0.8744593772455331 0.7727974119420965 0.6358441433913788  
0.8748162876310380 0.5289029896283306 0.6383203945190319  
0.0211997788201136 0.2705334918709137 0.1391431210413801  
0.3647423228686941 0.7668132688716667 0.0703979609188787  
0.5134339281775926 0.0256737233756649 0.5661603439026358  
0.4512389367156860 0.2407229199423467 0.4024983505894932  
0.4507735791278032 0.5647168159226835 0.9183190409260336  
0.9537112624227162 0.0612644922077470 0.3015323804682585  
0.9358227305318699 0.7385706626282249 0.8053379090353147  
0.9318648134796256 0.5664364721098595 0.8093640509330702  
0.9656031156815337 0.2354659421994051 0.3129505475275431  
0.4376561444907596 0.7526997169098865 0.9060822893766186  
0.4537898195439275 0.0639601232588975 0.3987126640584459  
0.4992879729610747 0.1413743203953654 0.6625098455096569  
0.3903600371115031 0.6483230307206104 0.1528143857310002  
-0.0005987697931246 0.1498910391647615 0.0631891182872492  
0.8886913084287967 0.6501525897380372 0.5613509526048183  
0.4058541426023085 0.2357287113729537 0.6350869330781186  
0.4901031323042639 0.5595025526235379 0.1389765761978931  
0.8966505735599620 0.0672701634316907 0.0868936963093669  
0.9937812347254288 0.7303756161961903 0.580999500717424  
0.9942619997914539 0.5699979996726233 0.5745968945905312  
0.8978469633189099 0.2346035907643098 0.0922248940653412  
0.4876220155135952 0.7386719649320278 0.1336483988569326  
0.3925871679649758 0.0696517949914034 0.6142351377259613  
0.2958257157704018 0.1609188879732434 0.6298057862458912  
0.5878185439798023 0.6495487507008887 0.1247424921262007  
0.7941091273033344 0.1515081012505591 0.0740175391173936  
0.1006460171488272 0.6509436162768156 0.5732414478855630  
0.2996555962828655 0.2771444031535389 0.5339893605506701  
0.6001006087889775 0.5279151094067929 0.0411485022983150  
0.7791069246007963 0.0290658538732993 0.1527821032521027  
0.1084260624283633 0.773212826822429 0.6531135110054196  
0.1069733561896037 0.5270049009027185 0.6522514474844695  
0.7792338187358536 0.2731611503091941 0.1529457984621978  
0.5977441152226426 0.7697866515748473 0.0378931921666172  
0.2740920689339091 0.0384810048742537 0.5495993316978196  
0.3254057172867814 0.2534498047070847 0.3412202157157967  
0.5731853943131890 0.5517602842324173 0.8462798790129522  
0.8250518842468191 0.0602226842640816 0.3374248475261941  
0.0651539056483565 0.7433191150028304 0.8390739672990704  
0.0615778552901618 0.5619112262822662 0.8343174368110514  
0.8344914286688893 0.2428018941624810 0.3302176620335477  
0.5760837557331283 0.7550099612421799 0.8384574920186580  
0.3247853020832585 0.0603038474889250 0.3652616681314826  
0.3988721593898326 0.1520435070505468 0.2742531290104810  
0.4936849605105559 0.6475164948002979 0.7753857041613844  
0.9012603522723646 0.1493665129620242 0.4297800908781648  
0.9910755371832456 0.6520542349445887 0.933175555177811  
0.5599012723589415 0.5980235867615120 0.5904277898639744  
0.4119194899854519 0.6487521255579707 0.5897676447956562  
0.2432953771510992 0.6827933820295872 0.5412888639465208  
0.5948074461240435 0.7192022613599182 0.6281511401693057  
0.2655104095771616 0.6076894325510696 0.3890242162253788  
0.3186951178082695 0.5868854012635938 0.4559509311361881  
0.6230279323633917 0.4709404332091823 0.2970468118637016  
0.2725930541894738 0.3411922798838942 0.7966058900814981  
0.1230060321724882 0.8281142439496667 0.4040991249217418  
0.7724519875642077 0.9761954130754870 0.9012734649323368  
0.7742436860884372 0.3265649035677271 0.8996948917304990  
0.1245261392973276 0.4745506108007414 0.4016839225083303  
0.2755154408233355 0.9818413904341666 0.7992453694114736  
0.6250220440583407 0.8281559747683392 0.2909798703300763  
0.5197354112629600 0.4372434872594532 0.4548316592709242  
0.3798195637222024 0.3661491823371006 0.9478277355954677  
0.0231178080113985 0.8645595269268439 0.2495521220826164  
0.8731334556425963 0.9361238662935050 0.7477862415968233  
0.8756204520427471 0.3658006491061139 0.7483299225892391  
0.0226543868829628 0.4360125067760566 0.2502147384811896  
0.3684089795221599 0.9331744060825470 0.9569905606998644  
0.5223027426179472 0.8660412410013478 0.4439193216130032  
0.4676825848922496 0.4492472060326764 0.6693921078089362  
0.4344435938813529 0.3482139192670229 0.1596975117014186  
0.9714084763829631 0.8538071818030462 0.0327549274500400  
0.9220045864816993 0.9477020738560199 0.5301535370340708  
0.9242227732490130 0.3518656486435598 0.5294111035354774  
0.9702722446233593 0.4491780198305042 0.0328757639128261  
0.4186353416530069 0.9496746162354328 0.1741931665576611  
0.4676930616443807 0.8436475137212904 0.6553992922629910  
0.3158181404220956 0.4552385727345481 0.6433038164352558  
0.5861650859632058 0.3477035644923638 0.1486833682592787  
0.8182539074733294 0.8524116322889932 0.0435833897092956  
0.0762334164311768 0.9514744433126546 0.5469101656010787  
0.0802413499028184 0.3508732920932738 0.5458813640214343  
0.8161459964739372 0.4497179333316254 0.0455457691432141  
0.5738888270762081 0.9525157528398575 0.1542317584796517  
0.3174247097787751 0.8581129466257491 0.6566139878719615  
0.2637367340138696 0.4271914272606594 0.4248353074745245  
0.6340135124262906 0.3675248470590082 0.9303924505572267  
0.7701102711960943 0.8622240059623915 0.2652707170777151

0.1275256895336874 0.9386688666107333 0.7705659097512612  
0.1241127453987853 0.3648908982469739 0.7732567370859355  
0.7684092250343030 0.4355756672480246 0.2676129528020889  
0.6278319897796485 0.9389714023709074 0.9287180956351953  
0.2652595497763434 0.8676718076641002 0.4420930510496350  
0.4007941876620099 0.4666136016023364 0.3184577877720067  
0.4993425426167831 0.3255462433682590 0.8202255364840864  
0.9014645097668285 0.8236593646546204 0.3752635085596783  
0.9946975886764824 0.9765337749533129 0.8770330301272846  
0.9945906651277580 0.3246984543988589 0.8805249630510921  
0.8999408912017417 0.4750898005562808 0.3760573903886585  
0.4912794702208857 0.9588442170323610 0.8201581929347370  
0.3952127341766383 0.8274279651884542 0.3284206701408559  
0.6261170071750557 0.2279450798927274 0.2886452972744081  
0.1176107674300211 0.0727477265235302 0.4074454753271567  
0.7753740016209764 0.7287378435776038 0.9122630939933625  
0.7738263517847510 0.5739116135019233 0.9141478808427053  
0.1244224359523273 0.2266472903260919 0.4122351434404011  
0.2722548220458209 0.7303966967954728 0.7869835631845520  
0.6200685357288266 0.0707666429845210 0.2945692855072251  
0.5186949829167764 0.2752705174880433 0.4465405350636524  
0.3823054876795116 0.5232112310439017 0.9454113847683988  
0.0171496796609790 0.0210619058748433 0.2560026166956449  
0.8729222576615744 0.7791414681943514 0.7582662395659487  
0.8719555816638953 0.5225864275686644 0.7605570984374389  
0.0250931725773378 0.2785445399144017 0.2610775005854852  
0.3669791623334112 0.7764270104096804 0.9483662215310398  
0.5168681649769153 0.0229654819980108 0.4437016867254420  
0.4839962372116584 0.2214102040327326 0.6556779021777508  
0.4109560923851837 0.5696434054533904 0.1548392147087332  
0.9742372970812706 0.0724399737327029 0.0554405273595545  
0.9150447884495465 0.7272219988657439 0.5547788931564941  
0.9147271066290539 0.5729678245214462 0.5546273748738803  
0.9755181234491092 0.2279071740199420 0.0602787656333314  
0.4087674720805914 0.7277214874399254 0.1543692707024938  
0.4695431074163381 0.0658873301067349 0.6500703000076364  
0.3256367553251745 0.2371914212519256 0.6336142711720617  
0.5693651713787066 0.5700406496605401 0.1358249443646441  
0.8175915551459846 0.0731247900778156 0.0672029163394368  
0.0730646956841278 0.7289575885614840 0.5652813457062613  
0.0741078914494829 0.5725353239372769 0.5643805049928886  
0.8189040666539028 0.2294954566668020 0.0682534113478346  
0.5674412013356492 0.7289633293542973 0.1331887951589998  
0.3140404943731240 0.0809102699573924 0.6353622308210419  
0.2684301426596850 0.2755543661043160 0.4207984529580718  
0.6276637744717575 0.5239778201141173 0.9258781222353806  
0.7684483053993753 0.0204016522068462 0.2743033741324432  
0.1232155858887539 0.7794305963226170 0.7742142184040191  
0.1207507053671401 0.5229924778717725 0.7747958539042639  
0.7717020850921145 0.2780011677381646 0.2754701221778210  
0.6271172296039412 0.7797475125941563 0.9243048968728799  
0.2648366210292798 0.0264651511216276 0.4286618187438296  
0.3998601226952305 0.2306297197105376 0.3085167934181791  
0.4971586893214664 0.5703882247396211 0.8184606703442990  
0.8973828055640410 0.0723738516703957 0.3877212008037093  
0.9933602424116486 0.7289286607241400 0.8904538824381250  
0.9917899499467500 0.5749523452290155 0.8908059963847911  
0.9030578445923186 0.2267692570595547 0.3894525258781214  
0.3964346515053099 0.0745510301333652 0.3140775487777705

Structure 9 S=10/2

1.0000000000000000  
20.1473052208877697 0.0000000000000000 0.0000000000000000  
0.0000000000000000 19.7681594983396742 0.0000000000000000  
0.0000000000000000 0.0000000000000000 13.2309279702280254  
Al C Fe H O Si  
2 1 2 10 198 94  
Direct  
0.2731410235674011 0.5717299292657873 0.7921180454066172  
0.4912659665371631 0.7327208841586480 0.8087267444384687  
0.5230950978817174 0.6757429915274803 0.4457037311760351  
0.3222349609597904 0.6222622615733784 0.5978526783689989  
0.5178800970437297 0.6694254582068072 0.6015373409511715  
0.5690608029200427 0.55463347357208489 0.5766408619342986  
0.1996162134290097 0.6733393897652691 0.5786526896736118  
0.2385274551392426 0.6646465156498501 0.4755420627503756  
0.6074406831712424 0.7317544258049696 0.7226019090119706  
0.6325452065884248 0.6700336973104103 0.6562249118491548  
0.2406475161280695 0.5659134288250276 0.3802125543090800  
0.5342535278557869 0.6249953116487801 0.4162367317035211  
0.5657923314193875 0.7089569989223310 0.4315612547399926  
0.4193886071974600 0.6384992941865322 0.5047588221597185  
0.4793028706306123 0.6968703534828585 0.4077977465954104  
0.7033582391004223 0.4715870551062666 0.3145078572218742  
0.1927389483148515 0.3332273488106470 0.8140178162230007  
0.2041389358586914 0.8243722189393923 0.3961363053681027  
0.6918973523540425 0.9802167163628834 0.8888261843677625  
0.6934249783732443 0.3245800209167131 0.8878686249476951  
0.2048965976167661 0.4825177069697386 0.3918520946145611  
0.1974319212017696 0.9725563398532932 0.8071267101607744  
0.7051781951265899 0.8239826308203729 0.3046740404491745  
0.5889264690513747 0.4665155019018890 0.4129345940637035

0.3061531688732639 0.3412205799649296 0.9100037635364611  
0.0947272253176555 0.8356443562093395 0.2876537784382843  
0.8060597799086705 0.9708090028130314 0.7877700353984982  
0.8056995226292648 0.3330485711711486 0.7887219331840616  
0.0934855604165243 0.4679672396804929 0.2892406612872359  
0.3114537729733632 0.9837388236006369 0.9077789536188505  
0.5934342447051931 0.8432944533667245 0.4001761374002330  
0.6009539856969586 0.5391476509667714 0.2444695845599824  
0.2988219711698782 0.2760132453717192 0.7342113639638802  
0.0947488085928610 0.7596367686008134 0.4533956928082583  
0.7980484272689062 0.0435204161466077 0.9552592595062065  
0.8008564534752524 0.2604074167299811 0.9572069546454425  
0.0959656111229525 0.5452281266445376 0.4540424000184868  
0.2923068565429784 0.0545705167870917 0.7433258739119619  
0.5958527620191502 0.7625054924401058 0.2400618139431289  
0.6008600716530992 0.4032222233521865 0.2394683351268215  
0.2884107236309595 0.4115346191124148 0.7424186327495677  
0.1023654312538640 0.8938203709322755 0.4676697726414729  
0.7931569171025141 0.9086694800579239 0.9620551190740741  
0.7936003951036117 0.3947462789727447 0.9659737922188659  
0.1051474566206661 0.4109227151744590 0.4707738508804641  
0.3096204350181316 0.9214591750982420 0.7305561289658692  
0.6110042191084005 0.8959630906835001 0.2165674761327216  
0.5207740555324910 0.4517377579729696 0.5794418634793149  
0.3798251199827453 0.3555505864918537 0.0721788337081515  
0.0215062898957595 0.8601293831105710 0.1267153691201341  
0.8731778666514580 0.9381751136950706 0.6247295611952064  
0.8759393065284382 0.3631407811852241 0.6265876725340600  
0.0221859992008221 0.4397340477081461 0.1270957736829649  
0.3697163398012590 0.9474290120044317 0.0777094266295718  
0.5205827693483813 0.8640859739292185 0.5619660799878623  
0.5128507709698994 0.3557599201747142 0.4361002077491632  
0.3944697583055389 0.4425130509599035 0.9188828873048333  
0.0127155123462168 0.9416801884105384 0.2876063971300264  
0.8794453601354966 0.8583101665790493 0.7878786237241207  
0.8810184882449281 0.4433673824579972 0.7900977289679904  
0.0184308383681101 0.3575815465401035 0.2887240308734962  
0.3464793536584346 0.8578364902837751 0.9303512319011208  
0.5116849823642519 0.9488585131009935 0.4039102501081424  
0.4571562241160051 0.4754238815673307 0.4096657648725578  
0.4347715487108748 0.3170043157086535 0.8977660870430196  
0.9649334590101357 0.8185159737520383 0.2987403784451810  
0.9389077409116147 0.9761153170308988 0.7893840044165962  
0.9368402225174594 0.3231991631828992 0.7936690081744763  
0.9627571465173685 0.4780833224428834 0.2971076217188408  
0.4416261914502898 0.9515089828868987 0.9140333516959586  
0.4634798211101308 0.8256784596435971 0.3906047609774833  
0.4675102278076004 0.5174581453005782 0.7365779813552760  
0.4263452198811185 0.2763097304107046 0.2153977816227917  
0.9799121375510943 0.7786510677080513 0.9837221290986534  
0.9110466728120794 0.0214706198047809 0.4810659269568518  
0.9115627543113514 0.2758958672417567 0.4864943271747084  
0.9840737760110864 0.5235955105872347 0.9841165959924217  
0.4122265369586234 0.0270697348684177 0.2210003323869371  
0.4804394559145044 0.7635711895021993 0.6824488629344954  
0.3936256590343944 0.4370262027854321 0.6246988373447779  
0.5086419476791788 0.3555105964612690 0.1148976548383427  
0.8952978488188051 0.8648420513957088 0.0714350893930898  
0.9989832227292315 0.9394074938611107 0.5696711584302410  
0.0014128163555101 0.3598221728656925 0.56669966699421840  
0.8958619079499369 0.4408494688734580 0.0725542490335569  
0.4955027579209240 0.9369675086361076 0.1409737709322513  
0.3936849663816663 0.8566637026601939 0.6124935863253251  
0.4873296497172738 0.3845134260593711 0.7422949154070827  
0.4243241675786028 0.4096703098083780 0.2432985353664904  
0.9893347562549341 0.9098052724648816 0.9475212323204785  
0.9066260737323741 0.8895828564778846 0.4457839862156238  
0.9070568876021287 0.4068265200556230 0.4447919102288995  
0.9881248484930696 0.3915606198818085 0.9487052684642675  
0.3944594550393847 0.8954846824671480 0.2547801484842001  
0.4840967455441499 0.8879000415926184 0.7507555305069860  
0.3066452654831884 0.5348998464865327 0.6766836039880221  
0.6006097065411214 0.2734970898343028 0.1925093820208907  
0.8094654172518161 0.7769307708053262 0.9956165486531999  
0.0884542195870796 0.0254127496095529 0.4969242870282175  
0.0949019168211963 0.2773191470035955 0.4960517226160727  
0.8066641340846916 0.5265352002239582 0.0001650744418114  
0.5830929168927912 0.0270279203047875 0.2077027297047634  
0.3043143457868318 0.7864439576180422 0.7147182205053452  
0.2713954754112504 0.4367823510973062 0.5496205698172894  
0.6334712691991373 0.3642135061493455 0.0550869363576460  
0.7716640546989901 0.8599096004811337 0.1417632348239363  
0.1210496410078695 0.9448504076895593 0.6481547318129393  
0.1217937150617767 0.3567292411448149 0.6497318691713412  
0.7727480159926162 0.4429720317246847 0.1477976741289447  
0.6090613702835035 0.95830635656802525 0.0418820207243027  
0.2654057488864059 0.864149885888487 0.5641505485910998  
0.3311163743478072 0.4453959982938958 0.3707633036451957  
0.5639289062373269 0.3381501548194468 0.8900540666342273  
0.8347694620566850 0.8238892167003123 0.3081787641974078  
0.0685765846094263 0.9766241844437614 0.8244157207596875  
0.0653638794960252 0.3212722306014172 0.8236772317870661

0.8325196823589810 0.4769905497995195 0.3171735123324723  
0.5661384811130697 0.9653786653495569 0.8536893669643656  
0.3330034453592487 0.8311321208680170 0.4015051963629277  
0.2396034857693725 0.3535526900794256 0.3990185262994676  
0.6409206005279211 0.4474534135862596 0.8985521153883792  
0.7716486603924440 0.9408931887486158 0.3029744782166690  
0.1303230557787054 0.8582383732405942 0.8024083906880992  
0.1168291623573220 0.4436437917025761 0.8033440124425878  
0.7719464018872343 0.3580315183543484 0.3054642601305546  
0.6400140549400716 0.8594731755556398 0.9117408101964735  
0.2617403044559951 0.9455280698966172 0.4044168883124370  
0.3916307091311986 0.5399541067885500 0.2682926321396057  
0.5078768402035740 0.2535047737539062 0.7639122055077985  
0.9003945377925172 0.7545545823151617 0.4412642501725883  
0.9880731061962857 0.0452528787525298 0.9402239280496401  
0.9869809980349796 0.2562733459516612 0.9464017091707746  
0.9053865656366653 0.5425817840355218 0.4458125251927200  
0.4694184499142467 0.0232151874434431 0.7532832078571640  
0.3907552347191702 0.7587315772602488 0.2625350057903642  
0.7035339984465013 0.2432804458959095 0.3133640651011424  
0.1901925530900012 0.5566726922273781 0.8061972046496280  
0.1967920165647508 0.0616360218097194 0.3896480727977117  
0.6942755301117931 0.7379906385286320 0.9108407570781795  
0.6928986139979646 0.5694140911805702 0.9153660751042219  
0.2059602107143589 0.2267348655086108 0.4107864976194332  
0.1912796089033675 0.7385804141803518 0.7948588466991500  
0.6975499757140968 0.0511362120048924 0.3059967855633393  
0.5829234098696509 0.2475310400034771 0.3886389792998524  
0.3187199558841547 0.5519090014806320 0.8957984083947114  
0.0836847378735182 0.0546331266167763 0.2990981831298428  
0.8024502768277659 0.7492335980183309 0.7992432844159754  
0.7996584972719443 0.5499680429672932 0.8021806177540505  
0.0966624417890140 0.2492332937598155 0.3003630739802569  
0.3024679169049543 0.7349405444111931 0.9010959770614312  
0.5855287139665140 0.0605490221873501 0.4033944976191369  
0.6145472254291224 0.1503473366144391 0.2592098756563354  
0.2881421851085568 0.6549866443912522 0.7410434788022392  
0.1015744836318248 0.1502427475110369 0.4381098059456081  
0.7940809980824644 0.6516261957902720 0.9367153526509069  
0.5261486989861384 0.2537166381184354 0.5660830107721304  
0.3747245041824563 0.5256146876382845 0.0726066396462258  
0.0171325660174157 0.0261451385971669 0.1327482703182621  
0.8744129672449638 0.7724942340646914 0.6352788618761992  
0.8754359990744756 0.5289728576605597 0.6391152693789597  
0.020958757725067 0.2700262474942390 0.1384345091710680  
0.3673697187445532 0.7659044762882691 0.0686989447485781  
0.5138570470033850 0.0277327049749853 0.5653959384448421  
0.4499015661009851 0.2401246641662785 0.4050661682060767  
0.4500728652522213 0.5637274820731901 0.9206129261837922  
0.9524015267778277 0.0605720817751821 0.2992755689943943  
0.9345174101065222 0.7371070454407623 0.8050205140267767  
0.9295799696224386 0.5670538876138865 0.8125464766129059  
0.9652205845122224 0.2361977950736697 0.3126892875308123  
0.4336986528435379 0.7591105596240484 0.8950033005876211  
0.4544888640061852 0.06999618357588621 0.3997061383010429  
0.4972563305427731 0.1407741463402124 0.6669476367447749  
0.3874687218284713 0.6475769418473755 0.1541090796114857  
0.9980738009491397 0.1495638694427804 0.0627701019799252  
0.8902693122369899 0.6497280346987898 0.5616186101392729  
0.4053706890310170 0.2365506173896605 0.6372305353677901  
0.4915835343122675 0.5644264495996257 0.1440378397779097  
0.8965692807032417 0.0649246924226024 0.0828761650054694  
0.9939620162474365 0.7316693858516486 0.5780267394282294  
0.9962457551848487 0.5707182254347518 0.5833217989932928  
0.8974959406581705 0.2358822741876693 0.0903860875730001  
0.4886066624592796 0.7328868979975927 0.1327473497243737  
0.3917754723334441 0.0701871378993247 0.6096567249438393  
0.2953455908432591 0.1615826069454182 0.6271263720412567  
0.5932667532324837 0.6498128194060071 0.1322850795504567  
0.7951513072146867 0.1511723565399174 0.0728475048081917  
0.1016602563941158 0.6525630054971658 0.5722419976803701  
0.2998958157083911 0.2787376400586892 0.5347428238496388  
0.6001781732012561 0.5286392738667809 0.0449562451876296  
0.7797041460095466 0.0291959375603001 0.1530993927932231  
0.1080055646581986 0.7751329867921144 0.6508819968965319  
0.1129111046081816 0.5290633376779733 0.6501309148684707  
0.7787497753456523 0.2721987521122900 0.1536193727681494  
0.5988547338765338 0.7691554871616654 0.0413198104708057  
0.2722482331811746 0.0391223719099080 0.5480093960333027  
0.3254333991232785 0.2576660780252463 0.3410271690917026  
0.5715055916207930 0.5566626809753942 0.8509599285542678  
0.8244644764988980 0.0611594525594239 0.3385212621849050  
0.0639919240530097 0.7442704233323650 0.8360191989055603  
0.0599615315857028 0.5622541708143465 0.8273375431573565  
0.8338673366754178 0.2411342556275461 0.3308776106551032  
0.5730021036542355 0.7523100538888877 0.8431274063728404  
0.3254910071868996 0.0600127771423582 0.3656031610579958  
0.3959933453426813 0.1539993274525152 0.2737395000337781  
0.4869147872059658 0.6474556908020701 0.7747389629933121  
0.9026430368079810 0.1489957416822414 0.4298806195420888  
0.9926279304107917 0.6518928577307250 0.9322582265742839  
0.5695956812233636 0.5922524758914720 0.6241890163330343

0.4132538220633225 0.6425769394292481 0.5779629592056955  
0.2429010340908949 0.6820058892907855 0.5467886661960606  
0.6108108002692111 0.7144135348419565 0.6521674517199632  
0.2665108396499309 0.6080854492237091 0.3930441763210363  
0.3145062981290772 0.5841264579786944 0.4655194187290598  
0.6234638154875153 0.4702448613160895 0.3013355759980529  
0.2719080538624117 0.3400001125369148 0.7989879485222469  
0.1240069169989723 0.8285402587495690 0.4017993289911659  
0.7717210693034809 0.9755265803186612 0.8990905052477208  
0.7733500007399500 0.32812142020710311 0.9011644359823687  
0.1236001889783685 0.4758746360434729 0.4024163596567454  
0.2769065189727912 0.9822750915476163 0.7968503558355607  
0.6257133511205374 0.8313037521419959 0.2889038015013741  
0.5201062679897398 0.4359270683380072 0.4588652387994014  
0.3788928369563375 0.3648414744596893 0.9503631663768978  
0.0232458284998414 0.8641778567750010 0.2487244257848256  
0.8742399054054618 0.9359690770208615 0.7470961419281410  
0.8748572517078033 0.3658968090946302 0.7488355723559772  
0.0237655157981912 0.4353966831724157 0.2490402674861303  
0.3678506318051231 0.9346791075528756 0.9570820045138275  
0.5222172276646742 0.8706234397204600 0.4401473911006928  
0.4678024285513890 0.4483840963280306 0.6727523391072410  
0.4341864878335218 0.3495419872471671 0.1619187995437526  
0.9710709986536016 0.8534502753103285 0.0314918159960189  
0.9228625723486789 0.9471435233766957 0.5291854389062355  
0.9245236974570908 0.3512446054659083 0.5304992052966273  
0.9719368941305525 0.4491440057035344 0.0318791647505079  
0.4189539977525230 0.9516988718592563 0.1740240638428220  
0.4695608559240271 0.8422121202977139 0.6512589067120016  
0.3162904564871599 0.4544107774113306 0.6472876516126458  
0.5856879090569868 0.3491486255558594 0.1505179219283616  
0.8176003056522785 0.8524347538936728 0.0421650871688993  
0.0773641942820809 0.9510775664586889 0.5460440737517779  
0.0804041291898849 0.3508814838090863 0.5455122357032421  
0.8174024805669445 0.4512508409282529 0.0465148720097501  
0.5741164965044327 0.9544151926652711 0.1515979092635166  
0.3182228219157370 0.8570664493496104 0.6562693507428775  
0.2633065598677203 0.4294914002776049 0.4285346240671657  
0.6322802681826346 0.3690588433675805 0.9324310456885304  
0.7707401104166879 0.8628954554771364 0.2642361871446972  
0.1291684844847301 0.9376714821470246 0.7697311073163204  
0.1239668550265239 0.3648151595593215 0.7719754716249687  
0.7700987221009933 0.4367271502149700 0.2701787040229519  
0.6260208386579668 0.9396023165489831 0.9253185905496415  
0.2662986550214438 0.8672357427191065 0.4412797518493972  
0.4011671242999766 0.4674143116452039 0.3224589579665023  
0.4985068888720132 0.3243778358178528 0.8235791225602070  
0.9017252181927080 0.8231169110489724 0.3744359596238156  
0.9959965113730463 0.9759434927460173 0.8759562551763000  
0.9942646750538199 0.3242638815590026 0.8793859493031946  
0.9019463759474547 0.4749685158442643 0.3773041246539416  
0.4902560953754347 0.9565779891394022 0.8170031515095254  
0.3955201170733578 0.8286910941403328 0.3254214551120136  
0.6256555004079543 0.2290631194650105 0.2885491917673187  
0.1180567299133470 0.0725237052840592 0.4069310130226184  
0.7738941891028853 0.7293380593792447 0.9111375560018605  
0.7729250671194285 0.5739173850924082 0.9135909339957926  
0.1251445044773026 0.2265894623694219 0.4110917974528044  
0.2714089117789330 0.7301752225839535 0.7883591376004999  
0.6205097781197559 0.0718906584681442 0.2934177532952181  
0.5179156169400505 0.2741868625519102 0.4481545273370962  
0.3828689305455930 0.5218605928932757 0.9499477321398092  
0.0165145250291704 0.0208018922964291 0.2551703029474202  
0.8724710098264241 0.7790599321034571 0.7576784099007806  
0.8710211320336371 0.5225677387494563 0.7613782001575555  
0.0254756125956243 0.2778713851817337 0.2603045683110308  
0.3649851963587746 0.7784318860766004 0.9473567818147725  
0.5167648013218256 0.0268027899406839 0.4428472384941682  
0.4833243876864135 0.2210379620131316 0.6580937140208575  
0.4120452701022414 0.5699967431767983 0.1584710054282356  
0.9743949790557805 0.0717319290514871 0.0538024643694296  
0.9149482272221893 0.7272772630880840 0.5538036935520952  
0.9172420558460764 0.5728286173115839 0.5574047129869204  
0.9751811460242961 0.2278256323263688 0.0592318844557727  
0.4095965688295947 0.7261138403575010 0.1537773832644025  
0.4679522438826464 0.0655981424229845 0.6492539385880255  
0.3252115535411761 0.2377388748127444 0.6339170393572421  
0.5712663899776175 0.5710211941281600 0.1405962229606287  
0.8173730670364230 0.0724523875530074 0.0658688150660717  
0.0732082245833928 0.7303175592465906 0.5630925899247694  
0.0755216840983944 0.5738143511180540 0.5654565803110769  
0.8184198810593371 0.2296228941262565 0.0677276279678584  
0.5687143349513117 0.7281310220218739 0.1364631185627391  
0.3134181709740380 0.0815640144932810 0.6323585154603920  
0.2684528004842361 0.2779091923668133 0.4216509646104448  
0.6254004598646360 0.5257426415634195 0.9279724669051761  
0.7687716146208482 0.0205974105059928 0.2744903298694977  
0.1230665378919427 0.7791850171036535 0.7721356822236802  
0.1215541041627932 0.5234173776556512 0.7737675994595293  
0.7721054016327749 0.2784043677617635 0.2760752311702219  
0.6249351700858613 0.7792170288208704 0.9260415463862514  
0.2647841124288959 0.0262244067346016 0.4270403507585364

0.3993267289289599 0.2322048242788302 0.3096765293260466  
0.4952728723190078 0.5720771230212314 0.8185332529864345  
0.8974172514513045 0.0722019579765330 0.3873330015155648  
0.9929094931495764 0.728669570961441 0.8890536602650687  
0.9920687314264485 0.5749333588904829 0.8893231512316999  
0.9029959231285574 0.2264764962147224 0.3896209143100888  
0.3966799366282779 0.0767984905573506 0.3148976743054399

Structure TS reaction CH4/5→9 S=10/2

1.0000000000000000  
20.1473052208878016 0.0000000000000000 0.0000000000000000  
0.0000000000000000 19.7681594983396991 0.0000000000000000  
0.0000000000000000 0.0000000000000000 13.2309279702280005

Al C Fe H O Si

2 1 2 10 198 94

Selective dynamics

Direct

0.2738919579851498 0.5726140315302359 0.7860489231206600 F F F  
0.4920157828116345 0.7330417217888083 0.8090395682304532 F F F  
0.5014363388870464 0.6670180142894182 0.4395097988612804 T T T  
0.3260415601365025 0.6233121427695849 0.5889783109565343 T T T  
0.5121678095514994 0.6638356632361564 0.6104473257238752 T T T  
0.5598530577614440 0.5461678849969616 0.5876339910461539 T T T  
0.2037799187641767 0.6750159396893380 0.5780607700026295 T T T  
0.2390559632751703 0.6636222020153824 0.4721910807901395 T T T  
0.6051398072390342 0.7342703687572154 0.7120374409415149 T T T  
0.6331683740133158 0.6757496995016297 0.6420577532973368 T T T  
0.2392451035939231 0.5651059201469479 0.3808900380622688 T T T  
0.5208399067881970 0.6184769352345754 0.4127819164871411 T T T  
0.5424057257932731 0.7039241386775501 0.4450364979514632 T T T  
0.4451975694259573 0.6534375645829442 0.5080369591497274 T T T  
0.4650603105579449 0.6879303284350939 0.3861969549945883 T T T  
0.7028212322290699 0.4720609129441016 0.3127470922513922 F F F  
0.1932139438133262 0.3334605734437659 0.8131179178243002 F F F  
0.2038462204116342 0.8247095138575986 0.3959693917088671 F F F  
0.6920356589334489 0.9803323202891576 0.8900944660770378 F F F  
0.6938276149267679 0.3236890967275983 0.8874077127541256 F F F  
0.2047792205065875 0.4812639412244408 0.3907191604551770 F F F  
0.1969856301405954 0.9728892483966760 0.8073146945715521 F F F  
0.7049029766263573 0.8236913725384980 0.3050688536759836 F F F  
0.5885692099018769 0.4666216601202109 0.4110125834691303 F F F  
0.3065511406983461 0.3428015041635604 0.9087252250814331 F F F  
0.0943257516610032 0.8355485205959496 0.2881395137224345 F F F  
0.8056517569995236 0.9706567682606604 0.7879166449524675 F F F  
0.8061202616588119 0.3328165371170400 0.7884671391738891 F F F  
0.0930340539179895 0.4677111251053532 0.2890639361865652 F F F  
0.3107789905780862 0.9823639350281397 0.9085983284049135 F F F  
0.5928016347549132 0.83983359705914729 0.4009997099925897 F F F  
0.6000892026474673 0.5392316009358709 0.2425067946221020 F F F  
0.2997699207190792 0.2769887287220669 0.7335674715282892 F F F  
0.0946271302746240 0.7595295578743801 0.4538193149047629 F F F  
0.7985611691222729 0.0435596150615254 0.9553319335342820 F F F  
0.8016278430350994 0.2603508914806341 0.9571005621708366 F F F  
0.0964142018497185 0.5447149721294693 0.4538003137216506 F F F  
0.2924407631152235 0.0547007889836095 0.7445134611641038 F F F  
0.5967604885054385 0.7612445675900688 0.2382734772266275 F F F  
0.6003974388334470 0.4033130375378420 0.2379631178136066 F F F  
0.2883287257104428 0.4125831718894446 0.7407616877538246 F F F  
0.1021071169502221 0.8937481449088480 0.4680639722906363 F F F  
0.7935093789951395 0.9087407302563264 0.9626523263316713 F F F  
0.7934437489504020 0.3947264803705366 0.9652840271948762 F F F  
0.1049775436033826 0.4103187948402720 0.4702150168948975 F F F  
0.3092367909960316 0.9220555433879554 0.7301710652672782 F F F  
0.6095203237063060 0.8952192948500368 0.2190052042570159 F F F  
0.5209997088958573 0.4539904822241283 0.5779938579650619 F F F  
0.3802798098072984 0.3559869037157029 0.0707503522832482 F F F  
0.0217375501240653 0.8604139564086921 0.1267008837348840 F F F  
0.8728040837721807 0.9384024856259572 0.6246863310434634 F F F  
0.8758648090267940 0.3630369546343459 0.6263098341963769 F F F  
0.0218898833903012 0.4398589417287440 0.1269420382763045 F F F  
0.3693816784015738 0.9448289420007967 0.0777307440031478 F F F  
0.5207615014242322 0.8630873717733962 0.5630878746651931 F F F  
0.5127526853362170 0.3561464919226438 0.4373771266952033 F F F  
0.3957681989130748 0.4434490161274169 0.9177613967163651 F F F  
0.0125878232858980 0.9418121954687138 0.2877472556753133 F F F  
0.8790570456005398 0.8583543873207304 0.7877558442454955 F F F  
0.8813649418910003 0.4432592875897328 0.7897269390119988 F F F  
0.0174957670754949 0.3576904146219704 0.2886572028054033 F F F  
0.3490560958592539 0.8566961582912782 0.92711163675687433 F F F  
0.5130105157503380 0.9472689172756645 0.4043178647032661 F F F  
0.4565325028423501 0.4753937128224308 0.4083597853047536 F F F  
0.4350022523198902 0.3178962644134273 0.8958085962162627 F F F  
0.9644107915655908 0.8188525648236933 0.2981546434298892 F F F  
0.9384631238906138 0.9762465465823098 0.7895187878669887 F F F  
0.9373256633204647 0.3231691952826097 0.7931641866424854 F F F  
0.9622539675050206 0.4783316407275109 0.2968299790708286 F F F  
0.4415028201258124 0.9528525826056935 0.9144074082852427 F F F  
0.4629878602802080 0.8244225007449586 0.3924627019095155 F F F  
0.4691992539777701 0.5180338188872966 0.7342205559380801 F F F  
0.4256743847402618 0.2759737906190125 0.2142420119254780 F F F  
0.9802332670259659 0.7787789794511824 0.9837998835496222 F F F  
0.9112106136996587 0.0216215286151566 0.4811959657668510 F F F

0.9117528918658522 0.2759672226261713 0.4861889868448017 F F F  
0.9836176214618106 0.5237361982404352 0.9839091446773409 F F F  
0.4108592888346934 0.0266833982695900 0.2194791153905200 F F F  
0.4784596087551449 0.763845955539256 0.6839515211981677 F F F  
0.3940256221191660 0.4364572225375980 0.624322267009187 F F F  
0.5088899087567711 0.3541813465594927 0.1134748549248954 F F F  
0.8954464014520127 0.8645317785733226 0.0721056169066472 F F F  
0.9987039054458435 0.9392414561240372 0.5701221291839360 F F F  
0.0013179936752792 0.3598330611070466 0.5667567360800660 F F F  
0.8957407442407046 0.4404970031680975 0.0723426141325021 F F F  
0.4953239984737010 0.9372218876679526 0.1403084125762888 F F F  
0.3935239610564238 0.8580784489399136 0.6121114135976526 F F F  
0.4890373101609597 0.3847510298185242 0.7405261141767028 F F F  
0.4254691350707063 0.4093548745829239 0.2420581327271449 F F F  
0.9888850368994042 0.9100122723813513 0.9476216408572000 F F F  
0.9064031001431587 0.8897731450430086 0.4457837967073743 F F F  
0.9069815444439939 0.4070205303973751 0.4448056526325956 F F F  
0.9880794581613728 0.3917768269866073 0.9483053982824146 F F F  
0.3955355152493709 0.8954553891950425 0.2562773561098766 F F F  
0.4838174139084401 0.8880242600030286 0.7517125569530023 F F F  
0.3072233210683422 0.5355514779844981 0.6712339643946024 F F F  
0.6012963473028279 0.2732787402230912 0.1920744834397894 F F F  
0.8097608518864519 0.7769253746357592 0.9954626438139726 F F F  
0.0876831316468270 0.0253912282576110 0.4965435116758101 F F F  
0.0950586526759238 0.2769915926747970 0.4971064246024355 F F F  
0.8065359441993394 0.5263319989155164 0.0007975744503170 F F F  
0.5836086017978914 0.0265818670163540 0.2070805874131452 F F F  
0.3050370118945196 0.7872492950995991 0.7150417183280240 F F F  
0.2722548815606629 0.4355168177644160 0.5474322566673564 F F F  
0.6337708388169787 0.3638224209383907 0.0543151247237716 F F F  
0.7715754890489706 0.8592544394114157 0.1419603333798278 F F F  
0.1208251664100217 0.9454434092859145 0.6481876912907722 F F F  
0.1214914900092978 0.3571745245302225 0.6500062722095663 F F F  
0.7725246445449017 0.4420643509215694 0.1473386119116640 F F F  
0.6097864492853446 0.9561113551309788 0.0430638262065841 F F F  
0.2649146533242543 0.8644274262687262 0.5643378154095089 F F F  
0.3309690099934670 0.4436000195490948 0.3679108313124004 F F F  
0.5643704135725827 0.3379943399274694 0.8891084416074619 F F F  
0.8342948701011252 0.8237704002350981 0.3090564504985736 F F F  
0.0681452642017391 0.9769545431374524 0.8244217032397216 F F F  
0.0658333154406421 0.3212432328283725 0.8243710479458741 F F F  
0.8320044377063880 0.4762672462600293 0.3167380032682061 F F F  
0.5662914517375128 0.9648248816817571 0.8550411399652944 F F F  
0.3326347955723108 0.8314043567254359 0.4019161865539402 F F F  
0.2394106543381085 0.3523389286558114 0.3978182777116359 F F F  
0.6419344502914512 0.4468238317572570 0.8976146267569689 F F F  
0.7709889357680311 0.9407726527969658 0.3025318336080929 F F F  
0.1296678683330157 0.8585475746411930 0.8021419876619547 F F F  
0.1170064967569218 0.4437717573575100 0.8042332772086311 F F F  
0.7703785172166278 0.3577481764812802 0.3056928365958314 F F F  
0.6411157664729501 0.8590635250788239 0.9104213549975739 F F F  
0.2616412698627784 0.9458092611783542 0.4046805434338481 F F F  
0.3908151823612087 0.5388897046683354 0.2653870756179018 F F F  
0.5080873891477751 0.2534466835247926 0.7630363050683329 F F F  
0.9008841455757093 0.7546867307179923 0.4414172603233979 F F F  
0.9876073843558899 0.0454205306181379 0.9402920263385965 F F F  
0.9868389408162273 0.2565011852301708 0.9466248751237174 F F F  
0.9039764582207113 0.5428250179409915 0.4450239798306939 F F F  
0.4706381737551411 0.0234827953124608 0.7534492338255490 F F F  
0.3901606602959546 0.7589106965887424 0.2627388354515787 F F F  
0.7039266912671351 0.2418711437908598 0.3127138659812374 F F F  
0.1912046887472343 0.5564258378533111 0.8027762152522868 F F F  
0.1966333571618790 0.0619506196619923 0.3909291929930774 F F F  
0.6947118196618192 0.7373273313734785 0.9106716884872412 F F F  
0.6934061736162533 0.5691505829571000 0.9144505975716584 F F F  
0.2058015635255757 0.2257973383577223 0.4111044395266390 F F F  
0.1921572050358762 0.7397060015037695 0.7957410661656255 F F F  
0.6976467611682153 0.0515937222152445 0.3059567460426393 F F F  
0.5834225577955507 0.2484403004430931 0.3881849011290015 F F F  
0.3196311861973058 0.5522611608100760 0.8898594462057901 F F F  
0.0840576629713610 0.0544462337037146 0.2986998445993265 F F F  
0.8029132381396025 0.7486597529239134 0.7992064219933610 F F F  
0.8007579107464480 0.5501535247877030 0.8026602718868077 F F F  
0.0967327594860450 0.2499863845005450 0.3009789408585632 F F F  
0.3038068872927226 0.7338846772176808 0.8996855511700019 F F F  
0.5853467773038119 0.0597067209928355 0.403050035517681 F F F  
0.6136701910413933 0.1500919644103291 0.2596223116602019 F F F  
0.2879033514230684 0.6557925886677438 0.7372897669085390 F F F  
0.1008007517487925 0.1502198848333620 0.4377658580901169 F F F  
0.7945378066895330 0.6514033767957486 0.937509744977670 F F F  
0.5265634124858849 0.2535099151305644 0.5654366669636701 F F F  
0.3731782360799158 0.5274402019449056 0.0693714006509865 F F F  
0.0170513522938762 0.0261409800795462 0.1327236664501399 F F F  
0.874445329619001 0.7724865293984067 0.6352316237986386 F F F  
0.8752673448682984 0.5289362178344277 0.6385928910409149 F F F  
0.0211724890892384 0.2701018606820753 0.1385915381037961 F F F  
0.3666508113588165 0.7662293611538615 0.0688763447912635 F F F  
0.5136330427495395 0.0269273417976095 0.5650108892819716 F F F  
0.4503992165094459 0.2405090320101380 0.4039743048746018 F F F  
0.4502975548512040 0.5649423041559842 0.9189935194749879 F F F  
0.9527570674047965 0.0609354950384713 0.2995611451282727 F F F  
0.9351245631602012 0.7376388303091375 0.8048501212021932 F F F

0.9310291600071636 0.5666370053212191 0.8108711783045948 F F F  
0.9654736133105501 0.2357771543214540 0.3127018153133889 F F F  
0.4353832487555138 0.7558414429251314 0.8984882391012903 F F F  
0.4541843886339549 0.0676582248385955 0.3987453209774472 F F F  
0.4979363117068445 0.1405461337290106 0.6659117812872708 F F F  
0.3879147193004968 0.6479442028890503 0.1541905303515776 F F F  
0.9986179327418370 0.1496481367600566 0.0626891471791211 F F F  
0.8901593390833469 0.6498433431039814 0.5614789679062397 F F F  
0.4057522151832131 0.2361782245188593 0.6362922999991483 F F F  
0.4907103159183279 0.5631502293093220 0.1410701075641043 F F F  
0.8966246302886063 0.0656820476963347 0.0835351582050023 F F F  
0.9941562795751153 0.7316335648028698 0.5787714484797633 F F F  
0.9958658368321949 0.5703538858179513 0.5812412384542540 F F F  
0.8977190768763919 0.2354139114345131 0.0908694797688767 F F F  
0.4881346364049435 0.7343116317254044 0.1332997624718502 F F F  
0.3919586042478116 0.0700675299550184 0.6106831606721386 F F F  
0.2956098175864099 0.1615640170355732 0.6285514474620015 F F F  
0.5916129365231555 0.6494747478992124 0.1292998995242485 F F F  
0.7948407081714066 0.1513090818064455 0.0729254715398326 F F F  
0.1013411954007779 0.6520248427665152 0.5721921973114021 F F F  
0.3000581776931170 0.2780631625169434 0.5341210533890504 F F F  
0.5999064190339496 0.5282354692882976 0.0431522122444221 F F F  
0.7796894651365136 0.0292090392914730 0.1529787193768897 F F F  
0.1084764113758325 0.7745487389418457 0.6512814912613223 F F F  
0.1114284343152647 0.5281027628576638 0.6501259864434417 F F F  
0.7789895260490738 0.2725228444440404 0.1533569012885323 F F F  
0.5976789022706228 0.7686986206984869 0.0386019969785352 F F F  
0.2726455576216438 0.0392743167852529 0.5485477942066126 F F F  
0.3254297751161701 0.2563315981166809 0.3407137296072520 F F F  
0.5724806816881696 0.5555085534903270 0.8488213849071471 F F F  
0.8246898555299467 0.0606058130527884 0.3383699779581164 F F F  
0.0646534044350915 0.7440664687426306 0.8366348200170677 F F F  
0.0613740880321529 0.5626861049240475 0.8291290847447712 F F F  
0.8341575777616441 0.2416913038987474 0.3304740232735384 F F F  
0.5743494300069543 0.7526742198823086 0.8393445600104670 F F F  
0.3251144970809676 0.0604225851489488 0.3654506577352450 F F F  
0.3970801506887796 0.1534299481627528 0.2736912911699676 F F F  
0.4904027092635772 0.6471101771019718 0.7719719803731664 F F F  
0.9021783582881824 0.1490725840407023 0.4297780100820887 F F F  
0.9923440269002839 0.6519880021612394 0.9320838531974971 F F F  
0.5710091956548240 0.5925705346620873 0.6068581330506930 T T T  
0.4146246179901922 0.6438298610283297 0.5833343904584467 T T T  
0.2455081728450779 0.6832569254294967 0.5420227109843978 T T T  
0.6046717667185675 0.7159207185088974 0.6419769348960784 T T T  
0.2645660898437896 0.6079326377743328 0.3895936341895663 T T T  
0.3180150715652275 0.5862474532202100 0.4558179968800857 T T T  
0.6229683464000857 0.4704862979105187 0.2995493058452325 F F F  
0.2722839138973896 0.3410679803014744 0.7976886664240013 F F F  
0.1237396915474775 0.8284266707563148 0.4021892951784238 F F F  
0.7719215998169773 0.9755280671758513 0.8996239146486360 F F F  
0.7737555710508133 0.3277832921056003 0.9008192568179823 F F F  
0.1235800274745031 0.4752781575955964 0.4020124413818920 F F F  
0.2765088041652035 0.9822594227166022 0.7973616661149805 F F F  
0.6253650264946131 0.8299168751831800 0.2893578723550831 F F F  
0.5198257955526486 0.4365929178199721 0.4572904633808719 F F F  
0.3794029739494462 0.3658192409174177 0.9490253869965457 F F F  
0.0231082083446026 0.8643076760498261 0.2487765964500355 F F F  
0.8738995996111214 0.9360461782505567 0.7470539857801413 F F F  
0.8752203791830269 0.3657728470666157 0.7485279543664873 F F F  
0.0232442688912258 0.4354841781588874 0.2489043684228989 F F F  
0.3680347748958042 0.9337304049173554 0.9566622760130201 F F F  
0.5222925453377982 0.8690880024761967 0.4411376301092247 F F F  
0.4679927983271597 0.4482448172812212 0.6715349558316248 F F F  
0.4344176982095220 0.3491204250951370 0.1607249372496042 F F F  
0.9712047986901737 0.8535273045895764 0.0316730141135579 F F F  
0.9226993058901769 0.9472338909628704 0.5293110120861755 F F F  
0.9245235123397180 0.3513119461086802 0.5302733669844244 F F F  
0.9717932115018115 0.4492174372292510 0.0315971379562399 F F F  
0.4187001178077310 0.9510476606854112 0.1737410789522968 F F F  
0.4688272105713196 0.8425658065557400 0.6520286531764867 F F F  
0.3164315781161662 0.4549471407994048 0.6450201358553258 F F F  
0.5858479585254344 0.3486571080773757 0.1495934158990835 F F F  
0.8178192622464664 0.8522976358717358 0.0425325685309872 F F F  
0.0770302132238854 0.9511203159639408 0.5461225071698621 F F F  
0.0803198202219804 0.3507689044682323 0.5457603007507998 F F F  
0.8173234244333401 0.4508394357925170 0.0463891635407734 F F F  
0.5740187357171465 0.9536323707252308 0.1522388601250668 F F F  
0.3180111680603943 0.8576213584759884 0.6561008711240461 F F F  
0.2633492024348456 0.4283441771270091 0.4266048877370565 F F F  
0.6328484937986403 0.3684522880050594 0.9317264284447617 F F F  
0.7704341201422977 0.8626315438615606 0.2644509237623325 F F F  
0.1287494306963524 0.9379716150788511 0.7697431467617335 F F F  
0.1241358747029508 0.3650796912419949 0.7722323442808090 F F F  
0.7694760867187256 0.4363382412829537 0.2697247309947102 F F F  
0.6264806359390889 0.9389634389834214 0.9259273689762537 F F F  
0.2658790936597555 0.8674370583786839 0.4415039038934196 F F F  
0.4008423986790177 0.4669627742672660 0.3206642330991158 F F F  
0.4990489051476956 0.3244758062813133 0.8222958014934107 F F F  
0.9015983563194041 0.8232447157889311 0.3745529079143992 F F F  
0.9955969340269561 0.9761395693354800 0.8760210729795688 F F F  
0.9944921312130788 0.3243428864065052 0.8793646855871629 F F F  
0.9014132345739938 0.4749621410087599 0.3769501125318016 F F F



0.4904716827885238 0.9568430573080278 0.8176955624956435 F F F  
0.3953107570323198 0.8284643743977611 0.3264736702373625 F F F  
0.6258173289022224 0.2287582702160620 0.2882705625091191 F F F  
0.1177631377952650 0.07253726122278079 0.4069810466781050 F F F  
0.7744183670093605 0.7290356774131723 0.9112393959745830 F F F  
0.7735221497722904 0.5737574712963109 0.9137986637994402 F F F  
0.1249686031146098 0.2265207305813135 0.4115021236466774 F F F  
0.2721385336972020 0.7299316638095519 0.7869786973892303 F F F  
0.6204231787251757 0.0715934263489331 0.2932574436235811 F F F  
0.5182290001334380 0.2745084685479071 0.4477721435020428 F F F  
0.3825647152806297 0.5228414662074670 0.9471743981127148 F F F  
0.0166412710605286 0.0208799435414093 0.2551660241158586 F F F  
0.8727802700610354 0.7790623757029635 0.7576074991956858 F F F  
0.8718068915484878 0.5224841730560641 0.7608844650777371 F F F  
0.0254263826733165 0.2780337770043957 0.2604928044597514 F F F  
0.3658052068591147 0.7771633830859415 0.9470646457258027 F F F  
0.5168262213771939 0.0254450162592761 0.4424992262297565 F F F  
0.4836794025672617 0.2207479708773619 0.6572548725086804 F F F  
0.4112359990632939 0.5699716330453199 0.1566008359811306 F F F  
0.9744289879508159 0.0719621437679905 0.0539362144684077 F F F  
0.9152726430058209 0.7272716201562659 0.5539715311579201 F F F  
0.9168348242271165 0.5728322276656712 0.5565436336966911 F F F  
0.9754220835809022 0.2278458540254888 0.0594233036585408 F F F  
0.4091077849744309 0.7266187190576616 0.1538903525159512 F F F  
0.4683582053751962 0.0653845898942436 0.6490835230027514 F F F  
0.3255350191118893 0.2377480599610422 0.6337774289477807 F F F  
0.57028292900925280 0.5705605327669971 0.1384239264498532 F F F  
0.8174430220123057 0.0726762708868733 0.0660234135616307 F F F  
0.0734705267621720 0.7298586977548496 0.5635413889511725 F F F  
0.0753261526974072 0.5733961059079675 0.5648868079181639 F F F  
0.8186862727965405 0.2296106798925308 0.0678358866894797 F F F  
0.5681424905141554 0.7280932371118283 0.1346485426186632 F F F  
0.3135852980456164 0.0815229262491499 0.6333776536489779 F F F  
0.2684254393012324 0.2769188534319795 0.4211454801295531 F F F  
0.6262732079318596 0.5250265299910808 0.9269761485461530 F F F  
0.7686757372254220 0.0205577226966156 0.2743541846677218 F F F  
0.1235594556603274 0.7792377952366536 0.7724663898669633 F F F  
0.1219836938854044 0.5233915713929704 0.7734489133921727 F F F  
0.7719805066971759 0.2782087429928808 0.2758347824250436 F F F  
0.6254850341389613 0.7789029403948575 0.9242215264069742 F F F  
0.2647345632006335 0.0264547193571616 0.4275996464444844 F F F  
0.3995353842231637 0.2317929414104256 0.3090331897655361 F F F  
0.4961683117656648 0.5714973433030153 0.8182560415661655 F F F  
0.8975082017905578 0.0722235438501713 0.3873428804872603 F F F  
0.9933629701373832 0.7288052977641044 0.8890997596392651 F F F  
0.9927128133714831 0.5750042826535093 0.8891885701727631 F F F  
0.9030996613147408 0.2265235638087120 0.3894206337460560 F F F  
0.3964133335764544 0.0761005981496155 0.3142389374451895 F F F

Structure 10 S=10/2

1.0000000000000000  
20.1473052208877697 0.0000000000000000 0.0000000000000000  
0.0000000000000000 19.7681594983396742 0.0000000000000000  
0.0000000000000000 0.0000000000000000 13.2309279702280254  
Al C Fe H O Si  
2 1 2 10 198 94  
Direct  
0.2710836518573942 0.5721588997487058 0.7900088468863042  
0.4952549328399558 0.7322940432867046 0.8059479380026141  
0.5091582929180920 0.6791573861753620 0.4393284858147019  
0.3242708602333266 0.6227506172299830 0.5928627735397631  
0.4974726556097270 0.6735541494590298 0.5936070228544598  
0.5528464926391096 0.5379395975396462 0.5949135183444709  
0.2030444457993300 0.6750591293689180 0.5723068382639521  
0.2421235178764405 0.6634136743801415 0.4693835739618027  
0.6045863675657946 0.7321603126304185 0.7063110968213735  
0.6232533222817632 0.6638602659862247 0.6537680457542572  
0.2428171191845923 0.5652286451387483 0.3811971342312652  
0.5836235301412021 0.5859370922444831 0.5148802318923755  
0.5524463450090309 0.7097154094776806 0.4182862398076053  
0.4633331926283820 0.7016702691111483 0.4100602634799421  
0.5131775499080815 0.6276677783293378 0.4081641521634390  
0.7022716757013939 0.4724675253043980 0.3133337420422850  
0.1919736038732655 0.3348046473927478 0.8169939372475831  
0.2024136208796272 0.8244981532997467 0.3950934532968189  
0.6920541286910419 0.9820779269163066 0.8918947639980370  
0.6942703954445298 0.3211585485688774 0.8909504875760763  
0.2042837433240262 0.4814490998484905 0.3925439890101418  
0.1965346805193555 0.9711301276742792 0.8077297450439227  
0.7049935877086713 0.8260498295110111 0.3066027674137240  
0.5883695521670472 0.4674500940645663 0.4133198501338706  
0.3067260216970429 0.3408858185248169 0.9094089017591046  
0.0931658118081322 0.8359999523477809 0.2881720824416205  
0.8051393175353952 0.9707949766419630 0.7878781496241498  
0.8054710509280876 0.3331881004516770 0.7896997739625984  
0.0923032303023748 0.4679731442530775 0.2909876299483276  
0.3115359271142426 0.9807961849493990 0.9068302257431679  
0.5916197322127561 0.8412968365683362 0.3979431430458810  
0.5989348673181701 0.5402973766881631 0.2462523108134434  
0.2959389082646162 0.2749288681687230 0.7347871150394523  
0.0929663595694191 0.7603427657372157 0.4544215636207010  
0.7995967810244102 0.0446720286400799 0.9543738224034398

0.8037378105926019 0.2602207494747785 0.9580845114401763  
0.0955907341157062 0.5445282983208923 0.4555952356226056  
0.2913790950812221 0.0533898245990126 0.7440435894798645  
0.5992522095753454 0.7629789636716832 0.2348854105588849  
0.5992620994427751 0.4042876784390176 0.2389690208584608  
0.2883072541323146 0.4107060740027771 0.7418977898097752  
0.1013662452461599 0.8943152333238515 0.4684045802862456  
0.7936179044241942 0.9100676025635197 0.9638811336574087  
0.7930033736616676 0.3942133262652863 0.9679455520012665  
0.1047688999486906 0.4103010519635851 0.4722191929841711  
0.3084244750828732 0.9206572467882248 0.7288453782932637  
0.6111887761988988 0.8970154383136342 0.2160616498962525  
0.5206654130994200 0.4516624417556188 0.5793243672873314  
0.3791339116201547 0.3570875010108424 0.0722072709057865  
0.0216696264161570 0.8614470298997257 0.1258450404955145  
0.8717590929856345 0.9383533221767431 0.6240446752365069  
0.8753934508699786 0.3632371749644926 0.6269581676997984  
0.0228218513775468 0.4397128813163815 0.1271305364790805  
0.3698187225957011 0.9447475380162524 0.0757015103135713  
0.5190363995957497 0.8633000144632679 0.5605538813611416  
0.5148788783139093 0.3549259833248149 0.4360000023356539  
0.3940644732388490 0.4432991989860575 0.9172366818786998  
0.0112217939425380 0.9419843709672673 0.2878463899868846  
0.8782355783840425 0.8584032279522538 0.7873192122002780  
0.8805547672138518 0.4433888434551926 0.7905710595106434  
0.0175295426389526 0.3577228517477376 0.2890634305490919  
0.3520600075010757 0.8558204452369871 0.9243901461545642  
0.5128930860324138 0.9487722398362738 0.4031196817173111  
0.4563368117642401 0.4740155901885303 0.4100872188266433  
0.4358579097124666 0.3180756667367283 0.8999319391845582  
0.9633967264108072 0.8189086175823784 0.2960490602907880  
0.9380523250448665 0.9761671519943299 0.7882017040820587  
0.9366143165143003 0.3233069895338531 0.7938271942312792  
0.9609208044130679 0.4776274476217203 0.2950165412924878  
0.4432105112429829 0.9530028837308001 0.9138916244683898  
0.4615311639169911 0.8269857583855948 0.3889195585436484  
0.4735717445869112 0.5186656010558819 0.7327488418334858  
0.4251768512230729 0.2758536611132103 0.2143530475335813  
0.9810210278444006 0.7790833308346771 0.9833801199477822  
0.9086533854918355 0.0212403811282134 0.4794151368933218  
0.9115383149429163 0.2760150378182271 0.4871018054856990  
0.9839729885924736 0.5232670966270778 0.9840135836839747  
0.4099366334971511 0.0276516460970525 0.2178388413304179  
0.4774281137305469 0.7631159665925874 0.6804776891915861  
0.3931012722614494 0.4388719860190863 0.6264873600536190  
0.5078666790752111 0.3549993845860862 0.1144689564788379  
0.8955563376611343 0.8643959979351812 0.0708327267741555  
0.9975284631327128 0.9403932221475927 0.5691762848788041  
0.0011927359250318 0.3594372791057628 0.5684759370625028  
0.8965974373885630 0.4394722306799315 0.0725109705623175  
0.4944904086865286 0.9364916733031207 0.1438078661246136  
0.3915447640911450 0.8561944459168380 0.6093909602021569  
0.4866309767387944 0.3841284090857416 0.7423464306895539  
0.4245536267661182 0.4087154270505041 0.2444342786056685  
0.9889190220159876 0.9102878770637403 0.9461583186078573  
0.9060486948583266 0.8891720234242831 0.4454640036879309  
0.9075031519230511 0.4069901484561740 0.4454798380042514  
0.9890649867095701 0.3912276013784708 0.9485109178859722  
0.3915649028327799 0.8972385753937714 0.2559955854363050  
0.4809342545254994 0.8870849812198718 0.7493284704845879  
0.3030858021392637 0.5347801007946226 0.6748540006999726  
0.5980022182478425 0.2736121222871721 0.1979487331576230  
0.8091278546348437 0.7775258172112112 0.9938118412968536  
0.0868746027116841 0.0259839985685825 0.4958309058981413  
0.0941678953803135 0.2767192824501083 0.4962499179768868  
0.8088506224453189 0.5262423013044493 -0.0004413075736505  
0.5822664622686421 0.0278669030421357 0.2068361122571409  
0.3033757489680068 0.7856765678610875 0.7136622568666690  
0.2719253410162296 0.4347920001079688 0.5488982964358389  
0.6332883712734465 0.3604987271984919 0.0573714048120859  
0.7723705914815120 0.8582725987708170 0.1425825721293279  
0.1193216835189946 0.9468116614322892 0.6485054333316986  
0.1217761848091978 0.3547578983843316 0.6507947909187667  
0.7739721022037243 0.4447851636798909 0.1489718369900584  
0.6061228391719787 0.9590737211548707 0.0407577889081310  
0.262937774457866 0.8636901457521849 0.5636826096711643  
0.3301667334462015 0.4446426604260594 0.3689882280888402  
0.5651270434009620 0.3397135202592171 0.8887139845159939  
0.8337318794378721 0.8212096068312861 0.3110503716362764  
0.0675648765186322 0.9803043773004656 0.8249361117335863  
0.0649764854843386 0.3185715602402746 0.8244752298853475  
0.8310897453191880 0.4783386314394171 0.3216739157046023  
0.5678772010159178 0.9597206399846451 0.8500488367684110  
0.3312504024446309 0.8310557118590600 0.4017611782959231  
0.2392307303018480 0.3524831343595482 0.3989744501517267  
0.6465115403804348 0.4453345645471140 0.9044280230153128  
0.7752953166983834 0.9406436470998187 0.3019427757593482  
0.1239421999361029 0.8599257697114554 0.8028533006023058  
0.1119250412189936 0.4424666265737900 0.8027174045168678  
0.7715225305628549 0.3591870786241772 0.3056600711634925  
0.6460733239936786 0.8595910645397845 0.9177631357402339  
0.2603483470175386 0.9454336915739311 0.4040547415602671

0.3921241110961253 0.5388594882769763 0.2663233700861281  
0.5078341179148161 0.2533850069129960 0.7657457505410578  
0.9037406964067447 0.7541043763545209 0.4422729760447311  
0.9846610842355121 0.0456660869776623 0.9406100381578812  
0.9845870567915065 0.2560977872048393 0.9476342712189747  
0.9076252555767880 0.5426683637176724 0.4468522920672314  
0.4726636474788329 0.0228092608244564 0.7528937505910691  
0.3880570468787051 0.7603077524054084 0.2608274549708446  
0.7035412755448098 0.2447321102931578 0.3145825310039156  
0.1896347480760276 0.5521890105419195 0.8125464385692298  
0.1964533883099050 0.0622202106594892 0.3912057385747336  
0.6938300642687288 0.7355708941542185 0.9117932408749433  
0.6939295134147193 0.5692179059272777 0.9192755329478277  
0.2055823016364152 0.2258752633275377 0.4116782564727409  
0.1914298386802928 0.7442740857581248 0.8037708118878191  
0.6970758269181733 0.0480519921444454 0.3060987532570579  
0.5835649589139228 0.2445913189136166 0.3929949000996000  
0.3200165294584551 0.5539040036277499 0.8915111118277905  
0.0843867371338242 0.0536859442631054 0.2976084459883279  
0.8009875175647108 0.7492271615657593 0.7979910428758794  
0.7988361792115261 0.5496674244701489 0.8019009179866035  
0.0970441619276593 0.2502103482270233 0.3002026390142419  
0.3057941109841074 0.7332263406772300 0.8989859124076373  
0.5851226328497391 0.0612536552062785 0.4026427871593153  
0.6169701853606978 0.1501260037631064 0.2594116183855029  
0.2809052185701222 0.6552297485807786 0.7394411158451916  
0.100255652865304 0.1502459212203776 0.4361309095615082  
0.7953408999390486 0.6515707945351714 0.9363400279927433  
0.5245019971129895 0.2544607892843335 0.5680347424229374  
0.3743723991332610 0.5269323292937119 0.0701080771092207  
0.0162854793247192 0.0257953309929704 0.1324715195275994  
0.8740551314765294 0.7722654102286388 0.6352212430745500  
0.8752715124655868 0.5290082465512681 0.6392977791059181  
0.0209256564505251 0.2701583529231478 0.1388732680931878  
0.3698063941396975 0.7659690728569720 0.0662753836948092  
0.5137876036883967 0.0282343592035477 0.5640359764532589  
0.4501116366778584 0.2403890528961229 0.4043760343198199  
0.4509039667345063 0.5637495537317372 0.9187131984939734  
0.9532394139185146 0.0619175649568875 0.3001124012389907  
0.9326620239933492 0.7370141988688936 0.8068124507113182  
0.9284979138180494 0.5672603943033985 0.8135854212089457  
0.9656815568307580 0.2359642522373118 0.3137228957387413  
0.4375144145210632 0.7541928948006689 0.8947642898152401  
0.4538008355609411 0.0685407210720218 0.3976865848091182  
0.4968197416918551 0.1408689902682675 0.6672935080803595  
0.3864839691006249 0.6478544920407410 0.1549066624060150  
0.9986485967246569 0.1494363795119809 0.0633761568662208  
0.8921622677674158 0.6496827711833745 0.5626117843178394  
0.4043066752551417 0.2366490232389706 0.6409924991574308  
0.4910586143406405 0.5653669583509052 0.1412280472273466  
0.8957815260699025 0.0667376500121545 0.0862524041356759  
0.9949858056988997 0.7326854574056324 0.5837890181281644  
0.9971833335078134 0.5696825519940213 0.5870613285558490  
0.8974714558711526 0.2342107605660453 0.0946074508832900  
0.4887150689320562 0.7319305153795221 0.1381680093430334  
0.3918243926897513 0.0688581496250127 0.6119970462795660  
0.2953564530599221 0.1603959708927729 0.6280933341685196  
0.5937556192250352 0.6494876904462239 0.1303749301553693  
0.7935982014981102 0.1515458908905365 0.0739895150495897  
0.1017096525322687 0.6525391081214031 0.5715601211933704  
0.2997139533774667 0.2775092304486037 0.5353065718194633  
0.6007276713303082 0.5269577938888820 0.0474442985760980  
0.7781198680522177 0.0287738474311675 0.1512048688465097  
0.1113599226361433 0.7743178934848702 0.6514502094344614  
0.1148695695285885 0.5297156942252668 0.6515319874787878  
0.7784854820890699 0.2730005847698869 0.1539554605305494  
0.5943522536891176 0.7671310159380784 0.0348362163413334  
0.2727754352028715 0.0381813164887435 0.5481561122151575  
0.3252565322226017 0.2570698745362111 0.3417678787582052  
0.5739640641810538 0.5502635525129855 0.8515998897033012  
0.8244496918188491 0.0626717737141488 0.3346596459536795  
0.0626046913338868 0.7430079979003607 0.8332803971120404  
0.0589746991320605 0.5626997719539841 0.8265684966152194  
0.8341722152609080 0.2427035550721419 0.3308248155418028  
0.5757746644643825 0.7595954643116077 0.8340142754122066  
0.3247786779149565 0.0597274852058638 0.3651145746441802  
0.3957542563885498 0.1538468893413512 0.2737696038935203  
0.4990324568557984 0.6462795358867947 0.7753505596589869  
0.9014860904355967 0.1493685007272256 0.4299289165369741  
0.9917853856863744 0.6518970699256688 0.9329586835856160  
0.5687965652415218 0.5847204258473390 0.5850844539698036  
0.4120039592600881 0.6397266708422715 0.6053777923055252  
0.2459737912914171 0.6832177506264161 0.5396085345985954  
0.6022006292462279 0.7075513347644702 0.6411706923903748  
0.2693553898914295 0.6072120678731763 0.3893273863189846  
0.3208669708983312 0.5851385050034247 0.4593619637945070  
0.6224115641668578 0.4709077674399893 0.3008972712465679  
0.2710445830610265 0.3399149147491182 0.7994050566536306  
0.1224223167715461 0.8288851731784678 0.4022419555843680  
0.7720319642127659 0.9764726742752542 0.8999578584355894  
0.7742467341389022 0.3272327466208125 0.9027370540818399  
0.1231640723704395 0.4753111751849678 0.4037898055962093

0.2760043562577508 0.9806984875878516 0.7965822658193407  
0.6258381483600542 0.8318605710413783 0.2874330075757064  
0.5197106766691141 0.4351223527656463 0.4579507622387445  
0.3788243478668346 0.3657581733250166 0.9502265910465585  
0.0222048840475198 0.8647319789595408 0.2479739522852391  
0.8732183195035574 0.9360676652211896 0.7464462973332645  
0.8746065998004617 0.3659298031183375 0.7492356011650234  
0.0230914449809283 0.4354616355869223 0.2491705740958618  
0.3695070920927735 0.9330053961539830 0.9548177367856094  
0.5212039120948538 0.8702549283001478 0.4385308490440764  
0.4671627012708852 0.4480199902583678 0.6734192403616667  
0.4333748954464344 0.3493707608420169 0.1618231929476725  
0.9713929006385633 0.8539363371084705 0.0305665667391860  
0.9214355456775793 0.9472864158514431 0.5283457198437949  
0.9244701084516602 0.3512824886016495 0.5313176449630405  
0.9726437560554044 0.4486865277229593 0.0317234408201066  
0.4174144176313305 0.951557727242643123 0.1734914512166743  
0.4670064194949681 0.8422449846705732 0.6490671679591202  
0.3148921149222557 0.4550448897964774 0.6473206611476210  
0.5843414831394320 0.3483791082279389 0.1522702774156504  
0.8177710015039338 0.8524898764092121 0.0420399805475958  
0.0759835169076806 0.9519285348566486 0.5458811008714101  
0.0801388400737382 0.3500801976358176 0.5466263630977946  
0.8183125080849728 0.4510528642038817 0.0469914044588967  
0.5729541331606474 0.9549211335069667 0.1516953731759228  
0.3163170450597631 0.8560695364030717 0.6548446148494383  
0.2628646135483093 0.4285395253053933 0.4280814567233104  
0.6339237620433412 0.3668691951226700 0.9350050273483410  
0.7716172480791372 0.8622943856008374 0.2650464823401759  
0.1268786221716812 0.9391601815812136 0.7701321829883103  
0.1226168608603660 0.3638144215505090 0.7730367904125406  
0.7699275210589174 0.4379911893749002 0.2711401353597022  
0.6271504716687317 0.9390471825576230 0.9263025092076327  
0.2644181917844721 0.8670301249052470 0.4409172085560872  
0.4004136242465918 0.4670280117712564 0.3221765069116289  
0.4989439309654089 0.3246032117592264 0.8246549726623092  
0.9018207097514654 0.8223645988523336 0.3747582746156807  
0.9946523243998270 0.9770179124745467 0.8755272075863235  
0.9938365812237741 0.3234843366695213 0.8799192162256242  
0.9019016383125698 0.4752479057370466 0.3782945101265116  
0.4911759800535119 0.9552308623211732 0.8158237544990892  
0.3931530887489122 0.8295981333935512 0.3248090997822702  
0.6258591752031484 0.2285952549589125 0.2913665705099818  
0.1174836736069539 0.0725380897523667 0.4060865546183038  
0.7737297719532100 0.7289448514152305 0.9105290843376105  
0.7739948680876119 0.5738042333116948 0.9142961692950285  
0.1247659704590964 0.2265209709255352 0.4108895583623814  
0.2704083244439592 0.7301354312022658 0.7889382859751818  
0.6207849632855075 0.0714392515886512 0.2929886667589667  
0.5181067213560371 0.2731914638156662 0.4493744305461342  
0.3826376709091917 0.5229325151737524 0.9475840604216610  
0.0163137522080249 0.0209263927504905 0.2549906888491073  
0.8714301985559940 0.7790591860139746 0.7575843849690137  
0.8705552032719784 0.5225365776848264 0.7615442655831960  
0.0254523938549799 0.2781296839031059 0.2607507905476362  
0.3685498834261853 0.7761549526844931 0.9444616178826059  
0.5166384450214009 0.0267533230011110 0.4415996034893989  
0.4823867028081047 0.2210571377120158 0.6601616184763226  
0.4114261168815856 0.5703834732903248 0.1573405870715003  
0.9733568511760581 0.0720882590161422 0.0547218291515400  
0.9165797781928570 0.7273653053246862 0.5556230837632269  
0.9186082372745523 0.5726037925759058 0.5589024528129756  
0.9748322831256226 0.2274582942827088 0.0607764949427783  
0.4091779310153846 0.7262018817500860 0.1543222580807591  
0.4684883781347500 0.0653171928713147 0.6493047835479389  
0.3240761753568241 0.2369395532044531 0.6354028315502499  
0.5706784711480498 0.5711742304878008 0.1405694121411341  
0.8167989538699820 0.0731051595672300 0.0661289898828348  
0.0740501024530296 0.7304783722051834 0.5649285195955458  
0.0763645677683532 0.5736686185941522 0.5671113427658944  
0.8186741520753690 0.2294574660419425 0.0695343401494924  
0.5686396105031017 0.7277709081611110 0.1342885352763194  
0.3132788808874746 0.0803691776549307 0.6334110173451875  
0.2681218750232580 0.2770493922558357 0.4222801394609287  
0.6279944644534626 0.5231928523195566 0.9317380709177174  
0.7690506006231533 0.0200581136628702 0.2729928727104225  
0.1222705589215225 0.7803447507580881 0.7736686323384401  
0.1206440617673690 0.5223444185957573 0.7754305383504327  
0.7720761423105231 0.2795186761920342 0.2764737889560002  
0.6259872747593214 0.7799111125170597 0.9234218739831488  
0.2642992716101720 0.0259585451962508 0.4272349517802424  
0.3990035282106858 0.2320302606020804 0.3094879431490017  
0.4986106080223005 0.5710554427941080 0.8203112783211695  
0.8968073319390447 0.0728241218190683 0.3861941238398046  
0.9922499722645742 0.7284922465946622 0.8888801260335718  
0.9914983053589429 0.5750321672664457 0.8895750503723495  
0.9029895293087522 0.2268913213649179 0.3899162210247205  
0.3957074224795559 0.0763540567900549 0.3135255169098391

Structure TS reaction CH4/5→10 S=10/2

1.000000000000000

20.1473052208878016 0.0000000000000000 0.0000000000000000

0.0000000000000000 19.7681594983396991 0.0000000000000000  
0.0000000000000000 0.0000000000000000 13.2309279702280005  
Al C Fe H O Si  
2 1 2 10 198 94  
Selective dynamics  
Direct  
0.2716596448107396 0.5720150576713863 0.7884406915730651 F F F  
0.4948313635395820 0.7324344834184515 0.8083428416711200 F F F  
0.5139990118330089 0.6664311611644527 0.4365338873543982 T T T  
0.3220841055088965 0.6230873796966325 0.5912247885335564 T T T  
0.4966855197692868 0.6707528332404009 0.6045284072824176 T T T  
0.5502209786787815 0.5457044362960622 0.5820554335624186 T T T  
0.2001907698828121 0.6739080503122067 0.5717175209346377 T T T  
0.2392467524571502 0.66638784784752763 0.4687475834061287 T T T  
0.6043591057821487 0.7324476982187421 0.6997801061262396 T T T  
0.6216701711294659 0.6699048756958565 0.6299748201430296 T T T  
0.2414321950952061 0.5650195412709513 0.3780110351917505 T T T  
0.5456100496081732 0.6212827021632663 0.5048358764491107 T T T  
0.5595935805347453 0.6725623040842321 0.3917864237257115 T T T  
0.4918270679927897 0.7172724772857897 0.4434969089632548 T T T  
0.4777190500166728 0.6337614044545198 0.3986367070875346 T T T  
0.7026094771783207 0.4726560282298777 0.3121889135890186 F F F  
0.1926295453684972 0.3342769117911573 0.8154304959619623 F F F  
0.2028147719310667 0.8245493020363881 0.3955575013843742 F F F  
0.6921540008557798 0.981696963910864 0.8918446062250496 F F F  
0.6943977463892068 0.3215850524644921 0.8885289776646091 F F F  
0.2048707803672301 0.4810879088616602 0.3907591269511599 F F F  
0.1963110454493702 0.9718436747545240 0.8081420757531177 F F F  
0.7048713838303655 0.8252504664619948 0.3065484314801310 F F F  
0.5886331849385371 0.4655413445481855 0.4108878286113367 F F F  
0.3069041563578168 0.3419758721376027 0.9088428867013789 F F F  
0.0934379580574500 0.8355927313864200 0.2885819171785755 F F F  
0.8051280671264465 0.9707210528836399 0.7881356980526490 F F F  
0.8062183727459455 0.3325694416292109 0.7888059084052372 F F F  
0.0926969946066905 0.4677650226302887 0.2902898857013270 F F F  
0.3107835935452243 0.9805211960894979 0.9083218786726519 F F F  
0.5917205350490349 0.8393096159656892 0.3996249897511035 F F F  
0.5993325476839075 0.5398248939966450 0.2439187950128598 F F F  
0.2976592167960277 0.2756910612370191 0.7343324116541581 F F F  
0.0935493030822769 0.7598131730908761 0.4546614295789482 F F F  
0.7996010047139279 0.0442644199614790 0.9549947038433046 F F F  
0.8033095562438106 0.2602429593322597 0.9577640299769286 F F F  
0.0966404098390967 0.5444175779542775 0.4551978433751671 F F F  
0.2918259844499929 0.0535081172877412 0.7448614584385922 F F F  
0.5988910538661258 0.7616908694896267 0.2357444281171013 F F F  
0.6003258666107101 0.4040135457512264 0.2365201024177352 F F F  
0.2882388412957226 0.4114233384945649 0.7409088734787446 F F F  
0.1014913238312403 0.8938520072333489 0.4688583110768079 F F F  
0.7935584624153265 0.9096347411558625 0.9639560014912689 F F F  
0.7931691631411084 0.3943155034870429 0.9659610111746204 F F F  
0.1056505906404368 0.4101100480386606 0.4714672617700373 F F F  
0.3080701601802858 0.9207977128639016 0.7300217848841868 F F F  
0.6098176198701850 0.8958922076730218 0.2184269746765324 F F F  
0.5205298931356452 0.4519247901986176 0.5774062713885613 F F F  
0.3798565186556857 0.3567685117874717 0.0711658430700197 F F F  
0.0218966943947763 0.8611747107933780 0.1262442331224634 F F F  
0.8719465380703610 0.9382941634580533 0.6244340050819304 F F F  
0.8758158030884502 0.3633024310079662 0.6264676123210080 F F F  
0.0222570811125209 0.4399114537056619 0.1272295078763861 F F F  
0.3693748079363246 0.9430195678341065 0.0770108332002692 F F F  
0.5196692409536396 0.8622620504115019 0.5627063648863384 F F F  
0.5127713682815198 0.3551249163428523 0.4347266887509846 F F F  
0.3952306237433945 0.4435046633418906 0.9167134888643034 F F F  
0.0120887422129030 0.9419754261727817 0.2880229633382498 F F F  
0.8782241043708297 0.8583747265103341 0.7877249506952282 F F F  
0.8808389566859418 0.4433265001952265 0.7901528988763644 F F F  
0.0172793119170649 0.3578214072025290 0.2890545816971937 F F F  
0.3524028954422675 0.8555319825965810 0.9241113763080477 F F F  
0.5127486553233851 0.9469644039988765 0.4044114157555825 F F F  
0.4567203506184114 0.4750148558184506 0.4082855007869028 F F F  
0.4357987322988066 0.3180549607983494 0.8979720740324808 F F F  
0.9635480434213903 0.8191490855261492 0.2965947742388337 F F F  
0.9379607671654284 0.9761507749732985 0.7888576666342573 F F F  
0.9374038064167323 0.3235342774038799 0.7931555370578565 F F F  
0.9617568460128822 0.4783242547893352 0.2962520873229764 F F F  
0.4423172252317400 0.9539470333686779 0.9146826572279707 F F F  
0.4619143486917352 0.8241428829663349 0.3924164230644323 F F F  
0.4717057389713375 0.5187982806321116 0.7315830787893844 F F F  
0.4248719899932496 0.2757164206995455 0.2141069468728389 F F F  
0.9806434785539722 0.7790841363149426 0.983773632399454 F F F  
0.9094161819420066 0.0214711457045667 0.4804507308889483 F F F  
0.9119156140818347 0.2761319352243419 0.4866064582913054 F F F  
0.9831214777877477 0.5235484930081213 0.9843876888610694 F F F  
0.4096216250024298 0.0264422580232591 0.2180834687705016 F F F  
0.4760260559043346 0.7638265256949310 0.6839213440479526 F F F  
0.3932487215801928 0.4382855179222744 0.6249589790758634 F F F  
0.5084778363251772 0.3537266805029233 0.1137030918606143 F F F  
0.8956636161044287 0.8647692671811882 0.0717341835535379 F F F  
0.9977859316271491 0.9399616078199173 0.5698426834282060 F F F  
0.0013514909364574 0.3601998947751355 0.5670398858327914 F F F  
0.8960697149057495 0.4393330044372306 0.0724337441830585 F F F  
0.4947911692162634 0.9366537697884922 0.1416089447554967 F F F

0.3920203298807223 0.8576540103404113 0.6107479615929563 F F F  
0.4872363984203076 0.3846413530373738 0.7410373000791921 F F F  
0.4253373562790728 0.4089169813547358 0.2427275701769744 F F F  
0.9890083650116068 0.9102445572746021 0.9467655796771837 F F F  
0.9061518139047422 0.8895022241942598 0.4456584985473526 F F F  
0.9069692707070018 0.4071354219787651 0.4448625106980018 F F F  
0.9889073593993061 0.3916155918182582 0.9484064379789530 F F F  
0.3944150145430640 0.8956759636974354 0.2571728518102816 F F F  
0.4817265055794024 0.8880914275795107 0.7510568656000913 F F F  
0.3038054955038945 0.5350139768089335 0.6728217312898437 F F F  
0.5997557679412324 0.2731085045501302 0.1954354793494844 F F F  
0.8100649702362972 0.7773319089261008 0.9943716489882206 F F F  
0.0868406260895895 0.0256307708435131 0.4958082011527267 F F F  
0.0944825179908690 0.2767666416926460 0.4969220228312281 F F F  
0.8079389495883547 0.5260206362546498 0.0000873646733339 F F F  
0.5827507236763196 0.0269866675471135 0.2070208304030814 F F F  
0.3038869487891844 0.7858964324526454 0.7135088303664432 F F F  
0.2719252240949857 0.4348275194573361 0.5476447497790389 F F F  
0.6336518262533914 0.3608110102763504 0.0550039116936887 F F F  
0.7721529141808716 0.8581717066793644 0.1426209101391933 F F F  
0.1197298491065268 0.9466264171265735 0.6485566860471792 F F F  
0.1214187019395467 0.3556403140459494 0.6508383544281031 F F F  
0.7730418329421482 0.4428802858776635 0.1476253259404885 F F F  
0.6081898157921515 0.9570668419429254 0.0424747141141211 F F F  
0.2633938568269798 0.8641046394549079 0.5640368593263076 F F F  
0.3308811457816532 0.4439945824211478 0.3682192885308311 F F F  
0.5650838749788036 0.3392889049364101 0.8874513008022689 F F F  
0.8337523432704401 0.8218984510705027 0.3109597315288752 F F F  
0.0674548625635083 0.9796476719811196 0.8248268130366014 F F F  
0.0656089636607859 0.3190813447063618 0.825220698705699 F F F  
0.8316553690579198 0.4772587090969367 0.3181609120442843 F F F  
0.5673198467381084 0.9616839027678168 0.8530219938235746 F F F  
0.3316385628422793 0.8310729699079928 0.4022343543986722 F F F  
0.2397800350933039 0.3520049784798829 0.3977222413455053 F F F  
0.6456173842104960 0.4456257236714336 0.9014305218377245 F F F  
0.7738787366032156 0.9405857456057873 0.3021202042437778 F F F  
0.1251397700614589 0.8597147104983307 0.8027194600710246 F F F  
0.1133876551158579 0.4426280386009083 0.8038882038987225 F F F  
0.7705786182860948 0.3585470047373533 0.3058620952442723 F F F  
0.6448377706826420 0.8592865172666535 0.9142964902855226 F F F  
0.2607689603150050 0.9455722075527504 0.4043048921161798 F F F  
0.3912021956330207 0.5386338142655234 0.2649501137401771 F F F  
0.5078600438629337 0.2535212596104799 0.7640045544307981 F F F  
0.9031405066537346 0.7544186878476253 0.4422044251140420 F F F  
0.9851463962993137 0.0456406295626977 0.9408287800153090 F F F  
0.9850004165631816 0.2564060603479916 0.9475340054688530 F F F  
0.9052375404424566 0.5429068841538509 0.4457914501667659 F F F  
0.4726040355624477 0.0238163122489752 0.7538028456161356 F F F  
0.3885298710809479 0.7590769363055898 0.2622457228629429 F F F  
0.7039729866203430 0.2429349557050742 0.3138478829787203 F F F  
0.1899574798188013 0.5531559817047409 0.8095346321287096 F F F  
0.1964611651088859 0.0621999381633529 0.3918837009215963 F F F  
0.6946090486082070 0.7359855838335392 0.9127454912591375 F F F  
0.6938310020641083 0.5692911116305623 0.9173553226207218 F F F  
0.2055033963553328 0.2256219415355574 0.4115732550924136 F F F  
0.1917379211784151 0.7434988965176288 0.8022990184653764 F F F  
0.6972052666247848 0.0490588756571597 0.3065458486983275 F F F  
0.5837187382760973 0.2461935868490315 0.3909965902724863 F F F  
0.3204078148678349 0.5534524108488128 0.8897482288006984 F F F  
0.0844749730120498 0.0541116389712357 0.2978201625287866 F F F  
0.8016675557808526 0.7487880027750293 0.7986406248055431 F F F  
0.7996657920234753 0.5499046594000347 0.8022430121065085 F F F  
0.0969011988598822 0.2503853066197550 0.3007241645826468 F F F  
0.3058330900209825 0.7330686694285902 0.8986298647422188 F F F  
0.5849306715759752 0.0596810348327637 0.4029164572882280 F F F  
0.6154981970463993 0.1496944826931710 0.2600515780179791 F F F  
0.2819970288388589 0.6552785892883932 0.7383307285310252 F F F  
0.1001834367758221 0.1502497903636097 0.4368046273174926 F F F  
0.7954798217125401 0.6513281758365750 0.9372560544811392 F F F  
0.5251774981068067 0.2545657906707319 0.5664178017946568 F F F  
0.3741425404567238 0.5274124215092257 0.0685246266429758 F F F  
0.0164211637423861 0.0259434568576324 0.1327258758986147 F F F  
0.8741218013584060 0.7724245972358972 0.6353770056957799 F F F  
0.8752300363732175 0.5289179391221595 0.6389030734972962 F F F  
0.0210450104791420 0.2702748029298689 0.1388305179903710 F F F  
0.3682969845717707 0.7661600974320351 0.0677447221326375 F F F  
0.5133556015807557 0.0270964767228321 0.5645224389103305 F F F  
0.4504883388717573 0.2393118845685791 0.4035143397283534 F F F  
0.4512048373236226 0.5645138399018492 0.9172101910846422 F F F  
0.9532506170298518 0.0614898721806725 0.3004499933901101 F F F  
0.9335638580240442 0.7374242014146191 0.8061861329607254 F F F  
0.9295575806924106 0.5669970569612914 0.8122009237206100 F F F  
0.965685898431338 0.2357782499423635 0.3132679402477763 F F F  
0.4377057601310028 0.7531735656549330 0.8984227159007929 F F F  
0.4537032049042011 0.0670003219172344 0.3976634379265960 F F F  
0.4976988580886825 0.1408854597583513 0.6654945655144573 F F F  
0.3873061224887806 0.6478308087647520 0.1541110928415748 F F F  
0.9987984107391839 0.1495882789011489 0.0632021184214508 F F F  
0.8912699677068119 0.6498078485242331 0.5623669306750685 F F F  
0.4048411882122949 0.2361614364702049 0.638659222566847 F F F  
0.4909096324428504 0.5641229921347346 0.1407598075880045 F F F  
0.8959827283792237 0.0668169720054550 0.0861891588228758 F F F

0.9946421710047915 0.7321168437615810 0.5827087354226705 F F F  
0.9964644316593763 0.5697516451010998 0.5835194606510257 F F F  
0.8975520516040092 0.2343772793106567 0.0938040634483670 F F F  
0.4884428091602828 0.7334162781172253 0.1369818189909466 F F F  
0.3919381940922406 0.0692815052111939 0.6123736658404937 F F F  
0.2953629005545864 0.1605922141748550 0.6289503664538927 F F F  
0.5924657933719431 0.6493605149370723 0.1285542413145393 F F F  
0.7937689024247234 0.1515651254812909 0.0737500521653303 F F F  
0.1015143000106846 0.6521107372936115 0.5722493393990931 F F F  
0.2996711417386280 0.2774004637387009 0.5348617184693225 F F F  
0.6001497640917322 0.5272021811679224 0.0446059193148045 F F F  
0.7784388071135240 0.0290311130860843 0.1519805522805910 F F F  
0.1104718175457293 0.7740783761374033 0.6518498807269495 F F F  
0.1129450148817313 0.5288574232456043 0.6515904770246763 F F F  
0.7786968673971728 0.2729701004209915 0.1537702387827977 F F F  
0.5952462323331744 0.7680272201858358 0.0357137915241665 F F F  
0.2729955022718258 0.0383690471924680 0.5486552051477105 F F F  
0.3253368119774365 0.2555617675952249 0.3415740524753303 F F F  
0.5738616038741142 0.5514659988511141 0.8488610161866390 F F F  
0.8245937773095378 0.0618437184201568 0.3360250379643901 F F F  
0.0632926742519402 0.7432209385316781 0.8349094288289436 F F F  
0.0598013601715266 0.5625850307376368 0.8285844694619016 F F F  
0.8343149994954686 0.2425077750967475 0.3306821858863600 F F F  
0.5761581953583246 0.7567165953136126 0.8351543920248261 F F F  
0.3246928030810707 0.0600433024531029 0.3651963525591455 F F F  
0.3966120907333845 0.1529694030672886 0.2728938974291566 F F F  
0.4970125563203638 0.6466578409322139 0.7722593751694262 F F F  
0.9016895997766312 0.1493241180924230 0.4299341158609593 F F F  
0.9915979297810864 0.6519749456838682 0.9328970943137307 F F F  
0.5658860740885273 0.5926248865531657 0.5808806866240143 T T T  
0.4097030833335746 0.6448445007432233 0.5965933824662578 T T T  
0.2431696682645109 0.6827830294698805 0.5393656530008984 T T T  
0.5983400321962105 0.7134436134774962 0.6312856967556373 T T T  
0.2671286534171611 0.6074723928384081 0.3877834710818372 T T T  
0.3179751822972450 0.5853786902219560 0.4581523082367875 T T T  
0.6227678248946020 0.4706213207396175 0.2994194660959764 F F F  
0.2716878924842518 0.3404109798418631 0.7985219231389991 F F F  
0.1227677817148276 0.8285480623512598 0.4026244747297341 F F F  
0.7720939019811297 0.9761927948183953 0.9002675361775658 F F F  
0.7743186907709187 0.3271335481759508 0.9014199436152239 F F F  
0.1237479245718305 0.4751229242504280 0.4029524594870963 F F F  
0.2758284136797897 0.9810078865980785 0.7975918402356896 F F F  
0.6255575160162579 0.8305062482563912 0.2886209619229163 F F F  
0.519778088924281 0.4353705601790026 0.4564151871349011 F F F  
0.3794023603203840 0.3659612654636675 0.9493060537751177 F F F  
0.0225704520537349 0.8646261124074570 0.2483655240958385 F F F  
0.8732310693471845 0.9360233017117281 0.7468244552108843 F F F  
0.8751213810629466 0.3658824999872863 0.7486959920188667 F F F  
0.0231229187125734 0.4355907289863410 0.2492416567167766 F F F  
0.3690037983140471 0.9327574752747552 0.9557586247204171 F F F  
0.5214966754515160 0.8686326782542508 0.4405941053883282 F F F  
0.4675846978499720 0.4481816626350152 0.6713148398046158 F F F  
0.4339780398638666 0.3489516167541709 0.1609798489412597 F F F  
0.9714049089408476 0.8539350163133719 0.0311723903741310 F F F  
0.9217385372435274 0.9473228606625099 0.5289296256881855 F F F  
0.9245590515940592 0.3515436657663358 0.5305060358195774 F F F  
0.9720819786209063 0.4488380510004077 0.0318301784461141 F F F  
0.4179387205327174 0.9504647301575062 0.1737193742851559 F F F  
0.4671452168323924 0.8428702027570836 0.6513779381758269 F F F  
0.3152877144638850 0.4549199658549554 0.6457559820313037 F F F  
0.5852932501153774 0.3479684278740152 0.1503942032544927 F F F  
0.8179857765352168 0.8524048645153428 0.0425151879116683 F F F  
0.0761646994809553 0.9516198634971573 0.5461323705456991 F F F  
0.0803209824916067 0.3504215202625147 0.5463062877119924 F F F  
0.8177715022413281 0.4505644084138467 0.0463859752604634 F F F  
0.5733392953030858 0.9539811580731055 0.1522328064465555 F F F  
0.3165964073293068 0.8566523626249705 0.6554579746420117 F F F  
0.2633312008247941 0.4280963572764946 0.4267531145287222 F F F  
0.6339075804469871 0.3670941910504837 0.9326957695762701 F F F  
0.7711604256182198 0.8622532004019732 0.2650901308579634 F F F  
0.1271192203930482 0.9390329552409327 0.7702067080200692 F F F  
0.1231518387395880 0.3640358669761028 0.7730840099739211 F F F  
0.7695771057573140 0.4371457952282185 0.2699853535245609 F F F  
0.6272671250693023 0.9388134806712145 0.9266157029111781 F F F  
0.2648163812631665 0.8671997072129969 0.4412329145118434 F F F  
0.4008430311874775 0.4668698710001351 0.3207813035223452 F F F  
0.4990263088820655 0.3247642433044504 0.8228865994432866 F F F  
0.9017265784540243 0.8227497693736225 0.3748608793850536 F F F  
0.9947119984871549 0.9768632627494682 0.8759200001676319 F F F  
0.9941976093524119 0.3238564235298540 0.8798942807485801 F F F  
0.9014640043061632 0.4752596017393032 0.3773605893127652 F F F  
0.4909688362513478 0.9565168514139160 0.8174332988462041 F F F  
0.3941794090539972 0.8282350970293990 0.3265032787360553 F F F  
0.6260449475110619 0.2283427903634205 0.2901743196349571 F F F  
0.1174790594747179 0.0725845394722029 0.4065054947319240 F F F  
0.7743876533584597 0.7287897865155344 0.9112676547881051 F F F  
0.7739518944416375 0.5737123951146046 0.9142179016557321 F F F  
0.1246956322622950 0.2265232111454836 0.4112947618296374 F F F  
0.2708602673940916 0.7301107705708390 0.7882272470734577 F F F  
0.6205069614887719 0.0710286237531577 0.2934050796841490 F F F  
0.5179845616713266 0.2736126377751162 0.4479126560612556 F F F  
0.3831908112850755 0.5231157885319817 0.9462442082499081 F F F

0.0165686006411363 0.0209642916142414 0.2552181429978546 F F F  
0.8717791323075019 0.7790573087339467 0.7577623296007729 F F F  
0.8710143027965032 0.5224949123952314 0.7611560893205009 F F F  
0.0253979791733911 0.2782220146423811 0.2607382834947529 F F F  
0.3681692159063417 0.77591473855363931 0.9457230191908010 F F F  
0.5164330158066406 0.0252586784086759 0.4420509825282650 F F F  
0.4829725267234153 0.2210581028733145 0.6582804066954608 F F F  
0.4113854894304723 0.5701125651301311 0.1563086872782904 F F F  
0.9735679151206966 0.0722003074701973 0.0548220646830018 F F F  
0.9160724768623254 0.7273359487162949 0.5553220309968481 F F F  
0.9175536988556843 0.5726874442029271 0.5575910781693167 F F F  
0.9750018964588065 0.2276277858177878 0.0605447793459817 F F F  
0.4090951667250735 0.7263634644391672 0.1544829179403919 F F F  
0.4686570624497577 0.0654485737637174 0.6493412421964777 F F F  
0.3246252657561044 0.2370141746475412 0.6347786232756008 F F F  
0.5705242344759327 0.5706712196827155 0.1387421789484904 F F F  
0.8169538178304663 0.0731164304608853 0.0664529873020570 F F F  
0.0737440344110993 0.7300749842650802 0.5649377270830414 F F F  
0.0758540296007197 0.5732715751383850 0.5662670276158153 F F F  
0.8186813581202657 0.2295471520594106 0.0690887240605420 F F F  
0.5684002302366125 0.7278767994212387 0.1338610321502216 F F F  
0.3134307294979166 0.0805867515250398 0.6340384908584369 F F F  
0.2683042068323687 0.2764936794879205 0.4216981013240186 F F F  
0.6276615498379172 0.5235589300293384 0.9290281025230414 F F F  
0.7688745809856457 0.0201711636145703 0.2736497955129877 F F F  
0.1225301181688891 0.7801254268054265 0.7737792220875903 F F F  
0.1207193952707115 0.5223951448827293 0.7752994988471116 F F F  
0.7720222452218621 0.2789731830554700 0.2763067125621248 F F F  
0.6262644006464271 0.7794091070437830 0.9234294705097312 F F F  
0.2644497699660704 0.0261304566691365 0.4276934751767456 F F F  
0.3992616651263248 0.2311848167647526 0.3088615294857178 F F F  
0.4983068391742762 0.5709715873775707 0.8178211785256622 F F F  
0.8970519938697592 0.0726279655888362 0.3868322927928247 F F F  
0.9924962666505337 0.7286469776060756 0.8892496978197428 F F F  
0.9916290034553654 0.5750347464494467 0.8898181162569756 F F F  
0.9031146220754067 0.2268069212855437 0.3897136181832863 F F F  
0.3958086920891262 0.0756291248270031 0.3133707403237054 F F F

Structure CH4/11 S=10/2

1.0000000000000000  
20.1473052208878016 0.0000000000000000 0.0000000000000000  
0.0000000000000000 19.7681594983396991 0.0000000000000000  
0.0000000000000000 0.0000000000000000 13.2309279702280005

Al C Fe H O Si

2 1 2 12 199 94

Selective dynamics

Direct

0.2724131344859444 0.5717343841654596 0.7895941384831744 F F F  
0.4935307872349100 0.7294388898909148 0.8145530627631530 F F F  
0.4950542372377635 0.6597378620561516 0.3958285205223252 T T T  
0.3300026932192408 0.6242945083370395 0.5908909598190299 T T T  
0.4676635347683092 0.6604372487465870 0.6206498725917446 T T T  
0.4364030247044492 0.5568034840817181 0.5123212921368214 T T T  
0.6313139415311994 0.7652691889639935 0.4708596461984089 T T T  
0.6567906326911038 0.6970923519710013 0.4256937756401197 T T T  
0.1974752722392608 0.6588086536085349 0.5750389256199857 T T T  
0.2396460583152735 0.6572604284211034 0.4729550544729675 T T T  
0.5910896850742071 0.6647809231260607 0.6781139008758246 T T T  
0.5995363050093093 0.6815137702527055 0.5605745739393738 T T T  
0.2514257749660209 0.5681158503930487 0.3739690601090904 T T T  
0.5282349468153433 0.6221235081942768 0.4296206765127547 T T T  
0.5234814829401234 0.6926951188242485 0.3455428341268513 T T T  
0.4713898805475619 0.6929903394507920 0.4522880185170795 T T T  
0.4549047254430916 0.6341021376399903 0.3555275938622883 T T T  
0.7026408748841888 0.4758440012654006 0.3109767625995588 F F F  
0.1939568221139467 0.3333169617817973 0.8123517998084893 F F F  
0.2056405613560699 0.8224478870471970 0.3986093414290153 F F F  
0.6929028559078816 0.9709410158004843 0.8849561753380328 F F F  
0.6929736989162762 0.3284112263190408 0.8837565659286284 F F F  
0.2065291539105871 0.4831607701009375 0.3924010111184657 F F F  
0.1995064028425446 0.9685845970670854 0.8068445000129714 F F F  
0.7050521737197499 0.8230219222166042 0.3031362989904309 F F F  
0.5912446024417122 0.4621152285803305 0.4155855627031926 F F F  
0.3061108616030523 0.3406876698949048 0.9101967374398043 F F F  
0.0953550914810393 0.8346449232761444 0.2923076614383291 F F F  
0.8094871859669368 0.9734365174877482 0.7915871449402303 F F F  
0.8069719639646351 0.3329352296090065 0.7887915653045638 F F F  
0.0942739889449129 0.4667877461349121 0.2905090275234059 F F F  
0.3128447795196152 0.9838444524687517 0.9059179154298818 F F F  
0.5949030896113570 0.8413797491841137 0.4029888781028816 F F F  
0.5935901527363470 0.5394188972493907 0.2528992983536469 F F F  
0.3005530570639721 0.2765083522740710 0.7341512269069312 F F F  
0.0964645179739065 0.7578929498227467 0.4573953930966255 F F F  
0.7905872163510423 0.0440875715962008 0.9594091104613867 F F F  
0.7985652140314272 0.2626596584154512 0.9589392599893856 F F F  
0.0964221917155044 0.5429221260883921 0.4561555859035096 F F F  
0.2900751267083379 0.0547801962235752 0.7413863006816328 F F F  
0.5947546119889040 0.7611252866661786 0.2452030238604195 F F F  
0.6019642785685519 0.4045344662341748 0.2364318635992149 F F F  
0.2901395483585958 0.4121613895817688 0.7415103655314326 F F F  
0.1049734802637872 0.8923378902703263 0.4721126486337894 F F F  
0.7977888350130229 0.9092042142879677 0.9641380579794117 F F F



0.7929639670382542 0.3974895801619169 0.9623664639916072 F F F  
0.1089601480862115 0.4087177361794829 0.4701920610011712 F F F  
0.3136831196271714 0.9233387239639868 0.7272178269722076 F F F  
0.6087863819386641 0.8952804166803645 0.2187059313080937 F F F  
0.5249196451987928 0.4419044091118636 0.5831350730009035 F F F  
0.3788731650485317 0.3534003706969671 0.0755510062940132 F F F  
0.0242115776532117 0.8608412469433375 0.1298822268680766 F F F  
0.8736103571380553 0.9385400385928975 0.6267549603852487 F F F  
0.8771425719947246 0.3628489658141589 0.6276278414347871 F F F  
0.0203837661318857 0.4412965128284085 0.1302349381608323 F F F  
0.3693545451869866 0.9454090927330299 0.0767952675993016 F F F  
0.5228189139983854 0.8612852082570512 0.5628779615151487 F F F  
0.5132882403556422 0.3530926603894216 0.4308928000657062 F F F  
0.3943349003080030 0.4405588108477971 0.9234760627853404 F F F  
0.0156901992047196 0.9426229585453711 0.2908645753473422 F F F  
0.8789962448180688 0.8587491426954088 0.7899091675839998 F F F  
0.8824524956457864 0.4436858433526396 0.7899371789694243 F F F  
0.0168895259033945 0.3576842122193113 0.2902400101569285 F F F  
0.3486066280881062 0.8573985518913148 0.9273532421970430 F F F  
0.5132555897280824 0.9470428175504395 0.4030238009642062 F F F  
0.4592432651863376 0.4729476781290103 0.4134235560914732 F F F  
0.4347339917137347 0.3139487370386078 0.9032173612313272 F F F  
0.9651215167351594 0.8205836533953175 0.3006522921455854 F F F  
0.9425337613281002 0.9745862368000218 0.7890872822106232 F F F  
0.9382818118003655 0.3236690097118782 0.7951861971875971 F F F  
0.9638784296700322 0.4793039611327998 0.3032634916568924 F F F  
0.4425742580212884 0.9522090466042528 0.9143731017688452 F F F  
0.4651977537666596 0.8240968057002931 0.3905385083949042 F F F  
0.4829939253924138 0.5076239505210509 0.7512229873561296 F F F  
0.4284675304141672 0.2745939470662293 0.2174293503622522 F F F  
0.9809052220776096 0.7790177265392231 0.9877333224484488 F F F  
0.9124535243542269 0.0229265033659516 0.4851650526598661 F F F  
0.9129952584856582 0.2757789997020836 0.4877729222518141 F F F  
0.9790700090656443 0.5237093733881508 0.9864998496092596 F F F  
0.4123578935812517 0.0257915037649425 0.2187739423028745 F F F  
0.4881800763523856 0.7650216224743076 0.6923572251895393 F F F  
0.3967655068698122 0.4399066861598016 0.6286476538032701 F F F  
0.5084946485277442 0.3551453139051901 0.1149690058006669 F F F  
0.8976983202854214 0.8652671169073756 0.0775289255136826 F F F  
0.9988775492400279 0.9367247848298490 0.5687116154622416 F F F  
0.0017646554536768 0.3624823213273345 0.5633412774239730 F F F  
0.8940579891418423 0.4388918331306684 0.076066459440783 F F F  
0.4958002504682213 0.9367241868049021 0.1364869922125180 F F F  
0.3973367503469731 0.8540031671494788 0.6167778111285003 F F F  
0.4827147476818112 0.3765973775098317 0.7410598695320232 F F F  
0.425325555359132 0.4076578027095721 0.2458574119430494 F F F  
0.9901218101706206 0.9102212172165167 0.9507114989902092 F F F  
0.9039080100972399 0.8918839901573605 0.4451567351228363 F F F  
0.9039001472002397 0.4066284536263112 0.4451345072252408 F F F  
0.9874480364947189 0.3915786959911358 0.9521881176028941 F F F  
0.3972436291131061 0.8943359568011715 0.2542943595151144 F F F  
0.4887635504537613 0.8912104438061945 0.7507067269305168 F F F  
0.3094722540611130 0.5367281415262113 0.6764956329851941 F F F  
0.6003217099099416 0.2741258905454700 0.1953906334422726 F F F  
0.8148602726588621 0.7771496134779312 0.9958678847568549 F F F  
0.0865679441920548 0.0242755563139738 0.4959605258419586 F F F  
0.0954285675906661 0.2765624125418071 0.5013196145418135 F F F  
0.8069882919647924 0.5275377961304599 0.0051024480909660 F F F  
0.5833456301912108 0.0260792515617538 0.2050661956428002 F F F  
0.3045776796407651 0.7886279317810647 0.7220390768903826 F F F  
0.2758885891154961 0.4377035214565765 0.5485661296002178 F F F  
0.6326578744315157 0.3621556103126480 0.0530126311350898 F F F  
0.7720993268206513 0.8589437038399623 0.1409499572877380 F F F  
0.1196599628061605 0.9466020856904152 0.6506699339330098 F F F  
0.1199160566245112 0.3588205832219060 0.6526835233681538 F F F  
0.7692481693652127 0.4398117134868897 0.1456529404840694 F F F  
0.6120488389993710 0.9542542501203499 0.0419194364564390 F F F  
0.2692170263750100 0.8617236979289729 0.5649742629499883 F F F  
0.3321998746992776 0.4510448584511124 0.3675797768505973 F F F  
0.5634756976969371 0.3342244940496428 0.8879523378948804 F F F  
0.8346677230635393 0.8240078352442808 0.3077990590566486 F F F  
0.0713606871567620 0.9775989746972513 0.8302483262238525 F F F  
0.0666162857362096 0.3218752402268805 0.8283787347617704 F F F  
0.8328547258779651 0.4736979574306091 0.3099261374306650 F F F  
0.5661855726817109 0.9720476223653023 0.8563306463951008 F F F  
0.3345947115224774 0.8298725761677517 0.3998657707592415 F F F  
0.2444713502885705 0.3550968086703534 0.3965051384542448 F F F  
0.6322608776919409 0.4483172933177784 0.8981607216744791 F F F  
0.7697153029796482 0.9403394193134886 0.3022719171195973 F F F  
0.1274146807422483 0.8575860453704536 0.8028780556552562 F F F  
0.1182276546612968 0.4438521339735146 0.8091391387985780 F F F  
0.7649637612789277 0.3582908800958933 0.3075735909257062 F F F  
0.6263232634974116 0.8561496352996585 0.9035304957392114 F F F  
0.2632836893615789 0.9435826147654964 0.4058227318334531 F F F  
0.4016874189195292 0.5399126065009199 0.2672826314224181 F F F  
0.5052765263473020 0.2474704219606920 0.7674365417252176 F F F  
0.9000731092948229 0.7562906730609953 0.4419955308175503 F F F  
0.9878385252867901 0.0456487656211024 0.9411064331959693 F F F  
0.9875107769460669 0.2562036436125510 0.9482830473207358 F F F  
0.8964255229083022 0.5426485983886522 0.4441663859090852 F F F  
0.4677304326182252 0.0252814923506364 0.7536489083814217 F F F  
0.3934660762333237 0.7578477943304236 0.2610576220873568 F F F

0.7034923113709937 0.2398524200114451 0.3132798436971029 F F F  
0.1889105901749701 0.5583182239072570 0.7943043226137121 F F F  
0.1942958564762947 0.0570104843527659 0.3861896157501477 F F F  
0.6987013793082681 0.7443102841933253 0.9106389886778743 F F F  
0.6946623631330198 0.5662607241607063 0.9123057964751879 F F F  
0.2063421836090455 0.2292135392253769 0.4108119620489319 F F F  
0.1921394254775706 0.7397390689192065 0.7981476146848507 F F F  
0.694983900695253 0.0498734221541213 0.3101131891933449 F F F  
0.5837067752561467 0.2437911651808164 0.3912010334058351 F F F  
0.3119098320556404 0.5456115108339077 0.8971864880917479 F F F  
0.0790321911282703 0.0598721011131360 0.3005237904405647 F F F  
0.8069268780922556 0.7462883301262906 0.8004160650666492 F F F  
0.8033425811195727 0.5513786293141578 0.8061969820734731 F F F  
0.0953394973413424 0.2494379947112506 0.3048974936347193 F F F  
0.3027401123325504 0.7343019295110835 0.9049600754590159 F F F  
0.5814582995917661 0.0614367309030115 0.4012006425363026 F F F  
0.6134427872255372 0.1494531783540936 0.2562587475382259 F F F  
0.2878569433187366 0.6553509701096374 0.7451485605083477 F F F  
0.1045883129978122 0.1501049537659753 0.4428943057820405 F F F  
0.7929297370711055 0.6519396556024617 0.9418659700093244 F F F  
0.5261461681633648 0.2555954344312212 0.5684199835976287 F F F  
0.3705800231914154 0.5249188484478609 0.0756271601191045 F F F  
0.0141513355706095 0.0257249711259675 0.1341797605747317 F F F  
0.8768517550804376 0.7737448240953313 0.6364450106607222 F F F  
0.8737216777377412 0.5296527828583208 0.6390851129934916 F F F  
0.0212183461301407 0.2695459191363128 0.1404163247501060 F F F  
0.3686399786594166 0.7671542014577994 0.0695535671186036 F F F  
0.5111891291249293 0.0240693140808830 0.5647413108697137 F F F  
0.4510457315984979 0.2362702617687447 0.4065552798882237 F F F  
0.4420817566259956 0.5639003998879488 0.9225342529375169 F F F  
0.9475602152848737 0.0579129402462044 0.2988634318633316 F F F  
0.9390320144838000 0.7398992898646384 0.8052371911784206 F F F  
0.9338270084802573 0.5665708913057443 0.8081071761482974 F F F  
0.9639984362204572 0.2357696935487823 0.3125333141963296 F F F  
0.4344332905486823 0.7566768378733073 0.8971081795157190 F F F  
0.4502725794788915 0.0656279037295846 0.4006978636412128 F F F  
0.4988684119601814 0.1393020776996892 0.6590490928538060 F F F  
0.3916347252210244 0.6471914663443883 0.1514868067918087 F F F  
0.9953783314162123 0.1494315027615656 0.0654861539676617 F F F  
0.8859628205871530 0.6507849974974746 0.5599252461000290 F F F  
0.4052251249315404 0.2337246733504443 0.6356112128137283 F F F  
0.4930355086158968 0.5619284610034114 0.1281202721784069 F F F  
0.8939808236210638 0.0639452386452319 0.0794220907381344 F F F  
0.9936261225774601 0.7277892432036808 0.5758966773843071 F F F  
0.9920295336545237 0.5719683898154173 0.5730449391371764 F F F  
0.8967819047318031 0.2383131680748249 0.0904647217563763 F F F  
0.4909079352419567 0.7344931140628290 0.1285757743114573 F F F  
0.3902400868486140 0.0709084214327476 0.6091466096542888 F F F  
0.2934901267046754 0.1621589353018820 0.6264830166968238 F F F  
0.5935843479267930 0.6489820051183415 0.1386020848696745 F F F  
0.7947758972433689 0.1530335846484192 0.0735876514194516 F F F  
0.1007935941943003 0.6492968130079362 0.5750366644577412 F F F  
0.3006983181528327 0.2795792370812862 0.5348544275969829 F F F  
0.6102814033160868 0.5275296374479694 0.0556784879348911 F F F  
0.7786221612770703 0.0324067431540271 0.1581934796059059 F F F  
0.1054280763075539 0.7719149037614983 0.6557198976928049 F F F  
0.1015295599526311 0.5248239015695688 0.6541251622563138 F F F  
0.7785752494332456 0.2738460590795526 0.1555660569869133 F F F  
0.6067666106027332 0.7685250203040965 0.0482468760027857 F F F  
0.2711907285869373 0.0405630923218681 0.5447556368956867 F F F  
0.3268144635144594 0.2556548301562103 0.3418572835014686 F F F  
0.5694237995359899 0.5666286596759491 0.8724294816191431 F F F  
0.8212740321773282 0.0595392752389685 0.3471537125381445 F F F  
0.0669111709211592 0.7417558015813839 0.8445781488815385 F F F  
0.0625360171926062 0.5624183504561984 0.8392327762332528 F F F  
0.8331616658616028 0.2442657852911339 0.3337566419307336 F F F  
0.5743761934458860 0.7350993119321387 0.8572403300551699 F F F  
0.3223722237455533 0.0590649810757995 0.3595067898093660 F F F  
0.3967648611080463 0.1522147297323997 0.2727599192182524 F F F  
0.4813659082196651 0.6422799559837671 0.7756523098552108 F F F  
0.9011647865477386 0.1493218335868391 0.4296209900182220 F F F  
0.9896121765666521 0.6519430553702747 0.9358788549756767 F F F  
0.4314977147899511 0.5753441868288843 0.5805411859927123 T T T  
0.3873667004140149 0.6997814838257796 0.5971341146517479 T T T  
0.6472725172589809 0.7198272019327102 0.4893482526391157 T T T  
0.2406616905492315 0.6711656396012478 0.5460389913495503 T T T  
0.5707211174446323 0.6564482562427060 0.6122536055637187 T T T  
0.2761509613746935 0.6109458234557456 0.3840974533811443 T T T  
0.3278082537882935 0.5899470623354706 0.4543429195405416 T T T  
0.6224688670175524 0.4701656537532131 0.3028469968464691 F F F  
0.2731461457605491 0.3407385273964820 0.7980336360878511 F F F  
0.1255772231488095 0.8268420340072993 0.4058477147498465 F F F  
0.7722290787047044 0.9743205273179285 0.9008432795256454 F F F  
0.7726871053505207 0.3299261442500665 0.8999505295550705 F F F  
0.1256504614310217 0.4748580057045473 0.4030888710789142 F F F  
0.2782785785824231 0.9817246465762040 0.7948545205668864 F F F  
0.6257087973856841 0.8310684848155105 0.2889868096867261 F F F  
0.5223671989799428 0.4320784036312801 0.4618453313299327 F F F  
0.3785628729392201 0.3624949898944791 0.9534226534091133 F F F  
0.0249778969189194 0.8648789751572892 0.2520617783711856 F F F  
0.8760766074475086 0.9364749934882113 0.7491214272421090 F F F  
0.8762386589484947 0.3659840117547901 0.7496940798544927 F F F

0.0234535900005852 0.4358615159976935 0.2521058972449595 F F F  
0.3686351401988546 0.9343336261241078 0.9556323810830705 F F F  
0.5225608732794029 0.8696439656629806 0.4416546251212168 F F F  
0.4715907106788819 0.4447373687326106 0.6754618858960484 F F F  
0.4345625515980558 0.3478994264943793 0.1637185320870174 F F F  
0.9731333859810363 0.8539581943557124 0.0354622601259891 F F F  
0.9226996202061457 0.9474715284785660 0.5304751705618997 F F F  
0.9246316976955242 0.3517651375426567 0.5302611192587818 F F F  
0.9699397088722463 0.4490374749266834 0.0349970704126719 F F F  
0.4194235913558657 0.9504414556353282 0.1719284432195991 F F F  
0.4731775480387910 0.8415631551976901 0.6561176243895801 F F F  
0.3190813711400438 0.4565400585950243 0.6479107942487161 F F F  
0.5856743386968120 0.3489373869611327 0.1501388121966585 F F F  
0.8208857126201252 0.8523685516117823 0.0440930052236155 F F F  
0.0772558087671129 0.9502682129015625 0.5471315815689053 F F F  
0.0809770991239915 0.3513852048267054 0.5468047936199270 F F F  
0.8162261061117491 0.4509674977930302 0.0476013112468152 F F F  
0.5742640720870895 0.9534071147046674 0.1495691338475140 F F F  
0.3213600820177547 0.8559035642485355 0.6582563021109920 F F F  
0.2661104029482217 0.4313656255325782 0.4277762879479496 F F F  
0.6298695034329214 0.3688288641391608 0.9305642834871648 F F F  
0.7707509661659557 0.8625804243224451 0.2633080368867056 F F F  
0.1294000372775201 0.9370362802484351 0.7715517935010183 F F F  
0.1244649953731738 0.3655454381798151 0.7747960412066632 F F F  
0.7674159655734485 0.4361688927860001 0.2682422270694715 F F F  
0.6240775598994475 0.9369735196861129 0.9230461761032771 F F F  
0.2682676382568374 0.8652255906010566 0.4424007002047503 F F F  
0.4046474639910187 0.4673228566203136 0.3231095970360300 F F F  
0.4966571764576102 0.3193914072595661 0.8250654221456344 F F F  
0.9013237298585679 0.8246651635516500 0.3750294738289313 F F F  
0.9978212274403973 0.9759687415571463 0.8783948935320680 F F F  
0.9949398489278281 0.3246322294178938 0.8822406421761784 F F F  
0.8995733715316874 0.4744539722576917 0.3767819970591688 F F F  
0.4910608581130234 0.9596448274008580 0.8175807511803583 F F F  
0.3971994564154500 0.8273634825983365 0.3246373787324330 F F F  
0.6252452835931877 0.2275458783618873 0.2891202961887913 F F F  
0.1167163113869307 0.0723864209241611 0.4075348334594224 F F F  
0.7771961205909506 0.7301040579229934 0.9126665188071925 F F F  
0.7744292984068579 0.5739575891046442 0.9164214234521708 F F F  
0.1256537403348688 0.2270472529349874 0.4146504647715759 F F F  
0.2719820484898747 0.7301015640539745 0.7915677182830976 F F F  
0.6185650020367888 0.0713938492656396 0.2925003163215010 F F F  
0.5185114790386578 0.2720986188215520 0.4488962305870317 F F F  
0.3768049864594971 0.5189359764441619 0.9527253044838702 F F F  
0.0142445589222646 0.0215286758482875 0.2566991616482284 F F F  
0.8753962890420794 0.7794838575845873 0.7588242552292073 F F F  
0.8730823764979476 0.5229585619344093 0.7613520277713164 F F F  
0.0247718204279082 0.2779011826683160 0.2623753606286598 F F F  
0.3656525671755375 0.7779980163294695 0.9477972254146465 F F F  
0.5144668843795372 0.0251795596367046 0.4422691132520100 F F F  
0.4831695489593031 0.2194325781165603 0.6574864154719222 F F F  
0.4145732477686721 0.5689737076452630 0.1545201628230544 F F F  
0.9722929324260932 0.0715778787114445 0.0543861392586606 F F F  
0.9144609342339152 0.7271468915389434 0.5534998956405843 F F F  
0.9124810570681348 0.5736614162516247 0.5541365302699788 F F F  
0.9746026683461864 0.2282761043703019 0.0611168036861471 F F F  
0.4119658797128096 0.72626141666043164 0.1517817656586971 F F F  
0.4665575639461110 0.0650388279260881 0.6473188859955812 F F F  
0.3252130495717154 0.2375937427105370 0.6335314677801236 F F F  
0.5720890159392908 0.5699112624258689 0.1435063759253836 F F F  
0.8146808196235540 0.0736782236415010 0.0674593697933759 F F F  
0.0731986815609602 0.7274927181091186 0.5656853915318862 F F F  
0.0718195912649691 0.5715910831509419 0.5652678535230606 F F F  
0.8176459937329597 0.2316256217175479 0.0687391894901737 F F F  
0.5706267647064536 0.7277124041856453 0.1383194990801115 F F F  
0.3117007196962192 0.0821410458938132 0.6307830048777063 F F F  
0.2701006591072215 0.2787483027076831 0.4212886894589971 F F F  
0.6262880486256535 0.5265130398742812 0.9349060344389315 F F F  
0.7667971740932344 0.0207874350158477 0.2785212125029872 F F F  
0.1230034292022566 0.7778069589606176 0.7758532594016074 F F F  
0.1194863955771481 0.5230390792607338 0.7755159175073842 F F F  
0.7703920161124742 0.2788106319489856 0.2778432981916055 F F F  
0.6250554917650817 0.7754260461017424 0.9282434339064807 F F F  
0.2635385571133639 0.0246797388718250 0.4246806376932497 F F F  
0.4005915265710840 0.2299967428630296 0.3106527116189639 F F F  
0.4939986925184456 0.5686356123569496 0.8298890529660454 F F F  
0.8955647677597298 0.0718210779643158 0.3903824595633267 F F F  
0.9942741946553824 0.7287823028451967 0.8933617690549553 F F F  
0.9918062255474922 0.5750179560235082 0.8928030759647001 F F F  
0.9023623936665714 0.2270603053179485 0.3906227948643064 F F F  
0.3948885633446650 0.0748340943082795 0.3127283328330108 F F F

Structure 12 S=-10/2

1.0000000000000000  
20.1473052208877697 0.0000000000000000 0.0000000000000000  
0.0000000000000000 19.7681594983396742 0.0000000000000000  
0.0000000000000000 0.0000000000000000 13.2309279702280254  
Al C Fe H O Si  
2 1 2 10 198 94  
Direct  
0.2733073500081003 0.5724371719675133 0.7902230680989319  
0.4916780507899192 0.7275227034779200 0.8070609085890011

0.5058071059681838 0.6675376426824492 0.4402673747377760  
0.3282834154031500 0.6233483840645239 0.5914344600472708  
0.4718564218713842 0.6740757568517858 0.5873718361273034  
0.4316640191536156 0.5615455240644989 0.5267486067851451  
0.1958256938381598 0.6622429844206563 0.5820703708717310  
0.2345470878484532 0.6584843484659727 0.4782485110533252  
0.5953229005840055 0.6677657580737715 0.6952008414916844  
0.6116501788247828 0.6847930857506106 0.5822938121603536  
0.2438489046382404 0.5663257314686454 0.3748842295062544  
0.5321708421034856 0.6190239217328112 0.4340865157694928  
0.5382021637623061 0.7093601220141583 0.4173524903134834  
0.3656251810403695 0.7389549772621761 0.5140506531878987  
0.4608646721431134 0.6669917791484498 0.3932124454073366  
0.7034395301140121 0.4733680691398284 0.3145850572450686  
0.1948247182764440 0.3309336884714684 0.8146298400913194  
0.2058521728699887 0.8245049597554678 0.3956214365630167  
0.6916457402681264 0.9739490787434941 0.8894408529316198  
0.6938583731944894 0.3291809249053953 0.8844100948761127  
0.2062759042694451 0.4820087474135235 0.3933183619715346  
0.1974571518045095 0.9729271755470418 0.8062479805407599  
0.7052997646101673 0.8239623601432764 0.3062055960518804  
0.5899648023801174 0.4624824995592245 0.4149684597777628  
0.3076081118656884 0.3409059010672522 0.9121606943540244  
0.0955234292792208 0.8352305787524668 0.2895945971638761  
0.8068596231610493 0.9717909113704258 0.7903026268515966  
0.807730582115817 0.3332794609173461 0.7903641020370580  
0.0946438251284995 0.4668002591892320 0.2909056611595252  
0.3109304634856420 0.9822358667237755 0.9084988510797362  
0.5942423596934815 0.8393372571435157 0.4053430868900493  
0.5970905812457460 0.5387594605966575 0.2510437692788459  
0.3019724844377354 0.2747144545586492 0.7368972012009315  
0.0977507953598714 0.7582962876819507 0.4546776363125480  
0.7922104714772081 0.0446629750012565 0.9574780434970881  
0.7986096564618382 0.2624698836946269 0.9598622558457238  
0.0960554755346291 0.5430399045957330 0.4562329798290630  
0.2920606382403482 0.0555989846288031 0.7442235981028668  
0.5957326265948458 0.7618435717506549 0.2425957713576342  
0.6026211619363294 0.4034774159753455 0.2379599611771289  
0.2897177787881985 0.4100965155672030 0.7426743793968643  
0.1043776299725025 0.8929866766050937 0.4694654932004442  
0.7969954505510927 0.9097479120413607 0.9643712361806143  
0.7940834548534236 0.3971069361262172 0.9655749817025536  
0.1077503799188142 0.4087166997916351 0.4710555765880152  
0.3101902114303852 0.9239941678580229 0.7280533308589646  
0.6083867511471113 0.8959301107223449 0.2238456228076436  
0.5226142844006454 0.4482777077805357 0.5828244088678604  
0.3806559029575597 0.3540734686645710 0.0764157701943748  
0.0219984763634616 0.8598652079718740 0.1291826700439198  
0.8725616855195089 0.9388472457281034 0.6261498701836707  
0.8779390466699358 0.3618557495136763 0.6284047343945444  
0.0225532854504181 0.4402939458101299 0.1292601288781891  
0.3685131046619821 0.9427231969953963 0.0785999156032298  
0.5213898012815242 0.8644823634077947 0.5652955740874934  
0.5118781859755438 0.3537879002218116 0.4381268662014450  
0.3968635144665698 0.4412510733222470 0.9237833524916572  
0.0142436434461962 0.9419845934445576 0.2896885287313711  
0.8789986586639910 0.8582705112581842 0.7881692419853998  
0.8843458962368052 0.4428799963592455 0.790776695072052  
0.0192511452324711 0.3565874650160545 0.2895354090820965  
0.3485015029941449 0.8561309795668726 0.9266234631108858  
0.5140006234789820 0.9464490028008263 0.4030347414913344  
0.4576679552243004 0.4749566353762003 0.4152004670167486  
0.4358639784828443 0.3146534376027315 0.9028759000952635  
0.9658112458195534 0.8191211077137470 0.3022952170533811  
0.9398112616203663 0.9755097755905286 0.7902144070420831  
0.9388080619171110 0.3222922955678275 0.7959931406662271  
0.9638461901004706 0.4772091922627930 0.3004276134750054  
0.4410427236283907 0.9520175033967144 0.9156226822546506  
0.4641810899620508 0.8239481474397332 0.3951103710745113  
0.4816010464830567 0.5080580991109597 0.7490543127515540  
0.4291701353885867 0.2760349094890840 0.2204934601923680  
0.9804895589598540 0.7783362516092843 0.9858192804615582  
0.9119722400759188 0.0207733817084325 0.4819504220917399  
0.9141795450085076 0.2745824054095732 0.4887243696974004  
0.9819363382168899 0.5239461514198902 0.9866968766881604  
0.4088124360941988 0.0262289075463465 0.2186453262930900  
0.4827084003965336 0.7623930543587627 0.6819011314732677  
0.3953803906595060 0.4401530792463905 0.6303220778813409  
0.5099222558811304 0.3540570498612988 0.1155982674509459  
0.8953157143693284 0.8619508917694008 0.0772630094978577  
0.9979058108840666 0.9349639140348563 0.5684489649004753  
0.0030838451119266 0.3600687297851811 0.5670958261265349  
0.8959286559548270 0.4399599194203049 0.0766352117248410  
0.4944670342501048 0.9363363750321406 0.1417821205104088  
0.3948992783064056 0.8568054540290775 0.6170407594633081  
0.4841107360129546 0.3753400563374619 0.7383493692124729  
0.4282193201365460 0.4095999324212958 0.2458917154802390  
0.9864726965606113 0.9100276066592358 0.9514582231939922  
0.9027251760082418 0.8892361276284090 0.4461748397126470  
0.9070326595411874 0.4054518877367334 0.4462540517393092  
0.9879439590005836 0.3917513133386777 0.9515809083559374  
0.3950444833841887 0.8956112820279146 0.2596597187030120

0.4865061254508327 0.8851612439324346 0.7562579090066200  
0.3034926876412327 0.5346184150506320 0.6754369901017356  
0.6034182159748630 0.2737645573338710 0.1934097480504726  
0.8101131532246960 0.7769891993817857 0.9937555640228363  
0.0845609965759549 0.0241351227782979 0.4982543046112522  
0.0971229167929016 0.2759519377536033 0.5016669346227667  
0.8081530043515976 0.5275898453258508 0.0053312138830669  
0.5830006456990289 0.0267920797970270 0.2036453531615703  
0.3039546949126981 0.7893290847296309 0.7239094813023518  
0.2753852971163248 0.4348604011063944 0.5489044508087838  
0.6336336006015683 0.3640215568980053 0.0529604032964098  
0.7698061632772873 0.8583903938817490 0.1405843937401428  
0.1192860231960819 0.9442602682219600 0.6497042148217828  
0.1227137284865139 0.3583660456868949 0.6526433665655716  
0.7721913455136746 0.4413602953576359 0.1491295318734935  
0.6098500471226317 0.9507357082765014 0.0440462827727155  
0.2673159817379254 0.8602455028756595 0.5654460092391149  
0.3321861958182010 0.4464620270420807 0.3675995650382666  
0.5644111476060573 0.3356231873264292 0.8878343465564643  
0.8351188886027542 0.8229978700407462 0.3048267741210439  
0.0691422320862730 0.9723314894328924 0.8283516455159524  
0.0673863704639636 0.3238816135635987 0.8271755260769138  
0.8331334351365329 0.4751721569729966 0.3171315767208943  
0.5653815140493186 0.9672341628438355 0.8578374750317475  
0.3346882342992174 0.8254035397341726 0.4037949774084846  
0.2423615165360670 0.3533577591441157 0.3981662003790863  
0.6337649405064235 0.4492944931394851 0.8967188789225743  
0.7723718600566650 0.9403003510813200 0.3012406309765622  
0.1346243134205214 0.8563302309895119 0.8016566917383046  
0.1236175854100992 0.4445048423189029 0.8076759431193523  
0.7693204132875505 0.3578261341897394 0.3086231394195091  
0.6332873503941350 0.8553522932110360 0.9042630967593347  
0.2686925335318157 0.9432833423006890 0.4070535095706960  
0.3972402893175118 0.5401552780901376 0.2689925877969868  
0.5070155359164692 0.2471932830541468 0.7687232925994396  
0.8984175780459874 0.7539478855913267 0.4404715613459166  
0.9901901136265295 0.0451810202220185 0.9401854347482148  
0.9904983552781584 0.2562786626784212 0.9484543780191155  
0.9036281840469542 0.5414518327772226 0.4469723311300320  
0.4686839496448544 0.0200600655396031 0.7513463058645867  
0.3948483192243768 0.7589085903270701 0.2607101388968677  
0.7045184144734932 0.2411239840348187 0.3161629684023727  
0.1891963088911168 0.5627989828873907 0.8039708927388939  
0.1934656196697219 0.0530578783224172 0.3894260637934452  
0.6959784445931498 0.7379130284432115 0.9062690626668810  
0.6946471294063026 0.5674041076569749 0.9169867968484327  
0.2077430080310594 0.2267341926412164 0.4130272150132707  
0.1917667791743345 0.7343657490206918 0.7919102217295231  
0.6949075907328026 0.0479562768293425 0.3089251272588480  
0.5834754668501531 0.2464620244120761 0.3893227279594871  
0.3151279655251862 0.5460171076144742 0.8954779019421365  
0.0789365445965102 0.0585016154889814 0.3021626069429367  
0.8052478245650452 0.7470227147178014 0.7979411447615903  
0.8009107802375945 0.5476016143962777 0.8058747205771430  
0.0971467686066800 0.2480644298851408 0.3055956069296894  
0.2999598519313051 0.7340129201394108 0.9056300881256615  
0.5812460510107171 0.0616788496533474 0.3998273898460866  
0.6153870714281403 0.1499237551346025 0.2576543958483662  
0.2936228363053502 0.6550809763377690 0.7433573397764019  
0.1052922540282212 0.1489603182020883 0.4438653553079859  
0.7950872252524448 0.6511679353537044 0.9374367982956249  
0.5282371254549326 0.2522473342444163 0.5692333383502787  
0.3730562251738603 0.5261629918558614 0.0741843728959534  
0.0162068267238136 0.0259273267653899 0.1336784766285503  
0.8766095538476920 0.7728335404654476 0.6349788769113898  
0.8744645281253998 0.5289547444894073 0.6405654030698811  
0.0233803354013511 0.2677083141286334 0.1409255513985562  
0.3702627178249577 0.7661670552658422 0.0672758041392320  
0.5127801567020329 0.0249491980220002 0.5637948482883487  
0.4513413751524630 0.2366137304837053 0.4090978564412064  
0.4453153918556997 0.5654854787296620 0.9200854587268869  
0.9473695071877981 0.0577299672345760 0.2966331560295337  
0.9375610662797513 0.7385259448987179 0.8046814057099929  
0.9303168920074222 0.5675435654624812 0.8127699034136977  
0.9656477779561757 0.2351709956846802 0.3134682148574568  
0.4313701605528751 0.7538229309034405 0.8891328957945691  
0.4498267279665557 0.0640703159042660 0.4002390189668462  
0.4981340697210243 0.1376984628314472 0.6649955820959271  
0.3901269606562098 0.6477601915546212 0.1544035704374371  
0.9939285958708014 0.1489518539483633 0.0645246670741250  
0.8895952533129192 0.6493457392714813 0.5615857322083240  
0.4068569898075409 0.2342783505752631 0.6365706452710586  
0.4927139159134221 0.5635561637128503 0.1364399412888962  
0.8952873671488883 0.0600446555580323 0.0784472330956052  
0.9943522529690393 0.7302126167589179 0.5730439169479127  
0.9951857453587710 0.5695243644962603 0.5832283292982210  
0.8983008424643424 0.2412322313251490 0.0898083064857525  
0.4913593715466739 0.7329586404513860 0.1285324008771903  
0.3911423379712345 0.0688078368035827 0.6094423937959562  
0.2957404816179367 0.1615685134247093 0.6265172711591522  
0.5948681214606077 0.6487180896271187 0.1374256084885336  
0.7989050221558426 0.1526374983535547 0.0734601632897813

0.1008163754173790 0.6505359513789740 0.5742370386155945  
0.3012684943210989 0.2794739348680259 0.5369371124318045  
0.6056647748046963 0.5273592742554221 0.0522703102826393  
0.7786147306867709 0.0324669168669048 0.1564890005721116  
0.1060811663633317 0.7738237970242435 0.6526802287762519  
0.1105484680833343 0.5267419794805697 0.6526654083310726  
0.7792451365332265 0.2724254800708407 0.1568901759580945  
0.6050393630905960 0.7669572583252258 0.0437652260705898  
0.2713061667755320 0.0397628791632465 0.5475549732025721  
0.3273816821827344 0.2561070623741579 0.3437985931625728  
0.5711686079715214 0.5670489491018306 0.8647049492133636  
0.8211548935460988 0.0608738768313910 0.3451549843935905  
0.0662283982051685 0.7444036436158126 0.8405494084421483  
0.0599641183761259 0.5597303594273461 0.8315581181270754  
0.8346597663463348 0.2424816095242513 0.3342837019934608  
0.5718062848258900 0.7409778419788232 0.8494066737528529  
0.3213847325770094 0.0620088384507482 0.3622330842835391  
0.3976783209919881 0.1529595446856187 0.2742504097455196  
0.4837761393575806 0.6427534499258564 0.7661306895730406  
0.9029672999041136 0.1480840322640813 0.4301729516088718  
0.9929246666073840 0.6518625887904352 0.9332570373424939  
0.4240583137717202 0.5868400201992873 0.5894475805771247  
0.3785651334861249 0.7082636463075775 0.5683749126771630  
0.2383552534204556 0.6738844437963374 0.5501153411390325  
0.5821843562860174 0.6583528377722755 0.6252859999166887  
0.2693666708065225 0.6083482958110302 0.3892499715572443  
0.3174541835787505 0.5831253796223922 0.4606932249368908  
0.6233768950308132 0.4695207591158311 0.3033535146731712  
0.2740645515403445 0.3389804550049730 0.8004563297916835  
0.1256706294915099 0.8277380905182951 0.4031665348475179  
0.7713836963179731 0.9748352580270302 0.9009491329040394  
0.7734686502826768 0.3302668251701336 0.9015511865857391  
0.1251768249129327 0.4745192306657977 0.4039409234916660  
0.2768960604407337 0.9829631531257784 0.7970425551173983  
0.6256170521332075 0.8302754096820361 0.2924008249701210  
0.5210559506568621 0.4337423117590341 0.4624778614883039  
0.3802525098454405 0.3634744049363628 0.9542362292800438  
0.0241336228424761 0.8642645380003408 0.2511978779045738  
0.8744231651259007 0.9362246650465694 0.7485238649170390  
0.8772434207839903 0.3652408144777274 0.7505585869150027  
0.0246515477098892 0.4347251301936731 0.2511346001792333  
0.3674364740496442 0.9328489544074751 0.9571030981145073  
0.5233330598302821 0.8692288053065313 0.4432031467994206  
0.4703745712795079 0.4442652903565338 0.6765981538527891  
0.4360987522797763 0.3486900020186065 0.164992256459515  
0.9708440043900708 0.8526124211147945 0.0349677105519939  
0.9217600309893507 0.9459482321130335 0.5296241645343260  
0.9261792620735753 0.3503480913289493 0.5318992645423626  
0.9716722899613925 0.4492802695364129 0.0347770768496762  
0.4176839416643458 0.9502327681885425 0.1746088518489988  
0.4706460778499741 0.8420344577373908 0.6549222860369861  
0.3170774605839596 0.4550224572528506 0.6489701052179256  
0.5872533496960090 0.3487885722885874 0.1500692394819886  
0.8182070747914241 0.8515305163929107 0.0433288260872703  
0.0761703658068201 0.9492782548528542 0.5469675929814887  
0.0822600415106464 0.3504192588440575 0.5480910415696467  
0.8178462331862679 0.4514806902682078 0.0493586949501403  
0.5733883645238558 0.9524479553599564 0.1527475797164110  
0.3189332664274214 0.8567899446915047 0.6598361175652186  
0.2655370578407911 0.4294550239661076 0.4282989717396258  
0.6309008702827659 0.3702023173873432 0.9304323786853992  
0.7706028312773532 0.8622739888533595 0.2630715548957626  
0.1298873596799442 0.9358683160837272 0.7706203982576959  
0.1269073999834859 0.3656821021912168 0.7748409828665754  
0.7695007480067657 0.4362260816698440 0.2716329480413700  
0.6246226146591094 0.9354256968328336 0.9255280096138077  
0.2688094221389678 0.8647588689978422 0.4428792206029092  
0.4037103607799478 0.4675277940018001 0.3238602420704874  
0.4979274975764624 0.3194925535907286 0.8250698832272736  
0.9007727627373729 0.8228170783767785 0.3742883628764929  
0.9961818959165886 0.9747717264537751 0.8779608517541861  
0.9961393707094061 0.3247596208752244 0.8820791984409480  
0.9020248526732403 0.4736262539576011 0.3787452855396339  
0.4902730301377060 0.9557561065557549 0.8192938300226849  
0.3974072526408668 0.8273207621801857 0.3268105424812789  
0.6266411213844704 0.2283354640839101 0.2894474126010634  
0.116212222748524 0.0709158250757835 0.4094583783237257  
0.7752878642242744 0.7286396746249195 0.9095059357467614  
0.7744918510453925 0.5731008585702692 0.9164777156183441  
0.1269854656649079 0.2257152363631507 0.4156408433666814  
0.2723086922141604 0.7285427260242066 0.7903398691482271  
0.6189197947528705 0.0712574544482968 0.2915885192861167  
0.5189378831036218 0.2723528963244947 0.4510459393303023  
0.3803384003312525 0.5203771730675252 0.9513674437230487  
0.0143183201217719 0.0210274063458861 0.2561104236734187  
0.8746192687161036 0.7789523824829836 0.7573993803911161  
0.8722218336104867 0.5218674052631755 0.7628329189553442  
0.0266759487105813 0.2766427942145707 0.2627314602199743  
0.3649257246722738 0.7763212164152975 0.9455106227284622  
0.5148031383366879 0.0246917306890818 0.4413257390604246  
0.4844301392073978 0.2181888124423165 0.6594761217877472  
0.4137468948105412 0.5697949960617994 0.1574599040099711

0.9733276574631937 0.0704802063070426 0.0534438279404151  
0.9150950160997265 0.7266056410097502 0.5524013738856389  
0.9162157451449620 0.5722126349592715 0.5580563451733394  
0.9758133496365260 0.2283858361488339 0.0608253756582666  
0.4125689845870761 0.7260921543089375 0.1516742513154710  
0.4674308561574039 0.0631546599599960 0.6480306914850069  
0.3267260774038087 0.2372408977886716 0.6349684649293869  
0.5722526310364624 0.5701251126369468 0.1440358155168913  
0.8163669060941404 0.0728286660870179 0.0663726131326245  
0.0739100491135546 0.7287202701061108 0.5632075064265870  
0.0746275243163502 0.5718101442982346 0.5670746095496335  
0.8192228831102648 0.2318667325562251 0.0692524782901130  
0.5713321844185658 0.7273214167186260 0.1372596083208068  
0.3129820893773587 0.0814619796195481 0.6323483780206167  
0.2703293371446002 0.2778652721287685 0.4234294829173852  
0.6254310065008534 0.5275167026660309 0.9328939297233584  
0.7673364320748064 0.0205606853186859 0.2769837170646864  
0.1246404926205587 0.7772222521680178 0.7727322726225930  
0.1226143915303904 0.5241316801782780 0.7759602811290955  
0.7721649417021547 0.2782103321982805 0.2792623263120670  
0.6245231471458510 0.7744874471624568 0.9244964069676688  
0.2643358313464195 0.0243405363568288 0.4271578530624413  
0.4012214572916786 0.2306644540279000 0.3127819698562595  
0.4948939856107437 0.5712148943093254 0.8234466387009874  
0.8956832571917656 0.0711946313669452 0.3887716150515089  
0.9944439610541829 0.2788110392768538 0.8908479479856826  
0.9919534966785055 0.5746335735528360 0.8914396981828721  
0.9039463888855495 0.2259186657206947 0.3913732756422535  
0.3940109312326859 0.0754785088837065 0.3136565196023616

Structure TS reaction CH4/11 S=10/2

1.0000000000000000  
20.1473052208878016 0.0000000000000000 0.0000000000000000  
0.0000000000000000 19.7681594983396991 0.0000000000000000  
0.0000000000000000 0.0000000000000000 13.2309279702280005

Al C Fe H O Si

2 1 2 10 198 94

Selective Dynamics

Direct

0.2731050548813028 0.5728095311874892 0.7860249724719101 F F F  
0.4936243523400467 0.7283104024884490 0.8121270393807724 F F F  
0.4840927629784099 0.6674587439046860 0.4327283154213451 T T T  
0.3302408204294292 0.6238286493846720 0.5872162476568659 T T T  
0.4680771763856956 0.6667156030808312 0.6089510246220862 T T T  
0.4330087840266382 0.5570588417739273 0.5271153904826131 T T T  
0.1969277287350243 0.6581799961674146 0.5756687454245384 T T T  
0.2382217022868851 0.6574647065105571 0.4732581939279137 T T T  
0.5945215102543675 0.6628971311399127 0.6796800589714647 T T T  
0.6036958087714134 0.6829180464272733 0.5656943692027924 T T T  
0.2488378144473857 0.5668795053603989 0.3710746452313518 T T T  
0.5140985303519608 0.6215011420196063 0.4421612884764002 T T T  
0.5151567612827530 0.7104229377594465 0.4110490289418378 T T T  
0.4254544231562628 0.6905726239979895 0.4882105228253615 T T T  
0.4475253446135635 0.6569251175153494 0.3729657611597269 T T T  
0.7024960378394794 0.4752504548595191 0.3119264857887296 T T T  
0.1936871269665483 0.3307163357137924 0.8136131355454488 T T T  
0.2055594270695440 0.8227339964532200 0.3974281703427319 F F F  
0.6928931285553657 0.9717656642165257 0.8853197061168683 F F F  
0.6932971113275364 0.3289300586830871 0.8836394708837114 F F F  
0.2067847433571751 0.4823672452361217 0.3921497264960007 F F F  
0.1990564485972543 0.9699949665901274 0.8070528245970983 F F F  
0.7051405959537770 0.8227857438756397 0.3030188843007398 F F F  
0.5901465009411397 0.4625669276639402 0.4149791093355346 F F F  
0.3065171511825374 0.3409852988801394 0.9107159192766647 F F F  
0.0951681008384383 0.8346581839167186 0.2916050246124676 F F F  
0.8092147151799997 0.9731656995678988 0.7912678401532210 F F F  
0.8070636025114615 0.3331306689819934 0.7889051391307762 F F F  
0.0944464333861695 0.4667545966165867 0.2906659908286914 F F F  
0.3129397705305433 0.9831215710256066 0.9058143994876106 F F F  
0.5951229116354338 0.8405520083990325 0.4033518164755802 F F F  
0.5937829552511202 0.5387484871316414 0.2513053165672698 F F F  
0.3010318320279090 0.2753641217483033 0.7351976558588991 F F F  
0.0968990729761448 0.7574829886251345 0.4562294814110679 F F F  
0.7908706604280158 0.0442824890015573 0.9590227212672338 F F F  
0.7984176543950302 0.2625834753319728 0.9590660256548099 F F F  
0.0970790784563334 0.5429175363284213 0.4561658626210907 F F F  
0.2906314207324587 0.0548868024753758 0.7416805821178211 F F F  
0.5943531718852280 0.7609872396585715 0.2441118850580196 F F F  
0.6020770755662623 0.4036520879272708 0.2374436240126341 F F F  
0.2877746506532706 0.4105586780759689 0.7412995112969027 F F F  
0.1046019792083164 0.8920541212928750 0.4714730586782185 F F F  
0.7979674151699776 0.9093556674495400 0.9640031918145049 F F F  
0.7935380214929054 0.3973305888390256 0.9630454968108675 F F F  
0.1089610633327906 0.4086304826387847 0.4704652100756679 F F F  
0.3121390270395949 0.9231040897306602 0.7269751892035642 F F F  
0.6086313062778873 0.8947745268422344 0.2194885498812978 F F F  
0.5224962532554351 0.4484884027930300 0.5823591570593111 F F F  
0.3801067371329495 0.3551046593156318 0.0748532565430420 F F F  
0.0238869396320150 0.8608122308791579 0.1296850365076548 F F F  
0.8736065826464605 0.9385317509602573 0.6266674439300893 F F F  
0.8774215870915792 0.3627981914080192 0.6277395295760646 F F F  
0.0207749414696545 0.4413763876976620 0.1301905731752607 F F F

0.3693347352152677 0.9447775578126850 0.0764645720253304 F F F  
0.5233193977907389 0.8604289685375748 0.5636287031033436 F F F  
0.5115084040788669 0.3542649745642419 0.4363165109688995 F F F  
0.3950077998956389 0.4416622162798848 0.9212734797384259 F F F  
0.0152651408641361 0.9425495764690353 0.2906247187722797 F F F  
0.8793067163395992 0.8587025381758904 0.7896992221587213 F F F  
0.8829113162964244 0.4436190313058241 0.7900425725667432 F F F  
0.0172974092402001 0.3575898200138064 0.2901331631773693 F F F  
0.3492562690715741 0.8565020462185626 0.9263822341965059 F F F  
0.5133620212628783 0.9461302294357798 0.4039160893474719 F F F  
0.4577935162832661 0.4752950653465816 0.4145972709079831 F F F  
0.4348154589438473 0.3151710253130680 0.9012546913533001 F F F  
0.9650074720589162 0.8203662998395115 0.3006356030896629 F F F  
0.9421608923288505 0.9750308477436054 0.7892343020917262 F F F  
0.9381697859950655 0.3233552727321969 0.7956560193919869 F F F  
0.9639533235635394 0.4790955304260257 0.3028981031172565 F F F  
0.4426813769690247 0.9511431673280694 0.9141798394566493 F F F  
0.4649883653573107 0.8238109559785088 0.3918542548632552 F F F  
0.4830940661787868 0.5073339912735808 0.7503245796744495 F F F  
0.4278110355228564 0.2755006550262606 0.2175931073314176 F F F  
0.9823785974289334 0.7789168697106360 0.9867031268799761 F F F  
0.9125253694224303 0.0226858372250121 0.4847399917434912 F F F  
0.9134096914877307 0.2756849584324766 0.4879924272985406 F F F  
0.9792234044165274 0.5241518118404815 0.9869742002884113 F F F  
0.4112876427410664 0.0256235449335844 0.2184876851965524 F F F  
0.4833425348935771 0.7627783805351341 0.6879485028662807 F F F  
0.3956651380422738 0.4375426232160428 0.6331121716508246 F F F  
0.5093072231978679 0.3544160839761303 0.1144443562300296 F F F  
0.8974603163827422 0.8637398329133095 0.0771946479277107 F F F  
0.9988983369431021 0.9366558633720632 0.5689113359195541 F F F  
0.002179600089296 0.3622246780378672 0.5641474615273557 F F F  
0.8942169203627530 0.4394993565910469 0.0770754687239353 F F F  
0.4958944052094232 0.9373994972822529 0.1362080363482077 F F F  
0.3973322469133041 0.8573466738371641 0.6153488019699147 F F F  
0.4869488948426027 0.3753968678066735 0.7387702679231595 F F F  
0.4280100439351965 0.4087527745667036 0.2457950649592957 F F F  
0.9889517184391541 0.9102802090782374 0.9509744936751606 F F F  
0.9040159466672545 0.8915562231115337 0.4454003872867819 F F F  
0.9045642367516362 0.4065155300923894 0.4453417308255569 F F F  
0.9868198791614490 0.3920237830264381 0.9524632851849547 F F F  
0.3979342481145676 0.8938157291461812 0.2536262242617672 F F F  
0.4894469448717506 0.8878076022983892 0.7526860359682217 F F F  
0.3045648761395461 0.5344156923345988 0.6730850361282045 F F F  
0.6015553921338573 0.2737297539705696 0.1938142517740130 F F F  
0.8134625750925029 0.7770652484365294 0.9958160230312709 F F F  
0.0869203997627706 0.0239716503383511 0.4967185846108046 F F F  
0.0959145481799191 0.2765049878981752 0.5019284339043852 F F F  
0.8068858202137273 0.5274215003434002 0.0051208527719433 F F F  
0.5836942173929222 0.0261108299607800 0.2047579356570236 F F F  
0.3077379924629931 0.7882597571936450 0.7199039031734239 F F F  
0.2770105401405233 0.4346397671026054 0.5467411840022465 F F F  
0.6334838638453848 0.3633077964819847 0.0531398385474378 F F F  
0.7719432112440032 0.8594887794489174 0.1409146826379552 F F F  
0.1199073204742659 0.9452671994761945 0.6505290879576345 F F F  
0.1206768856735450 0.3591515174173517 0.6530373135403523 F F F  
0.7694203998586079 0.4400328297791073 0.1463276429027263 F F F  
0.6121005242011859 0.9538564619486254 0.0422258933116407 F F F  
0.2688958821852783 0.8615516188522997 0.5639018380177121 F F F  
0.3322059548179395 0.4487074831862010 0.3649081001566069 F F F  
0.5639720880381991 0.3327801242643165 0.8895496453113670 F F F  
0.8345651090041322 0.8242277359343616 0.3076092940372555 F F F  
0.0711007248925827 0.9749270752123750 0.8298316152320340 F F F  
0.0664407245040871 0.3243358414999261 0.8282313696300253 F F F  
0.8328341278571080 0.4737947967908093 0.3110136980948354 F F F  
0.5662306391711104 0.9708883030279675 0.8560376001974067 F F F  
0.3343743735363356 0.8300419847631396 0.3983162117875657 F F F  
0.2437141486468213 0.3538810737095987 0.3951767858808260 F F F  
0.6312052402588377 0.4481892101495483 0.8966124751460051 F F F  
0.7697953634289262 0.9405450677212630 0.3023587823701375 F F F  
0.1314439745723197 0.8562800813385021 0.8023357585538367 F F F  
0.1234070164735565 0.4447972130011130 0.8087652225941203 F F F  
0.7655120749512384 0.3581387997284665 0.3078208222866760 F F F  
0.6283590680578222 0.8562795867059153 0.9037109593574075 F F F  
0.2634318733904482 0.9438810886233457 0.4052265571407340 F F F  
0.4004205566358167 0.5402405986940506 0.2660566077320872 F F F  
0.5054935413412663 0.2464551296364818 0.7680173731486694 F F F  
0.8996211751095278 0.7560705676333898 0.4417941488957915 F F F  
0.9892511784264900 0.0455815840369587 0.9406553783194047 F F F  
0.9886226690505761 0.2566098515038777 0.9482839201678256 F F F  
0.8973561042940112 0.5425305024262024 0.4444554986979832 F F F  
0.4673467199134616 0.0223916938599379 0.7521169747803852 F F F  
0.3945044973687610 0.7573973411856955 0.2611244138403019 F F F  
0.7036534190232067 0.2398991813022259 0.3138915409712809 F F F  
0.1888568613396321 0.5634092528053185 0.7944145340542236 F F F  
0.1942079593780166 0.0572418945131011 0.3863639498394014 F F F  
0.6983117360987705 0.7429748922968737 0.9078484547978296 F F F  
0.6946024088581859 0.5656529424622531 0.9115723501260877 F F F  
0.2064028536799620 0.2280690860919181 0.4116387403870747 F F F  
0.1941852571273648 0.7368837196087661 0.7905263160660857 F F F  
0.6951854458389171 0.0504217705626553 0.3093244414209708 F F F  
0.5835500753247345 0.2467798587907163 0.3902113928383786 F F F  
0.3122948706529323 0.5460460003502945 0.8937797308995481 F F F



0.0788252499220828 0.0595930691079189 0.3011970053160604 F F F  
0.8080677781248223 0.7457565475400294 0.8005164273051379 F F F  
0.8033151327531978 0.5509631228468559 0.8059633674421570 F F F  
0.0955567768544949 0.2492881724545688 0.3054576073559826 F F F  
0.3021763869862156 0.7341135771334615 0.9029550456138649 F F F  
0.5815732419174081 0.0607857633267379 0.4011104286963406 F F F  
0.6128171172988160 0.1498160826685274 0.2580280419991852 F F F  
0.2948983635865569 0.6553408081256560 0.7406701096178350 F F F  
0.1040588624433559 0.1498943047164012 0.4434448456458853 F F F  
0.7928322327012705 0.6515739607976819 0.9414928461005320 F F F  
0.5266594570895063 0.2539490783947768 0.5686653913350684 F F F  
0.3712736494760370 0.5259744294729038 0.0724659256021507 F F F  
0.0146090272245493 0.0259367117877752 0.1341343634777662 F F F  
0.8772083771563555 0.7734494124819915 0.6363679300353356 F F F  
0.8741004562631165 0.5295915001591671 0.6392485096623706 F F F  
0.0216437733667226 0.2692900109462436 0.1406247782158778 F F F  
0.3686997782122173 0.7667321275379112 0.0685207481927152 F F F  
0.5116250261857358 0.0238415276437080 0.5645239987681122 F F F  
0.4511533629412013 0.2371283540885658 0.4065779905441412 F F F  
0.4419789788291184 0.5665655337327434 0.9177604700026709 F F F  
0.9473483218252886 0.0579370892579726 0.2983447326046041 F F F  
0.9407143131609419 0.7404321336438831 0.8042878621844112 F F F  
0.9337149990586017 0.5667730123227975 0.8086458139515313 F F F  
0.9641577769996246 0.2357905408015621 0.3125759591106699 F F F  
0.4336976654528343 0.7539707662879804 0.8947594052511038 F F F  
0.4504287097450975 0.0647044241183099 0.4003136708596977 F F F  
0.4983063588546500 0.1381913814077426 0.6610217506351612 F F F  
0.3913001114014971 0.6473921258364165 0.1512410329502167 F F F  
0.9953298686330229 0.1494916819737677 0.0649093413475060 F F F  
0.8866695978478992 0.6505273022447654 0.5601131120678515 F F F  
0.4055432007904960 0.2336657752368985 0.6355364236075939 F F F  
0.4927949139570824 0.5619794173841401 0.1281148243003461 F F F  
0.8945233020509384 0.0633179410270911 0.0782179935756259 F F F  
0.9939849665709366 0.7278549525497040 0.5746222796255018 F F F  
0.9928026321356076 0.5712976085382215 0.5739849063115796 F F F  
0.8971680231286536 0.2389457530239879 0.0897946745141624 F F F  
0.4909691933109047 0.7340514373204032 0.1270271252482229 F F F  
0.3902906327957714 0.0701086257557681 0.6085993190628051 F F F  
0.2939189948098186 0.1618147332652344 0.6258989271698253 F F F  
0.5936680772646469 0.6487160323482527 0.1371366876227421 F F F  
0.7956426029178231 0.1529552778324665 0.0736568233254424 F F F  
0.1009805980565078 0.6493326688857434 0.5752363474852072 F F F  
0.3005669831701290 0.2794148875622122 0.53525562303698455 F F F  
0.6092227294092399 0.5273804198016597 0.0538120129485588 F F F  
0.7791849818882316 0.0323721720508039 0.1579685924506404 F F F  
0.1052173244406586 0.7725534794382398 0.6544003602881672 F F F  
0.1031780216157226 0.5249106084005670 0.6539746533565914 F F F  
0.7788375744014256 0.2735369540928161 0.1559240094482446 F F F  
0.6066551808557741 0.7676960007105627 0.0464306748667662 F F F  
0.2709449304840213 0.0402225072495738 0.5450269336846898 F F F  
0.3267551708106714 0.2548416884562425 0.3423733883619428 F F F  
0.5697572763090746 0.5670854966916040 0.8694755615691173 F F F  
0.8212149176180413 0.0598984152844473 0.3471295188979799 F F F  
0.0691137262028957 0.7414690345646816 0.8439578363977053 F F F  
0.0624798367621188 0.5607487374920885 0.8386336287758865 F F F  
0.8333754391908534 0.2440211802094287 0.3341879362663611 F F F  
0.5739507169714073 0.7377079525209878 0.8538476960083627 F F F  
0.3223381252935495 0.0599603265168985 0.3601585527783389 F F F  
0.3977935814363003 0.1523060240610166 0.2730455331936102 F F F  
0.4853351571295930 0.6427309226431317 0.7668249156706459 F F F  
0.9015784195007909 0.1491981135912632 0.4298579957468673 F F F  
0.9910948060166674 0.6520077370314215 0.9346271758933811 F F F  
0.4249613167136967 0.5784697837075409 0.5928815257634714 F F F  
0.3863988469972971 0.7033415452247315 0.5572710659792326 F F F  
0.2399773433296662 0.6708257391668462 0.5462889217189296 T T T  
0.5766007771859295 0.6560817026802743 0.6116759954666923 T T T  
0.2745964867544303 0.6088601365029599 0.3837233354499950 T T T  
0.3233995677404357 0.5843627120385675 0.4550784063367294 T T T  
0.6223487904605702 0.4699590319938909 0.3025768631928057 T T T  
0.2728001587572338 0.3392923232586277 0.7990169356565651 T T T  
0.1255209371961138 0.8267552747958795 0.4050016767672695 T T T  
0.7722667053547279 0.9744739128195492 0.9007716999560150 F F F  
0.7729613146240183 0.3300367599951175 0.9001896811967319 F F F  
0.1258144947562693 0.4745801054383680 0.4032517429615589 F F F  
0.2779928440665054 0.9819471896905372 0.7950450938291025 F F F  
0.6254957312365329 0.8301059038447259 0.2902635037309624 F F F  
0.5210315021866461 0.4338714896379321 0.4620182958634332 F F F  
0.3790856026436372 0.3637811227400513 0.9525652673740530 F F F  
0.0246718846749009 0.8648210925616774 0.2518274114464007 F F F  
0.8759954784433814 0.9364820573279914 0.7490283527312959 F F F  
0.8764338747739220 0.3659280367759104 0.7498075555210535 F F F  
0.0237110007004078 0.4357615349913508 0.2520478395423233 F F F  
0.3686921307005161 0.9334677656495980 0.9553962724867107 F F F  
0.5235963224242163 0.8685499525588694 0.4419128360963607 F F F  
0.4709768889292751 0.4437737979950315 0.6770552059421470 F F F  
0.4353823343862647 0.3485933910848396 0.1635312355723291 F F F  
0.9729846784549794 0.8534594481744464 0.0351959404584742 F F F  
0.9227569961996688 0.9473326427427877 0.5304194190082200 F F F  
0.9251057860279019 0.3516356049554213 0.5305702484030250 F F F  
0.9699766131424378 0.4494933905686966 0.0354736520481180 F F F  
0.4194547635010368 0.9503537605713346 0.1715938250712874 F F F  
0.4723118941005484 0.8416740133024275 0.6547563744968380 F F F

0.3174017670884720 0.4546672006822158 0.6481560106940574 F F F  
0.5864527805024953 0.3487713238811571 0.1498364920065677 F F F  
0.8204214645565393 0.8522181053907263 0.0439782556351853 F F F  
0.0773322684688710 0.9497838390915549 0.5472125415501984 F F F  
0.0814311594669133 0.3513056287587422 0.5474719093695125 F F F  
0.8163896616048791 0.4510521791872576 0.0482147154614553 F F F  
0.5745745874361634 0.9529509843091580 0.1502669730427050 F F F  
0.3212510527998415 0.8566049945905836 0.6568058214839906 F F F  
0.2662691166719215 0.4299361551152015 0.4262808369574351 F F F  
0.6300611385488022 0.3689616090816175 0.9305951156052431 F F F  
0.7704332603430528 0.8627161453185196 0.2633345824848455 F F F  
0.1301494664457339 0.9359279390226475 0.7713565669124676 F F F  
0.1257511161018253 0.3660600580871802 0.7751543977468244 F F F  
0.7675618103076220 0.4361141495481619 0.2689336736756881 F F F  
0.6245096803026983 0.9369197571743892 0.9234713576301704 F F F  
0.2682478917243460 0.8653556079273693 0.4412101528313560 F F F  
0.4044195189732153 0.4679276040980624 0.3223011119443963 F F F  
0.4977457502859697 0.3186508032179336 0.8249750311568332 F F F  
0.9011315237582856 0.8245407671022281 0.3748720467095921 F F F  
0.9977000461603618 0.975545494502099 0.8781939951414136 F F F  
0.9949826326906119 0.3252566677386887 0.8824421600749077 F F F  
0.8999513138355897 0.4743391942839631 0.3770111151115387 F F F  
0.4912597235712376 0.9576545676195350 0.8174979076491576 F F F  
0.3977098851555340 0.8271791177255180 0.3245817794234204 F F F  
0.6253789196492811 0.2280508934686775 0.2892356829757968 F F F  
0.1165855865718853 0.0722199777650323 0.4080834195618388 F F F  
0.7769782186602907 0.7296798371625668 0.9120367618629971 F F F  
0.7743404643318613 0.5735925058629578 0.9162203230327086 F F F  
0.1256876146523001 0.2266904029615946 0.4152529327357171 F F F  
0.2744932659027095 0.7290756436618036 0.7876152675053769 F F F  
0.6185523716745157 0.0713822155968895 0.2925083019533292 F F F  
0.5182879860994670 0.2728617452650790 0.4499733878509264 F F F  
0.3775334835972495 0.5204402905782001 0.9494607748703129 F F F  
0.0141335231620780 0.0214944168802606 0.2566297298333071 F F F  
0.8763515718995244 0.7793816677931799 0.7588006671190747 F F F  
0.8733288678705527 0.5228609040024621 0.7615248199923480 F F F  
0.0250831547376885 0.2777536858019355 0.2625535876807824 F F F  
0.3656039610958038 0.7768880099315216 0.9465650550709463 F F F  
0.5146620272683081 0.0243023580407308 0.4420394422055816 F F F  
0.4832700880441818 0.2184238343638816 0.6580138268360164 F F F  
0.4142809476257325 0.5692910959402308 0.1534912450652769 F F F  
0.9728659218819922 0.0714567284574727 0.0537744842135496 F F F  
0.9148189533275976 0.7270388038554410 0.5531229935733855 F F F  
0.9133149496512107 0.5734109974587235 0.5545258307164288 F F F  
0.9750142123425605 0.2284471036466963 0.0608540933874434 F F F  
0.4122214843910824 0.7262358515509972 0.1511607838850317 F F F  
0.4664746649234819 0.0638536753665008 0.6472008342924794 F F F  
0.3254384394715466 0.2372725567853314 0.6336766572232686 F F F  
0.5719447893340323 0.5698658205935818 0.1425004919312991 F F F  
0.8152179257942941 0.0735304375040827 0.0671351926613860 F F F  
0.0735804645872144 0.7274281159362516 0.5646818465554608 F F F  
0.0726424087814185 0.5714945182526755 0.5655154104267096 F F F  
0.8179835045783908 0.2316632688996040 0.0687740778129390 F F F  
0.5707627212819482 0.7275328928952586 0.1376142365631893 F F F  
0.3118575400053414 0.0817812063246428 0.6306203740926307 F F F  
0.2699343843055479 0.2779548436639036 0.4215819272601222 F F F  
0.6257086959106477 0.5265194346942403 0.9333139422165712 F F F  
0.7669285076745224 0.0209330140927201 0.2782826884623164 F F F  
0.1250975577737468 0.7767612715967670 0.7737946883161460 F F F  
0.1213705443347962 0.5241406520717192 0.7754073939430683 F F F  
0.7706676796421091 0.2786181175202166 0.2782108774798963 F F F  
0.6252421755895786 0.7754833529625734 0.9268303839931274 F F F  
0.2635108698896581 0.0249296467855121 0.4246805189620299 F F F  
0.4007362948667811 0.2301965825334568 0.3107178012687506 F F F  
0.4944976968951894 0.5702240093568562 0.8253190268242891 F F F  
0.8955818771684255 0.0717946401447173 0.3902189249690995 F F F  
0.9960984925648081 0.7288478151007292 0.8922398780487359 F F F  
0.9922562863154133 0.5748248345526199 0.8925626597474592 F F F  
0.9026674069148394 0.2269358005276728 0.3908853223116389 F F F  
0.3949431575621430 0.0748032319462827 0.3127738168971673 F F F

Structure CH4/16 S=8/2

1.0000000000000000  
20.1473052208877697 0.0000000000000000 0.0000000000000000  
0.0000000000000000 19.7681594983396742 0.0000000000000000  
0.0000000000000000 0.0000000000000000 13.2309279702282054  
Al C Fe H O Si  
2 1 2 10 198 94  
Direct  
0.2734442419282321 0.5677327095416415 0.7860904394544588  
0.4930200408756953 0.7277247206754640 0.8137840580564762  
0.4291076413405996 0.6537772491010992 0.3777704789411563  
0.3291741644950148 0.6236391882447451 0.6011110041377846  
0.4968111831645050 0.6682047621994784 0.6167822220605917  
0.5240804094401162 0.6870590555671263 0.4497194263109917  
0.1934994190089363 0.6643128394010228 0.5865423644074015  
0.2309269712820927 0.6921842700937227 0.4917522814990150  
0.606980680024782 0.6968696548836293 0.7305749707102411  
0.6183561417793842 0.7087240182610642 0.6135780187146926  
0.2739526913445443 0.5719843827045621 0.4542776342208162  
0.4406837460711548 0.6094568241523347 0.4237503744980193  
0.4707049902549667 0.6649432807314083 0.3266222838726239

0.4197483560568977 0.6973641779215330 0.4263265700568206  
0.3848442310648907 0.6433282116062987 0.3334904742760407  
0.7040791742408512 0.4754268735314502 0.3099150906919300  
0.1946171834420663 0.3290568147296759 0.8115172242883327  
0.2064380095991472 0.8186494667709207 0.3957426332821147  
0.6930509252473537 0.9719529695183113 0.8824215268507267  
0.6948145202041197 0.3230087878711449 0.8860624469508142  
0.2065517444552778 0.4835431641302191 0.3956700704687061  
0.2002148179368765 0.9711633385319393 0.8064519462053096  
0.7049384141964558 0.8176089809843292 0.2983510308871592  
0.5909064481915717 0.4672347633139829 0.4112964929049566  
0.3071992147914672 0.3390381592324342 0.9079521478017933  
0.0937683267038013 0.8295191422416992 0.2942496765836497  
0.8102804877589794 0.9727098289519759 0.7910442549901894  
0.8075079552018504 0.3309492400250381 0.7874201978170740  
0.0942932504783065 0.4693368561327752 0.2929798616274901  
0.3143750862723375 0.9823083225676479 0.9025528630388081  
0.5959517232648086 0.8355121571148237 0.4018375956578504  
0.5978381521964814 0.5419172894665507 0.2448488486708587  
0.3013055484645005 0.2714753161547737 0.7338899473413418  
0.1007554682654313 0.7559375817786809 0.4638026143817174  
0.7915500498636475 0.0399703914092414 0.9630136534745304  
0.8023495103474964 0.2588849305325407 0.9567684401171098  
0.0990853800774997 0.5436413896609067 0.4618001373644583  
0.2936763277657526 0.0517899068329812 0.7354213612856545  
0.5924380337658678 0.7566664513810564 0.2408013883593844  
0.6016883546012218 0.4072928014786811 0.2342254391801627  
0.2898741778172841 0.4071335560280834 0.7370083466723425  
0.1072700224256282 0.8913492034962269 0.4696735716870980  
0.7959722510251688 0.9044783369226566 0.9577699815132891  
0.7949644204593411 0.3937716124214392 0.9611928908827564  
0.1077803247544226 0.4088919765757070 0.4704114441344173  
0.3108200380767057 0.9189811782063969 0.7252241005420865  
0.6075902056114417 0.8896760426391930 0.2170977308792115  
0.5262676233528459 0.4417042397789283 0.5793958517574986  
0.3804076849564220 0.3543637525594774 0.0718039921053209  
0.0205330062764868 0.8551360997327242 0.1336069419571777  
0.8772264795154775 0.9389284571049002 0.6290753244012613  
0.8788959422580821 0.3617128743382462 0.6287499532641613  
0.0190398441267234 0.4444413998365179 0.1329162214093035  
0.3704446594897655 0.9419911443845820 0.0744635417416186  
0.5249407185576428 0.8627123252397866 0.5638950016470099  
0.5205260523871602 0.3534505305356222 0.4277617713194669  
0.3945255236047510 0.4407522125981420 0.9174443782559685  
0.0166411798665706 0.9397000783719295 0.2911224598000823  
0.8796597297333452 0.8570983096585910 0.7898347318479292  
0.8808371770046985 0.4437399697623364 0.7897653304801414  
0.0189019075770457 0.3586045269900445 0.2897256275845380  
0.3499764166325652 0.8558884658798086 0.9228157013275972  
0.5194937081770057 0.9438567029558923 0.4019392044929141  
0.4581867759277569 0.4697871225008918 0.4123300979461720  
0.4355208184845644 0.3145576161378358 0.8989714393762211  
0.9641050702344909 0.8179734058017195 0.3081880723872152  
0.9426998894315131 0.9735114782035196 0.7951311979368388  
0.9385033412038239 0.3246194629273873 0.7986774873369931  
0.9645133678884668 0.4799348566280796 0.3085161864934372  
0.4433046582091064 0.9518120978571768 0.9120982547297738  
0.4645284437628357 0.8248000310615706 0.3921967046121120  
0.4773496309462055 0.5111310767313320 0.7346525910237500  
0.4292349688253373 0.2711328305360691 0.2098635110987005  
0.9762105150811557 0.7768006957768619 0.9877831354272397  
0.9183189840698570 0.0244559472754960 0.4891504873731785  
0.9125939766534539 0.2730739939554406 0.4894358683260219  
0.9763847735038652 0.5243852481332005 0.9868004626319555  
0.4141376741814198 0.0288368931211577 0.2085902986815000  
0.4882048989352902 0.7638052175446997 0.6912754246808374  
0.3994174437671458 0.4299357227669546 0.6289892053898686  
0.5092553415419442 0.3559508283660641 0.1135262079054886  
0.8944257705197122 0.8638525970335615 0.0777099066718781  
0.0024882109093371 0.9357845359752623 0.5695379655834043  
0.0032240565550110 0.3578017929299427 0.5642960194431731  
0.8926837125703566 0.4394901277627138 0.0766564050778411  
0.4973031270840040 0.9365105821083796 0.1326104962825387  
0.3990131630295715 0.8530937876154312 0.6159097084846920  
0.4942712930314785 0.3795466432380357 0.7467659439188897  
0.4237163372554045 0.4017142575879287 0.2482557504241354  
0.9898740066458562 0.9084352971803845 0.9562249635982208  
0.9049550349166938 0.8940474153311513 0.4472393510880229  
0.9059054814349990 0.4039735174596016 0.4464793208110113  
0.9881609141973229 0.3919442426917386 0.9559470622117235  
0.3997488433416221 0.9001926460902280 0.2574334703467693  
0.4903907154564940 0.8886727967517996 0.7521681052112474  
0.3164956910965686 0.5314776622132634 0.6796023671926708  
0.5999084769293173 0.2759830651943029 0.1978844791371809  
0.8085880066862655 0.7746256132992519 0.0050698852460681  
0.0917906455980249 0.0233027661082991 0.4984344737802932  
0.0999723495946317 0.2759590812912420 0.5011854574612430  
0.8014639390199841 0.5243162008490797 0.0047522238169102  
0.5875751531795397 0.0221249501870445 0.2039854967567161  
0.3064354827651805 0.7837850803457194 0.7125891309387883  
0.2800242725492753 0.4375227858435344 0.5450890008212185  
0.6345486065096831 0.3612290840489702 0.0540475383694965

0.7681513968758651 0.8657232974296432 0.1392392086803467  
0.1238490671142926 0.9423030577842804 0.6494664145104717  
0.1216343711999048 0.3588328101319014 0.6523959066191457  
0.7669115420066475 0.4348731729561626 0.1433358942214093  
0.6143322064781592 0.9511037771936458 0.0410066682130289  
0.2727035902379717 0.8592972615296914 0.5575094607848180  
0.3314348600126883 0.4560220813632621 0.3612668641790630  
0.5657755071448178 0.3244719299504401 0.8933197006359885  
0.8347482371973832 0.8353592835182136 0.3022296454913074  
0.0719548720180975 0.9671804131422297 0.8283954992580028  
0.0669569008043256 0.3248582316846865 0.8284496665533687  
0.8346030207923102 0.4631036438993588 0.3041643493552897  
0.5662573173317754 0.9737056597462128 0.8560043665158343  
0.3342229064581064 0.8258955275187976 0.3881082422345692  
0.2473073463477707 0.3560427988739615 0.3934461377386338  
0.6310402464159508 0.4417039528733185 0.8932222731229685  
0.7547514977402828 0.9420205989107565 0.3040774853628220  
0.1400307517107562 0.8533390701237650 0.7997441508249354  
0.1253134861934407 0.4438089256620197 0.8083298732092743  
0.7576186326940376 0.3536790820911951 0.3050721694227452  
0.6256759568720298 0.8572756149996188 0.8970362071827749  
0.2631134729441058 0.9408635457404049 0.3992010414632041  
0.4087026834403601 0.5353531825174689 0.2569519095497559  
0.5042462780291682 0.2468370473249507 0.7639363112230572  
0.8858622593086314 0.7597325061268397 0.4413696420139284  
0.9974339183704183 0.0435703764845415 0.9412074819344299  
0.9906252839754262 0.2563331661166595 0.9484375583640220  
0.8862365165949090 0.5388516140423150 0.4418497392220074  
0.4680231256926383 0.0227489755859400 0.7480329858044868  
0.4017981685802602 0.7643325008714474 0.2462891431316269  
0.7046483071858166 0.2311042797367698 0.3040029499093521  
0.1895304482216445 0.5600830610056257 0.7728004716992753  
0.1959900422342251 0.0552810736486062 0.3804495318311634  
0.7000183927536686 0.7474855396144552 0.8944658748729121  
0.6943948707371419 0.5591672712783597 0.8937289882068078  
0.2089176189216878 0.2297499665834411 0.4043552681883549  
0.1911545145046836 0.7303962278657832 0.7765449666590828  
0.6984198012781645 0.0622928151400304 0.3004875544759023  
0.5887570855859325 0.2423793453621186 0.3932220076984060  
0.3057459672368323 0.5413809044787832 0.8987329473338719  
0.0772233673313053 0.0583709022295757 0.3043782478926421  
0.8171622494076881 0.7395132361869539 0.8106677961194036  
0.8117960969994236 0.5577652319270034 0.8098837054398643  
0.0954572627738841 0.2487883359808466 0.3051016432308435  
0.2953958307225640 0.7365971816083983 0.8988326624556414  
0.5851880435996326 0.0595557733733646 0.3983141071276965  
0.6054065386037296 0.1493968992885265 0.2510186414963844  
0.2950143436671046 0.6513988132459991 0.7438304973917036  
0.1087839259406499 0.1493358468543982 0.4423010965285577  
0.7836820285475825 0.6499558076159349 0.9507408762654200  
0.5272473831392008 0.2557515937419078 0.5668070953212768  
0.3734610147592753 0.5265700693410366 0.0682526465757144  
0.0161564723547435 0.0241441803744473 0.1355467000749186  
0.8751687663155847 0.7706634803850899 0.6382883738229120  
0.8734025060986811 0.5299737066137989 0.6386353125386455  
0.0224544156779528 0.2696542420820695 0.1407019490992339  
0.3661761524876481 0.7616747076737647 0.0616477568945352  
0.5143428985010801 0.0237539797060255 0.5609246421869644  
0.4556943002690401 0.2381452174144620 0.4013443081462807  
0.4363180366840571 0.5668306243593360 0.9053013026345360  
0.9455488754408314 0.0533575772153631 0.2971956482248197  
0.9493078220789493 0.7428668493377012 0.7970821153811158  
0.9437208102489056 0.5617608093619975 0.7997639626619730  
0.9639135133264509 0.2376201088659973 0.3123518382200511  
0.4282303137873755 0.7499410742223158 0.8880101944728238  
0.4535272830658681 0.0603936344777454 0.3940448604694081  
0.4989210008543387 0.1384329826933978 0.6563719560136044  
0.4007072583097273 0.6466843283786174 0.1473205602938688  
0.0017256620484413 0.1485586908325057 0.0641642667003379  
0.8800708458991049 0.6499771953802186 0.5523012280995527  
0.4056599597626928 0.2329953806735964 0.6299598132500566  
0.4979220297364810 0.5572806671213746 0.1144519240189861  
0.8988667436777739 0.0647493847408341 0.0703825375920832  
0.9880684788675898 0.7276578407958825 0.5570593980389058  
0.9872349622836912 0.5727987778333340 0.5573510249904937  
0.8998463605867812 0.2334202159958506 0.0889181358242831  
0.4943211573559120 0.7373330171983840 0.1083098862610706  
0.3923180230935011 0.0686038224220582 0.6016191420714588  
0.2952125983968638 0.1594055189072014 0.6203743080275101  
0.5943738948096821 0.6484526564249286 0.124483589511352  
0.7965766762541597 0.1500851689142126 0.0743633844473665  
0.0949401825079038 0.6490131133505179 0.5829212079572208  
0.2993549143789321 0.2792195579821083 0.5345788333059176  
0.6169560846908247 0.5260996502106215 0.0481095100025670  
0.7890905774756667 0.0295958439357365 0.1630189558416021  
0.0905229622218731 0.7718364897727380 0.6626542789504050  
0.0875351306482070 0.5237367019465853 0.6601385397381588  
0.7823856067608893 0.2721887666950615 0.1529861703083367  
0.6151520596618782 0.7693998789783398 0.0454445251065202  
0.2729871109635431 0.0375802733922288 0.5388889880080479  
0.3307685433832519 0.2574008687573565 0.3421800143266212  
0.5657921892819222 0.5576380777617603 0.8679253150816171

0.8213536665803927 0.0523303079412377 0.3574086154132242  
0.0734307693011673 0.7439967404916296 0.8590768114167514  
0.0699927216685698 0.5604972883460928 0.8529709210144787  
0.8329544889502435 0.2442401046779286 0.3342096330068040  
0.5734071979003276 0.7363200265452362 0.8584692320698092  
0.3249919525520658 0.0546880772916597 0.3540121866230725  
0.3979095498553150 0.1516621046426802 0.2754146756457740  
0.4893493256416351 0.6428759771183193 0.7659921234069748  
0.9018371115637797 0.1480185956821588 0.4251594562007190  
0.9897304768663162 0.6513327167475066 0.9316901411643213  
0.5113173927098178 0.5928986902991027 0.5708745872862716  
0.4076322989776484 0.6671284919013922 0.6021995143541200  
0.5246678913915147 0.7157206496181513 0.5101315889290740  
0.2364344434429817 0.6825493139503690 0.5635871328024623  
0.6018384623504169 0.6760791663749662 0.6630162768793878  
0.3181212007368985 0.5864457837699762 0.4759592210136535  
0.6237164209759866 0.4729960430311036 0.2995227374342493  
0.2737924474206055 0.3365070537920658 0.7961947681253213  
0.1264255617924128 0.8242001796542885 0.4064824222190664  
0.7723195460477822 0.9725078426680362 0.8997726101099440  
0.7746375687309761 0.3260929850199237 0.8994093101840426  
0.1262541182966431 0.4757407112321703 0.4056605537275796  
0.2793910630596548 0.9803130328402382 0.7918416144017157  
0.6248636159285206 0.8251129457726274 0.2882184906309110  
0.5239872760284364 0.4331614996136416 0.4577781720943413  
0.3794432282349690 0.3627744924027572 0.9497310494968576  
0.0234496083701831 0.8610129060504406 0.2554588874598603  
0.8773854327157758 0.9354232788074113 0.7512503826186417  
0.8765433442071996 0.3656534788112835 0.7505345298477268  
0.0238988379470045 0.4375615914776828 0.2545798968446471  
0.3697200256506412 0.9325908095269799 0.9529606595420277  
0.5257374814370651 0.8659798446688375 0.4416842026747886  
0.4744108294451320 0.4410237727144796 0.6729211093209465  
0.4351774811103871 0.3460779770214378 0.1609112089257618  
0.9701019431002981 0.8512605266770603 0.0381044799508138  
0.9261858846409589 0.9482842738744404 0.5330077442990879  
0.9259226505313869 0.3489374361618931 0.5315279073025354  
0.9687943725459774 0.4499619328404064 0.0371461528374254  
0.4213285078333724 0.9517532358475880 0.1681621886892128  
0.4750706188314675 0.8413517261861032 0.6546970371045688  
0.3224835946958917 0.4515053433744540 0.6463824038307033  
0.5861960549830386 0.3501215593876753 0.1502998795284567  
0.8172962789883167 0.8518187485010086 0.0449649093843773  
0.0808490298519965 0.9487338778942299 0.5469432316200158  
0.0826685655140803 0.3501772959668296 0.5467179944201367  
0.8145693928616330 0.4483098803654754 0.0469028182428538  
0.5763011780764100 0.9497407640417735 0.1487908058143509  
0.3222409430521542 0.8535946585859141 0.6537755785928803  
0.2677433462534646 0.4328070375048922 0.4244125927199650  
0.6312744000284360 0.3633642052992618 0.9313999311920970  
0.7656561695410078 0.8657118338855292 0.2616664648519300  
0.1335341136477341 0.9329817990966434 0.7702584117699180  
0.1267633151105243 0.3651188176372007 0.7743908803031221  
0.7656054233541870 0.4313070651058976 0.2658464449939963  
0.6245279788163766 0.9376261941346382 0.9209182642167180  
0.2698343990273365 0.8626792488133170 0.4349615663172021  
0.4057716733113106 0.4655897938780324 0.3195883248431658  
0.4997986964787341 0.3173968102295515 0.8255323950302424  
0.8976217179124292 0.8278445151648880 0.3759173061308739  
0.0001769212684716 0.9722346049093782 0.8809429921030036  
0.9959841740474789 0.3257984454132902 0.8842499454934427  
0.8980973984851834 0.4706422200600943 0.3765566832342478  
0.4919335768543441 0.9589754894087245 0.8155224514191287  
0.4003733531814480 0.8293994928641792 0.3191173948354532  
0.6248749196262281 0.2255138486903235 0.2865303575855104  
0.1190636217378292 0.0712467203941434 0.4074594698074228  
0.7766845362640996 0.7282772882185822 0.9158494384754025  
0.7725818199465423 0.5722327041201346 0.9151431903014166  
0.1284325423641279 0.2266033244781432 0.4129830009720042  
0.2716192985287963 0.7267170919904314 0.7824489469270731  
0.6192529065983767 0.0723908801654011 0.2880194041541806  
0.5228391354336877 0.2726378361360657 0.4469097705387305  
0.3753508772866723 0.5190408527130709 0.9457867457961767  
0.0140234159715025 0.0188296975323829 0.2578145077552498  
0.8801278422753438 0.7775077618389012 0.7601375112890126  
0.8771760429845437 0.5233717346270047 0.7605764507177158  
0.0255303971030358 0.2786443160101093 0.2625463395650178  
0.3617158859094421 0.7754064293305480 0.9411596608986429  
0.5183829428913309 0.0221252693695190 0.4384000221045910  
0.4833665388949612 0.2186111762999610 0.6537634668033857  
0.4206186878118505 0.5673753914985911 0.1464406737841707  
0.9779883653554016 0.0708042832966499 0.0525315463767854  
0.9078080470075464 0.7266838169214286 0.5476750664977257  
0.9071433866154688 0.5729112129406407 0.5479331123416660  
0.9780754120139866 0.2267808014667337 0.0604634088735802  
0.4167793138887332 0.7267597734904437 0.1405563467099800  
0.4682154775665162 0.0635824388200035 0.6423218001396465  
0.3255173930716153 0.2353788317172213 0.6304130050631689  
0.5764772297625169 0.5687456895875386 0.1333644077893325  
0.8190285350898175 0.0713541052039143 0.0679007425617902  
0.0675077999295967 0.7266988468648874 0.5668045500394648  
0.0667806707342443 0.5713932472124877 0.5663543305568702

0.8206654964436886 0.2283330802830291 0.0672382495891780  
0.5732806101762218 0.7275389639123224 0.1293656138361096  
0.3138717225829832 0.0794658032864257 0.6243297064818412  
0.2721918081284445 0.2796132365686481 0.4187987661543722  
0.6265849166431064 0.5208264572285106 0.9259414793586663  
0.7665618933121991 0.0217797793644443 0.2804524640348223  
0.1236728081435675 0.7748134501301451 0.7751143329561074  
0.1197512266714952 0.5226399818360655 0.7742746867529215  
0.7697785579745737 0.2750355127918844 0.2745665691487364  
0.6273098011045661 0.7771877888434408 0.9239810740928802  
0.2650806974690085 0.0220492459745923 0.4185764923229254  
0.4034443562364733 0.2300917674100414 0.3082755688311060  
0.4929412213138042 0.5678576431496265 0.8183520276267932  
0.8965767518269183 0.0693902238782065 0.3920542487325125  
0.9974738385739537 0.7289325646239562 0.8939569778504707  
0.9953450539201354 0.5735348817334812 0.8930116235410611  
0.9023867106729599 0.2264422603543947 0.3898293375245031  
0.3973753964297314 0.0730974479698036 0.3084228865152974

Structure CH4/16v S=8/2

1.0000000000000000  
20.1473052208877697 0.0000000000000000 0.0000000000000000  
0.0000000000000000 19.7681594983396742 0.0000000000000000  
0.0000000000000000 0.0000000000000000 13.2309279702280254

Al C Fe H O Si

2 1 2 10 198 94

Direct

0.2759819363230211 0.5688145310573114 0.7886046830794157  
0.4944132199542348 0.7275575737133371 0.8103866289444496  
0.2195959683793915 0.6441861383089544 0.2906117591925105  
0.3272348764992420 0.6209434359189661 0.5956237881011897  
0.4784360112371731 0.6646802828540715 0.6052424364350247  
0.4753304870134190 0.7385146157000098 0.4661667160772133  
0.1912005052839212 0.6517728182278606 0.5749427263673468  
0.2317706508744018 0.6465591504524824 0.4727567075569107  
0.6038779032045379 0.6786119933435050 0.6793804752895348  
0.5995522387819021 0.6813873894541289 0.5604894129879573  
0.3771707502964317 0.5972005589548059 0.4294498759811829  
0.2516221410036190 0.6004509169994072 0.3051124474078626  
0.2472353305243581 0.6913247440551700 0.3024913528185257  
0.1757540294474831 0.6425338499463105 0.3400850498334028  
0.2020667130443111 0.6424414979397364 0.2122048435266119  
0.7039679508507408 0.4719695393851145 0.3154164961173108  
0.1951273911909319 0.3299105065064469 0.8133000071038996  
0.2072043052684845 0.8233955317824598 0.3961460973810514  
0.6931764490660577 0.9711908800586967 0.8823728514826327  
0.6942290877321492 0.3257216330927123 0.8863250975973931  
0.2053147583203245 0.4819470307296451 0.3956655603593193  
0.2008772981340254 0.9706925815329981 0.8080299729352428  
0.7056847224005450 0.8201349653677211 0.3023567749590800  
0.5887983997205867 0.4672830596510297 0.4126181565951512  
0.3071032658854538 0.3447738018662521 0.9106128499016619  
0.0948794760083698 0.8301231233652232 0.2941411764283313  
0.8103532004889389 0.9723160684955815 0.7918688976783284  
0.8070605385704472 0.3329314817516738 0.7892919273741207  
0.0941492731339432 0.4684436567255468 0.2920189085810957  
0.3140751544136767 0.9822105100041212 0.9068107092169465  
0.5955769509435956 0.8380171537711295 0.4035018836183671  
0.6018412703909851 0.5414227630504580 0.2467009279234618  
0.3042786579728472 0.2743689398228101 0.7393464061107997  
0.1024649436904004 0.7566490854258666 0.4634602822058277  
0.7909393232546105 0.0407483895648739 0.9626571665034622  
0.8015476142633813 0.2611139191207671 0.9584507890551707  
0.0967824358532863 0.5428952226251292 0.4600753486345286  
0.2943721071600027 0.0525386258697262 0.7403881932298693  
0.5948815946108612 0.7579917456730386 0.2433251978679948  
0.6007666706518504 0.4063426081929787 0.2370087287213543  
0.2882627054403731 0.4096971973828935 0.7370807007371813  
0.1056305236578734 0.8917268861568745 0.4700961601343787  
0.7962200776745242 0.9055184392888554 0.9604948915180661  
0.7937033047553299 0.3960210270729285 0.9635734643139268  
0.1053675308310994 0.4086159132137649 0.4703751558690158  
0.3129087965171382 0.9202142732935155 0.7280817829480115  
0.6076879142634964 0.8914116662310910 0.2196533579148804  
0.5261183033850608 0.4459662598119244 0.5826868883137393  
0.381274854051274 0.3537638766600511 0.0740038023388848  
0.0219596018949503 0.8561471120097266 0.1332531396908112  
0.8772199908323474 0.9384523057380346 0.6299370143061404  
0.8784071377435083 0.3611478737488960 0.6296104009735523  
0.0205875226928124 0.4424859259219202 0.1312305395779294  
0.3710873619528412 0.9422657428377706 0.0782723954797432  
0.5259008717990816 0.8647697479410801 0.5661211245758615  
0.5177469676411949 0.3539995241515018 0.4354274445971064  
0.3981136358319250 0.4431507260058099 0.9245460334508672  
0.0168270489644757 0.9397203871344740 0.2917136203175615  
0.8803973718174009 0.8571697092849827 0.7914175545818449  
0.8836885869105189 0.4432078435851367 0.7906784358014042  
0.0185864557397747 0.3578597057542404 0.2896383671522312  
0.3497047333424930 0.8559175576448271 0.9267317996783079  
0.5158758960404634 0.9454523598678712 0.4025807360662434  
0.4555177484664393 0.4694529473951289 0.4166592835797907  
0.4345497231004933 0.3162281496917818 0.8983777872810151

0.9650693836851887 0.8177334679552132 0.3067419535567550  
0.9426260271393047 0.9740234124953003 0.7958281502908827  
0.9378278928946470 0.3223985415978914 0.7993272149981918  
0.9641051076653404 0.4791382070610818 0.3047457295029793  
0.4430725042839924 0.9514963454191259 0.9147332971075045  
0.4645949424820491 0.8233223557822958 0.4007896962990412  
0.4771127610411485 0.5092936634583671 0.7446721430313351  
0.4291713585430832 0.2771776898580588 0.2197819216204311  
0.9770590425652104 0.7767176385768562 0.9893463639040181  
0.9185408582807592 0.0233877571987091 0.4895462956851411  
0.9134730125586344 0.2739553691217854 0.4891382854958584  
0.9782694304898449 0.5232284559147941 0.9860025406782043  
0.412955523033424 0.0282764598433373 0.2145338961866210  
0.4919098765006968 0.7632290330717549 0.6865141783056280  
0.3999422057812111 0.4299045041119332 0.6340611294384725  
0.5106831648383975 0.3537034928085024 0.1131684265905010  
0.8956325378016571 0.8644643235209297 0.0778386845882112  
0.0030644440737680 0.9368942814967550 0.5739766896701510  
0.0035777218631189 0.3569037705179575 0.5701077467694677  
0.8941994523945501 0.4385241773771797 0.0764845654107981  
0.4984903174723138 0.9399318460872063 0.1332827293620281  
0.4000283760516429 0.8529490666688079 0.6193371975000057  
0.4966446296455889 0.3782016276373068 0.7457882688707115  
0.4291045561656376 0.4112440737657175 0.2408808347720975  
0.9912313031435008 0.9081377030220599 0.9551743664096300  
0.9079305905411980 0.8925135443635905 0.4494808286554588  
0.9092377363343347 0.4053848284181071 0.4492108585511499  
0.9889696820280093 0.3908124481369705 0.9542023214482858  
0.4045775477220284 0.8977446001673065 0.2585687887726121  
0.4914925770059111 0.8873516266276325 0.7560419759214481  
0.3169387510480375 0.5331467045581658 0.6785373659701197  
0.6029979634139139 0.2756659495562668 0.1973931457472680  
0.8099784168429918 0.7752532048965822 0.0038255589737477  
0.0917785144688159 0.0236146209887611 0.4993787783593215  
0.0991425325359729 0.2756593405489114 0.5027060736306648  
0.8036983012836153 0.5257567423602681 0.0094920162499219  
0.5894077705085271 0.0238885565201807 0.2049915478342460  
0.3051201906738586 0.7853210579880289 0.7162755878884695  
0.2828138708663900 0.4399467897756537 0.5436496455913262  
0.6357455454368669 0.3637167979742636 0.0555140672010368  
0.7699800134041456 0.8642822274141211 0.1415842398332540  
0.1256956577852030 0.9423181143170174 0.6495412088496324  
0.1238094951345171 0.3593253935780179 0.6523101332704322  
0.7695379785042701 0.4357176461895314 0.1481763407689538  
0.6161926381865651 0.9513199768797597 0.0428187089820380  
0.2737885440158636 0.8605616103909297 0.5604694271718113  
0.3304075284967775 0.4507385767098058 0.3557224184363914  
0.5651671021557144 0.3253482256560850 0.8974846732111416  
0.8355784010901625 0.8346941076583441 0.3061889075659248  
0.0721499213091991 0.9686476581421141 0.8268599001798470  
0.0668301864446595 0.3228670564027742 0.8255882574717257  
0.8341073790389275 0.4655062846313538 0.3120155710199070  
0.5661987414100889 0.9733999704170918 0.8593501678994401  
0.3348985129723099 0.8276883758404385 0.3906995368045875  
0.2456593299804328 0.3552178045112240 0.3990182150727608  
0.6284661298766224 0.4436250599608758 0.8936458506358398  
0.7577568331963159 0.9430355236683924 0.3045662278403319  
0.1390385474429844 0.8539102040290217 0.8015013693434953  
0.1228084143756276 0.4429095551322282 0.8105283993894651  
0.7619750044727218 0.3528954029962478 0.3084698626704813  
0.6256775202338366 0.8565802623193824 0.8991662539325724  
0.2672035922751968 0.9438414859520027 0.4035916813733358  
0.4052839209836461 0.5422988278817185 0.2699224734568779  
0.5052328078700367 0.2463176852290668 0.7679881210867727  
0.8895508529944669 0.7582864559316701 0.4420492892235536  
0.9979378682863494 0.0435566804697309 0.9418790522329710  
0.9920649351999754 0.2552848684437399 0.9487566154163785  
0.8926885889456482 0.5403988185877732 0.4439539753628958  
0.4680783410525958 0.0211537206414148 0.7497662694529752  
0.4036634328251324 0.7611494606191411 0.2556494062458634  
0.7058037822664823 0.2317068613328435 0.3080336995668193  
0.1923425043061712 0.5568838169131368 0.7830370633825937  
0.1967152995265210 0.0561676633621331 0.3831016156771718  
0.7001379227270470 0.7467633879919705 0.8965254798582251  
0.6956478269529053 0.5591299325488137 0.9003618687544839  
0.2091747363280932 0.2286893138007978 0.4099956608256869  
0.1921644717422578 0.7314003990542565 0.7835073749035938  
0.6996812216580027 0.0627307264645820 0.3035534945874492  
0.5892782749837350 0.2462613026524225 0.3942903452627795  
0.3119183774584164 0.5448474502178609 0.8999658551206998  
0.0790911919978984 0.0574426969424588 0.3041859840905356  
0.8161826504739303 0.7404030474446966 0.8089543917551506  
0.8111126089077263 0.5549207435376965 0.8123076049995157  
0.0972060419315445 0.2495137390531005 0.3061575019361018  
0.2988716828790460 0.7351431970748191 0.9020942401061408  
0.5866917183135663 0.0580614467958341 0.4008982486658391  
0.6060032326958249 0.1502750165275862 0.2566720243192981  
0.2932788030445019 0.6522582801965960 0.7433116504044138  
0.1076597765710995 0.1493230453777745 0.4425137832124180  
0.7860921381598805 0.6504033255475095 0.9501290637546788  
0.5294169895042660 0.2540083909658360 0.5702791975450477  
0.3744815151007321 0.5284757366910022 0.0753024591424303

0.0165871984451722 0.0239466704627456 0.1360806248123201  
0.8775766957375513 0.7716870947304089 0.6386176304145386  
0.8731278667207041 0.5297476198415443 0.6401275851921892  
0.0237128829058805 0.2686964477504703 0.1413800977101750  
0.3702052099791200 0.7634591330888484 0.0647976265297150  
0.5141891894992771 0.0243502872373665 0.5627363246863517  
0.4564933791071645 0.2368589077952191 0.4064464777933241  
0.4421457742095533 0.5687577682741184 0.9153149222304384  
0.9473892692960860 0.0543135185593118 0.2986811255898127  
0.9485134252245716 0.7419343874169114 0.7995414335318952  
0.9426352121820507 0.5630742575121253 0.8015751754750076  
0.9658059150190295 0.2361714819383721 0.3135517929635080  
0.4304093536743532 0.7525984011344418 0.8860477526361756  
0.4551442355777249 0.0648126148675535 0.3959706063019275  
0.4986825763875121 0.1370734624028916 0.6611544969314183  
0.4003487105874186 0.6485353703432575 0.1544681755885507  
0.0006029389927625 0.1481753558694195 0.0657223823958806  
0.8826913055348271 0.6500887047880275 0.5562787682080990  
0.4071211551691213 0.2344407078613323 0.6326828617176039  
0.4972558633056339 0.5579184470934945 0.1280980706944119  
0.8988104185800732 0.0630369307443865 0.0705104099296173  
0.9909952699659073 0.7270484366207165 0.5599147130867181  
0.9895258723139654 0.5726624874810102 0.5688357689996949  
0.9003267329886208 0.2355931040844855 0.0887844305680626  
0.4957938213475368 0.7381578487992062 0.1143134934556218  
0.392197707764982 0.0687287323884819 0.6047280650601902  
0.2965911226997909 0.1610788515910277 0.6284324030972449  
0.5950441363475611 0.6486234200047243 0.1284900838874693  
0.7982477907557420 0.1508816483184715 0.0727886842861805  
0.0983371518190253 0.6486468507395586 0.5807203673296016  
0.2990357383911384 0.2800563680528316 0.5404795041245409  
0.6125720576222033 0.5268060889590266 0.0482779244377607  
0.7882843413740415 0.0311598267113202 0.1628320995684399  
0.0944585889082607 0.7709898037965784 0.6628223552020941  
0.0951869036851026 0.5238432122714408 0.6588462204492079  
0.7824130442029615 0.2716305977792597 0.1549116191245235  
0.6160354791149395 0.7689475428820947 0.0473057005421201  
0.2720180146840734 0.0407867092842340 0.5436539231497396  
0.3309174912789736 0.2568390181391220 0.3492632257070016  
0.5692323563401254 0.5629579584464131 0.8639786084211831  
0.8230432943796143 0.0542734940547543 0.3566406454070152  
0.0729902219868529 0.743922798883115 0.8589379328859953  
0.0696823635490488 0.5615561816131962 0.8495081822076809  
0.8347575675863379 0.2416064918744641 0.3341762305118176  
0.5727774213011719 0.7354548996502760 0.8611193959431054  
0.3259811722248715 0.0597428380467398 0.3604972498924002  
0.3992462772193034 0.1539912318256003 0.2745102996226492  
0.4858177210294974 0.6428693874304358 0.7630725184245288  
0.9042281119604995 0.1478145827697942 0.4289816343617772  
0.9906360849356909 0.6510057075042099 0.9338653524390232  
0.4726004637588381 0.5852187602571168 0.5724929941063746  
0.3940720773858132 0.6855319298559860 0.6041430853466685  
0.5000314654172023 0.6969092051664325 0.4826687331830767  
0.2357594295529264 0.6573306772227445 0.5448340714270959  
0.5857540809593883 0.6556104704544141 0.6200202413192425  
0.3371527539258347 0.5865039643712041 0.4680090355806642  
0.6238502002568463 0.4716729520882565 0.3022900154494832  
0.2742023221117328 0.3394630545894852 0.7987618540552348  
0.1272335206429294 0.8254227986035610 0.4066975493142831  
0.7723415436785431 0.9726239952271912 0.9004970965317779  
0.7739714376163868 0.3283740937253002 0.9011085700104955  
0.1253099377562400 0.4748922054167612 0.4051636327067048  
0.2800817587689995 0.9805477203519299 0.7952986246144013  
0.6257954435701970 0.8269737241395654 0.2903774914569512  
0.5222393107510320 0.4342433410437528 0.4616774158674869  
0.3803319445935374 0.3650799664715410 0.9524393218133432  
0.0244962204116931 0.8613077792234679 0.2552007675647610  
0.8776042571692548 0.9353399450562448 0.7521859737904307  
0.8769203885003111 0.3652679953903157 0.7515294155339531  
0.0241080692862220 0.4364707549557639 0.2530831529302096  
0.3696706343503284 0.9325256672403075 0.9566453030371288  
0.5259620613530581 0.8688493848840575 0.4441990232166165  
0.4749903324563538 0.4417509255073603 0.6771150058001133  
0.4367711505974110 0.3490730106506663 0.1625642382754312  
0.9712719735148029 0.8516443298529494 0.0381185898924167  
0.9270667733814129 0.9477494597897840 0.5348848184398260  
0.9268529031152578 0.3491312561841886 0.5336724209264156  
0.9701506563340724 0.4487243750167976 0.0358487795155783  
0.4225882949756258 0.9522489069705543 0.1710706568263619  
0.4764063351342718 0.8415981257710888 0.6570721571645118  
0.3230959215497921 0.4526996143684374 0.6468322179337244  
0.5874431558502373 0.3498846752814549 0.1511126986950339  
0.8184137983550287 0.8519361872514080 0.0458609550984877  
0.0811475917747830 0.9491732501810498 0.5484912527857931  
0.0827211345124605 0.3500254170309446 0.5484427086608271  
0.8157985609060284 0.4491141279032612 0.0500431228975951  
0.5776576534311759 0.9514896291486924 0.1500365055186132  
0.3230940179684518 0.8542902644369100 0.6570789606413089  
0.2672158596793021 0.4328531026464874 0.4242986170074637  
0.6306747710725964 0.3654867472463165 0.9328303771429878  
0.7674792098507673 0.8661656267974438 0.2639440264336660  
0.1339836231335662 0.9333634676512248 0.7707420064630642



0.1268792160417024 0.3646995435586857 0.7747081656206268  
0.7672330528022211 0.4309956773814310 0.2706665257127055  
0.6250712682849241 0.9368758286447177 0.9225739189429395  
0.2709215519007284 0.8651347812916602 0.4380725235785237  
0.4050433641170282 0.4676486167042706 0.3214839685030916  
0.5001580041285799 0.3176838700153061 0.8275842765580592  
0.8997521783446529 0.8269271568532088 0.3771843410901585  
0.0006849945281105 0.9725695251182156 0.8807121215557909  
0.9964166650220779 0.3242562901521501 0.8832402099170563  
0.9003488977182138 0.4715919560786059 0.3786984829620000  
0.4921130593779305 0.9581067937326249 0.8186462586106836  
0.4014714891381999 0.8287247457995798 0.3234883339618085  
0.6261178317504135 0.2267896454435013 0.2892368694150273  
0.1193800495579732 0.0713399091654851 0.4084075973624744  
0.7771649275686249 0.7286348695512630 0.9155083143717022  
0.7740131701410637 0.5721177760980828 0.9185217443931746  
0.1285073838604077 0.2265398686617068 0.4149465466727738  
0.2726461292262305 0.7269055174414856 0.7864663733257110  
0.6206357876228564 0.0729632389803177 0.2909758792616332  
0.5230897003275626 0.2730100552482772 0.4512215348012319  
0.3795193011027722 0.5216956352426118 0.9523634838839892  
0.0151133279208791 0.0188200679471134 0.2583608255181147  
0.8803877134870923 0.7776976142023239 0.7607981004103470  
0.8773246682519534 0.5227893199925968 0.7621936631123314  
0.0267555562364621 0.2779865800373073 0.2631911111337602  
0.3645751678881312 0.7757105090557093 0.9434281448494259  
0.5182332106206295 0.0238557429208585 0.4403175538553179  
0.4844454386204984 0.2184204812017317 0.6575236686409957  
0.4197520708935621 0.5695126563645411 0.1561661246101717  
0.9779138578934556 0.0702530532821922 0.0532179423440799  
0.9107601120378975 0.7265937070989972 0.5496403995972705  
0.9098646336155173 0.5730647007705826 0.5524016645330687  
0.9785203078723037 0.2267747650835232 0.0610998079411202  
0.4184803725550078 0.7276687110059782 0.1461605858358918  
0.4680925108545054 0.0633164870141340 0.6453323808767284  
0.3269552138773901 0.2370978504326033 0.6359528583946491  
0.5764172565280238 0.5691915653634412 0.1380042500582742  
0.8191649200920212 0.0717733819939221 0.0673231445616038  
0.0706116960109904 0.7266117590833395 0.5667862332656529  
0.0692631118012683 0.5708857364623386 0.5675855905716545  
0.8211088851496642 0.2294970708539182 0.0677199901653258  
0.5749468034024445 0.7279425001539717 0.1327730436481217  
0.3141308516157349 0.0809274808628938 0.6295721908946755  
0.2717824847125282 0.2794610645433006 0.4247412549622686  
0.6259118173221695 0.5228437163688300 0.9270180142208218  
0.7679577267948549 0.0229733653440611 0.2810152397714893  
0.1244880807653360 0.7749926203468274 0.7772093501870476  
0.1216760985086416 0.5219375451146804 0.7763839010003746  
0.7715527058619506 0.2741791514047933 0.2768304993043623  
0.6270168832806314 0.7760902727931177 0.9251456364350692  
0.2661858670602267 0.0250127737421373 0.4231640977588891  
0.4037873577023249 0.2315849173678545 0.3134662656573732  
0.4939795098048833 0.5700444074430365 0.8211784384093839  
0.89815212541110415 0.0696979835956005 0.3933930831390466  
0.9975318797446137 0.7285720248668243 0.8954763735289435  
0.9957830244721709 0.5736340525452663 0.8930567141835656  
0.9041968924626796 0.2257600927060003 0.3911216273810688  
0.3978666823516908 0.0759711601518704 0.3113773023737286

Structure CH4/16vv S=8/2

1.0000000000000000  
20.1473007202000005 0.0000000000000000 0.0000000000000000  
0.0000000000000000 19.7681999206999990 0.0000000000000000  
0.0000000000000000 0.0000000000000000 13.2308998108000004  
Al O Si Fe H C  
2 198 94 2 10 1  
Direct  
0.4740972044111048 0.5711448099784693 0.5826402547693369  
0.6955684757506730 0.7366592867868698 0.6329706195899738  
0.9099305299796171 0.4684380579512224 0.1158399143982904  
0.3931889049062295 0.3325721964268916 0.6122828387761697  
0.4026401223468791 0.8245397317509728 0.2020895776477642  
0.8906040538065699 0.9751555519729488 0.7001155204269678  
0.8918410541990532 0.3242292834949978 0.6790808837853661  
0.4073501913295612 0.4780724475506852 0.1976756893046197  
0.3935914048632568 0.9667713997247630 0.6113782958379754  
0.9013527768830881 0.8231273481203927 0.1089139989589790  
0.7940058926494019 0.4531657226108552 0.2059290718039719  
0.5101302395301482 0.3361688007530417 0.6972171599570299  
0.2923742051584859 0.8315224757189043 0.0938085758438338  
0.0023865686494289 0.9678044892419261 0.5930842545851963  
0.0066760093308023 0.3289524023079858 0.5859684768091031  
0.2981207501533106 0.4618545118831696 0.0873337458575071  
0.5031041415678389 0.9758834838935219 0.7200585285447905  
0.7939850949673808 0.8410721838428937 0.2173869805852818  
0.8027837290150062 0.5183511738424830 0.0309934337634894  
0.4946001198841272 0.2807289678624713 0.5145690056678357  
0.2940045410778633 0.7575709585130920 0.2601482067447357  
0.9969833338715239 0.0415316778505626 0.7601739746890407  
0.9950963154785416 0.2562451687154675 0.7546535443268220  
0.2963762726188576 0.5390324406595246 0.2538371777846274  
0.4887009416475508 0.0524368499939444 0.5588040423141903

0.7921110635570093 0.7531440884748430 0.0642918524333356  
0.8203519777665612 0.3839379515215104 0.04174004862311110  
0.4865875607022560 0.4154441982406273 0.5424192593199929  
0.2992484302908510 0.8921629449960328 0.2717624661571860  
0.9957458051586077 0.9073589410236788 0.7705992566306469  
0.9931260449628655 0.3908215097991208 0.7613996944584380  
0.3045816350399701 0.4059231078217764 0.2687117127563415  
0.509099056888918 0.9211908442962805 0.5365464170893277  
0.7964497670502495 0.8846852741691476 0.0278887852719640  
0.7093862004284643 0.4705282483853815 0.3501970175994581  
0.6029302869013446 0.3299565630487173 0.8329017980422135  
0.2234429384704607 0.8577365774897183 0.9293496738098821  
0.0697353224774258 0.9363318046079069 0.4286634896459777  
0.0767988593759105 0.3600649431764246 0.4256078366593724  
0.2206994665542266 0.4409153380750676 0.9285455246549341  
0.5651556000726808 0.9517248297539097 0.8912162176853065  
0.7222586810913629 0.8651949399961922 0.3809339324539668  
0.7281698292611012 0.3461220741367765 0.2807819629286344  
0.5926156708026146 0.4425030622255005 0.7229487757032729  
0.2131425978098665 0.9394928074590102 0.0902977585766978  
0.0755448921095068 0.8560381194760076 0.5916180544697877  
0.0818625605335742 0.4403863808945044 0.5879911558694554  
0.2142363997455929 0.3567363666138264 0.0868402280983310  
0.5462651418812420 0.8531592763092242 0.7539593568265587  
0.7184843986532043 0.9517203346079743 0.2282147656511593  
0.6659648308345196 0.4346828437663748 0.1658487784441620  
0.6340928539913260 0.3295237444733888 0.6386084144112436  
0.1607401515035286 0.8189898448492362 0.0974515929307840  
0.1352381827871409 0.9737071245238269 0.5942503294551099  
0.1377616192536817 0.3207753415731722 0.5938553195586957  
0.1697024322311738 0.4814013892786669 0.1056052540833381  
0.6343532868344629 0.9539617515434442 0.7262014573310659  
0.6629355918381835 0.8318316508142081 0.2075107031119872  
0.6733872093018872 0.5309049809633455 0.5177895283210281  
0.6256403962959072 0.2636413981544375 -0.0026544347579422  
0.1803735899575478 0.7752369354132085 0.7881799271383836  
0.1090288728566546 0.0205014931910939 0.2868701219057163  
0.1061624309720495 0.2770793575778073 0.2788127696241746  
0.1796958231905754 0.5192160971538422 0.7805036735176418  
0.6150768983425637 0.0261737667567578 0.0385179159167165  
0.6810630662917676 0.7691804804497919 0.509009609056011  
0.5979631716564571 0.4330099323560645 0.4378196245570430  
0.7137609230443664 0.3550128480202573 0.9328729568510330  
0.0966951004256112 0.8614738211979904 0.8796333170121804  
0.1957722879753360 0.9369210379063037 0.3745210136626660  
0.2012888681702271 0.3528502369956582 0.3630493420989923  
0.0947805913011035 0.4353289367688996 0.8715964366437583  
0.6938820409227505 0.9422631188023137 0.9385732838642360  
0.5934301072835844 0.8543532494568508 0.4199201625924033  
0.7146599807219746 0.4044031336793449 0.5242745497131565  
0.5982706642176350 0.3957992342793403 0.0059919078303240  
0.1873873312586870 0.9062612990257496 0.7502827141328977  
0.1038853315856623 0.8891241688907633 0.2479829066744364  
0.1085945624634334 0.4099307930704182 0.2482189521280675  
0.1893847670951479 0.3864951766280457 0.7520994716067697  
0.5994432030417952 0.8935531548151110 0.0593215276935821  
0.6764681513341532 0.8930087187824021 0.5636333975741107  
0.5156084796174637 0.5366121940576647 0.4741013929180548  
0.8066840477123098 0.2610316493448479 0.9712520678346303  
0.0142532141115289 0.7745319737591898 0.7968944027682480  
0.2837970681632739 0.0239361601557033 0.2999927644485365  
0.2986981771149929 0.2732248305846630 0.2978626520780956  
0.0043690948006915 0.5214977530001039 0.8022479373452750  
0.7827010993000343 0.0185897520823737 0.0314413136936501  
0.5050070524600320 0.7878204432373066 0.5282056843176249  
0.4790708402644564 0.4345961929458872 0.34971151754355308  
0.8322657786519522 0.3637031308295509 0.8471522562281164  
0.9720236851172412 0.8520529668994924 0.9464945075406583  
0.3178053894694763 0.9437415787997565 0.4516024907026365  
0.3201073188358092 0.3555047886369502 0.4504095853687305  
0.9712370521374284 0.4340497484643334 0.9448606633210862  
0.8171088820591660 0.9565365522326197 0.8644944956862078  
0.4656044207021772 0.8600996674616253 0.3707647616096265  
0.5337794023764522 0.4340384139997864 0.1698403337261485  
0.7614611366383206 0.3408685795808710 0.6841662298644515  
0.0304514781306976 0.8180286687479444 0.1187801920240445  
0.2648947227738913 0.9757280296024629 0.6278618048784614  
0.2662415328693031 0.3170130021508569 0.6248651960096093  
0.0398620067640286 0.4710268479774565 0.1028216417864056  
0.763452484479087 0.9477914943417561 0.6844266430753878  
0.5318899504135478 0.8313693549246548 0.2024973080836300  
0.4383151935552072 0.3485903232628379 0.2072402361712730  
0.8424020437793043 0.4480161795389391 0.6926933710603862  
0.9729150966014977 0.9371067963687766 0.1027245863083209  
0.3217928252471694 0.8552349519805004 0.6040412750024842  
0.3141409383468542 0.4406532791566877 0.6071681388457730  
0.9767103231107045 0.3534195057376451 0.1081144264971793  
0.8495590932645526 0.8533015750684625 0.7428259021446357  
0.4618529130434484 0.9448106662078724 0.2161728010310577  
0.5937584457235685 0.5244951621456013 0.0636329295320945  
0.7245451846214462 0.2701717172273121 0.5252242230945769  
0.1052116108377176 0.7538430418783458 0.2460323735432963

0.1832851670677658 0.0417413912988107 0.7466703921036825  
0.1869880200029991 0.25139255058807329 0.7446919721561980  
0.0952755183990156 0.5445097483537810 0.2403885944444916  
0.6862524683833416 0.0268926131126537 0.5794289869701843  
0.6007940147526808 0.7579107461467381 0.0758716650875134  
0.9010875457559913 0.2426882923055846 0.1126563141568935  
0.3921207927271070 0.5503396106073808 0.5953320138384472  
0.3975717056836734 0.0607970832888093 0.2078871448844583  
0.8981212629830427 0.7306954301052726 0.7214788886475636  
0.8961681335268904 0.5697841761253557 0.7062090756562751  
0.4045767781668287 0.2217821474351221 0.1986439827828020  
0.3925477122415120 0.7411453229524056 0.6105767830899195  
0.8989338924676784 0.0453966428967235 0.1231110339978731  
0.7748297802111219 0.2478541561023613 0.1643698531193506  
0.5195945088200046 0.5537307323650297 0.6886537016345856  
0.2895300972623912 0.0483522049951474 0.1011939998713933  
0.0024010127266700 0.7441219651910724 0.6021226915775065  
0.0052324171429676 0.5490835327030547 0.6041450085869934  
0.2931210613799145 0.24881544402566174 0.1000377843905761  
0.5054241597799358 0.7293442719078046 0.7075806570386520  
0.7864013106909298 0.0665514940477893 0.2182196318463074  
0.8193181732906766 0.1432526805815548 0.0593200363021628  
0.4840765967664250 0.6561702727232900 0.5377527020913947  
0.2988227773411287 0.1479698813631185 0.2355484720646333  
-0.0001915232965319 0.6475803464524476 0.7428175722547358  
0.7228717502111820 0.2185519052214300 0.3406669666100053  
0.5717872428228200 0.5337870384677746 0.8676579005530052  
0.2173053394637449 0.0257944148900398 0.9377057379576578  
0.0738699759557448 0.7710647621132498 0.4384864004928992  
0.0724512160319439 0.5261814337393119 0.4354907592448163  
0.2186968575726640 0.2686886849974322 0.9367899287811521  
0.5651387820408631 0.7541551265984882 0.8839324335220508  
0.7206551614505264 0.0364988782878438 0.3859556015563425  
0.6438950380516245 0.2610167785706317 0.1944062456799517  
0.6517179532186924 0.5595022296867148 0.7148427716707894  
0.1582490334764836 0.0602082934756020 0.1093184041871386  
0.1344530356596620 0.7366528643652270 0.6084284206308738  
0.1364874137620187 0.5622662171902740 0.6017544652460005  
0.1623317563760213 0.2340213705381892 0.1095937724340868  
0.6350355643902516 0.7567780554718547 0.7163211070570593  
0.6539298385329828 0.0681472913592842 0.2211011387361723  
0.6870844188765644 0.1446267256024305 0.4974284542811969  
0.5971331400054657 0.6424320172557725 0.9820850601600407  
0.1906571250061424 0.1473467029091945 0.8672478246727844  
0.0888371845372750 0.6490109332587687 0.3643360779816673  
0.6094726090460119 0.2456884792685858 0.4343664906125613  
0.6923997913255618 0.5523701635491586 0.9368836093518529  
0.0935634060900255 0.0579895568209320 0.8936285133954279  
0.1945180242529042 0.7294228036140958 0.3881909253583030  
0.1914940732503153 0.5653053940568606 0.3714537683013260  
0.0945036959959933 0.2397486024825715 0.8862445848078212  
0.6920528222571637 0.7304210106514011 0.9359447296140407  
0.5957527638909544 0.0548259840282281 0.4385125775838544  
0.5092120824849167 0.1570733752758609 0.4420294641583158  
0.7910243699664353 0.6408668042780120 0.9559908549749775  
0.9964662893597005 0.1495187794643050 0.8752695912432238  
0.2970901877682481 0.6461311678131627 0.3691530783239576  
0.5046552388282010 0.2607544896929092 0.318624198457196  
0.8020391974330715 0.5333189526481374 0.8347117509626421  
0.9729064822705060 0.0298138878532651 0.9576543806862814  
0.3121675810636197 0.7657801100712598 0.4571439197554762  
0.3017010582983579 0.5227163932828337 0.4535415374324515  
0.9749913142035033 0.2707910018817706 0.9514526606425353  
0.8122030057174306 0.7585129153879326 0.8674626038303842  
0.4769872485815740 0.0367827607649386 0.3620773862342448  
0.5213218906749870 0.2587445067170182 0.1217679156704095  
0.7748507498588076 0.5577929581924458 0.6408126706688919  
0.0283213836048936 0.0568213252522955 0.1363314276649357  
0.2638608673637782 0.7377686981373430 0.6408199222933049  
0.2653461305573370 0.5621089033011718 0.638153598656031  
0.0310859340423719 0.2325617474928982 0.1251467351697241  
0.7748821462353075 0.7516266063415393 0.6724544374698467  
0.5258292469659448 0.0594238160981688 0.1785717141129084  
0.5998254013278902 0.1523690108668594 0.0921565886383563  
0.6919017440126425 0.6523705262902267 0.5830317849416101  
0.1017145848993916 0.1477038384663443 0.2323710451855759  
0.1881038907732653 0.6480041080378411 0.7340025264724386  
0.6061836233224039 0.6524536471068574 0.4141613812234491  
0.5012225427103413 0.6991351427944561 0.3271975362921084  
0.7075381446433435 0.7173613043042673 0.3151329649811421  
0.4199738047443058 0.5925452938383414 0.3589187719909521  
0.7897975991873989 0.6554776962610391 0.4391155520394524  
0.5404233843441667 0.5760207249635055 0.2764576983466158  
0.8311690923140432 0.4564432219370845 0.0974138273389451  
0.4713988381855173 0.3407713106297375 0.5897399546707593  
0.3224070656380576 0.8264780002783818 0.2078114209396830  
0.9709442950957309 0.9725618492524761 0.7064120109371642  
0.9716798323866166 0.3247224142637350 0.6964342927550614  
0.3262244656747514 0.4706133039516168 0.2020255084009829  
0.4728668286266385 0.9781799359077636 0.6063226491946541  
0.8210865251064575 0.8255133800699892 0.1036366840605972  
0.7238089267034584 0.4256627919623439 0.2500127497435746

0.5848689123620128 0.3611054096821871 0.7240512842374772  
0.2224806060623156 0.8619030601936861 0.0516291811432026  
0.0707463939899168 0.9337394234758665 0.5511790952286337  
0.0758529497820656 0.3626878504637986 0.5475591948950411  
0.2253795653925601 0.4348135593093270 0.0502518397732535  
0.5625952785807440 0.9324836378612933 0.7721005972698820  
0.7243389852620876 0.8721453444692290 0.2588595757396809  
0.6733208293960051 0.4591725830975922 0.4582534328550534  
0.6355762351809316 0.3363978039132253 0.9431209066540543  
0.1716851049543907 0.8501476203941398 0.8358571766016208  
0.1198911751405162 0.9455584675888138 0.3334350398320002  
0.1240596859438713 0.3498865259571571 0.3277349636677721  
0.1709540069058759 0.4454960712041260 0.8319641566006356  
0.6189539389240156 0.9536852283027299 0.9821338997756374  
0.6678482760188963 0.8454373233063595 0.4661317257436056  
0.5206906286215768 0.4560882218479677 0.4489508218561061  
0.7922853544947898 0.3404522711104088 0.9469359619285810  
0.0195031391185880 0.8489982648836780 0.8478260923461781  
0.2739033642234450 0.9495015828904960 0.3496907530187614  
0.2808262402260026 0.3467178427706169 0.3449223264746550  
0.0164915691751698 0.4454246051474988 0.8449180156282682  
0.7722579269156217 0.9505359348094260 0.9655635240163788  
0.5177159674996987 0.8556787815095397 0.4639454102264802  
0.4657513451998357 0.4243722391242040 0.2306167360316760  
0.8316416034523684 0.3694213042587381 0.7250440875754225  
0.9690247908974229 0.8582990831477294 0.0686954359383228  
0.3243485502807927 0.9347499511513886 0.5730866578544491  
0.3231948112379570 0.3626623478843141 0.5726758133577280  
0.9743704295244678 0.4310054350528567 0.0675588401618818  
0.8294681213488380 0.9324342305507748 0.7486370037464591  
0.4657355720428090 0.8654392600963723 0.2479981031782250  
0.5985288692038693 0.4468422995342695 0.1019934825543828  
0.7083294611885056 0.3364052194954901 0.5927076569505166  
0.1002677108834534 0.8216957897310618 0.1782068173257012  
0.1926012001921613 0.9734230246285446 0.6804769609366614  
0.1950117609160142 0.3203947311246437 0.6799285276367697  
0.1037381501642508 0.4755093870283684 0.1754406888404068  
0.6900396226960054 0.9556247610886995 0.6388143937247081  
0.5982023402002561 0.8297025939094568 0.1349495501663867  
0.8259293753485100 0.2237791821809778 0.0774417982748968  
0.3179795444843612 0.0697527551596660 0.2119765991589147  
0.9778039241704939 0.7247889652157548 0.7165431722730031  
0.9764615577121836 0.5712873065373604 0.7144251966893732  
0.3240312830032231 0.2237445187236714 0.2078666211321310  
0.4717609518860676 0.7285449391243820 0.5954236957291796  
0.8224332918864892 0.0681409581740967 0.1078480777437391  
0.7176140865927855 0.2684162477683260 0.2433981839713614  
0.5812617580968928 0.5226296403632761 0.7465902256208177  
0.2195452218806101 0.0186688539448186 0.0598808741640564  
0.0715640465521847 0.7767977432991973 0.5609677895158657  
0.0741213381614950 0.5195634188137910 0.5578720556930824  
0.2222857787087802 0.2769950760587750 0.0587264378034683  
0.5639791926335482 0.7729133283244782 0.7637159657837157  
0.7200615809101089 0.0306242565334058 0.2634496467674617  
0.6853098921102154 0.2196728791231525 0.4495740395802282  
0.6143579706689987 0.5639736204099621 0.9608152238083436  
0.1705978656956131 0.0684744359513040 0.8604528022046459  
0.1162306118189934 0.7258118931135611 0.3589830996823593  
0.1123246922692326 0.5712535789880515 0.3527550972549224  
0.1721078279800186 0.2265182903367468 0.8585996216189203  
0.6143262893461201 0.7217504229500485 0.9676609178163575  
0.6722215056367655 0.0656636113166277 0.4745124114711937  
0.5297105292624185 0.2357482909982848 0.4282893472191333  
0.7718763660255664 0.5620602871326821 0.9395152218443658  
0.0151467711650047 0.0699576073453126 0.8716684560573807  
0.2735746336419814 0.7254249977327601 0.3685086423962179  
0.2711069180033248 0.5672895543571468 0.3630999270619117  
0.0157048708411848 0.2287335155491629 0.8659973756735772  
0.7711817475122140 0.7204930056773560 0.9554878303476125  
0.5180761988877796 0.0759887012855639 0.4500626304335149  
0.4677801850212681 0.2718651064074825 0.2115958060976009  
0.8284942022493677 0.5267743233652157 0.7199554632978106  
0.9687441814233237 0.0174789445567687 0.0794407224373364  
0.3225970655922699 0.7749314660743248 0.5787601989976676  
0.3206831726019468 0.5198784734063283 0.5743145300467181  
0.9708827210911533 0.2747419632144084 0.0744739993885561  
0.8315985359578881 0.7732853694163261 0.7500058967433502  
0.4660781668183455 0.0249556589886751 0.2416281201459328  
0.5972968043324864 0.2335589342283365 0.1026861284102611  
0.6971670933859307 0.5730415551719215 0.6166007863054787  
0.0990455493779361 0.0704117909409978 0.1911237948376155  
0.1920366765414568 0.7252120994374600 0.6929267222110959  
0.1931272838306123 0.5717431222005827 0.6887016914485969  
0.1002819405309653 0.2238391561536570 0.1865313872514730  
0.5984733285036439 0.0754442735848775 0.1326291861869920  
0.5181574915333204 0.6277515645946283 0.3846045703149127  
0.6859028454563443 0.6785260229926682 0.4337649547739777  
0.6737242130718875 0.7186096020878878 0.2623947112380277  
0.4224063066551813 0.5669227363527714 0.2955406010991889  
0.3852092304487577 0.627135556000076 0.3508213658249062  
0.8143475418000650 0.6568270291537242 0.5026937907076378  
0.8142664051432217 0.6805367374392985 0.3876512427112543

0.5428425256948239 0.6020836451441897 0.2137316945806221  
0.7118811946323629 0.6472263462834343 0.1439484682552028  
0.7090504132392810 0.5571576979685930 0.1361735789297746  
0.6638806189966141 0.5989799438766339 0.2328641833497133  
0.7528045902950519 0.5968767397213386 0.2365664737412231  
0.7092821084719582 0.6001941662456896 0.1874517365477169

Structure 17 S=10/2

1.0000000000000000  
20.1473052208877697 0.0000000000000000 0.0000000000000000  
0.0000000000000000 19.7681594983396742 0.0000000000000000  
0.0000000000000000 0.0000000000000000 13.2309279702280254

Al C Fe H O Si

2 1 2 10 198 94

Direct

0.2741098573983181 0.5686932148898446 0.7836426217508515  
0.4916951911895495 0.7277961578347941 0.8138954938615139  
0.4727419263257583 0.6405383519993458 0.3594663050452510  
0.3249706629736192 0.6284517324272899 0.5960294583686656  
0.4998303176233110 0.6725181700466368 0.6108490760630049  
0.5424884797769814 0.6947793762779847 0.4477442864701605  
0.1909674808435221 0.6648535640792904 0.5642218736221208  
0.2344164525003770 0.7056594596856609 0.4854093565936159  
0.6127695608966230 0.7055868978900045 0.7361748115684562  
0.6206328158228732 0.7133304496046944 0.6179012732570335  
0.2867865104814029 0.5691430184830309 0.4099241295036100  
0.4853058682303630 0.5975773662246928 0.4068087673263544  
0.5024209390866716 0.6518923444608865 0.2932214091513065  
0.4342037696910497 0.6758781723200030 0.3817916479153493  
0.3610141066830440 0.5947315585975311 0.4000171793190186  
0.7043389021591688 0.4735604178540245 0.3099178144809001  
0.1946269866312668 0.3326584543472971 0.8117354681707261  
0.2065049251819641 0.8192869662502087 0.3987725097639740  
0.6921236216411785 0.9741746004913125 0.8856824204522874  
0.6945422684722420 0.3231935747921528 0.8842659122682816  
0.2080205315445007 0.4818799327545870 0.3913544502251427  
0.1984349481209878 0.9717791369471821 0.8077657826047537  
0.7050313371721717 0.8177314026174974 0.3002122588464316  
0.5909947353821862 0.4652254249391531 0.4099999541370515  
0.3073174633644140 0.3410381130323367 0.9078370991357717  
0.0949817241536935 0.8316057854016389 0.2921639690376373  
0.8078856761519693 0.9707410612851259 0.7896090280951465  
0.8079430682077235 0.3303173164132976 0.7872349855217627  
0.0948929087028759 0.4687498725919425 0.2914067167145402  
0.3116843551084111 0.9818038114003874 0.9075744241538830  
0.5963138799733867 0.8395996696252472 0.4034778517740432  
0.5999600558380154 0.5398452825016199 0.2423867703542089  
0.3010956596995143 0.2764546401368861 0.7316305509444865  
0.0983567946851143 0.7578050035035447 0.4609298892730276  
0.7944844578914522 0.0390424347734023 0.9613291927874753  
0.8012464335317212 0.2584075027311124 0.9565834772411713  
0.1008368706315617 0.5452005111581519 0.4579228505872148  
0.2931643660279754 0.0527989024131410 0.7411820423849789  
0.5924186197326983 0.7568929221514865 0.2454733634461959  
0.6021222070431218 0.4047847189557007 0.2338348962474915  
0.2901732095187743 0.4123422457109912 0.7407972487200717  
0.1069149789662887 0.8930090049352578 0.4683969052378224  
0.7940580730689187 0.9036060186173247 0.9579069608589935  
0.7949495410370750 0.3931623392388847 0.9613497326922977  
0.1083930198502863 0.4109288672721505 0.4715231548908728  
0.3102500177403203 0.9201989596354071 0.7297434376722083  
0.6084092233408611 0.8898844417135904 0.2175595656577477  
0.5227672841540817 0.4447306709177702 0.5771232398539814  
0.3803544604817398 0.3506576842328109 0.0711913173791050  
0.0207442568878266 0.8565660166678394 0.1320956946329670  
0.8762161524484954 0.9385652623872464 0.6281894412463862  
0.8788856188298456 0.3619339864366741 0.6279445963668698  
0.0204550791388150 0.4415008917578583 0.1317592576180109  
0.3697122920385435 0.9425029229980911 0.0771608032651486  
0.5216331165640106 0.8638743298571990 0.5649119954869476  
0.5145169232339463 0.3548277946766537 0.4276933608674111  
0.3978751270576355 0.4401122296808652 0.9217590398597667  
0.0155520216269432 0.9399213850865665 0.2910093768441032  
0.8809194416087202 0.8572487453079223 0.7892891324567465  
0.8816571612580659 0.4428289075557667 0.7901346775606041  
0.0199763428940719 0.3577714955180609 0.2911988225962723  
0.3504130525865722 0.8558871612341409 0.9254833071299531  
0.5138881995600461 0.9431732832491717 0.4034078211852887  
0.4594326116751525 0.4738479588320219 0.4048343251081618  
0.4354544794272331 0.3137464927358593 0.8970856284532862  
0.9651544482497542 0.8176523473873910 0.3067582356639283  
0.9402000060203795 0.9751365320484242 0.7951982308431181  
0.9390867319134650 0.3236383306975969 0.7965582813866672  
0.9650081613964775 0.4788895599388472 0.3060522665088540  
0.4416412899296650 0.9538734125328804 0.9139584911846181  
0.4653539799600532 0.8215780887832475 0.3901446468645456  
0.4709373006315905 0.5123141722542032 0.7348399004050841  
0.4296946503829506 0.2726095729895125 0.2143003343683414  
0.9758521606295613 0.7777109689117327 0.9877866803240601  
0.9174049625967412 0.0232889792940444 0.4876616143191648  
0.9122532639726865 0.2731883463965277 0.4888410345987395  
0.9790111231212369 0.5229893483374228 0.9874694073755904

0.4125834408483934 0.0259110589025452 0.2157055237254859  
0.4844113024208905 0.7646089689286842 0.6916632474477020  
0.3955416891327003 0.4337274044351487 0.6222898132175603  
0.5097105128425452 0.3538120378816685 0.1124465394490883  
0.8945474251600217 0.8658573166003991 0.0763142272845134  
0.0016493579423324 0.9351405935506528 0.5699245555778669  
0.0031119851127669 0.3585903204720987 0.5623292105927455  
0.8942280730139311 0.4375115447147382 0.0754615831068005  
0.4963513905915619 0.9354689647286785 0.1366464581064238  
0.3956824859391146 0.8541286041654178 0.6162289588547492  
0.4881609419240394 0.3800918189222579 0.7412544784689402  
0.4240808730810343 0.4059860793893234 0.2403081327740864  
0.9903254493783846 0.9090935035996224 0.9539882519939730  
0.9050960498595922 0.8926713195740987 0.4467776088901946  
0.9055333701076498 0.4037179645530385 0.4448049391201450  
0.9893452809913021 0.3908233019267186 0.9536201140292058  
0.3975840094542173 0.8953764853278483 0.2564313079921683  
0.4860627521539472 0.8897938222552534 0.7528670048662482  
0.3101028876710796 0.5349455650958210 0.6678973863377641  
0.6013524614482320 0.2737027514709779 0.1940964327072598  
0.8106945213913890 0.7742885101975862 0.0044450365691032  
0.0899384125868504 0.0240195318600392 0.5001082670457142  
0.1000109691768108 0.2774413867116245 0.4980427064728472  
0.8052099204116796 0.5240007831308031 0.0032877896410537  
0.5859884015531486 0.0223273252536009 0.2061917812487127  
0.3038394699665350 0.7851341692154472 0.7157572903371185  
0.2730119695053411 0.4338869728214817 0.5477706067302286  
0.6343869409391009 0.3610164513812094 0.0519266832311987  
0.7689397958394050 0.8638657745388139 0.1402685727106789  
0.1232233192466830 0.9419659075015503 0.6495400414153693  
0.1210319359394397 0.3579832158361476 0.6518787907575172  
0.7687692447839330 0.4357018766182947 0.1433108031051881  
0.6124526283991822 0.9521976801218501 0.0426454706994672  
0.2679216464551877 0.8618158884371335 0.5637135860164758  
0.333207242736237 0.4446618909057392 0.3718188883350273  
0.5649802299728079 0.3315627046719185 0.8880637130492666  
0.8351479776698588 0.8317068174761546 0.3033590547734460  
0.0698080322653689 0.9713352078725845 0.8257175350031798  
0.0673930739823114 0.3212157819600430 0.8278914125107518  
0.8346179294849423 0.4662999464078326 0.3056935102380920  
0.5656992314141839 0.9702017260803871 0.8569148438909781  
0.3347614684577910 0.8300640192790992 0.4003249992004081  
0.2417232540993432 0.3516015050811708 0.3945034980526131  
0.6365999838880325 0.4443171474596845 0.8944498831025239  
0.7582557275391657 0.9407497400772141 0.3049221518081396  
0.1352119863030810 0.8552403245468299 0.8034333920124430  
0.1186049423345145 0.4432053627333927 0.8077739412582565  
0.7614310993921249 0.3538853900897270 0.3048185862842228  
0.6307291845542133 0.8566794144223137 0.9026762161100569  
0.2606684122140087 0.9431496029478730 0.4037576636560538  
0.3900027654933950 0.5361882560845062 0.2637300905558306  
0.5065035556193354 0.2484793535809746 0.7629065714624683  
0.8900431624509203 0.7580088476521754 0.4420664825634350  
0.9945705237232629 0.0445625179664731 0.9419170029045051  
0.9888171997899433 0.2552779057786920 0.9481897530602349  
0.8913782088623955 0.5391893651958944 0.4429793974335869  
0.4695048090559293 0.0251233453634835 0.7520108212399155  
0.3907373917427318 0.7590815358705038 0.2589911505151202  
0.7040922235949916 0.2329156006101089 0.3074921873269372  
0.1904477924306647 0.5563228951602497 0.7870881574610137  
0.1956588417454560 0.0586351439816568 0.3864373235723503  
0.6968588112777132 0.7415485014495150 0.9108100643106914  
0.6938575009639180 0.5642069522376835 0.9084689400147727  
0.2078457014383991 0.2248773072520296 0.4055900044863081  
0.1899256643627298 0.7333336836812435 0.7858715846173155  
0.6978721970286027 0.0592974084096934 0.3028049439550144  
0.5863361194176566 0.2462417187263496 0.3906719955351250  
0.3153688294466774 0.5436438230786229 0.8894834988923803  
0.0789795588060122 0.0568586716410615 0.3042502366948014  
0.8085652598095134 0.7455051128680076 0.8076860265243562  
0.8059569853869978 0.5527703986856209 0.8065742106893010  
0.0958381597102291 0.2476101615586656 0.3028375908928700  
0.2973412430371432 0.7356420500360611 0.9016572414130826  
0.5850219171668841 0.0564735946744510 0.4014222879434358  
0.6059625851532371 0.1486495812937872 0.2569233417485525  
0.2904542871188325 0.6531709626538809 0.7422500192963826  
0.1041569390790360 0.1496892803458664 0.4430025580100282  
0.790959856536002 0.6497615644200472 0.9458035365985884  
0.5269767701587881 0.2569728003576473 0.5660010749438379  
0.3712328220464889 0.5271637338892604 0.0684535287767516  
0.0168616457533701 0.0243609125068748 0.1354991372470534  
0.8736696073677042 0.7702934922657771 0.6384194750172137  
0.8753514862275640 0.5289351752625434 0.6392323903970357  
0.0209969583537168 0.2703725868470432 0.1402426395367418  
0.3640759429442078 0.7639189360385149 0.0675177441777610  
0.5132819333055822 0.0230382480411396 0.5637236884504198  
0.4531894502936437 0.2373572308057038 0.4041159518802565  
0.4461138256697987 0.5640074256836447 0.9147166662030460  
0.9471863873407202 0.0549945584486384 0.2977258537475849  
0.9414382596953230 0.7385047835986029 0.8021177235814927  
0.9376489053554771 0.5639103916718933 0.8062205946402711  
0.9643488280702472 0.2368212102871238 0.3128784299772995

0.4300175307045468 0.7500756750961654 0.8955651039340673  
0.4536711190222198 0.0629163616618870 0.3977913369138349  
0.4992602535753869 0.1394466563040796 0.6556161190019674  
0.3911051566954347 0.6467232591559969 0.1537237907510151  
0.0008624177669765 0.1487602944686756 0.0660249753784513  
0.8828907406818516 0.6491814162759632 0.5549906514818741  
0.4058850113380887 0.2342380824138266 0.6323923287701249  
0.4907870152377224 0.5569880042099622 0.1368023971282161  
0.8983425915323965 0.0647398532400710 0.0759132519170934  
0.9892862093416896 0.7280428595922528 0.5651405269011884  
0.9906946974859014 0.5726525880987865 0.5625119397634193  
0.8983983456718104 0.2331530480453756 0.0894577294913960  
0.4882164529910994 0.7370018492464598 0.1257119509390101  
0.3918589108445991 0.0691651180183163 0.6066164629001893  
0.2953125818210323 0.1604811266411919 0.6270395119444854  
0.5878356135047945 0.6484426442311498 0.1275488973569084  
0.7955132193520894 0.1492515128694243 0.0729362212760595  
0.0983849261021121 0.6507333164190394 0.5780713407462736  
0.2996886112420303 0.2770301524666892 0.5326138892949199  
0.6026109625068466 0.5272438812434128 0.0427733867844049  
0.7862553366659627 0.0287795727523904 0.1611701644146116  
0.0955158176736346 0.7734031584668474 0.6597269782284245  
0.0960584696394942 0.525740775659701 0.6561618943831748  
0.7804314421559817 0.2707153912075876 0.1530069309765321  
0.6055192629556434 0.7708049998568272 0.0492559585830280  
0.2722760217764090 0.0388750294401951 0.54475569989093344  
0.3286020923799920 0.2561002030061125 0.3399871914920468  
0.5702830994311824 0.5568170153431773 0.8511906150925976  
0.8221057749863515 0.0534337378331526 0.3537344650256558  
0.0681757640877557 0.7439077291756616 0.8526694341214111  
0.0660430535028251 0.5622398890123493 0.8453884735142038  
0.8332587034509755 0.2424885991923272 0.3329098534522603  
0.5717873351772648 0.7396488769588482 0.8587669815042474  
0.3246791285930563 0.0565751261331179 0.3604490516797119  
0.3977018221963849 0.1511193084214558 0.2748467175782687  
0.4858918989226773 0.6438805159963897 0.7666855738739906  
0.9020135054269033 0.1477297213956996 0.4268457715705621  
0.9896438404148374 0.6510961775526668 0.9358352061076506  
0.5124024065203172 0.5960891420179250 0.5661705033056917  
0.3998909953173143 0.6712251050078806 0.5862372763137825  
0.5386195253669186 0.7218924560527293 0.5095552446204097  
0.2366545142727580 0.6793814926201907 0.5477492313176288  
0.6103145775954195 0.6810198953426941 0.6716052332877523  
0.3232243920835329 0.5906683501497371 0.4465628271328013  
0.6241985541327049 0.4709729565727822 0.2983260542738433  
0.2736777541570382 0.3403132070787100 0.7963929985208877  
0.1260438927643247 0.8258927696705364 0.4053509200932725  
0.7716440011667174 0.9720350138412689 0.8997222867841997  
0.7743683872786605 0.3258143174399752 0.8988228121479718  
0.1270749789007676 0.4762290234237874 0.4035607410067203  
0.2778233175595284 0.9809966503362754 0.7961149485374867  
0.624993369984569 0.8260506403705414 0.2906463141831816  
0.5224376617365606 0.4346369546965628 0.4558669286403968  
0.3802730459530053 0.3622001627174029 0.9497024229005256  
0.0237340880192519 0.8617284099595587 0.2539608229766581  
0.8761109345258253 0.9353409945426137 0.7504329167380203  
0.8768529399505673 0.3650321398082452 0.7498895000640079  
0.0246094443502359 0.4362190123703748 0.2535394009058779  
0.3687075233670409 0.9329674565839310 0.9557948940588881  
0.5241799136557499 0.8651162497352617 0.4428110905820830  
0.4701103232584578 0.4436247159608621 0.6697974900706132  
0.4356323234044543 0.3455937914368954 0.1597171687786806  
0.9701261077702643 0.8525352735226878 0.0366929455857418  
0.9254354419824227 0.9474038870163269 0.5323414760681107  
0.9256612347158510 0.3491301553184615 0.5304379004278412  
0.9703293263664420 0.4481990902167586 0.0359443983775575  
0.4201749509399604 0.9497942043589876 0.1717124714068640  
0.4718010395625487 0.8421070305086662 0.6553682685629315  
0.3187019269089313 0.4535987869481612 0.6439726908351796  
0.5868496455653291 0.3483727399055639 0.1484953012419925  
0.8174941153440225 0.8515828597379350 0.0447543072376726  
0.0798542302702349 0.9490383318317541 0.5474864185434296  
0.0825935461107610 0.3509988672594958 0.5454714041474953  
0.816188887542735 0.4478090691990748 0.0460517919529565  
0.5753549786858508 0.9497625688101639 0.1509572345745145  
0.3197879020790605 0.8549996670191403 0.6574114497201994  
0.2646058066472174 0.4271594752355760 0.4266604171129771  
0.6321480736751476 0.3656509393051675 0.9293207610732985  
0.7667850512003620 0.8640500377943711 0.2627664776641925  
0.1313722268318748 0.9345506269534009 0.7709776460678381  
0.1250986013574491 0.3647954035730288 0.7739492539403734  
0.7672221912506281 0.4317214783861527 0.2658713035165932  
0.6246897506591421 0.9371415866312947 0.9235270639726513  
0.2680425881458677 0.8654256221037732 0.4411253709907895  
0.4028229725540943 0.4637675076336492 0.3193713549154006  
0.4989003112737537 0.3197697254157850 0.8221587810915858  
0.8989340316529461 0.8261813850408096 0.3757273280635117  
0.9983548515851990 0.9739559361936968 0.8799623281455680  
0.9960596770237525 0.3240875391707086 0.8829352017858270  
0.8993165720970820 0.4711451147420422 0.3761663228284026  
0.4906380718520241 0.9592972158598767 0.8174345765379532  
0.3978407339428877 0.8276467029240233 0.3249350525939052

0.6246584850408928 0.2258774436618531 0.2872518465675584  
0.1177298575897700 0.0718263250959232 0.4094530609950172  
0.7756643388088811 0.7281202897633066 0.9174587306178019  
0.7735170530844709 0.5721652116117861 0.9158984940375380  
0.1270748806704650 0.2257021648829792 0.4120886334380010  
0.2703536983392495 0.7277648720049849 0.7866335045503784  
0.6188444614506345 0.0709305134808487 0.2914362980399949  
0.5202591588885431 0.2739962826741797 0.4465335759590688  
0.3808117478262191 0.5193807781446304 0.9463862735325027  
0.0147224541352226 0.0190602315596958 0.2577891634139626  
0.8758100430452440 0.7776428670593374 0.7605409099885457  
0.8746975175959187 0.5223557198417726 0.7614044989529182  
0.0255333447388837 0.2779792742732266 0.2621714587239456  
0.3626014538669395 0.7755938811810497 0.9458253778018744  
0.5169280404723599 0.0211639686913142 0.4411281872148495  
0.4839409654994824 0.2196645103944640 0.6537869626425233  
0.4120212039875180 0.5678998932593269 0.1545012449726709  
0.9770470111688808 0.0710457834797204 0.0542956863132659  
0.9092134979000880 0.7263164273780932 0.5504412057595016  
0.9104721381565675 0.5724072562850071 0.5503628988534468  
0.9766068793829196 0.2267133728297145 0.0608564477801589  
0.4098209775286066 0.7263661947077865 0.1504700036024791  
0.4683563794057981 0.0643311297708350 0.6450244246824839  
0.3257902726041612 0.2365417595148394 0.6317624664507732  
0.5702824061269878 0.5685633745923058 0.1366327681542103  
0.8185617334125299 0.0706583954944718 0.0679308205550961  
0.0688783121008678 0.7282125674341597 0.5663603315830483  
0.0705320141892696 0.5725358093537257 0.5644647277987671  
0.8192804847766760 0.2276126731449790 0.0669802127282461  
0.5680641080075883 0.7279271714907813 0.1363142746438654  
0.3136296142119172 0.0804242533258272 0.6301770636857233  
0.2702482180670178 0.2759745139722103 0.4184080785498308  
0.6251977193015884 0.5232050721105574 0.9245486218526965  
0.7666890426643923 0.0206912147546511 0.2798686972905360  
0.1221145575331723 0.7764297610913161 0.7762831771154985  
0.1195109818668846 0.5225392671260707 0.7751972017399271  
0.7700433064278347 0.2747111214216942 0.2749921776108978  
0.6249020484984462 0.7766934140482677 0.9297748298402252  
0.2642057198915360 0.0243119182008085 0.4242577111795705  
0.4022346851914114 0.2294008277015504 0.3093504375633607  
0.4941135960470568 0.5689917507108958 0.8155643515509458  
0.8968622499629071 0.0695228808725147 0.3913856460111850  
0.9939736482364853 0.7281862607978857 0.8944755223005012  
0.9934256783653639 0.5738974981813589 0.8939587071691075  
0.9024847829274627 0.2258249040727896 0.3899073308804333  
0.3968939338969283 0.0732218295862603 0.3124737600998111

Structure TS reaction CH4/16→17 S=8/2

1.0000000000000000  
20.1473052208878016 0.0000000000000000 0.0000000000000000  
0.0000000000000000 19.7681594983396991 0.0000000000000000  
0.0000000000000000 0.0000000000000000 13.2309279702280005

Al C Fe H O Si

2 1 2 10 198 94

Selective dynamics

Direct

0.2743689742212112 0.5685762579865141 0.7808932850906061 F F F  
0.4915129363456785 0.7279880637603711 0.8151886706845417 F F F  
0.4457582614622366 0.6438441387889452 0.3800861986588091 T T T  
0.3321085495870705 0.6274518292981695 0.5979887937190717 T T T  
0.5001013745027503 0.6696367747060989 0.6179487292208743 T T T  
0.5261615661111821 0.6886105624819252 0.4490749377380393 T T T  
0.1964014762271057 0.6644302934037182 0.5731664401275498 T T T  
0.2353101988434552 0.7000695496660255 0.4851154527644898 T T T  
0.6056415581226001 0.7036343579545125 0.7320193894975681 T T T  
0.6163776036304354 0.7135223869978942 0.6135685258501113 T T T  
0.3014489347709044 0.5808178471707208 0.4109590376631863 T T T  
0.4728191825565980 0.6069425647662118 0.4257866567597732 T T T  
0.4575738055804888 0.6447264971505632 0.3003111916833116 T T T  
0.4335196473272971 0.6924292879328771 0.4141240032062901 T T T  
0.3806295995019606 0.6147246035334727 0.4100504162885584 T T T  
0.7040134273249521 0.4748276745249456 0.3091177719345666 F F F  
0.1946952118618483 0.3309990617360654 0.8113886189033508 F F F  
0.2064959354647442 0.8190392108355127 0.3972643962754248 F F F  
0.6924667712961821 0.9727799546804974 0.8843034403953212 F F F  
0.6947686557514103 0.3228834691455660 0.8854423736949002 F F F  
0.2068137305199471 0.4821129912641950 0.3923955401946344 F F F  
0.1991384080709082 0.9715168910365080 0.8069797396218021 F F F  
0.7048428448369535 0.8175109940532508 0.2991837462717442 F F F  
0.5914748479934744 0.4659624437110921 0.4111156250025374 F F F  
0.3072607578078816 0.3397211650161509 0.9077244614328634 F F F  
0.0944438927421913 0.8307257695864365 0.2929043043028230 F F F  
0.8088249598044754 0.9714477588712143 0.7901235422166195 F F F  
0.8077575632565441 0.3305735255176714 0.7873388721393582 F F F  
0.0941881742276465 0.4689733094380557 0.2918275259803309 F F F  
0.3126825754363196 0.9824340035727701 0.9053057625866927 F F F  
0.5959659528330263 0.8370145871177925 0.4029229951296145 F F F  
0.5979105184229638 0.5406725822647473 0.2438512734890352 F F F  
0.3012017565639695 0.2745249181591589 0.7319908984980330 F F F  
0.0995657438412749 0.7569525741917573 0.4619921065925965 F F F  
0.7930790156531486 0.0393525315216507 0.9619709257874902 F F F  
0.8019157663286975 0.2584741336854108 0.9565926107391221 F F F



0.0997075487586869 0.5444995215795672 0.4591061848602394 F F F  
0.2931732806974239 0.0527014658507738 0.7385968681703545 F F F  
0.5921067853511559 0.7568056617086256 0.2428815185563522 F F F  
0.6017530464442515 0.4059035238574111 0.2342429186040178 F F F  
0.2901444166642975 0.4104130987443568 0.7395028305786298 F F F  
0.1071058868938479 0.8923510873095069 0.4686487005254207 F F F  
0.7950209884439730 0.9038655889732041 0.9578102412747924 F F F  
0.7951347179543262 0.3933107419989028 0.9613083324217868 F F F  
0.1075350270988338 0.4100710373258352 0.4709007288355664 F F F  
0.3106805188566213 0.9200809325516843 0.7277368286496610 F F F  
0.6078345520579447 0.8899258702343644 0.2181079935061305 F F F  
0.5238988296489495 0.443538605511721 0.5779542712213299 F F F  
0.3803974197220228 0.3526626768116898 0.0712495633089105 F F F  
0.0207731207519899 0.8560397067861913 0.1326266334338086 F F F  
0.8767186480704865 0.9387188524971961 0.6285305773097036 F F F  
0.8786751448689074 0.3618158726907268 0.6282095016990468 F F F  
0.0198443231566188 0.4425362334572256 0.1320375776984335 F F F  
0.3699148506376915 0.9425571108599584 0.0757153927340184 F F F  
0.5232318238531093 0.8624024375072992 0.5642408126008078 F F F  
0.5168620447231405 0.3544942938635813 0.4273891078024761 F F F  
0.3962975394596171 0.4399194548915517 0.9184194241846484 F F F  
0.0159619484996369 0.9398723442676911 0.2910110794117102 F F F  
0.8805612289578235 0.8572293841074341 0.7895591070757533 F F F  
0.8813666800414239 0.4431977324352303 0.7898965427095277 F F F  
0.0191097737441837 0.3580450523543277 0.2905423576147115 F F F  
0.3497416131392868 0.8562019287447526 0.9241963170885086 F F F  
0.5162833133419724 0.9432019005716867 0.4029774185049888 F F F  
0.4597655700279333 0.4730667097657317 0.4064748096140676 F F F  
0.4355644421896727 0.3137157765185705 0.8979159714915781 F F F  
0.9646606451953232 0.8178476218646793 0.3071765883570379 F F F  
0.9411986719607341 0.9746229638778772 0.7952053984007321 F F F  
0.9388676007146373 0.3239793907950315 0.7972074831091547 F F F  
0.9643705993873795 0.4792854350974025 0.3065891256109126 F F F  
0.4421598074239768 0.9531071425776361 0.9128761888249812 F F F  
0.4649152187464765 0.8227813549673400 0.3901581808708414 F F F  
0.4723171746623578 0.5115601145383266 0.7349794104196405 F F F  
0.4294140111961795 0.2712722552019571 0.2111678428484822 F F F  
0.9764602428766125 0.7773198581992276 0.9875826207396372 F F F  
0.9177994599029802 0.0238274786337911 0.4882687413240632 F F F  
0.9122599072501316 0.2731504990783336 0.4889917755453581 F F F  
0.9780863808389597 0.5236469117361295 0.9871425180842195 F F F  
0.4132787259641901 0.0267168644227880 0.2131422000968257 F F F  
0.4854162029363778 0.7650801687286233 0.6936842341725296 F F F  
0.3970851349202604 0.4309896410953655 0.6245394199478440 F F F  
0.5093493340388875 0.3549858942414872 0.1132021460504760 F F F  
0.894643995852771 0.8648304026347162 0.0769512004487822 F F F  
0.0020501421966514 0.9354397821865845 0.5695767847287883 F F F  
0.0030033604483464 0.3579439419993804 0.5635318104680351 F F F  
0.8936278526054053 0.4384530271311036 0.0761333729481706 F F F  
0.4967173966457423 0.9357874479982442 0.1347036265696460 F F F  
0.3972287073758451 0.8543927095772403 0.6152760083155471 F F F  
0.4911542505934818 0.3799277918690436 0.7438716697971586 F F F  
0.4232947768487634 0.4029388074518749 0.2452162015908215 F F F  
0.9900501484496473 0.9088103639952578 0.9548409113203249 F F F  
0.9050174571210761 0.89329579239395826 0.4468699448773350 F F F  
0.9057561899267483 0.4039202465015705 0.4456362093641744 F F F  
0.9885669917882751 0.3914237193316339 0.9543143657861819 F F F  
0.3982175758513407 0.8966391255119817 0.2557285345253035 F F F  
0.4879996807085547 0.8905191360690026 0.7515826861679997 F F F  
0.3136190031523114 0.53344944434536836 0.6695447643532460 F F F  
0.6005558608271713 0.2747112940327909 0.1957913334175601 F F F  
0.8100125144462567 0.7743489896621654 0.0048791282968494 F F F  
0.0908795843201773 0.0237388594693826 0.4995039879226368 F F F  
0.1001304296515357 0.2768569607182130 0.4995675783494491 F F F  
0.8037927278981698 0.5240578959231144 0.0039248401015612 F F F  
0.5865760914417706 0.0222878426411839 0.2048889623027748 F F F  
0.305855990969509 0.7848904738497353 0.7138620080981468 F F F  
0.2750601487498443 0.4345039621077760 0.5468517079445618 F F F  
0.6343706358552410 0.3611305670846932 0.0530886674161835 F F F  
0.7686065700038611 0.8645945227419105 0.1397462382345367 F F F  
0.1235561938550020 0.9418211643624375 0.6493183015680302 F F F  
0.1212072434918952 0.358588848771598 0.6521046956068730 F F F  
0.7679258045822834 0.4353108026218706 0.1431518373283467 F F F  
0.6133980941938333 0.9510615674348273 0.0421076588801625 F F F  
0.2697660362603500 0.8611755798282275 0.5611218036385139 F F F  
0.3325387114148342 0.4505658446476843 0.3695816848025544 F F F  
0.5654130633402019 0.3279785359147027 0.8905787868915880 F F F  
0.8348753637454820 0.8332932171754592 0.3028566477710157 F F F  
0.0706926529580159 0.9691837219607251 0.8265850596093358 F F F  
0.0672753494146647 0.3232577954675193 0.8282239066292476 F F F  
0.834276927757611 0.4647932755914397 0.3052711087327253 F F F  
0.5658308269262449 0.9721903356155792 0.8570805540639910 F F F  
0.3345022183395017 0.8282971476518526 0.3956976852080203 F F F  
0.2443419829393463 0.3534180350532594 0.3928752520436731 F F F  
0.6341599722491722 0.4428725545372032 0.8937712476714168 F F F  
0.7564844019926014 0.94121329833636070 0.3044403634952175 F F F  
0.1377052514668904 0.8541582746780136 0.8017027592752726 F F F  
0.1223764329020227 0.4438302042526985 0.8079886727962418 F F F  
0.7592344445438499 0.3538428122728021 0.3046935959285264 F F F  
0.6278278946719738 0.8567311745637625 0.8993189335954881 F F F  
0.2615973823512903 0.9422592219807910 0.4014538274443495 F F F  
0.3960331314829517 0.5349971754124070 0.2583268791667379 F F F

0.5055144820320265 0.2476567837546924 0.7630453607712298 F F F  
0.8882014816377861 0.7587752531650906 0.4416386487699739 F F F  
0.9961405510496206 0.0440975287970389 0.9414990305199780 F F F  
0.9896762749900887 0.2558445532767877 0.9482060022977734 F F F  
0.8889511442717435 0.5391331499371645 0.4422894270084186 F F F  
0.4689106783698449 0.0251356646926411 0.7508537859698947 F F F  
0.3943034033950568 0.7599907208698511 0.2545853267280762 F F F  
0.7043103642009996 0.2319530348136851 0.3057516338330259 F F F  
0.1902934792806192 0.5588321291792226 0.7777560380160651 F F F  
0.1957938782837019 0.0573537167707272 0.3837549908092726 F F F  
0.6982188474522886 0.7441904669836958 0.9041445832974375 F F F  
0.6941657422830119 0.5618102559094353 0.9021554650918020 F F F  
0.2083448907536152 0.2269145781361530 0.4047906336337022 F F F  
0.1911872540654826 0.7319510003426615 0.7800303665305393 F F F  
0.6980380449173680 0.0605987092312859 0.3014078743773609 F F F  
0.5875017249891457 0.2447872835329150 0.3919325798319946 F F F  
0.3114200431865299 0.5425085351865633 0.8900108258228414 F F F  
0.0781182388720012 0.0575568770125443 0.3044212177810550 F F F  
0.8125203970922570 0.7428509519221791 0.8088872790894044 F F F  
0.8088136781657269 0.5550995411572188 0.8078656117449725 F F F  
0.0956146465297181 0.2482254259170347 0.3039044908401749 F F F  
0.2968674468313424 0.7359957837578577 0.8996508293595795 F F F  
0.5851320041412009 0.0574869518380652 0.4000354388176390 F F F  
0.6054831748360883 0.1489584978665235 0.2545959948039069 F F F  
0.2939987329682836 0.6529346284218960 0.7409551061400776 F F F  
0.1061023250694291 0.1496223089585342 0.4428130624604876 F F F  
0.7879476532151344 0.6497642962413579 0.9483785284413955 F F F  
0.5269343166299549 0.2569159687395839 0.5660860692966097 F F F  
0.3705624684451436 0.5262262754485434 0.0664037848935095 F F F  
0.0165837469645282 0.0243296089236011 0.1355328108475646 F F F  
0.8746077385157918 0.7705606646222734 0.6382845151532663 F F F  
0.8747040317051074 0.5293536021313230 0.6387866343479160 F F F  
0.0216663866486471 0.2699832431930815 0.1404311047650495 F F F  
0.3637312366606906 0.7637631268398692 0.0659213835721957 F F F  
0.5136563760594015 0.0230470037270152 0.5627700531065614 F F F  
0.4544006640026055 0.2377911353027571 0.4022044602857235 F F F  
0.4422906453699369 0.5646038902225143 0.9119811673872888 F F F  
0.9463551788124107 0.0543242912424517 0.2974106283812006 F F F  
0.9453804204206762 0.7405065091160807 0.7996446403392454 F F F  
0.9408780836042183 0.5627944174764394 0.8030106345258616 F F F  
0.9641364631001892 0.2369444700227845 0.3126339833624883 F F F  
0.4297277831267436 0.7506030813408131 0.8955033657896436 F F F  
0.4536407476522157 0.0616537697633035 0.3964909310959612 F F F  
0.4992954325571688 0.1392076614635087 0.6547243388981130 F F F  
0.3933285955409076 0.6462823533635884 0.1492471161408133 F F F  
0.0013085254618375 0.1486685491532143 0.0649354102743374 F F F  
0.8813240409868541 0.6496161854078224 0.5538009263380275 F F F  
0.4057387360772040 0.2336335012059152 0.6309985828636400 F F F  
0.4926705093889083 0.5577833053280301 0.1271217603297785 F F F  
0.8986536369211748 0.0646275405901093 0.0730822057561724 F F F  
0.9888638316199660 0.7275840763112882 0.56109417041392326 F F F  
0.9890657188370042 0.5733650871515223 0.5595902657035126 F F F  
0.8991091357736636 0.2331683305976924 0.0892352359454094 F F F  
0.4896880158452532 0.7362963396044080 0.1192305987151698 F F F  
0.3919828075283505 0.0689658167344689 0.6044437099511413 F F F  
0.2951560038517869 0.1601125931542029 0.6236134370233586 F F F  
0.5903033295416051 0.6483023102063683 0.1257993915734232 F F F  
0.7960449292586489 0.1495227193911433 0.0735900959600855 F F F  
0.0972778064619959 0.6498574566938231 0.5800276652665630 F F F  
0.2996780048683263 0.2780365671693517 0.5327766340436142 F F F  
0.6079972955578015 0.5265134013688240 0.0451046254951422 F F F  
0.7876307080945821 0.0299003446452687 0.1618941106855232 F F F  
0.0932269861448134 0.7726524082029229 0.6607885407849636 F F F  
0.0914076490969649 0.5245441899565435 0.6575497476306396 F F F  
0.7812920952618683 0.2713470028559897 0.1528412557107401 F F F  
0.6079492207103812 0.7699367481223973 0.0465916076412185 F F F  
0.2725015809283207 0.0381883054450540 0.5422681149589721 F F F  
0.3296071765749957 0.2563999543264117 0.3403212252733425 F F F  
0.5685484121976572 0.5568703765539453 0.8569701601980810 F F F  
0.8216682905761274 0.0527744881410754 0.3553685783480063 F F F  
0.0711736218927328 0.7435470316311878 0.8555135438707282 F F F  
0.0684430741096378 0.5616214835452595 0.8489774953700504 F F F  
0.8330864585650133 0.2435069359628130 0.3333229815639740 F F F  
0.5728684981575469 0.7375320533277048 0.8566497713348085 F F F  
0.3248490716859394 0.0557822477952215 0.3579476614608410 F F F  
0.3979571043143864 0.1510339888040164 0.2749453321684996 F F F  
0.4862226344800646 0.6435570102264734 0.7684334976455176 F F F  
0.9016334793398428 0.1478673723659440 0.4260312142414620 F F F  
0.9898689276889954 0.6511590639869667 0.9338925016398250 F F F  
0.5169155480852714 0.5934357060885213 0.5768571190433924 T T T  
0.4117027536258023 0.6672925485656442 0.5949574321383153 T T T  
0.5284664692185804 0.7170611948466256 0.5100460114701025 T T T  
0.2406971721189607 0.6800570009481883 0.5520001251723738 T T T  
0.6015726574108899 0.6814487654937846 0.6651343412546155 T T T  
0.3368771475925553 0.5953196426894666 0.4563603530093521 T T T  
0.6237531561359475 0.4719645777475208 0.2989177659067863 F F F  
0.2737724360565892 0.3387501920026565 0.7960562715349297 F F F  
0.1261871733179873 0.8251542810786603 0.4056770549894395 F F F  
0.7718995041293795 0.9720706638775454 0.8997054782962408 F F F  
0.7746080580719479 0.3258175197227047 0.8991556844530848 F F F  
0.1263466569251435 0.4759462107220074 0.4041639669986452 F F F  
0.2783902359047801 0.9810160071194076 0.7941293477396130 F F F

0.6247566471302619 0.8253765984484929 0.2895397419005761 F F F  
 0.5231725670315299 0.4342568252596593 0.4564660932220335 F F F  
 0.3799051359339103 0.3621511492335685 0.9493574103634472 F F F  
 0.0236042371149381 0.8614886997374356 0.2544849070847590 F F F  
 0.8766897702126712 0.9354019618166021 0.7507439988395035 F F F  
 0.8767152172327215 0.3652740682341999 0.7500898098182844 F F F  
 0.0239752411557248 0.4366878985551708 0.2538068556405122 F F F  
 0.3689251230553836 0.9331147271037068 0.9543189912276375 F F F  
 0.5246949536385799 0.8651392101203186 0.4421330650650717 F F F  
 0.4716127280283615 0.4422326226716748 0.6710470883235402 F F F  
 0.4352378687881071 0.3455533522012644 0.1602634283956021 F F F  
 0.9702583150665873 0.8519327871188480 0.0371862799027198 F F F  
 0.9257841220072578 0.9477987529021874 0.5325288671691624 F F F  
 0.9256712575266590 0.3490227355326851 0.5309450236790099 F F F  
 0.9696787925725019 0.4490140322844667 0.0363457282261095 F F F  
 0.4205991725532385 0.9504094334146131 0.1699119952578982 F F F  
 0.4731142453761876 0.8420485356645742 0.6552348610869529 F F F  
 0.3202607565748607 0.4522676737190778 0.6442183425505448 F F F  
 0.5864112791922622 0.3492020135526701 0.1494752278013607 F F F  
 0.8175459661266942 0.8516301497564314 0.0448986364091866 F F F  
 0.0803364108954554 0.9488769723545687 0.5471234124171360 F F F  
 0.0824812398377688 0.3506737971056424 0.5461095555329223 F F F  
 0.8155901200060995 0.4479424972984489 0.0464341962964525 F F F  
 0.5757156719186085 0.9496367756495800 0.1500781121726646 F F F  
 0.3210397882004372 0.8549692383397556 0.6554970843685481 F F F  
 0.2653550120363448 0.4295555583758741 0.4257314987049341 F F F  
 0.6317940125714543 0.3643818867511541 0.9304277567038568 F F F  
 0.7661686493409334 0.8646784799150495 0.2622195168998971 F F F  
 0.1323674754129911 0.9336123667864342 0.7704856479421025 F F F  
 0.1260034145045381 0.3652187518380146 0.7740966591905973 F F F  
 0.7662333537065322 0.4315999254201941 0.2656732144817866 F F F  
 0.6244251807641774 0.9371337084966171 0.9223522027932063 F F F  
 0.2686428957419977 0.8644396888145494 0.4384961341711389 F F F  
 0.4038433424517791 0.4645358629566019 0.3193914598793768 F F F  
 0.4993847446353286 0.3185516033983973 0.8236221879606305 F F F  
 0.8983453133975132 0.8269214576793118 0.3756914711449824 F F F  
 0.9991689437310995 0.9731750155289589 0.8802522982851784 F F F  
 0.9960212805419530 0.3249356110736130 0.8833322434243840 F F F  
 0.8985857908071537 0.4709231972756172 0.3762781712817969 F F F  
 0.4911485981191248 0.9598711008331335 0.8165876706528792 F F F  
 0.3985343527654663 0.8279571740344025 0.3220695411111762 F F F  
 0.6246837683674116 0.2257327072669852 0.2869756111442143 F F F  
 0.1182701216297062 0.0716787637514344 0.4086610636774992 F F F  
 0.7762931606865138 0.7281625517848980 0.9169299891726723 F F F  
 0.7733224701375647 0.5721038968883954 0.9156240521910277 F F F  
 0.1276834668746574 0.2261827662365832 0.4125112808546589 F F F  
 0.1276846068096928 0.7273498326882759 0.7837122042888254 F F F  
 0.6189217870610264 0.0715037056096079 0.2898413000619016 F F F  
 0.5213153431574966 0.2736711641588556 0.4463647975577913 F F F  
 0.3779995437683539 0.5187096015150701 0.9442109908090686 F F F  
 0.0143452425098971 0.0190250688069256 0.2578038283942661 F F F  
 0.8780273266963476 0.7775978345477910 0.7603036690191587 F F F  
 0.8761127412861569 0.5227942219045829 0.7608906775751052 F F F  
 0.0254322297500025 0.2782097058871287 0.2623456990212816 F F F  
 0.3618191103518811 0.7759571397188338 0.9445221624227145 F F F  
 0.5176004204148441 0.0213592088726742 0.4401778164000092 F F F  
 0.4836712869714006 0.2193671168544711 0.6533183550695654 F F F  
 0.4139938787678616 0.5671096696074756 0.1489706085022817 F F F  
 0.9775724940741028 0.0709293204129793 0.0533397929185995 F F F  
 0.9086863125843649 0.7264263794021630 0.54906653811917312 F F F  
 0.9089475422397228 0.5727833048976834 0.5490331974426965 F F F  
 0.9773230872398315 0.2267482359400930 0.0605454139864250 F F F  
 0.4114376085085070 0.7261538882097938 0.1462549877457064 F F F  
 0.4682719665241706 0.0642339201082294 0.6437155323970245 F F F  
 0.3256362408269524 0.2361397386130477 0.6306299201257772 F F F  
 0.5720810897543203 0.5686631001663329 0.1352846985279257 F F F  
 0.8188231565441129 0.0708697169277599 0.0677786237432443 F F F  
 0.0684679254163285 0.7272563399131542 0.5663006640290931 F F F  
 0.0688248419885156 0.5721344376336006 0.5648300840408780 F F F  
 0.8199741422035842 0.2278398717076655 0.0670886308900904 F F F  
 0.5693703896886362 0.7274309903285427 0.1332625941414776 F F F  
 0.3136346428662620 0.0801348515426739 0.6274736893870099 F F F  
 0.2711714492434396 0.2774985131982675 0.4179096228369517 F F F  
 0.6256757984170207 0.5219134682841684 0.9250069281381670 F F F  
 0.7665668791277440 0.0210769797674430 0.2799779437989685 F F F  
 0.1232423559775313 0.7754522055854878 0.7753158737985544 F F F  
 0.1199042798500116 0.5228680630444700 0.7739596687175734 F F F  
 0.7697989969069496 0.2749029353668533 0.2746410496103735 F F F  
 0.6255625469496664 0.7766198246836424 0.9266138219565221 F F F  
 0.2644922559492571 0.0234144993963881 0.4218054676692091 F F F  
 0.4028283457585076 0.2294706109647464 0.3082845943742640 F F F  
 0.4932950720736144 0.5681345265347915 0.8169139448948073 F F F  
 0.8966203347841883 0.0694607863014980 0.3916347310338111 F F F  
 0.9960091626528396 0.7284496703750278 0.8940870924568145 F F F  
 0.9947322061904202 0.5736907890286815 0.8934172241532181 F F F  
 0.9023344349208458 0.2261122086472795 0.3897754521731400 F F F  
 0.3971631528675488 0.0729675302718036 0.3109796078947724 F F F

Structure 18 S=10/2  
 1.00000000000000  
 20.1473052208877697 0.0000000000000000 0.0000000000000000  
 0.0000000000000000 19.7681594983396742 0.0000000000000000

0.0000000000000000 0.0000000000000000 13.2309279702280254  
Al C Fe H O Si  
2 1 2 10 198 94  
Direct  
0.2745490371227712 0.5693765156003180 0.7832022220774260  
0.4912784819065496 0.7280127006202893 0.8146321522216211  
0.4712832313951147 0.6411554932695728 0.3567620517034534  
0.3217442044445373 0.6226895396104862 0.5883470677525352  
0.5102988702455916 0.6717348372412383 0.6175100411511809  
0.5530693698046747 0.6910933788546058 0.4556476119049242  
0.1916151178912400 0.6673330446069756 0.5673286816124146  
0.2348628042518796 0.7024912081894269 0.4837162039479139  
0.6135556999350681 0.7078644317614941 0.7452916531272020  
0.6281907285673094 0.7205615989931338 0.6294241255638549  
0.2763876311855392 0.5705688849473834 0.4250785322537354  
0.4980053072346471 0.5974926522968905 0.3853878079698161  
0.4973649885316238 0.6848063659184399 0.3266982457575925  
0.4146336380382160 0.6658162547544586 0.5006826714985934  
0.4173229264805532 0.6411792331727598 0.3578500762379881  
0.7042862467291104 0.4732939788191968 0.3105832699479708  
0.1942330224410725 0.3310914903076638 0.8119286288341979  
0.2061252865816460 0.8195031462124892 0.3979316855608362  
0.6917666054314695 0.9735314861730777 0.8842481960986701  
0.6943176186111879 0.3229419613858573 0.8853258790325010  
0.2067454493170534 0.4813449209246663 0.3926366005059619  
0.1987975399867989 0.9710719922215244 0.8063897841312234  
0.7045380968064900 0.8174876446787021 0.2989830627842313  
0.5908330937321518 0.4655364836673558 0.4104831196671108  
0.3069067228750926 0.3399236883865151 0.9089085151456543  
0.0947496057690100 0.8319477633942912 0.2909232684069507  
0.8079972953373469 0.9707936142502782 0.7894760838378262  
0.8071448740566056 0.3303365951414940 0.7871630105556154  
0.0946290524125380 0.4679758159567716 0.2903544676341523  
0.3116137110590992 0.9811548728429327 0.9072318967186573  
0.5959656931656123 0.8395952263402086 0.4025176729132517  
0.6000963110742858 0.5398310640047433 0.2426572062688918  
0.3009361664127543 0.2746948858889616 0.7329257373633628  
0.0975138099793381 0.7578829674417906 0.4590498930886461  
0.7934134529939632 0.0385683315221593 0.9615285604694017  
0.8010546114392333 0.2578153884861479 0.9560242622763960  
0.0989844439465740 0.5448234389598604 0.4562199055308597  
0.2934541888367625 0.0525296575390786 0.7410335599432436  
0.5912836882832648 0.7568399113915406 0.2454151749311314  
0.6020883356727773 0.4046429162168291 0.2346657523035843  
0.2900107914430697 0.4105605515863394 0.7414115629734922  
0.1065049832008058 0.8931501488712662 0.4670835159100589  
0.7935126221768010 0.9030180573629100 0.9571137614008747  
0.7951499518247662 0.3925791775296575 0.9620383786413583  
0.1060414733770353 0.4106354631619986 0.4708435663689552  
0.3113261949195521 0.9201165518337419 0.7289737285918213  
0.6078523214580187 0.8897562086838599 0.2164932371947145  
0.5229504468134678 0.4439586667989849 0.5776559733494583  
0.3802176535714971 0.3540139432165441 0.0716842686625507  
0.0203474498964193 0.8563027867718017 0.1312434108712086  
0.8760080160125326 0.9387802267782952 0.6276377340824355  
0.8779295176896346 0.3612272323068040 0.6274723085105709  
0.0202802369260190 0.4413712231943785 0.1306004996336573  
0.3693730163633811 0.9416186985370558 0.0770008234111412  
0.5225088654519463 0.8627637316108934 0.5643606207590537  
0.5151331156829153 0.3546359784301447 0.4281560797791632  
0.3958181895048733 0.4408208950358296 0.9180029807561695  
0.0146602281696271 0.9398656242310648 0.2899309573590512  
0.8808397629458131 0.8572985202903832 0.7886432841853297  
0.8813051497041428 0.4424802981220055 0.7893249049704462  
0.0189307651986778 0.3574846871791003 0.2899228402509866  
0.3485974734960064 0.8547574817728331 0.9258698512538797  
0.5129938263953042 0.9430597773441355 0.4035186269005056  
0.4593479796073814 0.4742354879422633 0.4065623869171406  
0.4351991762350136 0.3145823393306389 0.8983050782582876  
0.9648409156626658 0.8174984908468045 0.3060469007636520  
0.9403921446691524 0.9751597965313301 0.7943936627097292  
0.9382097115764154 0.3230044711754772 0.7962805583519633  
0.9646759594666989 0.4788358058493770 0.3046057448429840  
0.4411353964221433 0.9515865462994724 0.9133422129164425  
0.4650945932084563 0.8207632378171860 0.3907211654136418  
0.4701919983922520 0.5131245735364116 0.7318915742946329  
0.4278229942797973 0.2721973300010863 0.2117215551668720  
0.9767296589310392 0.7774100580603424 0.9861793245862537  
0.9179170341342395 0.0229353249877406 0.4866943932572661  
0.9120100430303009 0.2732819625813850 0.4877042324042844  
0.9791084664374414 0.5232278341619762 0.9864467215774384  
0.4115340832382619 0.0255300328200917 0.2156862034757833  
0.4854481636806808 0.7637823700922711 0.6914265315996531  
0.3956110941777848 0.4312563298135100 0.6233500237501441  
0.5091376792521528 0.3542906581487194 0.1135998568794566  
0.8943332106212863 0.8647914589978727 0.0749549313578620  
0.0014974535618321 0.9346070806979108 0.5697468508856025  
0.0027265159872784 0.3572303694387467 0.5649632383209117  
0.8938733987896040 0.4387223304337642 0.0755200979178021  
0.4960265891505375 0.9359867650766515 0.1357756684602688  
0.3966326839469905 0.8536901175446868 0.6152873827975208  
0.4895692213394643 0.3812928823976960 0.7440355553108319

0.4242793108631076 0.4046057532298447 0.2448602664911126  
0.9898150225007135 0.9089257901611275 0.9532943425177164  
0.9048215047169610 0.8922513615602181 0.4465601121264172  
0.9068508626494752 0.4042688416109143 0.4456838186206136  
0.9879190936222764 0.3910375568301305 0.9528167987392693  
0.3982295155058312 0.8947295260100812 0.2562574623301185  
0.4870124558958006 0.8885722869822212 0.7526747131596541  
0.3120974663852720 0.5331219282140142 0.6713649388884918  
0.6004978703576807 0.2735834902683548 0.1947772591082535  
0.8097850400487024 0.7737242473511802 0.0043565469071030  
0.0894323536724804 0.0239947988410667 0.5001604288769753  
0.0995451772866641 0.2770496472019455 0.4982736727458817  
0.8037682951509997 0.5237414616259920 0.0027256678323885  
0.5859071264089823 0.0222830734509420 0.2057277018226120  
0.3052670655750243 0.7851670443856252 0.7144709083429744  
0.2724269878807262 0.4335805765726443 0.5491759982732609  
0.6339246706037410 0.3609122477212612 0.0529094729927538  
0.7688928385882068 0.8639059182615761 0.1397831826517065  
0.1233703630634160 0.9412549190808382 0.6484719503023175  
0.1217366026144402 0.3581960423540414 0.6511674369415190  
0.7686472613290111 0.4358098424058937 0.1437883204837322  
0.6123219721191013 0.9523800541761649 0.0419727380463929  
0.2687616046769807 0.8622259644627703 0.5625566438469749  
0.3330270125348175 0.4442728966039324 0.3730420582950171  
0.5649549396337364 0.3296134439479012 0.8894608109686453  
0.8347315968229631 0.8314080090341993 0.3031375104009446  
0.0701042609227680 0.9695975073070605 0.8248587350587353  
0.0667110309169120 0.3232574521147785 0.8265569745263086  
0.8344388453211550 0.4656400920620896 0.3068350984434945  
0.5650236827446439 0.9704931518579309 0.8566107607801398  
0.3344645580476533 0.8289356740709046 0.3988291548023105  
0.2411843413923929 0.3520071608582716 0.3957734894440593  
0.6353246145279134 0.4434807636405866 0.8946120946830191  
0.7578488407779644 0.9404854864274066 0.3046495429655224  
0.1367463724796168 0.8541158880906253 0.8017210936439283  
0.1218128813110489 0.4438876350068394 0.8065087980783850  
0.7612469350264315 0.3534100582572862 0.3044881180800622  
0.6294114048666329 0.8566520184776304 0.9021668187293380  
0.2612070543819052 0.9427566890277194 0.4022162662939671  
0.3908936538241354 0.5346702884044672 0.2614137318304059  
0.5049812654081490 0.2488754993444402 0.7627211362688392  
0.8897387261852892 0.7576097917696413 0.4413337201392852  
0.9958340602434190 0.0441791512217393 0.9407410484662266  
0.9897234199774191 0.2555264824071052 0.9472846050257172  
0.8919432475190089 0.5395382434793061 0.4422120134610695  
0.4680199882272738 0.0235403528552188 0.7511084833309328  
0.3915904205095393 0.7584218096148406 0.2575719928481293  
0.7038984344270578 0.2325445772446831 0.3067265568826812  
0.1905243354469491 0.5590424270895263 0.7841525537971723  
0.1953225405590525 0.0579400046314769 0.3864941775800671  
0.6966198130709115 0.7421121772998109 0.9085035369798862  
0.6931859529743047 0.5634653861077927 0.9054246291761074  
0.2076013008550924 0.2250792195798670 0.4055273037821976  
0.1906694586937577 0.7319367229399170 0.7811576800278242  
0.6978708202289245 0.0591462643686614 0.3019823086232903  
0.5865285847650874 0.2457089610760437 0.3914317097393034  
0.3134167138514989 0.5455974513194100 0.8915758196315156  
0.0786338270647409 0.0564747131752939 0.3041954465092758  
0.8091539170242541 0.7451981570704275 0.8074132830825581  
0.8059779332378965 0.5526243721407884 0.8059306823132520  
0.0955832070690810 0.2477804899112103 0.3028626161278275  
0.2970692431250736 0.7337652145413931 0.8985306438814801  
0.5851359393724361 0.0556953482197495 0.4011142014480924  
0.6056408763772821 0.1484276642447505 0.2570400651498881  
0.2928965309918162 0.6527447313898592 0.7368837836447693  
0.1040790868315786 0.1495276741149179 0.4424344326980960  
0.7896512076906668 0.6494201776596179 0.9449092055559192  
0.5260275405027672 0.2559028512121896 0.5656690898215891  
0.3717895836588602 0.5263147160738555 0.0672768902425295  
0.0171082163713269 0.0245333508080706 0.1347990464955842  
0.8734558954064713 0.7703899357628888 0.6376412047275848  
0.8746756958204072 0.5285744632039707 0.6383249381241149  
0.0213718484082071 0.2697473921324602 0.1396150358888709  
0.3629738310703541 0.7621497261460739 0.0664678310971537  
0.5129608911588193 0.0232217311441747 0.5633746162794755  
0.453338248281478 0.2376957212879380 0.4019764167003916  
0.4443274446261717 0.5650117576540767 0.9116204504087697  
0.9467651558566244 0.0551718079289353 0.2965444609185107  
0.9421723727527529 0.7389218325684390 0.8004989108042295  
0.9376640435049209 0.5634357376414104 0.8049203433121385  
0.9641235130532195 0.2362714748094233 0.3119373277434964  
0.4291229623309161 0.7497992324357567 0.8947713477223990  
0.4537883145315829 0.0631953386941060 0.3967711932376862  
0.4986655740586642 0.1388796782844173 0.6577763949931082  
0.3920740476764277 0.6457193680027623 0.1518630560054249  
0.0005196094689451 0.1485753793369163 0.0643124086527874  
0.8823834294216386 0.6490815785093510 0.5549769371530358  
0.4050224168877215 0.2329284013535574 0.6315402217433594  
0.4913770029175865 0.5562222649773335 0.1342608720865729  
0.8986319551886360 0.0634955307690048 0.0733711804870836  
0.9889941711945219 0.7277872899372883 0.5642772529485426  
0.9902941180900532 0.5728220701410294 0.5640114146257189

0.8986930112287291 0.2336069391120086 0.0881795135685739  
0.4880987850153317 0.7372679642090570 0.1229315480621726  
0.3914581295337090 0.0691640213833141 0.6055335817659143  
0.2942125463196728 0.1597569665262861 0.6258609207710802  
0.5880211730697601 0.6483591824569573 0.1273921015353560  
0.7963809865224430 0.1488400477877417 0.0729184262630758  
0.0981498251270130 0.6505937120821831 0.5764249962657273  
0.2988010030662719 0.2770242944061377 0.5335440790644272  
0.6038898117728374 0.5274626238855148 0.0430519191825747  
0.7870441991092175 0.0284705641679130 0.1613566641969470  
0.0953463949646733 0.7733501310625689 0.6578169061566648  
0.0965574786722287 0.5254999296103533 0.6545288014965541  
0.7804972887270663 0.2703465637375750 0.1524264412587150  
0.6063375275510009 0.7705945259700583 0.0497659134467218  
0.2718667430764138 0.0375949259317647 0.5448638628501492  
0.3283063862925612 0.2564035189257071 0.3408227288486902  
0.5692281870963163 0.5558912471938505 0.8516195775038065  
0.8219242079718532 0.0529679354033418 0.3542027022104650  
0.0691662904544014 0.7432014832868232 0.85082747044425047  
0.0661536529111200 0.5615281629816667 0.8437468160788487  
0.8330363030415261 0.2418894076444309 0.3322394414836619  
0.5713567504414789 0.7390916284246791 0.8600631762697585  
0.3245115286089814 0.0567768090298655 0.3612260392323094  
0.3968787075485599 0.1511639930715291 0.2744428409812052  
0.4875216832897654 0.6439367420775023 0.7645705155601950  
0.9019254819869186 0.1475232667911484 0.4266318554064161  
0.9899966355834474 0.6509282582038133 0.9336655735774033  
0.5251538329407061 0.5963269492075934 0.5708043341780804  
0.4025296495288228 0.6689461045911210 0.5727499632231083  
0.5410829660395087 0.7207096512961699 0.5117511617222266  
0.2361957750338512 0.6860589258175733 0.5533178942208982  
0.6151753862113492 0.6859401780830237 0.6781591327071540  
0.3153732697335985 0.5862403568720279 0.4620664495447549  
0.6241186573833759 0.4709013965348717 0.2988572454328692  
0.2733931759399728 0.3387378243301962 0.7972965700135101  
0.1257036110452548 0.8259802327684923 0.4041781652544028  
0.7712819083027627 0.9716524997257296 0.8992210768855401  
0.7741494682889671 0.3255271834002689 0.8990968604630573  
0.1259909728091785 0.4756490451419479 0.4030693816397020  
0.2781729877528797 0.9805721009690151 0.7954502970795286  
0.6245386986498038 0.8260518228082728 0.2895647277292289  
0.5222834593748615 0.4345393097707286 0.4561648189173897  
0.3795771023128226 0.3631174312173207 0.9498170836209705  
0.0233148449857651 0.8616923892629936 0.2530687462527665  
0.8761683829846729 0.9354399694938095 0.749892833575975  
0.8761676093313074 0.3646098335782330 0.749425352322362  
0.0242541961977703 0.4359170511742360 0.2524056330785370  
0.3680061707860628 0.9317101474869977 0.9556983239565791  
0.5238838324429905 0.8651072927322435 0.4421573625851381  
0.4701166732874765 0.4429215573783741 0.6699193896915910  
0.4348846773491394 0.3464575604732572 0.1608871556618960  
0.9700528611345609 0.8520045275802210 0.0355704784500633  
0.9254015967632850 0.9471221479472794 0.5318250494828628  
0.9255977533088237 0.3488181910676438 0.5307824815578340  
0.9698937462119795 0.4486066452724111 0.0352756787819902  
0.4198193714000044 0.9495498668159642 0.1715038535786371  
0.4725420662625589 0.8414208462135685 0.6548154749427905  
0.3188421842825644 0.4519291163723575 0.6448888451719639  
0.5862041956517814 0.3483839807883701 0.1493994964449623  
0.8171351445802214 0.8511122151055123 0.0440544893368516  
0.0796276991488601 0.9487765941017420 0.5468687398474070  
0.0821252815167608 0.3505865241463617 0.5458177337174026  
0.8157377796394092 0.4478699616421257 0.0461941424751691  
0.5750336982311842 0.9499459481624642 0.1501666513385995  
0.3205381127822331 0.8551240914294695 0.6561358628981742  
0.2643020009383536 0.4277903502793380 0.4277345230655995  
0.6316361499198995 0.3648853636457807 0.9303156830220791  
0.7665379888250267 0.8638780264475475 0.2622428231638531  
0.1318943595423892 0.9334772890609692 0.7697585011400362  
0.1257744315011678 0.3651747699535201 0.7732265599574007  
0.7670883565891220 0.4314102367930782 0.2663285173315857  
0.6241488543679010 0.9372572635006263 0.9228134857004546  
0.2680754422648891 0.8650255842070308 0.4398703776741111  
0.4023481765504963 0.4643746184619941 0.3212828416150494  
0.4986457044404938 0.3197404458949370 0.8233240460052246  
0.8987117641963883 0.8258791731271455 0.3752341112702758  
0.9986931134514960 0.9734569212401489 0.8789739442860754  
0.9955875492203204 0.3245044347664455 0.8820425043315465  
0.8996519037148414 0.4711289575601307 0.3760720005302628  
0.4901215917844244 0.9583337378390602 0.8170600771032157  
0.3979084420130773 0.8267046864648235 0.3241119131612460  
0.6243551147927781 0.2256733064425145 0.2874672599428289  
0.1174316650476135 0.0715872138507780 0.4093296684063886  
0.7753650295173072 0.7278906297101323 0.9165295732596397  
0.7727582467294963 0.5717366261777168 0.9146983886908084  
0.1268835267600006 0.2257019045033860 0.4120010678645379  
0.2711411857661046 0.7268071545397055 0.7825613039085206  
0.6188052110891664 0.0707366857343285 0.2911421969345326  
0.5201147953073930 0.2737362174480027 0.4462738075581719  
0.3795007478980702 0.5199019057707384 0.9452730876778919  
0.0143888173876381 0.0190745108572842 0.2570428372644243  
0.8761332091545921 0.7776886402878209 0.7597660834779391

0.8745353445262957 0.5219843563324019 0.7605136664751763  
0.0252907525725187 0.2776912129210661 0.2615403414339533  
0.3612128274098371 0.7743861948954862 0.9450154419937526  
0.5166289767140494 0.0212354903521572 0.4407733273182090  
0.4830213009504175 0.2191100122260684 0.6539314894788796  
0.4126013515248484 0.5667020125565063 0.1537019254918830  
0.9774086548678301 0.0706854758820461 0.0528161034798281  
0.9089648664494464 0.7261154594479304 0.5498468263350929  
0.9102512470134753 0.5723635833632401 0.5501807588891644  
0.9769030624762808 0.2267213441912694 0.0596688910049655  
0.4098740376060810 0.7253230787622889 0.1489215765573122  
0.4676859074258403 0.0639415590706941 0.6449776638690098  
0.3249302846012760 0.2357350800441257 0.6317899148681028  
0.5705608336064560 0.5684338195570695 0.1366896449998618  
0.8188438764184161 0.0701218995391837 0.0674735507873492  
0.0686272699871133 0.7280001156128031 0.5646279907602370  
0.0701757349669098 0.5723975469299506 0.5634424590967150  
0.8195518202008070 0.2273770405354532 0.0664551765293403  
0.5677209444001741 0.7275600996834400 0.1358092181485161  
0.3131620213892150 0.0799136271560218 0.6295371611197972  
0.2698158628191959 0.2764689133021113 0.4189473147710933  
0.6248178334341442 0.5225023008346182 0.9243859852375815  
0.7667415573241398 0.0204474079391260 0.2797449728941241  
0.1229238420036316 0.7755236406793697 0.7738019659441663  
0.1204422185523702 0.5231177796400275 0.7733669227393025  
0.7698915857305020 0.2742926789344665 0.2743868402400319  
0.6248312994619205 0.7768142828691267 0.9302044429872931  
0.2640010553849065 0.0237896393507875 0.4240772921294483  
0.4015389775454204 0.2296803786232614 0.3082521465086567  
0.4936226127345942 0.5683594551292257 0.8143132717149187  
0.8968547498053205 0.0693693057943256 0.3908956763047138  
0.9948097279072700 0.7280225396589330 0.8926382524775499  
0.9936446116472707 0.5735929973089342 0.8923449660529943  
0.9023557700624049 0.2255620707701980 0.3892029383441604  
0.3964144661256089 0.0733656296961744 0.3122195791200380

Structure TS reaction CH4/16→18 S=8/2

1.0000000000000000  
20.1473052208878016 0.0000000000000000 0.0000000000000000  
0.0000000000000000 19.7681594983396991 0.0000000000000000  
0.0000000000000000 0.0000000000000000 13.2309279702280005

Al C Fe H O Si

2 1 2 10 198 94

Selective dynamics

Direct

0.2755113746428535 0.5699802517033632 0.7813287213772995 F F F  
0.4902541194291459 0.7278659495091304 0.8145605461630154 F F F  
0.4501019031218149 0.6462193115430116 0.3799107792552860 T T T  
0.3334884334267431 0.623220044664087 0.5904781856513680 T T T  
0.5067658019208655 0.6696064274571680 0.6197212730712481 T T T  
0.5474083681672927 0.6864755313933768 0.4575677822344682 T T T  
0.1985969453237492 0.6670812834391444 0.5736463845161891 T T T  
0.2379058827336628 0.7003855973956696 0.4847278435760654 T T T  
0.6039099268441360 0.7058775872597810 0.7394924852041893 T T T  
0.6174104587487738 0.7173076339462660 0.6211652654884470 T T T  
0.2775284974390950 0.5727551868447835 0.4384881256357734 T T T  
0.4773462728997393 0.5996656549352450 0.3956282565434787 T T T  
0.4781002843486933 0.6882082624680208 0.3481535336489963 T T T  
0.4298954487061997 0.6614025488779419 0.4846564663260494 T T T  
0.3997417868352198 0.6399605427717445 0.3519817763986345 T T T  
0.7041961618256209 0.4740782284960687 0.3102253756314255 F F F  
0.1944871239897594 0.3304749283160149 0.8114409147338719 F F F  
0.2061489969441723 0.8191391728041566 0.3972909496627608 F F F  
0.6920568557805069 0.9725148958703471 0.8835857227300821 F F F  
0.6944619786610957 0.3234037114170789 0.8855182990138957 F F F  
0.206554757895143 0.4822131352367833 0.3937840504457810 F F F  
0.1991067127722772 0.9712802560344755 0.8064855308245029 F F F  
0.7046587716564687 0.8174977449849052 0.2988889063474502 F F F  
0.5910726281539596 0.4660067493684608 0.4109981247532346 F F F  
0.3068469800814810 0.3392297500959458 0.9085977282967903 F F F  
0.0944509431946940 0.8312438668656554 0.2918462985782924 F F F  
0.8086693965396421 0.9713200589074305 0.7899790060923877 F F F  
0.8073115522189838 0.3304987288696424 0.7873019673238275 F F F  
0.0945180557137206 0.4683302268622214 0.2911202557783881 F F F  
0.3123674720247607 0.9819591717999785 0.9059696676252997 F F F  
0.5958600846357669 0.8377135491642491 0.4023762379275766 F F F  
0.5991502477463868 0.5405195787572978 0.2435109371679403 F F F  
0.3011225028859315 0.2737834702742319 0.7330840631239823 F F F  
0.0984003289693121 0.757233333942893 0.4603806985764933 F F F  
0.7925656199068669 0.0389092604178671 0.9620038656976746 F F F  
0.8012374920784779 0.2580671201943616 0.9562354124177830 F F F  
0.0987137837413528 0.5444656952676965 0.4577874901535850 F F F  
0.2934576008652456 0.0525492044469544 0.7392654302177419 F F F  
0.5918278021919079 0.7569643287926482 0.2428323026150281 F F F  
0.6018401635704862 0.4055610326374151 0.2345959870052070 F F F  
0.2902960879911092 0.4098799998646214 0.7401968873564044 F F F  
0.1067357033085159 0.8925890329271340 0.4677726623457730 F F F  
0.7943078650644821 0.9033719450089279 0.9573214107262515 F F F  
0.7953141809028494 0.3928625189260089 0.9618683283367986 F F F  
0.1064431220777990 0.4101519476530768 0.4707283686468458 F F F  
0.3110774699350287 0.9201167994776753 0.7281713843473483 F F F  
0.6078181960715554 0.8899201250087287 0.2171557717411261 F F F

0.5241265092099354 0.4432936103615219 0.5784376214501847 F F F  
0.3801974534758443 0.3540430716340026 0.0718996418294182 F F F  
0.0203795349543796 0.8559701563623960 0.1319607064225323 F F F  
0.8764051838250282 0.9387968284582939 0.6281042776953711 F F F  
0.8781886873402911 0.3613895645631615 0.6279035297575604 F F F  
0.0198963051415930 0.4423463293146668 0.1313599634628986 F F F  
0.3696795353135656 0.9420765310574026 0.0763372308292745 F F F  
0.5233291131894973 0.8622405228910495 0.5644420377288171 F F F  
0.5168606741910935 0.3542486644684786 0.4281170009402331 F F F  
0.3945007810664833 0.4406336710334315 0.9178630031466142 F F F  
0.0152105776597651 0.9398597374114672 0.2902905548484966 F F F  
0.8805151240397322 0.8572358902262067 0.7890923097229106 F F F  
0.8811606991518914 0.4428768573481889 0.7894938290095084 F F F  
0.0187878372488726 0.3578138820220289 0.2898767767015471 F F F  
0.3486659741842999 0.8555068531022272 0.9254327966822942 F F F  
0.5152839997907037 0.9431617161147940 0.4034134543651859 F F F  
0.4592794130378479 0.4730217825180887 0.4083637221672092 F F F  
0.4352400052362597 0.3146049687759245 0.8986941749461508 F F F  
0.9646376610044172 0.8176717633633288 0.3067310615833776 F F F  
0.9410935982821798 0.9747212751037324 0.7946335167355159 F F F  
0.9383932251790412 0.3235345080692582 0.7969991303200814 F F F  
0.9646167011142879 0.4792106618178593 0.3058667747558701 F F F  
0.4416787500805626 0.9518296573661971 0.9129204828054398 F F F  
0.4649099380206962 0.8221501347353808 0.3907502443325228 F F F  
0.4715336721827157 0.5121526519883446 0.7332468885249952 F F F  
0.4282670013263541 0.2718892195186555 0.2113222211282277 F F F  
0.9769766158148414 0.7772145929034053 0.9863868162268261 F F F  
0.9180210381810809 0.0234344592385654 0.4875131663120200 F F F  
0.9121627673457411 0.2732465574877452 0.4882755511227757 F F F  
0.9782898953903327 0.5236979957879768 0.9865576695294820 F F F  
0.4125518899680429 0.0265520160617640 0.2137145727495167 F F F  
0.4837601053003269 0.7640196437722651 0.6920164302736609 F F F  
0.3971014350006783 0.4299222638179643 0.6246326595669913 F F F  
0.5091703937644638 0.3547484337334694 0.1135167338327250 F F F  
0.8943451019076392 0.8641401998888298 0.0757525807628809 F F F  
0.0018041899562746 0.9349778110703753 0.5696090797323663 F F F  
0.0028457232147190 0.3573653366892486 0.5649230533617597 F F F  
0.8935000794888595 0.4391297059748993 0.0761586318994176 F F F  
0.4963957271149440 0.9359951696589093 0.1349359138733348 F F F  
0.3971236289230475 0.8550003024996116 0.6141851725913909 F F F  
0.4914410005766428 0.3807085166704098 0.7452600271337815 F F F  
0.4243661146547453 0.4037890445328571 0.2459496400164127 F F F  
0.9896332029313442 0.9088117033949530 0.9542875593032321 F F F  
0.9047960151821286 0.8928618867321916 0.4467039304021370 F F F  
0.9065815390358338 0.4042138908670481 0.4460077044216249 F F F  
0.9877914310333580 0.3914350261939603 0.9538743637591054 F F F  
0.3983826663317416 0.8963042013972782 0.2565165794035877 F F F  
0.4878297725410050 0.8888769683367386 0.7522555155625312 F F F  
0.3158937638973498 0.5332549169434415 0.6724831059923417 F F F  
0.6004657008672112 0.2744563211128721 0.1956530629501145 F F F  
0.808999235758185 0.7739264931399745 0.0046973447635850 F F F  
0.0902493469055088 0.0237647603361282 0.4997095364049500 F F F  
0.0997019517354119 0.2767810560009565 0.4992865267306072 F F F  
0.8028695223280167 0.5238041307030485 0.0034018825518629 F F F  
0.5865288520160803 0.0222856428977138 0.2045356971762189 F F F  
0.3067995827112711 0.7852725550622495 0.7133997959800524 F F F  
0.2746259965768729 0.4353939337438817 0.5483636622771755 F F F  
0.6340970280860887 0.3614231518278359 0.0532071139525598 F F F  
0.7686093981127513 0.8644778900070520 0.1396707522577429 F F F  
0.1235012268031639 0.9414008028271397 0.6488093751493480 F F F  
0.1216504412832364 0.3585723572736796 0.6516274512039786 F F F  
0.7680197855569304 0.4354212000931668 0.1436441459018454 F F F  
0.6128686662554159 0.9511184679133748 0.0414147575588473 F F F  
0.2693087425621812 0.8618102125531593 0.5612886451277035 F F F  
0.3324985311194979 0.4475556369268858 0.3699641722875313 F F F  
0.5652245283627266 0.3275037982991904 0.8910371380914768 F F F  
0.8347600383181231 0.8325827081199790 0.3027735566633325 F F F  
0.0706717582921783 0.9683282777729119 0.8260008706730133 F F F  
0.0669171931918058 0.3244200502507724 0.8273978953496837 F F F  
0.8344811662465190 0.4647067173402917 0.3059580760981149 F F F  
0.5652738623923241 0.9715959184808014 0.8563843437548542 F F F  
0.3343159216008189 0.8282830992923991 0.3965519780388647 F F F  
0.2427526225537591 0.3533467079387620 0.3956731497023185 F F F  
0.6329740691143044 0.4430757294368135 0.8934242275462196 F F F  
0.7569028684665042 0.9409379060816647 0.3045607478770833 F F F  
0.1385024845292619 0.8553380146525355 0.8009204987065317 F F F  
0.1240618902651818 0.4443419900628527 0.8070262598486622 F F F  
0.7599131093928122 0.3534631935603230 0.3046910662039366 F F F  
0.6274823955084443 0.8564031005705175 0.8990252542184862 F F F  
0.2614234651264482 0.9422440930709115 0.4010207162596231 F F F  
0.3956031643851574 0.5349078670519845 0.2601065964635367 F F F  
0.5045725325644241 0.2481256158872114 0.7631934144093577 F F F  
0.8885345760125176 0.7582795029858218 0.4413467886219991 F F F  
0.9965229161240643 0.0439647417393161 0.9408163535258325 F F F  
0.9901284820470053 0.2559050288201945 0.9476113222615083 F F F  
0.8899520147237965 0.5393611443116768 0.4420212155332308 F F F  
0.4678941013034432 0.0235522596830293 0.7502294792161095 F F F  
0.3937736758380979 0.7599665536118962 0.2549895656513712 F F F  
0.7041265608875307 0.2319681120129857 0.3059151316514601 F F F  
0.1911877377756142 0.5603187625574222 0.7783865459129231 F F F  
0.1955258344234139 0.0573716938834465 0.3846355603378413 F F F  
0.6974042237895759 0.7434627083206138 0.9032573265404693 F F F



0.6934139009215130 0.5619314928533825 0.9011677057370733 F F F  
0.2079900785074926 0.2264964322944323 0.4051703059993841 F F F  
0.1919366293444895 0.7310410727411067 0.7781911591882746 F F F  
0.6980174472823890 0.0601028344617021 0.3012560199356216 F F F  
0.5871695883691288 0.2445737028546162 0.3919293387310745 F F F  
0.311014714747349 0.5448411650037670 0.8922599165345986 F F F  
0.0781509405573644 0.0570889962754819 0.3042913136278216 F F F  
0.8119458481076052 0.7431878249307147 0.8084816349385093 F F F  
0.8080104733745941 0.5543791343825859 0.8071631098696699 F F F  
0.0955169854544593 0.2481462038446764 0.3036096919930102 F F F  
0.2968113150655611 0.7350396961516807 0.8981987419148183 F F F  
0.5851574523828518 0.0568547657519503 0.3999095555577981 F F F  
0.6055301273032541 0.1487330781710341 0.2548827456899829 F F F  
0.2972858945959374 0.6533110232171211 0.7376571059133923 F F F  
0.1054000326489799 0.1495266732722342 0.4425055116178669 F F F  
0.7876027379595030 0.6494545190506216 0.9472166236373525 F F F  
0.5264163954566854 0.2559358844040105 0.5661072721174563 F F F  
0.3712141999650953 0.5263193021898616 0.0676559173139921 F F F  
0.0167409224300457 0.0244642522138250 0.1350435081111101 F F F  
0.8740288982172117 0.7704861144215798 0.6378521609904411 F F F  
0.8742005366815278 0.5290030024639591 0.6383732179130632 F F F  
0.0216442610096692 0.2696983537205568 0.1399871723675972 F F F  
0.3630266106098929 0.7622490305438063 0.0660318157086550 F F F  
0.5134980825324078 0.0233865234442163 0.5627224634034036 F F F  
0.4540279264673330 0.2378256429837791 0.4019025665257701 F F F  
0.4420840397050156 0.5646786429152755 0.9117021884269008 F F F  
0.9463287497510748 0.0546784669199596 0.2967652919708428 F F F  
0.9449323629858597 0.7403113163728037 0.7991018568117738 F F F  
0.9400653998402362 0.5627399093849732 0.8029847782285913 F F F  
0.9640541366455935 0.2366097147880453 0.3121271629754290 F F F  
0.4293611233033161 0.7507594817308387 0.8957399008849336 F F F  
0.4537238975411171 0.062238328433705 0.3961568611485475 F F F  
0.4987635866228075 0.1387743794841896 0.6570807435267980 F F F  
0.3940649809031029 0.6459638437781550 0.1513145612103131 F F F  
0.0008571001796014 0.1485929394908538 0.0641342961126199 F F F  
0.8815689961575544 0.6493891013779418 0.5541298330726221 F F F  
0.4051897876071067 0.2328700777027990 0.6308981530986983 F F F  
0.4928271987044113 0.5568262552377874 0.1286977074321740 F F F  
0.8986762777090931 0.0638498068835958 0.0720574353399641 F F F  
0.9887631699463810 0.7277338107086280 0.5621342769791866 F F F  
0.9892159330093975 0.5727986205243525 0.5619112983884165 F F F  
0.8990044293999375 0.2335320702266088 0.0881992920832673 F F F  
0.4892794263645257 0.7370320707533153 0.1194762377130800 F F F  
0.3917028855039533 0.0689713053025613 0.6041644291948458 F F F  
0.2944762584791434 0.1596474071980296 0.6237852840163711 F F F  
0.5897024786664744 0.6483391900429467 0.1263079602513812 F F F  
0.7963880713494191 0.1491649721234793 0.0733544017963368 F F F  
0.0971871507468194 0.6499775691154355 0.5785420370671588 F F F  
0.2989416072506543 0.2777999708780143 0.5338914634305283 F F F  
0.6074176365116344 0.5271104448965147 0.0442247529871906 F F F  
0.7877983907614521 0.0287357476504084 0.1618845797606312 F F F  
0.0941451435770375 0.7727175687318137 0.6592613666835305 F F F  
0.0936053959549881 0.5249288086321258 0.6563488946639637 F F F  
0.7810589696770691 0.2708786792428057 0.1526054304795963 F F F  
0.6073203176481670 0.7694746564271568 0.0458909711549254 F F F  
0.2722036963554402 0.0374132294281040 0.5430295484186161 F F F  
0.3290257006442729 0.2569033749388510 0.3413384246941931 F F F  
0.5678579610768111 0.5575757318243930 0.8556119401256694 F F F  
0.8216973158625862 0.0527866962232224 0.3552682529402560 F F F  
0.0713071741429872 0.7431208087480741 0.8533814189677642 F F F  
0.0681303723593558 0.5612234087167920 0.8471087841932032 F F F  
0.8330155514543449 0.2426895894434082 0.3328524237545807 F F F  
0.5720325188005191 0.7374972333878276 0.8553572671017875 F F F  
0.3246748550658012 0.0560396208606520 0.3590619403450575 F F F  
0.397130337780302 0.1513360501107428 0.2749559833195221 F F F  
0.4839437826852446 0.6435280690171581 0.7661297684608215 F F F  
0.9018079685229594 0.1477033218620321 0.4262860142270384 F F F  
0.9901441940276285 0.6510422960002487 0.9327637927266679 F F F  
0.5269475321227380 0.5943913745303220 0.5784292702141264 T T T  
0.4185730952936433 0.6645764539385494 0.5698826612193539 T T T  
0.5352832307852415 0.7180227728629864 0.5111860823202219 T T T  
0.2421744456321433 0.6858147588366100 0.5549426805504443 T T T  
0.6026427819374742 0.6841410924218326 0.6713882564197359 T T T  
0.3205284688589533 0.5865228024748902 0.4656172404528355 T T T  
0.6239619917258352 0.4716080439033590 0.2991481735740749 F F F  
0.2736344291692419 0.3382256379601998 0.7967070728477097 F F F  
0.1258265670023988 0.8253541016576449 0.4048456431352250 F F F  
0.7715103351409311 0.9717628539808345 0.8993705180778448 F F F  
0.7742988243721030 0.3257342281307913 0.8992129262364017 F F F  
0.1259677372243573 0.4757536925886683 0.4038852982594534 F F F  
0.2784037027356590 0.9808545956463917 0.7945443423956178 F F F  
0.6246340886854611 0.8256771338876163 0.2891106231625855 F F F  
0.5229958755926560 0.4340567682313079 0.4568820494277546 F F F  
0.3792509216771833 0.3628007875289896 0.9499333977119022 F F F  
0.0233460205814993 0.8615327116268290 0.2537872246543955 F F F  
0.8765643444069937 0.9354295129762562 0.7503333892095299 F F F  
0.8763311940456120 0.3649369803579248 0.7498064176273971 F F F  
0.0241167911167324 0.4364184364140868 0.2531304316589953 F F F  
0.3684019499157500 0.9323769586955848 0.9550025164074185 F F F  
0.5244449424463085 0.8651124012434011 0.4421777183938076 F F F  
0.4715029692271600 0.4420310586344485 0.6710211008703624 F F F  
0.4349904207935822 0.3463245433270643 0.1609525967909988 F F F

0.9701039260263684 0.8516696414625216 0.0362976320120580 F F F  
 0.9256386251627333 0.9474867736811206 0.5321743098222029 F F F  
 0.9256945078566972 0.3488732758634256 0.5310852697187372 F F F  
 0.9695261924538485 0.4491647358039828 0.0359688362480384 F F F  
 0.4202707800280052 0.9502145063215792 0.1706334648448475 F F F  
 0.4726779309289739 0.8417212579059807 0.6545668764690191 F F F  
 0.3205653996807030 0.4520554683541960 0.6452894292240927 F F F  
 0.5862121908144502 0.3490468651411973 0.1496251729123514 F F F  
 0.8171142821070845 0.8512364634065293 0.0444005375139227 F F F  
 0.0800288064138215 0.9487138290862518 0.5468875565848350 F F F  
 0.0822684600940917 0.3505367841088756 0.5461931981837012 F F F  
 0.8153883584420853 0.4479517220288614 0.0465449047657458 F F F  
 0.5754309334540153 0.9497482950984306 0.1496118945399019 F F F  
 0.3209905947382552 0.8554663911720581 0.6550050626408250 F F F  
 0.2650866299301740 0.4294707882445152 0.4272059388656402 F F F  
 0.6313243355772258 0.3645928577877768 0.9305546249732046 F F F  
 0.7662611726013751 0.8644199759549309 0.2621393076548273 F F F  
 0.1325213298156456 0.9330308705739370 0.7699164005104819 F F F  
 0.1263293917831376 0.3655639978315293 0.7736081240993045 F F F  
 0.7665607666709704 0.4313379431864277 0.2661778055049666 F F F  
 0.6240301308766263 0.9369168974331288 0.9217840683760130 F F F  
 0.2682729012881850 0.8644883450641530 0.4385493837657322 F F F  
 0.4033615678501619 0.4646522634121908 0.3210245433065424 F F F  
 0.4990014822172384 0.3188392891968519 0.8242910099725407 F F F  
 0.8983845644079764 0.8264950278293881 0.3754371995609063 F F F  
 0.9991614437265781 0.9730132027995921 0.8795749512574389 F F F  
 0.9957731622083799 0.3250954488310285 0.8827737494766481 F F F  
 0.8991445552327662 0.4709764686180620 0.3762336381649831 F F F  
 0.4905253742269764 0.9587160993352353 0.8165103465979655 F F F  
 0.3983403619115293 0.8275781368849238 0.3229811642228881 F F F  
 0.6245139048170643 0.2256085652306083 0.2870718785332329 F F F  
 0.1178829607241667 0.0715512102134852 0.4088242047412862 F F F  
 0.7756742114997905 0.7278785000677175 0.9162772101706622 F F F  
 0.7726320887512159 0.5717664437268795 0.9148476357917730 F F F  
 0.1273181915860064 0.2260300243915552 0.4123844376204886 F F F  
 0.2725839097556175 0.7269112512324511 0.7814996121023654 F F F  
 0.6189269049616115 0.0712322004817665 0.2898093557205499 F F F  
 0.5209596205182478 0.2733465678751870 0.4465130687726244 F F F  
 0.3774633838780801 0.5194854130052349 0.9454120078744452 F F F  
 0.0142162971996527 0.0190536185249783 0.2572922243297597 F F F  
 0.8776644246409475 0.7776011264068288 0.7598757087819905 F F F  
 0.8755883676993577 0.5224359914155698 0.7605050717697779 F F F  
 0.0253162963893132 0.2779751470310785 0.2618880067747966 F F F  
 0.3610612850000194 0.7752078837801122 0.9448825858679584 F F F  
 0.5172825631687061 0.0214423875492642 0.4401271511325220 F F F  
 0.4830757740500573 0.2189651344894799 0.6538415616481572 F F F  
 0.4143100344263146 0.5668105729334485 0.151333725108836 F F F  
 0.9775972813253020 0.0707317881183940 0.0525923998504751 F F F  
 0.9086828794985493 0.7262773519043009 0.5491650715635359 F F F  
 0.9092038926640740 0.5725525816195187 0.5494048689212718 F F F  
 0.9772568103233610 0.2267767129786904 0.0598204839001681 F F F  
 0.4111908180434938 0.7257633151934826 0.1470838358408528 F F F  
 0.4678240302386314 0.0638838454407491 0.6440618071715534 F F F  
 0.3250884729523591 0.2356230129316828 0.6312518952390462 F F F  
 0.5720289562955543 0.5685230924921143 0.1356770547901363 F F F  
 0.8188541560234484 0.0704443810803994 0.0675083725729877 F F F  
 0.0684427194515678 0.7273767822825548 0.5653004493070171 F F F  
 0.0690730964534652 0.5721206039727207 0.5643421781202207 F F F  
 0.8198307924058881 0.2276242874456145 0.0666528622671620 F F F  
 0.5688447885191223 0.7274401208616581 0.1332571371882807 F F F  
 0.3133545135767761 0.0797845459814113 0.6277708361636485 F F F  
 0.2704355863724572 0.2775351291679371 0.4190056585329032 F F F  
 0.6247862042604098 0.5222693147100728 0.9241439956633499 F F F  
 0.7667021573140360 0.0208357007953808 0.2799497852565693 F F F  
 0.1240173107700002 0.7748734655460368 0.7738743702036004 F F F  
 0.1211166216181212 0.5234698245742209 0.7733342866966524 F F F  
 0.7698091683104522 0.2744911266902008 0.2744586153181174 F F F  
 0.6249693347472558 0.7763011977999810 0.9260582440407674 F F F  
 0.2642348063212765 0.0232910884488859 0.4223289949705418 F F F  
 0.4020525420533119 0.2298459932376957 0.3084075097849421 F F F  
 0.4923579063872552 0.5682064465677641 0.8159491922003994 F F F  
 0.8967244714919360 0.0694089107338201 0.3913211166179948 F F F  
 0.9962195548241652 0.7282905742919681 0.8927650848914581 F F F  
 0.9946589127200838 0.5735124322934197 0.8924180614243511 F F F  
 0.9023436394226749 0.2258526731515360 0.3894569514998594 F F F  
 0.3967499290178154 0.0732744036992372 0.3112402691252996 F F F

Structure 19 S=8/2

1.0000000000000000  
 20.1473052208877697 0.0000000000000000 0.0000000000000000  
 0.0000000000000000 19.7681594983396742 0.0000000000000000  
 0.0000000000000000 0.0000000000000000 13.2309279702280254  
 Al C Fe H O Si  
 2 1 2 10 198 94  
 Direct  
 0.2747373295949433 0.5695534631783468 0.7819406939723887  
 0.4909464496320977 0.7279610892330920 0.8183033641563549  
 0.4835993554828553 0.6423056776307406 0.3494568273013900  
 0.3323447456219366 0.6246208044239873 0.5922845595083689  
 0.4984341732906771 0.6739458161926073 0.6201567491648337  
 0.5213689691386324 0.6947996224420812 0.4540300578227802  
 0.1986252789335442 0.6673749280690161 0.5644099242485218

0.2412877925780342 0.7004990391702729 0.4784272353132381  
0.6043559224846002 0.6994054989057048 0.7369000282564575  
0.6194853540150708 0.7090200704541834 0.6199820227723415  
0.2928950340485098 0.5751863367356350 0.4322809558972548  
0.4782757785358268 0.5788019793706389 0.5295890392857852  
0.5218580982426270 0.6036220034880245 0.3466834258203192  
0.4935880946916512 0.6924259569312367 0.3193520807183363  
0.4344323603674498 0.6309486294371915 0.3790302744392271  
0.7046902608931094 0.4735752683847925 0.3093900014294568  
0.1947833564695548 0.3317920462049427 0.8121690705589621  
0.2056282384440226 0.8197185620407447 0.3992366606687583  
0.6914588443423407 0.9724016443006924 0.8866607089080806  
0.6947428713298239 0.3229999918667237 0.8847233209923956  
0.2076167612120161 0.4810674807713187 0.3918384392591502  
0.1979738526141976 0.9717782285233079 0.8073302095703160  
0.7045322356231247 0.8179598122890416 0.3020501141323735  
0.5917830899528271 0.4643429758733958 0.4106115837398692  
0.3072204943650267 0.3399818835932319 0.9097982999849220  
0.0948928562046273 0.8319340834242177 0.2910785615085716  
0.8069223036351904 0.9696096563369855 0.7898690127530131  
0.8078086780256029 0.3299236634259767 0.7868923406936309  
0.0951405055629425 0.4677783567851945 0.2903799716392365  
0.3104922170637864 0.9808785600272300 0.9092695926977048  
0.5950933497328664 0.8375203272701709 0.4051656816035786  
0.5991616417200401 0.5385496082600777 0.2424164942742579  
0.3014150743314377 0.2743526987927787 0.7343323171968554  
0.0965176172257721 0.7578769661503226 0.4591219842195011  
0.7936521016442378 0.0382432818028220 0.9612158534343032  
0.8011445526945156 0.2574645978257258 0.9558585566368731  
0.1001882059066557 0.5446087891339992 0.4561326771589927  
0.2934658042869148 0.0528169807259263 0.7430829189981287  
0.5925259024287266 0.7567380116059514 0.2453060263853584  
0.6029255954831949 0.4034506228446651 0.2349149927800105  
0.2913010267394144 0.4101250325025780 0.7411861856148984  
0.1054856532788170 0.8930721435724936 0.4673429283485550  
0.7937613904244636 0.9026889719425705 0.9589501331184207  
0.7956946232449801 0.3922081049812009 0.9615292942490855  
0.1071028697703704 0.4104772104753925 0.4707493389367642  
0.3106107357740820 0.9205066778197655 0.7306383085826765  
0.6073815577001692 0.8899634506853473 0.2204564416471527  
0.5236832112525168 0.4437527641660730 0.5781382798433686  
0.3805729179464575 0.3543534927622444 0.0731871223725816  
0.0209981815765608 0.8566950661935954 0.1309812504095406  
0.8756441489841317 0.9390075521808133 0.6279293117886880  
0.8784228863609576 0.3613295271699932 0.6274040379452283  
0.0204885599453584 0.4413728432795572 0.1309335992143311  
0.3690003717492270 0.9415011566270574 0.0785337803620187  
0.5218501705093450 0.8626745322851990 0.5665515833283862  
0.5146379748227812 0.3542124314971333 0.4283513304733869  
0.3958052759169548 0.4408613643705426 0.9193377422037101  
0.0150699556372424 0.9400465529711668 0.2899696503264153  
0.8810811050939956 0.8572149271931697 0.7886581429299413  
0.8814712884633694 0.4424716379945052 0.7893925428988522  
0.0190182832452374 0.3575384268868311 0.2901577446945792  
0.3493694249160408 0.8548371889239735 0.9270272298656672  
0.5137033452486577 0.9429239719014046 0.4051129507595911  
0.4606757374140579 0.4752021160752916 0.4079730924282436  
0.4356000495956457 0.3147580491846658 0.8998180362610965  
0.9648388681101289 0.8179346671037304 0.3051394885062613  
0.9392286006299857 0.9757546204809977 0.7953512129918712  
0.9389355634547316 0.3232477453874723 0.7961016179634599  
0.9651688283998151 0.4790537323130085 0.3051302805250635  
0.4403695559052780 0.9530797456770722 0.9148142149361008  
0.4646632139195698 0.8212243836059205 0.3920319105921610  
0.4708851340393063 0.5126453749982500 0.7326306247087410  
0.4279549506762105 0.2722908354303119 0.2130039836960832  
0.9769347320421162 0.7775299423863681 0.9864116571615044  
0.9174819125628046 0.0230592630547786 0.4868392813778223  
0.9126267050170086 0.2734353542842631 0.4877112019178805  
0.9796935174531586 0.5231537295720954 0.9864459355722121  
0.4114940477254213 0.0249729181460788 0.2173424018691356  
0.48312416456660717 0.7649180584293487 0.6963080487042617  
0.3964987641449118 0.4312662396053353 0.6228481910953764  
0.5095728972432547 0.3536473573960233 0.1141000711062862  
0.8946508229264133 0.8645087759243010 0.0764562844242818  
0.0013718071121004 0.9355600698494362 0.5712515287998737  
0.0031334388264255 0.3579313357210048 0.5644628091195026  
0.8942640734969022 0.4386929875285517 0.0749461778134574  
0.4956780813797850 0.9351968193239789 0.1377703520775468  
0.3957622912087363 0.8546771242629861 0.6162918936952311  
0.4898241879935620 0.3807687226820164 0.7445612706606597  
0.4259224541845078 0.4048711043461328 0.2463658637380195  
0.9891996811682280 0.9091104710163148 0.9534149238000774  
0.9056114182092130 0.8922012771674774 0.4472428200460133  
0.9067419296236968 0.4043195022571256 0.4454747313309185  
0.9886673899933860 0.3909136827167856 0.9529688285745396  
0.3973020762552046 0.8942034138751389 0.2576350627121518  
0.4861229435161094 0.8896273210330676 0.7542857029217997  
0.3134498305628262 0.5330565306096016 0.6718377765651006  
0.6010195134684507 0.2726779886964151 0.1945120750692750  
0.8106991051010347 0.7732856235409855 0.0048177500587289  
0.0895293058693509 0.0240995821819334 0.5002791245035144

0.0994688521191766 0.2770687569858014 0.4983361373387876  
0.8039465331395778 0.5233733739581579 0.0015335916035644  
0.5856102134341683 0.0220947587970985 0.2064678587871857  
0.3055179207498371 0.7856498250862660 0.7170003599473679  
0.2733421037038804 0.4340660060779996 0.5490125706251194  
0.6343262364506947 0.3604295073600463 0.0527414281313419  
0.7690876560786585 0.8622819932176780 0.1413633886093916  
0.1236802383247544 0.9412573972275617 0.6484887869878028  
0.1219490683032073 0.3579722752913628 0.6513897529146488  
0.7689030672249260 0.4356787811919238 0.1428329345423430  
0.6121788549750211 0.9501479264713675 0.0441502614362427  
0.2677094439342839 0.8621791373313528 0.5646790870157750  
0.3341488501088987 0.4450314092180759 0.3733030600937094  
0.5654104461015225 0.3292928746983508 0.8894917555984342  
0.8346639751049360 0.8306602405162709 0.3054640981925200  
0.0691212974484455 0.9692670012515154 0.8238956893401553  
0.0673997455702641 0.3226353038248990 0.8270349268122758  
0.8349555580152269 0.4651798978314908 0.3055991184212706  
0.5646822220491452 0.9703662026052501 0.8594045614296774  
0.3339486000228132 0.8290011529146385 0.4013073748454906  
0.2425755403289500 0.3521664505185889 0.3956528240073238  
0.6354095180509051 0.4433936790798723 0.8946233904176812  
0.7588367564781260 0.9403984650198011 0.3049391740459588  
0.1368584829573198 0.8542658598001834 0.8021805952043273  
0.1211481394462703 0.4438354110695465 0.8066295275630869  
0.7609321326988342 0.3534119248885987 0.3037341014548750  
0.6282248120382835 0.8556696925819276 0.9016817310925994  
0.2609173175129187 0.9427846306781766 0.4042628157292139  
0.3932089153981075 0.5351909745764821 0.2618502038098245  
0.5046629083296510 0.2485571077868785 0.7635280017415427  
0.8919025655442647 0.7573996198748354 0.4420331025563548  
0.9960069048713709 0.0443025051399618 0.9409371169825127  
0.9896316567642319 0.2554200294211558 0.9473415646851032  
0.8910785840550053 0.5395308134314162 0.4416567319509474  
0.4688734491355198 0.0246551256377904 0.7529119231761601  
0.3913079973145574 0.7577490626614181 0.2605794262190172  
0.7043175877854063 0.2321978939033799 0.3071630245256092  
0.1907659166175191 0.5584075463441049 0.7821544834660906  
0.1958481255781931 0.0583786697712054 0.3878039879981477  
0.6972076374908465 0.7419272214585053 0.9097200846154575  
0.6936592619577993 0.5633312169752275 0.9032635393276639  
0.2076837822690691 0.2254132437589828 0.4057889658015629  
0.1914322415405006 0.7321083336855778 0.7843020605607736  
0.6980098621442744 0.0585148897771331 0.3021432985531031  
0.5870739743560969 0.2459952111943809 0.3917674072206572  
0.3128108120408291 0.5451649067763217 0.8911894331277658  
0.0795077151061026 0.0563710375587146 0.3041144282759801  
0.8089144080069409 0.7454005675742920 0.8075151878844521  
0.8067141276740436 0.5530002759882724 0.8048170237523593  
0.0958326109707157 0.2479150044800996 0.3027874052594314  
0.2981721492052090 0.7337406794418611 0.9007733261798195  
0.5856850216841238 0.0553773286577383 0.4022630766135770  
0.6058098714259923 0.1480283557985060 0.2581858964908550  
0.2938963391202644 0.6531773807457421 0.7386958826123147  
0.1041247893580337 0.1496616099521218 0.4423793180397897  
0.7901120553507052 0.6491409044829447 0.9446865931974368  
0.5264114942655875 0.2561937166172425 0.5663623549568207  
0.3706983546511656 0.5269294863367878 0.0678897093612284  
0.0174524294773233 0.0247074891467866 0.1349794749014221  
0.8733612791594969 0.7700965754363918 0.6379004282348691  
0.8758551074896372 0.5282683084227310 0.6379159239074523  
0.0214990356975177 0.2698999559097546 0.1395886531802404  
0.3625014952557945 0.7630881547435936 0.0698693348532112  
0.5131054536171501 0.0230665352381625 0.5646528172933791  
0.4540215307234786 0.2366664891310392 0.4025414447741515  
0.4438747748354900 0.5644895377746213 0.9126780197558233  
0.9475954445346527 0.0555440743673188 0.2971674808234662  
0.9418029893840084 0.7386123012209435 0.8012604928044408  
0.9384218690788122 0.5632763200536872 0.8049038923680922  
0.9644168135951795 0.2361881315745925 0.3118175578123346  
0.4305857224139187 0.7498738890267594 0.9010762361837092  
0.4544075057022924 0.0632178036801325 0.3977266947756946  
0.4988023623172546 0.1391313186115103 0.6573542571772901  
0.3932543370630727 0.6458702185927530 0.1523801984415822  
0.0003968120464090 0.1486170838120904 0.0646932843473768  
0.8828213797106808 0.6489820508871490 0.5551339862712679  
0.4051741899180465 0.2332809770700006 0.6313946890382418  
0.4915388871812043 0.5551849905469107 0.1310511074003229  
0.8987494359460980 0.0630866347508990 0.0737159633298052  
0.9897044212606473 0.7275076479796374 0.5680775261294467  
0.9907542755350293 0.5727745864662201 0.5609168704186649  
0.8987223631060178 0.2337167530338274 0.0884149050297958  
0.4880259484252621 0.7384390581999366 0.1256255032862896  
0.3915031737864054 0.0687176552184112 0.6072606480985993  
0.2945846581899212 0.1596707809630198 0.6271425918432714  
0.5873170350867601 0.6480671738612719 0.1286239746257440  
0.7966484036995380 0.1485644380606017 0.0726461782223072  
0.0988005587775597 0.6502044937398589 0.5764013704844805  
0.2983657052880890 0.2769687489344206 0.5348114945032494  
0.6056558382476581 0.5278217888321733 0.0431674726439821  
0.7867719760023208 0.0281504171672062 0.1608170346939397  
0.0974914726828060 0.7728985015577742 0.6578708740886475

0.0954015241000475 0.5250662326801737 0.6546111922876583  
0.7803848015677504 0.2699393100413121 0.1523187545593040  
0.6053771548238051 0.7695243739012374 0.0485607680782810  
0.2718095282505666 0.0375106237268139 0.5467992237496003  
0.3288286536142416 0.2557105849746740 0.3424738156608141  
0.5690501615004894 0.5561449015183215 0.8526835476043855  
0.8223739142265742 0.0534434839123779 0.3530777625051699  
0.0690120039467267 0.7433886096610443 0.8504224870748678  
0.0668990503343841 0.5620090761576789 0.8441561372317645  
0.8334313761989406 0.2424421635876011 0.3322891351490229  
0.5727471250022029 0.7368259319199693 0.8576775665001884  
0.3250624944867656 0.0565141860474991 0.3635567292999548  
0.3970739271941547 0.1507318941384584 0.2749166371109481  
0.4860513481823666 0.6439759241519302 0.7675133564533371  
0.9019662598694954 0.1477512492605940 0.4267451133966204  
0.9902221426744970 0.6509545433479154 0.9340449033159256  
0.5173627522464345 0.5933661607669852 0.5684324026890277  
0.4119490483867620 0.6652517041252116 0.5933124704929951  
0.5274581858009637 0.7221799889686513 0.5163402550896301  
0.2431684817638448 0.6847330668695366 0.5482506850870917  
0.5998908873241778 0.6781219628145599 0.6692521384932032  
0.3345326200973547 0.5896135813263458 0.4632556206392263  
0.6245541099957983 0.4700053312330404 0.2984896315143005  
0.2740025056146521 0.3388757525737470 0.7978639403664637  
0.1251993912341594 0.8258746072724646 0.4047611670022612  
0.7710778799270397 0.9708868641532814 0.9002719640416224  
0.7746068673697966 0.3252049290077128 0.8986608292504340  
0.1270295596137877 0.4755197928178150 0.4028194109580109  
0.2774496920615908 0.9808726429048240 0.7971809452134280  
0.6245080424115274 0.8256550037848635 0.2920285500468882  
0.5231011878870016 0.4337556313449868 0.4565526889129262  
0.3797526483807974 0.3631850456214952 0.9511809098384417  
0.0236861025529176 0.8619265632735401 0.2528640561768771  
0.8756226965668700 0.9353523289422176 0.7501863916467009  
0.8767218932595744 0.3645998704596878 0.7493395381798068  
0.0246384694130891 0.4360048136944813 0.2527510338571702  
0.3675697049434417 0.9320165943603144 0.9571851852679669  
0.5234681656885971 0.8650285084722221 0.4441993257563817  
0.4706379229696979 0.4423417910257464 0.6705362977152292  
0.4354200331026311 0.3465238980122127 0.1621478959616262  
0.9702266430619303 0.8520771517396512 0.0359360285483186  
0.9253739721634502 0.9474212258529747 0.5324633521401906  
0.9260265739175848 0.3490662067591566 0.5305884078002570  
0.9704420772440741 0.4485404774048380 0.0352369918100061  
0.4193967193488500 0.9489773771489756 0.1731361161823732  
0.4713001367306896 0.8422681908545390 0.6568904276881431  
0.3196687581013135 0.4522470216221765 0.6449965301965047  
0.5867318206372504 0.3475034889545207 0.1492683466441260  
0.8175267643711053 0.8505266095024385 0.0454937706358941  
0.0795156110598974 0.9489765993072420 0.5473055500462716  
0.0825597225316940 0.350788030322332 0.5457608837260158  
0.8161903054511822 0.4476616574697136 0.0454168412237579  
0.5746654957425771 0.9492560589715007 0.1522472928589473  
0.3197526635834990 0.8554441569074708 0.6579421893993758  
0.2652366939122606 0.4281136453560220 0.4275639636258811  
0.6320616747418341 0.3646975934086834 0.9301522268208706  
0.7668238829150718 0.8634116951038815 0.2638883518382107  
0.1315508091108865 0.9335236896417589 0.7699173298980005  
0.1260056477565999 0.3651712078990194 0.7734265334531072  
0.7674073734416889 0.4313061086344923 0.2653420703309454  
0.6237186414061261 0.9361112660652722 0.9245977853381785  
0.2674053353793148 0.8649931604072981 0.4419747506354709  
0.4036180958311819 0.4650228642399830 0.3221613599625115  
0.4987489635650879 0.3193887081919244 0.8242719678219217  
0.8994675272505013 0.8258046738603220 0.3759627154549600  
0.9980989181128129 0.9735935238612071 0.8790156891296483  
0.9961455312934973 0.3243703654208663 0.8821442088898823  
0.8997663414478700 0.4711370151156383 0.3757268696474947  
0.4898292078998076 0.9591965926202859 0.8190765990149942  
0.3970913808329313 0.8264702391612229 0.3262233564098594  
0.6247888385132115 0.2252860158863541 0.2879158139050567  
0.1177798446945644 0.0717070390165244 0.4096517363299467  
0.7759284124982082 0.7277457100211390 0.9170489909139176  
0.7732795052532029 0.5715985083195267 0.9135976416310940  
0.1269664215232736 0.2258500125219800 0.4120607640943085  
0.2719760215486644 0.7266959665265936 0.7848203732250110  
0.6189580209118598 0.0702746623738594 0.2919194604288520  
0.5204360887899866 0.2732915993154180 0.4467348654148641  
0.3785674589844995 0.5198524424436883 0.9458787054811194  
0.0150065955212672 0.0192462550257007 0.2572327128036403  
0.8761110395488658 0.7776068748667772 0.7599802245064777  
0.8753737338819970 0.5219564158916953 0.7600877331250653  
0.0255128956259227 0.2778017644198147 0.2615449342425858  
0.3616448023582903 0.7746487988741184 0.9481855719279924  
0.5170825037874512 0.0212026928405166 0.4420767313241821  
0.4830549939607883 0.2192958439077457 0.6542439418025202  
0.4130744454379654 0.5667543919002468 0.1531650080511443  
0.9775229715338480 0.0706738740255865 0.0530669881697929  
0.9099507454793213 0.7258950041980670 0.5509599244267874  
0.9106768039035092 0.5722768222087538 0.5492453154876811  
0.9769402569803392 0.2267938414053152 0.0598521415862524  
0.4098208391058108 0.7257017780555169 0.1513316386930870

0.4678868233664739 0.0640921302224646 0.6460310804879525  
0.3250218142646712 0.2357354690059252 0.6327472063957307  
0.5706066896255996 0.5679395989233874 0.1360683631697555  
0.8189784456446757 0.0698129992602395 0.0672443037193817  
0.0694671930808526 0.7275096686644724 0.5655448498330635  
0.0707051234737621 0.5722988227761880 0.5627718681520059  
0.8196614315683340 0.2271496327161897 0.0663701103457696  
0.5676134163822554 0.7274978010222146 0.1365154307586152  
0.3132304353198628 0.0797981734904850 0.6313506313746599  
0.2701097748513356 0.2764429128082762 0.4197873995270126  
0.6253905367694930 0.5225303918277151 0.9240992853750523  
0.7670949384556079 0.0203070400497712 0.2794708528505149  
0.1236715849884672 0.7754453302878237 0.7745614320808881  
0.1203863238660871 0.5230224511706457 0.7728803560541109  
0.7700695440942541 0.2742200058440964 0.2743014566445492  
0.6248746779955232 0.7756721575896892 0.9293622478256801  
0.2641674605858035 0.0237807699759919 0.4259395488477062  
0.4018746981941096 0.2291787404522089 0.3090997268350164  
0.4932041692664956 0.5679232286496275 0.8157732378830764  
0.8971362244006026 0.0696162421681122 0.3908424325335731  
0.9948876937651739 0.7280452589405546 0.8928811327867211  
0.9942804369015392 0.5736728970240058 0.8925258831332965  
0.9027051464534058 0.2257670478428500 0.3892322318744358  
0.3966675056492968 0.0730868123102568 0.3135966811426951

Structure TS reaction CH4/16 → 19 S=8/2

1.0000000000000000  
20.1473052208878016 0.0000000000000000 0.0000000000000000  
0.0000000000000000 19.7681594983396991 0.0000000000000000  
0.0000000000000000 0.0000000000000000 13.2309279702280005

Al C Fe H O Si

2 1 2 10 198 94

Selective dynamics

Direct

0.2743164266423079 0.5689491480399766 0.7821848414039252 F F F  
0.4915152461034396 0.7271461925617970 0.8175159415697379 F F F  
0.4875803133630888 0.6297980533281948 0.3647532526010394 T T T  
0.3313420937632434 0.6261666635252505 0.5950259916553475 T T T  
0.4944313921986172 0.6771625578394028 0.6175325989106242 T T T  
0.5173058494091196 0.6951011032101438 0.4512916315112436 T T T  
0.1970585703997604 0.6663264579743321 0.5676335343376974 T T T  
0.2399801236259126 0.6990081902309302 0.4814342068861779 T T T  
0.6032087982004636 0.6998439912293385 0.7320898934199807 T T T  
0.6163545830920738 0.7139722558577060 0.61586838234666931 T T T  
0.2918701912453710 0.5745942152437076 0.4347710806153697 T T T  
0.5033239945469987 0.6113604134273936 0.4731088732779817 T T T  
0.5147287948084812 0.5866528361328673 0.3350084774736838 T T T  
0.5021049178521862 0.6779326329128711 0.3302078504900297 T T T  
0.4341735773482512 0.6237214287308483 0.3752642094276024 T T T  
0.7044109400905043 0.4744030518310822 0.3090634467984685 F F F  
0.1947953347660416 0.3312050332888958 0.8117055271853957 F F F  
0.2059759506826424 0.8194053638991434 0.3979780427117561 F F F  
0.6919215932873968 0.9718885709593081 0.8852763278672171 F F F  
0.6947537140402744 0.3231328999343646 0.8851861394410534 F F F  
0.2071503126895990 0.4818611758915168 0.3931561004607786 F F F  
0.1987113437284336 0.9715418292177915 0.8067953196714797 F F F  
0.7046243099611615 0.8178061667577481 0.3007267134479576 F F F  
0.5918308116249236 0.4655069635188482 0.4109165011517817 F F F  
0.3071425461947683 0.3395180983282771 0.9088844694787284 F F F  
0.0945433228601686 0.8311839790032138 0.2919443106307540 F F F  
0.8079332898389779 0.9706390240329910 0.7900555250392074 F F F  
0.8077081481072312 0.3302050703007993 0.7870516940215566 F F F  
0.0947906406138515 0.4682144342434142 0.2911050144166225 F F F  
0.3115860685435621 0.9811683120477497 0.9071658624145940 F F F  
0.5955112641947551 0.8370940333407475 0.4044481525521562 F F F  
0.5984575988008629 0.5400421074893629 0.2435288488727565 F F F  
0.3012842010713541 0.2738614721240538 0.7335873070266601 F F F  
0.0980340443717225 0.7573446289095642 0.4606427480297342 F F F  
0.7929922581849027 0.0387686378397163 0.9616567591685694 F F F  
0.8015630979309449 0.2578839431372799 0.9561105889483414 F F F  
0.0995704697713435 0.5443856296263974 0.4577046081369431 F F F  
0.2935811712985412 0.0525664467126816 0.7406625695178235 F F F  
0.5923854173205001 0.7564777130565616 0.2447282454052129 F F F  
0.6021518972318134 0.4052005966688768 0.2342845116792205 F F F  
0.2910811477612967 0.4098258772332031 0.7401496596497168 F F F  
0.1061746794205973 0.8926332335476772 0.4678174444864212 F F F  
0.7945135878219745 0.9032142302916455 0.9583410628067384 F F F  
0.7955116876709170 0.3926565303872351 0.9614194003067098 F F F  
0.1071017474079312 0.4101138637457140 0.4707443161945264 F F F  
0.3109192713931961 0.9202059591628000 0.7288471781808283 F F F  
0.6072459770020728 0.8897271358380650 0.2194787791828787 F F F  
0.5247339144616276 0.4430566815261798 0.5778052634422792 F F F  
0.3805049724676337 0.3539862425495741 0.0721373756930248 F F F  
0.0208699184445393 0.8563244423740599 0.1316984911378185 F F F  
0.8761745125238676 0.9389979979084515 0.6281760594403423 F F F  
0.8785025433605824 0.3614010567622188 0.6277469146496628 F F F  
0.0201192464435778 0.4421737854291621 0.1313992831287223 F F F  
0.3693049489541451 0.9417594610871660 0.0773308638611141 F F F  
0.5226160562155542 0.8639190426791643 0.5659796874684488 F F F  
0.5169479758675521 0.3540623485523540 0.4275811954610091 F F F  
0.3953043762140993 0.4405813279457362 0.9181960027364369 F F F  
0.0154532977537585 0.9399256412688430 0.2903679563860209 F F F

0.8806896276466887 0.8572614167561809 0.7889848148428626 F F F  
0.8812859675505251 0.4428165950696439 0.7894225464222018 F F F  
0.0189339607378258 0.3577848466225078 0.2900304302461976 F F F  
0.3498587785334450 0.8549955283663877 0.9262032208001045 F F F  
0.5155412787576168 0.9433302008670736 0.4037988688987468 F F F  
0.4601458354509518 0.4731128024995712 0.4073612878630968 F F F  
0.4355895490654831 0.3145872574626409 0.8989268666263328 F F F  
0.964636869902155 0.8178707860615262 0.3059929314031891 F F F  
0.9403070695294318 0.9751687400347464 0.7951892357010806 F F F  
0.9388252875447449 0.3236256671154933 0.7967369607149877 F F F  
0.9648623973114567 0.4792431411256786 0.3058858046187609 F F F  
0.4411993432894477 0.9531160729438426 0.9142656016244928 F F F  
0.4647959679919325 0.8225429174391437 0.3917753564654376 F F F  
0.4736922361820746 0.5129815733778074 0.7307877394289974 F F F  
0.4284379782746299 0.2710521007112874 0.2108466581045008 F F F  
0.9764745894074665 0.7773257269052536 0.9869618301076883 F F F  
0.9177802891035896 0.0234307751643001 0.4874163343630897 F F F  
0.9125869070968164 0.2733375131767914 0.4881227895853328 F F F  
0.9785411329918006 0.5235052459493730 0.9866105701459560 F F F  
0.4124180865470137 0.0262343503278260 0.2145262947877455 F F F  
0.4857514778426051 0.7657835721605508 0.6964941653444399 F F F  
0.3973831617260970 0.4308956333874150 0.6241957216558518 F F F  
0.5094817668324083 0.3541328946448417 0.1133873054772820 F F F  
0.8946154382466602 0.8646225170502149 0.0768106400619715 F F F  
0.0017478121258065 0.9355151506419475 0.5705098078133162 F F F  
0.0031276505602378 0.3577304013441918 0.5644376601466590 F F F  
0.8938499394386881 0.4387200947185192 0.0755486883509988 F F F  
0.4961708312960766 0.9356624897463064 0.1359249166516747 F F F  
0.3968263527047782 0.8540190046540133 0.6164219889137001 F F F  
0.4910865804453834 0.3810510782204020 0.7451202264282486 F F F  
0.4248942302705956 0.4025326269519169 0.2467839502087514 F F F  
0.9895374705835351 0.9088343013089428 0.9539989354922156 F F F  
0.9053836304240761 0.8926558956397912 0.4471720439472264 F F F  
0.9065393107129935 0.4042998892200487 0.4458349414035752 F F F  
0.9885469527677557 0.3912413994859278 0.9536473167392145 F F F  
0.3979988957701508 0.8959792507583018 0.2572191015204197 F F F  
0.4872537891926427 0.8901617602745802 0.7539122830781011 F F F  
0.3149773324256913 0.5333282139656177 0.6731029935273369 F F F  
0.6008239128137376 0.2740926370180148 0.1957773267080043 F F F  
0.8103654798095050 0.7737454801491666 0.0048671268313853 F F F  
0.0902225050979908 0.0238830004296844 0.4997654747481306 F F F  
0.0998296452270679 0.2767934016237561 0.4991008637768601 F F F  
0.8034034718032927 0.5235890877726490 0.0025197757724769 F F F  
0.5863070256108713 0.0220665202930377 0.2054408632889135 F F F  
0.3055159841183368 0.78539259066370236 0.7159937950964448 F F F  
0.274755456492918 0.4352383662530670 0.5484040186282044 F F F  
0.6344124363412291 0.3609393624498125 0.0530338237495229 F F F  
0.7687166840634987 0.8634064322296950 0.1404642836212773 F F F  
0.1237423053917013 0.9414366700947028 0.6486631448547158 F F F  
0.1217699775285368 0.3582486487230412 0.6516912410384776 F F F  
0.7683557252385000 0.4354425368416557 0.1429663806578034 F F F  
0.6129943779885494 0.9500683620804651 0.0432021960287301 F F F  
0.2691565926339194 0.8614979496731223 0.5625774740702454 F F F  
0.3332221405179467 0.4470833183738421 0.3709218110141919 F F F  
0.5654755421205948 0.3280987181694783 0.8904681756364567 F F F  
0.8347077939062544 0.8322084643907104 0.3040712292374863 F F F  
0.0700368289651081 0.9688057824597323 0.8251022716097935 F F F  
0.0672979471948878 0.3231155922553555 0.8274837795816765 F F F  
0.8347094927088250 0.4646632415430361 0.3053836074813319 F F F  
0.5652295740712674 0.9716330988524362 0.8587422687118291 F F F  
0.3341532730263879 0.8285070092400062 0.3978397649671876 F F F  
0.2430506473378529 0.3530320546031049 0.3955785926838828 F F F  
0.6339648861603564 0.4431239408057621 0.8937880433287049 F F F  
0.7574088511648114 0.9408972939959384 0.3045280730885409 F F F  
0.1377220179698071 0.8540080473252587 0.8015471500521372 F F F  
0.1221154339582213 0.4438067970703372 0.8072699555192173 F F F  
0.7598190156536901 0.3536022010530289 0.3041640043716498 F F F  
0.6268822156925467 0.8557510313435230 0.8999370454768325 F F F  
0.2612446406574520 0.9423177485313019 0.4026189168256167 F F F  
0.3952761454221161 0.5334502558769074 0.2587926465156443 F F F  
0.5048111249878602 0.2484255730997162 0.7631416543961720 F F F  
0.8897533854242710 0.7580179922862058 0.4414987184033379 F F F  
0.9964241902962669 0.0440593950793868 0.9410330479103450 F F F  
0.9897821492221794 0.2556892996687097 0.9476893332252061 F F F  
0.8897226822076121 0.5394340903796149 0.4416203350070873 F F F  
0.4687458306434280 0.0247050794781245 0.7517105732692855 F F F  
0.3939953960413618 0.7593005015718859 0.2574771671494531 F F F  
0.7045004077246517 0.2318590195429877 0.3061363988761556 F F F  
0.1903031175119452 0.5588330520351619 0.7784173640064580 F F F  
0.1958403157046504 0.0576653567449483 0.3855453138582163 F F F  
0.6980994749734108 0.7435501539624951 0.9055624984870718 F F F  
0.6938289988579953 0.5623097394825791 0.9009163901595656 F F F  
0.2081687902458782 0.2262791717906438 0.4051905637963173 F F F  
0.1912484140584141 0.7315826223609676 0.7818652090310536 F F F  
0.6981229829617632 0.059789055553136 0.3014487901974618 F F F  
0.5876411670143824 0.2445657258853728 0.3922550102275224 F F F  
0.3104754243528163 0.5437658588785439 0.8924201378059635 F F F  
0.0787418863855578 0.0569679504392511 0.3041726957232882 F F F  
0.8115502115145077 0.7435387512303109 0.8082660492617322 F F F  
0.8080806734566508 0.5543439000131372 0.8062445671704239 F F F  
0.0958143760145234 0.2481861029845618 0.3034144752921932 F F F  
0.2973463056538392 0.7345450574675496 0.9003279469812426 F F F

0.5854689875186025 0.0568640469050408 0.4007563520321682 F F F  
0.6057466701047431 0.1485404186672596 0.2554398701969873 F F F  
0.2940796241211103 0.6528291651674820 0.7399400411403079 F F F  
0.1053270535846806 0.1496002556294442 0.4424322474242288 F F F  
0.7885721465247926 0.6493406400881057 0.9468405264520925 F F F  
0.5265940911581097 0.2562471581287795 0.5661335147389153 F F F  
0.3709808327252802 0.5270581254693525 0.0668112326440848 F F F  
0.0169833739725007 0.0244711159084332 0.1351368527173875 F F F  
0.8740848141901409 0.7704638463346996 0.6378339816814744 F F F  
0.8750178863238887 0.5287369017942822 0.6380253280909187 F F F  
0.0217764940889182 0.2698083701381435 0.1399058330427252 F F F  
0.3635193130729419 0.7621581729401541 0.0679638001619267 F F F  
0.5135409049075506 0.0233965099631348 0.5634467129422660 F F F  
0.4544857514888392 0.2374733235764950 0.4016993484844491 F F F  
0.4417290977963688 0.5646140267881776 0.9099072505526493 F F F  
0.9468985205010938 0.0549293056710098 0.2970714727695309 F F F  
0.9443919145581816 0.7400245974557578 0.7996726137698005 F F F  
0.9400025764843392 0.5628294231700863 0.8032190379536388 F F F  
0.964377788905439 0.2364624322004119 0.3120310391145367 F F F  
0.42299312071976686 0.7495444198444261 0.8977726470219807 F F F  
0.4540193522519260 0.0623599864659354 0.3966844051663614 F F F  
0.4989756212636536 0.1391232102676483 0.6567745207105418 F F F  
0.3950612714420600 0.6457531428726924 0.1532249706686102 F F F  
0.0009907352086671 0.1485841095500504 0.0644987653619253 F F F  
0.8816200566223742 0.6493353106291480 0.5543671812982751 F F F  
0.4053505629993310 0.2332075732763172 0.6309874368916653 F F F  
0.4928324647479556 0.5558635839760910 0.1271881720528754 F F F  
0.8987712273334481 0.0638481677282599 0.0726374985547977 F F F  
0.9891160439324196 0.7272746416008218 0.5639298019105965 F F F  
0.9895185184085022 0.5732509102031287 0.5599866951569439 F F F  
0.8990612980700305 0.2333975453842356 0.0886759065282874 F F F  
0.4895744074176349 0.7376489883366091 0.1213794433224820 F F F  
0.3918304184993602 0.0687342384926879 0.6054735718898172 F F F  
0.2947986250764529 0.1596385732620504 0.6250015930879442 F F F  
0.5892024910035403 0.6481037939632728 0.1272734898131489 F F F  
0.7964439160441543 0.1490493427123312 0.0731707275908633 F F F  
0.0978235975329227 0.6498277666279222 0.5783613553331861 F F F  
0.2988786279309465 0.2775475447856479 0.5342413216561042 F F F  
0.6084285638847788 0.5271033755347787 0.0446073586229403 F F F  
0.7875212573338644 0.0285610725773893 0.1613904114184805 F F F  
0.0948175859411009 0.7725061459309330 0.6596952008359764 F F F  
0.0925628045119993 0.5245255031486877 0.6561825351291048 F F F  
0.7810561267417029 0.2707884881526752 0.1524308886260641 F F F  
0.6079600186586944 0.7694679915377591 0.0481208833659394 F F F  
0.2722423758894266 0.0375791681826101 0.5443005939552990 F F F  
0.3294189209258462 0.2567502430858681 0.3417601934360874 F F F  
0.5680570953024571 0.5573669035287949 0.8566486587835627 F F F  
0.8220157876815080 0.0530162868815438 0.3543946522738040 F F F  
0.0705234605967391 0.7435284654156149 0.8538922536526670 F F F  
0.0678548984485090 0.5616365844728293 0.8470455362396976 F F F  
0.8333846945795358 0.2431526303542100 0.3326645057354938 F F F  
0.5729715464487413 0.7353803600737479 0.8586113714659618 F F F  
0.3249433377868414 0.0558012862202801 0.3603825408096881 F F F  
0.3970341960500718 0.1509826838964088 0.2753100670991557 F F F  
0.4852661033056762 0.6435331308105603 0.7656141872746787 F F F  
0.9017847932229373 0.1478277657469533 0.4262437328176745 F F F  
0.9898398474019743 0.6510657607453609 0.9334657351762843 F F F  
0.5080170401568184 0.6013041756490874 0.5567536946936399 T T T  
0.4060220452528926 0.6755342697875298 0.5986135120808733 T T T  
0.5192425907359708 0.7250995044362267 0.5126616196776296 T T T  
0.2414637784347514 0.6842961582024433 0.5518226711799841 T T T  
0.5974540867427149 0.6811872892925658 0.6630046250240658 T T T  
0.3324899474870668 0.5910402230988380 0.46666071287482087 T T T  
0.6241696952706732 0.4712888136056819 0.298721082888962 F F F  
0.2739716882100254 0.3384994340556418 0.7969406008321513 F F F  
0.1256618963160889 0.8253966640208148 0.4051441235291620 F F F  
0.7714479849050306 0.9713616010395825 0.8999746899872036 F F F  
0.7746121624016027 0.3254589161817663 0.8988966631941011 F F F  
0.1265958669651113 0.4756388762284374 0.4036578655850391 F F F  
0.2780934722282495 0.9807390462187797 0.7953972503430435 F F F  
0.6245506983512854 0.8254445587345813 0.2910204574910082 F F F  
0.5234376946550583 0.4338183859875002 0.4562385644081175 F F F  
0.3796265246654471 0.3628151355697113 0.9501789010434507 F F F  
0.0235935358728270 0.8616575308470260 0.2535892359985752 F F F  
0.8761792722822364 0.9354516155732355 0.7504089836320063 F F F  
0.8766510419543820 0.3648709039557616 0.7496407510307748 F F F  
0.0243540444855199 0.4363783493147935 0.2531883015728909 F F F  
0.3682095339065228 0.9322009508240257 0.9559773170977053 F F F  
0.5242279528391833 0.8655073914781397 0.4435964205379364 F F F  
0.4719120445729246 0.4422705215392781 0.6701651152317751 F F F  
0.4353452023120283 0.3456240436423172 0.1609866274166052 F F F  
0.9701837575252128 0.8519322117916488 0.0365305840502828 F F F  
0.9256459174156504 0.9476199984350870 0.5324841829982745 F F F  
0.9259662404639215 0.3490114762237440 0.5308357416956397 F F F  
0.9699604924807161 0.4488863271058392 0.0357461545145483 F F F  
0.4200080351880544 0.9499034525193366 0.1714496243913715 F F F  
0.4725945415812660 0.8428782843610207 0.656612863919171 F F F  
0.3206873029697093 0.4524619745599097 0.6451832701016400 F F F  
0.5865294459248886 0.3485742071963287 0.1494643998032146 F F F  
0.8175265227518054 0.8510184819698452 0.0452346670221999 F F F  
0.0799539092004906 0.9488776584093586 0.5470692072018295 F F F  
0.0825616468213326 0.3505781062076991 0.5460332485346129 F F F



0.8157895756840716 0.4477694857400536 0.0458987194904950 F F F  
0.5751828426026862 0.9493168523620881 0.1510960200142577 F F F  
0.3205247763862502 0.8549537198344481 0.6566415192066515 F F F  
0.2654437346799625 0.4290926270591484 0.4272168696078893 F F F  
0.6317961577069227 0.3645224019795066 0.9304030024069903 F F F  
0.7663916147388363 0.8641435817820877 0.2629736693114921 F F F  
0.1321603622645640 0.9333656687684808 0.7699185082179270 F F F  
0.1261474300829590 0.3651525374923281 0.7737043798765484 F F F  
0.766772994292363 0.4314146706859745 0.2654712051658166 F F F  
0.6239128383046193 0.9362319373061752 0.9234293788124717 F F F  
0.2680546104638637 0.8644917781575288 0.4399053490057696 F F F  
0.4038224825013472 0.4638813538930364 0.3208777009082695 F F F  
0.4991231179311555 0.3191719810579556 0.8241222090057647 F F F  
0.8988398691467339 0.8263901823659268 0.3757289743190668 F F F  
0.9987761797314292 0.9732196133660338 0.8794897520334573 F F F  
0.9960870530906973 0.3247380831388469 0.8827067040919943 F F F  
0.8992405849883269 0.4710262899654865 0.3759522455204447 F F F  
0.4904730576067209 0.9597843756838600 0.8184097002148292 F F F  
0.3980284056391952 0.8275368964131431 0.3242218444996539 F F F  
0.6248801196247342 0.2254102295499578 0.2873927465896600 F F F  
0.1180773041121554 0.0716269027498697 0.4090034622523291 F F F  
0.7763663896654478 0.7278949723271779 0.9168029733480338 F F F  
0.7731610148100643 0.5717837692315655 0.9142770022743747 F F F  
0.1274781560969913 0.2260216302319265 0.41222760789855917 F F F  
0.2717555547137067 0.7269259524183056 0.7842790636547790 F F F  
0.6190302959331362 0.0710350517480975 0.2904192510472754 F F F  
0.5212441499442519 0.2732381771567773 0.4464187836454485 F F F  
0.3774269308967746 0.5193681132017787 0.9448689568499731 F F F  
0.0146318238508698 0.0191085874697805 0.2573971865565028 F F F  
0.8774996132671262 0.7776432140977008 0.7598696821651529 F F F  
0.8758462969728598 0.5223472083165532 0.7601752752174917 F F F  
0.0255612513195373 0.2779797629907605 0.2618354115342996 F F F  
0.3617410632717721 0.7746654624791489 0.9466263402474695 F F F  
0.5174977334435198 0.0215694943380811 0.4408504413021106 F F F  
0.4832389176315743 0.2192721150412851 0.6538221840452962 F F F  
0.4143926511866667 0.5664908874701666 0.1510987378970654 F F F  
0.9776803501883649 0.0707443029676966 0.0528940304637686 F F F  
0.9091487248251440 0.7261092213882776 0.5496622031317244 F F F  
0.9094582785699927 0.5725871048068996 0.5488547220357916 F F F  
0.9772852151813751 0.2267235122616000 0.0600560021759549 F F F  
0.4116176856937415 0.7255886790298618 0.1492284056563165 F F F  
0.4680942118308380 0.0641516918629890 0.6448240349611467 F F F  
0.3252248572404710 0.2356921570623456 0.6317796265294717 F F F  
0.5719484736970770 0.5681713426752282 0.1353120418546609 F F F  
0.8189550041376279 0.0703381120767190 0.0673541361068573 F F F  
0.0688318378966599 0.7272243448679419 0.5658622325510123 F F F  
0.0693477816119881 0.5720975089067579 0.5638084761300632 F F F  
0.8199506019393823 0.2274954237363289 0.0666483876055750 F F F  
0.5690362583601711 0.7273958682639616 0.1350691096001668 F F F  
0.3134987084882539 0.0797535399985634 0.6291166400843764 F F F  
0.2706558039172293 0.2772540608804377 0.4191957671983388 F F F  
0.6254789603405513 0.5222694788002542 0.9244417017262450 F F F  
0.7668753222724973 0.0207712805135642 0.2796559377560541 F F F  
0.1235147853666092 0.7752514716828856 0.7749718418334339 F F F  
0.1199904004316608 0.5228539858765018 0.7731776096209373 F F F  
0.7699944312079552 0.2745827450628084 0.2743113775419914 F F F  
0.6253746633487651 0.7756881588816711 0.9280543436060142 F F F  
0.2643408812293302 0.0233529013085843 0.4236207313208809 F F F  
0.4022959408165221 0.2294936282036844 0.3084686577015745 F F F  
0.4929254054831560 0.5681295040583549 0.8154428465459915 F F F  
0.8969083768106998 0.0695348369674349 0.3911640752039958 F F F  
0.9956519780131998 0.7283286910046627 0.8934176655682933 F F F  
0.9945070368092459 0.5736424431115736 0.8927400970495256 F F F  
0.9026153830096817 0.2259597778481961 0.3893275508772760 F F F  
0.3968220010630930 0.0730430893884630 0.3120011385755603 F F F

Structure 20 S=10/2

1.0000000000000000  
20.1473052208877697 0.0000000000000000 0.0000000000000000  
0.0000000000000000 19.7681594983396742 0.0000000000000000  
0.0000000000000000 0.0000000000000000 13.2309279702280254  
Al C Fe H O Si  
2 1 2 10 198 94  
Direct  
0.2743915124130268 0.5690556421706169 0.7835036254611916  
0.4919738342631940 0.7288012396428056 0.8147459859481362  
0.4542439494662112 0.6405497551424393 0.3689396256558906  
0.3288342806135151 0.6221647927243349 0.5913233033877199  
0.4974434227531928 0.6678075883388674 0.6170417761969895  
0.5751611510985725 0.6873505129609849 0.4661005998918730  
0.1967291772701263 0.6679630531025013 0.5731748775384130  
0.2375079380792956 0.6987847300813259 0.4837973513167497  
0.6073190668108071 0.698526282337994 0.7348886923793142  
0.6146375528468102 0.7359864692567806 0.6327649852854543  
0.2748409130044685 0.5713414890808115 0.4389491685263732  
0.4658966290720842 0.5994949198770838 0.4204773139015531  
0.4875200125960114 0.6502820011781898 0.3057209805104026  
0.5024731375259369 0.7039724129238023 0.4355055635051019  
0.4040461557107293 0.6602578026758742 0.3671179036672024  
0.7033066277710777 0.4745847362065276 0.3099067732571837  
0.1941374384113909 0.3300840709162163 0.8126112322514385  
0.2064569128738601 0.8195410066986374 0.3961136728057491

0.6924469823643569 0.9745766026511278 0.8827714730026602  
0.6950559665739160 0.3212480456151709 0.8871908542894822  
0.2064852458543701 0.4822386468143691 0.3945514062396828  
0.1995262535203267 0.9708756940384047 0.8066556937159562  
0.7046770827972386 0.8176284415208005 0.2974758769376066  
0.5902368397367145 0.4664908357909915 0.4116883679907208  
0.3068760215059214 0.3389677513661202 0.9089114718139367  
0.0942247688345087 0.8310103814691372 0.2922963487762955  
0.8090990692965723 0.9716866264499415 0.7895731192307912  
0.8073351831123187 0.3305376063634790 0.7876296988236510  
0.0940789215945842 0.4686561161589335 0.292300557252516  
0.3132150933056675 0.9829421553228661 0.9046468271594480  
0.5965607219279988 0.8400882917929769 0.4009902487102164  
0.5979577951731272 0.5420437104004184 0.2461650054595043  
0.3004406302609247 0.2722812837713632 0.7344885769707640  
0.0992345227673679 0.7574337617415184 0.4613720940401058  
0.7936964243489023 0.0391486009209464 0.9619260622815540  
0.8032086780069865 0.2582234042156840 0.9568207517520578  
0.0990141344107522 0.5444343111774190 0.4591575530457356  
0.2929210289763821 0.0527089274764658 0.7380942082367922  
0.5914889785251247 0.7573430875257594 0.2434689978935978  
0.6004192611739718 0.4071902361451932 0.2338206801080779  
0.2897297570907237 0.4081671665520396 0.7390081763263663  
0.1072521746828036 0.8927421724970122 0.4678445628662907  
0.7936398049596567 0.9035823918957012 0.9565185420347175  
0.7949290058403617 0.3929449284617198 0.9621384243301723  
0.1065775020199405 0.4100192126046580 0.4715112367607253  
0.3113343741311652 0.9202414273448779 0.7269996972445376  
0.6077535925382738 0.8901782557936245 0.2149200485196829  
0.5246153669053567 0.4432448900237257 0.5800609823794379  
0.3799255940644026 0.3542526541634562 0.0726548400133169  
0.0202117622277518 0.8559707609803117 0.1322191248664454  
0.8767793139097364 0.9386148322178911 0.6280761479006985  
0.8780315341643173 0.3615811778208322 0.6280814001954619  
0.0199575242148573 0.4425466830517161 0.1318547842569211  
0.3698432203551733 0.9429679045451940 0.0758130789672878  
0.5241920469759559 0.8602895906684705 0.5635124763276761  
0.5176683261597548 0.3541604162967057 0.4292925384372590  
0.3939984595780125 0.4408851232911640 0.9187304873028880  
0.0151864387625108 0.9397818346690205 0.2905732150333074  
0.8803815912161403 0.8572176533103827 0.7893487159518366  
0.8807263460908175 0.4431517611620223 0.7896419253344240  
0.0187260832077869 0.3579707409299103 0.2903246341135211  
0.3472139611158111 0.8562163268146258 0.9254804413783893  
0.5143418939651366 0.9440172157824759 0.4039491607556876  
0.4578595349958468 0.4718506235595934 0.4113198115783125  
0.4355142839831245 0.3152032551382678 0.8998566106918704  
0.9644283851119365 0.8175878817185088 0.3068415521876083  
0.9414779298550012 0.9744398882198134 0.7945882340593267  
0.9384026434801923 0.3240295898464208 0.7971443613844601  
0.9639324584522556 0.4791552984256973 0.3057537579574403  
0.4420511124748142 0.9505856149105691 0.9123323217165785  
0.4652764537841493 0.8221568352740897 0.3913250560146098  
0.4729385482998410 0.5126388256345179 0.7359348888013971  
0.4283596958992142 0.2731795094179664 0.2129537943012355  
0.9765187121770745 0.7772654552619314 0.9867385988293292  
0.9179839751069397 0.0237941907843402 0.4879034373715893  
0.9123054891980538 0.273252277784713 0.4887785484884028  
0.9774613538383655 0.5237632215625169 0.9873119465701885  
0.4131501543100717 0.0274303120982569 0.2131856079686080  
0.4845487285705402 0.7632433087761029 0.6899854036081006  
0.3980134872268857 0.4299866871399025 0.6280653866111441  
0.5093127435321775 0.3542269728725981 0.1122284553729681  
0.894448545508061 0.8653174685507766 0.0746299773551463  
0.0021215519632545 0.9352714125244248 0.5692072946766206  
0.0027370929962142 0.3575877492861398 0.5652183733257049  
0.8935428791602068 0.4382508881878333 0.0767124556799565  
0.4967374157468959 0.9371426813003487 0.1331964678497312  
0.3976156237231305 0.8548628331869192 0.6141913260261403  
0.4931767221164287 0.3813275924660430 0.7474828485441826  
0.4264567824504854 0.4056785185182802 0.2446469860663668  
0.9907797089686229 0.9086663844819935 0.9539086845092976  
0.9049503159381030 0.8932566022206607 0.4464973269770088  
0.9063039791553039 0.4041887736517511 0.4461564115168152  
0.9881906384551392 0.3916330663210938 0.9540990666910593  
0.3998755546631720 0.8971227175670279 0.2560591058560484  
0.4892461402620365 0.8884492560189270 0.7513649538916387  
0.3145632374922040 0.5319243066883337 0.6749773882924811  
0.5995173006021347 0.2753519109816192 0.1995952476685442  
0.8095403143530552 0.7743336128326921 0.0046881740963659  
0.0907425268499122 0.0239015868502403 0.4995331589559983  
0.0993572093237976 0.2766214975011091 0.4995473843997568  
0.8040294365126927 0.5238500073840699 0.0036583529818003  
0.5864609344954652 0.0227367479277946 0.2053911619640007  
0.3066401694077060 0.7851881250354981 0.7136800990349572  
0.2774574024147707 0.4351033482422444 0.5464720864008799  
0.6350343253235922 0.3594323443198846 0.0552489526338003  
0.7688652510688312 0.8651794356993067 0.1390784112992416  
0.1237023546511010 0.9417446086903196 0.6488955817360542  
0.1214845145911660 0.3578943180304109 0.6522912234963254  
0.767775303545596 0.4359227745108444 0.1436880946309565  
0.6135641968496708 0.9535540766178019 0.0410229234226309

0.2704052571792838 0.8614927191219162 0.5599263821682482  
0.3316738101887204 0.4477145669648872 0.3641858965262775  
0.5658363498846499 0.3265101101310904 0.8927877972387012  
0.8347095782793313 0.8334212434000786 0.3025127179213682  
0.0710313372093080 0.9699462689571722 0.8259687966164481  
0.0667201176241969 0.3231868960335799 0.8281232371835194  
0.8336513475371257 0.4646432742186835 0.3066813618124075  
0.5655339075766680 0.9717731039858036 0.8559070068558275  
0.3346619405322179 0.8280854454231995 0.3939279552408918  
0.2428536648192147 0.3535943585392231 0.3954768896463668  
0.6352348656198039 0.4414430488501109 0.8967294392679543  
0.7560171128281887 0.9412486528465885 0.3042452819191245  
0.1369561443782531 0.8542068615905986 0.8016240156880937  
0.1224501488172067 0.4434803931678316 0.8076170892857070  
0.7585758147055283 0.3537845526818617 0.3043922925090871  
0.6296422316692210 0.8578987994101612 0.9008400079243662  
0.2623803095288971 0.9422291763408280 0.3998814466074633  
0.3989971936873445 0.5367634871584490 0.2615066599103136  
0.5040135403173686 0.2482741745966520 0.7646211623059573  
0.8875608373664750 0.7587598894935479 0.4412840747298284  
0.9958601733790716 0.0440221176590321 0.9411764921026605  
0.9888359469219042 0.2560731864371179 0.9484235820255500  
0.8893471801213988 0.5393687046287103 0.4420661485944016  
0.4676122400398563 0.0229093847964472 0.7500157031275426  
0.3965044508270879 0.7606148496121615 0.2531545750619892  
0.7043347469179055 0.2317882228851624 0.3064663869624850  
0.1903160118741800 0.5586623655758438 0.7790154608974710  
0.1957373246915572 0.0571167234533451 0.3835575272889292  
0.6983439251480389 0.7442342770509678 0.9022737526881804  
0.6942531047945453 0.5609970665418482 0.9017862553856414  
0.2081348172528086 0.2268317561554541 0.4058321757110450  
0.1913952824364596 0.7325254168524910 0.7782048606715239  
0.6981541387328970 0.0608522164215023 0.3012738345098420  
0.5879549082195628 0.2439440805170759 0.3951017649001990  
0.3097757782512734 0.5445758734344240 0.8949793204215242  
0.0781767128253995 0.0570749356838177 0.3041757104206764  
0.8130929843268440 0.7424119892804308 0.8088153986257621  
0.8087900995407492 0.5554007646897141 0.8076262265389180  
0.0957368672927835 0.2483981249836228 0.3038380705946694  
0.2967981584450250 0.7351811647817573 0.8981416867064984  
0.5854575987435540 0.0570002770931023 0.4005108224923020  
0.6052180667532047 0.1492178126989963 0.2558507913525769  
0.2936265093484843 0.6523362231767118 0.7393352684746998  
0.1058283067910499 0.1494998399041104 0.4422178645967372  
0.7874157434162465 0.6496260369469757 0.9484936419701554  
0.5262332978748624 0.2561817769199237 0.5678944424917306  
0.3713392759756973 0.5261171218327900 0.0695480468002144  
0.0166730573613899 0.0242952638440267 0.1352108239111023  
0.8744618205705195 0.7706820344654451 0.6378864060389914  
0.8742774320267650 0.5293488028935562 0.6384746590683089  
0.0218608570357480 0.2698636981675082 0.1403671301700326  
0.3644311915212889 0.7629337830277353 0.0643918605267130  
0.5135613822141215 0.0239927869389799 0.5629628635355871  
0.4546895853219600 0.2378205046472618 0.4027559013247572  
0.4408944692766137 0.5651827654787168 0.9129222152962877  
0.9464122820525710 0.0546963330314640 0.2970903595862281  
0.9458561168781366 0.7407176648527427 0.7986837018394257  
0.9408187385293117 0.5624588137406915 0.8026556832056073  
0.9642724785399899 0.2366913257849105 0.3125882481309273  
0.4291875321253860 0.7530258839854974 0.8920065258344723  
0.4538434075908053 0.0632047911169517 0.3959967764565959  
0.4983788842200296 0.1389183670234559 0.6585811006118849  
0.395444237388310 0.6466219967703472 0.1497442642564161  
0.0016698078481942 0.1486470766099663 0.0643203804619947  
0.8810656068970004 0.6496595158144215 0.5536563429846286  
0.4048608467961140 0.2329689032180586 0.6315558997933701  
0.4938965042833191 0.5575414541165237 0.1256922684830066  
0.8988262331956056 0.0648805904333208 0.0734473172464978  
0.9886095571023349 0.7277683099859816 0.5600587843209222  
0.9889046984429998 0.5734962506247531 0.5608006614092735  
0.8992608800909322 0.2324706840468323 0.0907815670814546  
0.4908536424341742 0.7371918837172102 0.1163588271681827  
0.3916989906402262 0.0690475254385121 0.6040349639613612  
0.2943108326914201 0.1596130409756869 0.6221585715025170  
0.5909888275014601 0.6486451185066475 0.1266496593260835  
0.7958783691568645 0.1493234634676449 0.0737447765821154  
0.0969775184135833 0.6501693068551569 0.5794076854704922  
0.2985457090335571 0.2785713838660944 0.5351233441979800  
0.6106614331555803 0.5261031956720363 0.0482788794808212  
0.7877122444059536 0.0287855192077341 0.1617862880931419  
0.0925641950132123 0.7729733786554505 0.6603362469091750  
0.0917798310784929 0.5249199454152670 0.6577338576329342  
0.7810700746928622 0.2711008272671994 0.1528689801122755  
0.6103465174770003 0.7702713627180440 0.0476099549512572  
0.2724778711677340 0.0373096718978797 0.5418412929556278  
0.3294515208313752 0.2570715740050724 0.3431145010328540  
0.5680742197497214 0.5544385029898213 0.8616607212014711  
0.8217507198211851 0.0524832749189920 0.3553033808399688  
0.0715356608140272 0.7430278187106812 0.8550360154826936  
0.0682267722807769 0.5609841425425596 0.8493369982484934  
0.8331738045216975 0.2438827533798015 0.3331603322470703  
0.5725287161941458 0.7401459163901105 0.8579194942098668

0.3248818524031892 0.0564397841327694 0.3579638435201473  
0.3974749444262702 0.1521818985616469 0.2747831287222706  
0.4905116050097499 0.6436820218661343 0.7726325918741606  
0.9012929042562395 0.1479370858786916 0.4259059585798595  
0.9896149174660377 0.6510737911237969 0.9331808483270727  
0.5182354681616018 0.5927506872025798 0.5740575959688523  
0.4085146120421657 0.6641373998056719 0.5905317905153851  
0.5383034066249578 0.7167464226779655 0.4856947453600440  
0.2404126363783791 0.6867786024013943 0.5552155772595195  
0.6045366155406396 0.6915229568590255 0.6609271778541165  
0.3179799889526472 0.5860123313680986 0.4644266994648482  
0.6229695113363036 0.4723685275702995 0.2998258335338642  
0.2732998158988107 0.3372988894452122 0.7972558717269999  
0.1261817922156288 0.8254096230039550 0.4049885602654364  
0.7718888197011069 0.9724658392034196 0.8988746641042653  
0.7749047439534961 0.3253098272245344 0.8998634426420724  
0.1259738985450894 0.4757481398779020 0.4048740685144095  
0.2786689472069271 0.9809204097443196 0.7936024391224887  
0.6247616138392184 0.8265351185903426 0.2876502124281474  
0.5225976526780542 0.4340165119522838 0.4585708271192841  
0.3790444971181257 0.3629875341327369 0.9506161709506598  
0.0232446887857508 0.8614288132724297 0.2540611159620845  
0.8768693068849862 0.9353730082344348 0.7502822978082937  
0.8762222764099623 0.3651963700416126 0.7499733354601471  
0.0238941316287514 0.4366180532706711 0.2536940176092816  
0.3683496257161997 0.9327250017029373 0.9544569913255739  
0.5248294260692200 0.8662045117034293 0.4413857500944712  
0.4724824368815500 0.4426597364811699 0.6734809455023809  
0.4353171166390716 0.3470591927036255 0.1609634998321659  
0.9702941844161606 0.8519412734212246 0.0361024441326206  
0.9259024825566065 0.9477377402362761 0.5321195595521468  
0.9256164568370160 0.3489886627448318 0.5313580707976705  
0.9695074879470390 0.4490601247698131 0.0364936915666928  
0.4207544394814687 0.9512140196912788 0.1696642474490988  
0.473025267773308 0.8412728108769921 0.6542546667501979  
0.3210164787578790 0.4514074463797770 0.6459929788664271  
0.5858950336269605 0.3491442416505867 0.1506882552332147  
0.8172450085606671 0.8518442692994426 0.0436729123483304  
0.0804112566608086 0.9489029187369618 0.5467764951322021  
0.0821666165754083 0.3503807236599027 0.5467025122991406  
0.8155444938639088 0.4478315660355824 0.0468496631471747  
0.5756733526057176 0.9508519936139417 0.1486638425367336  
0.3212231180767674 0.8550054493886551 0.6547104685000100  
0.2658093450395372 0.4298094761732249 0.4258475992828284  
0.6322741612441781 0.3627963813495151 0.9326251582207418  
0.7662624795575080 0.8649519977578016 0.2614362567119944  
0.1324182788930416 0.9335929785259303 0.7700969742394479  
0.1258882920382536 0.3647703635548593 0.7743459822719164  
0.7657241338053002 0.4316887245809826 0.2661707722261097  
0.6248682027414895 0.9384495465278021 0.9216696269008305  
0.2688892444685218 0.8643775126164842 0.4372797265727622  
0.4039250658774189 0.4654757487712594 0.3207766719099044  
0.4994879623976695 0.3190313957507428 0.8258797982509772  
0.8981948929730623 0.8268567854184194 0.3754140996358353  
0.9994715509412194 0.9732606536325554 0.8796395529773881  
0.9955271763744274 0.3250363877869930 0.8833050725930859  
0.8985835122995893 0.4709357112434236 0.3764021834078098  
0.4908948415205998 0.9582482553008098 0.8161341064323134  
0.3992265570701182 0.8280891878354890 0.3215756535129859  
0.6245408131943796 0.2258003165658541 0.28929955444081128  
0.1182064767280899 0.0715622725497809 0.4084152555792142  
0.7763539313986653 0.7279919056209840 0.9164583089325725  
0.7733537859626067 0.5718597085007271 0.9155415267476491  
0.1274642507977368 0.2261735927462525 0.4126203844179026  
0.2718981932746823 0.7268246958258980 0.7816800029353437  
0.6190266398273850 0.0717546317231571 0.2903316698077770  
0.5214080460466330 0.2733269815534055 0.4481954626217034  
0.3767347250906962 0.5195822692909864 0.9469577949205348  
0.0142138797552591 0.0189654345993625 0.2574804058413679  
0.8782904414052239 0.7775763595349510 0.7598841964594716  
0.8759168386171674 0.5227421390578589 0.7605735681459037  
0.0254745326574193 0.2781645228298668 0.2622961906798292  
0.3610865652659658 0.7759415742204159 0.9431732069017511  
0.5171639124989917 0.0224225475704868 0.4404125801604411  
0.4826685458900611 0.2191726465303942 0.6552431546152168  
0.4155231466091232 0.5673930367633835 0.1510301760689426  
0.9777060561470297 0.0709709928018304 0.0530885272781273  
0.9084675968471474 0.7264557456366773 0.5486285387752151  
0.9089109111225377 0.5728642252316396 0.5491158654436484  
0.9773305220771634 0.2266489750671628 0.0607530548581776  
0.4127566289611156 0.7263056793288083 0.1447742848133882  
0.4676334732728466 0.0640644866384954 0.6445480369050111  
0.3247267397551243 0.2355698448903830 0.6316680895286376  
0.5730321567699396 0.5687837694093338 0.1362715881885285  
0.8190204435726877 0.0708016914872516 0.0678612813437704  
0.0682644205970572 0.7275335687333215 0.5656068024517674  
0.0687329655009514 0.5723587117028339 0.5651140549616880  
0.8202349604038017 0.2275445193879753 0.0676441545958902  
0.5702538178243081 0.7278638812377630 0.1327200644749692  
0.3132212229776459 0.0798355920127106 0.6267705048048194  
0.2704717566006711 0.2779909069103814 0.4199193922783790  
0.6265544857404370 0.5204358617555157 0.9276620326444337

0.7665778647655167 0.0211061252454017 0.2798488516576315  
0.1231897260402081 0.7754595966718303 0.7745240469302568  
0.1200499050780934 0.5226778915243618 0.7742915795861253  
0.7696206372539935 0.2748735468776305 0.2746917715133089  
0.6264813051975557 0.7777350670825907 0.9271460684443522  
0.2645802712225569 0.0232873305527899 0.4211635829300301  
0.4024492312614270 0.2305043498819050 0.3094828380377476  
0.4935351601097700 0.5678553454470255 0.8201669755773784  
0.8966869315347982 0.0695316867452277 0.3914262807605682  
0.9962763758973296 0.7283098948813359 0.8933530587780522  
0.9945204001995095 0.5734568452537609 0.8932781012872365  
0.9023634926551852 0.2261996590776074 0.3896155930062192  
0.3969963398867800 0.0740868088632780 0.3107135814317015

Structure TS CH4/16→20 S=8/2

1.0000000000000000  
20.1473052208878016 0.0000000000000000 0.0000000000000000  
0.0000000000000000 19.7681594983396991 0.0000000000000000  
0.0000000000000000 0.0000000000000000 13.2309279702280005

Al C Fe H O Si  
2 1 2 10 198 94

Selective dynamics

Direct

0.2745812986859022 0.5690173447422424 0.7830550145275197 F F F  
0.4915457651941111 0.7281818952495840 0.8142380935360549 F F F  
0.4512470073185990 0.6433222273728962 0.3721435141881372 T T T  
0.3336610529584744 0.6243471047872813 0.5956092696652991 T T T  
0.5027794952378041 0.6667461583218008 0.6214195192187693 T T T  
0.5622047665769689 0.6879568433304630 0.4695817702863975 T T T  
0.1974540862465874 0.6676583071895416 0.5752478700417639 T T T  
0.2368585597829290 0.6985525513305851 0.4846477020283123 T T T  
0.6074317011560211 0.7003388228639339 0.7378842082003908 T T T  
0.6177389556622117 0.7357299401970344 0.6342908731552713 T T T  
0.2801681382755767 0.5740062664755025 0.4483199771193950 T T T  
0.4599063891095924 0.5989254368670397 0.4189916992736312 T T T  
0.4836318843022687 0.6499207876415647 0.3067987306129970 T T T  
0.4841945299887699 0.6914492427300475 0.4402858131266142 T T T  
0.4002727100054750 0.6607016077372768 0.3660027000187331 T T T  
0.7034963554453242 0.4748809394359839 0.3097506427319416 F F F  
0.1942482356538022 0.3296826045766323 0.8123276739050240 F F F  
0.2062428024646721 0.8193718527197476 0.3961232273009259 F F F  
0.6924516663258586 0.9731061711693769 0.8831051980287938 F F F  
0.6949045339954338 0.3223407765271844 0.8864485023455089 F F F  
0.2063123990978895 0.4826180916589209 0.3945951637150671 F F F  
0.1995292649218001 0.9710866162719327 0.8065018870885865 F F F  
0.7045768739741121 0.8177374031226563 0.2983594068021347 F F F  
0.5903224635421864 0.4668754197503446 0.4110636801115319 F F F  
0.3069498425967510 0.3394405555067337 0.9085977632040212 F F F  
0.0940402058076586 0.8308174780865158 0.2925838570991743 F F F  
0.8091781008974834 0.9717247373826154 0.7900093373254578 F F F  
0.8074147637999332 0.3306156085063918 0.7875962702080628 F F F  
0.0940511766459693 0.4687296182524250 0.2923267820947260 F F F  
0.3132278783108475 0.9825964270939167 0.9042020950377179 F F F  
0.5957452432857124 0.8362731975997022 0.4024200886139511 F F F  
0.5981069053140615 0.5420793743797745 0.2449760231372622 F F F  
0.3007485345713974 0.2719150702132822 0.7347213738216283 F F F  
0.0992106398315045 0.7572010209323068 0.4616513741225390 F F F  
0.7928367601160531 0.0392415809321207 0.9621584357235236 F F F  
0.8024514754463539 0.2583743207282438 0.9567713384260230 F F F  
0.0987162914387838 0.5442930389696059 0.4594801415997978 F F F  
0.2930989886289979 0.0525983208996692 0.7375088471202886 F F F  
0.5919285873133902 0.7567039428647604 0.2426823115357735 F F F  
0.6007510958759923 0.4073170259495456 0.2336054747129737 F F F  
0.2895765692095580 0.4077467518587881 0.7380192742607576 F F F  
0.1071608450908244 0.8925514424556340 0.4681198649720812 F F F  
0.7943318724687458 0.9036554509073298 0.9570842419121277 F F F  
0.7951019529710521 0.3931673619394971 0.9619435236254574 F F F  
0.1067000437354650 0.4098623072807257 0.4712568387394356 F F F  
0.3111235869767057 0.9201477040593957 0.7264848372796777 F F F  
0.6069529703338574 0.8900700161415855 0.2176993961008122 F F F  
0.5248328497727499 0.4424461414781220 0.5791786898979794 F F F  
0.3800938551436772 0.3547338645274607 0.0722266434619101 F F F  
0.0202111047848277 0.8558479435435373 0.1324588358818346 F F F  
0.8767980382289906 0.9386917358409264 0.6283310377851592 F F F  
0.8781531970298815 0.3616493867374899 0.6281981072664706 F F F  
0.0197184414881733 0.4428495180448095 0.1320320193317812 F F F  
0.3699117162939913 0.9424282219807552 0.0752056450759113 F F F  
0.5245505381705442 0.8605915151469006 0.5639155431971048 F F F  
0.5181644322396934 0.3541334541799799 0.4276133209463993 F F F  
0.3943258470483713 0.4412886918916854 0.9180552077600979 F F F  
0.0153102693529092 0.9398081932784308 0.2906682170198707 F F F  
0.8802260704709965 0.8571701413929844 0.7894674302022366 F F F  
0.8807526471576992 0.4432741373304339 0.7897196661839203 F F F  
0.0186132188544548 0.3580635759151392 0.2901926293140988 F F F  
0.3490117561881192 0.8560917687677829 0.9237704842041907 F F F  
0.5171675398595639 0.9437858374458870 0.4032652300149024 F F F  
0.4580034430750075 0.4718876002561885 0.4111250063853973 F F F  
0.4354051078223478 0.3153148023155907 0.8994295901241358 F F F  
0.9642471358147020 0.8176981643589727 0.3070520232573983 F F F  
0.9415893887567037 0.9743262976684761 0.7947542467409363 F F F  
0.9384666971833298 0.3241273494750629 0.7973282302503861 F F F  
0.9640039408247318 0.4793285794240987 0.3062354389587654 F F F

0.4423114351144406 0.9518790166716542 0.9122351003820697 F F F  
0.4645581233696561 0.8235551370561751 0.3918140419667253 F F F  
0.4733456415204316 0.5117216370270015 0.7343375790972715 F F F  
0.4282210284820565 0.2731012807987767 0.2124190012234592 F F F  
0.9766282566500948 0.7771178033037245 0.9868033340660816 F F F  
0.9179748871340792 0.0239368821487957 0.4881852512441753 F F F  
0.9123285282083202 0.2732350083549164 0.4889504782585874 F F F  
0.9774933551569163 0.5239193072919619 0.9870865543331888 F F F  
0.4130753310740829 0.0279277760855194 0.2114273131824405 F F F  
0.4853203283144296 0.7640884212331045 0.6914577557379147 F F F  
0.3981837973171949 0.4288680469274553 0.6277351293279310 F F F  
0.5092711572155935 0.3545826835658943 0.1124793458884312 F F F  
0.8943341661048976 0.8644698599914307 0.0755431342579129 F F F  
0.0021436886664787 0.9354475275823191 0.5693065823176084 F F F  
0.0028004670244712 0.3576139539062027 0.5651457544848881 F F F  
0.8933136203944301 0.4389445451807958 0.0766984608959120 F F F  
0.4967512179376996 0.9369571155059759 0.1332477863637322 F F F  
0.3980162855710674 0.8548535127994086 0.6144947855044549 F F F  
0.4937996506847639 0.3805830273942945 0.7469403719038326 F F F  
0.4259098134334209 0.4054142120930280 0.2450288555610740 F F F  
0.9902057986180637 0.9086520910607945 0.9544958853076295 F F F  
0.9049047990958243 0.8934148950604381 0.4467220563702199 F F F  
0.9062429681915347 0.4041567596775053 0.4462189851005149 F F F  
0.9879110171144774 0.3916705542310694 0.9545289513315396 F F F  
0.3994392288459352 0.8981253423246898 0.2563630964294390 F F F  
0.4894334381182475 0.8895363119163164 0.7513800252745639 F F F  
0.3158929799272059 0.5316783584970253 0.6762933882393796 F F F  
0.5998753692725032 0.2756532472841329 0.1988084326159765 F F F  
0.8087767229520963 0.7742107949977992 0.0048981107344943 F F F  
0.0909464336917836 0.0238502250902357 0.4993461640609596 F F F  
0.0994211067889665 0.2765539567107282 0.4998346605756154 F F F  
0.8030724337608746 0.5240306198782250 0.0038101547549374 F F F  
0.5869233203440842 0.0225601917731098 0.2045842945485390 F F F  
0.3069808937529999 0.7850621999316587 0.7134554188740623 F F F  
0.2779555054166565 0.4362744625408794 0.5459484109832289 F F F  
0.6347826550245586 0.3603191092737035 0.0544843738478207 F F F  
0.7685052479065675 0.8650762541671426 0.1393483672573055 F F F  
0.1236719817645238 0.9418486722627009 0.6489773316216016 F F F  
0.1215076431007986 0.3581199896603167 0.6523005273269149 F F F  
0.7675786649098839 0.4356966834722655 0.1435803951871364 F F F  
0.6138811059695044 0.9513391310441079 0.0416681834105859 F F F  
0.2708878076849714 0.8611208720257366 0.5594085825448758 F F F  
0.3314673408995503 0.4498473832638368 0.3633551264405739 F F F  
0.5657447165296645 0.3254221031389832 0.8928773203650096 F F F  
0.8345843409700109 0.8338450378200619 0.3026570045511221 F F F  
0.0710967198213126 0.9690308106747025 0.8265120956677734 F F F  
0.0668181396343286 0.3239521052035528 0.8282973112237713 F F F  
0.8338404327279250 0.4642906213617266 0.3061634805547371 F F F  
0.5656799809573059 0.9727944969328632 0.8567919522626326 F F F  
0.3341829753637953 0.8275323966569772 0.3924870928816091 F F F  
0.2438988371680182 0.3542850004282769 0.3951199109872192 F F F  
0.6328572108068045 0.4416300325593454 0.8947492872650002 F F F  
0.7556004111987349 0.9414561963495984 0.3042182451471760 F F F  
0.1378981250620654 0.8539216093615920 0.8010736985081550 F F F  
0.1237110215949855 0.4437774272086514 0.8075628205387133 F F F  
0.7582667046560445 0.3537875365599561 0.3044996341185708 F F F  
0.6272681493587839 0.8572703891021405 0.8983771950906885 F F F  
0.2624130334182126 0.9419748917492825 0.3996514750676567 F F F  
0.4007817408908707 0.5371176843174084 0.2604292506547665 F F F  
0.5037456886710174 0.2476226511964654 0.7643487741697115 F F F  
0.8871627490870111 0.7589520738550561 0.4413503679304256 F F F  
0.9963040363943065 0.0439230648096185 0.9411349944290919 F F F  
0.9893463569596790 0.2561269207599608 0.9482562623875523 F F F  
0.8886786517288741 0.5392772321285690 0.4420075760769535 F F F  
0.4682101318448559 0.0238798457051743 0.7496312255483844 F F F  
0.3977886200972378 0.7615601385111361 0.2519965402721169 F F F  
0.7043837042431846 0.2316277857736679 0.3059927140383110 F F F  
0.1904013009186940 0.5595429166176942 0.7768075384224957 F F F  
0.1957468245474985 0.0568001435087524 0.3828726089743455 F F F  
0.6982726826869978 0.7451350908011776 0.8999902142358707 F F F  
0.6940401781641938 0.5602124885138693 0.8990419107354057 F F F  
0.2082490304947981 0.2276074652327083 0.4054902280163049 F F F  
0.1915175066568580 0.7319256889916090 0.7771506351561115 F F F  
0.6982126131993311 0.0612789777897973 0.3008774204748690 F F F  
0.5880205351027570 0.2435780491682777 0.3943354733644640 F F F  
0.3087695390675762 0.5442830923763609 0.8954314915990338 F F F  
0.0779041853410902 0.0573440974107200 0.3042273704277250 F F F  
0.8137955735979290 0.7418754510181813 0.8092271476752870 F F F  
0.8095703493238702 0.5560177091822496 0.8080442576636884 F F F  
0.0956062779739213 0.2484819967237257 0.3040127484118713 F F F  
0.2959656277036586 0.7360543153408159 0.8985715913072383 F F F  
0.5853528213817967 0.0580727394291927 0.399614757327171 F F F  
0.6052989222715297 0.1493774921720572 0.2541124290175674 F F F  
0.2951243567966699 0.6526252360661573 0.7402862297406330 F F F  
0.1064336063110787 0.1495329450904848 0.4421952404193874 F F F  
0.7859104794924363 0.6496669540026616 0.9487683070984829 F F F  
0.5263373113708667 0.2568929249804057 0.5674566797680143 F F F  
0.3720350655053082 0.5267797093105457 0.0684508361612970 F F F  
0.0164282265352327 0.0243083916823039 0.1352906928314823 F F F  
0.8744387775309832 0.7706478091613391 0.6379949684464492 F F F  
0.8740701857753805 0.5294266200268751 0.6384905658530684 F F F  
0.0217957445030876 0.2698072161824356 0.1404100046076948 F F F

0.3646301645285988 0.7633391027916545 0.0641677191778527 F F F  
0.5136442160553614 0.0237266634238722 0.5621318225668119 F F F  
0.4549181230424324 0.2378336554175249 0.4023759754235243 F F F  
0.4398805923328766 0.5661975819611982 0.9095850420805647 F F F  
0.9461337170900137 0.0544940868064359 0.2971150394745052 F F F  
0.9465125108400159 0.7411113103959934 0.7983192944151654 F F F  
0.9416303474543497 0.5622250122383932 0.8019217960686262 F F F  
0.9641453255837931 0.2367981575327249 0.3125695873675411 F F F  
0.4285746033652913 0.7505599707202464 0.8920244606324843 F F F  
0.4536894480343676 0.0617485323264617 0.3949857955407552 F F F  
0.4987901870052269 0.1391069777148175 0.6562783887160606 F F F  
0.3961169004981855 0.6470834277767992 0.1493609401579050 F F F  
0.0014955377674823 0.1486459144222252 0.0642479357023120 F F F  
0.8807507902871592 0.6497128480919443 0.5533957544617749 F F F  
0.4049500046005079 0.2330020500518515 0.6307876844350631 F F F  
0.4945590259499326 0.5582108447983529 0.1233286384928221 F F F  
0.8987190219421777 0.0647487209875948 0.0723501070163337 F F F  
0.9883904419892247 0.7278151670044366 0.5596695782236552 F F F  
0.9884690561947238 0.5734041390783204 0.5602379058663089 F F F  
0.8992218893846342 0.2327724027206415 0.0898418821548077 F F F  
0.4915188719507455 0.7372257276303671 0.1146455161724518 F F F  
0.3918495210476252 0.0689742856436126 0.6034341660850870 F F F  
0.2944905195123297 0.1595829610522514 0.6216261001891112 F F F  
0.5919414095326374 0.6487122358271549 0.1252136745776227 F F F  
0.7959340502876842 0.1494534886021839 0.0737748506883023 F F F  
0.0964223824393287 0.6499592100687224 0.5800450603147382 F F F  
0.2984573465221843 0.2788720893411991 0.5353127098616497 F F F  
0.6112553273528860 0.5263254364335594 0.0468757215665647 F F F  
0.7880471521863299 0.0288958111957527 0.1620190093428420 F F F  
0.0921792813505107 0.7728419148660421 0.6605656799395163 F F F  
0.0908698225697435 0.5246632102918340 0.6580754272515534 F F F  
0.7812727577069580 0.2712982205748204 0.1529100474700158 F F F  
0.6112035440597694 0.7705200306290720 0.0471618852945994 F F F  
0.2726424062111406 0.0373577888487304 0.5411202444345662 F F F  
0.3297023946744773 0.2570691391009419 0.3432843108798664 F F F  
0.5673424140488947 0.5561218383306894 0.8611213686761587 F F F  
0.8215979971154539 0.0524272205488572 0.3557967205125863 F F F  
0.0720323776072505 0.7431877525277386 0.8555306896318484 F F F  
0.0689029256445366 0.5609030128156292 0.8499746896235223 F F F  
0.8330961266285328 0.2440198738310002 0.3334012643202442 F F F  
0.5720930718278723 0.7376763629969503 0.8591224638705484 F F F  
0.3248218442212831 0.0560780358095414 0.3568662694048896 F F F  
0.3977085321153879 0.1520953128982777 0.2749804677348848 F F F  
0.4891211277383363 0.6432863627159691 0.7674439982789352 F F F  
0.9012723790181241 0.1479732350827732 0.4258432980055673 F F F  
0.9897872503168088 0.6510900619424618 0.9326807482740875 F F F  
0.5298351519492550 0.5935167203368992 0.5825804659823089 T T T  
0.4146995453994650 0.6599150859282306 0.5948500051267231 T T T  
0.5224576741452346 0.7106552414400961 0.4956504445574646 T T T  
0.2408349317571075 0.6863966067342718 0.5558563859022450 T T T  
0.6057764651073022 0.6922060620004878 0.6639514334138185 T T T  
0.3247836766755675 0.5883029001994514 0.4678515907001326 T T T  
0.6231863859111897 0.4726559875494658 0.2993136033176427 F F F  
0.2734032057937910 0.3371348270591241 0.7969115701421003 F F F  
0.1260326195237980 0.8251968638487668 0.4052436049325081 F F F  
0.7718853052289774 0.9722002280810500 0.8992620033833489 F F F  
0.7747307302042769 0.3256704159284922 0.8996730233799681 F F F  
0.1259312057183806 0.4758279587670415 0.4049379407204228 F F F  
0.2786842518156618 0.9808879028451898 0.7931536448867718 F F F  
0.6245770861845088 0.8256120491066952 0.2885311217669795 F F F  
0.5228706593993522 0.4338704604769603 0.4576219637847601 F F F  
0.3791559190661502 0.3633899877782625 0.9501682559721232 F F F  
0.0231705035790384 0.8613954429571393 0.2543020454097800 F F F  
0.8768920978769117 0.9353600512468319 0.7505342497751570 F F F  
0.8763121675304362 0.3653040919218853 0.7500680545141520 F F F  
0.0238356580748089 0.4367746783118207 0.2538421489318097 F F F  
0.3688088905293299 0.9327945233307844 0.9537505248192062 F F F  
0.5249428151202267 0.8659307863929016 0.4417865829665288 F F F  
0.4727434138688551 0.4414894668570852 0.6725308136962767 F F F  
0.4352062468562323 0.3471644186846419 0.1608952292167700 F F F  
0.9701692368379824 0.8516686009335714 0.0365234462918025 F F F  
0.9259063894848651 0.9478661560947046 0.5323494801939788 F F F  
0.9256691403198190 0.3490039345637825 0.5314220591747159 F F F  
0.9693489201720027 0.4493411667130545 0.0365993633790609 F F F  
0.4206796204176939 0.9513959578012816 0.1690819356990048 F F F  
0.4734850797745054 0.8416554909950165 0.6548611399956172 F F F  
0.3214566260805043 0.4514924572935755 0.6459455597616355 F F F  
0.5859911217307712 0.3495084736232172 0.1502678767386101 F F F  
0.8171194802898114 0.8515697763957348 0.0442292685251431 F F F  
0.0804464121589632 0.9489231550152795 0.5467825384269389 F F F  
0.0822406919908616 0.3504184701354021 0.5467089722633318 F F F  
0.8152888100839135 0.4480793041026487 0.0468324499795330 F F F  
0.5757255395946856 0.9502100165708285 0.1492731934545546 F F F  
0.3215199299329541 0.8549260760405559 0.6544104644341715 F F F  
0.2660788098917877 0.4307579144932703 0.4254218899265823 F F F  
0.6316621698344207 0.3631346012632335 0.9318326901417180 F F F  
0.7659935543682934 0.8651060923109242 0.2617340287710093 F F F  
0.1326250512764773 0.9333701303272223 0.7700696805396348 F F F  
0.1262396827506649 0.3650106959874861 0.774312107787833 F F F  
0.7656996540599366 0.4316301994089145 0.2660695566740046 F F F  
0.6244567603360025 0.9377129617833475 0.9216847208908590 F F F  
0.2688524373406054 0.8640651959708094 0.4367936061414284 F F F

0.4041594352262052 0.4659948448495754 0.3203324940152967 F F F  
0.4994861184058692 0.3183913106559118 0.8256478911465450 F F F  
0.8980246978127795 0.8270530787139876 0.3755898503435162 F F F  
0.9995036018507903 0.9730001891488200 0.8799358298748956 F F F  
0.9956329660646688 0.3252730361990785 0.8834339119480390 F F F  
0.8984850409673228 0.4708855641129546 0.3764346586479235 F F F  
0.4912210058626982 0.9592914025099475 0.8160808021649686 F F F  
0.3991717263995866 0.8287050380546503 0.3210794029174835 F F F  
0.6246260603891614 0.2258227234763908 0.2883670689052025 F F F  
0.1183372661589175 0.0715588316398694 0.4082069186968056 F F F  
0.7760085384711033 0.7280548078456874 0.9161311531822847 F F F  
0.7728902950689260 0.5718549698417661 0.9150959667170326 F F F  
0.1276187159095699 0.2263553138110055 0.4126456122141349 F F F  
0.2720257273694884 0.7269967243499877 0.7817753726948382 F F F  
0.6191022356413001 0.0720545695837913 0.2893423193021434 F F F  
0.5216765266500829 0.2733877396463811 0.4474935999030905 F F F  
0.3764904250032757 0.5199795893731434 0.9458469794974746 F F F  
0.0140694917186437 0.0189859471300622 0.2575569484176512 F F F  
0.8786130276426576 0.7775328730445068 0.7599522845197271 F F F  
0.8762961044505175 0.5228717107267045 0.7605522540893546 F F F  
0.0253842584398285 0.2782420690801004 0.2623225109433776 F F F  
0.3611172134554721 0.7757032428128738 0.9428928917902013 F F F  
0.5177163481989311 0.0222537169479580 0.4396097558819960 F F F  
0.4827716574713818 0.2192863796764541 0.6543215985489184 F F F  
0.4163498912991699 0.5678889453847233 0.1498301810571760 F F F  
0.9776904894360570 0.0709340860735281 0.05286608150784180 F F F  
0.9082635855015155 0.7264721154594156 0.5484996409915794 F F F  
0.9085015017659046 0.5728710153735150 0.5488877886946781 F F F  
0.9773881904077868 0.2267213428386725 0.0604977852265591 F F F  
0.4134742032963814 0.7267576262397881 0.1439414874455167 F F F  
0.4678921251841004 0.0642374467271551 0.6434835203413698 F F F  
0.3248110703888329 0.2355736128074568 0.6314641092997277 F F F  
0.5736789273306471 0.5689760411159241 0.1349421947056655 F F F  
0.8189043222969588 0.0708833129617901 0.0677246866996626 F F F  
0.0680462286390906 0.7273350048842602 0.5657602475273649 F F F  
0.0682719383139130 0.5722064444861275 0.5652696709970115 F F F  
0.8201250415880210 0.2277302542813047 0.0673876532846123 F F F  
0.5708431124106497 0.7277654033892915 0.1317149449484897 F F F  
0.3133689094197791 0.0797924725960968 0.6261777234231545 F F F  
0.2707764768162306 0.2784901496260161 0.4198767688568097 F F F  
0.6258771973891797 0.5207820420051661 0.9258936152394384 F F F  
0.7665504019422968 0.0212799016848422 0.2799250155831103 F F F  
0.1234526439269601 0.7752397433421905 0.7742973051793456 F F F  
0.1203598230626781 0.5228986351400025 0.7739250709244132 F F F  
0.7696166130266775 0.2749296609266167 0.2746830220910894 F F F  
0.6260426264335521 0.7772723838735800 0.9262828671489842 F F F  
0.2646384108424087 0.0230609581059014 0.4205135151186070 F F F  
0.4025845879612149 0.2304868386139205 0.3092527761418751 F F F  
0.4930129428820820 0.5676396707148967 0.8174779233622473 F F F  
0.8965907378025548 0.0695341204619737 0.3916063291205418 F F F  
0.9966401279965780 0.7283883345559872 0.8932727858144602 F F F  
0.9949689497479923 0.5734303512724992 0.8930277364851378 F F F  
0.9023154935121198 0.2262705665942590 0.3897178470211315 F F F  
0.3969797684249272 0.0738038093194291 0.3098566148227064 F F F

Structure 21 S=8/2

1.0000000000000000  
20.1473052208877697 0.0000000000000000 0.0000000000000000  
0.0000000000000000 19.7681594983396742 0.0000000000000000  
0.0000000000000000 0.0000000000000000 13.2309279702280254

Al C Fe H O Si  
2 1 2 10 198 94

Direct

0.2749930162553157 0.5686443559371958 0.7935377246437777  
0.4937220193496560 0.7268392105520622 0.8137696468635666  
0.2391644647054984 0.6590250441592882 0.3091392241358046  
0.3271245775976230 0.6298142492602185 0.6071097746456755  
0.4840296350458030 0.6686317383823421 0.6053008190274516  
0.4709609276978416 0.7299277455301536 0.4553052257899473  
0.1972849860620215 0.6540915884911636 0.5535739045307984  
0.2437454361996071 0.6645273805290856 0.4573791396530484  
0.6030126435895061 0.6908556990160999 0.6900777516180228  
0.6019247598344469 0.6973225612031593 0.5712375167826689  
0.4158848152022269 0.5744042100833345 0.5097836215528596  
0.3655566026792582 0.5900726294137175 0.4187857896760364  
0.250595552267027 0.7128220412227224 0.3061504065309582  
0.1877032115639491 0.6425313633748264 0.3143691181424779  
0.2769738732826745 0.6222903802851918 0.2882184705161373  
0.7058042579288661 0.4714447812558505 0.3126404784078786  
0.1949069084672979 0.3361083216466118 0.8152550003820583  
0.2058542855043602 0.8249713689282954 0.3949955027388121  
0.6919380708707423 0.9740945349857703 0.8885188968237784  
0.6944537354477838 0.3260531919775718 0.8859818476982220  
0.2066962578911600 0.4812357481614288 0.3922632643899752  
0.1982659094806402 0.9716092792971671 0.8067936656202541  
0.7046436513828385 0.8210443855722001 0.3048801494512059  
0.5925445890054004 0.4655916450540052 0.4128325666240538  
0.3075286881864719 0.3432788429986112 0.9113022530623472  
0.0947824761186426 0.8325977037377571 0.2899784686540454  
0.8068085341906912 0.9687387960759932 0.7900713163112857  
0.8072933273783631 0.3329448935294503 0.7888078231496821  
0.0953012826554959 0.4680652406687068 0.2894413986423036



0.3108786502284881 0.9807526887631508 0.9085262486460347  
0.5950245209252217 0.8395122617389532 0.4071564289454452  
0.6041693066874654 0.5411583886014156 0.2460397892827628  
0.3006515930978020 0.2757734170178055 0.7379378412175772  
0.0991503407944027 0.7588588117142974 0.4576133157590397  
0.7953921870551194 0.0400469098971047 0.9590222736958802  
0.8012864173117052 0.2607177845469613 0.9574737991405999  
0.0974665636893661 0.5443861430673589 0.4546913708372231  
0.2938865991350375 0.0524872575369967 0.7428824625747857  
0.5934601972408233 0.7599279964623991 0.2457701856773701  
0.6015026158163218 0.4063167629096800 0.2359738894566613  
0.2924115772477709 0.4116123704224821 0.7410158742762445  
0.1040526414755408 0.8938350130806629 0.4671774291660973  
0.7936410492082475 0.9047099252711936 0.9622513409303635  
0.7944637426399135 0.3953265096329392 0.9649979123886494  
0.1053098568860525 0.4107923860361662 0.4704347843231896  
0.3106169464568617 0.9199215738303115 0.7299303418789944  
0.6075363422299220 0.8935329632140354 0.2238113272160794  
0.5253274621309827 0.4451802134777759 0.5804498738799537  
0.3810308408485110 0.3512211028291156 0.0742767440965049  
0.0222597785403321 0.8586080316563379 0.1293621091500665  
0.8747482350125737 0.9380499645337721 0.6273790837391037  
0.8790509074860851 0.3610801210272942 0.6282177903578148  
0.0248794689247932 0.4381506305066329 0.1275303392387221  
0.3691769458541906 0.9435903261670736 0.0786329038432486  
0.5209868407549119 0.8650841669368529 0.5673900585231653  
0.5188878378197472 0.3534919565406895 0.4324411829150303  
0.3987824286636696 0.4414108476801366 0.9257103939957224  
0.0145547207777052 0.9400224583228627 0.2907461891851749  
0.8820203859787208 0.8569761559796636 0.7888098287330814  
0.8853614213127304 0.4416914040783659 0.7909477746745518  
0.0218117303844653 0.3562966799312847 0.2895178579138642  
0.3520046543270576 0.8558472041901192 0.9271955818063886  
0.5151688829600783 0.9462388166804421 0.4047897483329332  
0.4605168451491968 0.4708820215067410 0.4093152326794827  
0.4355602995663309 0.3147010335337674 0.89953878444058055  
0.9645793934185225 0.8176698857004060 0.3010599430601604  
0.9391526610284944 0.9757578682863750 0.7937526591159438  
0.9379110977784363 0.3200739580010719 0.7971929015245454  
0.9642973645543154 0.4759413973394827 0.2968806311542443  
0.4415522491922481 0.9551253808464345 0.9159879811261824  
0.4641575261089791 0.8254336339657959 0.3949540108754338  
0.4769790949817904 0.5095925608654626 0.7433812542657905  
0.4305845094814062 0.2776097475583962 0.2222101640090835  
0.9776347516350539 0.7772051158570402 0.9883217358508083  
0.9150875858644550 0.0210551477540180 0.4845013543017704  
0.9144016997240968 0.2735219798858614 0.4884545033917428  
0.9866450368061288 0.5208176584989467 0.9833945102508336  
0.4112814523499119 0.0279665168392225 0.216931046829801  
0.4876565834343265 0.7639581456481108 0.6919091503641147  
0.3975296617198564 0.4380422910341017 0.6246577080554232  
0.5105708383739469 0.3538975264273116 0.1135167615583432  
0.8959969830205897 0.8659945258886885 0.0751315143960152  
0.0006463988426608 0.9364655781756646 0.5722789784296817  
0.0045150313184329 0.3568107930735480 0.5701401361358674  
0.8989913572147653 0.4371434909421920 0.0708813273372320  
0.4956670384743852 0.9372661323565936 0.1388058864322399  
0.3951128635434016 0.8509389843397096 0.6186770874739334  
0.4868804681927181 0.3773301143045152 0.7396539239023345  
0.4269717251650117 0.4124155940493688 0.2377382464371799  
0.9909228596927235 0.9082232586336663 0.9497644169375999  
0.9069687150225901 0.8894104391152990 0.4481176167939589  
0.9114843426783139 0.4043765329438300 0.4466431580733496  
0.9928490755072826 0.3884233369836144 0.9493416354447900  
0.3971687682938815 0.8972890786674775 0.2581737068367533  
0.4842098510903378 0.8881197292187377 0.7562359646649638  
0.3108685003948964 0.5357155547877847 0.6786176681153435  
0.6029640649403606 0.2755030670539336 0.1971138208376428  
0.8138219378184127 0.7744346015173744 -0.0006987222855550  
0.0885443275149664 0.0247678873028598 0.5003849361547165  
0.0989079481646918 0.2770057401211457 0.4969635115532922  
0.8107794149402945 0.5258569922388752 0.0040528921913141  
0.5859431032192330 0.0250449984253364 0.2024737089848400  
0.3003779676094884 0.7852661106474741 0.7189501732397112  
0.2755800369501079 0.4388517844524226 0.5486996864660256  
0.6352912567122715 0.3631967791233771 0.0543970184344352  
0.7716105174140222 0.8581867374900461 0.1428192324218793  
0.1232423604521914 0.9418986775475789 0.6483516107804849  
0.1258272373331130 0.3574288830080580 0.6492891864990559  
0.7766789642062247 0.4399079837499574 0.1489856257039117  
0.6118843661565263 0.9482586054966634 0.0436762986287712  
0.2679357723979675 0.8609700547978143 0.5641700044078380  
0.3331192006005617 0.4434754831690071 0.3678434499991605  
0.5646793220375627 0.3357543883628989 0.8907211050174362  
0.8343005515834446 0.8253441410907352 0.3104103939783477  
0.0691790299580208 0.9738664064802572 0.8231287645184964  
0.0673511085459624 0.3179474050232376 0.8199821495142838  
0.8345571712638613 0.4723607216465260 0.3202635343203090  
0.5659702579515664 0.9672682053085319 0.8580694735006068  
0.3338009019221893 0.8290176351306608 0.3994085367972894  
0.2420711301999763 0.3529463385820164 0.4019420813825899  
0.6373256908919742 0.4474259990953026 0.8973012646226818

0.7667001346438872 0.9400308619794977 0.3032670071123886  
0.1325844966413761 0.8566321344017881 0.8045434389463397  
0.1127872959565623 0.4423420899126617 0.8045995833458054  
0.7699615560942860 0.3553086179949901 0.3066247544960457  
0.6337118181095771 0.8546458901408546 0.9007583828642400  
0.2660561556542922 0.9450788198520891 0.4067312581511497  
0.3941605728242531 0.5409357535001273 0.2736258068410625  
0.5091721414418613 0.2482657572436829 0.7683934601425952  
0.8989098501793824 0.7543487000365957 0.4428902010705170  
0.9930068957409941 0.0440353619225640 0.9417673963518465  
0.9919593246141343 0.2531371018338497 0.9469313739924566  
0.9072476155334670 0.5400867953463846 0.4465766924991663  
0.4709297650067072 0.0232196244438908 0.7520864542665896  
0.3956060827179825 0.7598683471231182 0.2626298991714029  
0.7061535135539703 0.2376463407968134 0.3117752956959574  
0.1926389231717890 0.5505080645183855 0.8081450402503352  
0.1953420765588493 0.0569907619432261 0.3874000160049265  
0.6976886013278816 0.7378925523148024 0.9163216591368716  
0.6963635191679427 0.5661800640498466 0.9192027900385200  
0.2093265002889311 0.2256326166974947 0.4110331364111948  
0.1894249013942394 0.7353410266863022 0.8012748813412589  
0.6973923558196666 0.0534434356754472 0.3053837328024850  
0.5868657662534689 0.2428953004796221 0.3923709674611086  
0.3209764924543351 0.5497739439734174 0.8981117950283297  
0.0796777375903075 0.0562838254025559 0.3036697294289850  
0.8040898100571573 0.7487607384542354 0.8018231625092614  
0.8027864941175056 0.5472785927194056 0.8053005839989996  
0.0990609033774554 0.2471371297914824 0.3017833119553998  
0.3010873308928443 0.7347469795157778 0.9059066250169866  
0.5836958810711944 0.0606439447305403 0.3982537905653734  
0.6129169515910989 0.1498867388322963 0.2538652983328452  
0.2859734657431595 0.6535930428804013 0.7465151936925463  
0.1050673767312118 0.1496141100055915 0.4422532064661880  
0.7968355602589388 0.6499531800503079 0.9379356294157908  
0.5291935376765973 0.2548871962970362 0.5699301456813326  
0.3770478948104114 0.5267550354065323 0.0762092828583125  
0.0173078521584096 0.0235913316784131 0.1348715154784934  
0.8766326534896658 0.7702924067020488 0.6374667900886246  
0.8771594784612694 0.5276482143200917 0.6403031748197899  
0.0231532059464448 0.2686037962238080 0.1396606308532044  
0.3683674990761604 0.7655424812150182 0.0703466675634079  
0.5150747628096024 0.0264371039626880 0.5636241672761499  
0.4539508196292500 0.2375281616900973 0.4095072275511573  
0.4521035709828019 0.5632835887535191 0.9222614335346114  
0.9481854790564924 0.0559827662577935 0.2971357703493072  
0.9356298665998295 0.7350336606422891 0.8077296122251441  
0.9326273127671419 0.5659345866848962 0.8124476972339915  
0.9675574216612767 0.2351226662209357 0.3137864621804780  
0.4332081235250913 0.7510475122662051 0.8966940386902192  
0.4523691442583156 0.0645668555695590 0.3990906521624825  
0.4982925925134567 0.1396617166374918 0.6624009315031627  
0.3892393189685439 0.6479848704692091 0.1600637062104003  
0.0002713853377717 0.1476377496978915 0.0666147124324658  
0.8906656198166362 0.6479758357643600 0.5605212963190426  
0.4074967234703561 0.2372259348733816 0.6390282764851990  
0.4939023465268523 0.5655138946427635 0.1475678650523483  
0.8980525804944576 0.0632224716763478 0.0780491817818497  
0.9953059098306899 0.7286801871077300 0.5742883573042311  
0.9975049770934039 0.5706070245058049 0.5839176103320828  
0.8998656594298767 0.2350243687646110 0.0876412929500276  
0.4906877012461244 0.7319576320639845 0.1280603248163499  
0.3926107149378709 0.0679494828392921 0.6081999971347622  
0.2981742155585579 0.1612871904907428 0.6315821302932492  
0.5958387297076454 0.6500911565321107 0.1305042109307412  
0.7974148578438212 0.1503005477304767 0.0707351150296749  
0.1044102204825972 0.6507953881313996 0.5724664187404469  
0.3008954691648607 0.2783090269555863 0.5387250588611460  
0.6008233091870709 0.5282531934609528 0.0461090333857390  
0.7835321795181315 0.0300084014124226 0.1581819087531802  
0.1061839992778684 0.7727226662576105 0.6563895177027587  
0.1136217724214640 0.5279038647532702 0.6518182590557187  
0.7818046671345320 0.2707654860885195 0.1542410103133265  
0.6042524009420179 0.7720150149940503 0.0479534569490512  
0.2722676734407928 0.0417046838738824 0.5462480153347127  
0.3294342286703373 0.2575776372771859 0.3461349169187835  
0.5748692580239424 0.5625751284509221 0.8532551026230720  
0.8226218274478473 0.0573945059970225 0.3489596415437824  
0.0637858057666730 0.7448781915622320 0.8437057022692114  
0.0630720234973418 0.5642023170341298 0.8297172213636531  
0.8362795098485646 0.2407136127314347 0.3321960539495216  
0.5743701438159625 0.7369797167195674 0.8560893446215491  
0.3238179330122764 0.0614141158368885 0.3613074136132023  
0.3989710261146502 0.1542095288714842 0.2754189902021951  
0.4842099497183623 0.6426232954033165 0.7675180858760791  
0.9044303647914845 0.1473012095959905 0.4292655116292727  
0.9927330013334178 0.6503077906221895 0.9366047021671648  
0.4797792473568621 0.5891711304698701 0.5656579987185077  
0.3971938678197026 0.6856741333180442 0.5948382550911137  
0.5089294673679576 0.7111626935305519 0.4917121440940797  
0.2435621227306532 0.6634304732476229 0.5327160556964677  
0.5889714336111856 0.6681188862493631 0.6277312094018710  
0.3661315032200991 0.5716814630522670 0.4874202691201954

0.6258206981424655 0.4712174165304315 0.3011853155684889  
0.2742025554184202 0.3414388315402716 0.7996144774369137  
0.1256547454699595 0.8278460735987828 0.4033364526044178  
0.7715798287255666 0.9719519563564630 0.9008458722854377  
0.7742868428909021 0.3284303577997238 0.9007993600636377  
0.1262591135465533 0.4753942320302623 0.4024413086858762  
0.2777695451579706 0.9804644941083003 0.7965198819490572  
0.6247950777142267 0.8284452389894322 0.2937983166735511  
0.5246672310592352 0.4337029237882577 0.4592698021522508  
0.3807827918501606 0.3634013057504910 0.9529506009990311  
0.0236861613769633 0.8624758315768704 0.2513601449055171  
0.8754896635709410 0.9349166995744678 0.7497241275675743  
0.8775098956082573 0.3641340539001228 0.7503995777409243  
0.0262730229506842 0.4341782845357132 0.2495587960449875  
0.3687367942329267 0.9333205069302155 0.9572911561998940  
0.5241153613865670 0.8689278239302043 0.4455258181348075  
0.4720935782790446 0.44374175816663267 0.672527837903180  
0.4366719781959124 0.3487283409989030 0.1625655273569697  
0.9713960222829005 0.8527559831734129 0.0345382778906783  
0.9246606621184078 0.9462240414172963 0.5320333048541218  
0.9279274635256689 0.3487604655548839 0.5326837457992721  
0.9752786056615882 0.4462756659007389 0.0314160195360415  
0.4194336505623842 0.9518449300113468 0.1731588398581390  
0.4715291974965887 0.8410346523270928 0.6577626293604300  
0.3202614370572435 0.4560028681031567 0.6467079505751764  
0.5874929772162492 0.3497174383695312 0.1505889942667923  
0.818995788389398 0.8505668493285119 0.0447663101782310  
0.0786473639814188 0.9497226106453420 0.5475738171708237  
0.0834502004104295 0.3504236207502223 0.5460780016380438  
0.8205437534206826 0.4495448770393417 0.0474089633678410  
0.5748990109234545 0.9508946611263150 0.1519182349806287  
0.3189553468292238 0.8538678660667299 0.6588461021501950  
0.2654267166584485 0.4297878041671440 0.4282789829956941  
0.6324237284709313 0.3686574183322617 0.9318308367477001  
0.7693377970602334 0.8619925935991978 0.2652260022066493  
0.1305587275963374 0.9355582134770765 0.7700823016083248  
0.1252318813435224 0.3643969679287796 0.7717022339462994  
0.7718001420742435 0.4340366724546800 0.2711775087496017  
0.6253351480769367 0.9346518008909604 0.9243581854616725  
0.2684890203921089 0.8665595419777449 0.4417854399290754  
0.4039189839472258 0.4657225874162326 0.3231370468945948  
0.4992552691894331 0.3203133537797049 0.8250178586113490  
0.9012366526725769 0.8231172833462658 0.3765306324858413  
-0.0022605545261582 0.9743560065854101 0.8778563677109252  
0.9974897447050274 0.3211924997631488 0.8795059708401898  
0.9045158058514177 0.4720675940137771 0.3786985994542404  
0.4906482690717821 0.9580132622407537 0.8193385016635829  
0.3977203679723304 0.8296322743481001 0.3262237937802015  
0.6273615945750093 0.2271880842545597 0.2889678355036479  
0.1176370937029319 0.0715595530375418 0.4094628222699746  
0.7769204804407374 0.7280039366827907 0.9143109108295002  
0.7762879557561729 0.5718825095957463 0.9164673574785053  
0.1284874116701058 0.2256767398455383 0.4125502787495010  
0.2694491259335439 0.7285312687180288 0.7936464116392862  
0.6200541594949676 0.0717260193584307 0.2892793471482227  
0.5223139913219321 0.2724700094685024 0.4505575335610621  
0.3851534220941124 0.5208824534995886 0.9534632362058925  
0.0151251848415707 0.0190510579222729 0.2572394031744946  
0.8743672665981299 0.7776218032000668 0.7596856697752956  
0.8740260606562069 0.5207799241022769 0.7626260667938202  
0.0281417908161885 0.2764987368248079 0.2615103049066932  
0.3660238363517481 0.7759567886233217 0.9482744773646270  
0.5169779583893834 0.0247706932597499 0.4410904680821516  
0.4852820508975416 0.2201951062500095 0.6592706012806667  
0.414604489577015 0.5703971883572623 0.1624203018252237  
0.976542636520246 0.0700680847732608 0.0546196811530697  
0.9157453949687544 0.7254419922389349 0.5538926368362634  
0.9184875117845201 0.5712660444953443 0.5577042111457766  
0.9780458974050074 0.2260771909537085 0.0599969471326878  
0.4123152304109270 0.7262893553584814 0.1537719460509239  
0.4690318636530014 0.0644717112550982 0.6471250228215577  
0.3272644604296941 0.2377756021250688 0.6375427718036656  
0.5737098627918142 0.5715085428667226 0.1420547458788831  
0.8186053975400367 0.0712138863256529 0.0664894195245692  
0.0749667584296836 0.7283979955694104 0.5653810380021941  
0.0768054783633242 0.5721458026813625 0.5661541155180223  
0.8205737571246944 0.2288984486743679 0.0666931889858640  
0.5708808486081406 0.7281191539939493 0.1377134835717447  
0.3147223979602347 0.0810377104318035 0.6325743898685687  
0.2711130895391829 0.2776674801287220 0.4246701574516635  
0.6267365081307403 0.5260775828461423 0.9294721808800038  
0.7681681171139416 0.0203331309873758 0.2780346792533689  
0.1225877560406319 0.7774718057718587 0.7770545812466514  
0.1222485217772732 0.5217546292821300 0.7754369554279279  
0.7736333698695645 0.2758500882948203 0.2765365284580131  
0.6259326591552528 0.7746935611019283 0.9288853686942043  
0.2652075648533841 0.0263049202797635 0.4259685164024165  
0.4030150262863416 0.2318834004699151 0.3142357931273170  
0.4972855599693160 0.5693485306349199 0.8202390545235255  
0.8972885385736959 0.0699869899659803 0.3901167283939277  
0.9925562103425237 0.7272973016913783 0.8941478994542676  
0.9942855204215100 0.5739360221511437 0.890852948370639

0.9053448656085730 0.2251235804382637 0.3905424841073711  
0.3962809554206408 0.0763046179268736 0.3130628526359528

Structure TS CH4/16v→21 S=8/2

1.0000000000000000  
20.1473052208878016 0.0000000000000000 0.0000000000000000  
0.0000000000000000 19.7681594983396991 0.0000000000000000  
0.0000000000000000 0.0000000000000000 13.2309279702280005

Al C Fe H O Si  
2 1 2 10 198 94

Selective dynamics

Direct

0.2759456615159266 0.5687703059525901 0.7908069168785232 F F F  
0.4934725333724685 0.7272139586615580 0.8109853692393258 F F F  
0.2457442393687561 0.6457947113154949 0.3255045580140570 T T T  
0.3244166516476404 0.6259396933788028 0.5992934939856225 T T T  
0.4795945855911768 0.6656145333079850 0.6052030292939279 T T T  
0.4741210974284799 0.7382202927234695 0.4651826813329193 T T T  
0.1931596221149229 0.6561181865620322 0.5647025664638599 T T T  
0.2378298647788752 0.6584620681642182 0.4639894273220879 T T T  
0.6020426421717228 0.6847448068140869 0.6866470257361823 T T T  
0.5994512902636565 0.6904201421088531 0.5678996803265122 T T T  
0.3809096597596879 0.5954874857010738 0.4270540233457876 T T T  
0.3017354158621054 0.6091629144954659 0.4038767667558932 T T T  
0.2594320688712169 0.6990135465204853 0.3167801262370223 T T T  
0.1928486529937495 0.6361153797177790 0.3380317482471557 T T T  
0.2673930644914123 0.6119837462073016 0.2689762364350728 T T T  
0.7044206778727613 0.4713042179476545 0.3142588060317735 F F F  
0.1950760854835707 0.3336298218685769 0.8144809228334893 F F F  
0.2064954871311571 0.8239222406909192 0.3955064231082019 F F F  
0.6924432227101462 0.9732654765623607 0.8856327410755256 F F F  
0.6943829324613731 0.3258294289242443 0.885877680280951 F F F  
0.2056313459175030 0.4814859743027284 0.3930209796268258 F F F  
0.1992266363060367 0.9716029791984653 0.8072722765152562 F F F  
0.7051435240481609 0.8206883591505658 0.3038750608570240 F F F  
0.5896063279326640 0.4668124542341019 0.4119132858031378 F F F  
0.3077334928161974 0.3449503627505024 0.9102800971500429 F F F  
0.0950433484081188 0.8317739980924088 0.2913267386510441 F F F  
0.8082772421222444 0.9702749995281366 0.7903569363241800 F F F  
0.8072685523959890 0.3328950343939354 0.7890552439135163 F F F  
0.0944219273680318 0.4680732686238755 0.2902691501762931 F F F  
0.3120119529221483 0.9812397464464695 0.9082284308728887 F F F  
0.5951415733024135 0.8388377912365002 0.4055311613376560 F F F  
0.6031629857194218 0.5414456128752647 0.2458837828940403 F F F  
0.3024609537199083 0.2760901795214465 0.7378128619011051 F F F  
0.1001178653927539 0.7579641934052788 0.4595445747276159 F F F  
0.7938287668214770 0.0404742937207061 0.9601419655075603 F F F  
0.8013667792403822 0.2607809535400989 0.9578856284983814 F F F  
0.0966647534877652 0.5440826557424572 0.4561589774177364 F F F  
0.2943466933030336 0.0525947622026735 0.7422949861573969 F F F  
0.5940403918909496 0.7593862449268727 0.2444281078739508 F F F  
0.6006681230479671 0.4064098948159725 0.2360208792158573 F F F  
0.2897440097541164 0.4117266835952833 0.7385892858892618 F F F  
0.1050445223363710 0.8929689339481612 0.4681767521639415 F F F  
0.7944917117849073 0.9050789370243777 0.9610752033398029 F F F  
0.7939158781778914 0.3955218407269427 0.9645713096103563 F F F  
0.1051367521927347 0.4100903955444224 0.4705561942041783 F F F  
0.3113024875243937 0.9200906900313228 0.7293498851416444 F F F  
0.6078371389270103 0.8930106632350814 0.2224711026012827 F F F  
0.5255923085639864 0.4454927906140540 0.5814942914198156 F F F  
0.3812814272601983 0.3522308954821369 0.0739048087804548 F F F  
0.0220106762559240 0.8577843797031335 0.1307263871725937 F F F  
0.8757866711585365 0.9380993923368806 0.6281203704519527 F F F  
0.8786223726186009 0.3608812768563752 0.6285465212419084 F F F  
0.0230049924843172 0.4392971886346828 0.1286996032129082 F F F  
0.3700643208499841 0.9426478659133508 0.0787829922315595 F F F  
0.5232025772332207 0.8650029925532507 0.5669501344861629 F F F  
0.5175569482497409 0.3540124859210394 0.4335062308685522 F F F  
0.4005556007943980 0.4417032202283764 0.9252344352107826 F F F  
0.0155753740040083 0.9399475585055725 0.2911178244297616 F F F  
0.8816512998799126 0.8572016178288635 0.7898202932933245 F F F  
0.8850928705467069 0.4420432242846815 0.7906008743649480 F F F  
0.0203912427340143 0.3566929895484421 0.2897727917417185 F F F  
0.3516679745699491 0.8559218084307219 0.9267333406935094 F F F  
0.5149602837606935 0.9457447672101793 0.4034180136176104 F F F  
0.4566213093042890 0.4702437396198036 0.4140541220270322 F F F  
0.4351289127799802 0.3144386479444137 0.8988950207438720 F F F  
0.9651079065029151 0.8176124834636269 0.3034355119298766 F F F  
0.9405796625526222 0.9753181188930000 0.7942641676396818 F F F  
0.9379684178425336 0.3206313570969357 0.7975195060171458 F F F  
0.9637881160021493 0.4769481260713135 0.2992936367127328 F F F  
0.4421296362232425 0.9541728324920626 0.9155927050557011 F F F  
0.4643012589138991 0.8237753591931281 0.3988465932103153 F F F  
0.4767970103311399 0.5093481578169090 0.7440250325471069 F F F  
0.4300462138528189 0.2764286686644155 0.2199411993216884 F F F  
0.9769046939562713 0.7771554166107393 0.9885821272995514 F F F  
0.9165685264708614 0.0218103614105800 0.4862874610827035 F F F  
0.9142105047033908 0.2737420877566805 0.4883576448160056 F F F  
0.9829261801176230 0.5215713123671932 0.9845444803241605 F F F  
0.4119740187122503 0.0276202095484877 0.2162605284906221 F F F  
0.4888866529684464 0.7637225198847233 0.6884105949572685 F F F  
0.3982915771046152 0.4346014396093167 0.6285697647906048 F F F

0.5108695032774691 0.3530696745854769 0.1126515857739179 F F F  
0.8956900187996055 0.8657047477548758 0.0760236277933899 F F F  
0.0016149703422030 0.9362137838733133 0.5725113438281113 F F F  
0.0040467677359288 0.3568738273544838 0.5700661204148574 F F F  
0.8968500479862698 0.4373604971448231 0.0734305722661759 F F F  
0.4970679939828457 0.9382781623321037 0.1363007666697484 F F F  
0.3971007686098247 0.8526013911150869 0.6186900845612655 F F F  
0.4907854013487238 0.3775907749271497 0.7422082883999721 F F F  
0.4287634971737262 0.4106891140544349 0.2396511979669498 F F F  
0.9910077922582445 0.9083193120593407 0.9517190657470564 F F F  
0.9071525486576348 0.8904943494510391 0.4482940763806695 F F F  
0.9104465839748102 0.4049090315195798 0.4476507556753191 F F F  
0.9908917978470484 0.3891905724490741 0.9509272842695893 F F F  
0.401083898904553 0.8969037668750843 0.2587289766698504 F F F  
0.4872304327624306 0.8877640394278998 0.7564158704288459 F F F  
0.3127235510028257 0.5353391997668666 0.6754819674782340 F F F  
0.6039155585792528 0.2756811225351825 0.1965691520221000 F F F  
0.8120273468632462 0.7748621812909349 0.0011704340070224 F F F  
0.0895373111192939 0.0242258607391292 0.4997640757754809 F F F  
0.0991594388560983 0.2765797467989515 0.4990603861576304 F F F  
0.8078871026267009 0.5256749894131829 0.0063598045357978 F F F  
0.5875547808133774 0.0247556569145999 0.2028654587854035 F F F  
0.3030988772272210 0.7852361383914896 0.7185937992424414 F F F  
0.2791128030810341 0.4393754725137455 0.5447995595809800 F F F  
0.6356721376685286 0.3640766521861352 0.0544265257197338 F F F  
0.7707203552338697 0.8610704376819101 0.1420786406936756 F F F  
0.1241721248372940 0.9421513678253675 0.6487535458622489 F F F  
0.1248633466609022 0.3581214816118177 0.6506236455636909 F F F  
0.7734378570260247 0.4382505419623044 0.1489203225559308 F F F  
0.6138760502715854 0.9490877776561106 0.0430006160288983 F F F  
0.2701474593987783 0.8604081087115247 0.5631215306856916 F F F  
0.3311435076659706 0.4467095151961757 0.3601794979828341 F F F  
0.5649308458260265 0.3311621004831622 0.8935576105664751 F F F  
0.8350369195691059 0.8289922847855635 0.3076762596504423 F F F  
0.0703409337454843 0.9721439884265735 0.8244435579080900 F F F  
0.0671872006810617 0.3194696948045745 0.8224438323674264 F F F  
0.8337524711500919 0.4699143855025554 0.3174520736288997 F F F  
0.5660431576991627 0.9700361143690159 0.8585910905140253 F F F  
0.3343389513995092 0.8284401791575888 0.3962524891180834 F F F  
0.2432134979714746 0.3535162641846199 0.3999110031477429 F F F  
0.6335467185511874 0.4459741948266540 0.8943549133295079 F F F  
0.7631993417354863 0.9412704416988475 0.3042256795948859 F F F  
0.1351477138028301 0.8557616630412568 0.8035971297340652 F F F  
0.1163226612717736 0.4424221922080918 0.8075944003168658 F F F  
0.7665940489084022 0.3542468305811113 0.3075513984840086 F F F  
0.6307015070840549 0.8554195595551874 0.8986363609478047 F F F  
0.2663047723143350 0.9443308128924244 0.4062088174758145 F F F  
0.3999665791742615 0.5408572887042524 0.2709087428388912 F F F  
0.5077580573974387 0.2471603708696932 0.7677734374813738 F F F  
0.8947392404129388 0.7556483079262506 0.4419750513733760 F F F  
0.9948037663428835 0.0440182542322063 0.9417147646561759 F F F  
0.9917400917031003 0.2537936502739910 0.9476277891287452 F F F  
0.9016912762696379 0.5405426093727215 0.4452152752338634 F F F  
0.4696131057107280 0.0224464376056730 0.7508388076051560 F F F  
0.3989181518413361 0.7599341517302136 0.2601214240244971 F F F  
0.7062219294748786 0.2348817162943320 0.3106690578640254 F F F  
0.1929794924006671 0.5528543438533831 0.7984180447262688 F F F  
0.1958921178640765 0.0565646137762172 0.3860558650878829 F F F  
0.6982027373854862 0.7405609591341360 0.9085887046543561 F F F  
0.6959624033807614 0.5638970187380608 0.9113361728489622 F F F  
0.2092956925121356 0.2265287582488469 0.4103264599125396 F F F  
0.1907722226589783 0.7338428546511082 0.7929537538721689 F F F  
0.6984217303020586 0.0574991817934958 0.3046746105710412 F F F  
0.5878249077876987 0.2451802675866617 0.3926540835179040 F F F  
0.3178537253646780 0.5456598575784852 0.8973272728031461 F F F  
0.0796611430512399 0.0568283220478776 0.3036095848015776 F F F  
0.8086116803266563 0.7457832307196952 0.8041340477769836 F F F  
0.8056573407344914 0.5495459252211674 0.8075269693142317 F F F  
0.0983836808850285 0.2479639569118604 0.3033648042444526 F F F  
0.2995683462194307 0.7355804062980837 0.9053863736632053 F F F  
0.5849273465850331 0.0590785638732285 0.3991177155671366 F F F  
0.6097418234522820 0.1501960971896139 0.2553323217112080 F F F  
0.2899930601564762 0.6529755988285757 0.7474544134360102 F F F  
0.1060238030391432 0.1494547748192971 0.4424529397683301 F F F  
0.7936472270417312 0.6499892796228579 0.9428335466227367 F F F  
0.5291386276775967 0.2547060447652782 0.5695369360336926 F F F  
0.3763102821402313 0.5270963578974772 0.0750169333817681 F F F  
0.0171791175270215 0.0236877620233642 0.1352297639955324 F F F  
0.8767270898382691 0.7712119643315702 0.6374824680228031 F F F  
0.8752608047949977 0.5281356834443898 0.6397812387496700 F F F  
0.0233664894125596 0.2686750662759181 0.1402166882829974 F F F  
0.3694720199583728 0.7649971566383229 0.0682154134848361 F F F  
0.5145024564691099 0.0251822889005311 0.5630509701833404 F F F  
0.4550121685846378 0.2371221319404100 0.40747807688038480 F F F  
0.4482787990399331 0.5661321215751869 0.9191248641152470 F F F  
0.9481010066114450 0.0554707371352379 0.2976464854129262 F F F  
0.9409755143052436 0.7376160148370019 0.8037600506071243 F F F  
0.9362307309223610 0.5650888633798772 0.8079093709974643 F F F  
0.9669851821599664 0.2351666512408954 0.3134736432562235 F F F  
0.4316582935828990 0.7510370460487508 0.8917873225497317 F F F  
0.4535210261142737 0.0647627469982339 0.3978102697222425 F F F  
0.4987714332537720 0.1388671957913701 0.6609729450483002 F F F

0.3926572624384335 0.6479793405543361 0.1576140530639378 F F F  
0.0001725257019132 0.1478510444903662 0.0665678877059079 F F F  
0.8869529781919923 0.6487985983629798 0.5590023261172377 F F F  
0.4073741094334977 0.2358227903231622 0.6361110882220089 F F F  
0.4956260284681946 0.5639225250904403 0.1379082588703753 F F F  
0.8983191413360245 0.0629488151542077 0.0754871313043850 F F F  
0.9930884441516596 0.7278979472529485 0.5681408635533245 F F F  
0.9940610664133516 0.5715746868344809 0.5788048805047694 F F F  
0.8999193736377933 0.2354029752121676 0.0883452692421542 F F F  
0.4927175963971422 0.7332195805762609 0.1228283074163912 F F F  
0.3923514938724395 0.0686641994234307 0.6066254183147848 F F F  
0.2972839931482056 0.1613955174632764 0.6308441836538776 F F F  
0.5969278454901144 0.6497793950128354 0.1291566211527524 F F F  
0.7977670262385885 0.1505101322304654 0.0717346447957752 F F F  
0.1016384354333439 0.6501254409110402 0.5762187135348711 F F F  
0.3002383015529233 0.2788895379186513 0.5387519162476266 F F F  
0.6056945008656669 0.5273637015873618 0.0465224745959105 F F F  
0.7851837545166802 0.0303224512789981 0.1598017292197653 F F F  
0.1007387039370045 0.7725356098765133 0.6588389214206458 F F F  
0.1066497774129331 0.5258644405854440 0.6536382754987713 F F F  
0.7818432928754788 0.2710969862040784 0.1545204920917342 F F F  
0.6082125960114695 0.7714717334519676 0.0471521369313450 F F F  
0.2720343448765234 0.0414360564037466 0.5456509244573482 F F F  
0.3300694557745416 0.2573203517254257 0.3466304603746835 F F F  
0.5726497157150661 0.5632327778395876 0.8565995462156266 F F F  
0.8230160967269029 0.0563686152638283 0.3516624373547685 F F F  
0.0677748370298943 0.7445223128932099 0.8508022178419594 F F F  
0.0655372785549488 0.5633329307989996 0.8374373463393283 F F F  
0.8358522829239590 0.2410471335883742 0.3327700855904254 F F F  
0.5731584206259939 0.7364692655791529 0.8571950287847443 F F F  
0.3246938177754828 0.0602363114065056 0.3613612584407306 F F F  
0.3987088753276424 0.1536706817325566 0.2748815287203286 F F F  
0.4845571551372885 0.6427164715275708 0.7638960466114638 F F F  
0.9044804759832843 0.1474777114703230 0.4293724206307203 F F F  
0.9915986823889185 0.6505821412793935 0.9360427646978025 F F F  
0.4757432484793703 0.5865045194529976 0.5695400937429116 T T T  
0.3948293872235289 0.6853323738476204 0.6002561694945132 T T T  
0.5035196789630089 0.7009007791930132 0.4854132104857254 T T T  
0.2388579184274594 0.6643181401324185 0.5402628682986768 T T T  
0.5866199444617223 0.6619640292187218 0.6252241038539332 T T T  
0.3369475739809549 0.5904112063058009 0.4576674835636907 T T T  
0.6244310717570798 0.4714659147420619 0.3013640962941579 F F F  
0.2741973412749843 0.3413119005553611 0.7987852712983496 F F F  
0.1263850810749787 0.8267544507229800 0.4044457572525957 F F F  
0.7719343540554888 0.9723825362200316 0.9003014605693949 F F F  
0.7741602909168890 0.3283221956762787 0.9009143225836027 F F F  
0.1253311090862610 0.4753052601808889 0.4033295550001412 F F F  
0.2786634597552720 0.9805602753823592 0.7962892815525890 F F F  
0.6253030984425862 0.8279396859711241 0.2922967727010999 F F F  
0.5226930475465537 0.4342112134680534 0.4603782152074913 F F F  
0.3811826693080391 0.3639820318918296 0.9523876035395560 F F F  
0.0241590552896724 0.8620587697886535 0.2527291733389987 F F F  
0.8764443441851029 0.9351797901108867 0.7504249993185326 F F F  
0.8773521827846977 0.3643614529881134 0.7506343779312274 F F F  
0.0250961105480911 0.4347842277591027 0.2506898214729745 F F F  
0.3691866177378174 0.9330270371163394 0.9571910029542323 F F F  
0.5248936585805524 0.8689932306656303 0.4450528449947910 F F F  
0.4731231027123286 0.4428975141657645 0.6744244254098248 F F F  
0.4370439982953940 0.3480792237776029 0.1620108900575090 F F F  
0.9711891152665189 0.8524785510507371 0.0357986298815192 F F F  
0.9256265625556281 0.9466011759014634 0.5328182095468108 F F F  
0.9274262156036741 0.3489289769344310 0.5328860970079603 F F F  
0.9729335506399153 0.4469713381183880 0.0330660027326530 F F F  
0.4209795269387726 0.9515984432763887 0.1724523935149449 F F F  
0.4733813765492556 0.8415395122539522 0.6574146572518700 F F F  
0.3211722581912042 0.4548973664275096 0.6457825635490551 F F F  
0.5877492068874233 0.3497824647586967 0.1502491096102219 F F F  
0.8186015903911681 0.8513034618818338 0.0449957403605907 F F F  
0.0796616687553779 0.9493446222462723 0.5477277162885343 F F F  
0.0830677040226178 0.3502811910460935 0.5470425157338212 F F F  
0.8184271242812997 0.4492352668979152 0.0487370778299692 F F F  
0.5762624491746990 0.9511666110944788 0.1508348794623160 F F F  
0.3206504998344926 0.8539836272004351 0.6584832941514662 F F F  
0.2657376328843952 0.4307440166593253 0.4250831462113069 F F F  
0.6317719922235767 0.3675083538947561 0.9316965802872090 F F F  
0.7686461316747639 0.8637731802474917 0.2645047400744716 F F F  
0.1319146498461308 0.9348685719229550 0.7703313250180699 F F F  
0.1257480174824934 0.3644038809880215 0.7731137905844108 F F F  
0.7695179700777146 0.4327710489688954 0.2712640931298509 F F F  
0.6253335677373855 0.9355294779871812 0.9230852109941097 F F F  
0.2693847736536767 0.8656584473618736 0.4407320683945386 F F F  
0.4043632487755815 0.4658236053646121 0.3214912835404746 F F F  
0.4996789899738374 0.3188578547147145 0.8258985881379246 F F F  
0.9006723559985232 0.8244828001841356 0.3763449929993712 F F F  
0.9988834429815512 0.9738201711476933 0.8788268970119120 F F F  
0.9969545199407008 0.3221419512125152 0.8808252244383752 F F F  
0.9026133935561731 0.4719580185084027 0.3785429102021567 F F F  
0.4911771542993364 0.9582252434623371 0.8190666240421933 F F F  
0.3994039336377782 0.8287433918583389 0.3256637893557865 F F F  
0.6270263511094569 0.2271877372880908 0.2889873882864151 F F F  
0.1182952485888293 0.0714236598831164 0.4090649340296793 F F F  
0.7770306577869874 0.7281518102401634 0.9147964479144619 F F F

0.7755872772036412 0.5718972575436680 0.9171814853727440 F F F  
0.1284942233927779 0.2259179128877662 0.4133952956184714 F F F  
0.2710961755215564 0.7277090975629079 0.7910955668459252 F F F  
0.6202760908890355 0.0722342561868956 0.2898087104527747 F F F  
0.5223661713386463 0.2730062801086888 0.4503555491177096 F F F  
0.3836641430479091 0.5206963417173966 0.9522224664292622 F F F  
0.0153019868037276 0.0189961380333301 0.2575892712219030 F F F  
0.8767930095390284 0.7777692773878968 0.7597952613062589 F F F  
0.8752328744152607 0.5213008972505193 0.7621284444565717 F F F  
0.0276187233025311 0.2769162110977490 0.2620864778974124 F F F  
0.3653907580336266 0.7758250773449191 0.9463194171620515 F F F  
0.5173615518897421 0.0242206612981875 0.44056663909831716 F F F  
0.4850369677123183 0.2193427021541154 0.6580354020666306 F F F  
0.4169862045109767 0.5701449340522231 0.1587921374351637 F F F  
0.9770216519033994 0.0700984632597752 0.0541539290474446 F F F  
0.9132616001900900 0.7258814245265910 0.5518484829571051 F F F  
0.9148472190262353 0.5720737972055532 0.5556427709642904 F F F  
0.9780730357450196 0.2263502513736384 0.0605376660431176 F F F  
0.4146515835945692 0.7264975923723327 0.1508202086685628 F F F  
0.4685814823443550 0.0639871929975016 0.6460176049590132 F F F  
0.3271663639502407 0.2376289274549066 0.6365829893965085 F F F  
0.5753745069219889 0.5710351137681471 0.1397057621947226 F F F  
0.8187931238097192 0.0713952718471234 0.0668126248508045 F F F  
0.0728215570888935 0.7278674875787203 0.5657992751604084 F F F  
0.0736498474497509 0.5717990533637831 0.5665396988107005 F F F  
0.8206870440831651 0.2291347029694322 0.0672192689803515 F F F  
0.5726716476671783 0.7280332856874026 0.1354572889033179 F F F  
0.3143997869872805 0.0811593541178297 0.6316950552397955 F F F  
0.2713707093631967 0.2781011829013025 0.4240801614808731 F F F  
0.6263601508898944 0.5248906135747120 0.9275973973409748 F F F  
0.7681531015828753 0.0214640621635382 0.2791974253794436 F F F  
0.1233942632846663 0.7766426017666177 0.7771554779055592 F F F  
0.1220819547254521 0.5217374217555388 0.7757354209620217 F F F  
0.7728344166293226 0.2750734491404643 0.2767440644205266 F F F  
0.6259396501471741 0.7752139134982485 0.9265822981259717 F F F  
0.2655031453022616 0.0255371129402775 0.4253602010498838 F F F  
0.4032784842190154 0.2313541097662437 0.3132840267451229 F F F  
0.4959246192663969 0.5698942571843588 0.8198313941177915 F F F  
0.8978434692314607 0.0698797883140543 0.3913430997575844 F F F  
0.9945033276856847 0.7277991876310566 0.8948013476086203 F F F  
0.9945862965964878 0.5738769209865069 0.8918803360335872 F F F  
0.9050160609560010 0.2252649157393449 0.3906278319707113 F F F  
0.3967852016545876 0.0757859517330672 0.3124883439764190 F F F

Structure CH4/16vvv S=8/2

1.0000000000000000  
20.1473007202000005 0.0000000000000000 0.0000000000000000  
0.0000000000000000 19.7681999206999990 0.0000000000000000  
0.0000000000000000 0.0000000000000000 13.2308998108000004  
Al O Si Fe H C  
2 198 94 2 10 1  
Direct  
0.4819594628699726 0.5746359884426538 0.59305155822492764  
0.6984335265474655 0.7371274731260670 0.6210183895319805  
0.9120097707475014 0.4726828696551894 0.1206102429811604  
0.4014567598163345 0.3324853336944532 0.6202706821114129  
0.4141157986285308 0.8238893963484675 0.1967051270077816  
0.8985217926777802 0.9782311466566156 0.6851450115617933  
0.8995846679870380 0.3269802926915163 0.6948094067596577  
0.4115487209914542 0.4839515903325641 0.2104155472856925  
0.4064517746519576 0.9632866835791355 0.6110605526886833  
0.9137751499195300 0.8236264076545921 0.0999426795099968  
0.7995167666547808 0.4648304060105878 0.2265215549032507  
0.5111292751877551 0.3489390538779087 0.7263622305604267  
0.3022855082278767 0.8319914995402738 0.0920122824455551  
0.0142434282522457 0.9744692710139946 0.5868767053879089  
0.0109431124402009 0.3357310873881819 0.5914729646636344  
0.3027976272278439 0.4673475809341738 0.0949157216703116  
0.5176824594495920 0.9728052205618233 0.7145392469414001  
0.8042695524918460 0.8494585506092379 0.2002035599673089  
0.8054706845891060 0.5395053864285783 0.0619497562678637  
0.5131362202186370 0.2761857247250362 0.5559642657401346  
0.3088059219840769 0.7543379202417325 0.2572894764072806  
0.0009608303501635 0.0454689337954208 0.7571349812321148  
0.0083700427603575 0.2647811606486344 0.7613819594970972  
0.3003416027649841 0.5434713623899795 0.2608404853854243  
0.4983329041030433 0.0512326352414871 0.5561917035988507  
0.8019547064654119 0.7587071580753389 0.0529086404891617  
0.8076640375864188 0.4041194375670109 0.0495120771144569  
0.4983808642580341 0.4117526288264477 0.5526028610622000  
0.3104901092989255 0.8893337929741680 0.2715773615086441  
0.0033528261824605 0.9106026561678391 0.7573015465754583  
0.0000531456871028 0.3999992677257086 0.7644826346481862  
0.3087851080979909 0.4087734786956687 0.2739411958613728  
0.5224230524291773 0.9213440166230313 0.5302508757214816  
0.8153419433921506 0.8893875141575430 0.0085551152913769  
0.733153855581966 0.4600789865617868 0.3958775778133190  
0.5868264708283596 0.3617180940801796 0.8882369322231198  
0.2269779984252008 0.8544036606253699 0.9321052378791544  
0.0839457836624448 0.9404380780885585 0.4279867573034392  
0.0842069502521458 0.3589155442154192 0.4323232153769569  
0.2260074816594995 0.4498484993347485 0.9345563277857137

0.5810026605561328 0.9595536799316901 0.8845760051573164  
0.7328290740123256 0.8570219481209879 0.3630149312201283  
0.7237754629184077 0.3569558568536191 0.2666258654553925  
0.5950568230721163 0.4548846116724195 0.7444770948077926  
0.2227206646110966 0.9405668656583103 0.0873704870725566  
0.0824214502827491 0.8576560005138106 0.5870011641647572  
0.0880845376759546 0.4456741363558346 0.5867957001944532  
0.2229221896360410 0.3597716887875299 0.0855883463836998  
0.5508067720277272 0.8500242367578115 0.7778105935940340  
0.7165320685300993 0.9500504423263227 0.2192147114331688  
0.6658169837574830 0.4734473291943193 0.2270989044325986  
0.6396343387234340 0.3316582462425755 0.7094405167691016  
0.1724369940186095 0.8179619575919104 0.1082904623649818  
0.1467062250609667 0.9734913207488375 0.5970489347013528  
0.1418785884564756 0.3252412974204642 0.6062032002347013  
0.1724817493800744 0.4820518495555824 0.1125131557481877  
0.6456923786199578 0.9344600920707727 0.7162572631772572  
0.6742862756375492 0.8260660830882106 0.1875637299290130  
0.6785942378399095 0.5218694054112019 0.5506292973625047  
0.6296621796480962 0.2756678842999149 0.0254398846694748  
0.1843439385531008 0.7790255211282361 0.7818703083541352  
0.1224729556208012 0.0246004761109000 0.2860121385797171  
0.1215730330341716 0.2751011297721157 0.2896218084797994  
0.1811206080835516 0.5243593808372293 0.7834851058014147  
0.6262870958195812 0.0384264633057988 0.0283352413700738  
0.6932018223012517 0.7620780736885995 0.4904885130610331  
0.6074377610295805 0.4336656286306707 0.4443683618222268  
0.7162297875687998 0.3522258688564104 0.9268195967228798  
0.1016690853608391 0.8648796404394105 0.8724464786872191  
0.2098699117008507 0.9419685187534145 0.3714319967854551  
0.2106411662371017 0.3549669857096578 0.3788133636242033  
0.0993832467853265 0.4412931711004093 0.8809359314697632  
0.7069966281030281 0.9490531928137950 0.9402231695146144  
0.6061003783781475 0.8541495168628588 0.4152511211503278  
0.7071283653694660 0.3912096570751227 0.5606884561622891  
0.6373463962700968 0.4072698439143672 0.0612302281951991  
0.1997120756308461 0.9107563910121919 0.7558337434039564  
0.1153093529619042 0.8931115207215654 0.2494269937059149  
0.1191661570058964 0.4075056302096051 0.2563509477810515  
0.1947945882952886 0.3915362779592880 0.7617284368397838  
0.6094484730363628 0.9086027998352539 0.0628799296412518  
0.6996570533034535 0.8865765562338417 0.5505665670008064  
0.5243733461940829 0.5354851634133225 0.4900284637764094  
0.8077871286411222 0.2729051714838948 0.0103124765206353  
0.0126049111907628 0.7793226539481271 0.7997279162040994  
0.3035995249743507 0.0229688672935085 0.2965975995980298  
0.3059600951466121 0.2751727648734840 0.3077422009247034  
0.0082496048352772 0.52883358454470418 0.8168717472527737  
0.7994961552617599 0.0228795867479513 0.0294157937972867  
0.5157986936887484 0.7886360992830265 0.5227249164668366  
0.4862488310427150 0.4402330831301981 0.3612839741105143  
0.8412382760596235 0.3600377796748699 0.8676552644919709  
0.9758741833297718 0.8691276802836134 0.9373091124399555  
0.3313003059181741 0.9431444704215109 0.4501435174275579  
0.3324479762717216 0.3604101131804824 0.4555547850064887  
0.9738646515634382 0.4357801212002589 0.9502175617017775  
0.8240209136073422 0.9703539005751539 0.8510937152442366  
0.4775605284955996 0.8606103433135449 0.3654950491179563  
0.5384918523453330 0.4441944972714404 0.1776515033471932  
0.7704280476899125 0.3273756483359895 0.7068890525773007  
0.0441707082997416 0.8422299356747223 0.0990619247514906  
0.2770228816006794 0.9754755087110684 0.6257947367355502  
0.2718493233376446 0.3287235714706433 0.6271584342677398  
0.0434888634556184 0.4575621636145055 0.1106418776750546  
0.7702711697073186 0.9646529820143521 0.6693764471540252  
0.5433736304438673 0.8378098936865961 0.1967734816591417  
0.4456379602644989 0.3563294018168090 0.2175171517869257  
0.8361459234693006 0.4443830663671599 0.710889208511386  
0.9626732955118030 0.9476172309963803 0.0998971345977699  
0.3321954678644555 0.8545446260412677 0.6033359870393312  
0.3325385074526670 0.4468439813313423 0.6107402942226863  
0.9631527059914631 0.3515645005631555 0.1084761909480611  
0.8451896307669104 0.8617734703287937 0.7366601350923833  
0.4648082350804798 0.9466516966730357 0.2151400452741529  
0.6036264994965923 0.5370483489806425 0.0811201030271543  
0.7026221696259863 0.2570810963155749 0.5763515190345460  
0.0879178319092781 0.7607899642384781 0.2369373779039447  
0.1987026587549912 0.0458679288324542 0.7429397906313961  
0.2004961225878170 0.2564473661671527 0.7503524599045006  
0.0895380163226480 0.5397229239299735 0.2437366301025894  
0.6720969395871736 0.0190375422012089 0.5671550564328616  
0.5993160691833390 0.7745723274009122 0.0456597072918313  
0.9126094624704666 0.2294498146337829 0.1173112320124191  
0.3971635406470140 0.5632460940704028 0.5778772212090073  
0.4106469899060871 0.0667886055805453 0.1921497325940464  
0.9021427972080842 0.7447260431205318 0.6961954618427307  
0.8990151498986307 0.5621703961757122 0.7105365497922655  
0.4153931691645726 0.2282026825895785 0.2148117015481797  
0.3976158952670126 0.7381272250107479 0.5782322110017117  
0.9099877531270777 0.0682850676029900 0.1193953873303039  
0.7990133451058080 0.2546214771950284 0.2096772298004482  
0.5123571963446722 0.5575419837806623 0.7108573817508357



0.2975932689398405 0.0513692553434834 0.0999458218627581  
0.0176304822247737 0.7410512058446415 0.6065996259699372  
0.0135705795123113 0.5546884993763677 0.6186560634423485  
0.3049334547310820 0.2547148431926996 0.1098284234090972  
0.4988603708797199 0.7370737744212973 0.7042355432699741  
0.7993810834116875 0.0545502449075929 0.2248606498016781  
0.8088456132564730 0.1501061375948026 0.0835294218023197  
0.4992542683391122 0.6568210927462436 0.5419210339470223  
0.3109021098418070 0.1497796148765571 0.2371823699666509  
0.9916643130085759 0.6528921949316806 0.7526433437861969  
0.7350586906160748 0.2472648907474968 0.3821827991167630  
0.5737989855741618 0.5488549940561065 0.8878417319595444  
0.2278152359710081 0.0283489932976224 0.9352089102661678  
0.0762839980362728 0.7704069678208061 0.4350373643528209  
0.0688631582694014 0.5371243862629407 0.4415812472327085  
0.2341011256550589 0.2661261190780965 0.9424725109137602  
0.5756425461669042 0.7308982166373611 0.8619263665229805  
0.7202357545522098 0.0291857829575498 0.3817083147630418  
0.6661299404340675 0.2430461955245907 0.2123355716336726  
0.6439408829966294 0.5776496861554423 0.7268908808964386  
0.1665310180150006 0.0615843513754386 0.1044667985105942  
0.1498979318310931 0.7422298072307296 0.5952344870178666  
0.1457685360218030 0.5646982328146318 0.5987439386649064  
0.1735167788303743 0.2374323823126442 0.1140547084839225  
0.6290688032272571 0.7615638832067222 0.6842139686144991  
0.6694487614493673 0.0749937132295066 0.2103291432743304  
0.6987557483240900 0.1399245157745670 0.4904929210137656  
0.6284555087023910 0.6504342653920253 0.9984367460640631  
0.1924407043641351 0.1494110368792296 0.8677070630806116  
0.0979546517305154 0.6518392380878275 0.3499477498653977  
0.6100574413602561 0.2349493453213353 0.4359210251075647  
0.7001502685871664 0.5438116035607902 0.9415553597367305  
0.1034018926432415 0.0501757471261597 0.8832357169254685  
0.1932937971808215 0.7467471393147778 0.3512971987510918  
0.1895126977598274 0.5542112118828462 0.3683582788821847  
0.1074428104704094 0.25152056866340700 0.8931995570187679  
0.7016102014723579 0.7492474983303629 0.9214391932934903  
0.5968795278117166 0.0692262565201769 0.4215730777556212  
0.5006310131874327 0.1609921590560464 0.4487819869632212  
0.7860251559949178 0.6466030616946096 0.9475690014763479  
0.0185640177661389 0.1531733227817891 0.8687035775845661  
0.2818854810960681 0.6498574993757947 0.3791504435612046  
0.4965830647990211 0.2788676508804750 0.3582334605803525  
0.8200684910843894 0.5289337781534987 0.8644224773751927  
0.9822106750222582 0.0385697577513858 0.9561925519353032  
0.3007137157063911 0.7727046861100787 0.4549691196249982  
0.3009853723741128 0.5270065187710065 0.4585986161153195  
0.9844831922385019 0.2676705582398413 0.9576667968309712  
0.8269282471183289 0.7582407116056878 0.8579262959442142  
0.477279963979291 0.0415230050781112 0.3585568552216566  
0.5388270820965321 0.2666617168259390 0.1696085753242518  
0.7716249213686447 0.5599217256247989 0.6823994508179327  
0.0381415999341003 0.0554405483747419 0.1373822620077988  
0.2759609201039236 0.7377657668971538 0.6475038795469529  
0.2733358006579893 0.5627690695680830 0.6492617324723364  
0.0424808899101336 0.2451282431207127 0.1345330727641253  
0.7731549820591460 0.7568568428205520 0.6735845871537610  
0.5411493966900217 0.0522742209474084 0.1825116218102953  
0.5978397677259975 0.1578681894726034 0.0983069749532037  
0.7010229850394765 0.6500060885859690 0.5833550893013506  
0.1097157690550658 0.1496736505028047 0.2284214083805158  
0.1920731957228877 0.6520604276370507 0.7316554832338940  
0.6159265987801866 0.6415592711379574 0.4145017339345685  
0.5141328281331777 0.7013640299125019 0.3376672197190936  
0.7210065037316581 0.6782485284980454 0.2975284922234540  
0.4221010570985745 0.6057217051820948 0.3783837393469695  
0.7982709985547529 0.6323622034454826 0.4404524225778154  
0.5367113441212149 0.5770723431180572 0.2815105215914616  
0.8313984655435072 0.4697977609761180 0.1137743468800666  
0.4811708190633266 0.3418181334225106 0.6124564745083544  
0.3338471521582235 0.8246236879957231 0.2051263902212834  
0.9785283247996032 0.9773659312234628 0.6973330539515954  
0.9795951324774806 0.3314079993287420 0.7045151070003602  
0.3306309959778545 0.4750570511067455 0.2100391339844855  
0.4853896039426264 0.9762651169166896 0.6025441221916075  
0.8336342753945353 0.8303587110530559 0.0894672820477737  
0.7307979747929416 0.4381663561385445 0.2776125515264325  
0.5829742675394388 0.3750948264765726 0.7673872429380287  
0.2310154790513996 0.8614792012338758 0.0538635620439357  
0.0818725736965896 0.9364050385040211 0.5499239629078698  
0.0815958953693057 0.3666248974813617 0.5537419373306154  
0.2308351008468430 0.4393647855636894 0.0557767693096794  
0.5741008224581338 0.9283512138459725 0.7719084908947998  
0.7316744854416066 0.8705769533404196 0.2425678221374254  
0.6810195866618098 0.4514573677919475 0.4887111991340795  
0.6419911112422603 0.3493067532566917 0.9754587405287277  
0.1778468828895214 0.8525113581840521 0.8349421261193365  
0.1336036188494525 0.9497977572839587 0.3328088227340830  
0.1346272497698760 0.3490511776891256 0.3382355436407283  
0.1750833336569731 0.4516237894035891 0.8392350410788267  
0.6317012080282671 0.9636595631221246 0.9790447047561915  
0.6817201756042246 0.8403102408630595 0.4536641144423304

0.5301371556788849 0.4556835605766746 0.4607274592491712  
0.7931188600876127 0.3473641905146217 0.9639704504370836  
0.0239273766613997 0.8556210598084791 0.8415187851048821  
0.2886181492130511 0.9495593143776160 0.3470152286752015  
0.2894793832762282 0.3496492907655590 0.3534713242684771  
0.0210989078138205 0.4514671569633406 0.8538715937987980  
0.7863679989324127 0.9579518994046100 0.9577627467679805  
0.5301127335893900 0.8557219058847587 0.4576804206390659  
0.4718935786478981 0.4324994268239534 0.2418071152030637  
0.8365463833528499 0.3652895799931142 0.7451912186890280  
0.9742384936657369 0.8708791899826379 0.0596606929341214  
0.3363163131260845 0.9338341063998470 0.5716650081087578  
0.3342629418300832 0.3677785965239070 0.5779129776719486  
0.9730580649644439 0.4294051865801735 0.0726129969812330  
0.8339177041835307 0.9426174043500193 0.7361637018800042  
0.4753128174881562 0.8673351226912066 0.2430199971158054  
0.6111492515003455 0.4650327129808314 0.1380868445804626  
0.7044614455171858 0.3275808778491591 0.6378573795879188  
0.1053894433880192 0.8292493211093058 0.1744138067603306  
0.2054271545456111 0.9753357631011974 0.6807941560304558  
0.2022446492487633 0.3267429342717205 0.6871786383623968  
0.1066993948350541 0.4710381780853729 0.1817898996828179  
0.6966536160417592 0.9513679085276185 0.6256702640067602  
0.6066067225929666 0.8374080548690065 0.1224493333145983  
0.8321876643744670 0.2272977004525955 0.1054411514377792  
0.3309070290137767 0.0723914019606856 0.2075153813905142  
0.9802582939265221 0.7301970343606978 0.7145655395420967  
0.9782279781863996 0.5742277119447911 0.7252149257475330  
0.3344489459856359 0.2273640237480161 0.2173699016077654  
0.4774066938865086 0.7310939186013073 0.5860616766462979  
0.8298606270787759 0.0733875452435242 0.1138441144814979  
0.7308471686999257 0.2754517980864015 0.2670622487004302  
0.5789905465978953 0.5347232211160529 0.7664566873390157  
0.2287256433104365 0.0200559238886327 0.0572879339773741  
0.0816213177521496 0.7780591135579952 0.5567653820744022  
0.0789799762189856 0.5254917438757137 0.5621667276980706  
0.2341822814734290 0.2796711534488644 0.0635556662218484  
0.5655004882455499 0.7702749805075845 0.7550010479374479  
0.7265518668743183 0.0272032791726374 0.2593002632935099  
0.6860413063296318 0.2197895529938113 0.4708323974886562  
0.6265058195212835 0.5702812259863508 0.9748945140556503  
0.1801904102575427 0.0691218039178036 0.8568122945922487  
0.1145312973111531 0.7315722592354470 0.3439141210111161  
0.1118147545787143 0.5715946327199021 0.3511588978270612  
0.1832790454181498 0.2303632060853643 0.8632470507841469  
0.6266209891628509 0.7270513214263322 0.9556077456309761  
0.6720758528813870 0.0644745457328317 0.4654896130291145  
0.5301666559359505 0.2374249258561418 0.4508453831565541  
0.7777322136665663 0.5656348805565992 0.9536158817509680  
0.0263393194617861 0.0719721961523568 0.8663583119026083  
0.2717237362235355 0.7301352218503803 0.3602409202325463  
0.2681543961771553 0.5696711830602759 0.3667362885128124  
0.0299579272235877 0.2338761167220861 0.8699970052573475  
0.7786602172466081 0.7280662326991347 0.9442626036457026  
0.5185745764260689 0.0808701044716789 0.4462163014808839  
0.4748623674388517 0.2811060196239099 0.2399107641467260  
0.8314759900853074 0.5233734256402179 0.7430546965478617  
0.9740459660824028 0.0275168399095489 0.0776212911449323  
0.3266551848258850 0.7756883257072497 0.5709940630440541  
0.3267194748964491 0.5254551679063426 0.5760734250570700  
0.9763164711567444 0.2729381583468872 0.0798449133171988  
0.8348287545287388 0.7803822061846400 0.7397025893157191  
0.4742681463567956 0.0266823266295063 0.2373479979068312  
0.6082611789430220 0.2362899080992756 0.1276456861706870  
0.6985407360343584 0.5757435102562989 0.6372863108835284  
0.1090024071938541 0.0721638077246052 0.1888631662221604  
0.2007231283427115 0.7285708872343609 0.6890435716872831  
0.1986689289966884 0.5749240998781494 0.6908844102276562  
0.1115996031966883 0.2276047033452632 0.1912254601704489  
0.6083594070769341 0.0798874720177323 0.1302634667138367  
0.5259429185396295 0.6282306192974955 0.3928554242453181  
0.6971641545232420 0.6658175200339678 0.4285732249589299  
0.6853179784418134 0.6744836490513251 0.2479749266850204  
0.4204075612182308 0.5691052933897756 0.3284526757782749  
0.4041732274167597 0.5876690120423040 0.4427335240609724  
0.8278181761296457 0.6394868358655718 0.4977442040748780  
0.8227050152667255 0.6392033127653501 0.3776255428431741  
0.5350041658970806 0.6043383481556669 0.2196979417795646  
0.4863575533290030 0.6893912805010065 0.1520303052961927  
0.4491597018133558 0.6999886580013061 0.0311987970798967  
0.4067431040113232 0.6534484626845580 0.1277564914352741  
0.4780377045467532 0.6180990406426787 0.0668486861951817  
0.4552571424921733 0.6649359705958716 0.0946124457145489

Structure 17v S=8/2

1.0000000000000000  
20.1473007202000005 0.0000000000000000 0.0000000000000000  
0.0000000000000000 19.7681999206999990 0.0000000000000000  
0.0000000000000000 0.0000000000000000 13.2308998108000004  
Al O Si Fe H C  
2 198 94 2 10 1  
Direct

0.4740516930772503 0.5714022996738950 0.5810009512307657  
0.6950601379101927 0.7364572912182604 0.6308482495871788  
0.9097751514066683 0.4684725130448812 0.1144809408568886  
0.3926735996537837 0.3323307669749579 0.6122819624905820  
0.4034718120396540 0.8237756709606924 0.2018563716616451  
0.8908869280526596 0.9748635258876436 0.6979592129918968  
0.8918538914479102 0.32340347666040348 0.6783199506248395  
0.4081737239093410 0.4773496550602628 0.1963359910150791  
0.3938530329236941 0.9658793158764212 0.6123750604907624  
0.9013030162197883 0.8232382143379764 0.1076799898644615  
0.7949651211730865 0.4523374626658890 0.2072904066124392  
0.5095528449920567 0.3325679338587499 0.6966439933041418  
0.2926813903426737 0.8318254136690149 0.0943869573306392  
0.0032874955796347 0.9682043043414418 0.5928823925505140  
0.0067109546237980 0.3284727746619326 0.5856506537282357  
0.2983229615155712 0.4618348793577567 0.0875784238190337  
0.5036646873815983 0.9768721878708023 0.7202637198719046  
0.7941396168136649 0.8422712266650384 0.2159044412016219  
0.8010506090924615 0.5187514213954206 0.0337932568898789  
0.4928827405358840 0.2786754565650856 0.5134721749191697  
0.2941454453900293 0.7580985035356194 0.2608012913277462  
0.9965658953110945 0.0412383702304892 0.7607488481631624  
0.9951884040287498 0.2559522421961934 0.7547503957210892  
0.2977919839863959 0.5391017354379392 0.2539825430161249  
0.4879284480422422 0.0522318476633780 0.5577252540006221  
0.7922200317474881 0.7525265164025147 0.0642099529731427  
0.8197640626974487 0.3841108842367720 0.0409834702555871  
0.4874810729449006 0.4133362355120646 0.5424171900232494  
0.3011596807325045 0.8926569498360183 0.2721291751976444  
0.9955260318363460 0.9070237968785048 0.7696948205184357  
0.9926619045560713 0.3904640720665256 0.7609205519479991  
0.3051740382045900 0.4058669337314820 0.2688112344206710  
0.5094985150365722 0.9211896050731508 0.5370140164406376  
0.7951037255820111 0.8836244869099932 0.0262172747482438  
0.7097673699117467 0.4700969350993268 0.3507717671713340  
0.6015292599752707 0.3282731179809270 0.8341930773754579  
0.2232727979705021 0.8573375371073635 0.9299425282643827  
0.0703597101355467 0.9364190227933848 0.4285799651904644  
0.0771049681109030 0.3603271494020628 0.4258063962408313  
0.2204225594013437 0.4407723510056575 0.9291693475341147  
0.5656654295425085 0.9506060781487522 0.8925690401569161  
0.7226111815747330 0.8636139689442754 0.3795750502846705  
0.7284794060228975 0.3454213103833517 0.2816162612969681  
0.5887381538322090 0.4407051793738286 0.7252594209745289  
0.21282271366608329 0.9392615334472181 0.0905963911978383  
0.0759648286952277 0.8560134753907815 0.5913875425743037  
0.0816773254772049 0.4401013840220191 0.5887814379157388  
0.2141755421053186 0.3568718853290221 0.0874165853908620  
0.5438826996894387 0.8532774601433027 0.7557681270212426  
0.7156055408349328 0.9516514589802391 0.2264420517720373  
0.6672676328352640 0.4342426903608377 0.1658540778052568  
0.6340306183224764 0.3291771509472734 0.6403754952980995  
0.1609799486080757 0.8184854706104939 0.0982417064406441  
0.1360399141878055 0.9734958031054979 0.5940838877478350  
0.1376373713988472 0.3204687305252709 0.5943318781047916  
0.1699069676846724 0.4815983002655640 0.1063411673030065  
0.6340422449468460 0.9519784923409995 0.7260916412906403  
0.6642414829589915 0.8275117209933485 0.2102391318501824  
0.6745652993445717 0.5300130107594813 0.5191981031716730  
0.6279130001485788 0.2638608801065783 0.9991191843400755  
0.1800247451359921 0.7752744872897674 0.7881898923052886  
0.1098989676728995 0.0200960697216875 0.2865036318416962  
0.1054717800796338 0.2768468296574597 0.2792641587368526  
0.1798126969996106 0.5188149732894622 0.7807725707680719  
0.6157411738068802 0.0261066106832614 0.0384905873297099  
0.6811548939049767 0.7677769130037702 0.5047340915958020  
0.5978952645012102 0.4330218845992100 0.4374435548811940  
0.7137980567186070 0.3554777742815599 0.9301649396140305  
0.0966336293662625 0.8616509349082776 0.8788109315349402  
0.1963251913492473 0.9358689142644353 0.3735880972920397  
0.2013788106568435 0.3524647041732721 0.3619824591741209  
0.0946303335180654 0.4347659824749086 0.8709477490290097  
0.6950197769689008 0.9440128604058956 0.9353831240041460  
0.5940901207696735 0.8554424837217058 0.4205173464425968  
0.7141055674282111 0.4029328844931145 0.5236610842546053  
0.5989581678293167 0.3956978403462359 0.0061645033733406  
0.1881398639604544 0.9067172459097510 0.7509296736236561  
0.1035423020023718 0.8885679110540758 0.2482417905827113  
0.1082779100784038 0.4095494261253324 0.2478217772860522  
0.1896278022855394 0.3858121937319833 0.7527942475678436  
0.6051997945275953 0.8935722241402764 0.0613393258804388  
0.6792706471019684 0.8921521422749441 0.5636188345718433  
0.5137216697147605 0.5352212333472703 0.4729311046632326  
0.8058822427188470 0.2609862016664172 0.9715685983770466  
0.0135219634451587 0.7743092505230146 0.7973488819343626  
0.2832806425826445 0.0240999179443229 0.2994881893175694  
0.2991194570766346 0.2730195772617474 0.2978009776648881  
0.0046424504695588 0.5211620304445462 0.8012059734484244  
0.7841566108796424 0.0177657776516716 0.0314142121019813  
0.5053304062618089 0.7879925194285465 0.5280535109803389  
0.4790382214561204 0.4321294438911941 0.3496443785492017  
0.8329089521254306 0.3629099210362947 0.8467043779354221

0.9721579661433415 0.8528427211608695 0.9462013695939044  
0.3178301787075974 0.9451221582740088 0.4520764407457256  
0.3197303697491712 0.3551008554841976 0.4505167699093358  
0.9711377461712292 0.4340472388715327 0.9440968822190170  
0.8194855186572838 0.9560268621139484 0.8645639998412372  
0.4666975866338121 0.8609579497392944 0.3699888761539706  
0.5351408062758961 0.4337130847574330 0.1707221962745151  
0.7615328531780794 0.3403601833207738 0.6842107749179102  
0.0304605740434292 0.8180382492343690 0.1182735829556114  
0.2653348543664719 0.9774603446593031 0.6288346061966094  
0.2659901276339754 0.3162378323838762 0.6249027648439897  
0.0400106209401584 0.4705023918162245 0.1020416485368733  
0.7633150443963248 0.9492027103142652 0.6866239460379211  
0.5331660527496571 0.8324223505884371 0.2014745332149356  
0.4389601208833591 0.3484290866484388 0.2045194914380514  
0.8425651741227922 0.4473387789716523 0.6921678152686012  
0.9723481316951620 0.9372112935326861 0.1033813982054315  
0.3191990347742184 0.8561416960432719 0.6041942446965424  
0.3127667913462240 0.4402685436005339 0.6069899674623487  
0.9763410633399315 0.3532789596356181 0.1074214768185282  
0.8494167838539810 0.8530913306790692 0.7415375011065126  
0.4617736505850507 0.9443598806004923 0.2135811739687019  
0.5958612211762093 0.5241712203422449 0.0640501792777849  
0.7236813014411717 0.2687990132717433 0.5269387322423399  
0.1041723777494603 0.7530785079030037 0.2458687700401313  
0.1826361094678718 0.0422821441818820 0.7468806177321794  
0.1866150657188598 0.2507075209849196 0.7450274572536991  
0.0945015786541124 0.5441475240589706 0.2404285834306218  
0.6852053018189456 0.0260363320229303 0.5797409006780130  
0.6013122706437354 0.7577527187791865 0.0745283286367835  
0.9003751461813357 0.2428412282878000 0.1129887113921108  
0.3924652807050591 0.5488466824104521 0.5962743784309369  
0.3973499051341609 0.0606122167887054 0.2078623024621935  
0.8978218648239542 0.7303306144329283 0.7201380100954871  
0.8964885461988624 0.5691343677248454 0.7052639461966534  
0.4047026730000209 0.2215853763844454 0.1977845595993777  
0.3925731601989059 0.7441251718536361 0.6117980784074838  
0.8992796806843136 0.0460956096800368 0.1247268671468316  
0.7739824928477487 0.2470612926297387 0.1646473521933081  
0.5202775439159260 0.5543407844064999 0.6872194730031411  
0.2896296192763950 0.0479263574248739 0.1006767332936547  
0.0025721154219493 0.7443979609460112 0.6022512785260691  
0.0058152722329252 0.5494011151390358 0.6032430471710788  
0.2928756792517763 0.2489229482991976 0.1000311158178186  
0.5056438959727020 0.7292900452257522 0.7069224590277973  
0.7856836812108646 0.0654675390980058 0.2179295427645900  
0.8189416590894836 0.1430063010563523 0.0595490415353245  
0.4814988593466401 0.6564728284686293 0.5382765948770374  
0.2988109676164162 0.1479235577177022 0.2347608073029145  
-0.0003338319005967 0.6474703387833844 0.7424434314940440  
0.7227711560801485 0.2180846133739273 0.3417168507666926  
0.5705244088329228 0.5333869732647042 0.8683221764787049  
0.2172141197853490 0.0252629680812530 0.9374414167958772  
0.0736447934864317 0.7707087121165694 0.4383900647686982  
0.0736317630810721 0.5253021646070372 0.4354601146702886  
0.2185545002331140 0.2688901814120033 0.9369809108496401  
0.5658985926335098 0.7530696757857865 0.8822676438030699  
0.7198172027464756 0.0348835737740964 0.3856895471438945  
0.6432583187817599 0.2602711174430657 0.1964488299151508  
0.6522536626827499 0.5550104000065729 0.7173667315221430  
0.1584258756819548 0.0602260064802609 0.1087926695047522  
0.1346092881297473 0.7365836653264549 0.6083379728702308  
0.1371961378120748 0.5616572683025647 0.6017840812576501  
0.1618319542235550 0.2345314559323727 0.1096205254463845  
0.6350926174210089 0.7605440133317830 0.7135339564834473  
0.6531013451772948 0.0687531565681201 0.2213953937806632  
0.6872381544512556 0.1434071660290448 0.4972371741381967  
0.5983548453290272 0.6418425981475597 0.9826345897295032  
0.1898090042181023 0.1472567425640825 0.8689883554467639  
0.0890654333929452 0.6483982260870361 0.3649681189967670  
0.6087875644933932 0.2441822704244375 0.4352448507672858  
0.6925161145480021 0.5522250814493899 0.9345621186811500  
0.0932843707580443 0.0571269532862625 0.8942870686079684  
0.1942427084625643 0.7296344290612099 0.3875359949225330  
0.1921987700616419 0.5649475659329734 0.3692013783777852  
0.094255591620504 0.2403017325223815 0.8869995436680835  
0.6926160655492591 0.7300506598422825 0.9353525827740959  
0.5953448884580508 0.0541885725165131 0.4382552203207650  
0.5082059590620965 0.1559493749869894 0.4383202561692406  
0.7909856879645308 0.6402465011943717 0.9563386116851724  
0.9968424792780537 0.1492866639436473 0.8754743830991757  
0.2971886451565185 0.6465714348388097 0.3693087894386207  
0.5051219321215629 0.2607913655421138 0.3171634262067585  
0.8040074102670636 0.5318734393413722 0.8362352220117074  
0.9724547839830053 0.0299884329488021 0.9584287899389086  
0.3113641219854411 0.7662810262522880 0.4578974620555432  
0.3017552432647465 0.5231217812769202 0.4540333877575265  
0.9742834227142159 0.2701110274471205 0.9516292443097540  
0.8128179041132771 0.7579904607941823 0.8665942942565983  
0.4773231894063755 0.0349347385408024 0.3607676460168673  
0.5215232102517108 0.2582211853634516 0.1203140056145394  
0.7748943760870229 0.5578254470538453 0.6426907166563610

0.0286343826780594 0.0565558717514270 0.1368974791781518  
0.2639385134790491 0.7376193756621963 0.6417869714684497  
0.2658403899562190 0.5622711455834082 0.6392383606781643  
0.0304614543157823 0.2322219755571119 0.1256887219167304  
0.7742239377054787 0.7521514789328803 0.6714790822226070  
0.5253088182262969 0.0594287414127023 0.1769032349028713  
0.6001839209783003 0.1522832027222538 0.0909804457800210  
0.6900104201416905 0.6512181610638759 0.5885485381336909  
0.1020224082518227 0.1475564219192900 0.2322695226852906  
0.1876765116088971 0.6478443604261342 0.7343640831029001  
0.6008365431471758 0.6467052093429554 0.4144426586778225  
0.4995518657973773 0.7007506634309879 0.3271669944686619  
0.7132841763894435 0.7127824225885930 0.2956198059235392  
0.4221456744760901 0.5938919552044806 0.3548562739776546  
0.7890836211950804 0.6542258139862440 0.4388676270036576  
0.5377525337817183 0.5762091720189662 0.2703268970073465  
0.8309438845139606 0.4561142486293376 0.0976194089591446  
0.4709306012787273 0.3390282739468382 0.5891753357351758  
0.3231565586626245 0.8265123908445395 0.2081692087808948  
0.9712169554806016 0.9724857854445583 0.7057458859859268  
0.9716730882831961 0.3241970739897634 0.6960360874390188  
0.3271545735288123 0.4705520334196072 0.2020304933918862  
0.4729592664389733 0.9781028368592648 0.6065326794584107  
0.8212112121193156 0.8254068746370099 0.1021723014151571  
0.7244044380745954 0.4248964316244120 0.2509062944261019  
0.5834012650604493 0.3592677124233333 0.7250749952133869  
0.2225486961132413 0.8616291623860532 0.0522070110267940  
0.0714802473365052 0.9337431317083373 0.5510593409182394  
0.0759185634202261 0.3624997452705742 0.5477807655841371  
0.2255213430230978 0.4349399082550852 0.0508663772896951  
0.5620583240090079 0.9321637787250903 0.772871276445812  
0.7247062387226870 0.8731511188772940 0.2581337913312793  
0.6731219614744778 0.4586599521588067 0.4588277007784003  
0.6358592049457922 0.3362220055476591 0.9429985571580064  
0.1718670324079625 0.8502457830073125 0.8358522153536294  
0.1203982430478672 0.9451107009268194 0.3331454336532116  
0.1240106908564328 0.3497245329619399 0.3276068368968140  
0.1710213569938817 0.4450709569767630 0.8321885745119478  
0.6206378573731046 0.9538583444596744 0.9817838293541525  
0.6682880322552548 0.8450499029398599 0.4664304593331299  
0.5201704951239901 0.4551781455327131 0.4488220321534422  
0.7920961732712746 0.3403811627866693 0.9460357399595241  
0.0194570977036578 0.8490022462424813 0.8473375815545948  
0.2743801980566045 0.9496377426621998 0.3495494233484412  
0.2810355490903230 0.3466076909769920 0.3445795263888730  
0.0164499152984157 0.4450936532337422 0.8440975207318755  
0.7732767911427629 0.9505123534565506 0.9641078385435615  
0.5180499931662668 0.8557471412271358 0.4640788101193413  
0.4664607922416230 0.4239785821592120 0.2301027411975879  
0.8318648485385904 0.3687147989769219 0.7245513772218788  
0.9692485914776366 0.8586049462326585 0.0683390437604496  
0.3239756491381023 0.9354999176358895 0.5735923569094410  
0.3226713096278560 0.3623650894417512 0.5727450925925406  
0.9743607210284566 0.4308285293121740 0.0667027346914070  
0.8301325875421059 0.9323869588266487 0.7479618618689992  
0.4663197665303170 0.8652926499489852 0.2472958362868852  
0.5995591758333985 0.4464619894259485 0.1024769988052911  
0.7079197157737370 0.3356183029689401 0.5934263706544415  
0.1001473163812702 0.8211607179105674 0.1783926913101259  
0.1929481264867246 0.9739480624570444 0.6810290574048097  
0.1949314843111219 0.3197951594052820 0.6803614389886958  
0.1036219051979771 0.4752896913644045 0.1753476573928293  
0.6901500573087586 0.9550271798673264 0.6395915873338800  
0.5994301478232349 0.8289194062674431 0.1346412556893148  
0.8253077234000424 0.2236618610199374 0.0776271397777743  
0.3177630568193245 0.0696788440412828 0.2115025448900094  
0.9775962236384070 0.7246650714928725 0.7162287422989505  
0.9767904038401058 0.5710928514556358 0.7135568019212496  
0.3241664322178941 0.2237349875248423 0.2074806062712441  
0.4712719901092235 0.7286826091269548 0.5950299819942469  
0.8226906131603827 0.0679782866708752 0.1081771996251607  
0.7172628600803804 0.2677881741872947 0.2443859809018518  
0.5799740749797241 0.5212882980818292 0.7470981818031998  
0.2195735069108438 0.0183123033715783 0.0596092220177136  
0.0717972495413382 0.7767335580155574 0.5608430006562909  
0.0747393147268897 0.5192351563380582 0.5578449061554613  
0.2220690120287070 0.2772440185294321 0.0589391156388909  
0.5637663486197148 0.7733481506839961 0.7623646866673719  
0.7188712906874382 0.0306771909143360 0.2631052376797290  
0.6847967893476757 0.2187316145424454 0.4503485170153149  
0.6144541771636518 0.5631459260491655 0.9600345774176335  
0.1702386901850080 0.0683305610383399 0.8610415551630186  
0.1159831927253989 0.7253362062433947 0.3589175111899446  
0.1129230801196724 0.5707383212913782 0.3524763550690942  
0.1717983789486415 0.2265279189798045 0.8592883357979245  
0.6147667569228450 0.7211642282139583 0.9663505980983335  
0.6716825078034820 0.0646600138435999 0.4745820520402660  
0.5289697258360750 0.2347776924862187 0.4269725462696670  
0.7720345870739921 0.5612045109273727 0.9393334367549870  
0.0149930761625270 0.0696310625162595 0.8721581087837760  
0.2734653987399289 0.7255874958555513 0.3689366169086742  
0.2720808614660865 0.5676124275839919 0.3628385792359256

0.0156250933815026 0.2286188942241338 0.8662507557991428  
0.7717521239440852 0.7201035195791421 0.9545134174166086  
0.5175218620862608 0.0750834325781927 0.4487473460832882  
0.4679669986202710 0.2717311756428751 0.2101921413503413  
0.8290100900496574 0.5260318360098885 0.7202603320556034  
0.9687710629001213 0.0176744651735828 0.0802363392119927  
0.3219925004380468 0.7757831418696330 0.5794129845186736  
0.3207301965903429 0.5196236266879058 0.5747949109435850  
0.9704037763826228 0.2744565970014481 0.0746305217173765  
0.8313744422872675 0.7730525930993537 0.7485502951013284  
0.4658643804524544 0.0243661198863974 0.2402247056529473  
0.5977328536192179 0.2334326641446117 0.1029918766526578  
0.6966261990453697 0.5719610310560269 0.6193356768768378  
0.0995450044460868 0.0702465914630281 0.1911251723928621  
0.1919751233696994 0.7250283741264362 0.6932086323988215  
0.1934632213466277 0.5715228644444218 0.6892165858212113  
0.0999388594954827 0.2238026542277763 0.1866823274698563  
0.5981329599336819 0.0755962280921020 0.1319550088782900  
0.5174072673150119 0.6284364779339986 0.3806507551006688  
0.6820110957329757 0.6747532968900802 0.4352783867016902  
0.6862665183862567 0.7488096749748357 0.2633754920395181  
0.4285377734210706 0.5701432694245439 0.2902659974665758  
0.3897869777935490 0.6302754987884633 0.3435098327871896  
0.8095390928930829 0.6473216393146508 0.5050666650042798  
0.8151401820408888 0.6881720235455604 0.4030937715889839  
0.5444807088754344 0.6050986757448903 0.2113139568488474  
0.7142658982346279 0.6744073815912129 0.2456629423618641  
0.7040546999838947 0.6164565713453745 0.1163103561450479  
0.6619050537252587 0.579106723252655 0.2301414469538329  
0.7552907484306343 0.5756939690983213 0.2174587740693375  
0.7072937640204521 0.5933569514693723 0.1907006429351938

Structure CH4/16vv→17v S=8/2

1.0000000000000000  
20.1473007202000005 0.0000000000000000 0.0000000000000000  
0.0000000000000000 19.7681999206999990 0.0000000000000000  
0.0000000000000000 0.0000000000000000 13.2308998108000004

Al O Si Fe H C

2 198 94 2 10 1

Selective Dynamics

Direct

0.4740716470266815 0.5712701624509944 0.5809082051214294 F F F  
0.6949699092995354 0.7363922690138005 0.6317184632121366 F F F  
0.9098182753978724 0.4685560795800359 0.1142288223494235 F F F  
0.3925632507581596 0.3325120515103683 0.6122467382878538 F F F  
0.4038062786433892 0.8236953352060776 0.2020775819081421 F F F  
0.8910997203899760 0.9745987481672540 0.6978258206085215 F F F  
0.8916641509391557 0.3238938344845818 0.6778636075489944 F F F  
0.4082498843131628 0.4775788507920955 0.1966027287899218 F F F  
0.3940457706462512 0.9654338427590560 0.6127597107448114 F F F  
0.9013890461879358 0.8228490343936474 0.1071716438148384 F F F  
0.7951116785522795 0.4527719416068581 0.2073797160168275 F F F  
0.5093664640748765 0.3326255056126892 0.6967097446376530 F F F  
0.2930195991565117 0.8322391979606244 0.0944274839282609 F F F  
0.0035862468374634 0.9682391174644736 0.5927333915466588 F F F  
0.0066796930457250 0.3283659456869995 0.5855399374310893 F F F  
0.2983339691030316 0.4618504785102430 0.0875885485065339 F F F  
0.5038332465492157 0.9771052896053118 0.7203813407044251 F F F  
0.7943824095752644 0.8414001975297872 0.2162849008071910 F F F  
0.8011656113235550 0.5192475883699154 0.0337006679020498 F F F  
0.4928182401151577 0.2788796383568209 0.5132765666211260 F F F  
0.2943516746826108 0.7582520886720954 0.2605525211841194 F F F  
0.9966549759533204 0.0409037786613611 0.7609875280764705 F F F  
0.9945288861941103 0.2558986205549596 0.7547170059599496 F F F  
0.297953341778317 0.5391646779382497 0.2539327068146944 F F F  
0.4877649823609025 0.0520819525899048 0.5573385060726940 F F F  
0.7919700566884137 0.7525683328751310 0.0640261093039097 F F F  
0.8193414902609087 0.3846223639140189 0.0409123519750913 F F F  
0.4874891780574753 0.4134993070920024 0.5425209089993599 F F F  
0.3018417919843250 0.8928118238461721 0.2723771116655950 F F F  
0.9957951870072052 0.9065938458538804 0.7689486696093594 F F F  
0.9927758376369799 0.3904409355625826 0.7607124210681870 F F F  
0.3053512473506386 0.4058957893814942 0.2687747014934657 F F F  
0.5097638679952717 0.9209925478747413 0.5375901300276171 F F F  
0.7951185399324816 0.8838864232527956 0.0271065060142089 F F F  
0.7100954486415817 0.4703435188372112 0.3512970101018393 F F F  
0.6010221266222534 0.3286465264646184 0.8347017180861843 F F F  
0.2233319477742523 0.8572051585251577 0.9301442709005890 F F F  
0.0707228431001937 0.9363199478941161 0.4285202133121816 F F F  
0.0772258931018469 0.3603635019400140 0.4258692893611700 F F F  
0.2203614981933260 0.4407687552593814 0.9292349879596694 F F F  
0.5658604765184393 0.9503289423873710 0.8925674914835431 F F F  
0.7233166010671893 0.8631018142852490 0.3800987462403041 F F F  
0.7284219637201197 0.3459454243107625 0.2815460123917244 F F F  
0.5885048670068035 0.4408395222392976 0.7250061075934392 F F F  
0.2125621895704584 0.9392554955368915 0.0905759177417652 F F F  
0.0762635599111952 0.8559715867167766 0.5912975420480731 F F F  
0.0816180330790173 0.4400731259400043 0.5888154693054061 F F F  
0.2142013288353495 0.3568770747822316 0.0875475304946498 F F F  
0.5430674930514839 0.8532713465187884 0.7555078805233625 F F F  
0.716077509102828 0.9508574312223435 0.2272551141693216 F F F  
0.6673015744227886 0.4351999484759338 0.1662811013533846 F F F

0.6338162650633533 0.3291150935778763 0.6408380777752550 F F F  
0.1614944328357278 0.8181433465778348 0.0989356966545572 F F F  
0.1363422220729941 0.9734249752991098 0.5939917387188300 F F F  
0.1375576074770799 0.3203928320809555 0.5944584196604192 F F F  
0.1699789143894065 0.4815988531675350 0.1065996590951979 F F F  
0.6339817872960476 0.9513961174661960 0.7259493656911583 F F F  
0.6642156031986914 0.8269285094213138 0.2106653424613940 F F F  
0.6741870830505944 0.5300789303715173 0.5192455802257998 F F F  
0.6280827910122331 0.2640242589385137 0.9992462617860836 F F F  
0.1802605042890662 0.7754167166726726 0.7879581047548506 F F F  
0.1103273966643549 0.0200501959794753 0.2865291858716029 F F F  
0.1053729851214288 0.2767624940719853 0.2794360629054322 F F F  
0.1798393525530385 0.5187800090094551 0.7807815949383839 F F F  
0.6158702625970345 0.0262057115397367 0.038027577755111 F F F  
0.6811196113515146 0.7679163121469367 0.5059373248777942 F F F  
0.5978933119185640 0.4330000240352977 0.4370549362809510 F F F  
0.7138062308185519 0.3555587681533281 0.9293610487355709 F F F  
0.0967567435352215 0.8616063306984959 0.8789968318404415 F F F  
0.1966360207375522 0.9355982450330325 0.3731872830414295 F F F  
0.2013667141155223 0.3525766375104556 0.3614599165173976 F F F  
0.0946292762710133 0.4347813089349654 0.8709545369583975 F F F  
0.6953907910859443 0.9442864029788116 0.9350337156722086 F F F  
0.5947216303168861 0.8559071557118134 0.4209227284302618 F F F  
0.7138469566034913 0.4030500245501230 0.5242615870949459 F F F  
0.5993112598994668 0.3959222617091359 0.0067462866713973 F F F  
0.1882137711234740 0.9068751885256852 0.7512896926851587 F F F  
0.1035738830541968 0.8885384542406133 0.2481116679813645 F F F  
0.1080069080047720 0.4094409430913656 0.2476197572953433 F F F  
0.1896334077320155 0.3857907592681112 0.7528549812895060 F F F  
0.6059461783136538 0.8936043886115999 0.061328890805639 F F F  
0.6804154621246534 0.8918171552452188 0.5643045672941961 F F F  
0.5138278161290365 0.5352765928263685 0.4727051482188147 F F F  
0.8059387570961104 0.2612859715025500 0.9717401137478907 F F F  
0.0138085608252333 0.7740684948634291 0.7980034441127677 F F F  
0.2836627068444805 0.0241699609118133 0.2997562741155397 F F F  
0.2992102879052205 0.2730510197739364 0.2975765398406634 F F F  
0.0046800310744059 0.5211347366316620 0.8011220102038417 F F F  
0.7845808438132704 0.0179897824989884 0.0310968371680990 F F F  
0.5057570205674506 0.7876657259885121 0.5268888902870389 F F F  
0.4788627664669196 0.4321401134807364 0.3496817192214454 F F F  
0.8331319125485058 0.3630793894044337 0.8467172725242258 F F F  
0.9720057012689759 0.8534465104278629 0.9457971807522166 F F F  
0.3179258313674053 0.9451588890766445 0.4524611140197450 F F F  
0.3196017960245744 0.3550761774103594 0.4504241585990852 F F F  
0.9710393151388252 0.4339165522240994 0.9438552392343492 F F F  
0.8200875702454797 0.9555572036266756 0.8648548508226719 F F F  
0.4673617427240959 0.8614827893991099 0.3697168059252208 F F F  
0.5351914550799993 0.4340337678972250 0.1709982009995950 F F F  
0.7613517961837388 0.3401534098495659 0.6845478135612462 F F F  
0.0308004632022568 0.8185033504155262 0.1170879946358394 F F F  
0.2655703714120465 0.9774561806433878 0.6293602748363022 F F F  
0.2659143136062583 0.3162470321325153 0.6248879579634173 F F F  
0.0400885325954574 0.4705577381634067 0.1014946520169235 F F F  
0.7633410916905382 0.9506353441506090 0.6872410765851515 F F F  
0.5333529260332891 0.8325834066921346 0.2009807425007402 F F F  
0.4389962000702378 0.3484623083658782 0.2040730606870023 F F F  
0.8417477182130356 0.4475800512126423 0.6919240782080872 F F F  
0.9717350297716979 0.9372453153931959 0.1036004244529295 F F F  
0.3191306963220367 0.8559219198501975 0.6041704494793161 F F F  
0.3125520725548390 0.4403648649555160 0.6066668209149088 F F F  
0.9764429060347957 0.3533348656165935 0.1072890618664274 F F F  
0.8484655724940275 0.8530830868168057 0.7400428916346986 F F F  
0.4618518845299590 0.9445292836558900 0.2129874387887923 F F F  
0.5953421114456328 0.5245403334082791 0.0639249975794116 F F F  
0.7233695010141915 0.2689099806798888 0.5270828450052244 F F F  
0.1033298944981642 0.7530793914851053 0.2457234178435878 F F F  
0.1825289503959933 0.0423854019258740 0.7469129014042940 F F F  
0.1866651501160017 0.2506410860184952 0.7450320126544722 F F F  
0.0941895338867730 0.5440446756719333 0.2403941299278260 F F F  
0.6844359977429895 0.0258552530399098 0.5793725386158263 F F F  
0.6011512383846175 0.7578998737846658 0.0740664621253614 F F F  
0.9002758871722712 0.2430310352211444 0.1132191486210295 F F F  
0.3925152774611192 0.5487739597767489 0.5962051096772062 F F F  
0.3975116424279838 0.0607140510479795 0.2073573588928352 F F F  
0.8980058221369361 0.7305798757044530 0.7208713999534118 F F F  
0.8964208681955939 0.5690116589629695 0.7053106888030630 F F F  
0.4047071602519241 0.2216608790246366 0.1972948221755410 F F F  
0.3928220900885003 0.7440467681922746 0.6108543534614732 F F F  
0.8994316488709561 0.0466891081192716 0.1250648140429891 F F F  
0.7738992623601075 0.2475374106116582 0.1647625091082753 F F F  
0.5204649894470826 0.5547500873767817 0.6869702935203031 F F F  
0.2896565804459772 0.0477578462236054 0.1007761651252388 F F F  
0.0026972374571239 0.7445096876665759 0.6027614613131231 F F F  
0.0058442965239327 0.5494592751147017 0.6032617333127596 F F F  
0.2927690576930693 0.2488044650870029 0.0998226905772643 F F F  
0.5058221118486473 0.7290185376307184 0.7060377818644976 F F F  
0.7856970581106377 0.0650898835982386 0.2179788007587337 F F F  
0.8186940863273167 0.1432911624375670 0.0600842915460749 F F F  
0.4817057579217321 0.6563290969178585 0.5370528326310591 F F F  
0.2989134992109839 0.1479000114723307 0.2346718686746949 F F F  
0.9996034725634875 0.6474016107970677 0.7425766472722217 F F F  
0.7227662554200781 0.2184952788111011 0.3418225156647361 F F F

0.5705297186790076 0.5335126764231815 0.8681329412886944 F F F  
0.2173290800382622 0.0253274750000207 0.9374182271100422 F F F  
0.0735148961741626 0.7705257333253963 0.4385213560529940 F F F  
0.0737025818320014 0.5252304438773455 0.4355002491961475 F F F  
0.2182800433794463 0.2689612792872172 0.9370127192268589 F F F  
0.5655980830211119 0.7531405673394860 0.8819919963877130 F F F  
0.7198356752376660 0.0348658769119167 0.3858060820509680 F F F  
0.6431927939117491 0.2607098194439641 0.1966062359992563 F F F  
0.6523764186382888 0.5549950583840406 0.7173440406615942 F F F  
0.1588081969381410 0.0604182048423484 0.1087515805115901 F F F  
0.1348315317769621 0.7365291602355204 0.6081504315612356 F F F  
0.1372478879036392 0.5616233768114909 0.6017846509756675 F F F  
0.1617048480591068 0.2345496013554469 0.1097668818831040 F F F  
0.6349652236972594 0.7611541237151251 0.7136961723715417 F F F  
0.653177342771401 0.0678322389133724 0.2212938268949995 F F F  
0.6872549231230938 0.1434143862521898 0.4971438752516776 F F F  
0.5978523116848975 0.6420643880370418 0.9820332304260661 F F F  
0.1894443536180230 0.1472977972163720 0.8692686593484258 F F F  
0.0889250328437005 0.6483307556394919 0.3649063085982116 F F F  
0.6085741862839690 0.2440309281915383 0.4351046428923462 F F F  
0.6923965304026281 0.5524759501943300 0.9347904221917182 F F F  
0.0932585748241943 0.0568336754358459 0.8946403889807416 F F F  
0.1940592047711244 0.7297514671044547 0.3864937916502969 F F F  
0.1920978962145876 0.5649956283217326 0.3686365247624004 F F F  
0.0940054805133893 0.2406049754623144 0.8866042751993737 F F F  
0.6924180252673677 0.7302536261199158 0.9347298076160883 F F F  
0.5951293207500441 0.0545864804040600 0.4377429060804092 F F F  
0.5077168028735747 0.1560547557749705 0.4383200041091861 F F F  
0.7909479770052580 0.6405727811198009 0.9552210089186439 F F F  
0.9970158790182970 0.1491799205763770 0.8751616927317778 F F F  
0.2971054383318307 0.6466658483006194 0.3688495632447160 F F F  
0.5049734785297239 0.2608734651693220 0.3169615235432871 F F F  
0.8036797919055287 0.5319857180919841 0.8361206606225710 F F F  
0.9723877272734990 0.0301000858052664 0.9587209961289173 F F F  
0.3111272411623230 0.7661663841171010 0.4577357898393188 F F F  
0.3016403921567902 0.5234570220385305 0.4540136488933893 F F F  
0.9741104228997971 0.2699324244211818 0.951720865501700 F F F  
0.8126604757377797 0.7587371531704759 0.8669993491245153 F F F  
0.4772368512681970 0.0349465545821565 0.3604393957614030 F F F  
0.5216234999098742 0.2581203845249196 0.1200767959168958 F F F  
0.7748362148415399 0.5586323659742022 0.6425054601118028 F F F  
0.0287847333994567 0.0562508984373749 0.1371362953987467 F F F  
0.2641922464078609 0.7372861688291343 0.6418354463891235 F F F  
0.2658796237359438 0.5623966436909623 0.6393543758432008 F F F  
0.0303732809065011 0.2322040333181598 0.1257950512771901 F F F  
0.7743641643403326 0.7505769718230170 0.6721471320194340 F F F  
0.5254439600854350 0.0595135211324114 0.1765394245595480 F F F  
0.6007625938782905 0.1523487401948518 0.0915485162513857 F F F  
0.6890269962579375 0.6513868945183224 0.5881408909450048 F F F  
0.1019637977373846 0.1475086063554452 0.2323900203723466 F F F  
0.1876245549926946 0.6478427939070085 0.7344791281129942 F F F  
0.6010396684694385 0.6476172256473807 0.4142799686242782 T T T  
0.4993551526954969 0.7011188552082417 0.3277574876570091 T T T  
0.7115268401116691 0.7086615200642531 0.2986441518417813 T T T  
0.4218600329064091 0.5939664033132910 0.3552360183298436 F F F  
0.7888716488964124 0.6533928187391610 0.4399098737522423 T T T  
0.5384588553151800 0.5771793052997679 0.2715145394644264 T T T  
0.8308820554950394 0.4566033558643374 0.0975970891588611 F F F  
0.4708454788450325 0.3391137122338061 0.5891830068753285 F F F  
0.3235068517992682 0.8266946856771566 0.2081657983875508 F F F  
0.9714027439043333 0.9722644093965298 0.7055572551908686 F F F  
0.9714529549870613 0.3242641964707329 0.6958402183621901 F F F  
0.3271906440075750 0.4705717203576284 0.2019826050890423 F F F  
0.4730810347895302 0.9780760494378199 0.6067119673720893 F F F  
0.8212191884570913 0.8251585354621674 0.1022803188661953 F F F  
0.7245348273635931 0.4255153319133745 0.2510354005592009 F F F  
0.5831747363548184 0.3593898536502012 0.7253440252927570 F F F  
0.2226833464406320 0.8616137832162020 0.0524013370070115 F F F  
0.0717523235129031 0.9336905699380574 0.5509782470886460 F F F  
0.0758847488036047 0.3624652240058005 0.5478267898188826 F F F  
0.2255056333843611 0.4349385171869111 0.0509211672550888 F F F  
0.5619770043667885 0.9319953178537321 0.7728676099844044 F F F  
0.7248763640008180 0.8721002083911957 0.2585009275662881 F F F  
0.6731121274023101 0.4586937703808077 0.4588960482219751 F F F  
0.6358940536658724 0.3364353134548089 0.9431851733529310 F F F  
0.1719738578950803 0.8502614212771028 0.8359873294282459 F F F  
0.1206670935167465 0.9450041013849657 0.3330072444507728 F F F  
0.1239155332718447 0.3497104456806392 0.3274843657344081 F F F  
0.1709969813655906 0.4450552402763242 0.8322080936007240 F F F  
0.6209956756613687 0.9538649453521341 0.9815756153400204 F F F  
0.6689043873185492 0.8450954250829655 0.4668436246734242 F F F  
0.5201960904306061 0.4551239517673428 0.4487209654629539 F F F  
0.7921028649437827 0.3406487588862449 0.9459638473716069 F F F  
0.0195991477595522 0.8489684536555975 0.8473478189631366 F F F  
0.2747115018566001 0.9496696676908909 0.3496872693984867 F F F  
0.2810284086108272 0.3466010855089126 0.3443702812568828 F F F  
0.0164462546969432 0.4450670302731433 0.8439973542043224 F F F  
0.7736202119646013 0.9505484660697183 0.9642287406612364 F F F  
0.5185620338194268 0.8559509453159344 0.4639564518710790 F F F  
0.4664518108770745 0.4239453712178108 0.2300431315070890 F F F  
0.8316182860115932 0.3689347768472613 0.7245474979950651 F F F  
0.9690814545714539 0.8587363042290029 0.0679831961564216 F F F



0.3240603071855286 0.9353601383431295 0.5739330352038975 F F F  
 0.3225256904414801 0.3624023550373102 0.5726397734706542 F F F  
 0.9743486645504952 0.4308638280002764 0.0664632465320861 F F F  
 0.8301039997143933 0.9325249587505484 0.7478725172129963 F F F  
 0.4666376157298283 0.8655512424353039 0.2469363618490986 F F F  
 0.5996548032154971 0.4469801385103120 0.1027469691726843 F F F  
 0.7076826169894778 0.3356202450754330 0.5938144482470459 F F F  
 0.1001240536122628 0.8211806148074196 0.1781607073783892 F F F  
 0.1930535267742658 0.9740048887418428 0.6812071727127452 F F F  
 0.1948769170012916 0.3197624855874393 0.6804265780092773 F F F  
 0.1034961278409995 0.4752450790731790 0.1752214386441295 F F F  
 0.6902245829046924 0.9551390026516174 0.6397370547066196 F F F  
 0.5998524803158651 0.8289064430057601 0.1345745607528984 F F F  
 0.8251913147454321 0.2239436323994116 0.0778562102882823 F F F  
 0.3179327955786641 0.0696600710955407 0.2114456211688647 F F F  
 0.9777204662867239 0.7246800637670074 0.7167082777033967 F F F  
 0.9767018818986370 0.5710685362804196 0.7135673809397348 F F F  
 0.3241835590587319 0.2237065551137766 0.2072449368436342 F F F  
 0.4714955531889625 0.7286718310667355 0.5941608992734334 F F F  
 0.8227347347912349 0.0681684854841755 0.1083232870029680 F F F  
 0.7172118090705085 0.2682813883378314 0.2445372682162313 F F F  
 0.5800227297560530 0.5214351097810446 0.7469819661941939 F F F  
 0.2195545499071557 0.0183227062099097 0.0596206739586709 F F F  
 0.0718845956088202 0.7766782061927267 0.5609597615868418 F F F  
 0.0747380609467611 0.5192182201101779 0.5578972720763516 F F F  
 0.2219259037600756 0.2772195110071776 0.0589801944504937 F F F  
 0.5634756203221006 0.7734625379752165 0.7621916759109897 F F F  
 0.7190508935511790 0.0299878841005518 0.2632231407666834 F F F  
 0.6846614573643443 0.2187894050450343 0.4503785608461088 F F F  
 0.6143219419806897 0.5634174335908070 0.9599846100832641 F F F  
 0.1701324025028643 0.0683061629189500 0.8611852508802960 F F F  
 0.1156589807742175 0.7253269415980637 0.3586281359251192 F F F  
 0.1127546232553734 0.5706951979089152 0.3523300355562365 F F F  
 0.1715596016845957 0.2265787512043766 0.8592818729866568 F F F  
 0.6146394452699447 0.7212939823492250 0.9660016134852394 F F F  
 0.6714589334934237 0.0647186843822933 0.4742816946606890 F F F  
 0.5287505710534272 0.2348032797540937 0.4267846730647826 F F F  
 0.7719162030173109 0.5615253307132386 0.9392871066415409 F F F  
 0.0149969236806021 0.0694816204189630 0.8723102767585135 F F F  
 0.2733108893887304 0.7257035313429385 0.3684572477687759 F F F  
 0.2719260716568040 0.5676987894468278 0.3625947181659152 F F F  
 0.0153698021740660 0.2286110401313370 0.8660894162686250 F F F  
 0.7715072587674868 0.7203178385186563 0.9544339230316652 F F F  
 0.5172878394985699 0.0751956080827821 0.4484441584082001 F F F  
 0.4680135290161779 0.2717216113363051 0.2098044276561299 F F F  
 0.8286745535138849 0.5263236410405115 0.7202049590695313 F F F  
 0.9686727984590553 0.0177380203447796 0.0805181635415083 F F F  
 0.3219996818590737 0.7756149049481202 0.5791824554574593 F F F  
 0.3206524216017485 0.5197303676970384 0.5747432019193963 F F F  
 0.9703241445773381 0.2744752693840611 0.0747232473373959 F F F  
 0.8312549101057406 0.7729416644890905 0.7487968837405884 F F F  
 0.466003056350277 0.0244944942969670 0.2398360389852100 F F F  
 0.5979385781816419 0.2335182498519165 0.1030929840368957 F F F  
 0.6964750728004816 0.5721577203469476 0.6190805249741609 F F F  
 0.0996600042526896 0.0701981274527984 0.1912325286498983 F F F  
 0.1921058465700419 0.7249935536025340 0.693175655148623 F F F  
 0.1934432180717914 0.5715351648276691 0.6893002086230093 F F F  
 0.0998154503872681 0.2237451008206515 0.1868265915626787 F F F  
 0.5983920921102188 0.0754802633590227 0.1318115283589449 F F F  
 0.5176605203831530 0.6288902608362055 0.3812772600062196 T T T  
 0.6823744981321856 0.6756760321981343 0.4357061665965752 T T T  
 0.6840559515185040 0.7427848373369123 0.2634162041841293 T T T  
 0.4267866317150388 0.5694585807207641 0.2910755312992374 F F F  
 0.3889719413446738 0.6299943646404101 0.3447137146351251 F F F  
 0.8100953997398977 0.6478617701219862 0.5057909035404915 T T T  
 0.8152289701363927 0.6853301457346089 0.4006638624790572 T T T  
 0.5448515358851183 0.6058541163901727 0.2121261734748709 T T T  
 0.7129745921203032 0.6654170380766593 0.2467097374314932 T T T  
 0.7045056105953612 0.6145240130348089 0.1137602347668758 T T T  
 0.6628529101251645 0.5827398116523065 0.2300426331779467 T T T  
 0.7551243631406982 0.5768757390029395 0.2163878039762535 T T T  
 0.7083127923732584 0.5993098781750307 0.1924443119794472 T T T

Structure 18v S=10/2  
 1.0000000000000000  
 20.1473007202000005 0.0000000000000000 0.0000000000000000  
 0.0000000000000000 19.7681999206999990 0.0000000000000000  
 0.0000000000000000 0.0000000000000000 13.2308998108000004  
 Al O Si Fe H C  
 2 198 94 2 10 1  
 Direct  
 0.4748867730735387 0.5704110570372749 0.5814364981054376  
 0.6911750047741950 0.7329687003725120 0.6289703785528563  
 0.9086237973133419 0.4687024281309670 0.1172650673428779  
 0.3920906666976997 0.3321465391304522 0.6109992068597397  
 0.4058476648962108 0.8228102198206151 0.2037620208009172  
 0.8906241972574254 0.9742308230277508 0.6921420460957568  
 0.8900309503906025 0.3240092074690287 0.6793685843991221  
 0.4056786786365625 0.4785585936063623 0.1979290079539366  
 0.3969777923702041 0.9671620974916938 0.6126569905046650  
 0.9034082769377247 0.8188050894788579 0.1014082365034266  
 0.7927056693645046 0.4570305407137137 0.2093707931977362

0.5069905725852744 0.3382445907352927 0.7015010040283308  
0.2952716810147439 0.8337331176403812 0.0932883870879075  
0.0050725408928176 0.9702301819656624 0.5901820675320200  
0.0049291170981103 0.3299877434613385 0.5864963705729999  
0.2963990678182388 0.4637761090749057 0.0882150154345860  
0.5074676650581944 0.9779750689474838 0.7198053917111533  
0.7976546812974884 0.8403807882261201 0.2123214614379427  
0.8034654501636930 0.5262066753770223 0.0376246685918350  
0.4966552205724450 0.2809652610852145 0.5192526978724400  
0.2961093158063287 0.7578156869570787 0.2580086825950851  
0.9945750114523463 0.0408724889402333 0.7600068863448622  
0.9944405199785725 0.2575410257270598 0.7554558065009456  
0.2951466284214866 0.5398504754715077 0.2556766201840314  
0.4915249783961581 0.0523420123934292 0.5560465147904219  
0.7913000879633494 0.7524332178660912 0.0592253880223206  
0.8146462186357034 0.3903610076808834 0.0408581517966834  
0.4861302346471249 0.4155110457823104 0.5437728692123420  
0.3034303069730064 0.8924136343868416 0.2719817343912693  
0.9953150351153276 0.9060212682165186 0.7620701805399742  
0.9903242258136152 0.3922958801821202 0.7610583369723339  
0.3023930744997517 0.4061250466689650 0.2682054562926811  
0.5122841677222598 0.9209353214825500 0.5382684331037183  
0.7989438959558925 0.8837480049653470 0.0227745601405290  
0.7090104674126971 0.4739193848177108 0.3565964834863986  
0.5973276570849210 0.3283978711089698 0.8400094863697775  
0.2217902919489573 0.8544718566488044 0.9314105416028458  
0.0734251817541024 0.9376777862856182 0.4284380777269058  
0.0762359460691308 0.3609704556433404 0.4274571417374109  
0.2179887307799797 0.4430294574591782 0.9303191985477292  
0.5678020465844946 0.9470250522666689 0.8919116330147296  
0.7268285723092140 0.8630393120814492 0.3781742690954950  
0.7260411172477571 0.3499702633069199 0.2856071870417523  
0.5907565974028669 0.4428001126336942 0.7347211784520022  
0.2114585609089447 0.9388217035041793 0.0885163793428453  
0.0769412378523964 0.8565818019785942 0.5902617381612777  
0.0797414668473502 0.4417425144717503 0.5895133220875808  
0.2135804163299692 0.3578468169459906 0.0872410817673331  
0.5374172863932039 0.8514453392519535 0.7567586805528095  
0.7186118755642181 0.9472177394453529 0.2228131007664576  
0.6645669598190408 0.4400831329020108 0.1722786679630628  
0.6313609151918871 0.3312925593816940 0.6456311171158950  
0.1645168912442278 0.8160145507319791 0.1050670246078017  
0.1380843112296992 0.9733416478008700 0.5951974880848017  
0.1358409404999849 0.3220002947279311 0.5970267590125752  
0.1681939583722044 0.4821601291973908 0.1086990512795738  
0.6354252705228579 0.9409737173508931 0.7246507882000646  
0.6664819754103236 0.8251486846811953 0.2079413096990688  
0.6702906799696470 0.5203987590936867 0.5351321538166586  
0.6287520879267222 0.2662861775624870 0.0054568468671745  
0.1773239997823902 0.7764919456639322 0.7856898599717910  
0.1149441307627768 0.0211161853188163 0.2870737482087412  
0.1036556253594969 0.2759468403993715 0.2818764063702028  
0.1770543712270840 0.5210685969999802 0.7820674703094271  
0.6134324542710624 0.0297964425377869 0.0310058769486403  
0.6834327667571071 0.7635939032214147 0.5004084633122158  
0.5963982943403463 0.4308809490059237 0.4350713606213888  
0.7121229920584071 0.3565658473056342 0.9266045016505422  
0.0955722497843847 0.8637889853730842 0.8774980928719927  
0.1997540012099837 0.9362302899176284 0.3747746985516620  
0.2003131915831592 0.3510106713438072 0.3634934148924386  
0.0923093228779802 0.4360694267196215 0.8713965582691218  
0.6969198082576937 0.9459603805872131 0.9377851075507714  
0.5991259802882959 0.8572304423551337 0.4255240346062253  
0.7122958157109465 0.3947822196193320 0.5176281405900783  
0.6001735421842037 0.3984908631736446 0.0098510211229275  
0.1898842482989387 0.9079683631256056 0.7538189006112385  
0.1064088756113764 0.8895747319943386 0.2494011087889319  
0.1077278531031785 0.4084132615761594 0.2490131883380626  
0.1884080346291625 0.3882747916671364 0.7538289324628017  
0.6069785139741346 0.8984527791069373 0.0667784101690637  
0.6914022066043062 0.8844823065507512 0.5669257307439972  
0.5146373837015394 0.5353571721448029 0.4716379069748438  
0.8043537844901436 0.2648272850097776 0.9771210400354946  
0.0112217261788490 0.7752581497582578 0.8021087648313767  
0.2876157841251270 0.0238746516206467 0.3000380617421543  
0.2990557800259625 0.2728711997805420 0.2998791694868977  
0.0014056802306500 0.5226262742952769 0.8054888817529019  
0.7898543097383258 0.0179749474902727 0.0292847055454710  
0.5084929208999949 0.7876315014561388 0.5269456652704007  
0.4764881088259845 0.4330175559412634 0.3503930401934961  
0.8323663748497355 0.3638079952188863 0.8482090375800919  
0.9698041082985686 0.8617643072885596 0.9419615126608534  
0.3216115611320971 0.9441852262975889 0.4521154110571657  
0.3190583773800322 0.3572390871537937 0.4502601683094005  
0.9685987580637355 0.4331054515109292 0.9453922521330307  
0.8191388961236763 0.9559358356693153 0.8595412362497694  
0.4710705375084847 0.8616387487656666 0.3702549553507394  
0.5324785842855304 0.4345894162743029 0.1713136282063668  
0.7593560213177352 0.3405149916762311 0.6868530478400988  
0.0338881088619879 0.8300422412465545 0.1074367038993919  
0.2679456643571507 0.9743545826945085 0.6284890999626267  
0.2646747121602284 0.3200898600466888 0.6247608562831888

0.0389278982656280 0.4671549160899564 0.1019996940057059  
0.7618504477032243 0.9654533244613843 0.6817443060256643  
0.5354813786491170 0.8333173374718847 0.2016159968048080  
0.4365802201807037 0.3492615816087178 0.2052576390631651  
0.8393542185300326 0.4475473323430081 0.6916547327739601  
0.9591260133116540 0.9405891806929879 0.1044121848057818  
0.3269763199261138 0.8547522768527428 0.6034888166026446  
0.3162954446638870 0.4425326019621810 0.6069830259592414  
0.9715380582337785 0.3518401975839937 0.1081235896317935  
0.8355769749648886 0.8560404112357564 0.7257519803531844  
0.4613083611321576 0.9443648641478150 0.2135827353736321  
0.5925090973955521 0.5269509656889888 0.0672567588223385  
0.7186793355488815 0.2618231457826693 0.5401474273882549  
0.0911705562820802 0.7552153017643345 0.2418949553870920  
0.1870411139688191 0.0434340949656919 0.7446422597713955  
0.1876370802526448 0.2529581294376300 0.7463655918341925  
0.0898772439503718 0.5425117353648363 0.2414567665892733  
0.6675755394767029 0.0173470255835067 0.5692619085393354  
0.6002005220162004 0.7629927513331756 0.0666446581576860  
0.8999176972068420 0.2385613076308158 0.1127392464590394  
0.3918181295146399 0.5539391420356936 0.5920190130333319  
0.3986719537035749 0.0613509681238660 0.2001638541609772  
0.8969161828494751 0.7381068259921297 0.7130653209380806  
0.8940627837340136 0.5688810137281066 0.7060414647193627  
0.4052028564168558 0.2220588083198270 0.2011402611917917  
0.3921145149510440 0.7372701121094332 0.5910972518352318  
0.9016390733789060 0.0595301621750754 0.121179824737003  
0.7758513268515757 0.2535510924287143 0.1721814219486621  
0.5189540060968364 0.5523341479783700 0.6886383402099054  
0.2890821454072678 0.0468690785079583 0.1005182949587305  
0.0064643052825700 0.7435152306273249 0.6062043931991545  
0.0059132832325431 0.5524715753803511 0.6083531107983666  
0.2931558562873863 0.2504197866786534 0.1021147852758677  
0.4991389217329958 0.7282365435866375 0.7046502790711081  
0.7883158787536995 0.0611406461907698 0.2197918452329220  
0.8087655719135258 0.1459445946008488 0.0649320336031290  
0.4900374734904129 0.6547780830837339 0.5345096940202456  
0.2995130072493571 0.1476463608322401 0.2335639687649316  
0.9939602677293100 0.6495073436960106 0.7483315397375684  
0.7244204784993192 0.2225068605905373 0.3488023096511655  
0.5678223960662020 0.5379790029853788 0.8727521769235111  
0.2179199935645700 0.0257112232500981 0.9360005681069862  
0.0711680154925207 0.7708523910549867 0.4375708577770868  
0.0699524550276593 0.5277833430932333 0.4375237457903275  
0.2187660216149072 0.2685587267267251 0.9388553450760959  
0.5637003052223482 0.7484699140874579 0.8765505612010976  
0.7163768136872238 0.0289956410174242 0.3826372310545517  
0.6439246222135286 0.2606443312735706 0.2024816154062602  
0.6501877235897922 0.5603860571471108 0.7245742882136105  
0.1583212061791068 0.0608790470723685 0.1061636993822687  
0.1392235426391210 0.7386578649793548 0.6013138334699063  
0.1377107154451809 0.5621777451019128 0.6005503168458395  
0.1619902233585733 0.2356394947419019 0.1123610218145516  
0.6282417338319173 0.7606421918955965 0.7033602463314091  
0.6567855239224045 0.0652457999744336 0.2139304615443447  
0.6912200191243351 0.1374729073717972 0.4953250240452574  
0.6029287631393621 0.6443628023793853 0.9860661049015118  
0.1890981562454515 0.1480141710038269 0.8678315580375667  
0.0847652193907793 0.6490943747559950 0.3605706300455017  
0.6073521230396463 0.2357282722377306 0.4377605273618816  
0.6916649828320633 0.5489173404856307 0.9391392477137658  
0.0943188010919848 0.0556915148742562 0.8883821646103435  
0.1890646130039054 0.7319120056967870 0.3707097884482218  
0.1882625547889191 0.5655578248839750 0.3679729712099814  
0.0943210158638322 0.2421359336266907 0.8868273597183398  
0.6919579774404494 0.7358590053474867 0.9268925075501729  
0.5919165299781309 0.0636527811172871 0.4225418527531948  
0.4984607883839864 0.1584006180180240 0.4385768321896594  
0.7871938734874624 0.6429315246267360 0.9446831279857943  
0.9988732207820561 0.1493552036068419 0.8730666292310586  
0.2922843731718356 0.6482563192991007 0.3703079644725034  
0.5044034035903846 0.2655877533996071 0.3219724340436383  
0.8025353705328875 0.5294164121487783 0.8393264303514633  
0.9748248135632094 0.0308658005346120 0.9587766200734958  
0.3009372159160067 0.7695123507599333 0.4564125461136291  
0.2977857425211786 0.5254265128969597 0.4557590763603265  
0.9736952327687499 0.2690009034587957 0.9521964461861264  
0.8143245964772028 0.7629523140196861 0.8639934015767303  
0.4719716297639326 0.0363434296835728 0.3599434418668426  
0.522052357471367 0.2599478477788907 0.1255773968680670  
0.7726477452865088 0.5601288095383694 0.6469957684600955  
0.0299976002949709 0.0519540144468112 0.1398679430570455  
0.2669820261222056 0.7391470577038506 0.6468157734838151  
0.2660264949598083 0.5626138646459161 0.6433939052508957  
0.0303699999163893 0.2327572927997165 0.1259232510179543  
0.7696977370652491 0.7439339982215019 0.6753711809263194  
0.5277527303507467 0.0579968838174899 0.1794925037786937  
0.5999560063716803 0.1537668936268564 0.0957839983417507  
0.6859304897117169 0.6487381182405184 0.5834317902834972  
0.1014598602026231 0.1471794395059961 0.2313282901141888  
0.1866937740990701 0.6495455919401077 0.7327190821048647  
0.6314523386234391 0.6258745415400049 0.3915353887317011

0.5155473204005487 0.7016609929028821 0.3356839613845825  
0.7495958326716838 0.7174019874173057 0.3207585378232952  
0.4176355267683928 0.5977667401887301 0.3552907454910031  
0.7992080543549998 0.6350860404383859 0.4631552440998009  
0.5381667457306450 0.5783819389776182 0.2697194697238622  
0.8292234002630182 0.4608185960541724 0.0999447763055024  
0.4706345315246568 0.3410880494120362 0.5920405937355936  
0.3255066030689794 0.8267473468460336 0.2071876661811383  
0.9707421327034618 0.9728096846667598 0.7016738117410722  
0.9698935702847103 0.3254605660804042 0.6968989660200964  
0.3246354208892706 0.4715317723279610 0.2030677617948894  
0.4762587271165718 0.9788626214846951 0.6063930671200959  
0.8230394648925405 0.8240815841786922 0.0982698039080038  
0.7228402775454094 0.4294610470868048 0.2551061783782614  
0.5817588314182577 0.3616486392567803 0.7312996460308125  
0.2233318818132745 0.8606900364867527 0.0534648378147031  
0.0733096451471751 0.9345823973405434 0.5507595183997509  
0.0743445514123277 0.3638881449484997 0.5493592367479903  
0.2237763269399011 0.4362194165064593 0.0517646044928181  
0.5622399119467733 0.9286993646459282 0.7726888285712822  
0.7273985265240898 0.8682400715732271 0.2558991703642055  
0.6716391170897192 0.4551015862836135 0.4621429586277760  
0.6348086586197053 0.3377491874178277 0.9464033104934080  
0.1709325712139695 0.8507754148739698 0.8362649628867999  
0.1239933957233188 0.9460147742497446 0.3338755562938227  
0.1228786779403493 0.3488913106803335 0.3294421236221802  
0.1686964763723099 0.4471430561688254 0.8332612278682696  
0.6218716294130445 0.9551900322684351 0.9818271370642101  
0.6742931929294826 0.8428228170234638 0.4653553348356286  
0.5193894990616257 0.4545418771587637 0.4481012826265933  
0.7902090998773373 0.3434309350116672 0.9475122523638928  
0.0183251276713977 0.8516090744084450 0.8458058776170597  
0.2778191356792002 0.9495087754953425 0.3500350572491539  
0.2799263235809818 0.3466768979665507 0.3450835358436494  
0.0138507628680835 0.4459717322266477 0.8458373756021318  
0.7759089955809686 0.9509570967467076 0.9624979872212908  
0.5221888190629101 0.8562333471938512 0.4645457255456605  
0.4638581589640752 0.4248628510158326 0.2307117008474402  
0.8298846682488801 0.3690138968338923 0.7259657945020647  
0.9666408554040152 0.863233339164876 0.0643331899789994  
0.3281101101706003 0.9345507985866532 0.5735511195136749  
0.3226745019608031 0.3642858283564905 0.5724202610840894  
0.9718169832078674 0.4295357160586236 0.0680239471149075  
0.8263148063382999 0.9366943398759354 0.7406048946995912  
0.4686883530100792 0.8655514106764823 0.2473881948681135  
0.5977867201411541 0.4493286801613833 0.1058935489652209  
0.7051773010642531 0.3326696002197575 0.5973943917543826  
0.0993522920210836 0.8240331555772638 0.1765384276989611  
0.1956215673198141 0.9737399214780441 0.6810987307639867  
0.1940346085031910 0.3221956761888493 0.6816329563641029  
0.1016015980373842 0.4740073752294129 0.1766026197463114  
0.6888692278388108 0.9523405562104295 0.6357252662252635  
0.6020546976729267 0.8306910911963669 0.1347077411215071  
0.8226388000452978 0.225706854559446 0.0820888861334920  
0.3191183347769516 0.0695469515150510 0.2095648174402230  
0.9761836245645411 0.7272050035344031 0.7180944786841819  
0.9742047644719252 0.5726981825184921 0.7175548688654279  
0.3244861990140290 0.2240308391286019 0.2090438870979570  
0.4721151553173736 0.7274675971612594 0.5884725015127126  
0.8224534825968315 0.0705929780586756 0.1087135521563302  
0.7174453811339113 0.2714955913591624 0.2508797972166192  
0.5791438195465854 0.5234731001334361 0.7526698366253306  
0.2192240205254163 0.0179864624676657 0.0580922077755612  
0.0734168951041876 0.7772493417681879 0.5598510040714011  
0.0733736917423687 0.5211383807515833 0.5597206859085339  
0.2220843669348030 0.2779936896121769 0.0606269037950716  
0.5586852917194953 0.7717563132212408 0.7586328431308609  
0.7203217001136775 0.0255444820972572 0.2599135482576160  
0.6844368500680492 0.2144616850119603 0.4551465345313457  
0.6142814682465714 0.5650831716797079 0.9637804230683980  
0.1715339318432696 0.0686404882888035 0.8585147779478792  
0.1096768378485681 0.7265883407657752 0.3525413733411042  
0.1088509783047392 0.5713588168195721 0.3519587688250638  
0.1718763278413678 0.2275349235731718 0.8598098209655904  
0.6152065412581025 0.7235779647872234 0.9622367445076401  
0.6670099292540612 0.0616740610549579 0.4670876811826382  
0.5270558978801181 0.2349660001656942 0.4300069265417322  
0.7706900033770228 0.5627400309242343 0.9402428420120503  
0.0158092983404975 0.0694150531589159 0.8700413634038118  
0.2687542141270305 0.7273375270858269 0.3638915277402863  
0.2681422545153733 0.5689401923724526 0.3634623508462090  
0.0157958150260238 0.2291485001326158 0.8660216712858221  
0.7707090548470464 0.7233750543119640 0.9476412018981339  
0.5137717664221081 0.0780292080143686 0.4445918838636568  
0.4675942359531398 0.2733772802941179 0.2138335731027727  
0.8267104663582826 0.5258315923285439 0.7229464077756584  
0.9671112393512720 0.0207860087719620 0.0805098078422629  
0.3217798796212833 0.7750982835517433 0.5751311052972574  
0.3203319900126074 0.5221236286741849 0.5749511586255810  
0.9688589083551745 0.2728556430543328 0.0750952277915822  
0.8274089550529521 0.7750793462497306 0.7432664931482912  
0.4656942265010259 0.0245973546637042 0.2384769618131151

0.5983548756322680 0.2347525584770904 0.1085048058456635  
0.6935534280876959 0.5716761874408107 0.6233341335011912  
0.1007851035796552 0.0696817641689937 0.1910474235470267  
0.1929578171626567 0.7266086609318800 0.6916422700146407  
0.1926638392044736 0.5727097516597875 0.6898075118351678  
0.0993943252871781 0.2238503387675823 0.1877607421518272  
0.5990703147526354 0.0755349078180870 0.1300259158145958  
0.519965936711514 0.6261367585079750 0.3865318189186311  
0.7045910542947068 0.6779943899498617 0.4255950057728799  
0.7374028150702497 0.7022467090709675 0.2527257401892413  
0.4207445157566388 0.5742901772278148 0.2902861983499793  
0.3833326484765805 0.6327478170944654 0.3483978712913288  
0.8106467023160954 0.6229466937996591 0.5330043539101806  
0.8346495457037590 0.6620928264523602 0.4334383520098267  
0.5368644541854212 0.6074911014846581 0.2101073031430577  
0.7262968457054065 0.6501594633288507 0.1276466689196765  
0.6637274283890832 0.5884732984547948 0.1775150128275661  
0.6324890943443431 0.6050836634279024 0.3242771335981179  
0.7526493506063481 0.5846334408431221 0.2219635969559742  
0.7135652945487819 0.6093475388694547 0.1791843264465517

Structure TS CH4/16vv→18v S=8/2

1.0000000000000000

20.1473007202000005 0.0000000000000000 0.0000000000000000

0.0000000000000000 19.7681999206999990 0.0000000000000000

0.0000000000000000 0.0000000000000000 13.2308998108000004

Al O Si Fe H C

2 198 94 2 10 1

Selective dynamics

Direct

0.4770030908904275 0.5715677882491974 0.5764680818412344 F F F  
0.6915632567548116 0.7342400671091411 0.6316301572383836 F F F  
0.9090346171427015 0.4697743575835744 0.1143446145780018 F F F  
0.3930401293389210 0.3323336316550751 0.6111882555479440 F F F  
0.4044904098170647 0.8234510954540468 0.2034386890512110 F F F  
0.8910533282642774 0.9735275157518473 0.6974806510200580 F F F  
0.8911286365780100 0.3264114719707223 0.6776904305756730 F F F  
0.4079975521154040 0.4775621965318848 0.1962163972193025 F F F  
0.3942245446362875 0.9693790018620163 0.6123196328452849 F F F  
0.9020458138170468 0.8213981579298562 0.1067818975952264 F F F  
0.7936969765696418 0.4552653186539715 0.2075140376922846 F F F  
0.5091524134206296 0.3361453415022169 0.6977302903028786 F F F  
0.2942036953986147 0.8333380691068655 0.0936548079021406 F F F  
0.0036302951907032 0.9679205411633660 0.5923717706510914 F F F  
0.0064078646183532 0.3290080704529430 0.5864205306508907 F F F  
0.2978998755959879 0.4629868831931034 0.0875431483330971 F F F  
0.5040373880300635 0.9779899895860211 0.7210555671277419 F F F  
0.7959803012652031 0.8404396021379910 0.2180163584159303 F F F  
0.8008262830863089 0.5231570864460195 0.0355883700423263 F F F  
0.4952700307001763 0.2809018929618432 0.5146526943304011 F F F  
0.2944670817531616 0.7583750698272596 0.2588998525392228 F F F  
0.9960593750099775 0.0406486677766651 0.7604838422211557 F F F  
0.9927514164760680 0.2565478812450053 0.7552416626674230 F F F  
0.2991816944108763 0.5412513226348565 0.2531361789355202 F F F  
0.4903713984750127 0.0532893133251378 0.5574575109677440 F F F  
0.7909887474851658 0.7539515965011034 0.0622370775428251 F F F  
0.8172134616665758 0.3879618769156821 0.0404926083938619 F F F  
0.4867179622901361 0.4154958228379755 0.5421533911986103 F F F  
0.3020674629629099 0.8929407353921377 0.2719677618820739 F F F  
0.9959949668416286 0.9060700583441346 0.7679888176060459 F F F  
0.9929786724296576 0.3911236108201166 0.7616033212581996 F F F  
0.3039590879135829 0.4076283525185360 0.2689189978514932 F F F  
0.5089999331264536 0.9217515109607319 0.5388605019864343 F F F  
0.7965349726667412 0.8856133064831155 0.0305307999233122 F F F  
0.7089281319700902 0.4705036057060354 0.3517172949022154 F F F  
0.6008589579113419 0.3261817875849999 0.8343558988651765 F F F  
0.2230905895156425 0.8568907991537174 0.9305829857253087 F F F  
0.0714401296248752 0.9365705112315297 0.4287161590467647 F F F  
0.0771024593494047 0.3607344863179307 0.4268318337935852 F F F  
0.2202310211735963 0.4407103716929512 0.9296890871396570 F F F  
0.5659718885902905 0.9505680386908111 0.8927611579464667 F F F  
0.7239350197439904 0.8657192301449044 0.3821658546617073 F F F  
0.7283709248321415 0.3469482942574444 0.2810115453301236 F F F  
0.5927679349972550 0.4409540307348365 0.7297270726358605 F F F  
0.2122605500001171 0.9394968526181628 0.0901786986570130 F F F  
0.0773064529090206 0.8560911510548834 0.5913962840088871 F F F  
0.0816874882909460 0.4404385396309038 0.5899187701511650 F F F  
0.2150622199629879 0.3568627510820690 0.0881272349870130 F F F  
0.5420288135720597 0.8534004857721271 0.7565251249589977 F F F  
0.7192613044604173 0.9499802417728489 0.2263552319267106 F F F  
0.6661164374724606 0.4355981000511804 0.1658466708911064 F F F  
0.6332727450902524 0.3292850434388441 0.6402697185488364 F F F  
0.1629440648214882 0.8176793013532446 0.1010129160181705 F F F  
0.1363425570413312 0.9739727774436986 0.5947009917878034 F F F  
0.1372671005285540 0.3204726015220700 0.5954237364792050 F F F  
0.1693636703876749 0.4810785035055929 0.1068366397331602 F F F  
0.6338470851366509 0.9498083313255989 0.7261693135881870 F F F  
0.6652632676132768 0.8284448507076760 0.2098928771958891 F F F  
0.6729532524883268 0.5256847376287510 0.5237566538393139 F F F  
0.6285279542969633 0.2634646930686699 0.0005937098618602 F F F  
0.1805695497495989 0.7755520584796045 0.7876153583787797 F F F  
0.1111183773443685 0.0202908098424146 0.2865920213735365 F F F

0.1059205841296489 0.2763136888023467 0.2813894911944317 F F F  
0.1819933025359788 0.51955531471191330 0.7811177862146579 F F F  
0.6155828881294454 0.0268885033723549 0.0368019985634831 F F F  
0.6775722346527147 0.7670733816730078 0.5058228288671671 F F F  
0.5981436511632836 0.4296169297609964 0.4371310866885452 F F F  
0.7134347370619452 0.3551856609408759 0.9278105507894310 F F F  
0.0964372340413107 0.8608287053133168 0.8797095050971535 F F F  
0.1973798455311098 0.9360353695586525 0.3735492712729993 F F F  
0.2012963572612207 0.3530687607875151 0.3627621272648511 F F F  
0.0946432601828420 0.4369963606875373 0.8708794917057645 F F F  
0.6955545831087093 0.9434905137819172 0.9365501959734388 F F F  
0.5957908134629761 0.8594670247709360 0.4238106753888076 F F F  
0.7150332527103060 0.3996798232017937 0.5215154206391759 F F F  
0.5991079799278580 0.3950568094097875 0.0049720454401267 F F F  
0.1873777063310555 0.9071255548017447 0.7524154497930056 F F F  
0.1042768150346234 0.8887537312835931 0.2485433691948558 F F F  
0.1076433986873226 0.4087211901748375 0.2477899456058736 F F F  
0.1890686341347561 0.3865557714022430 0.7531609045096630 F F F  
0.6046033043006958 0.8943021051836268 0.0619376678637167 F F F  
0.6847775661829019 0.8880080984803485 0.5694290455782323 F F F  
0.5172040056995044 0.5351476644884983 0.4678230589798886 F F F  
0.8071353119848510 0.2636470685316397 0.9724324151414407 F F F  
0.0126653985888652 0.7739495573339852 0.7992786894325263 F F F  
0.2851704850746160 0.0242432111053859 0.3009387630138249 F F F  
0.2991525144429801 0.2742264347421965 0.2969378839510171 F F F  
0.0036010256456223 0.5220145098261213 0.8015248050372534 F F F  
0.7854012336479244 0.0194472236400642 0.0272695350141063 F F F  
0.5080547946001914 0.7883513812144685 0.5279926543024160 F F F  
0.4790937431283595 0.4312515959671686 0.3486946378005698 F F F  
0.8330357466400997 0.3653547977662015 0.8468830661876297 F F F  
0.9712290260596603 0.8549386709060300 0.9453717432287334 F F F  
0.3188124172199522 0.9439145179215771 0.4526316554022145 F F F  
0.3201564959239391 0.3563108263340169 0.4496704576655617 F F F  
0.9709943255173030 0.4347471559761331 0.9444377219293756 F F F  
0.8198981195882382 0.9522204092672055 0.8640011801002245 F F F  
0.4680661623609268 0.8611422044817232 0.3710667445328468 F F F  
0.5342785876299203 0.4315541284216380 0.1690334017629311 F F F  
0.7605885567756161 0.3395205122487752 0.6860966119757776 F F F  
0.0319369108888523 0.8207130561000824 0.1147027353109138 F F F  
0.2657620808383570 0.9746146519273324 0.6291761118593513 F F F  
0.2659702007551914 0.3191936329281901 0.6241270665340082 F F F  
0.0393246172638442 0.4706997481845860 0.1029614375410546 F F F  
0.7626607760047435 0.9591258309616961 0.6868715859422920 F F F  
0.5341288327714011 0.8333220583893777 0.203005801150326 F F F  
0.4373394019906343 0.3481966722573588 0.2038662040979986 F F F  
0.8378201118539721 0.4490161384205607 0.6904065657313438 F F F  
0.9692478194251493 0.9378259633553867 0.1040317770172621 F F F  
0.3261187197092781 0.8554474656312294 0.6049378209927241 F F F  
0.3165080463342989 0.4422037662514455 0.6056660304160388 F F F  
0.9749503501402970 0.3539134034181899 0.1072844501470058 F F F  
0.8407553886749852 0.8532473298447201 0.7293168948219204 F F F  
0.4611947468038622 0.9447389540492921 0.2148234654303494 F F F  
0.5928546643904795 0.5232588025363185 0.0621331152701643 F F F  
0.7231584383954441 0.2660755139707831 0.5306207013066384 F F F  
0.1010912364738914 0.7533608092678321 0.2452347858809176 F F F  
0.1846729508888103 0.0426503348025946 0.7462491412737435 F F F  
0.1886872171588152 0.2514109452586055 0.7449600575393873 F F F  
0.0945236347750154 0.5435281682365343 0.2413719575895712 F F F  
0.6774872866388648 0.0227881812677353 0.5741169846340171 F F F  
0.6010559245287297 0.7587915727445633 0.0750983160857857 F F F  
0.9004810551878677 0.2427929309991654 0.1139964666340987 F F F  
0.3942186236623186 0.5528161066041335 0.5894552112096747 F F F  
0.3975741867147704 0.0612178637948517 0.2044859358174520 F F F  
0.8968855000227762 0.7330621766507903 0.7188294783016218 F F F  
0.8955318252341797 0.5687698269318275 0.7043354910481696 F F F  
0.4048889565738563 0.2212728048483754 0.1987984389199653 F F F  
0.3937504645453345 0.7390554230203605 0.6009684495698906 F F F  
0.8995138906304518 0.0492835931991280 0.1228766294884167 F F F  
0.7739548407054357 0.2487481058412158 0.1648990555577967 F F F  
0.5204076556688406 0.5505142674347354 0.6836172122978397 F F F  
0.2887986078506373 0.0483235536868492 0.1016870491065731 F F F  
0.0034451068303838 0.7449691702513448 0.6035560922546708 F F F  
0.0064873778527712 0.5503001932021903 0.6039085626584537 F F F  
0.2930255606406504 0.2482890974001393 0.0999150733096599 F F F  
0.5030922801282500 0.7299540978263721 0.7075361899765795 F F F  
0.7859645482130730 0.0655911574491768 0.2159647300919403 F F F  
0.8174294827807103 0.1447686403432442 0.0586069961923030 F F F  
0.4910212957867230 0.6564681755278485 0.5365654078131286 F F F  
0.2989450598371732 0.1481846433222032 0.2360687406410094 F F F  
0.9973944975590783 0.6481303584587010 0.7428998368536739 F F F  
0.7238667889464310 0.2196307221909350 0.3428226021587406 F F F  
0.5693573603864905 0.5361274822891744 0.8673869665162428 F F F  
0.2177094307913165 0.0258925071849063 0.9373202910154532 F F F  
0.0737983806407669 0.7705885297874318 0.4388138162791009 F F F  
0.0751440647999431 0.5254370252814198 0.4366072500273575 F F F  
0.2181403857412363 0.2689632019804762 0.9376091475179109 F F F  
0.5636724789595249 0.7529653966170642 0.8834472902615076 F F F  
0.7200200048474983 0.0340047263480940 0.3843013489814098 F F F  
0.6432430249372132 0.2609096533407111 0.1980328188246077 F F F  
0.6515472303430627 0.5583006923885847 0.7181940232462694 F F F  
0.1577327515502844 0.0605729557956636 0.1077845082919993 F F F  
0.1360452735991515 0.7366703702448731 0.6074238419498101 F F F

0.1383050693996850 0.5616146732622695 0.6027198344204621 F F F  
0.1618409963664007 0.2349294903554622 0.1107516229112946 F F F  
0.6325697831272711 0.7594774804492204 0.7145435274971206 F F F  
0.6540006148614808 0.0661697517110937 0.2200049673670605 F F F  
0.6878158779486085 0.1417776653864919 0.4958314102700143 F F F  
0.5970863382317617 0.6426729823124617 0.9850543671739231 F F F  
0.1890206829890673 0.1476944431357268 0.8685967880883751 F F F  
0.0878288016202973 0.6483796452415476 0.3645069043736413 F F F  
0.6090944481397003 0.2427307749898588 0.4345879472609369 F F F  
0.6914627154709265 0.5532673095855642 0.9368534996675066 F F F  
0.0937704571376017 0.0561081835576616 0.8921614310514983 F F F  
0.1935074620871973 0.7289060919515791 0.3830263857044400 F F F  
0.1927867281130204 0.5674691754937840 0.3676200415975330 F F F  
0.0941261940755211 0.2418386163173096 0.8840047361197776 F F F  
0.6908891709981830 0.7313867825976175 0.9336810961276001 F F F  
0.5940170144395367 0.0574131826631188 0.4293824449159160 F F F  
0.5057180436102229 0.1577599924074420 0.4385788945450173 F F F  
0.7900422613220357 0.6427464053571299 0.9515988521742287 F F F  
0.9980924338247021 0.1492394340962448 0.8743501881389477 F F F  
0.2988562688245580 0.6480587007592788 0.3702621180627119 F F F  
0.5049734672251489 0.2628587691293447 0.3179808924360970 F F F  
0.8024574426723987 0.5327901423609873 0.8367787912892481 F F F  
0.9733698608244836 0.0301194207529392 0.9583940902340231 F F F  
0.3087104985630234 0.7690746626481300 0.4561141284836481 F F F  
0.3021667386630185 0.5241155434523961 0.4521896294205590 F F F  
0.9745865873172264 0.2696495642917682 0.9525333923417989 F F F  
0.8105593503930280 0.7615631933977411 0.8645687545976415 F F F  
0.4743355224557604 0.0366245436785420 0.3609223302246392 F F F  
0.5216987709651164 0.2584069480574058 0.1212331779582527 F F F  
0.7735663915190329 0.5626051265381307 0.6436571792330312 F F F  
0.0285286627970720 0.0557166666880704 0.1380398894359018 F F F  
0.2656720067261134 0.7392100783892417 0.6419557134812308 F F F  
0.2675404772723837 0.5629589792184291 0.6382271197484783 F F F  
0.0306234076701273 0.2335056973825402 0.1271365070661616 F F F  
0.7719506311641879 0.7443797972679747 0.6711178169261203 F F F  
0.5259765776672936 0.0588265640909142 0.1779314350118995 F F F  
0.6006196164113149 0.1523589041524218 0.0937939225654176 F F F  
0.6842176721971214 0.65006815273362534 0.5807651854090565 F F F  
0.1017099944497843 0.1475252737704622 0.2323687507993952 F F F  
0.1897468483496425 0.6484247137494847 0.7335312526460172 F F F  
0.6178747650476950 0.6297570757681754 0.3782945913216196 T T T  
0.5152000356172977 0.6990416055174364 0.3246240107312346 T T T  
0.7285231459252444 0.7228666562949684 0.3190511143089552 T T T  
0.4272776013044037 0.6002986642369450 0.3573090872371765 F F F  
0.7911756239848629 0.6470789633608760 0.4476308041054935 F F F  
0.5339154285215955 0.5699110957970746 0.2616929376103769 T T T  
0.8298166209111884 0.4594814385580719 0.0980563726512358 F F F  
0.4713285546379353 0.34085131566628246 0.5895250565772940 F F F  
0.3241298257658016 0.8270565208498297 0.2076644683243600 F F F  
0.9712455898426171 0.9718102269447115 0.7051079416172570 F F F  
0.9708081794057222 0.3253587692700464 0.6964925625486202 F F F  
0.326989777746635 0.4717117049547710 0.2017398287670531 F F F  
0.4736143075267520 0.9799180954992721 0.6072387560132029 F F F  
0.8217665023580381 0.8252205435165791 0.1034330520992199 F F F  
0.7237287793465015 0.4264360643118295 0.2507448644134982 F F F  
0.5839646452990834 0.3597631606497060 0.7264015694646133 F F F  
0.2231538562456308 0.8617898781912530 0.0527692964876039 F F F  
0.0721391097133477 0.9338051813185544 0.5511445796772705 F F F  
0.0757362463110880 0.3628385519424953 0.5488187038578403 F F F  
0.2253843303954355 0.4349978682460005 0.0513211247841880 F F F  
0.5616235735916106 0.9320203965475642 0.7734226930400894 F F F  
0.7262664094174056 0.8710723182317182 0.2597554894834175 F F F  
0.6731932879695606 0.4560849671667881 0.4594979616236543 F F F  
0.6359164200719292 0.3351642321583483 0.9425566900228972 F F F  
0.1716736884350354 0.8500576290442652 0.8365535921104055 F F F  
0.1214091022678403 0.9452967402350012 0.3332731886058866 F F F  
0.1238761724462663 0.3496538053854010 0.3286367730089950 F F F  
0.1712090781033098 0.4460422407012246 0.8324795679328858 F F F  
0.6209417269444089 0.9539390382714430 0.9820487775527269 F F F  
0.6699734521390326 0.8458695917881798 0.4678706225718940 F F F  
0.5211061856638537 0.4541186999758722 0.4469041201980986 F F F  
0.7919328764776239 0.3425684088598899 0.9459741503710362 F F F  
0.0192338276328172 0.8490232099316088 0.8476895760124421 F F F  
0.2755481238860398 0.9495916540562490 0.3500929883245689 F F F  
0.2808697379802680 0.3476291433846299 0.3442263679625341 F F F  
0.0162509014409480 0.4461585844965228 0.8445345444065637 F F F  
0.7740126308715745 0.9502952470114039 0.9643429415894502 F F F  
0.5193266212714747 0.8571073630628092 0.4653655031175958 F F F  
0.4656905829555456 0.4234913952872930 0.2291789169959060 F F F  
0.8304128925546905 0.3703529248581461 0.7246465193286511 F F F  
0.9686142328195757 0.8594017171056905 0.0676727774733124 F F F  
0.3259397749634232 0.9350837081276211 0.5741040947402070 F F F  
0.3235967288016610 0.3638644733239005 0.5718048187945328 F F F  
0.9734392166120074 0.4315811435219246 0.0670680911389709 F F F  
0.8281110870551913 0.9333420911572716 0.7451580655096706 F F F  
0.4671535006580498 0.8658068957932414 0.2482138332157575 F F F  
0.5985025212873154 0.4456580436920348 0.1011051925278537 F F F  
0.7076554230035441 0.3339845739167728 0.5944856990969498 F F F  
0.1003422618603906 0.8217210261739680 0.1780008602830350 F F F  
0.1934000844332857 0.9736288392909032 0.6813672641520228 F F F  
0.1951933050965451 0.3207951941764833 0.6804833346220249 F F F  
0.1031048519773989 0.4747992958393468 0.1759294733507701 F F F

0.6894468414743784 0.9550857679134594 0.6393023394899018 F F F  
0.6005722855709621 0.8297338723816807 0.1361011638068845 F F F  
0.8251935155499126 0.2250964787093110 0.0779737646316434 F F F  
0.3180429231767903 0.0700451199825309 0.2117470556880505 F F F  
0.9765890251654170 0.7256135431004793 0.7166651799333934 F F F  
0.9757650706893202 0.5715615049967084 0.7134656993573714 F F F  
0.3242877575041518 0.2238867730877701 0.2078584013729525 F F F  
0.4737499541192562 0.7278190940567200 0.5923546402951985 F F F  
0.822507869633270 0.0694337163421679 0.1060241565149695 F F F  
0.7174339396983669 0.2690144682335429 0.2452098675626715 F F F  
0.5805232613268956 0.5216350244957439 0.7472321086221996 F F F  
0.2191560722166557 0.0186456858413777 0.0594992734559909 F F F  
0.0726447347249959 0.7767766136242784 0.5612456171521387 F F F  
0.0754195470232801 0.5196534327686848 0.5590441309260115 F F F  
0.2221997622835374 0.2771516998833263 0.0595075592879155 F F F  
0.5614439263497601 0.7734167774718870 0.7637752527204000 F F F  
0.7202376177940621 0.0289248560351822 0.2616367467794660 F F F  
0.6851296632119244 0.2176176835598440 0.4508410324171592 F F F  
0.6132587995647683 0.5643210934784477 0.9603865653558685 F F F  
0.1707588293533391 0.0684631115543297 0.8602241244783926 F F F  
0.1147124492949274 0.7253187801244252 0.3576255928233039 F F F  
0.1131198664453308 0.5711606096121713 0.3526488077045826 F F F  
0.1718706745654544 0.2271285421999707 0.8586279604281088 F F F  
0.6135660016727940 0.7219582722919640 0.9672166680023153 F F F  
0.6698368598667912 0.0639723403605785 0.4700361850318515 F F F  
0.5290352003755672 0.2358741254464434 0.4272268900480967 F F F  
0.7709387686080120 0.5635474262976672 0.9397291659484210 F F F  
0.0154352826842654 0.0693602742081225 0.8713274086534142 F F F  
0.2728945061245582 0.7265766967505343 0.3670435948588562 F F F  
0.2726282747555260 0.5693701984930257 0.3617427536251654 F F F  
0.0153488683006131 0.2289691568870182 0.8656935079303665 F F F  
0.7702048423646985 0.7223150217074163 0.9525177301050576 F F F  
0.5164231522274108 0.0768929151120261 0.4467514246001727 F F F  
0.4677656449194103 0.2720169329481834 0.2105907299700505 F F F  
0.8268221396736024 0.5278358205786873 0.7203693772006403 F F F  
0.9682780135601519 0.0182879762377439 0.0801819682892244 F F F  
0.3237582736581643 0.7754857640713553 0.5770070047302980 F F F  
0.3226692775171358 0.5214874089028925 0.5724766078035159 F F F  
0.9702464661760715 0.2748314286171549 0.0753877994713150 F F F  
0.8281776548670976 0.7727033312099110 0.7451471107736083 F F F  
0.4654183130090246 0.0249415475313199 0.2399692295406837 F F F  
0.5980083273835959 0.2334915047029256 0.1046264852140624 F F F  
0.694956221761455 0.5726694830882977 0.6180559978930731 F F F  
0.0994899144250070 0.0702108814821543 0.1912790245061231 F F F  
0.1934584847628571 0.7256734947482713 0.6925140125447982 F F F  
0.1952387999318361 0.5719376839923385 0.6890105501758654 F F F  
0.099952610534578 0.2240232642661084 0.1878630216558292 F F F  
0.5986058568079287 0.0750280694096190 0.1320812187083220 F F F  
0.5245661755843827 0.6237129733261284 0.3724879267856807 T T T  
0.6895761879670275 0.6811365916107377 0.4277719934949005 T T T  
0.7024737068960647 0.7311336071911683 0.2581091625808511 T T T  
0.4274047784952728 0.5767361020551931 0.2918057296432153 F F F  
0.3936888682120454 0.6363448648599288 0.3544762277751374 F F F  
0.8112418046428971 0.6476224141848945 0.5149432857184593 F F F  
0.8168777361690331 0.6763740079929619 0.4028477623597908 F F F  
0.5463372250067451 0.5960234293083886 0.2018044844990357 T T T  
0.6824639238817056 0.6465273515671583 0.1705639586521244 T T T  
0.6666115688413541 0.5551852440773999 0.1808896280606049 T T T  
0.6392663105694609 0.6122851828197469 0.3055114263608871 T T T  
0.7345354930861774 0.5938264829728581 0.2549809128807397 T T T  
0.6878098932296908 0.6001664097084145 0.2145794114020489 T T T

Structure 19v S=8/2

1.0000000000000000  
20.1473007202000005 0.0000000000000000 0.0000000000000000  
0.0000000000000000 19.7681999206999990 0.0000000000000000  
0.0000000000000000 0.0000000000000000 13.2308998108000004

Al O Si Fe H C

2 198 94 2 10 1

Direct

0.4770847154167682 0.5757156270926537 0.5972917421497734  
0.6972177009970218 0.7380387675142215 0.6203346048779951  
0.9103975779121695 0.4717604569923933 0.1221688465416652  
0.3998583773498323 0.3295929530334664 0.6206749323084628  
0.4130644179683843 0.8238294322105467 0.1928113392678888  
0.8981405620015633 0.9777822080802736 0.6841991610305616  
0.8983726541527675 0.3307956384733303 0.6927127246383473  
0.4104949578941358 0.4844831148416056 0.2144858967111742  
0.4052620949413639 0.9644325940444257 0.6104100445894370  
0.9127397831281993 0.8239352519939953 0.0988694989865598  
0.7984869985138652 0.4609023065522866 0.2287045886515333  
0.5103568643614633 0.3463357145692429 0.7252764208719717  
0.3014454420790775 0.8332845783702713 0.0892190702907278  
0.0133112964193923 0.9735711719764835 0.5853025264480456  
0.0100724655001404 0.3370501541638679 0.5920495623734798  
0.3033728405562084 0.4661461662730524 0.0942986427095741  
0.5173314613745063 0.9705898557530250 0.7125133814351808  
0.8026534590596093 0.8498575537753549 0.1969260448406437  
0.8020255677746319 0.5380848356493046 0.0681158501247977  
0.5106453023153600 0.2715853264161431 0.5561121224652190  
0.3080332232717725 0.7549394161015586 0.2539424237463396  
0.0005853948151794 0.0457760500146970 0.7546990423571134



0.0051070484186637 0.2650789899724729 0.7608475330599800  
0.2962085828810860 0.5429515408068297 0.2578706378453333  
0.4987861524203050 0.0504022468072847 0.5554867955422361  
0.8004037335216628 0.7612229488166232 0.0472992688931890  
0.8067141344364127 0.4029730767069960 0.0496989658386947  
0.4968766822040965 0.4068200255657566 0.5502681936472610  
0.3102632357484228 0.8897480129742342 0.2696500503779596  
0.0034340671994712 0.9110922085683030 0.7572709862356668  
0.9999644088777304 0.4000506119875455 0.7672905301972227  
0.3074025815763181 0.4086500601405922 0.2741201101782118  
0.5192526642373635 0.9199808052661487 0.5272907836310312  
0.8168440867020114 0.8921211485954122 0.0067339354830485  
0.7310161610600954 0.4649569667590563 0.3960720562818454  
0.5875441504980347 0.3603824093132038 0.8840627758022649  
0.2267168888547023 0.8573110896672168 0.9293838597743688  
0.0831725904813484 0.9403420255205164 0.4262560702726798  
0.0835551708585245 0.3594246149529468 0.4323897880777779  
0.2269586665696798 0.4475171102831867 0.9333209660773526  
0.5812244489085513 0.9628630492757574 0.8826107316772002  
0.7315985962059457 0.8547408179329712 0.3605503474095977  
0.7221018418510097 0.3557725540075350 0.2781756044842367  
0.5924280290593694 0.4547069787091785 0.7412668976995489  
0.2217562417352455 0.9418084730634335 0.0862970619437483  
0.0847732206484907 0.8586182809040105 0.5868992466114417  
0.0893858399621716 0.4451025679986917 0.5884442496557073  
0.2238535598885840 0.3584942491216467 0.0861552031225960  
0.5514234150802442 0.8498995682474672 0.7841071466755598  
0.7144541618644883 0.9496479057421549 0.2190936584374057  
0.6639411467892621 0.4693880360008674 0.2263899754805191  
0.6386137560024338 0.3325367359056349 0.7029512636426238  
0.1719398555279193 0.8186805517376489 0.1045274078688793  
0.1456721374764375 0.9762626009753695 0.5943757135160469  
0.1407645675126435 0.3236082025601968 0.6057679641812314  
0.1724480035597204 0.4800952178901718 0.1096347570781984  
0.6455999392866574 0.9323542828767788 0.7158274804326241  
0.6727957831732685 0.8256347680594646 0.1847964481506979  
0.6832479020687663 0.5195209503121828 0.5611756326520098  
0.6285434239847126 0.2739639318700404 0.0224044513553602  
0.1876540853093224 0.7795171308726165 0.7803340713600935  
0.1219521096175595 0.0231908303313552 0.2828649009735291  
0.1206841271430496 0.2746977368827842 0.2904878604568685  
0.1815304358140139 0.5251417618468527 0.7862618193444204  
0.6266925373976798 0.0383687369566307 0.0299500035980894  
0.6875114077826855 0.7619457637611005 0.4893047667448471  
0.6071038920840797 0.4369366572011010 0.4501565612845308  
0.7163328427747648 0.3504353888765834 0.9256097145683195  
0.1012713650166177 0.8621504889421575 0.8697036069257280  
0.2092246178334417 0.9410874053325919 0.3701943893364678  
0.2100095229461559 0.3545350629110904 0.3792724624984633  
0.0993188317535005 0.4426874094659273 0.8829493969663981  
0.7065954293862740 0.9489329783368786 0.9403083722886514  
0.6046270944735479 0.8565495593361196 0.4102838333727966  
0.7090913091381431 0.3883535627638897 0.5538682826853695  
0.6362268815053456 0.4052478472541106 0.0582768328559515  
0.1973573127397819 0.9116791687091901 0.7525766053948321  
0.1151057795776563 0.8914210317795612 0.2486077212553495  
0.1190361575369341 0.4068460373787045 0.2554384068464257  
0.192197039767533 0.3921733091646570 0.7602537539822491  
0.6076682060242481 0.9080474548501574 0.0593475710215347  
0.6978139225065541 0.8859878480641298 0.5474383297872641  
0.5173200167973526 0.5327542926780180 0.4952969238530399  
0.8087471571095685 0.2721479932845893 0.0089224472896220  
0.0112748152681140 0.7786491674269402 0.7939366774093348  
0.3024286099539883 0.0228884871137949 0.2952197066054804  
0.3048649722248358 0.2749434245171760 0.3058873032176690  
0.0093577380798041 0.5298660725358337 0.8129647704173063  
0.7978438802568912 0.0252479788827811 0.0275716344072458  
0.5175510879202488 0.7870083656284037 0.5180078180804173  
0.488278550552192 0.4386718295482280 0.3600746222207333  
0.8410880367269414 0.3604001125918562 0.8671307563785215  
0.9760978990426223 0.8660738305900865 0.9357970116970383  
0.3309472631838500 0.9432951698973918 0.4484526276671931  
0.3324566342040227 0.3588994585989920 0.4546176731645359  
0.9744346850208582 0.4399882944038015 0.9519025104260559  
0.8225673526952575 0.9729297242626099 0.8491609726565705  
0.4761369669467153 0.8586829792112621 0.3617745985786461  
0.5363155425353754 0.4425625458115792 0.1730369886207047  
0.7693161296374185 0.3278817758334417 0.7070182928252522  
0.0430973740374390 0.8393434376026653 0.0995798446349576  
0.2758681663482822 0.9759435920927797 0.6233695989755462  
0.2704864716053383 0.3313453683568379 0.6260057166105250  
0.0419180540426676 0.4626530105472317 0.1157634536629822  
0.7704773124763665 0.9604165865721547 0.6674165983116798  
0.5417887905877694 0.8360841200688603 0.1922502564655753  
0.4438570469043808 0.3559160616675617 0.2183934177992745  
0.8318651985167694 0.4465079770626754 0.7127597820598947  
0.9648273051442482 0.9468623523696015 0.0966482718378031  
0.3315190448919139 0.8551628700958120 0.6018110726718694  
0.3361813648790327 0.4469622762425418 0.6075434572596555  
0.9668453945063349 0.3529404049154923 0.1072491997282561  
0.8479687568939297 0.8614911620951898 0.7435924630174058  
0.4646896529418816 0.9461090467879099 0.2119202068834196

0.6048960565540394 0.5356606501045484 0.0825297482078101  
0.7043311916957458 0.2553274765059342 0.5759834917839608  
0.0911713689026692 0.7587162660029405 0.2351608295497821  
0.1987389467257550 0.0467987903027723 0.7414560071934300  
0.2014091643703729 0.2571637528202293 0.7499709116346095  
0.0976797974641019 0.5407531097650289 0.2457512926186189  
0.6718861328553700 0.0175365973126994 0.5680310342070155  
0.5993199696091753 0.7735970008957491 0.0421712359500163  
0.9128563386584304 0.2320317416319021 0.1198090292397316  
0.3920147665209286 0.5691552865356192 0.5871629773922878  
0.4104553478670039 0.0663060497601603 0.1922981865501834  
0.9009128978430984 0.74433347400924418 0.6903729934730434  
0.8963902305230957 0.5633371092838322 0.7157141012640630  
0.4153074834646602 0.2276124325162849 0.2152506425485259  
0.3980958318264647 0.7400688729094528 0.5710910914371121  
0.9097954235939294 0.0664048545038297 0.1182383898552392  
0.7980845330346256 0.2572942638756294 0.2087228830508495  
0.5078041591157308 0.5566771200667584 0.7147947270466697  
0.2978100070335180 0.0517553202552932 0.0986271895366755  
0.0165371489350698 0.7436387010973373 0.5995885835525294  
0.0058067233118893 0.5488322046540250 0.6128335722481003  
0.3054636927120670 0.2531261382565274 0.1081726063253059  
0.4968883658124406 0.7410535893580371 0.7022821313021035  
0.7993696626993020 0.0526907102101647 0.2243458096027706  
0.8100307944007633 0.1508282867325342 0.0871133554604615  
0.4986202498917200 0.6562084232852881 0.5445290252005188  
0.3107917083872971 0.1493983415391197 0.2373717513561696  
0.9924492939672661 0.6524903893141613 0.7418902335763334  
0.7348915783351485 0.2414860762177740 0.3804883592142401  
0.5729203673162880 0.5450726097064215 0.8891609221195912  
0.2276473029233423 0.0295440508897229 0.9338806230669934  
0.0812596338624980 0.7739192282280537 0.4326214981204010  
0.0706130638720630 0.5340558899448795 0.4413414030513719  
0.2329307149118916 0.2654414501124960 0.9426180446787352  
0.5735258268550859 0.7282279405312602 0.8599582580974577  
0.7207710077152805 0.0281337464643148 0.3821691760147310  
0.6653584066783277 0.2447102992961790 0.2106628563178280  
0.6385230266374484 0.5800347009209634 0.7262237476348412  
0.1668082807684814 0.0633424551817715 0.1033317550695462  
0.1491624450022051 0.7413012297161132 0.5965758942408269  
0.1363655068435761 0.5685550141532738 0.6074592904067344  
0.1740927047482921 0.2365198127593887 0.1158573370786514  
0.6282009076742555 0.7625336581970018 0.6848859913308938  
0.6696325209444725 0.0754224751196006 0.2115721078627207  
0.6971985122386359 0.1378225547167726 0.4930943250463857  
0.6261719568922111 0.6485848395041437 0.9973296143855496  
0.1902271476629459 0.1499497491478782 0.8662543485653822  
0.0901387738508498 0.6517789182837335 0.3538169819348932  
0.6100986878405075 0.2343107170315809 0.4375487736515255  
0.6998685193934421 0.5430761006516802 0.9407585985030882  
0.1029136150556145 0.0493186609103227 0.8811803277863702  
0.1948112229955815 0.7342842549702847 0.3500468544092602  
0.1915167036154770 0.5660218205614433 0.3792146022418990  
0.1063741462779115 0.2532128739512542 0.8899393639162340  
0.7003291602367039 0.7457800109422427 0.9170095176118552  
0.5969954242808264 0.0661615203845555 0.4203296530612878  
0.5012199785806132 0.1588846894233709 0.4438077407087329  
0.7858505089150519 0.6453355620856216 0.9533130949806321  
0.0191808076308605 0.1533277140372352 0.8664900362490854  
0.2947504061944458 0.6496841499564099 0.3784663995719042  
0.4974833891227760 0.2781338216788065 0.3573727243700753  
0.8221539447733007 0.5270525350398495 0.8727348025758855  
0.9814855060187893 0.0389249314487023 0.9537225594643777  
0.2995420085506734 0.7749524269980069 0.4513048934015700  
0.3059936510692036 0.5255678811933221 0.4533475662286895  
0.9837799665988790 0.2668465108864396 0.9576871513225528  
0.8251391695741638 0.7527071233612149 0.8517240723412548  
0.4769324445640410 0.0385479244706181 0.3584201361944243  
0.5380025131166210 0.2677491245112177 0.1674972615848916  
0.7679626157416292 0.5643328125418504 0.6991108188853316  
0.0382735440377709 0.0560595277574351 0.1342189534694339  
0.2765646061556935 0.7372617203300642 0.6427513314779247  
0.2655877717100070 0.5576398441553109 0.6388163636139135  
0.0430825151607149 0.2445676797913101 0.1335616680247974  
0.7722155380566286 0.7640738272111395 0.6666441239265458  
0.5412919745396406 0.0517237909575136 0.1834403348333987  
0.5969488765782507 0.1577177754738269 0.0999797214566643  
0.7033448125513335 0.6510810247414024 0.5869514918030774  
0.1090852651833426 0.1491798397897101 0.2295034530736611  
0.1950768830806383 0.6521508685989612 0.7320844951707987  
0.6176269192148597 0.6231187229653444 0.4306571757696949  
0.5354253652826055 0.6979778239286646 0.3322549239041278  
0.714888267702620 0.6878165603143146 0.2900882943718867  
0.4330165105025101 0.6105992844620018 0.3610952735023665  
0.7955160254955382 0.6323539011160629 0.4308205030883495  
0.5464702138727440 0.5670735288598405 0.2872049066285630  
0.8298614763515254 0.4679137641644616 0.1161225087258248  
0.4796750729347299 0.3379607311883830 0.6120313789347392  
0.3327648875851489 0.8254206903100145 0.2021772611353662  
0.9781547188611500 0.9771579111772178 0.6961229793300260  
0.9782636815947447 0.3329138030173743 0.7048086249661907  
0.3294752502413869 0.4746921255686690 0.2102882225346802

0.4844972532913381 0.9754334871105904 0.6011223549392541  
0.8328596246570579 0.8317111333743564 0.0863062205227163  
0.7291953228211412 0.4372073017772756 0.2808263457622511  
0.5821660549414366 0.3745711094561865 0.7635368935981518  
0.2302208985384616 0.8630721276923726 0.0511640469041770  
0.0816875267428845 0.9370365505198250 0.5483305211033332  
0.0811734290721895 0.3664166388519428 0.5540169387995533  
0.2315706311741787 0.4377229475289490 0.0546442555947076  
0.5741074339233023 0.9280633243384931 0.7721820682479382  
0.7302209158444233 0.8700598537398353 0.2405344743442142  
0.6817102240619546 0.4529388556807538 0.4915854895369878  
0.6416649521676812 0.3474560447229365 0.9722463743987877  
0.1777787402418358 0.8529105998039737 0.8321456834176492  
0.1329626603121365 0.9488537407372331 0.3310827252811184  
0.1339863416409144 0.3488166854130923 0.3384195515584065  
0.1747823112263182 0.4517970790451806 0.8397004907551903  
0.6312821461515549 0.9644117352848458 0.9780924460544820  
0.6793240034669514 0.8401962395850084 0.4507123660531425  
0.5286405334979054 0.4541831555485853 0.4629034931860144  
0.7931452685637995 0.3466132082013053 0.9632442359714971  
0.0234301375535390 0.8540617318386567 0.8387137502808962  
0.2878966129661206 0.9495057793758989 0.3456989698811773  
0.2887742743895369 0.3490291009192582 0.3531414534215747  
0.0213090661420247 0.4532317708361993 0.8542838207884481  
0.7858623954615302 0.9598734209001181 0.9563437541246786  
0.5289114393875541 0.8550241838608438 0.4540577176285422  
0.4712725093622001 0.4318563630529209 0.2416249332593704  
0.8348325028624924 0.3670531601694532 0.7448909024951890  
0.9743048470310490 0.8694955428706890 0.0580004086764068  
0.3355501927540898 0.9344653217330604 0.5701735934758557  
0.3344523308727851 0.3675703571822195 0.5768607908991388  
0.9734356558941563 0.4316451787659053 0.0740577504496968  
0.8341082174891118 0.9418799947327324 0.7364220467688805  
0.4744924354445592 0.8668935674844394 0.2396012249823609  
0.6100697002481087 0.4620801866354048 0.1361663656657728  
0.7048521208015688 0.3270259425285890 0.6346406599550148  
0.1055863340410972 0.8279101734733501 0.1728760233605714  
0.2043020267592529 0.9765456659596611 0.6783950864513960  
0.2012894542316110 0.3273145408084214 0.6864131429470868  
0.1080793359740914 0.4714883390940280 0.1823714064459403  
0.6962941428372162 0.9492970375129648 0.6249554586731675  
0.6054925505835503 0.8367696261596775 0.1184593665745572  
0.8325792125898157 0.2285058130999525 0.1064643888519139  
0.3306407207605941 0.0722545786644993 0.2067758503683781  
0.9793507290777383 0.7302530116352407 0.7072752707080059  
0.9760998806505503 0.5733905171878717 0.7215088090622506  
0.3343536508060599 0.2268415704412119 0.2166989334450540  
0.4777071904058793 0.7314345919287842 0.5836780019674302  
0.8297880103398787 0.0733134761924988 0.1139505475363990  
0.7299537418745911 0.2747260517742079 0.2686040840435989  
0.5758832980831837 0.5342066606067545 0.7665195769854602  
0.2285684250316132 0.0212704970451333 0.0559501542388060  
0.0829418905189661 0.7792936309939767 0.5549322144694930  
0.0753671112591674 0.5240984776123923 0.5630009659007846  
0.2343314749839329 0.2784200035835113 0.0636747868655460  
0.5643925454934779 0.7706265680091041 0.7551887395295734  
0.7262909874994667 0.0265678930981430 0.2596181403706954  
0.6860074893194160 0.2175827659896633 0.4714937263294759  
0.6259068155213950 0.5682091316736365 0.9745765308002945  
0.1795050121960927 0.0695333080797234 0.8552580501577444  
0.1148891396922725 0.7292552745480481 0.3433906925812768  
0.1129131194836288 0.5734083284313825 0.3550070042410288  
0.1822802296450181 0.2309660530199745 0.8620544938462266  
0.6253539322080688 0.7247152867422298 0.9525650065074951  
0.6718367753112208 0.0624381472593328 0.4659551789574740  
0.5299961382836271 0.2355292940548308 0.4498191765173988  
0.7772086482324229 0.5643995827469273 0.9583036771735950  
0.0260523823670894 0.0720417147976861 0.8640571639964367  
0.2743925882042919 0.7283114692094343 0.3582667301878550  
0.2709148260345502 0.5712635764791307 0.3669518309549161  
0.0288747334310501 0.2342834416203775 0.8684931335986874  
0.7776256315769626 0.7262718061581331 0.9414676600030210  
0.5188133131961450 0.0787766421949178 0.4446401196982144  
0.4745192541847786 0.2810099827158792 0.2395662056417762  
0.8293103271095393 0.5246493497510465 0.7501659518862387  
0.9743302298367941 0.0270534756639798 0.0751145890485439  
0.3266688994323693 0.7767048804802714 0.5672151500329824  
0.3260789841360135 0.5254832531592154 0.5739811099731397  
0.9771311418614418 0.2737401193763875 0.0798680838217619  
0.8343665267896242 0.7805076002380132 0.7363745828236949  
0.4740466705354223 0.0258741800297121 0.2367449438488207  
0.6074443398009401 0.2365709183840279 0.1264738173069707  
0.6976111676338143 0.5781020560803141 0.6430525851414089  
0.1087434579321429 0.0722612424218292 0.1873485220492493  
0.2021314155010619 0.7283110795533821 0.6877875669382947  
0.1953205713804663 0.5747651259432981 0.6911546092028408  
0.1115592534217038 0.2270876746250844 0.1919862481069453  
0.6084177089872893 0.0799005198346658 0.1316149295021410  
0.5348197528151661 0.6187153602616271 0.3956658500601445  
0.6951334133432464 0.6695094634893718 0.4225749493985228  
0.6822981418979177 0.7065502257648761 0.2433866722488119  
0.4254852709995329 0.5694582723465313 0.3211600438900581

0.4032305488308276 0.6094104983019067 0.4196849303902682  
0.8229603341058362 0.6452995120073165 0.4884062598299688  
0.8183963322871836 0.6458395401274437 0.3690258994725220  
0.5828377239379831 0.5844631399750208 0.2453350935348186  
0.5076874591994569 0.6933441353641986 0.2700655244859839  
0.4651891594758619 0.7241841188688307 0.1022934963231072  
0.4266425304658755 0.6439709961290677 0.1505987982010585  
0.5159453362866607 0.6445854513120334 0.1103583887399621  
0.4702153941373998 0.6718492682147765 0.1258427349923479

Structure TS reaction CH4/16vvv→19v S=8/2

1.0000000000000000  
20.1473007202000005 0.0000000000000000 0.0000000000000000  
0.0000000000000000 19.7681999206999990 0.0000000000000000  
0.0000000000000000 0.0000000000000000 13.2308998108000004

Al O Si Fe H C  
2 198 94 2 10 1

Selective dynamics

Direct

0.4792806363963109 0.5761228595181791 0.5937523559569868 F F F  
0.6977716237941394 0.7380077099825826 0.6203304749764840 F F F  
0.9109006232718144 0.4720479097012600 0.1215625008975252 F F F  
0.4003960867581995 0.3307126288533908 0.6203787295018586 F F F  
0.4133413200643759 0.8239913122036810 0.1937859227469900 F F F  
0.8982569332715968 0.9780041988618322 0.6843324498162886 F F F  
0.8987435407581117 0.3295223976451851 0.6933716182526553 F F F  
0.4107354267052443 0.4844029092939266 0.2135201365649522 F F F  
0.4055690903773694 0.9638384096922508 0.6108343189269263 F F F  
0.9129872098892733 0.8238025028327627 0.0988825328606211 F F F  
0.7988738419163681 0.4620737849833887 0.2280448337401992 F F F  
0.5105330036211768 0.3473929147967141 0.7253581863416301 F F F  
0.3016398468904171 0.8330123815756565 0.0901208956547563 F F F  
0.0136145191136450 0.9739473316822540 0.5857880620570839 F F F  
0.0103228562917224 0.3365985113844800 0.5917804382704333 F F F  
0.3033314214568676 0.4662471606896190 0.0941727592495312 F F F  
0.5174534375482551 0.9714444352823151 0.7132031166871968 F F F  
0.8031903535725959 0.8498585208449967 0.1976735053542740 F F F  
0.8029721959312894 0.5384685523423158 0.0661600710090298 F F F  
0.5113857892469795 0.2734055424237170 0.5557514562609995 F F F  
0.3083467978589880 0.7548054861251572 0.2548897709157032 F F F  
0.0007236196388263 0.0456835073952320 0.7555244946396229 F F F  
0.0061912538108118 0.2650069411173561 0.7609414672591015 F F F  
0.2971125118718021 0.5430342565909427 0.2580891410700374 F F F  
0.4983701813912518 0.0505412404006336 0.5555637381193534 F F F  
0.8007336274949353 0.7604146942889116 0.0489539884264332 F F F  
0.8069653788406370 0.4032919352965010 0.0496583964369108 F F F  
0.4972970222562552 0.4089853822060334 0.5510718957922833 F F F  
0.3102699144731460 0.8896458328551375 0.2704535531686005 F F F  
0.0033146751262549 0.9109397412014459 0.7571724857615152 F F F  
0.9999439681566358 0.4000784592166085 0.7663030924540166 F F F  
0.3077689939922266 0.4086301103918686 0.2739494897304908 F F F  
0.5202462609308967 0.9201765956276589 0.5286768145945757 F F F  
0.8162898613491905 0.8911641495464551 0.0068479591467607 F F F  
0.7316690280405282 0.4636305447255324 0.3958587569162049 F F F  
0.5873452015804617 0.3609983977924216 0.8849676220932992 F F F  
0.2268233464319636 0.8565816946702256 0.9301731072612327 F F F  
0.0833004982600087 0.9403157389983647 0.4267620141794382 F F F  
0.0837293344044454 0.3593004863535683 0.4322865334260158 F F F  
0.2266928549358909 0.4481723120967018 0.9335446034974808 F F F  
0.5810806631082670 0.9613884814109142 0.8832531817901099 F F F  
0.7321812749493120 0.8557507545103675 0.3613172050466247 F F F  
0.7225607763648938 0.3560934787255974 0.2749393506287632 F F F  
0.5927812725398311 0.4551744057108777 0.7418725741160870 F F F  
0.2219532575869607 0.9414867949741250 0.0867445077784623 F F F  
0.0841229238001020 0.8584157841960902 0.5871357888337698 F F F  
0.0890766152707698 0.4451547121352775 0.5880606904279091 F F F  
0.2234414298334926 0.3588272041025107 0.0859293721115364 F F F  
0.5507036767855098 0.8497851528300657 0.7811911856518137 F F F  
0.7150484111741875 0.9497237794267335 0.2190242233213482 F F F  
0.6646210696301580 0.4705221903129129 0.2260349518316573 F F F  
0.6388817154699851 0.3326920848136439 0.7046114718546619 F F F  
0.1720591118824970 0.8184694913238744 0.1055906912597919 F F F  
0.1460133733878948 0.9754978936521752 0.5950329614955550 F F F  
0.1411197586017181 0.3239646040712287 0.6057364447631386 F F F  
0.1725940420033183 0.4807092581113253 0.1104428217436251 F F F  
0.6455872678050270 0.9328238297069404 0.7160298763822937 F F F  
0.6732969529692028 0.8257085989657966 0.1856298355705235 F F F  
0.6807785764423571 0.5208596341301686 0.5567721036272388 F F F  
0.6286832921695904 0.2746661086078319 0.02320581120955472 F F F  
0.1866606569999973 0.7794123809632865 0.7808540534889801 F F F  
0.1220291577813910 0.0236054064658191 0.2838739496443736 F F F  
0.1208776942651753 0.2748839814764352 0.2900633464481643 F F F  
0.1816902106997560 0.5248062891946503 0.7849943995616186 F F F  
0.6264906177295231 0.0383541294670025 0.0292779041532540 F F F  
0.6890934159723088 0.7624122105604130 0.4898318575931881 F F F  
0.6073650538046280 0.4351800109055475 0.4479482720381185 F F F  
0.7163066565121099 0.3509316094561186 0.9258719815332697 F F F  
0.1014313259704949 0.8631561039844016 0.8704255522699924 F F F  
0.2093460329086696 0.9413928560787710 0.3706652576752418 F F F  
0.2101660191393577 0.3546423621471959 0.3790900900146283 F F F  
0.09938753427110808 0.4422976251982078 0.8821421733424231 F F F  
0.7068034409596748 0.9492244125876255 0.9398750409194605 F F F

0.6052115970263117 0.8564124263720672 0.4111434953536701 F F F  
0.7089320956620568 0.3897251508106621 0.5564355229712135 F F F  
0.6365940091241455 0.4062210960433035 0.0585063015766423 F F F  
0.1981766881306442 0.9114845061259658 0.7534175486695034 F F F  
0.1151633012641895 0.8918846658735262 0.2488732949457813 F F F  
0.1191401495417921 0.4071275049978240 0.2556653416678785 F F F  
0.1929395451786675 0.3919217570653757 0.7605592138056920 F F F  
0.6085839621844116 0.9081462522838777 0.0603212902717019 F F F  
0.6983198556225432 0.8862456516541286 0.5483856510580409 F F F  
0.5208733287950267 0.5339979640141408 0.4926081179262169 F F F  
0.8084326706539855 0.2723540261295341 0.0093441982918776 F F F  
0.0118949115403240 0.7788718895141358 0.7955749062017787 F F F  
0.3026990239820506 0.0229403186547259 0.2955072730108697 F F F  
0.3051555575276979 0.2749885056336723 0.3064404203055829 F F F  
0.0091233691552475 0.5295877803117648 0.8141455913424167 F F F  
0.7985345818774761 0.0244476747180613 0.0281930283347123 F F F  
0.5173170075037632 0.7871854538431506 0.5169677610429844 F F F  
0.4875806622936807 0.4388483362085864 0.3604272678891718 F F F  
0.8411654588630171 0.3603421778495175 0.8673576550496023 F F F  
0.9760705831910315 0.8670181483274106 0.9361439592717815 F F F  
0.3309818608693718 0.9435500469615832 0.4490824567341534 F F F  
0.3323980787598657 0.3594256492367691 0.4548462398527278 F F F  
0.9742812658944402 0.4386221877948060 0.9512842369753898 F F F  
0.8231829761513794 0.9723271651762389 0.8496883886902182 F F F  
0.4765048800950993 0.8602272887628786 0.3625215270982594 F F F  
0.5368710234757330 0.4425410925081508 0.1737439844265225 F F F  
0.7696426833595709 0.3276221072838155 0.7072071897871766 F F F  
0.0433950283068256 0.8402027626132735 0.0993609287658757 F F F  
0.2762014259540848 0.9764788825345718 0.62420274711293881 F F F  
0.2709422313037990 0.3306538315926844 0.6263922763646832 F F F  
0.0424576883972421 0.4610703324400447 0.1139632258127889 F F F  
0.7703754974423589 0.9616492316421841 0.6680656578664426 F F F  
0.5421976859244282 0.8369162324828636 0.1932117604595760 F F F  
0.4442546456209939 0.3560507035405891 0.2180692221858678 F F F  
0.8332246269962127 0.4457828603745426 0.7120847033863882 F F F  
0.9641731565886289 0.9470733703918555 0.0976119427173430 F F F  
0.3306754155439435 0.8553885132471422 0.6024699834201215 F F F  
0.3351941302552390 0.4471231049455682 0.6083636045307799 F F F  
0.9657066138234143 0.3524894285107436 0.1077055712897277 F F F  
0.8472431879774405 0.8616224913410662 0.7416668734358254 F F F  
0.4645166606494229 0.9464710058664636 0.2120879700960785 F F F  
0.6038421193121195 0.5362604346761799 0.0819764416985649 F F F  
0.7038186286166450 0.2561188456276540 0.5759165662568080 F F F  
0.0900907362013541 0.7592911184148576 0.2355502382145147 F F F  
0.1983802184146484 0.0466332290192852 0.7420004336906771 F F F  
0.2011086182255255 0.2569126973414271 0.7500742818036414 F F F  
0.0951341050240941 0.5405443529964344 0.2448706601922694 F F F  
0.6718730270966162 0.0179545267498256 0.5678941940555902 F F F  
0.5991196558653158 0.7738794166332710 0.0431953519785324 F F F  
0.9127872563237318 0.2312054726477157 0.1190383902398935 F F F  
0.3942330607977595 0.5672963211385209 0.5809498385409526 F F F  
0.4104937276136909 0.0666578139387042 0.1922224417624605 F F F  
0.9014813419634038 0.7444598557831839 0.6922654584674035 F F F  
0.8971780339584896 0.5630728877805211 0.7145387817567084 F F F  
0.4152775607762962 0.2277830870985866 0.2150646300200805 F F F  
0.3978908700420050 0.7406962468637843 0.5734706490153769 F F F  
0.9099072036205769 0.0669924370523418 0.1189259601071697 F F F  
0.7983751425082914 0.2565126883164623 0.2089844872733551 F F F  
0.5096681731453998 0.5582654618004526 0.7118586079871179 F F F  
0.2978009490958158 0.0516272733111833 0.0989137800076634 F F F  
0.0168781515598795 0.7429066048398596 0.6014763890433414 F F F  
0.0080397667735213 0.5504601124340951 0.6144435111372459 F F F  
0.3053218984324531 0.2536557255276861 0.1086242148969490 F F F  
0.4982855346305470 0.7389958506603010 0.7007423376427937 F F F  
0.7993330081702652 0.05322493335378481 0.2246066545107226 F F F  
0.8096741214290972 0.1505557717959576 0.0860746378845505 F F F  
0.4974889790033643 0.6568980043146553 0.5393736874568802 F F F  
0.3107255435484149 0.1495264422364926 0.2372436613897548 F F F  
0.9924529442974830 0.6526349873704049 0.7449879510296569 F F F  
0.7349052707800539 0.2429870622352581 0.3809453028711687 F F F  
0.5728143794988938 0.5465222596957773 0.8882325306992556 F F F  
0.2276147562320006 0.0291550777099587 0.9343025925047996 F F F  
0.0798014187100335 0.7732464877433500 0.4332589855425582 F F F  
0.0699018096119275 0.5345991493093436 0.4412189729322833 F F F  
0.2332953262158881 0.2656920765577482 0.9425255595610054 F F F  
0.5738243026929553 0.7291491993925518 0.8602747498924757 F F F  
0.7204911161351149 0.0284498899057937 0.3820135316606539 F F F  
0.665654790761361 0.2442434253429084 0.2109543936142657 F F F  
0.6406158793723051 0.5794675370885685 0.7267113197110930 F F F  
0.1668309870739932 0.0629374611790112 0.1038331532014425 F F F  
0.1493832592366644 0.7416191794944496 0.5961595879959489 F F F  
0.1394031476601896 0.5673232549506864 0.6043912098776048 F F F  
0.1739613150434707 0.2366768522985367 0.1153049411892368 F F F  
0.6290342335829564 0.7624234878167968 0.6852457658117501 F F F  
0.6695649165553093 0.0752591504397415 0.2110882296336953 F F F  
0.6975396637484650 0.1384026105919176 0.4925856934337247 F F F  
0.6263789860762614 0.6492108714831772 0.9973796454833774 F F F  
0.1908552231936369 0.1498127124220261 0.8668777967084722 F F F  
0.0915559958741028 0.6518477811917904 0.3530483531681270 F F F  
0.6100313889651048 0.2344651953791299 0.4371330608398409 F F F  
0.6996141680754064 0.5431864265785507 0.9412208840824263 F F F  
0.1029409630938289 0.0496558791540878 0.8822043941602402 F F F

0.1942278243150142 0.7376238712132803 0.3501305076238097 F F F  
0.1906818188587565 0.5630148105568225 0.3760399527459484 F F F  
0.1066680875331087 0.2527166749475143 0.8910257771800190 F F F  
0.7005185173585389 0.7468128911980543 0.9182487295905162 F F F  
0.5968487869646921 0.0670063481347327 0.4208461718551746 F F F  
0.5009933048176975 0.1595251692196058 0.4455050572664874 F F F  
0.7855542829835329 0.6456309975590671 0.9514946899373840 F F F  
0.0189024255909089 0.1533150798258944 0.8671968688996969 F F F  
0.2911773282632879 0.6497500610082056 0.3787348265157604 F F F  
0.4972203155791064 0.2783037618159199 0.3574459153233462 F F F  
0.8210114399211932 0.5275711333761635 0.8699099700580888 F F F  
0.9815144861234586 0.0388759893940929 0.9545338915736181 F F F  
0.2996164529495289 0.7745978869420611 0.4523299791079651 F F F  
0.3041463164498950 0.5255165572372178 0.4541798240940267 F F F  
0.9838901069932788 0.2671687326326548 0.9575725429597526 F F F  
0.8255865593629892 0.7542350851879576 0.8535419675573834 F F F  
0.4770116555304611 0.0394200087159930 0.3582834202878828 F F F  
0.5381725649086917 0.2674066861230813 0.1679934958667815 F F F  
0.7692337979383126 0.5628533003107066 0.6926756610994573 F F F  
0.0383165353360155 0.0558456778926981 0.1350226554286067 F F F  
0.2763432064013358 0.7373737880354341 0.6440957306315482 F F F  
0.2685564934992399 0.5597882820480748 0.6417690896944706 F F F  
0.0429424924586783 0.2446665867476270 0.1335751680819541 F F F  
0.7728726027708817 0.7617270517855488 0.6682637271207525 F F F  
0.5412411660205194 0.0519689654779754 0.1830640780920305 F F F  
0.5972767109095187 0.1577618484566585 0.0992890383708840 F F F  
0.7021876205556410 0.6508689105429895 0.5849154229739923 F F F  
0.1092071203576168 0.1493335242977381 0.2292891322382857 F F F  
0.1941227450920522 0.6521450856212283 0.7319903585441949 F F F  
0.6146740758083522 0.6346019135876643 0.4198905840836689 T T T  
0.5237663678481733 0.6945976831667324 0.3175900958001839 T T T  
0.7184450046255435 0.6880772411543887 0.2943827548138316 F F F  
0.4278967072390003 0.6057481741489070 0.3670664701539010 F F F  
0.7963711053274309 0.6312252100753284 0.4331801208436588 F F F  
0.5436963237135470 0.5657419422032172 0.2855464331450290 T T T  
0.8303349913396971 0.4684604837384470 0.1153961939251218 F F F  
0.4801505763185574 0.3395797336685931 0.6118330270576493 F F F  
0.3330370107469278 0.8253009707329610 0.2031263803360446 F F F  
0.9782570584733037 0.9772802033943861 0.6964646582424255 F F F  
0.9786850998862562 0.3324380288454662 0.7046450822407166 F F F  
0.3297191826937578 0.4746914249378875 0.2100105391343519 F F F  
0.4846762481019553 0.9756205087180447 0.6016915748102818 F F F  
0.8330192286062967 0.8312933652700210 0.0870383342359844 F F F  
0.7296826806937631 0.4374983792605818 0.2797157565182786 F F F  
0.5823126088283601 0.3750817841745757 0.7643924835157776 F F F  
0.2304062212650706 0.8626709704097806 0.0519702820219194 F F F  
0.0817301690945840 0.9369012689034193 0.5488127384203878 F F F  
0.0813068048819900 0.3663968005903584 0.5538664581624815 F F F  
0.2313653721266107 0.4381248175456278 0.0548156658002270 F F F  
0.5739848835018933 0.9279810084430267 0.7719420958097913 F F F  
0.7307160771180108 0.8701537463227709 0.2410803032848392 F F F  
0.6814569788931308 0.4525190546209217 0.4904645264060505 F F F  
0.6417120963488685 0.3481189231428772 0.9729371820209280 F F F  
0.1778456748119979 0.8529119064976172 0.8329098727720421 F F F  
0.1330812089714826 0.9491188158516977 0.3316333180800868 F F F  
0.1341599819925037 0.3489149034442391 0.3382841041829181 F F F  
0.1749272203154817 0.4517294323207324 0.8393554419186628 F F F  
0.6314972582652558 0.9641408470668154 0.9782100370544526 F F F  
0.6800868679755894 0.8405171505753870 0.4513456344975495 F F F  
0.5294062168632507 0.4547828431347725 0.4617927621367528 F F F  
0.7931230013897164 0.3468169691789029 0.9634664146163558 F F F  
0.0236328487683508 0.8545895914843555 0.8394656915093179 F F F  
0.2880378354675486 0.9496116134836612 0.3461920000257308 F F F  
0.2889519150714221 0.3492020681755648 0.3532131836380614 F F F  
0.0212698172195331 0.4526854059824430 0.8540644697156807 F F F  
0.7861108024630923 0.9593514385747000 0.9566113360530366 F F F  
0.5293818126882783 0.8556634036029038 0.4544198566769708 F F F  
0.4714897088555219 0.4320297683111747 0.2415936650480717 F F F  
0.8353785362725290 0.3664426310484643 0.7450269452303857 F F F  
0.9742572239761316 0.8698996124507232 0.0584008210967397 F F F  
0.3355230005476670 0.9345807943801034 0.5707725659974727 F F F  
0.3343964634944001 0.3677755049277351 0.5771038912037625 F F F  
0.9733373404097847 0.4309068710487125 0.0735330135308274 F F F  
0.8341025859037785 0.9421728568429302 0.7363089409509485 F F F  
0.4746996000136079 0.8672982745609943 0.2402277558539581 F F F  
0.6103131915909330 0.4629542346184650 0.1365896517576601 F F F  
0.7048144959333627 0.3273807384511542 0.6356078904932261 F F F  
0.1054875931355141 0.8283001111119219 0.1732919586799397 F F F  
0.2045767337027939 0.9763721962314094 0.6791093683851415 F F F  
0.2015734986674147 0.3270809541446695 0.6865407091413047 F F F  
0.1077175850689827 0.4713761123099189 0.1820373017192765 F F F  
0.6963493746774887 0.9498927045036254 0.6252756418191794 F F F  
0.6059536337729128 0.8369726763745362 0.1196920137389554 F F F  
0.8324593925018249 0.2280952498188711 0.1061510247157145 F F F  
0.3306955915117484 0.0723300497067143 0.2069272216125526 F F F  
0.9798199786077646 0.7302726485872313 0.7093741298542611 F F F  
0.9767942596518679 0.5736597063693907 0.7226203971668497 F F F  
0.3343421106308142 0.2269957575113608 0.2168686509321702 F F F  
0.4775250647814389 0.7314982271065915 0.5823381755937831 F F F  
0.8298526589286155 0.0732842050499158 0.1140788721128985 F F F  
0.7301944746381110 0.2748701494796109 0.2681313330813353 F F F  
0.5767365046666200 0.5348918623942325 0.7658252792760081 F F F

0.2286135481813076 0.0209378348820266 0.0563799769483708 F F F  
0.0825898119306672 0.7790518098425565 0.5554344963880311 F F F  
0.0764496470479372 0.5243822900339694 0.5626425360498146 F F F  
0.2342672499404443 0.2787551821386529 0.0636096062303579 F F F  
0.5647158205580993 0.7703548227184882 0.7544108246601469 F F F  
0.7263114761398839 0.0266791605573218 0.2594942513534733 F F F  
0.6859581016194269 0.2181974639357378 0.4713558837982248 F F F  
0.6257375120615407 0.5688866589454307 0.9743337416071540 F F F  
0.1795627924899179 0.0694512430132264 0.8559152208315410 F F F  
0.1145381354051196 0.7299061215826370 0.3435069591435536 F F F  
0.1122210098569099 0.5729353171082536 0.3538047895593834 F F F  
0.1825504236083191 0.2308036603082257 0.8624473760856688 F F F  
0.6254683725579042 0.7255702515423366 0.9531775207066531 F F F  
0.6718255336483026 0.0629829365999584 0.4659084165941394 F F F  
0.5299850497741403 0.2361526910698686 0.4500869225542345 F F F  
0.7770934709594712 0.5646927567108975 0.9568755708246073 F F F  
0.0260230549307607 0.0720428588768769 0.8648943939409435 F F F  
0.2736351265034358 0.7288309509352260 0.3588413636244852 F F F  
0.2700266488132073 0.5709140779206905 0.3664310721985089 F F F  
0.0291698933174018 0.2341813113248890 0.8689535982353291 F F F  
0.7777542401424142 0.7268010302296517 0.9422586006099891 F F F  
0.5186192687824018 0.0793738602922218 0.4450930306704564 F F F  
0.4745514225289966 0.2810657534888392 0.2395493247888254 F F F  
0.8299082288657758 0.5242250960730246 0.7477323232504460 F F F  
0.9742190364606458 0.0271955478197086 0.0759520305866275 F F F  
0.3263198841974955 0.7768270145558773 0.5683036909249211 F F F  
0.3264661603803063 0.5255245945892142 0.5736845645616242 F F F  
0.9768661049093126 0.2734712979743392 0.0797851468489483 F F F  
0.8346806242080191 0.7804522130775027 0.7373671153239769 F F F  
0.4740718324663717 0.0262065899351214 0.2366886658742331 F F F  
0.6076284701962251 0.2365052514007573 0.1266771196063985 F F F  
0.6978067253038702 0.5775016832936757 0.6406721598687355 F F F  
0.1088272808951629 0.0722423228438203 0.1878447993888770 F F F  
0.2016935887179159 0.7284247242061568 0.6881955502694197 F F F  
0.1965935401873509 0.5748661457155890 0.6907435680113494 F F F  
0.1115528404935375 0.2272089078720327 0.1916825897796670 F F F  
0.6084164527409115 0.0798735533229475 0.1310653235785963 F F F  
0.5302244081247404 0.6208579425987522 0.3898458635703657 T T T  
0.6956329520822964 0.6687119816436889 0.4253958310027777 T T T  
0.6836341824167321 0.6967730081421249 0.2449252477761613 T T T  
0.4226929687191756 0.5661624851142264 0.3229734598720881 F F F  
0.4042465754399203 0.5964273939799085 0.4307574783409081 F F F  
0.8245123660981761 0.6433258783753502 0.4903172006634620 F F F  
0.8190871773651551 0.6438210311689758 0.3708041312226982 F F F  
0.5655896730501833 0.5892192786468471 0.2293433546717557 T T T  
0.5014990452716452 0.6848740061068491 0.2434228121058300 T T T  
0.4695149263755881 0.7223463821161599 0.1081382969481341 T T T  
0.4247475070595433 0.6480239818074797 0.1606808084305341 T T T  
0.5080547633014237 0.6371737189210820 0.1029672820267712 T T T  
0.4715527678601906 0.6708430322377238 0.1371794176144081 T T T

Structure CH4/22 S=8/2

1.0000000000000000  
20.1473052208877697 0.0000000000000000 0.0000000000000000  
0.0000000000000000 19.7681594983396742 0.0000000000000000  
0.0000000000000000 0.0000000000000000 13.2309279702280254

Al C Fe H O Si  
2 1 2 10 198 94

Direct

0.2759000534085322 0.5699178364037056 0.7839504944847825  
0.4953014927798655 0.7300886569424433 0.8172010848897976  
0.4340773095182755 0.6630896503416750 0.3675111926516346  
0.3420118980537356 0.6257031031973392 0.5995202994205787  
0.4711216568566354 0.6754308671850051 0.6090573876682254  
0.2000369358603812 0.6447756582287963 0.6260698041949945  
0.2119903351497102 0.6602680923575339 0.5111976970683068  
0.5992264815091682 0.6509838628627920 0.6926190921318501  
0.5972444313787567 0.6595271540006973 0.5748092919632738  
0.2820031011747665 0.5699135184339649 0.4279410624548539  
0.3527903228616137 0.5999537356101537 0.3974235992393817  
0.4480107220726048 0.6170264707923091 0.4081812688764584  
0.4785905625808710 0.6831962328308084 0.3310803024170413  
0.4152345692310904 0.7011360161632765 0.4197803450042398  
0.3964782638122042 0.6535617050948181 0.3102685953303801  
0.7063404753415257 0.4749319761205808 0.3134802030351098  
0.1954688474551184 0.3277395169570881 0.8106312585473056  
0.2068542901171385 0.8213551254775219 0.3952958441448707  
0.6949506967562790 0.9708708397573810 0.8828693267332512  
0.6949605893927203 0.3254161666484727 0.8866931420648042  
0.2081048414921928 0.4849625925732178 0.3979607725751334  
0.2008483147085851 0.9716572189539763 0.8090485872330677  
0.7036564481077238 0.8189647378473187 0.2977732925345239  
0.5928108034075088 0.4681964055918201 0.4134289548189342  
0.3069368504425434 0.3387708179815633 0.9101339776405948  
0.0928217462135603 0.8279681280605811 0.2972653605817275  
0.8121486379615516 0.9737961838850574 0.7929219483392074  
0.8079719092003509 0.3322352855517795 0.7889188876546014  
0.0965323132393610 0.4689537130955861 0.2927363650635164  
0.3165409429942355 0.9874799483284269 0.8990412280652418  
0.5940067011107675 0.8327030660835134 0.4010561986561915  
0.6012257194252425 0.5416713096258725 0.2456488450829791  
0.3038099216134428 0.2724347638376997 0.7349466391279195

0.1049149505420718 0.7542159029001694 0.4661661134136064  
0.7913577176672141 0.0414749722176552 0.9643866745032251  
0.8022325256080980 0.2613248087304123 0.9591209768992928  
0.0983000014224781 0.5437295333429778 0.4609594180287686  
0.2906493041758206 0.0546957662555728 0.7329826247730736  
0.5922421469998429 0.7553199278024498 0.2396200466608201  
0.6035552974410228 0.4069434224860629 0.2375265771234878  
0.2906888523061641 0.4081068929413169 0.7404113498200992  
0.1060172647259318 0.8898105095404952 0.4724813180992139  
0.7994634663818280 0.9064421064138453 0.9605669785760276  
0.7950886842306509 0.3964131318243124 0.9615806554155578  
0.1097697835724417 0.4088220665268899 0.4702090697740061  
0.3102714763168989 0.9224922046624660 0.7210045404309747  
0.6039531466959376 0.8889761327055108 0.2181665603883557  
0.5247971993622630 0.4501738667253347 0.5796079973070075  
0.3814851376148358 0.3508052555343913 0.0723043621626336  
0.0219444901151156 0.8544381686343062 0.1347703242623484  
0.8778890727312395 0.9391849603380189 0.6304377073641209  
0.8800802029593446 0.3615249097952195 0.6301984920597343  
0.0192172640272064 0.4462819875492408 0.1344846539881510  
0.3710360288051874 0.9468004814712051 0.0731027059927324  
0.5273472143647505 0.8639388265996130 0.5642407199999614  
0.5183462730193564 0.3566884586050312 0.4338799065607137  
0.3937536931493975 0.4410405727988475 0.9234704401947084  
0.0175073516944789 0.9394049443453268 0.2916497123127759  
0.8802625396498748 0.8572756564505898 0.7910090655924606  
0.8821190233187389 0.4443755615848048 0.7903300976966979  
0.0200409515803772 0.3588454498405956 0.2894853945301361  
0.3440187242331453 0.8603112611841860 0.9248621397290555  
0.5243942456264474 0.9456750535372160 0.4026552027202014  
0.4610243391353709 0.4745425200729768 0.4064913270748098  
0.4353455323816352 0.3165364359829826 0.8953921358179417  
0.9626012385629436 0.8183256888387257 0.3071177485341809  
0.9443978606311196 0.9733072626895924 0.7957311926649175  
0.9389286272197190 0.3248964061401418 0.8009745412842001  
0.9670767062421717 0.4804086663350950 0.3128315121804417  
0.4434926639682852 0.9500655995535615 0.9103213602313948  
0.4615338874953081 0.8302174601854745 0.3974551253955162  
0.4759923300489471 0.5125203579256482 0.7415197800026180  
0.4321342165671562 0.2752623361050366 0.2172874479910903  
0.9775368178890050 0.7764970361820676 0.9884962443033153  
0.919452536438918 0.0244439367126652 0.4903663731324542  
0.9145019758643715 0.2730868579674031 0.4907172457758822  
0.9775402979857571 0.5249810102155842 0.9862861009745062  
0.4164299982399406 0.0338413233077573 0.2053772458376230  
0.4959595816808383 0.7653316528600725 0.6929593975267785  
0.3996829274507302 0.4307596373986046 0.6311159236076931  
0.5103170577563692 0.3585053735534842 0.1154911950053430  
0.8953640828002380 0.8619123503809445 0.0818595033989860  
0.0035137811482023 0.9372620025934910 0.5731541801191303  
0.0042377092676589 0.3594951522144603 0.5645113581961494  
0.8930518446808992 0.4411621184154619 0.0779954526859231  
0.4989288742141058 0.9419073878402358 0.1270644653760238  
0.4031060592415587 0.8552975076695075 0.6257112363475550  
0.4970670986843761 0.3812244702936073 0.7440918069604021  
0.4218536637590084 0.4074770061848513 0.2428810125434727  
0.9885116978523092 0.9085355122332402 0.9588976439172647  
0.9071643311266985 0.8938164827763713 0.4495601393750787  
0.9058192285930863 0.4037823226554191 0.4474808971528636  
0.9881192418621635 0.3922628850914432 0.9586280227392322  
0.4037029519110050 0.9059110454808375 0.2561341020735222  
0.4989904182652282 0.8905792379693906 0.7536102144383632  
0.3159764560468846 0.5325343528054778 0.6756919282636690  
0.6019836869311492 0.2768882256420336 0.1943998292601098  
0.8082748043325002 0.7758230834225964 0.0059765353003679  
0.0942267036343020 0.0225571431422435 0.4996012549175246  
0.1001485692072897 0.2761382162120726 0.5032524731575810  
0.8010041783868259 0.5262561569554897 0.0105027411575790  
0.5895304927902176 0.0228865225391938 0.2078800757872208  
0.3028848312745722 0.7880400081136378 0.7138906283863595  
0.2793380801273144 0.4363986930496821 0.5482352146745957  
0.6350323055278616 0.3651502400216306 0.0538496741825447  
0.7687259180788412 0.8670284615915517 0.1406877032395586  
0.1254704416973861 0.9419013875212037 0.6511846633771521  
0.1226844145086803 0.3604352034899075 0.6527686204351774  
0.7675168270484256 0.4339815897452798 0.1455634401147476  
0.6196265435629393 0.9526615831865836 0.0455123824382587  
0.2804319569736446 0.8591311592539177 0.5516338803548898  
0.3331952926429323 0.4571931798525754 0.3697244539257666  
0.565518778550866 0.326331117466485 0.8950612402533383  
0.8331801107586390 0.8377605389105112 0.3064092663888675  
0.0730426462188015 0.9627422696981939 0.8310690655252876  
0.0676053551683998 0.3292029428023628 0.8287994580139020  
0.8371490489106718 0.4640779524168551 0.3033472440523208  
0.5674942105979729 0.9767370684227650 0.8643514499015108  
0.3328025335445440 0.8264474845234195 0.3730719266111318  
0.2475007084660183 0.3563848374846826 0.3930687466236732  
0.6297675072354626 0.4436484523360127 0.8904485842546331  
0.7528096510397170 0.9439401527328481 0.3040217720384387  
0.1451905535982923 0.8516391650056129 0.7986220967180162  
0.1321202325891176 0.4454973920678624 0.8084202259216746  
0.7610689590264144 0.3539591245031980 0.3088183259682789



0.6250248722394232 0.8580431803287061 0.9015701925413796  
0.2653136226220214 0.9425079850483936 0.3972672113583461  
0.3995892862047808 0.5406269157198206 0.2610669698496116  
0.5060412294741172 0.2484362435461275 0.7644295090620574  
0.8851788222714155 0.7600512770906562 0.4418831404706664  
0.9998334263824236 0.0429450434971380 0.9417347689547947  
0.9941216953939987 0.2569816135537155 0.9486571504728060  
0.8862618987025406 0.5387001307189898 0.4441014804062098  
0.4709663998146304 0.0237214027697559 0.7501791219741076  
0.4118530679598231 0.7710166979210479 0.2387973763119515  
0.7050460258451193 0.2329175853222336 0.3053435243778565  
0.1910913444838754 0.5648811758975457 0.7722938542076823  
0.1967927774047221 0.0561749935559691 0.3791320438867875  
0.7022394999005763 0.7504443945568047 0.8891988986472550  
0.6939148225147983 0.5602416864248592 0.8995355549819756  
0.2094657357156068 0.2301410043752048 0.4078288020709245  
0.1929557118447529 0.7266648106160737 0.7754303789103382  
0.6996179133815144 0.0655852494363476 0.3027663263736126  
0.5884463948713292 0.2477340767468106 0.3907828981397742  
0.3079960716897688 0.5424356522656073 0.8963921896778160  
0.0771570706248337 0.0584784611881062 0.3063955728338849  
0.8213465264025679 0.7379467207863234 0.8130965074351210  
0.8111902392945425 0.5570055987612429 0.8148557505812730  
0.0963164203742340 0.2489881868078196 0.3072914240148510  
0.2967733479173817 0.7383852475039422 0.8991537924079418  
0.5855811748217249 0.0634042920681125 0.4005617999436927  
0.6056906067633904 0.1514602482690545 0.2524202985056911  
0.3011595800594019 0.6530169099729050 0.7455620750587016  
0.1094875396920082 0.1491883099413443 0.4441261449459844  
0.7829245779148657 0.6513356337799974 0.9530924944743554  
0.5305727761714802 0.2564456072917256 0.5682861074345539  
0.3707376522068960 0.5289490020580732 0.0720797766246864  
0.0172178334098223 0.0245820279460049 0.1365693026785319  
0.8766969944198927 0.7708799545385109 0.6393294034238906  
0.8703283782091997 0.5318337709303889 0.6410933090624349  
0.0245302864860278 0.2689874225519957 0.1416115631311890  
0.3697359706256794 0.7649122755253865 0.0580024854593690  
0.5150021049048724 0.0249941526177453 0.5618799708609400  
0.4557019937659278 0.2403269925200380 0.4072965432754673  
0.4394610359741579 0.5652098081560847 0.9162706529681475  
0.9456660325293165 0.0526221947900553 0.2975974483645695  
0.9530032211738219 0.7447082416662862 0.7963395989170398  
0.9431816583945490 0.5629819234499301 0.8002563631488443  
0.9645027763442880 0.2382184693829275 0.3126310101868252  
0.4285226209738972 0.7617539825829387 0.8803627784565762  
0.453657770578075 0.0594372557999436 0.3943477702339227  
0.4997172355817511 0.1395927756245349 0.6576960090272778  
0.4021626349882977 0.6505868824363377 0.1448653731671641  
0.0021919311915472 0.1485949732033298 0.0634726285388316  
0.8832496339314488 0.6504339558437139 0.5531819797546084  
0.4079232498092623 0.235325530100313 0.6294639189199926  
0.4960432358275789 0.5560721601882845 0.1274929521300292  
0.8999927332888668 0.0640704171550142 0.0695033267890159  
0.9894153358404566 0.7310038796179066 0.5543754254862209  
0.9868835661714521 0.5674842032310381 0.5624147782172320  
0.9017253351963425 0.2356277605116061 0.0875632675315767  
0.4986911549463376 0.7370417241288202 0.0978069859752592  
0.3933246088471741 0.0689273092155790 0.6051501951935876  
0.2976269778744452 0.1615459312043149 0.6180643995800961  
0.5948354383925853 0.6466974209810731 0.1233228931559691  
0.7990872869007676 0.1514787923014266 0.0748405447106294  
0.0917140220694188 0.6478180119907958 0.5847260478684857  
0.3004990428099914 0.2819339428332781 0.5360463081869887  
0.6112814008120896 0.5239362519266371 0.0474252987853000  
0.7901748909801919 0.0317936292254858 0.1649237078331379  
0.0918448254360567 0.7704708412583247 0.6644794068611002  
0.0916046036037871 0.5223920310891290 0.6588309939995237  
0.7846468688707403 0.2728328419491026 0.1557760290599444  
0.6237684148329665 0.7677863062313444 0.0485895540521628  
0.2751267567003421 0.0400113630492197 0.5358088842423214  
0.3311498135086246 0.2580075940427146 0.3440762013092659  
0.5671055994680028 0.5620292387800869 0.8648901180166675  
0.8220612931494344 0.0525124706118048 0.3597341245916962  
0.0764305560456751 0.7446790019249244 0.8616263999250029  
0.0703712821553746 0.5595178182638922 0.8503428524763595  
0.8335642922073441 0.2428201052273842 0.3372784104651934  
0.5731065982585528 0.7355460148779537 0.8693256400576722  
0.3256384734893783 0.0569487550774652 0.3500147009554229  
0.4009890235097815 0.1543006554392922 0.2780056690682664  
0.4819829764832906 0.6459410695026727 0.7753048056421618  
0.9041886016718327 0.1477646983241113 0.4264601357467295  
0.9919821569221589 0.6516717284812068 0.9304443125401749  
0.4361869153497428 0.5966081348133656 0.5836925216116972  
0.3888421938725917 0.7083541108834541 0.5998607104922534  
0.5092210191114768 0.7068729574813254 0.5106224631005363  
0.2345118031859558 0.6506481350229819 0.5746512234354242  
0.5780801864795663 0.6340693125544201 0.6311220026085814  
0.3177524425645412 0.6001841866013301 0.4491316592087366  
0.6260786124831154 0.4730325747189129 0.3017148811932587  
0.2747078461731960 0.3365646599041749 0.7975860886457756  
0.1272047343687050 0.8236890780519551 0.40839923066311414  
0.7740036521039488 0.9733108055053599 0.9014318127965679

0.7747679606320050 0.3282243073559977 0.9008119014609426  
0.1272533580460052 0.4762024391241307 0.4060802510695769  
0.2794331813746245 0.9828533918473686 0.7900493415710350  
0.6234046065012439 0.8242076486981089 0.2875625336083802  
0.5243134437499838 0.4369574068626204 0.4589436234033550  
0.3794567792864499 0.3623894126020156 0.9508980313336421  
0.0234570397357280 0.8604660486112284 0.2567475165050678  
0.8785958499125804 0.9356675478343912 0.7526189030102645  
0.8773602888157884 0.3661556798107112 0.7519638595138364  
0.0252637905001145 0.4380292296820734 0.2557671744937837  
0.3691238840068063 0.9358986799151103 0.9517703338163643  
0.5264018819062414 0.8676625840049761 0.4424610639136997  
0.4744491419949463 0.4445584236165120 0.6750162403972303  
0.4362134652107041 0.3480262828361690 0.1618668044727912  
0.9707064576594050 0.8504826285858254 0.0402641947376617  
0.9274110410123109 0.9485365392564254 0.5350886381063763  
0.9268934713531463 0.3491771997423191 0.5326149065839799  
0.9691466104446129 0.4511981432747591 0.0383906319690499  
0.4233604758806594 0.9567305715763365 0.1648662911836297  
0.4801184013309435 0.8429754594599362 0.6582655644582114  
0.3226404980531614 0.4518765401540765 0.6486661698713084  
0.587617775399706 0.3519144305727702 0.1504740740877642  
0.8182553313512604 0.8524238074779688 0.0472222247208130  
0.0819250218720801 0.9484758984876936 0.5491798104400413  
0.0836229183204228 0.3509341734502680 0.5474540316672321  
0.8147434910392408 0.4495681750911237 0.0492789295686891  
0.5777616597270876 0.9515027672407377 0.1499920687931293  
0.3247608146753049 0.8554965721245916 0.6537160281776597  
0.2677350747212848 0.4321304807046776 0.4277261616811498  
0.6311710477316881 0.3658669271651315 0.9311267971533518  
0.7645597248630042 0.8673500907587456 0.2629475863725068  
0.1355967467009816 0.9314441460923422 0.7717796190325218  
0.1288911221013621 0.3667474063209411 0.7746051002583407  
0.7678302360655691 0.4312915820066313 0.2681496529608403  
0.6264495955101048 0.9383818678013600 0.9249042898266217  
0.2721803364791403 0.8636188448399911 0.4300325383334176  
0.4051312300362155 0.4684859499518905 0.3190766979418896  
0.5007594481197110 0.3195689762354461 0.8243636683144400  
0.8971992118238509 0.8285242866900213 0.3771662584172432  
0.0012613762688888 0.9711083470576592 0.8824110498411545  
0.9970605504332132 0.3270523653562401 0.8855176050427400  
0.8995051001665161 0.4709819256606941 0.3783002223246383  
0.4950150654814107 0.9600936925204580 0.8181094230228523  
0.4027578944088324 0.8338897396704394 0.3145340911918985  
0.6254297535741198 0.2278732364342447 0.2859137633630892  
0.1200352028279752 0.0711481542544479 0.4084660123993331  
0.777255578101854 0.7293970557837984 0.9158681571436375  
0.7721453474510980 0.5732551543785573 0.9197639390682983  
0.1288620432675086 0.2265800679254251 0.4153637356053095  
0.2739204841617398 0.7274091042799052 0.7826445171805384  
0.6202990649765324 0.0747390381529112 0.2903838482435263  
0.5234422008148765 0.2755034382756942 0.4494809783466125  
0.3754721597805138 0.5196765570216910 0.9496579583247223  
0.0145334737581267 0.0185799863926321 0.2587342791255406  
0.8825934582696420 0.7777665128647434 0.7610769546174149  
0.8763995236369887 0.5241508622770936 0.7627876991456982  
0.0266562666615261 0.2786806630996328 0.2633330225265004  
0.3619139412417626 0.7805583731450779 0.9384372135493158  
0.5197275648016898 0.0236417660999283 0.4394740115035495  
0.4853433751539371 0.2199071031091939 0.6544268640011751  
0.4180975540465935 0.5703140188666720 0.1494688818100975  
0.9792143963110983 0.0705364899821385 0.0525044421092999  
0.9091440846083152 0.7277264146847807 0.5477245314981836  
0.9070820842376982 0.5723956607481159 0.5505572668253883  
0.9799776408192707 0.2272006077291156 0.0602308090077797  
0.4216668266901850 0.7302472818310297 0.1344420405540738  
0.4695011119084765 0.0644124764527846 0.6444413855952816  
0.3277718708005130 0.2372754360684344 0.6306154816588374  
0.5754694166868730 0.5677731089424060 0.1359823175065420  
0.8202312866445237 0.0723632294086754 0.0687232271527582  
0.0685714173910914 0.7263951873114490 0.5677026809769486  
0.0665448181218447 0.5698745719139223 0.5672082140614848  
0.8223045857212454 0.2299258125672191 0.0683419786257212  
0.5767695259241682 0.7266183215723944 0.1266776916384710  
0.3146306671931533 0.0812261834132034 0.6231913498282751  
0.2726325793446118 0.2801195713690655 0.4207404851429361  
0.6248576134188738 0.5223314319614040 0.9259299510369872  
0.7668698936163547 0.0235554597561456 0.2819382731817694  
0.1266185188285886 0.7733457978546103 0.7757417939039999  
0.1228841671861057 0.5238786143896024 0.7735249401857750  
0.7713957192528179 0.2752529946355898 0.2771373340993151  
0.6296608074973468 0.7775094210405956 0.9257836655415533  
0.2665943470519888 0.0236574480229434 0.4159819776491006  
0.4048344764129373 0.2322517055158217 0.3126538063498313  
0.4915458666364798 0.5710402830298381 0.8231453198875303  
0.8975769795042706 0.0691944417653843 0.3933007296217182  
0.1000059956061567 0.7295933773900971 0.8942212797248564  
0.9962563509588619 0.5738216844514353 0.8919067894266366  
0.9037919520947902 0.2261996207907611 0.3913915939347626  
0.3989432068483605 0.0751396662516491 0.3076482413185315

Structure 24 S=8/2

1.0000000000000000  
 20.1473052208878016 0.0000000000000000 0.0000000000000000  
 0.0000000000000000 19.7681594983396991 0.0000000000000000  
 0.0000000000000000 0.0000000000000000 13.2309279702280005  
 Al C Fe H O Si  
 2 1 2 10 198 94  
 Direct  
 0.2763921099907876 0.5718679326837091 0.7813037778314609 F F F  
 0.4917861276370701 0.7304959405831326 0.8190320605204349 F F F  
 0.4972682583947008 0.6367092793893731 0.3456590346384535 T T T  
 0.3495997841359491 0.6198512030410942 0.5876848763634150 T T T  
 0.4698671996983312 0.6781139091462406 0.6201665641992067 T T T  
 0.2018081702005858 0.6490934247464537 0.5977843753433945 T T T  
 0.2302594305184757 0.6918602269799785 0.5088735012299542 T T T  
 0.5955599259785341 0.6581730797004905 0.7001115571957677 T T T  
 0.5932740309782617 0.6776560799172020 0.5844706815494056 T T T  
 0.2817558068686917 0.5917644845196738 0.4194743430078873 T T T  
 0.3552060277302303 0.5856815890550010 0.3764240929369797 T T T  
 0.5003744269049607 0.5871603345543450 0.3804755935488118 T T T  
 0.5415818246825403 0.6611295364414286 0.3166870372189028 T T T  
 0.4962072381124093 0.6827193371330201 0.4485816107498224 T T T  
 0.4489791693831433 0.6584010315866945 0.3286472336960119 T T T  
 0.7064286604979486 0.4736509767409700 0.3131832703205006 F F F  
 0.1956435325519408 0.3296531296776521 0.8096316897850500 F F F  
 0.2082265381765751 0.8221994031353219 0.3981361362420728 F F F  
 0.6940366111821916 0.9676762761362525 0.8825649179920276 F F F  
 0.6944653013711033 0.3281894408580257 0.8837804200801713 F F F  
 0.2081529869674412 0.4835616650807140 0.3944143893928285 F F F  
 0.2008660984949628 0.9713526813784483 0.8100790670932696 F F F  
 0.7051680287180986 0.8181641715439554 0.2985410418945449 F F F  
 0.5927509974495209 0.4667976772605158 0.4119932268317754 F F F  
 0.3071173380465524 0.3395861599253820 0.9090161145137259 F F F  
 0.0944872202862257 0.8290476757491945 0.2970310751965926 F F F  
 0.8111921494563390 0.9734085525920975 0.792845494689477 F F F  
 0.8083006603042548 0.3320096742451710 0.7882366835343717 F F F  
 0.0962978655748401 0.4689238192006613 0.2916966885278427 F F F  
 0.3152969227615330 0.9883886865436651 0.9035470882833749 F F F  
 0.5969724306632926 0.8360293025617267 0.4042657070421427 F F F  
 0.6022565445706931 0.5383811009063635 0.2415740695643578 F F F  
 0.3039014440236087 0.2758551608856266 0.7316852778911382 F F F  
 0.1057455451283218 0.7548411693650934 0.4657306771365128 F F F  
 0.7887300586350960 0.0408175086089386 0.9645557819036270 F F F  
 0.7993544224929963 0.2606409538684673 0.9578535682148583 F F F  
 0.0989344717940526 0.5446455693352448 0.459107755538748 F F F  
 0.2902764515067844 0.0560677660866062 0.7368808870185575 F F F  
 0.5930528390574850 0.7557245771390484 0.2440035552248077 F F F  
 0.6045301261067664 0.4033130519227726 0.2383246741742511 F F F  
 0.2911916867765925 0.4113271990346163 0.7421610702636059 F F F  
 0.1062590150948495 0.8904310627913929 0.4726276444538300 F F F  
 0.7999418717753102 0.9061783507280410 0.9606097371392579 F F F  
 0.7959818595199692 0.3957170315403360 0.9614612980794917 F F F  
 0.1090523763637918 0.4101556969834661 0.4704791387171809 F F F  
 0.3132337409739705 0.9245529595050144 0.7260922468715805 F F F  
 0.6052690755512060 0.8889530565135431 0.2198170314104999 F F F  
 0.5232991366370214 0.4534757901240738 0.5782055304208333 F F F  
 0.3820771856139089 0.3484062850350398 0.0705981332265608 F F F  
 0.0225908518411160 0.8551691175318723 0.1350981845233008 F F F  
 0.8779321681573578 0.9401342548999736 0.6308238637424779 F F F  
 0.8800525089853366 0.3615344070336519 0.6294352803747358 F F F  
 0.0196665049242242 0.4441651381672429 0.1337938594097636 F F F  
 0.3709435112573374 0.9493846116247369 0.0759692538136960 F F F  
 0.5256783098776197 0.8637244239053956 0.5646686343238514 F F F  
 0.5154312273756076 0.3568846667391270 0.4370495844138276 F F F  
 0.3954539772413099 0.4408972414202239 0.9255757513641925 F F F  
 0.0180046358447186 0.9397415803525533 0.2923066924217892 F F F  
 0.8813528661595882 0.8577357946386854 0.7904440222130589 F F F  
 0.8829558364962651 0.4439205821256422 0.7899164135159111 F F F  
 0.0203625827335614 0.3583097101821693 0.2905460052187152 F F F  
 0.3427386629135967 0.8605903249771458 0.9315545786764901 F F F  
 0.5207187901909123 0.9459225057197500 0.4044268584433937 F F F  
 0.4619650589330959 0.4751859311853082 0.4022911723824976 F F F  
 0.4352143387866292 0.3164053799108189 0.8921696148725502 F F F  
 0.9641550343184306 0.8184283241608412 0.3081135347921347 F F F  
 0.9433395290450406 0.9745879592664934 0.7973651316887498 F F F  
 0.9392617430395092 0.3241007139626291 0.7996452194733195 F F F  
 0.9669508649975356 0.4798206782815910 0.3111814490548994 F F F  
 0.4422036734083079 0.9495241120874169 0.9120265982224680 F F F  
 0.4662018895906357 0.8270911764935320 0.3916429937722015 F F F  
 0.4714679935512436 0.5135062806834867 0.7407672760515140 F F F  
 0.4329354282285252 0.2758999168268090 0.2182266828949935 F F F  
 0.9776978426076326 0.7771574118564857 0.9892323352674097 F F F  
 0.9202568201325079 0.0242900517023799 0.490186996504544 F F F  
 0.9130053093876995 0.2728387723025065 0.4897737311652008 F F F  
 0.9793907473980354 0.5239479477065387 0.9863725186754451 F F F  
 0.4172675375016155 0.0292799316423213 0.2152769583745027 F F F  
 0.4934365741662319 0.7658612341410702 0.6945991313219793 F F F  
 0.3974740223957767 0.4327528915917043 0.6258763390967417 F F F  
 0.5108981122248721 0.3577090224569872 0.1143246973783363 F F F  
 0.8960136893757848 0.8625783592496461 0.0817031396462156 F F F  
 0.0038290696646257 0.9371913873245745 0.5747690905110829 F F F  
 0.0038607901118155 0.3585782805962978 0.5627623899891177 F F F  
 0.8935614861273677 0.4413898044144275 0.0772953247359069 F F F

0.4990042228364899 0.9403418158887575 0.1299109825773073 F F F  
0.4007583269387283 0.8550955804425513 0.6238215165879026 F F F  
0.4942335324733165 0.3823502290471126 0.7397550151301786 F F F  
0.4218500225224915 0.4095767120445544 0.2374772523371931 F F F  
0.9897665652057128 0.9092739309095492 0.9588823491203655 F F F  
0.9080141454297461 0.8935052104602264 0.4507319208276641 F F F  
0.9054768793654517 0.4033906759203987 0.4462483233690477 F F F  
0.9879727037256387 0.3910700926061210 0.9576701561255305 F F F  
0.4023100816414171 0.8977353290845898 0.2514142120976999 F F F  
0.4959210813550072 0.8906664073530024 0.7535059316299169 F F F  
0.3139441591508785 0.5345552630461796 0.6694460430307032 F F F  
0.6038631214085584 0.2747203014275073 0.1872459354576819 F F F  
0.8092017135384353 0.7757007978799848 0.0049972420273292 F F F  
0.0935202360979446 0.0228410581030403 0.4999344805435442 F F F  
0.1011175115441461 0.2771400500100398 0.5016343672928230 F F F  
0.8008886442372614 0.5258233383548969 0.0089782765964515 F F F  
0.5897701466142422 0.0224412150125488 0.2081241880107711 F F F  
0.3016971993976441 0.7903483408730878 0.7196884329945235 F F F  
0.2749400895663783 0.4343329333627537 0.5495656575688130 F F F  
0.6347971984635876 0.3678224565519130 0.0512100713593924 F F F  
0.7694227802502454 0.8660382442067203 0.1406755516683234 F F F  
0.1262652156802915 0.9424981506417893 0.6512310034528994 F F F  
0.1216752619275923 0.3604797259740806 0.6525828359649353 F F F  
0.7682310818033642 0.4340173489974859 0.1451497728631068 F F F  
0.6191488561205603 0.9510132103069964 0.0460678374284242 F F F  
0.2754560555050247 0.8627639621811909 0.5595218033384697 F F F  
0.3346956883530225 0.4493619020222184 0.3749529693456566 F F F  
0.5648589625541263 0.3312665713170730 0.8917311055133297 F F F  
0.8347298318269054 0.8384924799442999 0.3062478120163448 F F F  
0.0724532260557709 0.9656966233382391 0.8293312259005248 F F F  
0.0679389269962272 0.3266330818345438 0.8288864493572277 F F F  
0.8369721989240873 0.4652218431199984 0.3037761055573611 F F F  
0.5664993638932074 0.9744543029769162 0.8654694520836728 F F F  
0.3357630301681169 0.8302972254518082 0.3894541237875373 F F F  
0.2444251574517011 0.3543913967752843 0.3933904227623373 F F F  
0.6309930412546336 0.4472454214536086 0.8883216832325758 F F F  
0.7525388280447700 0.9434439788220388 0.3034881591489551 F F F  
0.1419954310125533 0.8528916725233415 0.8008818580774673 F F F  
0.1276597794211796 0.4450269617852172 0.8094668467307216 F F F  
0.7625425050666408 0.3536176426894428 0.3081797222151934 F F F  
0.6232953200170144 0.8555040483361793 0.9025030605520783 F F F  
0.2644775849084482 0.9444769205559780 0.4007986591506238 F F F  
0.3915368222357003 0.5405530080762020 0.2669168756595752 F F F  
0.5086015965058550 0.2502735796514983 0.7620905340631410 F F F  
0.8860129402034147 0.7598771329368361 0.4416493046261039 F F F  
0.9998487151123143 0.0440631808874699 0.9423736720541669 F F F  
0.9933544489330259 0.2557632082754395 0.9482493720483944 F F F  
0.8883694821285104 0.5386397370716978 0.4445065587007093 F F F  
0.4707424950254691 0.0243067386821352 0.7534246719666342 F F F  
0.4012805640328736 0.7608794195652209 0.2549453273516065 F F F  
0.7039575006389356 0.2334651368987721 0.3060901121418951 F F F  
0.1918133315146662 0.5618258513915961 0.7777366589069388 F F F  
0.1963979509113329 0.0580438724480459 0.3812571427730305 F F F  
0.6994787889604339 0.7465683528634059 0.8975984072710688 F F F  
0.6926677502933671 0.5648800493737909 0.9043233364276730 F F F  
0.2091598653954847 0.2276496380605337 0.4068298509698565 F F F  
0.1918445096115917 0.7290308995195076 0.7787327453988127 F F F  
0.6993964196428522 0.0651784911207542 0.3044607343457457 F F F  
0.5856636229442600 0.2505132786091764 0.3845938854195836 F F F  
0.3126436245844246 0.5434952970994971 0.8910158416332052 F F F  
0.0771778217994878 0.0588367060352937 0.3064362254995601 F F F  
0.8158340261928387 0.7420989448160995 0.8096357111248125 F F F  
0.8078105796945110 0.5538975106129698 0.8121969208149835 F F F  
0.0959255546639497 0.2479904624677332 0.3061815582701755 F F F  
0.2960918868364075 0.7387212169649686 0.9031932188879850 F F F  
0.5854822597014220 0.0618248203950955 0.4017312064265468 F F F  
0.6051291619877688 0.1506640793900615 0.2537273127841075 F F F  
0.2980769996752954 0.6548158571736380 0.7466989791346066 F F F  
0.1074747795597588 0.1495955896795635 0.4452433853797118 F F F  
0.7873655527027026 0.6511624569519938 0.9496422987057755 F F F  
0.5314759862310368 0.2538217008303150 0.5653740220969112 F F F  
0.3688000441022226 0.5286158821923195 0.0726383295129125 F F F  
0.0167272034037182 0.0245755081981827 0.1367595680539040 F F F  
0.8770622458816604 0.7709429038586606 0.6388804092617661 F F F  
0.8716472458093563 0.5317127194695956 0.6410530048320595 F F F  
0.0231984658670612 0.2694209857753620 0.1412950735824552 F F F  
0.3667177985945571 0.7654080411921811 0.0658572498515682 F F F  
0.5152721875696855 0.0247826211321822 0.5651100946170544 F F F  
0.4532804382937243 0.2404354411538847 0.4078424181188822 F F F  
0.4436630198737390 0.5640748957064616 0.9212569214237547 F F F  
0.9455061112265213 0.0526505334198006 0.2974030286137861 F F F  
0.9485750058394515 0.7421169940778114 0.7998013850942698 F F F  
0.9399132377148547 0.5643959024277194 0.8041672415561649 F F F  
0.9640776669455562 0.2378352272683557 0.3124686279270037 F F F  
0.4280852466638194 0.7620605474711653 0.8891776246505145 F F F  
0.4536387396490795 0.0625973243130744 0.4003609684793332 F F F  
0.4989761146251936 0.1395705129834965 0.6601767941453289 F F F  
0.3975299133249024 0.6488419399311454 0.1512563801989515 F F F  
0.9991009611140527 0.1486888989864560 0.0663586087720418 F F F  
0.8842542146587249 0.6503051037180683 0.5533039912739639 F F F  
0.4088326759078740 0.236904717680267 0.6301610197137677 F F F  
0.4915637188168915 0.5531604806884758 0.1376615045691807 F F F

0.8987233551637743 0.0615540430353363 0.0681277841807599 F F F  
0.9902375782564690 0.7309626227475476 0.5542796725295498 F F F  
0.9886375090119088 0.5683913185945286 0.5638123724706716 F F F  
0.8999744872018525 0.2377762206898666 0.0861898199545266 F F F  
0.4932387555675177 0.7393568490865334 0.1126822660944669 F F F  
0.3928689824682223 0.0679514270901578 0.607972595313671 F F F  
0.2987265471087923 0.1623709947178469 0.6213010005695736 F F F  
0.5881500132745501 0.6467697904741385 0.1277820045635423 F F F  
0.7993536499199081 0.1510072133111322 0.0735457992619928 F F F  
0.0935952348219118 0.6486234920614251 0.5847856873598687 F F F  
0.3019974355120070 0.2802487283440414 0.5322233960427027 F F F  
0.6031214855883889 0.5269448562274377 0.0419527921612186 F F F  
0.7890676503860306 0.0320526131642964 0.1652115066182773 F F F  
0.0924391515625302 0.7718592491030023 0.6633330015567367 F F F  
0.0944531260333008 0.5227178959169905 0.6568789290594452 F F F  
0.7822987712501117 0.2719305993507746 0.1546520989635098 F F F  
0.6165713896711438 0.7672057301544655 0.0506027493821506 F F F  
0.2737678001715267 0.0414699532665921 0.5397259900643121 F F F  
0.3295245198324182 0.2573013771941177 0.3394044174402850 F F F  
0.5679169624186571 0.5645507850912637 0.8542096050164645 F F F  
0.8220901485133325 0.0513493281629920 0.3601852044953944 F F F  
0.0736251056100699 0.7446354201290077 0.8591050366499076 F F F  
0.0685202821802520 0.5610751515421839 0.8462166570238878 F F F  
0.8330175780459115 0.2413348600849545 0.3351688439991420 F F F  
0.5708523687421803 0.7331829157859460 0.8684149576449300 F F F  
0.3255289615532888 0.0590580130224936 0.3550909816609149 F F F  
0.4016347108900362 0.1535991185153307 0.2764337921319324 F F F  
0.4763724131264269 0.6465144040294177 0.7738294212123407 F F F  
0.9035382249928432 0.1474020652943580 0.4263790668081029 F F F  
0.9917101501035148 0.6514741977903995 0.9336293045877895 F F F  
0.4414707433593507 0.5992953844068595 0.5743254600222679 T T T  
0.3881935113358412 0.7066998932023045 0.6137116787896266 T T T  
0.5020456433326943 0.7146373307783515 0.5085010225000829 T T T  
0.2387191276282531 0.6517238847100573 0.5497494192373964 T T T  
0.5742495140507722 0.6475848171679185 0.6355590296361725 T T T  
0.3282142402706531 0.6020231763870076 0.4337173571946822 T T T  
0.6264131928135015 0.4706012612187038 0.3002657130631903 F F F  
0.2747343207372808 0.3389060224001028 0.7965089699658350 F F F  
0.1280743776875113 0.8244892975701603 0.4087345561056210 F F F  
0.7729877586831506 0.9723240654597518 0.9013118845070522 F F F  
0.7742490318063773 0.3285089320351844 0.8995141109288890 F F F  
0.1273552306054668 0.4766891711445140 0.4047486374657083 F F F  
0.2794158493136720 0.9840169403932535 0.7936242303697725 F F F  
0.6249644241088674 0.8249234025491745 0.2902536605326702 F F F  
0.5237833331838075 0.4372407460726251 0.4583219441053430 F F F  
0.3799451095253232 0.3620673531899783 0.9496637142666984 F F F  
0.0245670272275404 0.8609369005671468 0.2570815118480354 F F F  
0.8783472970484212 0.9362416017553556 0.7530022594072321 F F F  
0.8777713317984279 0.3657863822510166 0.7512448632226594 F F F  
0.0254018296927612 0.4372345973145926 0.2552382957310257 F F F  
0.3680606907683455 0.9365421062319967 0.9553171876888626 F F F  
0.5269374555414359 0.8676571748821331 0.4428942234804012 F F F  
0.4716557141944691 0.4463270045246048 0.6719977743923806 F F F  
0.4366736897527730 0.3477480124002525 0.1602117741535452 F F F  
0.9714883398680030 0.8513031181190627 0.0403316991693430 F F F  
0.9279059598391370 0.9486144573206943 0.5358641306928291 F F F  
0.9264378864978013 0.3488099261549564 0.5314745753926218 F F F  
0.9698432074044661 0.4501565544548640 0.0376508233357882 F F F  
0.4233193189558335 0.9538894965163180 0.1683051922279617 F F F  
0.4775552480038172 0.8432835894898432 0.6577697424687443 F F F  
0.3203628006231014 0.4532927934209567 0.6464701694000965 F F F  
0.5884393921108710 0.3507802904548072 0.1477138592398930 F F F  
0.8190672470425255 0.8521781229827354 0.0470215761961796 F F F  
0.0820788239253147 0.9487744768969861 0.5498733440997796 F F F  
0.0834476236725408 0.3514494136655628 0.5465019028079752 F F F  
0.8153014683506683 0.4494136718049191 0.0485318982828886 F F F  
0.5779247439281789 0.9507205662207454 0.1511663004624211 F F F  
0.3232831620196990 0.8569736685017233 0.6581794202783300 F F F  
0.2657449495148327 0.4299861660426600 0.4284183358633200 F F F  
0.6311590218577763 0.3693021535868937 0.9283681845534275 F F F  
0.7656305295062111 0.8669843619775719 0.2629673230455154 F F F  
0.1349639565947882 0.9325005101676496 0.7722244802241747 F F F  
0.1277491460737394 0.3665978543708306 0.7744257669742183 F F F  
0.7685600376406967 0.4310382786647580 0.2677545301376512 F F F  
0.6254610736154049 0.9359514804547189 0.9255862179433834 F F F  
0.2715139061817595 0.8664340585002748 0.4372562407627925 F F F  
0.4034892177944727 0.4663236184624182 0.3196583619101716 F F F  
0.5004907258487350 0.3214748791572788 0.8210977879653072 F F F  
0.8984285712841427 0.8285522618869763 0.3775849760465277 F F F  
0.0011282602131004 0.9723903705624508 0.8826235663420974 F F F  
0.9970699529985509 0.3257295236599234 0.8848151093858334 F F F  
0.8999170520097834 0.4710178897018409 0.3778937271465352 F F F  
0.4935538266654547 0.9595212426235307 0.8197503083854372 F F F  
0.4015569091575770 0.8301201730263088 0.3202615168057577 F F F  
0.6247745432972707 0.2278399247663927 0.2829953611574112 F F F  
0.1191785360374595 0.0718265741506698 0.4093163601397478 F F F  
0.7769503144148331 0.7294414471340502 0.9159755169754504 F F F  
0.7721087826548185 0.5733690925006556 0.9188187061762321 F F F  
0.1284403020372125 0.2262850769593570 0.4146560093732603 F F F  
0.2728827666787979 0.7279173236618135 0.7861348249941997 F F F  
0.6200622566225178 0.0739725501306694 0.2915885503629738 F F F  
0.5216474434383898 0.2754152790724902 0.4480605499822090 F F F

0.3772791110379146 0.5198027267834959 0.9501098287585350 F F F  
0.0145557449649161 0.0188031857762567 0.2589391844142241 F F F  
0.8805756085588854 0.7781340486540742 0.7608230095681776 F F F  
0.8753858244800554 0.5236484921725761 0.7628736023637330 F F F  
0.0262473406779051 0.2783008466196932 0.2631443424429207 F F F  
0.3602940934015493 0.7807146732303778 0.9452457624934141 F F F  
0.5190672486560430 0.0238783264419595 0.4425278669022816 F F F  
0.4861338891436731 0.2200144009101521 0.6538916414945888 F F F  
0.4134440270594837 0.5690049389614487 0.1546580801354906 F F F  
0.9779619296245627 0.0703170667755089 0.0532192095159303 F F F  
0.9099422047625509 0.7276511629837614 0.5477106849094397 F F F  
0.9088540164022874 0.5724400412419470 0.55106608019419152 F F F  
0.9782828755226447 0.2275751383285467 0.0604408660258997 F F F  
0.4157701107713763 0.7286723789573273 0.1446488741800849 F F F  
0.4691607202972179 0.0642547436161820 0.6471219845055813 F F F  
0.3286365918627467 0.2383688279203398 0.6297703633911027 F F F  
0.5708543521873466 0.5670752376122579 0.1370300972513832 F F F  
0.8191252570557808 0.0715804706705185 0.0680791057803560 F F F  
0.0694833550685630 0.7268114118041993 0.5673904803500278 F F F  
0.0685572036817064 0.5706103156875812 0.5663885701132614 F F F  
0.8207142678635932 0.2299394430825643 0.0670015498394321 F F F  
0.5720946621351288 0.7271452797120688 0.1328284164274010 F F F  
0.3144580078937409 0.0819135621500564 0.6267686391602183 F F F  
0.2717880606983982 0.2785732514918422 0.4183864617721582 F F F  
0.6231142465587354 0.5258930808936597 0.9227579567331290 F F F  
0.7665385716813233 0.0231839047211793 0.2823844935126090 F F F  
0.1251800285382174 0.7744035873285711 0.7762220035072502 F F F  
0.1225273205283131 0.5236907960491806 0.7736251203150530 F F F  
0.7707778011613513 0.2747047262033107 0.2763836054954254 F F F  
0.6263178835491630 0.7750532207849119 0.9282358750962985 F F F  
0.2658296705810770 0.0257064558645368 0.4196868437538797 F F F  
0.4039195554831494 0.2318290572329147 0.3113587170030172 F F F  
0.4901026638101413 0.5715975731848673 0.8215079504641665 F F F  
0.8975232455621196 0.0688003896070057 0.3933634588423800 F F F  
0.9981942453172010 0.7290944094019309 0.8952914195528123 F F F  
0.9955348260658781 0.5741263576384270 0.8925428044537895 F F F  
0.9030678586491803 0.2256911467155689 0.3906010096088792 F F F  
0.3991255137003478 0.0753463594949366 0.3121964573647915 F F F

Structure TS reaction CH4/22→24 S=8/2

1.0000000000000000  
20.1473052208878016 0.0000000000000000 0.0000000000000000  
0.0000000000000000 19.7681594983396991 0.0000000000000000  
0.0000000000000000 0.0000000000000000 13.2309279702280005

Al C Fe H O Si  
2 1 2 10 198 94  
Selective dynamics

Direct

0.2763655988350564 0.5718321290942967 0.7813991104943128 F F F  
0.4917876855230787 0.7304082423844562 0.8193706365011550 F F F  
0.4967892175792477 0.6391066945692571 0.3504724826469126 T T T  
0.3496595287933036 0.6200104401716671 0.5881520679702651 T T T  
0.4696460288035117 0.6782938558854781 0.6195847447330184 T T T  
0.2018554073842012 0.6490849354524286 0.5978192329725189 F F F  
0.2300735925089080 0.6916631255019792 0.50860932444717205 T T T  
0.5954867220976803 0.6581758781142341 0.7001456165746662 T T T  
0.5935769265737237 0.6772015439700902 0.5843726068460984 T T T  
0.2817964428584159 0.5912035816980696 0.4199329736108343 T T T  
0.3555224991086748 0.5861968729978358 0.3773659616560276 T T T  
0.5000553952844724 0.5880262432860887 0.3802081315398869 T T T  
0.5404112603387372 0.6610050565480379 0.3150545394989602 T T T  
0.4969273902008642 0.6801580655379502 0.4435328416180196 T T T  
0.4484098961301189 0.6577420398506657 0.3269528369586863 T T T  
0.7064303555257254 0.4736473858275616 0.3131928045459418 F F F  
0.1956469230658087 0.3296512045623743 0.8096257875946122 F F F  
0.2082241322740970 0.8221908870676060 0.3981383856929313 F F F  
0.6940405629808239 0.9676702090733187 0.8825574475848086 F F F  
0.6944666994234794 0.3281948157540384 0.8837782344226568 F F F  
0.2081580212463621 0.4835727183008061 0.3944401598519605 F F F  
0.2008689333794962 0.9713443524481491 0.8100745893064172 F F F  
0.7051699219046696 0.8181807698864674 0.2985598655910806 F F F  
0.5927821771114523 0.4667485154897761 0.4120149600711542 F F F  
0.3071155629619469 0.3395873400272507 0.9090111887918084 F F F  
0.0944780539232042 0.8290414998375297 0.2970373784897191 F F F  
0.8111988347596863 0.9734104241810542 0.7928503499080364 F F F  
0.8083043578704547 0.3320082412177143 0.7882406423113011 F F F  
0.0963002184678103 0.4689254441993214 0.2917075298260485 F F F  
0.3153009895199403 0.9883785676802290 0.9035381621536089 F F F  
0.5969695496221306 0.8360335473929794 0.4042854548773960 F F F  
0.6022751714814021 0.5383547620176046 0.2415402835831344 F F F  
0.3038938546560601 0.2758561080412747 0.7316861685113452 F F F  
0.1057577096205407 0.7548303051663865 0.4657329427811945 F F F  
0.7887312539547366 0.0408163526754279 0.9645568515084975 F F F  
0.7993561296922067 0.2606420228736397 0.9578544162615472 F F F  
0.0989503253609598 0.5446517108145414 0.4591169425399499 F F F  
0.2902769452731206 0.0560569435714342 0.7368647124157235 F F F  
0.5930829533337345 0.7558093839882574 0.2439296298829206 F F F  
0.6045401823759207 0.4033092284228914 0.2383327339599077 F F F  
0.2911859291897088 0.4113681279124677 0.7421471245134512 F F F  
0.1062562430855678 0.8904205686312920 0.4726414846112306 F F F  
0.7999509623376255 0.9061787002565111 0.9606082677041670 F F F  
0.7959951540728198 0.3957175174168626 0.9614555019122619 F F F

0.1090626429777615 0.4101571210384733 0.4704905481515667 F F F  
0.3132304845215899 0.9245455847170021 0.7260862196252802 F F F  
0.6052680298998467 0.8889848353705077 0.2198565775696508 F F F  
0.5232976840424186 0.4534728467006559 0.5782152690044100 F F F  
0.3820740952604709 0.3484133508180562 0.0706018122380385 F F F  
0.0225932803852515 0.8551669257672003 0.1350967605357738 F F F  
0.877933351660981 0.9401300136882327 0.6308227350305939 F F F  
0.8800619276291712 0.3615348692221687 0.6294415354807015 F F F  
0.0196686240954236 0.4441748034614719 0.1337999147437117 F F F  
0.3709451173849914 0.9493702921546614 0.0759699617239988 F F F  
0.5256906804551917 0.8636604292828736 0.5646789736039182 F F F  
0.5154389887137896 0.3568861394113441 0.4370878636304383 F F F  
0.3954172417286159 0.4408993189735924 0.9255445181858093 F F F  
0.0180036886483990 0.93974138866459914 0.2923061535579166 F F F  
0.8813562463176368 0.8577346775628456 0.7904399713713559 F F F  
0.8829588457050548 0.4439230859092760 0.7899167869254597 F F F  
0.0203709536874186 0.3583101138590621 0.2905482559683819 F F F  
0.3427214463465660 0.8605803475059588 0.9315194011813830 F F F  
0.5207062450141322 0.9459323177818533 0.4044383582397302 F F F  
0.4619217432760010 0.4751130000084771 0.4023421068905506 F F F  
0.4352105468185243 0.3164120814430760 0.8921673735795750 F F F  
0.9641479481711315 0.8184291734311699 0.3081074345950086 F F F  
0.9433483721745191 0.9745820568839321 0.7973531712736843 F F F  
0.9392658687123614 0.3241071006371143 0.7996475384139572 F F F  
0.9669564542950937 0.4798218944132557 0.3111974253342424 F F F  
0.4421981131421475 0.9495138362558464 0.9120147600660715 F F F  
0.4661849541735137 0.8270489961147902 0.3918012082745292 F F F  
0.4714611139482585 0.5135381404063750 0.7407430400980246 F F F  
0.4329266957824203 0.2758926695232589 0.2182078349919649 F F F  
0.9777136160959117 0.7771580754383294 0.9892273179272806 F F F  
0.9202591191475946 0.0242906876839939 0.4901870716797845 F F F  
0.9130158013136622 0.2728349160216297 0.4897815911262953 F F F  
0.9793881805174820 0.5239540647718357 0.9863804316409244 F F F  
0.4172618649384248 0.0293001634011389 0.2152286586802674 F F F  
0.4933343241092487 0.7658666190069852 0.6949056160568716 F F F  
0.3974831855943108 0.4327723632826519 0.6259161567579454 F F F  
0.5108985161701440 0.3576978224654610 0.1143103769260065 F F F  
0.8960148230930542 0.8625686708339870 0.0817074469046943 F F F  
0.0038286054409582 0.9371895883964498 0.5747686571492920 F F F  
0.0038653115808174 0.3585829061242976 0.5627629421854863 F F F  
0.8935623918874853 0.4413936073539020 0.0773047435435359 F F F  
0.4990044864478591 0.9403610941266791 0.1298802922917872 F F F  
0.4007673529406333 0.8550513144099625 0.6238399347379442 F F F  
0.4942346926926930 0.3823422293122150 0.7397719795478039 F F F  
0.4218396794004562 0.4095622769012266 0.2374949676806750 F F F  
0.9897615088210898 0.9092729602121778 0.9588832503453517 F F F  
0.9080148626886526 0.8935054104628151 0.4507303915050613 F F F  
0.90548065634116165 0.4033876937010561 0.4462490420202485 F F F  
0.9879737041849950 0.3910761764218691 0.9576752245189795 F F F  
0.4023444436084844 0.8977738487021014 0.2514982690793417 F F F  
0.4959430267012905 0.8906543602485684 0.7535410616572165 F F F  
0.3140565699522924 0.5346904447805656 0.6693294132253627 F F F  
0.6038632638306112 0.2747234797850311 0.1872581472747825 F F F  
0.8092061147977176 0.7756996604344764 0.0049965165383270 F F F  
0.0935269851706977 0.0228377867160106 0.4999365359047871 F F F  
0.1011223877579042 0.2771405748950357 0.5016365346818219 F F F  
0.8008987344160943 0.5258226959279071 0.0089701571883367 F F F  
0.5897703238836627 0.0224493018078036 0.2081144639783474 F F F  
0.3017022462601773 0.7903378921807587 0.7196446946393564 F F F  
0.2749285542520639 0.4343693967764040 0.5495817342491307 F F F  
0.6348009045651892 0.3678070967177263 0.0512114646387118 F F F  
0.7694244869577034 0.8660445738619131 0.1406749109033143 F F F  
0.1262644069871897 0.9424888676028687 0.6512327617221061 F F F  
0.1216821440212712 0.3604844467506467 0.6525840362475392 F F F  
0.7682358509812275 0.4340087294579149 0.1451490859370992 F F F  
0.6191525956501920 0.9510170663343942 0.0460658479680305 F F F  
0.2754671361655454 0.8627578687500943 0.5595008144510061 F F F  
0.3346970212495961 0.4493604601869663 0.3749677832472571 F F F  
0.5648651184134366 0.3312511440561963 0.8917320908884108 F F F  
0.8347255475913329 0.8384954406119220 0.3062495504489107 F F F  
0.0724568236265668 0.9656729893287022 0.8293477674576266 F F F  
0.0679384719171807 0.3266526319981509 0.8288953439627846 F F F  
0.8369765240735987 0.4652087774045768 0.3037669500305071 F F F  
0.5665087727084384 0.9744562307786993 0.8654635366067822 F F F  
0.3357618054197786 0.8303028109788499 0.3894420278756385 F F F  
0.2444139954661537 0.3543919094488643 0.3934182228460443 F F F  
0.6309790331199281 0.4472405540279496 0.8883274561941974 F F F  
0.7525357719686028 0.9434476607077258 0.3034838392949766 F F F  
0.1420235837382933 0.8528772931941475 0.8008702607114699 F F F  
0.1277007039244538 0.4450347049901922 0.8094595268749742 F F F  
0.7625411076489925 0.3536173955850828 0.3081835766091316 F F F  
0.6232888102272867 0.8555023562958013 0.9024916826798659 F F F  
0.2644689289726969 0.9444760981791589 0.4007895476495520 F F F  
0.3914690018888010 0.5405340741201172 0.2669085321359859 F F F  
0.5085868768708366 0.2502622294202510 0.7621027718173110 F F F  
0.8860115192248159 0.7598792120678368 0.4416506289384259 F F F  
0.9998545244727381 0.0440617687858946 0.9423703607751079 F F F  
0.9933650666048806 0.2557685743124338 0.9482523774945051 F F F  
0.8883716355320246 0.5386359525295461 0.4445065707169675 F F F  
0.4707440263072726 0.0242891928636340 0.7534039326533986 F F F  
0.4012237436993189 0.7609901750852970 0.2548241008665002 F F F  
0.7039620368555504 0.2334582559895182 0.3060927667223012 F F F

0.1918101475363869 0.5618554579406805 0.7776773469943663 F F F  
0.1963973363660827 0.0580438049779488 0.3812521017138602 F F F  
0.6994869195102282 0.7465852871852903 0.8975723606785806 F F F  
0.6926719782011972 0.5648591786142489 0.9042953958179041 F F F  
0.2091606956248171 0.2276509834149536 0.4068335209922935 F F F  
0.1918594260698825 0.7289921017056500 0.7786594408179184 F F F  
0.6993992452147353 0.0651836204668044 0.3044595039747975 F F F  
0.5856751453791205 0.2505018736471527 0.3846204025117430 F F F  
0.3126341687928047 0.5435034248063673 0.8910362069242481 F F F  
0.0771759729224115 0.0588359071750162 0.3064385494907427 F F F  
0.8158470846275208 0.7420883864866994 0.8096422316660536 F F F  
0.8078186464524748 0.5539063765639867 0.8122004210256222 F F F  
0.0959251469354285 0.2479908543687088 0.3061861194329154 F F F  
0.2961029937362198 0.7386761849600276 0.9031243254438905 F F F  
0.5854854009227068 0.0618183966530310 0.4017285512496329 F F F  
0.6051307289036245 0.1506663067222789 0.2537340985737373 F F F  
0.2981132150577963 0.6547782667204203 0.7464505267160035 F F F  
0.107472095929433 0.1495948941785485 0.4452478664241895 F F F  
0.7873683736991239 0.6511604533242732 0.9496438928203546 F F F  
0.5314737253270962 0.2538208908130741 0.5653831179122051 F F F  
0.3687967550634497 0.5286253152394380 0.0726653724347770 F F F  
0.0167275582968074 0.0245769332488663 0.1367577092691690 F F F  
0.8770646833036153 0.7709420800762530 0.6388817319637994 F F F  
0.8716515339949353 0.5317150481708808 0.6410566074475099 F F F  
0.0232018746389713 0.2694215383972605 0.1412954427319875 F F F  
0.3667250496102596 0.7653829045657830 0.0658653450456796 F F F  
0.5152682228074070 0.0247755704196777 0.5651061250261478 F F F  
0.4532871818613202 0.2404307770124774 0.4078434906914339 F F F  
0.4436340554181015 0.5640603677763636 0.9212514185462410 F F F  
0.9455054740644115 0.0526490123329566 0.2974038108141954 F F F  
0.9485945787243182 0.7421270437318128 0.7997817163311254 F F F  
0.9399230416287168 0.5643944158607468 0.8041594472683045 F F F  
0.9640780272028735 0.2378374433086279 0.3124753839463352 F F F  
0.4280417443397369 0.7620833088675312 0.8891725955614618 F F F  
0.4536337553396521 0.0625875925552251 0.4003430649665418 F F F  
0.4989766367620234 0.1395674924305794 0.6601738942493043 F F F  
0.3974881683731155 0.6488363353292144 0.1511400972984518 F F F  
0.9991089619389797 0.1486900167792697 0.0663442457773513 F F F  
0.8842618495758643 0.6503045404281451 0.5533009259317367 F F F  
0.4088262465297987 0.2368918191582239 0.6301662391495810 F F F  
0.4915533146229762 0.5531753440272027 0.1376579202282713 F F F  
0.8987252651447690 0.0615579580571790 0.0681190995960606 F F F  
0.9902381688486273 0.7309649395682953 0.5542695433309390 F F F  
0.9886385157194226 0.5683889691351354 0.5637985661341460 F F F  
0.8999777100630695 0.2377717271619701 0.0861794572789663 F F F  
0.4932374997603404 0.7393741106220517 0.1125820130999244 F F F  
0.3928683281647025 0.0679434945211739 0.6079754268487605 F F F  
0.2987196425561649 0.1623670932925236 0.6212927081228798 F F F  
0.5881741062390446 0.6467656430859847 0.1276724977607699 F F F  
0.7993563215377435 0.1510072775735622 0.0735482779723000 F F F  
0.0936151214745493 0.6486233889464756 0.5847898368522877 F F F  
0.3019823714071066 0.2802553064047899 0.5322393366623359 F F F  
0.6031210222693417 0.5269449793687926 0.0419832506569975 F F F  
0.7890748168017652 0.0320531547199678 0.1652134334258122 F F F  
0.0924486842957677 0.7718538823067078 0.6633275814399298 F F F  
0.0944570432892959 0.5227247311856260 0.6568788949296263 F F F  
0.7823072744945918 0.2719296809700396 0.1546585498301880 F F F  
0.6165677109744081 0.7671925873017429 0.0506282535041649 F F F  
0.2737748169101266 0.0414555236439469 0.5397210840800284 F F F  
0.3295280103340517 0.2573046428215022 0.3394166447864748 F F F  
0.5679280501777058 0.5645284172980780 0.8542366696788832 F F F  
0.8220906395137462 0.0513427061948732 0.3601877319401794 F F F  
0.0736435871738124 0.7446207356888550 0.8591045021924657 F F F  
0.0685298287926130 0.5610724295670693 0.8462337959353192 F F F  
0.8330177405547445 0.2413465937341641 0.3351809906122440 F F F  
0.5708881772759185 0.7331897777033021 0.8684160099286515 F F F  
0.3255277596070627 0.0590473501546072 0.3550740584929102 F F F  
0.4016297770116353 0.1536016519181871 0.2764371706696025 F F F  
0.4764169540951286 0.6465315426471960 0.7740784645530070 F F F  
0.9035353095536394 0.1474011584830563 0.4263732833971474 F F F  
0.9917237355503943 0.6514756602706271 0.9336187888471699 F F F  
0.4412026183847463 0.5991261361761896 0.5745360319150056 T T T  
0.3876692446510429 0.7068226838489228 0.6135633243562716 T T T  
0.5009319603586823 0.7133205705764025 0.5082726354892299 T T T  
0.2386921493115082 0.6516643205519022 0.5497054261305300 T T T  
0.5741638233936889 0.6475420093051317 0.6356150374607159 T T T  
0.3281096979884836 0.6019004551015019 0.4345780311548377 T T T  
0.6263952391012282 0.4706370312317816 0.3002768372361331 F F F  
0.2747367744242167 0.3389028188759795 0.7965184518456070 F F F  
0.1280716043774461 0.8244891949295479 0.4087299851141140 F F F  
0.7729903567000207 0.9723224696366586 0.9013161122798365 F F F  
0.7742459136829112 0.3285122923880408 0.8995187415784045 F F F  
0.1273580041351039 0.4766850008078833 0.4047517977415893 F F F  
0.2794146273545550 0.9840206433959366 0.7936289454043788 F F F  
0.6249578597087790 0.8248983398218144 0.2902262145125647 F F F  
0.5237890982326689 0.4372809304947225 0.4582797272946877 F F F  
0.3799488997188050 0.3620692690675895 0.9496822734781816 F F F  
0.0245585251196445 0.8609370566611929 0.2570803291745989 F F F  
0.8783478039583272 0.9362405159240339 0.7530007719882690 F F F  
0.8777680222436217 0.3657881549183841 0.7512498811683201 F F F  
0.0253995410904153 0.4372359699969777 0.2552455268982854 F F F  
0.3680575047996300 0.9365282184845682 0.9553289476109867 F F F



0.5269471567492516 0.8676816597042247 0.4428299768806454 F F F  
 0.4717025202865983 0.4463166728253825 0.6720132331894888 F F F  
 0.4366795866067079 0.3477618281165036 0.1602269813558692 F F F  
 0.9714848965538394 0.8513027992348299 0.0403353571627534 F F F  
 0.9279026145494882 0.9486149395260810 0.5358600584600737 F F F  
 0.9264375366982449 0.3488089306416171 0.5314743153351884 F F F  
 0.9698363525371931 0.4501587807370342 0.0376620564277772 F F F  
 0.4233267932900873 0.9538848115283685 0.1683196965131728 F F F  
 0.4775616256602433 0.8433480125634460 0.6578129541261646 F F F  
 0.3203895766926763 0.4532647979185569 0.6464263400277659 F F F  
 0.5884417730890092 0.3507958799122974 0.1477348867643968 F F F  
 0.8190625610878755 0.8521748609409343 0.0470268520862334 F F F  
 0.0820747432774951 0.9487743762905083 0.5498723577204672 F F F  
 0.0834471758402415 0.3514464161039612 0.5465015948453953 F F F  
 0.8152958502618119 0.4494148698298162 0.0485384574816905 F F F  
 0.5779278718985026 0.9507161557647805 0.1511742328510550 F F F  
 0.3232677289803689 0.8569925825948417 0.6581591029654206 F F F  
 0.2657616815697779 0.4299863351408888 0.4283839213260734 F F F  
 0.6311588123860687 0.3693060046801051 0.9283824407019665 F F F  
 0.7656179677480210 0.8669823229784583 0.2629700812295326 F F F  
 0.1349634854285213 0.9324966368485548 0.7722233873450861 F F F  
 0.1277495931433990 0.3665946206416351 0.7744246360809228 F F F  
 0.7685395139396363 0.4310446829221988 0.2677625820275154 F F F  
 0.6254706270911541 0.9359430159343489 0.9255986130206963 F F F  
 0.2715221505484777 0.8664330589292604 0.4372124576676697 F F F  
 0.4035161915082170 0.4663635137806708 0.3196504832245779 F F F  
 0.5004981066970018 0.3214641706916765 0.8211169871528057 F F F  
 0.8984185896675072 0.8285540655983965 0.3775796142005703 F F F  
 0.0011245572374179 0.9723884138692043 0.8826268137536957 F F F  
 0.9970643267335078 0.3257345293052438 0.8848234246613345 F F F  
 0.8999082061153274 0.4710129604482205 0.3778872380982889 F F F  
 0.4935646683801380 0.9595397422965064 0.8197836064477499 F F F  
 0.4015766183774261 0.8300836117445272 0.3202447055241109 F F F  
 0.6247746234422564 0.2278474451962467 0.2830023990037489 F F F  
 0.1191782511062414 0.0718273665071507 0.4093140824358912 F F F  
 0.7769471353883830 0.7294374753489095 0.9159820209462239 F F F  
 0.7720997219359376 0.5733666771604149 0.9188235965392124 F F F  
 0.1284423777721884 0.2262843591550592 0.4146548114050503 F F F  
 0.272884930306247 0.7279435581792129 0.7860994397767698 F F F  
 0.6200648215433375 0.0739756729602590 0.2915766887863853 F F F  
 0.5216554894748953 0.2754340433691382 0.4480599291542475 F F F  
 0.3772857966216066 0.5198014698606386 0.9501944503776727 F F F  
 0.0145524228330700 0.0188041225429458 0.2589374493991556 F F F  
 0.8805757559568193 0.7781328166193262 0.7608250947078048 F F F  
 0.8753816237157181 0.5236498805677314 0.7628778719580112 F F F  
 0.0262450920399644 0.2782998137106389 0.2631458773649555 F F F  
 0.3602883144730171 0.7807097959705374 0.9453334427299112 F F F  
 0.5190669956672167 0.0238934742414187 0.4425176731717357 F F F  
 0.4861374965196106 0.2200170489438946 0.6538876846009813 F F F  
 0.4134627168156157 0.5690348711558428 0.1547486438161911 F F F  
 0.9779615993466280 0.0703197603245869 0.0532161980587276 F F F  
 0.9099339631252406 0.7276524260142523 0.5477070902913610 F F F  
 0.9088455557462183 0.5724363128762207 0.5510549668672269 F F F  
 0.9782839456434615 0.2275759063295766 0.0604411328440619 F F F  
 0.4158128840261242 0.7286286593373674 0.1447270911526317 F F F  
 0.4691621797603887 0.0642601096442093 0.6471118232074531 F F F  
 0.3286352184771673 0.2383646191322839 0.6297654791797669 F F F  
 0.5708356792960387 0.5671028527592199 0.1371109961331527 F F F  
 0.8191240318300572 0.0715819673751810 0.0680807920331787 F F F  
 0.0694747060802712 0.7268124375809890 0.5673822015989103 F F F  
 0.0685474439238476 0.5706097677394268 0.5663794810295286 F F F  
 0.8207121331425924 0.2299416128947200 0.0670035549658010 F F F  
 0.5720702605033523 0.7271090357743475 0.1329300787456518 F F F  
 0.3144583414860236 0.0819120227617560 0.6267541297830448 F F F  
 0.2717911663393480 0.2785721243297701 0.4183839256203541 F F F  
 0.6231130185373388 0.5258852473575075 0.9228286957360083 F F F  
 0.7665357890874702 0.0231818864338607 0.2823832738593808 F F F  
 0.1251775792836582 0.7743989832629339 0.7762153658027557 F F F  
 0.1225103170928818 0.5236878884933702 0.7736234900038426 F F F  
 0.7707721298408856 0.2747122090091523 0.2763893450450396 F F F  
 0.6263319239261165 0.7750523654446440 0.9283211463266809 F F F  
 0.2658302677601228 0.0257053790379018 0.4196725789636986 F F F  
 0.4039297253035912 0.2318356309562120 0.3113561269608169 F F F  
 0.4901305908332461 0.5716093100799426 0.8215915962129543 F F F  
 0.8975188902411801 0.0688001407580572 0.3933619539333932 F F F  
 0.9981955415475312 0.7290958995479144 0.8952862556753445 F F F  
 0.9955274763531818 0.5741245296788833 0.8925490441460155 F F F  
 0.9030621551092963 0.2256927638035080 0.3906035681137254 F F F  
 0.3991238868639968 0.0753467917496664 0.3121680762147747 F F F

Structure CH4/22v S=8/2  
 1.0000000000000000  
 20.1473052208877697 0.0000000000000000 0.0000000000000000  
 0.0000000000000000 19.7681594983396742 0.0000000000000000  
 0.0000000000000000 0.0000000000000000 13.2309279702280254  
 Al C Fe H O Si  
 2 1 2 10 198 94  
 Direct  
 0.2761335386326023 0.5707665963613242 0.7896865298033918  
 0.4930906345917692 0.7301305538333143 0.8066416916605527  
 0.6490803423612925 0.6736811019280777 0.4229027982762099  
 0.3367676191565144 0.6234691768428251 0.5970669113248215

0.4623789020946563 0.6720622404858528 0.5904230892698901  
0.1988481137390009 0.6365984496471064 0.6214506913273319  
0.2144568277157661 0.6632117531208056 0.5121587368266214  
0.5779418583628290 0.6470836511312056 0.6761727312334856  
0.5892371208453513 0.6522804116014411 0.5572999664364586  
0.2886840921926103 0.5788760840565897 0.4114801982493299  
0.3608705650375315 0.6045042873303703 0.3910984977378715  
0.6594565769178637 0.6285132277656008 0.4686687791176121  
0.6959714892179699 0.6996667278264879 0.4072183833127898  
0.6158343443918175 0.7098553698702812 0.4606972817665375  
0.6254200419429866 0.6579578510906947 0.3523756669539351  
0.7060818650168265 0.4749339884666655 0.3167578102842319  
0.1949135208770164 0.3270111034378055 0.8119767386418211  
0.2065096614338695 0.8235207094322019 0.3923460303939572  
0.6943723566400362 0.9737620199857364 0.8797217297108778  
0.6940342713253762 0.3274119612755609 0.8886463171348827  
0.2069284543999436 0.4851639865891955 0.3987900852415244  
0.2014684238204759 0.9719531574324257 0.8077846933584653  
0.7036572972923477 0.8210230343940188 0.2977617292373291  
0.5926257975677366 0.4680743536813429 0.4171101025639357  
0.3059970279568650 0.3399373835548209 0.9132518045104189  
0.0920905685570527 0.8282147098562950 0.2968119857221931  
0.8126095201390326 0.9749216177299985 0.7922768495634580  
0.8068146391782728 0.3333324853660531 0.7899038584821798  
0.0962813277202444 0.4688032025629935 0.2928190938899343  
0.3175238384933375 0.9865388800124464 0.8983645679076983  
0.5936099697764695 0.8381953871750253 0.3978842173556687  
0.6017398180260609 0.5425405863634462 0.2494832763262819  
0.3041734952405148 0.2714018828550543 0.7394983826830873  
0.1064321395057581 0.7548830041290641 0.4665180792718595  
0.7909023056189349 0.0431729460097285 0.9629494916598392  
0.8011623941825288 0.2619786359400827 0.9595076087213310  
0.0960170625749663 0.5433246093006497 0.4608216521075377  
0.2919500832277478 0.0546060193177052 0.7331822880207953  
0.5913204810309143 0.7622256827465079 0.2344912764794388  
0.6025006950126656 0.4082569710461603 0.2403870689956047  
0.2903888521161534 0.4068825591013836 0.7418819191077880  
0.1056114668078467 0.8904063817152534 0.4720412232753171  
0.7974817773116658 0.9080734354568901 0.9597486712026119  
0.7948622716894781 0.3970496909856904 0.9635480516104815  
0.1090975163395511 0.4085641992361279 0.4705023728884551  
0.3107232813358783 0.9222609139966349 0.7202700932773733  
0.6084011201726527 0.8952596994293233 0.2159057717583082  
0.5255930058076668 0.4511451600429248 0.5848803220587677  
0.3801499739702104 0.3518781210913520 0.0760489267314270  
0.0206458643644052 0.8551722736703387 0.1345336916403093  
0.8776560917640445 0.9387133762596531 0.6302668116549106  
0.8792740003158764 0.3614605780248769 0.6307055706422369  
0.0192815566267124 0.4459923331251022 0.1342489093427974  
0.3712994028114563 0.9487942190437986 0.0731586893427893  
0.5275381924248023 0.8665783119977860 0.5634442726968587  
0.5201472696053190 0.3550692361345483 0.4426207495314947  
0.3922664130686216 0.4430919738882870 0.9290162292797783  
0.0168779295741769 0.9397032828472018 0.2917418617231719  
0.8800150416416259 0.8577548579531912 0.7918307336193648  
0.8818905779839782 0.4445810408809001 0.7906004144563745  
0.0197839626097844 0.3588574855024840 0.2897010596059462  
0.344822730321202 0.8594319632600144 0.9279086424100342  
0.5210531131649051 0.9491417756277832 0.4016644946211254  
0.4606658894429876 0.4713763573637144 0.4133346832599253  
0.4344034602942387 0.3185913066307809 0.8992236404554188  
0.9623707127507879 0.8181982221636785 0.3071590066722515  
0.9449185442291793 0.9734037393952104 0.7947379421246104  
0.9377993676913282 0.3246651771966593 0.8016712852617096  
0.966831153579299 0.4803916364287074 0.3121030478733772  
0.4446436316626951 0.9479057269542100 0.9108853732945908  
0.4614141388201379 0.8320043142075680 0.3999575909687895  
0.4743566939043088 0.5122254265784523 0.7464281950365470  
0.4318276351438781 0.2796313837842768 0.2234556566568232  
0.9773969486195332 0.7766740215867388 0.9883845759693174  
0.9173921055335432 0.0242824768355367 0.4896549546669973  
0.9146636212399537 0.2738542447439131 0.4906764860742412  
0.9768603535183898 0.5253088336509216 0.9870888745011315  
0.4162847695565430 0.0323468434964026 0.2099132359687969  
0.4914697413025699 0.7617055536512251 0.6788394636108775  
0.3992754532404951 0.4312883545193843 0.6332299743045786  
0.5092614049775007 0.3609268836418678 0.1179660661337831  
0.8943719513503465 0.8624402712161681 0.0785404135101341  
0.0028638063678354 0.9379396152280106 0.5716756779657525  
0.0038200651520816 0.3600656020199327 0.5664820075547690  
0.8927412958767823 0.4418109330222478 0.0796263140612418  
0.4986516442705165 0.9415536857753786 0.1286419463865374  
0.4014603424022078 0.8559482928180069 0.6192885917203645  
0.4961691073917927 0.3812381638671547 0.7465696241115994  
0.4208363844994945 0.4129602938809740 0.2428283062489737  
0.9891240963240173 0.9086764150812681 0.9577629729721931  
0.9062848851592831 0.8936051771520952 0.4490238105149307  
0.9059169295448425 0.4047148584827910 0.4485653625363540  
0.9869788649265793 0.3925298724808736 0.9586535634695486  
0.4027056273411221 0.9022084735239603 0.2532395465639882  
0.4957219863821753 0.8840913531630068 0.7540615220955992  
0.3147967372688808 0.5319406015968107 0.6814399007141957

0.6007020045777767 0.2788664500064794 0.1975103192875043  
0.8054045354461385 0.7772567715227600 0.0038381591972673  
0.0938937922590182 0.0231701945987484 0.4992557013225325  
0.0985821945074239 0.2760088990935281 0.5034447603577871  
0.8009470728031043 0.5270761583255550 0.0111326647877689  
0.5877725648165234 0.0271892551817588 0.2019417005354401  
0.3039744809021487 0.7881649776436297 0.7151356472170127  
0.2791580513162878 0.4382905499867861 0.5501720041750603  
0.6341893745705314 0.3666325380372343 0.0564555216371260  
0.7686572426588739 0.8683324276457842 0.1402689856721348  
0.1246499073270591 0.9424804612923863 0.6509363682484175  
0.1229682168551864 0.3599546282311399 0.6529781326737710  
0.7672293758235168 0.4358183623041790 0.1474783185557504  
0.6165489909080853 0.9556250874381682 0.0394426258407187  
0.2772283008492494 0.8582597383179636 0.5525046023526538  
0.3324358721331765 0.4617940402172398 0.3718289651629050  
0.5647017248017725 0.3270928826911979 0.8980512499065765  
0.8331629161374274 0.8366415308951674 0.3052089784069339  
0.0736475797254429 0.9647410700943333 0.8312998325345256  
0.0666679498228055 0.3298652042800754 0.8282887056015359  
0.8367286523922767 0.4661291649755869 0.3057073281295469  
0.5671182057737392 0.9741768467015267 0.8549705209634560  
0.3327425814183575 0.8258279076618025 0.3757587576536294  
0.2500032645399103 0.3579125552461669 0.3945947037454950  
0.6277865839682434 0.4451362669431559 0.8934500900107666  
0.7554583371355884 0.9448276546533544 0.3050137334001801  
0.1441239098300421 0.8527295442172088 0.7991017465289724  
0.1324962834127369 0.4452084731012697 0.8086423940614194  
0.7624834141503879 0.3548682775251951 0.3098990556201235  
0.6283258352786953 0.8588349967630418 0.8993052075133672  
0.2681839571332406 0.9433831704386291 0.3982199338452656  
0.4045460644753401 0.5461774960339413 0.2734287367584072  
0.5045350564101027 0.2490348498157450 0.7684508978252982  
0.8847901471421490 0.7597279584761681 0.4418319423510925  
0.9993355930467347 0.0433962501379080 0.9415644306489561  
0.9942796078752445 0.2572345194102325 0.9486907557993182  
0.8884797785675665 0.5398948657912548 0.4451062309761152  
0.4668673583302769 0.0169879015064623 0.7449497411129019  
0.4135705150060833 0.7665475807601431 0.2472084486534156  
0.7053077851815489 0.2345766314805077 0.3057511401601712  
0.1912483595104766 0.5651745549112981 0.7786455770881611  
0.1962673329235134 0.0548632342883979 0.3774261522623167  
0.7007098965662020 0.7481991206474337 0.8850357431755183  
0.6932671757123914 0.5609333374106350 0.9012905848200237  
0.2093650528149411 0.2323041782658238 0.4099347663577794  
0.1932011550760748 0.7285389796981360 0.7760603263974009  
0.6988867712174321 0.0652187510411867 0.2989751943669358  
0.5896561974446999 0.2472664143121904 0.3939534342531588  
0.308353702324993 0.5459911709681405 0.9039297915680278  
0.0763440200899733 0.0590263058583619 0.3061792766974247  
0.8210271133465545 0.7383987908399655 0.8119958409735887  
0.8097497805507807 0.5565254767771703 0.8148909896068223  
0.0966831857113968 0.2493579067356330 0.3071992658307035  
0.2974588283189395 0.7380592802267461 0.9007952946041941  
0.5858509451952200 0.0644719150498260 0.3973054964783219  
0.6061962882703895 0.1536048180186819 0.2512771915693568  
0.2992382232614709 0.6532758267997407 0.7458430183908973  
0.110546053721567 0.1494139770125834 0.4434373271406761  
0.7831531612759552 0.6519177094815569 0.9524716773181054  
0.5313252387651395 0.2513552101720212 0.5718206766274190  
0.3726878823889919 0.5297573185591408 0.0802025817306186  
0.0164115828224584 0.0247194161868318 0.1364615299681356  
0.8774915480729040 0.7720685434496223 0.6391111483019141  
0.8694790746483128 0.5321422667257139 0.6415550658194022  
0.0244154270770802 0.2691988856329490 0.1417073836684381  
0.3716315072017087 0.7644421722761341 0.0599220351317753  
0.5165712480033461 0.0292250989373433 0.5610807870680875  
0.4570808536368102 0.2389738048020053 0.4094311791144414  
0.4394290375356926 0.5672729287418002 0.9207242762830971  
0.9449313287749382 0.0528242327176874 0.2975434155724882  
0.9527813870623214 0.7449135955673302 0.7964385549849120  
0.9417074050017759 0.5636572271077549 0.8014920908763064  
0.9648940820607141 0.2380972079251190 0.3129170976920433  
0.4283934007008010 0.7607152573471435 0.8773006477044915  
0.4536729387120898 0.0647222048358747 0.3958906794566358  
0.4960845823772152 0.1381372798764495 0.6692569785064327  
0.4001791134708715 0.6512183032286213 0.1555864306196098  
0.0020791052695981 0.1489171592355493 0.0637227625598477  
0.8840958736273871 0.6509924279629812 0.5551140808218319  
0.4077281601669851 0.2362579839285688 0.6308813379196576  
0.4968758853913303 0.5597501537492001 0.1320844096469145  
0.8995746675091547 0.0649537989471938 0.0685676738767200  
0.9899783166170968 0.7321463985151730 0.5527446219101577  
0.9872501017315755 0.5676235743958101 0.5682528645388020  
0.9015254479336713 0.2361406668635053 0.0868129898071796  
0.4976592597023682 0.7344228728127846 0.0987987504887792  
0.3926640362721486 0.068703255421597 0.6015549655579469  
0.2976954900000277 0.1619865062268074 0.6194169628818419  
0.5972407595099138 0.6486972635355039 0.1304092287669240  
0.7986487216667395 0.1522745604639096 0.0755881694996600  
0.0918450628783496 0.6484764685346712 0.5844762956318159  
0.2992659655659962 0.2833655577620035 0.5407405176411826

0.6110533149550641 0.5264145448550743 0.0501902346304933  
0.7901785412138020 0.0316581332035265 0.1632455182493308  
0.0919579099807357 0.7710524775887054 0.6644631494621653  
0.0945778319612873 0.5233655712320995 0.6589605303616061  
0.7849536897934283 0.2739352039018334 0.1561766190911837  
0.6204211051226064 0.7663175336825720 0.0409651861867619  
0.2731215040559675 0.0413706871744755 0.5362712171350053  
0.3319625715934533 0.2572280570690696 0.3500987286630440  
0.5662976017162529 0.5637754071961383 0.8670940186219633  
0.8211538883546217 0.0558518980549857 0.3580044599596974  
0.0762722620387852 0.7449910250223974 0.8614589045678638  
0.0690829599314398 0.5584768767702848 0.8500602343605950  
0.8339769621042820 0.2429372054386869 0.3372820141979873  
0.5714270290187186 0.7400465752782012 0.8566467962738317  
0.3254239080014595 0.0599415561143494 0.3519842812862281  
0.4011851059567334 0.1560373161860093 0.2750071796375518  
0.4817854226905688 0.6448141068865784 0.7712272432407902  
0.9048282826209921 0.1482665592442029 0.4275157532529246  
0.9921496735671216 0.6518507303876213 0.9305251618162305  
0.4278071233313597 0.5918129070571870 0.5780229958911871  
0.3811766076195457 0.7064708376997122 0.5937756337746669  
0.4847709623869075 0.6960671906694263 0.4772132899250642  
0.2314958541327454 0.6349632869273961 0.5666373498093746  
0.5594484460016693 0.6351488916522137 0.6102795912122249  
0.3219954089783597 0.6112390204457684 0.4348069955501294  
0.6258130766248018 0.4735469385457269 0.3053008106846165  
0.2743028592012077 0.3360109724969297 0.8004010128591151  
0.1270353291852774 0.8245553708580907 0.4075498222232638  
0.7733376834451470 0.9751021442604108 0.8998283901256273  
0.7739274518165670 0.3293436948404484 0.9020643219527732  
0.1263552736747720 0.4761855834610823 0.4065909609584792  
0.2802240776695413 0.9826123401915170 0.7895709725796494  
0.6238216467707058 0.8293093169939564 0.2848402628320905  
0.5251170786484660 0.4357726105118749 0.4647543759716152  
0.3782317139697915 0.3641109033106649 0.9547079282948399  
0.0227440727959009 0.8608075855560061 0.2564634393437961  
0.8787268421961116 0.9359924594946193 0.7524660157883031  
0.8765438339099848 0.3663535358380691 0.7525097360094092  
0.0251475194132712 0.4379454814842869 0.2555928342822676  
0.3698787720487783 0.9353204767988075 0.9524336329278386  
0.5258207387741960 0.8714391170863259 0.4415028171698734  
0.4736908551647120 0.4450347070243617 0.6784805401878754  
0.4352194250175884 0.3513229449339210 0.1651959393990745  
0.9701668169851726 0.8509311954419997 0.0390941479229262  
0.9265317349035255 0.9485145989993096 0.5342958559084406  
0.9266429328020466 0.3497658523742245 0.5334823083169874  
0.9686621734454500 0.4514164153527703 0.0388955196590521  
0.4229789107670768 0.9559774863642132 0.1662874910628236  
0.4779920375815899 0.8413396435470724 0.6527012596025796  
0.3220964529811032 0.4519689489878645 0.6515561462031199  
0.5865276191028601 0.3536454258109392 0.1528755931320719  
0.8169179631341661 0.8535535390060503 0.0452889619791159  
0.0813801400432195 0.9490833524343346 0.5486532439151766  
0.0830824518749023 0.3509247981444168 0.5481855419623956  
0.8144822878321500 0.4505577223834699 0.0508011358021581  
0.5774697019400352 0.9547854332611881 0.1462486471776310  
0.3238632314369928 0.8552751895493975 0.6524651873795811  
0.2675959688195908 0.4343175980451408 0.4296715708429428  
0.6300780617984879 0.3672987926358467 0.9336774322781142  
0.7652769007694523 0.8683540735765195 0.2625055073384719  
0.1355261139098933 0.9324872413297994 0.7714737308014837  
0.1287694434520779 0.3665101102327039 0.7749030361904843  
0.7679524947192510 0.4324557173564168 0.2700543309430494  
0.6262420856587925 0.9393086496821751 0.9198265889540321  
0.2719893814268594 0.8641470362590222 0.4303873339325743  
0.4057172997982613 0.4710391128778904 0.3248936033173976  
0.4996679175027206 0.3203420173606346 0.8278603003041833  
0.8968367060189730 0.8281191048937857 0.3768730225797203  
0.0014952981821450 0.9717197653693548 0.8819303515535866  
0.9963466184161294 0.3273437686628059 0.8855656867610473  
0.8999360609954488 0.4718927426999240 0.3792232577464201  
0.493557656411380 0.9555124669319282 0.8148155582004838  
0.4026884283421666 0.8322468882733409 0.3171791417186289  
0.6256345118508926 0.2293922419117398 0.2874740222259117  
0.1199033045902228 0.0712855627850453 0.4076946918157586  
0.7764493135403905 0.7296174799943027 0.9138364822570709  
0.7716388995110991 0.5737331994532452 0.9202672191453203  
0.1288418899432963 0.2272338002412440 0.4157273661779614  
0.2741136688527150 0.7279142481930688 0.7842334394203320  
0.6199088345564510 0.0763810192372853 0.2868626832686786  
0.5245328314724694 0.2734585700936962 0.4540476184321521  
0.3757314853313278 0.5219809441337234 0.9567761775158269  
0.0138220973224622 0.0188734662739313 0.2586591005234118  
0.8825481667810512 0.7783252327916922 0.7610555226440865  
0.8754319741706589 0.5243253383970352 0.7633089744584040  
0.0268305884511496 0.2787807665657576 0.2634293229254546  
0.3633245867028887 0.7796173996649131 0.9396903431969071  
0.5194050184314511 0.0272482307283060 0.4386781130781806  
0.4842971316594720 0.2187008821636667 0.6593761899101017  
0.4192269622895271 0.5721925821168179 0.1579315489263652  
0.9788369119849332 0.0709795362576401 0.0523077041672958  
0.9096273371582453 0.7283189696500292 0.5478996030122323

0.9077787287888052 0.5728867772110444 0.5526692891891205  
0.9798715260960840 0.2275271992837881 0.0602049681297533  
0.4215038317449176 0.7294394233526967 0.1394502890146297  
0.4679526901962973 0.0634114082931047 0.6447562085357688  
0.3275100716428929 0.2376905135652898 0.6336585567979609  
0.5764423513132145 0.5699137819034075 0.1401670201230703  
0.8198642506176799 0.0732248307848485 0.0677666942944393  
0.0690278343425784 0.7271014260715543 0.5673669913032166  
0.0670134693202405 0.5702164107697874 0.5683127825749749  
0.8219969676785969 0.2306793777900446 0.0684921130214858  
0.5762612233409856 0.7279798418295453 0.1252264160480650  
0.3143281250665391 0.0815837363592374 0.6228857493610520  
0.2730273994416993 0.2814128006618908 0.4244520923202660  
0.6238496729718874 0.5240084246917246 0.9284252504709696  
0.7670793382328007 0.0244842398956142 0.2804720696644567  
0.1263866051860924 0.7742997046522566 0.7759947544595615  
0.1233496665566822 0.5238651776201306 0.7751947164019432  
0.7720420430649250 0.2762002496483721 0.2776090769813293  
0.6282839614680386 0.7775906513796716 0.9187353428970187  
0.2666074845547514 0.0246072316652301 0.4162446574404953  
0.4054093199178664 0.2330335265136050 0.3154161738693541  
0.4903791100397739 0.5721569518187046 0.8256908766860586  
0.8968773953423878 0.0700685459531110 0.3930323618149690  
0.9999070544409656 0.7297489086374680 0.8941629510792705  
0.9954533683796217 0.5738770930750027 0.8923348513335665  
0.9041684948247338 0.2265807085402521 0.3917661357147718  
0.3986929617818000 0.0773072952830752 0.3084667872103085

Structure 25 S=8/2

1.0000000000000000  
20.1473052208877697 0.0000000000000000 0.0000000000000000  
0.0000000000000000 19.7681594983396742 0.0000000000000000  
0.0000000000000000 0.0000000000000000 13.2309279702280254

Al C Fe H O Si

2 1 2 10 198 94

Direct

0.2705167359401970 0.5713983207046440 0.7902513180768961  
0.4956162803029752 0.7281359750119593 0.8068624320433950  
0.6692612414095338 0.6664125985417837 0.4533041314284857  
0.3312217196229266 0.6275365747238740 0.6028029476108592  
0.4630227084780105 0.6613047957900705 0.5989489966953609  
0.1896750956611761 0.6482881399868196 0.5661257794564495  
0.2389672547806696 0.6590352003310606 0.4727454111706042  
0.5801512102039416 0.6347134119996147 0.6627023844774794  
0.5948770502177285 0.6507269528036962 0.5464115890843625  
0.3425700461866954 0.5869425073183465 0.3980102046125068  
0.385115283819793 0.6514068354576864 0.4287628282002321  
0.6976839213115911 0.6240544055195287 0.4833571002261163  
0.6803957218352965 0.7176130579397301 0.4785442171792037  
0.4960779397936473 0.6458746149609458 0.4331870122799321  
0.6405080396818849 0.6594109605646143 0.3843552248342421  
0.7059772145540106 0.4793177605512000 0.3149138196674319  
0.1929091562519745 0.3295202125044007 0.8124587907101897  
0.2088146998810768 0.8257480553958922 0.3940209969323603  
0.6942419847243958 0.9738745662965269 0.8848762486198180  
0.6916078420597610 0.3259806015573376 0.8913798101681790  
0.2055605418635229 0.4817853528763451 0.3930136810818282  
0.2023124878838160 0.9682349823111164 0.8103897013509036  
0.7076231918882958 0.8198922204756820 0.3018370251478795  
0.5951315927891990 0.4655362240425274 0.4198114991190875  
0.3055502660471168 0.3389897087567432 0.9109768299908697  
0.0959388907343535 0.8338487097057682 0.2943706049824914  
0.8111285964425017 0.9756684566207308 0.7922256354472077  
0.8033599454565591 0.3349849545180302 0.7880744390234834  
0.0945248186780343 0.4670269118768131 0.2901861214696623  
0.3175929145343310 0.9851636006560769 0.9019080512293925  
0.5985508068047085 0.8394719511449711 0.4044285961874270  
0.5962822250795942 0.5415514662236284 0.2538402623700401  
0.3005713833768938 0.2729457886523040 0.7355212753788378  
0.1045814659803515 0.7589768418831742 0.4622629614556620  
0.7918117261648527 0.0450543608432722 0.9621911156603276  
0.8007901862523861 0.2623549634764364 0.9569216615831002  
0.0954333758904026 0.5397166967024259 0.4598262669532100  
0.2903417207021892 0.0542542611019526 0.7360640801016842  
0.5962900642430317 0.7578079469564509 0.2464962506111073  
0.6062714010865771 0.4067105485351659 0.2417593879247868  
0.2895444064245058 0.4082903647405090 0.7422752529384279  
0.1074378412623759 0.8940469264693871 0.4713363223146363  
0.7986628708271799 0.9099054361923052 0.9617384007665487  
0.7919797578398285 0.3972577310315411 0.9627485468233010  
0.1087300201141567 0.4049500854890001 0.4661127193277759  
0.3143621534128286 0.9229880708168097 0.7237753209820814  
0.6098268658638357 0.8910758549366421 0.2183114714130574  
0.5230599052092133 0.4474638047525923 0.5820783715663834  
0.3779990002776080 0.3550278853783642 0.0744499871838415  
0.0224354558674604 0.8593810046448048 0.1339463742996848  
0.8779352091796110 0.9419347458237896 0.6300545290758782  
0.8771371720706647 0.3603570942460070 0.6291106565707696  
0.0180010656642552 0.4434615536707249 0.1318222845325944  
0.3716793850645541 0.9439976541077754 0.0745569973474030  
0.5244750492319867 0.865455217064532 0.5624219744139182  
0.5196047232158768 0.3536432155631519 0.4363765304513711

0.3930164001656661 0.4414163940697416 0.9208589472908422  
0.0172710444455110 0.9428935113418606 0.2929844316638636  
0.8806243996246396 0.8600041152024476 0.7904513368099619  
0.8818187106713159 0.4442247949841417 0.7876158555959015  
0.0154716906250510 0.3588363948626581 0.2905774521455548  
0.3499237763964286 0.8576591585307889 0.9230417701681518  
0.5189416892999177 0.9465626635183118 0.4007653166457488  
0.4648719805557753 0.4721832456998965 0.4055039547017607  
0.4343470332121950 0.3153657141314428 0.9020224053100233  
0.9663227737766746 0.8204922711006893 0.3078202278407794  
0.9436520455629656 0.9762826026350577 0.7958094569438487  
0.9340651266010005 0.3229374436334451 0.8016165615352115  
0.9653751373891761 0.4815025625324783 0.3081491053879253  
0.4458608946190152 0.9500882698748981 0.9135421454466801  
0.4686690062951322 0.8245253164284504 0.3899016656833493  
0.4824085527338824 0.5076227823398808 0.7479202227038479  
0.4276072665796281 0.2769068680341027 0.2176715784232365  
0.9783461728722611 0.7783143354823082 0.9909289321567699  
0.9185243636568889 0.0261462819076106 0.4889014844549052  
0.9141977369470978 0.2764817283829551 0.4859193058327181  
0.9731224925179562 0.5249237143223399 0.9886422643616565  
0.4144949911145056 0.0251563919110519 0.2153253684638214  
0.4956974360310463 0.7615997555435025 0.6814736416860880  
0.3952670384859704 0.4392704721854185 0.6288585533274093  
0.5042805862388561 0.3680723500195109 0.1299526003146331  
0.8962258439519708 0.8653515568794963 0.0782127378361289  
0.0039510402128175 0.9401033181331069 0.5732472802299273  
0.0023518767197587 0.3619986283696183 0.5672920832038812  
0.8913940280458255 0.4386559557184606 0.0781862239247839  
0.4985159425733007 0.9360982100429953 0.134852780772947  
0.4000873150591597 0.8513796916168526 0.6201311468020617  
0.4838184229986444 0.3753558569812846 0.7375492014871230  
0.4061902782606221 0.4067266602701379 0.2532322893454593  
0.9914597627603909 0.9096912060479675 0.9549058448616973  
0.9085625689819596 0.8947467272460137 0.4505751473804982  
0.9054016206437276 0.4083133313339781 0.4497959179869235  
0.9861697824809436 0.3928146608794825 0.9542879563367425  
0.4001564709502587 0.8937182434216988 0.2525353961416071  
0.4926911439121752 0.8849557755774614 0.7538425815261330  
0.3059902820020156 0.5339066448420831 0.6787964695008293  
0.5926486292718764 0.2775884223218850 0.1978068207378570  
0.8104338327005133 0.7781589860109064 0.9984952704434573  
0.0934380182861205 0.0261772868963333 0.5001645363636718  
0.0940861098741412 0.2744540447823030 0.5055304288538388  
0.8034400675272955 0.5272373624767579 0.0054853991893403  
0.5877133256090319 0.0234013834518297 0.2051697553875095  
0.3015820947058487 0.7885350845962230 0.7190813659807451  
0.2732828498042105 0.4366693263653244 0.5509817212117259  
0.6268880874957368 0.3647777642825344 0.0557893312038726  
0.7702830703090578 0.86427202147165555 0.1399290970162320  
0.1260943914982268 0.9447889446025908 0.6509745491686240  
0.1226128368598127 0.3611902035763523 0.650977763430076  
0.7661999569649124 0.4396402644593212 0.1457576483546725  
0.6149109116631003 0.9526131670956074 0.0422698078166147  
0.2742728897485235 0.8610936909947847 0.5592630478726083  
0.3345375820714600 0.4776142367061445 0.3860345759933647  
0.5625625775244528 0.3352623485778262 0.8880593639256091  
0.8370869704787942 0.8387948617175566 0.3048696435548787  
0.0732707528604629 0.9715803463129294 0.8286753421168084  
0.0637088300009297 0.3281257337674893 0.8222896425821616  
0.8356336650480078 0.4680620773187825 0.3061035811725199  
0.5683947911873787 0.9706074982456528 0.8554178883491818  
0.3375721593035777 0.8250114733109933 0.3931149375017845  
0.2660790880574185 0.3616488647686497 0.3850673740529318  
0.6340530518414500 0.4477228951469541 0.8976187491183342  
0.7557070216553289 0.9442920799714495 0.3015558427002535  
0.1349498167247210 0.8544790128146377 0.8012063662853983  
0.1260670876881415 0.4453181513689060 0.8087736003665762  
0.7599890395899078 0.3574847636722913 0.3068138053804116  
0.6316774417920675 0.8565553009608480 0.9030803836256918  
0.2736310348589637 0.9435371591084754 0.4003995714917445  
0.4079781102021748 0.5435489087079695 0.2643634649278171  
0.5055237742939336 0.2468738364549536 0.7686293046953298  
0.8890930010398983 0.7606926343516280 0.4406540874692605  
0.9975899244404115 0.0452945277994785 0.9429255529209014  
0.9939317292525404 0.2572909983385841 0.9472916348136089  
0.8905508642192423 0.5432616470149582 0.4425611348106816  
0.4691727347241200 0.0191360689347008 0.7484594212196340  
0.4020080849300011 0.7574456531430137 0.2542156503871960  
0.7022037810059252 0.2370847818977506 0.2982241369184172  
0.1860213498331802 0.5653018437432936 0.7900118099901906  
0.1965907434900681 0.0514584453460855 0.3772458173311817  
0.6991519342407991 0.7427007364929969 0.8982275246421275  
0.6934133085647955 0.5674081107978608 0.9051060896879590  
0.2066787278008625 0.2432450786966986 0.4070631387270963  
0.1906879087604502 0.7326006680554200 0.7865514692513167  
0.6982664798224817 0.0642990125826789 0.3016587541275609  
0.5886987666533268 0.2442759006885793 0.3938769839817858  
0.3063451990572669 0.5433027178142736 0.9003567840645444  
0.0768817378679217 0.0622570454447423 0.3065816998845921  
0.8129368912411412 0.7450772071981683 0.8030561445922757  
0.8043592649796820 0.5527597390169673 0.8069602959100033

0.0926280570446618 0.2495532336026140 0.3081858257691473  
0.2976360512925541 0.7374981116029227 0.9044636755733377  
0.5848274876493446 0.0621959969318307 0.3988353022177249  
0.6052346833786327 0.1513161513956071 0.2508079597154982  
0.2926262968389401 0.6541133365946876 0.7476866404416117  
0.1161516246918987 0.1507933831657236 0.4430231472564726  
0.7920671031597033 0.6521169142546290 0.9439078964093709  
0.5289756324262332 0.2525934798945903 0.5700727286437340  
0.3735730571551156 0.5259173502630643 0.0732502394324847  
0.0165405031630820 0.0266464944313262 0.1371564480776623  
0.8797716126048414 0.7748090965971746 0.6370682197959809  
0.8716301039209318 0.5319038102643209 0.6382920321977026  
0.0233381873141904 0.2713022600336885 0.1404504489506161  
0.3737416561629858 0.7662513023662126 0.0611899433406998  
0.5151974559660660 0.0255600694808882 0.5622509968128384  
0.4559268923509720 0.2382287804240427 0.4051682003132095  
0.4362218652111254 0.5679428159082442 0.9116578051935514  
0.9455989238363649 0.0565372225254051 0.2977880292409120  
0.9453789999218171 0.7430954069244754 0.8024223871557141  
0.9354540145423205 0.5662176668306040 0.8052401859667412  
0.9606322464972940 0.2375114013901283 0.3076384459105896  
0.4285303751986990 0.7530234866265619 0.8775755845000701  
0.4528619408182024 0.0627999917961388 0.3984395040572103  
0.4969138832367542 0.1377437350341888 0.6635957988232888  
0.4012169219757200 0.6481560335055312 0.1443012993165803  
0.0017412602184654 0.1504938520300838 0.0650576303601129  
0.8827466602878637 0.6526526471913967 0.5558769589651870  
0.4068435249645925 0.2357640673272500 0.6342376842231944  
0.4979912207030063 0.5568816978562708 0.1215886365501030  
0.8989048156195070 0.0670337037431093 0.0718215920816266  
0.9918235843396370 0.7283279636154230 0.5553074351609080  
0.9886876028678038 0.5734126204270914 0.5672636033223559  
0.9007987008888277 0.2375780621007674 0.0848419829914444  
0.4973180353825405 0.7388051596606127 0.1162617112391363  
0.3918056117141630 0.0673016870333975 0.6056210249913879  
0.2971417252027843 0.1617265709833470 0.6209489361654936  
0.5950118321864001 0.6484604359767878 0.1348671878243775  
0.7976186211679654 0.1540480069847690 0.0761290768799454  
0.0982814752124291 0.6487569940435697 0.5739917503350028  
0.3015266690842733 0.2825725888154860 0.5365079160763493  
0.6170189994629890 0.5268566859100096 0.0564126019931624  
0.7881263981011755 0.0332196042536745 0.1622546738836998  
0.0944683547415711 0.7700256217814667 0.6616265166673387  
0.0942947402886089 0.5258257103712846 0.6589793294461835  
0.7846640799451368 0.2769702246188395 0.1533380592661475  
0.6184238468931454 0.7683724004263065 0.0508077427895502  
0.2722209842505965 0.0417370615846650 0.5383834080882082  
0.3301556466929459 0.2476588524753338 0.3468205405904202  
0.5657582536126852 0.5633113883895691 0.8770045031330976  
0.8213955188729437 0.0544732664524086 0.3571229428284575  
0.0707221083433608 0.7431630760429716 0.8568562819594541  
0.0626076651795935 0.5587334612449609 0.8490283039013231  
0.8300971473153748 0.2450780221791290 0.3368483485911330  
0.5704288553731734 0.7387664730848288 0.8671907439318265  
0.3250484208999946 0.0629568267002445 0.3546742298840871  
0.4055953460209099 0.1519734970871842 0.2697498645128809  
0.48909272694116146 0.6421644811731538 0.7648983218466390  
0.9009076983912065 0.1501718554512005 0.4271184902638557  
0.9882288855862522 0.6521364161534583 0.9355268564453743  
0.4260137547388290 0.5844934015574081 0.5929513808253170  
0.3859179571342244 0.7027697112286753 0.6050092088625593  
0.4664755013951606 0.6796006314292192 0.4635152885021703  
0.2365862895452729 0.6529038885874658 0.5458012750589514  
0.5616603680031921 0.6314455123917934 0.5945914271489340  
0.3403217893747437 0.6297415951206737 0.4350118147992230  
0.6257828633026340 0.4732904122427650 0.3065488404040723  
0.2723709349563139 0.3371585398094992 0.7989390828044506  
0.1289965825220531 0.8283439723033953 0.4064021065279615  
0.7734677569734003 0.9762534102615067 0.9012284575981269  
0.7717245803261932 0.3295090404282914 0.9010329895212319  
0.1255980467530404 0.4732343943474462 0.4034162533549675  
0.2806945016434106 0.9818061548087833 0.7926073949939944  
0.6275966024244845 0.8275759869376500 0.2910722078101558  
0.5256999808631291 0.4337009034760088 0.4618791301620115  
0.3777450574308424 0.3633471127970468 0.9523607664779944  
0.0253044726773460 0.8645448239066484 0.2558872255387961  
0.8781768336876642 0.9383955296483841 0.7522452694290843  
0.8741878309072357 0.3658636844506309 0.7508711307362416  
0.0230433398268115 0.4371867132137948 0.2534529350203371  
0.3712977044159040 0.9338323996489533 0.9531526999510602  
0.5269902650743825 0.8690024414267472 0.4407699819310410  
0.4702633989783147 0.4439873877301339 0.6747991960173036  
0.4290938746631429 0.3517871260454222 0.1686693612083493  
0.9720157607182555 0.8534785897038569 0.0386280489526406  
0.9277688035061341 0.9507014223032463 0.5349142565172501  
0.9254995682038060 0.3515026832754646 0.5322532151090946  
0.9670780480584799 0.4498940316654023 0.0370671676441031  
0.4220414362280044 0.9495313442677831 0.1695419843133025  
0.4771068359620551 0.8395872138469153 0.6540257729838922  
0.3171921144253249 0.4545143262941512 0.6502291209869905  
0.5821645572735991 0.3539312197929735 0.1558294100368829  
0.8192385103602744 0.8538572996951700 0.0442914319316091

0.0823697311145137 0.9517173618634085 0.5491255781386626  
0.0813130427186225 0.3505486211936689 0.5477636072847706  
0.8137833746365871 0.4509197930070251 0.0483959249916376  
0.5772697138797095 0.9506904921659822 0.1501451278539043  
0.3232305152083336 0.8549868432452618 0.6565299644972595  
0.2697375260625665 0.4381485468339653 0.4289469260932511  
0.6286184195143194 0.3689878558688546 0.9332426700614500  
0.7679530415703255 0.8675172300654482 0.2621988632806403  
0.1339341704399236 0.9342823504767476 0.7720291073992955  
0.1261386230493708 0.3670406896213479 0.7732971883883805  
0.7669914798330352 0.4353000210218955 0.2682691146686873  
0.6267819082690874 0.9370820943097075 0.9229712610506222  
0.2740125522815773 0.8649834388518524 0.4367991755703573  
0.4044825935366719 0.4724438658829184 0.3255044010502120  
0.4965035151241216 0.3193625012726130 0.8242629875083215  
0.9004764151302521 0.8298143386602811 0.3770462800300928  
0.0013148081021042 0.9745572023166351 0.8813302079539392  
0.9944165998976199 0.3267111166695446 0.8825609605943967  
0.8996178076499010 0.4742617840180052 0.3779392923971770  
0.4938950298538609 0.9556944976209930 0.8160796199139463  
0.4023016960700644 0.8259007279141426 0.3212444184205602  
0.6225044210361069 0.2282157766136745 0.2849844709252835  
0.1213918071743417 0.0724033092951724 0.4077126818916706  
0.7775579117653600 0.7301865183588749 0.9118038668697594  
0.7732122076695873 0.5745933242288853 0.9159838907640425  
0.1276035882913254 0.2298249431374201 0.4155727615100869  
0.2711545152728256 0.7289887611203415 0.7890277654029141  
0.6191168308530055 0.0743434966047515 0.2885069761351671  
0.5231427519212026 0.2721371356825979 0.4512942681082899  
0.3747652971500348 0.5199361866340773 0.9495877354240877  
0.0143202153559755 0.0219549138942976 0.2594616435439297  
0.8794806596942658 0.7806684271087846 0.7593484480881698  
0.8732179587807785 0.5237680886943050 0.7603530221401511  
0.0235263388439508 0.2790984783091300 0.2625460989110170  
0.3651631948123203 0.7774624743409682 0.9398802976799936  
0.5184245570601671 0.0244575609993359 0.4398105450456938  
0.4839113886210915 0.2182473412988330 0.6586061832306368  
0.4203638181925190 0.5692520596184986 0.1489874041737255  
0.9780596237399088 0.0727610264661415 0.0538895264429335  
0.9114898754690574 0.7289827613638417 0.5478058989320054  
0.9090118202669885 0.5752723777410752 0.5512298322922053  
0.9792306812853691 0.2288557977728558 0.0593106381309426  
0.4192415960296306 0.7278572265371573 0.1431892544484206  
0.4679631841638718 0.0625192404340564 0.6453626809626620  
0.3266436417488935 0.2377969536128354 0.6323655368937282  
0.5763264237172627 0.5690865562064642 0.1415905942972053  
0.8191926941613743 0.0750564627131631 0.0680922013770705  
0.0714745658477991 0.7273879601294174 0.5635943364794197  
0.0685420623740853 0.5710140920375222 0.5656420875941688  
0.8213600346937808 0.2322534947934521 0.0668223540215718  
0.5761388937662766 0.7283439384353213 0.1355974667693223  
0.3134630378160084 0.0812518935307698 0.6258181872613660  
0.2761375585350581 0.2831869071434444 0.4197966964199851  
0.6267391958626277 0.5260174790147144 0.9338550745835954  
0.7665661572586210 0.0243441429865145 0.2798571040195173  
0.1227905748193788 0.7751740718185245 0.7769386546816748  
0.1188133125256424 0.5246135046661081 0.7776313182577604  
0.7695311421328583 0.2787811870321080 0.2742286006995471  
0.6278266067438647 0.7760179058550094 0.9280855353774634  
0.2676815271565561 0.0245844705142679 0.4182527586205192  
0.4048366495402791 0.2290829480969329 0.3107169861989840  
0.4928141890775643 0.5699806271503977 0.8246562426877690  
0.8964207386520631 0.0716056459342682 0.3926853148061306  
0.9958089481874449 0.7295038897804571 0.8964745343883225  
0.9903413614224674 0.5746941604052294 0.8948063190779414  
0.9009745573908599 0.2280770652317669 0.3890881619828832  
0.3989208346745932 0.0746768190979443 0.3093437391285355

Structure TS CH4/22v→25 S=8/2  
1.0000000000000000  
20.1473052208878016 0.0000000000000000 0.0000000000000000  
0.0000000000000000 19.7681594983396991 0.0000000000000000  
0.0000000000000000 0.0000000000000000 13.2309279702280005  
Al C Fe H O Si  
2 1 2 10 198 94  
Selective dynamics  
Direct  
0.2751267677213463 0.5715789310648844 0.7864943738752714 F F F  
0.4933783714820805 0.7300207547922639 0.8101417763876952 F F F  
0.6284995034658676 0.6664836474978547 0.4361808877149980 T T T  
0.3385670648767318 0.6282974207264763 0.5987212678073119 T T T  
0.4706180954537415 0.6659653390299626 0.5969710553835869 T T T  
0.1951852013751444 0.6477322963998615 0.5882813048389591 T T T  
0.2320722669425748 0.6537545288891156 0.4830473209753618 T T T  
0.5844849837132072 0.6485000769575155 0.6864956255992509 T T T  
0.5943067559197085 0.6401670517240090 0.5668669092385463 T T T  
0.3302310483523182 0.5700192779119597 0.4068006021072784 T T T  
0.3711337342427462 0.6373556145921131 0.4029507680310824 T T T  
0.6539935144574480 0.6229509844040545 0.4699528731486453 T T T  
0.6470189471945711 0.7163908454345626 0.4576095278146518 T T T  
0.5496255954611338 0.6766341323308898 0.4629638964173921 T T T  
0.6164361377145422 0.6594734354522014 0.3565881691263429 T T T



0.7058797581888996 0.4776762274788737 0.3155157152321948 F F F  
0.1938937427405989 0.3290221525913708 0.8112439275856147 F F F  
0.2081720859726559 0.8249694378321237 0.3937868688149209 F F F  
0.6943466400310854 0.9735478654658749 0.8814390353904571 F F F  
0.6926541867517244 0.3263521923827284 0.8918837849046994 F F F  
0.2053129828269391 0.4828476489647429 0.3963508996497040 F F F  
0.2026044713144799 0.9693730616404039 0.8083708436601285 F F F  
0.7061320414487469 0.8197749347104875 0.2984959074027387 F F F  
0.5940049671837286 0.4672047299905771 0.4191079816625276 F F F  
0.3054017119224213 0.3385729732872704 0.9117957911784771 F F F  
0.0948323848399824 0.8318084135069128 0.2949126085412317 F F F  
0.8122497627111613 0.9757573402753223 0.7921508752346540 F F F  
0.8046019765794483 0.3342796359055811 0.7891293981744099 F F F  
0.0950831397928980 0.4675258557189963 0.2907597954792820 F F F  
0.3179258510575309 0.9871946647651413 0.8999675242997327 F F F  
0.5975010687442222 0.8398691517566661 0.4007920172758759 F F F  
0.5978539803278409 0.5406813707713596 0.2502647460585692 F F F  
0.3021487156579141 0.2729796403812088 0.7360331817646397 F F F  
0.1050650382087710 0.7573458270079954 0.4631035814240860 F F F  
0.7910283451403188 0.0442446873116609 0.9626018600246340 F F F  
0.8012460600120335 0.2618526402121546 0.9578364897085478 F F F  
0.0947925656573858 0.5410506065636085 0.4595591872504698 F F F  
0.2907587243564009 0.0547556490121224 0.7339673475992043 F F F  
0.5930749870077392 0.7607060217977093 0.2407183797665766 F F F  
0.6050837727274043 0.4058739728455407 0.2436526241860051 F F F  
0.2906583286535280 0.4085989239958678 0.7427781228521866 F F F  
0.1068793513557011 0.8926368779651099 0.4712056970714542 F F F  
0.7982175312165936 0.9091615096103283 0.9603352086793322 F F F  
0.7936070573325935 0.3968959247755564 0.9635436282439045 F F F  
0.1079276389650445 0.4060797286897611 0.4672515052388064 F F F  
0.3144734727328213 0.9229361345165046 0.7230040895474872 F F F  
0.6100209767755160 0.8934789818293822 0.2162267815240710 F F F  
0.5247885057137722 0.4501423475344382 0.5844432121208953 F F F  
0.3784540327346022 0.3530936195881225 0.0753858382087884 F F F  
0.0218592424450037 0.8578300534044558 0.1342024235822308 F F F  
0.8780169651074488 0.9405947345125441 0.6300014412146453 F F F  
0.8774782330787403 0.3605713111006565 0.6297539465218733 F F F  
0.0188221264156425 0.4441606659954402 0.1322639736245605 F F F  
0.3716341544163768 0.9476005955890017 0.0738091340548195 F F F  
0.5269138741320276 0.8641380926221203 0.5623473003594199 F F F  
0.5204973778638617 0.3542322546737253 0.4416544665702276 F F F  
0.3916262171233882 0.4413894829093152 0.9244391195120016 F F F  
0.0172881502953501 0.9417014690827799 0.2926037224432889 F F F  
0.8804669860872991 0.8591987704789616 0.7910658763639660 F F F  
0.8821993220158291 0.4440166873128177 0.7890534418335733 F F F  
0.0167637862005421 0.3587369709176613 0.2899021967810924 F F F  
0.3438504677471101 0.8593058666938944 0.9282055422721953 F F F  
0.5191105071181781 0.9474229554054574 0.4022937063082068 F F F  
0.4628672271511292 0.4706385340792778 0.4095615621243383 F F F  
0.4341133833808897 0.3163792051275820 0.9008141287456937 F F F  
0.9650994513233044 0.8195935146350166 0.3076197739951709 F F F  
0.9447621721513286 0.9749851941545487 0.7949559047075070 F F F  
0.9355582816363324 0.3231117619681498 0.8012968690263307 F F F  
0.9657977172577858 0.4809182081355345 0.3090413008630435 F F F  
0.4447143567760676 0.9467457661027794 0.9114596965327166 F F F  
0.4665775779866692 0.8269340283612578 0.3924246533873301 F F F  
0.4758528480711064 0.5109746906776635 0.7475195329470523 F F F  
0.4298620999450407 0.2773599862761316 0.2195874214619451 F F F  
0.9791641669112252 0.7775298296510940 0.9897145252714807 F F F  
0.9181575267418580 0.0252697605491008 0.4889213339795617 F F F  
0.9140671350921252 0.2754311804010499 0.4875287047271613 F F F  
0.9766240097370371 0.5247927194430133 0.9867290900848289 F F F  
0.4161271639439690 0.0272770497377337 0.2146587242451545 F F F  
0.4944764005592859 0.7610541162198317 0.6826166385778620 F F F  
0.3976371658875024 0.4343062196641014 0.6293661925324230 F F F  
0.5054869925127363 0.3670690592710741 0.1272255137042322 F F F  
0.8958119607883717 0.8639438008894302 0.0775019815844544 F F F  
0.0035849419295175 0.9390580688736563 0.5719520914026361 F F F  
0.0024294847735646 0.3610293667656777 0.5676600213905232 F F F  
0.8924279524974352 0.4408809199976957 0.0781261641567141 F F F  
0.4988788772130164 0.9381765549310188 0.1312905443958030 F F F  
0.4017484602853187 0.8534811981888950 0.6186692286118856 F F F  
0.4903634152978000 0.3791501057204201 0.7431757937721954 F F F  
0.4084733009096269 0.4074188468908133 0.2517831457473036 F F F  
0.9908662878390331 0.9091226346682504 0.9557925580756788 F F F  
0.9073713399505223 0.8941675997444776 0.4496348783406106 F F F  
0.9056082180253426 0.4069830845542484 0.4493544745770919 F F F  
0.9863921122823172 0.3922494203918845 0.9557417183081540 F F F  
0.4014470518080770 0.8956671649517531 0.2504719793615635 F F F  
0.4951346765443105 0.8842615326503775 0.7528375339185658 F F F  
0.3128649533675869 0.5336041608426996 0.6771685337800406 F F F  
0.5943759911165074 0.2774476715436975 0.1967633093448811 F F F  
0.8085925936582044 0.7777983984142907 0.0002970704574636 F F F  
0.0938978850925878 0.0249951301122380 0.4997499542825921 F F F  
0.0954928188669655 0.2750144861720614 0.5053568042541698 F F F  
0.8020809508936537 0.5271478396425877 0.0077440831350231 F F F  
0.5872170106290540 0.0252642411951314 0.2036635489914929 F F F  
0.3045707463834617 0.7884052464663469 0.7160143244539086 F F F  
0.2756113936542377 0.4367965080346963 0.5512634420486791 F F F  
0.6294200879614351 0.3662465773352963 0.0573189052342897 F F F  
0.7700725984694330 0.8661461297447914 0.1395806475345935 F F F  
0.1254634730526760 0.9435497565927733 0.6507115280100706 F F F

0.1225354880688272 0.3614981791968361 0.6515329360827664 F F F  
0.7671386919788077 0.4381695523748164 0.1467424220110232 F F F  
0.6160501568969252 0.9547188793053394 0.0405220861810491 F F F  
0.2759819715807481 0.8614947283064964 0.5567645405706330 F F F  
0.3331907121310849 0.4763946828094916 0.3827498597200574 F F F  
0.5633521099036116 0.3310260425734697 0.8944171310804379 F F F  
0.8357183720157053 0.8372072219564970 0.3046439062631521 F F F  
0.0740713527995496 0.9682327044722072 0.8298979158826469 F F F  
0.0650279164577370 0.3290032795037021 0.8243184318007124 F F F  
0.8358441794938898 0.4679424237936942 0.3068151457851371 F F F  
0.5673923441436699 0.9720508682350584 0.8555414753592103 F F F  
0.3360293384673483 0.8257230906834607 0.3868668175187295 F F F  
0.2626626815071731 0.3611861291932001 0.3863620009238460 F F F  
0.6314104393865989 0.4463804719502917 0.8955110844723748 F F F  
0.7560246318191446 0.9440447035144928 0.3029987354577770 F F F  
0.1397853094166592 0.8531677084011733 0.7998122578906148 F F F  
0.1288296356094065 0.4457332583261433 0.8090759535762899 F F F  
0.7614000602117983 0.3566010503548611 0.3081292334055235 F F F  
0.6300685933517158 0.8574604544677698 0.9017464315518424 F F F  
0.2714234876820996 0.9437689683850934 0.3984037573949024 F F F  
0.40874113180919697 0.5438493227101233 0.2669519461058485 F F F  
0.5052259788196736 0.2483011050654369 0.7684393776070166 F F F  
0.8879957988287188 0.7599982484646759 0.4410643218377075 F F F  
0.9988362821700179 0.0443242292414183 0.9421374988579601 F F F  
0.9944462267679981 0.2569650852157892 0.9474968856825399 F F F  
0.8908455734661089 0.5422004655234360 0.4437511375850534 F F F  
0.4673310257690773 0.0175377090617772 0.7473591285157966 F F F  
0.4055462687885125 0.7592297943590722 0.2527325281798483 F F F  
0.7030911508739450 0.2366573685960773 0.2996824579027688 F F F  
0.1903958277022539 0.5646615156303199 0.7820999271017897 F F F  
0.1964742184172081 0.0531566012137716 0.3766160976154893 F F F  
0.6999534592583743 0.7450739282533192 0.8922449689790781 F F F  
0.6936702290094559 0.5645790812008897 0.9015568252620909 F F F  
0.2076080238859603 0.2404964413944768 0.4080179962571577 F F F  
0.1931060213966660 0.7304037065917584 0.7793830995109303 F F F  
0.6984021692729954 0.0640609632041915 0.3000921779474695 F F F  
0.5893102703393396 0.2459118451360425 0.3936967871802608 F F F  
0.3087270540206219 0.54561121529558189 0.8994566992894875 F F F  
0.0763022183597641 0.0613543921960584 0.3067023188720697 F F F  
0.8169703591705755 0.7420459151234340 0.8062127000388841 F F F  
0.8077627666128322 0.5545220037598924 0.8102506739933943 F F F  
0.0939448674995518 0.2496249327319191 0.3081642635781634 F F F  
0.2982107824082831 0.7372095875312610 0.9013577125106877 F F F  
0.5853694602884261 0.0625459839556939 0.3985124449034956 F F F  
0.6054950033939264 0.1520740822187818 0.2516556470268867 F F F  
0.2985112559327305 0.6544062262062909 0.7437989499738151 F F F  
0.1144376304158783 0.1504657442325197 0.4434354223148631 F F F  
0.7885399552013013 0.6519891894744418 0.9476912606870656 F F F  
0.5304424909797945 0.2507656262959301 0.5709109435026889 F F F  
0.3717854645296654 0.5263740812271536 0.0769294319504041 F F F  
0.0164946196868954 0.0257716440281541 0.1368576715133614 F F F  
0.8798480698898601 0.7740633727183024 0.6376508401609584 F F F  
0.8713558079785244 0.5314531855681892 0.6395188929426467 F F F  
0.0239522801957293 0.2702379982151797 0.1408150361025022 F F F  
0.3713175495151475 0.7654264693360844 0.0618253209555277 F F F  
0.5159923553270716 0.0272182464800395 0.5627153475521425 F F F  
0.4566649795791875 0.2388693893689791 0.4070262722155746 F F F  
0.4394230911046790 0.5654060481211900 0.9208350322892329 F F F  
0.9450275935741814 0.0548824984117999 0.2973124372046101 F F F  
0.9495107148523587 0.7443749015500956 0.7996966127859153 F F F  
0.9395520467849110 0.5644148482287505 0.8028259055999456 F F F  
0.9619934096210585 0.2376505678075276 0.3093818917431648 F F F  
0.4289114540279755 0.7614250142618459 0.8801147488650685 F F F  
0.4532694761692824 0.0637633168341480 0.3987214076911272 F F F  
0.4961816839333082 0.1376172273427727 0.6681549082996199 F F F  
0.3998590231622714 0.6485483846454656 0.1477742559886366 F F F  
0.0021692712538837 0.1496395949432170 0.0643029440667391 F F F  
0.8829233684284219 0.6519465058628953 0.5563601614578388 F F F  
0.4074594092026089 0.2360432953753104 0.6325284677847947 F F F  
0.4972377615524053 0.5579903701814146 0.1231600393515109 F F F  
0.8993042469810746 0.0660365110178418 0.0694981129378789 F F F  
0.9915646551497517 0.7283701021303699 0.5541306241981445 F F F  
0.9884858713240590 0.5722100627418243 0.5690751872101671 F F F  
0.9014092813085952 0.2367012300465063 0.0853687118804132 F F F  
0.4964871278408935 0.7368821475059875 0.1083507678687994 F F F  
0.3921601995012551 0.0680854114288749 0.6037129404883430 F F F  
0.2974469329910008 0.1622709332740371 0.6192827534306815 F F F  
0.5952656208465257 0.6486720829282362 0.1344405368724395 F F F  
0.7982041547919678 0.1531922080801067 0.0762716677718700 F F F  
0.0972958898711340 0.6484191452419310 0.5781615840631318 F F F  
0.3012010684363986 0.2834991466715167 0.5373236443077474 F F F  
0.6145735966304500 0.5276443614683402 0.0517623848961932 F F F  
0.7893724064986429 0.032322523228495 0.1627301554666403 F F F  
0.0936406775390140 0.7702442917240830 0.6622255126783330 F F F  
0.0951236603294134 0.5244442950118327 0.6581732955448771 F F F  
0.7853255243742439 0.2759939060621051 0.1542097892280552 F F F  
0.6187074497996861 0.7670905476603593 0.0462724267376444 F F F  
0.2726097125048952 0.0418119816490190 0.5368655258546298 F F F  
0.3311365337262302 0.2502451948169409 0.3475739219787712 F F F  
0.5665620512904681 0.5634598195110385 0.8692066664488962 F F F  
0.8210781913918552 0.0549298929329751 0.3576726344792149 F F F  
0.0743503753730579 0.7432014436869707 0.8583398363509858 F F F

0.0672355033598393 0.5602550384993066 0.8482488613384476 F F F  
0.8312233973111702 0.2438535135411968 0.3370502713934940 F F F  
0.5713373973538367 0.7385944083557661 0.8620924934679763 F F F  
0.3253403214186292 0.0621286457375803 0.3532863297172284 F F F  
0.4049830658370936 0.1532080623759242 0.2715795899336229 F F F  
0.4808084107483097 0.6446314713284096 0.7748752692707797 F F F  
0.9024082161182818 0.1493045734007197 0.4271805736443497 F F F  
0.9903311589705197 0.6519563311011964 0.9327397018318280 F F F  
0.4338695345589351 0.5890116809239482 0.5833412212406543 T T T  
0.3907946845873846 0.7046858535211089 0.5861930887470688 T T T  
0.4986479207873291 0.6905895430812763 0.4775860789501724 T T T  
0.2387629043952827 0.6532790570341811 0.5559815430705225 T T T  
0.5648610567262986 0.6294690120530451 0.6252166449835042 T T T  
0.3318446741679502 0.61166386214281577 0.4333590624137348 T T T  
0.6256278692765349 0.4730724099270418 0.3061980933360502 F F F  
0.2733412004799547 0.3371532353467046 0.7990126991743267 F F F  
0.1284147160959961 0.8268183124374673 0.4066072496723905 F F F  
0.7734458040184293 0.9758379137529545 0.9001718147706441 F F F  
0.7727543858935348 0.3292624120427590 0.9019549163618876 F F F  
0.1251562064969178 0.4741975696969476 0.4045176712600096 F F F  
0.2810244367471952 0.9825241788572114 0.7908088617929181 F F F  
0.6262937106191444 0.8288078136258008 0.2872491316606656 F F F  
0.5257664221438247 0.4347465636010881 0.4644276519928923 F F F  
0.3774788274470069 0.3629618367115484 0.9535532805800599 F F F  
0.0245574837877101 0.8631457023855731 0.2561075042623102 F F F  
0.8787701448234415 0.9375111891361954 0.7521947710208821 F F F  
0.8750729232390029 0.3657638730305663 0.7515957687714376 F F F  
0.0237348456046931 0.4373090801379220 0.2537865654687224 F F F  
0.3698229020342652 0.9349086201976462 0.9530102477382485 F F F  
0.5269853839250445 0.8695340682291999 0.4406844620869634 F F F  
0.4718448559017006 0.4450872470372360 0.6769251739471045 F F F  
0.4306823895684673 0.3514659816370340 0.1682312970667326 F F F  
0.9717268200068787 0.8522953271105678 0.0385498389563068 F F F  
0.9272893341907604 0.9496540095654638 0.5342903562975110 F F F  
0.9255468886548073 0.3507432529178729 0.5327866601427900 F F F  
0.9682880992288290 0.4505261755664733 0.0370310859686711 F F F  
0.4228233724671711 0.9519327800578381 0.1677915569619799 F F F  
0.4783122455050162 0.8395066303910284 0.6530677795565509 F F F  
0.3203011504431714 0.4533802080045817 0.6503066867088592 F F F  
0.5832537579617920 0.3538199779791640 0.1555104611527298 F F F  
0.8185742496330803 0.8537937729659362 0.0440766127428489 F F F  
0.0820659471594567 0.9505859819533811 0.5486021591124697 F F F  
0.0814716584166604 0.3507353061871399 0.5481902807169092 F F F  
0.8143496379800368 0.4508899383486451 0.0493978355890334 F F F  
0.5775566678718036 0.9528320851882555 0.1477304683168370 F F F  
0.3246519332509692 0.8557615741256015 0.6542900814480319 F F F  
0.2689055405565242 0.4375063182724759 0.4296775918677440 F F F  
0.6291574798545412 0.3682194755574670 0.9344802742978331 F F F  
0.7672252440186256 0.8674537366842259 0.2618434801297909 F F F  
0.1351048285858951 0.9330498778454483 0.7714135305411389 F F F  
0.1272230673670265 0.3673585767169740 0.7737205222548624 F F F  
0.7674882464174786 0.4344173537585689 0.2692796719306898 F F F  
0.6265655770932241 0.9381131289867284 0.9212016756778638 F F F  
0.2733389432589135 0.8651420575077395 0.4342892394895230 F F F  
0.4049898829553769 0.4720494222501159 0.3258701986489001 F F F  
0.4979896008371512 0.3200008149874876 0.8264786102145791 F F F  
0.8992293232951454 0.8288338359855274 0.3768182661836832 F F F  
0.0019048677550373 0.9731962973376298 0.8813190526327048 F F F  
0.9952915597877592 0.3266533743815430 0.8833264096227040 F F F  
0.8999180439775643 0.4735092150447215 0.3785838321369326 F F F  
0.4935109526121195 0.9548416248119764 0.8153039326103197 F F F  
0.4025935029349483 0.8278721331686967 0.3191652294461633 F F F  
0.6233642113528859 0.2287983680116739 0.2854330840968302 F F F  
0.1208433321284801 0.0721594355214421 0.4076500865431001 F F F  
0.7774711073135165 0.7298959620878875 0.9122555918936257 F F F  
0.7728435228884578 0.5741956850405714 0.9173129821123567 F F F  
0.1280354104477226 0.2292085937051880 0.4159364045184404 F F F  
0.2738256742926382 0.7285597875593552 0.7848866412503170 F F F  
0.6193311658669316 0.0749510174787318 0.2880257337149743 F F F  
0.5240652452706343 0.2725669169415639 0.4530562701476413 F F F  
0.3750241363656244 0.5200990500067917 0.9532292704538108 F F F  
0.0140302179116318 0.0207641427607399 0.2591419988874790 F F F  
0.8814895233270832 0.7798368274427006 0.7598814670506897 F F F  
0.8750674193635248 0.5236770988428177 0.7615177854429973 F F F  
0.0246045935230015 0.2788800706397083 0.2627669646834718 F F F  
0.3631402431059101 0.7797310538200577 0.9411843904653381 F F F  
0.5188542022733600 0.0254613823728107 0.4402493779927568 F F F  
0.4841577521811544 0.2181702176274101 0.6593890386682730 F F F  
0.4197511690584719 0.5697292012683732 0.1513424468124356 F F F  
0.9785902701331395 0.0718625669971757 0.0528882502601036 F F F  
0.9111829631216679 0.7283926732677060 0.5478694332998160 F F F  
0.9089077949863906 0.5745022889686808 0.5522914213965677 F F F  
0.9798002506172310 0.2281006454592642 0.0593637034142844 F F F  
0.4191570856584050 0.7278572206430951 0.1416625142203429 F F F  
0.4677209313219066 0.0626964716224876 0.6458705546512249 F F F  
0.3272407117743228 0.2381566927380305 0.6320688225276214 F F F  
0.5759746512543273 0.5692834062120511 0.1397434034560234 F F F  
0.8195628619895956 0.0741506396799636 0.0678702486051677 F F F  
0.0710970056313514 0.7268057868115108 0.5645586907459119 F F F  
0.0683013364364982 0.5708346549222512 0.5667179483364251 F F F  
0.8219265287915078 0.2314340580692615 0.0674643464314428 F F F  
0.5753046183360837 0.7282655454938620 0.1309746210489919 F F F

0.3137912860612531 0.0817739820771095 0.6238646797260472 F F F  
0.2756555381063706 0.2829919640815035 0.4207260155289703 F F F  
0.6256085886753624 0.5253214947754543 0.9295760288876451 F F F  
0.7668548458558107 0.0239988861260443 0.2800414715824076 F F F  
0.1253153211494578 0.7742115384494781 0.7755724048476580 F F F  
0.1221551405646224 0.5247012360294718 0.7755402450182913 F F F  
0.7705659136896585 0.2779555493594756 0.2751822913800197 F F F  
0.6280881990203184 0.7765087534707149 0.9239231161531336 F F F  
0.2672498847728235 0.0248768406206921 0.4167616937002165 F F F  
0.4056645736086537 0.2302432788881035 0.31248344066398733 F F F  
0.4907721361322501 0.5711652810810719 0.8268472960332005 F F F  
0.8964764175169577 0.0708752270427695 0.3926784343537335 F F F  
0.9985943478831700 0.7295617796866125 0.8951125655554151 F F F  
0.9940139442288611 0.5743929119228071 0.8927071127215385 F F F  
0.9019803168763474 0.2273600515905372 0.3899558613349825 F F F  
0.3993397385927508 0.0755744292234155 0.3095953356269376 F F F

Structure CH4/26 S=8/2

1.0000000000000000  
20.1473052208877697 0.0000000000000000 0.0000000000000000  
0.0000000000000000 19.7681594983396742 0.0000000000000000  
0.0000000000000000 0.0000000000000000 13.2309279702280254

Al C Fe H O Si

2 1 2 10 198 94

Direct

0.2743892283334036 0.5718360014157693 0.7850355927603435  
0.4945407383897584 0.7303227289972831 0.8154895647510905  
0.2531919104140731 0.6227456817881170 0.2661226366266106  
0.3420762630171377 0.6194175364686662 0.5846558437756678  
0.4664386315498546 0.6700363482680080 0.6131427373684851  
0.2077200408647476 0.6418319188863064 0.6115345993288702  
0.2274658762196873 0.6330949817846916 0.4968853476816953  
0.6021084623516347 0.6681083312205256 0.6530987326700538  
0.5929815671204335 0.6667980658676415 0.5339658194773059  
0.4530052763180364 0.6483462677726873 0.4167093460593334  
0.4771200283734431 0.7238505252300711 0.4235528950841034  
0.2763043820765912 0.5730243681985999 0.2749842779602373  
0.2893853717190598 0.6622030928089484 0.2846535466899975  
0.2103563193926387 0.6263280897012765 0.3171476715457495  
0.2359774288641036 0.6291168853943204 0.1881186364563355  
0.7035175329170748 0.4744818572170044 0.3142988501584518  
0.1953387376603237 0.3276832511410608 0.8129710778057415  
0.2086838432048353 0.8240464570736143 0.3942623384747778  
0.6948147511095094 0.9775623402388869 0.8851435389854981  
0.6943601941225562 0.3285861545617246 0.8869552019598916  
0.2063831981854573 0.4803774422271476 0.3977415565208831  
0.201133051524891 0.9708652333846652 0.8114419665979580  
0.7071756133230638 0.8213175148855419 0.3025356270378278  
0.5902812543127973 0.4655510397426665 0.4155219983831273  
0.3075057881125325 0.3429965943170437 0.9103111281262970  
0.0957170483909799 0.8310607133732085 0.2947653731804672  
0.8111794960981145 0.9735430529303074 0.7915379888796609  
0.8071999798626174 0.3336180795492936 0.7897334673752593  
0.0943883463650691 0.4694475652563727 0.2938791316949502  
0.3158912623262122 0.9833369648220655 0.9068846184237331  
0.5971934816398227 0.8388687098881760 0.4043647201599965  
0.5971249686688223 0.5416650925907501 0.2518237862777743  
0.3046483044476177 0.2723652509080414 0.7393058795586471  
0.1044633447166793 0.7567542132013428 0.4634192796729535  
0.7958920967682106 0.0427015312207065 0.9627355012957588  
0.8005391567012213 0.2616973150365792 0.9587296797943720  
0.0996468741003589 0.5422727837094312 0.4633798649541741  
0.2930456214380749 0.0543890928860461 0.7422221081461156  
0.5963173011190699 0.7590895135156713 0.2450305792214599  
0.6009626672269802 0.4064023888439054 0.2381620225967487  
0.2881031564700403 0.4072915055590862 0.7358581567943897  
0.1075525128904845 0.8919876274880038 0.4711715681652581  
0.7964054640846917 0.9073211592058313 0.9603533054124740  
0.7954121183107776 0.3965590172282338 0.9640656211597980  
0.1062276950780675 0.4071163814088650 0.4693345962387256  
0.3120819660623231 0.9225470576462833 0.7268998791166670  
0.6089270730616978 0.8927207638531618 0.2201772744986777  
0.5256558150158022 0.4482383053949116 0.5833930029536651  
0.3808868178086147 0.3557726355572049 0.0741899869601229  
0.0220149050192223 0.8563669973554472 0.1341634541123734  
0.8784745535445437 0.9393349390433862 0.6302999253534903  
0.8787865097771209 0.3609637478454887 0.6305251374660498  
0.0201109914298537 0.4451593788905045 0.1333572459979582  
0.3718576303500394 0.9431778624612922 0.0792383271926882  
0.5260831356790283 0.8594638918204016 0.5665618434823816  
0.5150165472965059 0.3545629851384856 0.4383337242166692  
0.3973759261113759 0.4427062658502098 0.9211396232745448  
0.0173797019306754 0.9404142573851075 0.2918224449280500  
0.8806873016694594 0.8579343456887969 0.7917156509156744  
0.8838687582065164 0.4440346525983623 0.7901969808406983  
0.0181262700855553 0.3592009589622439 0.2902984512405402  
0.3506174169583001 0.8568055772987697 0.9282816672985273  
0.5125781335559640 0.9429179667763459 0.4064589498731989  
0.4574963272589935 0.4725975753683824 0.4160186152895085  
0.4354345160470253 0.3160694214155145 0.9002983784117874  
0.9660772778784669 0.8181774921627183 0.3082843567647564  
0.9433377057470428 0.9746770881039147 0.7966906274911968

0.9380174953532271 0.3234621660577503 0.8014658452385666  
0.9641322613682710 0.4805850576592472 0.3077490245103752  
0.4447719022875890 0.9508727816467888 0.9165190359137074  
0.4678070684365270 0.8172194026632541 0.3981450064315571  
0.4900782625272323 0.5107993901165641 0.7479553619728329  
0.4274737144347883 0.2758816148438021 0.2175076780184287  
0.9793894461504248 0.7774047109399705 0.9883646840460301  
0.9191696348707080 0.0244504061731153 0.4899209678370510  
0.9150595033732078 0.2745337645485252 0.4898586833782185  
0.9745801690582099 0.5253155237842867 0.9886769563347887  
0.4138584802666675 0.0238468872299166 0.2210640034230108  
0.4833325669106240 0.7631824483706796 0.6892772371926924  
0.4003315585589938 0.4371069633409970 0.6420143457653357  
0.5096743983226425 0.3548822131286472 0.1157570847168889  
0.8960590696288270 0.8642641373768822 0.0764947282406525  
0.0042646923755682 0.9376200798600118 0.5737406818034606  
0.0040232389117499 0.3581759130933690 0.5711763975618681  
0.8931583363052629 0.4398512110736718 0.0816545579659389  
0.4997189327212916 0.9396816778571906 0.1326568552617875  
0.3993178423657927 0.8577642222553252 0.6172015491184313  
0.4953704883477587 0.3781615470152182 0.7450585461158742  
0.4266724079234481 0.4088367435019450 0.2459965479620019  
0.9919391165617275 0.9090458952425926 0.9563493507986902  
0.9086973500852975 0.8936655374477953 0.4498168868411357  
0.9088013043282605 0.4061132591977872 0.4506216921091020  
0.9866727509640408 0.3929197794750102 0.957389998158674  
0.4074970145590316 0.8912645242685528 0.2544984325869842  
0.4920631883452188 0.8875794128224033 0.7557482109222546  
0.3063525529330838 0.5325133478790290 0.6727586170456105  
0.6009640102606274 0.2751422758560029 0.1990227062243510  
0.8088299069942025 0.7766497619212429 0.0036780510045145  
0.0935874996613229 0.0239765357118367 0.5013858854861279  
0.0991066096073154 0.2752339866054038 0.5059516678974878  
0.8032425583371110 0.5261787195594287 0.0101649735768635  
0.5880669232181032 0.0250525416706645 0.2080855830996285  
0.3091134752990510 0.7880494706021315 0.7218409392614907  
0.2869940190131775 0.434356633284775 0.5412708208464689  
0.6347147798432670 0.3626276983995017 0.0569248952805522  
0.7705630447185681 0.8661933148832299 0.1412708913275387  
0.1266678760270146 0.9423849102331059 0.6512588112384687  
0.1245578351273047 0.3613378797482721 0.6528451613068774  
0.7675237759455953 0.4359849426020140 0.1477612456458799  
0.6176355145759255 0.9556756594441874 0.0449270620223920  
0.2728956688465803 0.8591815056522562 0.5613405839644119  
0.3312268479854377 0.4610025847088962 0.3558796350650499  
0.5655853462652988 0.3265593263316877 0.8959307588587111  
0.8369978603006609 0.8370014118021191 0.3050979495892817  
0.0727132426908348 0.9690670182839727 0.8280368589520333  
0.0669631127079439 0.3315598308382665 0.8269590203524841  
0.8340866498620801 0.4637240742415707 0.3105400161547843  
0.5680736245360082 0.9714329334518826 0.8597654625046001  
0.3373530139116835 0.8275283094559022 0.3932516419667798  
0.2538067360123815 0.3555099535284430 0.3895297849771541  
0.6272221984073635 0.4458256747793597 0.8990635339287941  
0.7577583338054235 0.9444977869562982 0.3046189503642462  
0.1396863810217698 0.8537515101648184 0.8025362720617155  
0.1341849845996094 0.4465243863433388 0.8086074450309315  
0.7584223765789573 0.3535585409975851 0.3084425304313990  
0.6354118343754330 0.8595359797243922 0.9069322282523119  
0.2703760066801615 0.9434570650614511 0.4044346718883817  
0.4126470721139706 0.5428009947352502 0.2630706497551787  
0.5046961580206695 0.2464984277826869 0.7680454379788771  
0.8883983378660280 0.7596902342219697 0.4422223230481254  
0.9978685775139589 0.0442767111019530 0.9430117233505887  
0.9962012537483895 0.2577445459980909 0.9484507143446662  
0.8884713798313135 0.5407470082489356 0.4435500506255118  
0.4694469401857393 0.0217085054948771 0.7533114314407378  
0.4032321049700783 0.7546642791703165 0.2595618572580783  
0.7061236185419314 0.2307422576097869 0.3040147403567618  
0.1891379305662877 0.5689970829552613 0.7791258734419934  
0.1979409792471630 0.0550731138947315 0.3836962539969722  
0.7005210319678110 0.7445466089525304 0.8949884501016699  
0.6964789628749117 0.5600791026459692 0.8981182917050944  
0.2089336678136515 0.2316884961165356 0.4089197486506962  
0.1950428040751388 0.7321878246028927 0.7786769838995826  
0.6996027066144088 0.0639813349552296 0.3037453432705755  
0.5924194521590559 0.2506662442192394 0.3973207429767769  
0.3072695274714489 0.5406650059841104 0.8958194068396456  
0.0797355307209952 0.0580531937892028 0.3065833244362424  
0.8180139560914997 0.7404756318939598 0.8097996041085689  
0.8122789220137346 0.5560372002236111 0.8128907648231576  
0.0957487379784131 0.2502067815424976 0.3088084778327304  
0.297125829553197 0.7377267216804040 0.9062968219807050  
0.5878196248520137 0.0535934236957228 0.4047412385410686  
0.6033598992518879 0.1505000016451706 0.2651348669735394  
0.3007483593626673 0.6541245156211892 0.7492822548930486  
0.1100211567525603 0.1495841523449981 0.4439715702850562  
0.7875232733050156 0.6508473978329133 0.9514039511309874  
0.5298341797202092 0.2534812038523632 0.5706280888588356  
0.3735281186679035 0.5283315756903604 0.0710924632200554  
0.0187690758317384 0.0258707350477158 0.1372123859331822  
0.8782074270442869 0.7722630344384560 0.6389430586584981

0.8729086100096795 0.5311097009526735 0.6401724468357348  
0.0245442955616450 0.2701836621867163 0.1419761955447908  
0.3693881483839057 0.7651290166846618 0.0692576339394004  
0.5143205235799183 0.0222474259670268 0.5664105691305223  
0.4598395663053600 0.2356903431967700 0.4030343085329074  
0.4364362030049291 0.5699035490036033 0.9088221817132299  
0.9480195771696911 0.0548886273016631 0.2991014693351773  
0.9505108959912528 0.7435397581161303 0.7988540686202390  
0.9438219458967698 0.5634191362277984 0.8009773194454325  
0.9641822458509574 0.2377074555404630 0.3116906046757970  
0.4295868071152747 0.7512059816650397 0.8919524055797143  
0.4563903900320976 0.0643992374158629 0.3998976735759813  
0.4984690526812300 0.1377405416472452 0.6612669841808140  
0.4086127684089020 0.6475564158284308 0.1445285905407364  
0.0029440640294611 0.1498563534816918 0.0643409669399082  
0.8838523732921110 0.6511568543030135 0.5555806742045286  
0.4073030798577859 0.2344031121302854 0.6307475321553480  
0.5000450277532864 0.5516930446635732 0.1150768356521367  
0.9007931935588358 0.0657636837345806 0.0757049142948047  
0.9916117861514464 0.7299325999898425 0.5573686079270014  
0.9887907579005898 0.5705113194400321 0.5627774394576247  
0.9020080666561052 0.2368741982000606 0.0845620644276614  
0.4967449538165639 0.7454152607771686 0.1161673668562647  
0.3922201390608769 0.0670615823592920 0.6079685531047547  
0.2971455743415687 0.1607503806931143 0.6252005312937938  
0.5902016903069537 0.6492533960417040 0.1337909306115802  
0.7992900168556238 0.1524766904771633 0.0748028408132635  
0.0957859404362506 0.6486794915978742 0.5819168200008583  
0.2988352931015016 0.2806861261192179 0.539984347776057  
0.6227549842459733 0.5289671234326034 0.0571002429592267  
0.7885273072721086 0.0326210691814279 0.1629984323615619  
0.0951369424781235 0.7716014946823373 0.6623365080964342  
0.0916912078934159 0.5247661698828303 0.6623230574305795  
0.785556084014086 0.2737852323209057 0.1557963232292620  
0.6188705484376674 0.7675145262833698 0.0488060373045247  
0.2721909507317359 0.03944845454410120 0.5455206372557885  
0.3326521868680195 0.2505196464529214 0.3515820738724214  
0.5675984511473432 0.5670138797211461 0.8835835014547777  
0.8234025624651125 0.0553747001836752 0.3568757170340215  
0.0755007719660626 0.7425522935070095 0.8578285858976439  
0.0695155269942478 0.5576125875401144 0.8559545711473648  
0.8336819465108692 0.2438628974147589 0.3378662285360121  
0.5724050278178244 0.7457179230069966 0.8612624150453734  
0.3271831361884980 0.0610192572631574 0.3638650467541022  
0.4031390155010951 0.1514211658562851 0.2727613304157603  
0.4926271353904341 0.6455540751560971 0.7692859376236522  
0.9044396291541709 0.1488316595260570 0.4285323596836637  
0.9913546051428189 0.6516933814791405 0.9328635011454965  
0.4225350768425044 0.5871888093572842 0.6112755116214287  
0.3759172355613370 0.69999151639074953 0.5759209923495462  
0.4861647057356773 0.6775998645822237 0.4488410402686371  
0.2423387024425210 0.6516546506458485 0.5615472925398665  
0.5725579401265140 0.6547868033322147 0.5982385635549312  
0.3378487248015870 0.5901148761974839 0.4688425501240860  
0.6232125758863737 0.4718141156788541 0.3038761180900158  
0.2744999130509918 0.3376386530582665 0.7984306979676984  
0.1287242141813591 0.8257122857797922 0.4068967006089382  
0.7743079133919755 0.9753692698244809 0.9009945622158354  
0.7741258109983297 0.3294821325139282 0.9015604068533419  
0.1264276849448951 0.4743769957927257 0.4067189223577812  
0.2800254908799450 0.9818831776324408 0.7966489500508735  
0.6274008585589641 0.8284315943689748 0.2908369445184356  
0.5221452933331794 0.4346695873035589 0.4631490530707495  
0.3802693376398119 0.3649318433510165 0.9520803291136947  
0.0251992833562686 0.8618441566695432 0.2560275432282164  
0.8784372120727428 0.9361422919678787 0.7524856730171521  
0.8772126076398411 0.3658615110076168 0.7523232256486393  
0.0240278923505723 0.4381050718641926 0.2551443356658250  
0.3707685139789205 0.9332961934633466 0.9576097859572161  
0.5260736335038086 0.8661444200769919 0.4447926467828400  
0.4764663325134655 0.4446246337268775 0.6804500842207716  
0.4354116969346942 0.3490371658932574 0.1638445221490417  
0.9720983979887128 0.8518659250922592 0.0381574857653189  
0.9282217514013922 0.9487735663994874 0.5351578780287560  
0.9273946871665230 0.3498374459791703 0.5346001338780634  
0.9685810675435409 0.4508250056216442 0.0392781555362469  
0.4238580338992562 0.9496932650775104 0.1719752200491736  
0.4741245971981348 0.8425656877022604 0.6573877439088979  
0.3214734889558214 0.4531564139097595 0.6475087706953148  
0.5864815654181889 0.3496971749486528 0.1528264437242076  
0.8185711041956648 0.8532600644282309 0.0451247637950180  
0.0826665873853264 0.9492861235679640 0.5496167954222987  
0.0831229138448281 0.3502834233692179 0.5498656337422629  
0.8153123987457173 0.4497667018590987 0.0514998247758856  
0.5783434610552755 0.9530703478393283 0.1512579408954772  
0.3226558777129054 0.8558245469712865 0.6577482277571085  
0.2703115400324968 0.4331327820069581 0.4221953498232131  
0.6302107774792051 0.3667930263708364 0.9343290057507785  
0.7685585201086073 0.8679037009545804 0.2635784077709386  
0.1346121441658011 0.9333332699467600 0.7725447151829938  
0.1297839704069745 0.3679038230189944 0.7749470473494535  
0.7658959900123088 0.4314615322879226 0.2702267196635345

0.6284467527546777 0.9399044896625135 0.9254710785203838  
0.2723242591668801 0.8645172591238417 0.4387481327763940  
0.4069358318686145 0.4705624988446422 0.3206879373630641  
0.5000217178600311 0.3181104093108608 0.8273631358112498  
0.9003707980979581 0.8281184281973069 0.3775721841722103  
0.0012528502515170 0.9733282737136773 0.8817880469427066  
0.9969618643229304 0.3276801259348669 0.8847196426541194  
0.8992931782825961 0.4718800870990484 0.3792713935911756  
0.4935091004138997 0.9578103708443679 0.8202777911296715  
0.4025927452799146 0.8244690667821697 0.3237351968903275  
0.6259388678688432 0.2274273946795319 0.2913049757611588  
0.1209216419176612 0.0714678928711174 0.4100461439090903  
0.7780102340375310 0.7287435989637165 0.9154211075602616  
0.7748256649411144 0.5728383568606285 0.9187696170587976  
0.1285769363405560 0.2274144512757708 0.416553815252335  
0.2756591769253829 0.7277777909945709 0.7881527914647031  
0.6201462960910422 0.0728037400757288 0.2950125513000506  
0.5240115876366678 0.2736627357108825 0.4520462888682197  
0.3760019335593924 0.5207887524426091 0.9476379403104703  
0.0160936525094668 0.0196751188414414 0.2593976204447973  
0.8817341186938332 0.7784370230948703 0.7610016365274395  
0.8781012594103145 0.5236579153035668 0.7619835182304299  
0.0261644974757482 0.2793099900583253 0.2638346157486538  
0.3636220917489195 0.7765319663614649 0.9472952858027383  
0.5182523355442885 0.0215078211001974 0.4439477287905284  
0.4843208614459876 0.2182921668452208 0.6575319654339862  
0.4235059389475436 0.5675409710504259 0.1473249200268312  
0.9796224177951892 0.0719245662854334 0.0545560960362164  
0.9114396989026440 0.7278913966827885 0.5490744756655109  
0.9090512712033051 0.5734831515606676 0.5508051374441616  
0.9806825856341814 0.2284260902872312 0.0598114775243557  
0.4200432435471347 0.7279457640318793 0.1457041684211829  
0.4682850029293118 0.0627045361110785 0.6477846498477944  
0.3270432971667483 0.2368606116949220 0.6344928256111431  
0.5772185738751747 0.5685281915238997 0.1396081103061032  
0.8211919102559979 0.0736344589511648 0.0691461792144034  
0.0713980385579051 0.7270016091614729 0.5662405555723927  
0.0685371442247606 0.5710250272419580 0.5682131534584426  
0.8224355881179314 0.2309415784192753 0.0675162611631085  
0.5751726777000129 0.7296848802505138 0.1343991792534559  
0.3140296495236948 0.0806107751659856 0.6306429199987784  
0.2739154156249828 0.2791501789382660 0.4229390864972279  
0.6279600398501616 0.5247459869182851 0.9341055825212622  
0.7681302012676079 0.0244515695625459 0.2812271699491122  
0.1265344870092055 0.7747430801360190 0.7758688371281360  
0.1228153511599870 0.5253469547731392 0.7772062107818390  
0.7713876036431101 0.2752260606013538 0.2768952524607298  
0.6300808478118526 0.7786648866485854 0.9271956651532508  
0.2674574470740121 0.0245074520374074 0.4247050384475986  
0.4057328054987085 0.2291175915007729 0.3120769980146081  
0.4960864688517507 0.5722753429553646 0.8268300928206762  
0.8986697068644238 0.0705613239112825 0.3935418366810992  
0.9996559802625934 0.7290882389504661 0.8944411480660928  
0.9953962884622408 0.5736896623971313 0.8947649857983996  
0.9039806197987148 0.2269715426531720 0.3916437404777899  
0.3994656880571716 0.0745309545728848 0.31430868217234464

Structure 27 S=8/2

1.0000000000000000  
20.1473052208877697 0.0000000000000000 0.0000000000000000  
0.0000000000000000 19.7681594983396742 0.0000000000000000  
0.0000000000000000 0.0000000000000000 13.2309279702280254  
Al C Fe H O Si  
2 1 2 10 198 94  
Direct  
0.2732957438561373 0.5716731569596083 0.7829355602058535  
0.4952478672898482 0.7313610651118332 0.8156741055349304  
0.2522165507855316 0.6395411676777568 0.2959728556526490  
0.3402393733057060 0.6253345164626953 0.5864681825694529  
0.4671780550189757 0.6692659027878387 0.6158111927102911  
0.2095745032294629 0.6466302418125878 0.6118800047217610  
0.2194729666184909 0.6177452559042576 0.5028470228451596  
0.6037546107659952 0.6670813778337452 0.6452575522082307  
0.5899284617423266 0.6593985013714276 0.5275174325301879  
0.4386455139078561 0.6407795445206474 0.4320721966602406  
0.4706239778272996 0.7135750822089488 0.4202589654326608  
0.2641424420038382 0.5898417215379828 0.2655547092078224  
0.3183599352425256 0.6194030857310533 0.4127676795695683  
0.2024007591197909 0.6493381087185216 0.3245089127405919  
0.2851886142298194 0.6821710493311284 0.2819748566391879  
0.7028778889697186 0.4734986404722662 0.3141796095694382  
0.1953999056702012 0.3267796762064336 0.8130720485942974  
0.2091640080895477 0.8240562392361493 0.3950382726888564  
0.6957970407431162 0.9795487072050003 0.8902452043072508  
0.6944103231164520 0.3286476055781179 0.8855928072321133  
0.2076950409361120 0.4798543392544073 0.3954695993945803  
0.2003467594649172 0.9715049504311775 0.8130330820461742  
0.7082454372456438 0.8222128655406724 0.3051923766067794  
0.5895939800643836 0.4638298055376137 0.4147298357204582  
0.3076676573058738 0.3442210999881131 0.9091303896989676  
0.0967644493936122 0.8316788257067823 0.2948460968733211  
0.8102037411462309 0.9720739636851918 0.7906560354728278

0.8073291306213523 0.3345933560964773 0.7893998186397601  
0.0936636544803576 0.4719845788035980 0.2958440774932264  
0.3152404101531618 0.9819649656636099 0.9092877159776762  
0.5975857339782864 0.8386492329237079 0.4058491071979721  
0.5961088864915582 0.5399447944807302 0.2517512264599074  
0.3054518044838942 0.2714317068856399 0.7403967037927043  
0.1045141835645741 0.7567423446174871 0.4629103553740428  
0.8004612411974901 0.0429320936227092 0.9607061131956529  
0.8004553106323430 0.2621049513129909 0.9582232590641482  
0.1047780602778782 0.5431721282854569 0.4674475204232811  
0.2932077160595714 0.0548876582927399 0.7461435983426516  
0.5985996880392853 0.7581283878798242 0.2471851978041382  
0.6010425744405828 0.4044279177297298 0.2375819433198319  
0.2867621336871584 0.4059038282065582 0.7322520113483286  
0.1080432888953204 0.8920013429886302 0.4723268646137541  
0.7978944551044855 0.9077406259410550 0.9614356359114573  
0.7950328611588992 0.3968244848085877 0.9640489904764236  
0.1070752292164687 0.4074667137188157 0.4688289459654540  
0.3110734087779681 0.9231774454995292 0.7281349485509014  
0.6094284855385751 0.8919084301234624 0.2215335990141747  
0.5242930883889009 0.4481633098876244 0.5817153548543593  
0.3817010514088724 0.3558131149908363 0.0724559055449297  
0.0224546460756171 0.8558294697851737 0.1343696394630203  
0.8784628540863750 0.9390919137143627 0.6299225492011176  
0.8807950626581711 0.3604686035724950 0.6320333169166600  
0.0203072834542019 0.4462159575878475 0.1344683711974096  
0.3722181348224699 0.9420671467314417 0.0801393994237976  
0.5254686550045147 0.8591702960064423 0.5667437334123735  
0.5127107179658175 0.3541430871929735 0.4371681771399165  
0.3982980344585537 0.4429645191829699 0.9194640090885635  
0.0174753580153071 0.9402352091613629 0.2915954606128905  
0.8813020440975423 0.8575003395097577 0.7913830548471336  
0.8861672257594027 0.4437611806822713 0.7911231631275107  
0.0194802304557335 0.3600489069247539 0.2909410706755946  
0.3516788142249789 0.8557477001302216 0.9284750981416291  
0.5120649726921876 0.9421322994242376 0.4069010892301180  
0.4566064818966440 0.4725859112512090 0.4138960745219867  
0.4353918988251144 0.3160627424914436 0.8981811155943648  
0.9674550854797187 0.8175656656245152 0.3094442175187579  
0.9425447227959243 0.9747303376011659 0.7970626151806425  
0.9374987761021865 0.3222013905103656 0.8051562380037675  
0.9633913007746526 0.4807881976223722 0.3082355081916625  
0.4448301491915574 0.9511169295490952 0.9172049467968231  
0.4683015261415258 0.8160179516191444 0.3971694110599167  
0.4928735287156570 0.5122131180253215 0.7461853486808814  
0.4260200963222085 0.2754424314297990 0.2167001983470716  
0.9800778708819344 0.7776615191142389 0.9876436074169707  
0.9182018840003093 0.0240044243256504 0.4886896875913198  
0.9165697546597642 0.2746138553108491 0.4906624357202482  
0.9723807978691679 0.5252961046228301 0.9901611294653083  
0.4125641980723951 0.0221189258913806 0.2239142490192180  
0.4821482850131901 0.7640596577560941 0.6903969357400525  
0.3999646780312442 0.4392260013584190 0.6457326225727597  
0.5104575177129745 0.3517302253828435 0.1144957767665096  
0.8962408367244473 0.8629335939780800 0.0781169635926416  
0.0040566416691510 0.9379156605376134 0.5730137564601606  
0.0057067303668676 0.3580308175122915 0.5716209527150630  
0.8932328782584791 0.4379185978734478 0.0828134063207120  
0.4996397114585567 0.9390261965035688 0.1358018481344268  
0.3987820199258152 0.8593297930416728 0.6179488987858167  
0.4961857318127864 0.3792171412712139 0.7448028999256282  
0.4290104200829697 0.4090141313022775 0.2430334420012010  
0.9909586387061339 0.9096652202117771 0.9576735143576649  
0.9086647719080780 0.8929991762973234 0.4496499480534363  
0.9099878839739831 0.4063555655919664 0.4523090451725397  
0.9879280756471752 0.3929674380639808 0.9587827586861973  
0.4063058789895317 0.8893054026877900 0.2547861690337299  
0.4917412228527189 0.8886329644729731 0.7555321617697834  
0.3020784444663768 0.5319391856012571 0.6701103920778981  
0.6022809793372165 0.2729245665308478 0.1979079210042593  
0.8089045875237323 0.7764432283776828 0.0030252573818670  
0.0938903864269230 0.0240565412729250 0.5018436741598175  
0.1009502041725354 0.2753445218182575 0.5059333134308678  
0.8047370118505000 0.5259197641396840 0.0110459861623001  
0.5875871295756162 0.0243930928838989 0.2121579850589266  
0.3096839495325913 0.7889766236158193 0.7242664625440982  
0.2900143174457440 0.4338734020941241 0.5376540459264989  
0.6354131969304884 0.3610891962362593 0.0565150361412285  
0.7703555395909817 0.8651698238687456 0.1414325584180795  
0.1258730706086851 0.9427830907965322 0.6526580471832654  
0.1267331702814352 0.3623048619131005 0.6517957024328083  
0.7675050635836619 0.4357244548937805 0.1481147665380733  
0.6173903037807004 0.9566109106602252 0.0480247947011670  
0.2719606359792976 0.8587523088015819 0.5634202254567877  
0.3308745877160759 0.4583754411265808 0.3499066503396294  
0.5656649942311971 0.3263735943807599 0.8953489373533592  
0.8382973609902697 0.8358191077702630 0.3035931420843534  
0.0718665666933756 0.9695650305039020 0.8294460366288153  
0.0665538277574814 0.3340286889953300 0.8237874302697489  
0.8335970612093754 0.4618018193297782 0.3119746475758488  
0.5692487713200631 0.9690330893388103 0.8621867817900810  
0.3376949027092986 0.8267897889557467 0.3966103536802362



0.2533086942496523 0.3538883586477791 0.3892825167700817  
0.6273007968531196 0.4456694480166700 0.900458100917231  
0.7609846386162396 0.9446023365515396 0.3041913448162439  
0.1388893347289530 0.8542880046905287 0.8040788663433766  
0.1371207243066619 0.4470573302501810 0.8079056474599575  
0.7572553915747511 0.3524448226990635 0.3078796784741780  
0.6406558806554877 0.8598878490019862 0.9129213697756315  
0.2712347153138607 0.9432417151980383 0.4065629565763787  
0.4106355387647360 0.5423201501001581 0.2600604968711860  
0.5050745372334325 0.2470722069174890 0.7661226234926973  
0.8887506781403443 0.7589654924782799 0.4420704872947389  
0.9962675989375780 0.0447382916227404 0.9436552495052820  
0.0005258193407382 0.2579256936126130 0.9486452535326096  
0.8868931835471412 0.5405014253293708 0.4436477861853945  
0.4725467046888441 0.0233999675988471 0.7566276431079169  
0.4002936402387989 0.7529572644715232 0.2614890109449431  
0.7075367605016460 0.2287568307803122 0.3026885604384310  
0.1878594378287891 0.5715176846564344 0.7818761391859832  
0.1997298501718700 0.0557791169408779 0.3875082750995066  
0.6999273281798218 0.7420556351292329 0.8972687215952154  
0.6978269578886274 0.5590609141029801 0.8987578221699735  
0.2096982080594601 0.2299053748864942 0.4080426873351233  
0.1953433620614622 0.7332816991182577 0.7789626085506417  
0.7003620373633892 0.0628139803188549 0.30510672312512087  
0.5945053887567961 0.2531910515490348 0.3970526696597503  
0.3080238923294082 0.5406735716141258 0.8923114478211016  
0.0832767701688456 0.0560959796821998 0.3058452086698800  
0.8167193175863435 0.7408954576496921 0.8091150270430358  
0.8134635362631158 0.5549211248211227 0.8131379597039661  
0.0963721940688689 0.2505989921726545 0.3089923148141241  
0.2981250940421230 0.7360616303174498 0.9064993037425059  
0.5896187204683826 0.0514981524299411 0.4087689416200541  
0.6034422898153439 0.1495221889594656 0.2702841828706632  
0.2993864307131940 0.6544507626247416 0.7459581851259978  
0.1095702705619580 0.1493855530992809 0.4431741686011100  
0.7891930738790226 0.6502143165665732 0.9508504936496237  
0.5303927853213259 0.2534822523441010 0.5690728497483103  
0.3730681210533104 0.5292608164078195 0.0680851517579940  
0.0207982146232663 0.0260401869532570 0.1371705921401021  
0.8777029912534003 0.7718395770677398 0.6388843574563404  
0.8750809077808923 0.5304720446257140 0.6405707574364375  
0.0253123538493475 0.2709050953048456 0.1424302871275752  
0.3692790736929872 0.7647562917493117 0.0705065206444425  
0.5140338247452478 0.0207898310319937 0.5679849548984294  
0.4624124499991520 0.2337380473441718 0.3999586324430170  
0.4372299775892927 0.5701127621420073 0.9067593036900073  
0.9515726540867573 0.0564570450818862 0.3004239228510565  
0.9494018996314200 0.7421890514882064 0.7994610340166697  
0.9450189767360521 0.5638022853075575 0.8013362718246810  
0.9646775361918727 0.2386858352102955 0.3116773989044367  
0.4304995193135977 0.7494906329846742 0.8944232429576457  
0.4586612318717072 0.0648778288418312 0.3999135762541914  
0.4990985130009689 0.1379492167395155 0.6594127018961676  
0.4099117316753979 0.6473566687851013 0.1432589193289918  
0.0040158390736465 0.1500809741115442 0.0651706427582851  
0.8852680415043320 0.6507174487592311 0.5564657931414100  
0.4076063973876861 0.2344847050207447 0.6290474371172773  
0.4999479269098527 0.5496929197306143 0.1136415728183804  
0.9019119004890681 0.0660000168281589 0.0813358633677707  
0.9917783913024362 0.7313056701416878 0.5583226127044965  
0.9898872631612560 0.5692786586507389 0.5570055212732128  
0.9035034571707918 0.2378998102849126 0.0808594587365748  
0.4966703669395483 0.7474458196462175 0.1219171110019347  
0.3927098856471434 0.0658045385024977 0.6119863042985237  
0.2979310327946146 0.1599600560451530 0.6263597389707396  
0.5878343606848246 0.6487472795656515 0.1360840237485272  
0.8009583115947434 0.1527763053590722 0.0733480138754457  
0.0951703753763316 0.6495153901472258 0.5836319298293099  
0.2975980233987496 0.2799327643367982 0.5414237514504204  
0.6238845626792545 0.5296442965448600 0.0580125849149697  
0.7867788332763040 0.0328450082046738 0.1601578142607115  
0.0962322614649144 0.7729767849389941 0.6614744487340971  
0.0898520513865311 0.5261715008081840 0.6659486951599600  
0.7877408182294204 0.2735171105492574 0.1560560091723865  
0.6182625884778647 0.7664168107045258 0.0503986312970720  
0.2728012445422069 0.0377687004724372 0.5498420279482981  
0.3342221861044229 0.2496816123454500 0.3546235466447116  
0.5687181579628782 0.5671849465452524 0.8850360027556411  
0.8256028796572109 0.0570801771387553 0.3515449786190683  
0.0750533797543697 0.7419741668358401 0.855881970603910  
0.0696236657671199 0.5551272731797940 0.8612641794075014  
0.8344371121655181 0.2444362467979391 0.3393321534172751  
0.5723525989876262 0.7502992824352831 0.8613366355348085  
0.3290031040062797 0.0610138691142925 0.3696764507747190  
0.4028541736892379 0.1503410752161172 0.2724690501884074  
0.4955771377121023 0.6466042765759306 0.7704672700042204  
0.9056420799014083 0.1491740842926580 0.4289561873709347  
0.9920374616652067 0.6515086470032381 0.9340914634179540  
0.4184127565858519 0.5900942127971083 0.6143728514900101  
0.3723943867385763 0.7043383036957356 0.5776434473098152  
0.4780084645989728 0.6686318749073972 0.4499285906468385  
0.2399923677196999 0.6466178286678241 0.5540598313799004

0.5713699406938610 0.6529688144051984 0.5947962817098238  
0.3507563836304436 0.5960799768159050 0.4576004513105547  
0.6225909259603605 0.4701328050280417 0.3032798249622609  
0.2745585654976154 0.3372181209219475 0.7975059417516857  
0.1291747279419415 0.8260570656686063 0.4073744357988731  
0.7755600131812100 0.9756004692730305 0.9017530137477360  
0.7740667163415810 0.3298560996052787 0.9010403367705564  
0.1277123966341505 0.4749213117187349 0.4074525419135439  
0.2793987038869236 0.9820177479664249 0.7991217323592734  
0.6284017273263999 0.8280985186844071 0.2928701196533076  
0.5207647662616576 0.4342375555177119 0.4617591168021060  
0.3807626854948850 0.3652920677512550 0.9504189751871603  
0.0258566492124836 0.8616843184250180 0.2561721314095189  
0.8781235061747924 0.9356627078273402 0.7520837738024481  
0.8782211359746387 0.3655897215109797 0.7536824425544689  
0.0240342793708600 0.4391249475479634 0.2562777711184233  
0.3711320428019390 0.9323912043824368 0.9585312868145607  
0.5258130805592124 0.8651222716134014 0.4449996979347898  
0.4767314540647174 0.4457765243829627 0.6805725244177204  
0.4359847920349144 0.3481300014350280 0.1622883084606504  
0.9721768686727457 0.8516380237373303 0.0386952755326547  
0.9279297331151277 0.9485917132767804 0.5344573413735522  
0.9289586292673102 0.3497961847743070 0.5356487416600024  
0.9684457114819870 0.4505357826113698 0.0405262051384352  
0.4234351777088770 0.9484167720344340 0.1738561869321556  
0.4735671442268743 0.8430655647592566 0.6577852437454550  
0.3207875039103634 0.4535613827818554 0.6463925204397514  
0.5871632928292388 0.3475460567614391 0.1522194884077742  
0.8188047675895795 0.8527402273072024 0.0455723595269989  
0.0826219173296103 0.9494836898179647 0.5502632799522519  
0.0847193508138970 0.3503751034007175 0.5496698325684729  
0.8155913824775622 0.4492352443444965 0.0521582340468609  
0.5782091614585300 0.9527364722864502 0.1542919710705044  
0.3224381848978501 0.8565396213165312 0.6592156167599208  
0.2712582370116814 0.4315675274457361 0.4196255719998746  
0.6303391434526204 0.3663670582455727 0.9340686336188148  
0.7697359381497655 0.8676048214163171 0.2638094265831578  
0.1338748564786060 0.9339327109650279 0.7739943559774392  
0.1310500311506438 0.3686074988080812 0.7740486599380286  
0.7653009487688853 0.4304451136298872 0.2704930367474920  
0.6300441571112820 0.9400413191319560 0.9293412426591583  
0.2726405109937105 0.8642906984507968 0.4408528717867402  
0.4069122186554143 0.4700028279816836 0.3176812160569364  
0.5003480817821778 0.3184796527691400 0.8259991954043915  
0.9010824461307474 0.8273699068934660 0.3773643163602400  
0.0001880193727530 0.9737164313959232 0.8826323018811669  
0.9981735825461706 0.3280212868851080 0.8853040818340470  
0.8987971620321782 0.4714266613486149 0.3801476240972134  
0.4945024508748126 0.9578573893670130 0.8218891373810122  
0.4022281521688172 0.8231466529339486 0.3253933313489801  
0.6271562247091690 0.2266889727212354 0.2920184061746919  
0.1221876802538561 0.0712179599182502 0.4108087352910593  
0.7779212517939883 0.7280190589573998 0.9155384523671340  
0.7761365729401655 0.5720903989736440 0.9191170822044166  
0.1292893410765435 0.2269956201033664 0.4162262163683379  
0.2759108394316032 0.7280845635899970 0.7884709310171530  
0.6208051041094920 0.0716898907176722 0.2986602583717136  
0.5248200955892719 0.2736623023291477 0.4505426630996027  
0.3766095967052943 0.5211289392481225 0.9447490066346675  
0.0183581751842321 0.0195788917331685 0.2593963606300663  
0.8811505965168569 0.7779631393699333 0.7609915844631137  
0.8797009959551274 0.5232720625460690 0.7624699670979649  
0.0269151998809327 0.2800773514170477 0.2641754988416457  
0.3643444420831459 0.7754420838661930 0.9482177548510068  
0.5189783966540346 0.0203817011791578 0.4456144488559600  
0.4847288804435233 0.2184634544483240 0.6558471335571543  
0.4236057216087733 0.5670727556834335 0.1450000669697609  
0.9802970623186421 0.0722077492991900 0.0561296147976033  
0.9116810042270445 0.7278311723996926 0.5493993889508385  
0.9098157849205639 0.5729361675009251 0.5500662381941974  
0.9825105476430810 0.2288299915386829 0.0593489104290895  
0.4199236241142269 0.7279186499172068 0.1475104750409984  
0.4692994994822040 0.0624824786669242 0.6495822759076290  
0.3273356143520593 0.2362839344387191 0.6350564439558205  
0.5767111002862519 0.5677198416528575 0.1399348723613123  
0.8225447626328700 0.0738399646645637 0.0688310134683871  
0.0715077721480262 0.7278783179605456 0.5664861598052967  
0.0692465960549720 0.5714864305769992 0.5696041516647269  
0.8237733092162384 0.2313278586050494 0.0662729890476802  
0.5750062508068748 0.7295536617882208 0.1372587606974151  
0.3146076512500566 0.0798987159138645 0.6340688330695543  
0.2742266887729192 0.2778610845384497 0.4237087632396120  
0.6289156819389927 0.5246333889153826 0.9350739721813627  
0.7691527914143598 0.0246090474978787 0.2795329926713118  
0.1265476428383058 0.7754191408179152 0.7758016183401415  
0.1228233983904924 0.5259214065125523 0.7797920244533160  
0.772221799901084 0.2744352100824035 0.2767254018469957  
0.6308466744733328 0.7790364528833909 0.9294912152332203  
0.2687231318704206 0.0241588895818716 0.4285934250964566  
0.4064152309989597 0.2280701666330688 0.3116675766080342  
0.4978810323914171 0.5730408581762566 0.8264201521556686  
0.9001022487339848 0.0711876699447213 0.3923856785397267

0.9995189809619212 0.7286791084237648 0.8941799175758564  
0.9953302625349988 0.5732715169390816 0.8969109158300188  
0.9049326943171624 0.2273662305672972 0.3922896417858903  
0.4002659677628436 0.0739164418624291 0.3163710157084491

Structure TS reaction CH4/26→27 S=8/2

1.0000000000000000  
20.1473052208878016 0.0000000000000000 0.0000000000000000  
0.0000000000000000 19.7681594983396991 0.0000000000000000  
0.0000000000000000 0.0000000000000000 13.2309279702280005

Al C Fe H O Si  
2 1 2 10 198 94  
Selective dynamics

Direct

0.2739583129500076 0.5720815410676181 0.7816076005092540 F F F  
0.4949843507323450 0.7310184069991408 0.8148081091050443 F F F  
0.2621363876658789 0.6334749725705893 0.3106452763887932 T T T  
0.3386651503063135 0.6250173741543343 0.5818337022811654 T T T  
0.4652370725760898 0.6687806364572577 0.6142884044611533 T T T  
0.2089712215522666 0.6450571604651104 0.6153626150695629 T T T  
0.2187583263662862 0.6241039723136880 0.5019722201390555 T T T  
0.6018604167608101 0.6673794587733228 0.6445264186914910 T T T  
0.5882178813365712 0.6600872607318385 0.5267740409148078 T T T  
0.4402262525559074 0.6435081802563926 0.4263931275443715 T T T  
0.4715232122475211 0.7165764330075344 0.4201310109257024 T T T  
0.2685297176558444 0.5852770801965815 0.2718080175056848 T T T  
0.3080723275728430 0.6184187899892464 0.4015071857085568 T T T  
0.2127912026311655 0.6434259230974034 0.3415842971137628 T T T  
0.2886599516359175 0.6772772352319910 0.2809511571793198 T T T  
0.7029773510845487 0.4736511316978635 0.3141095614991158 F F F  
0.1955587144548616 0.3271404365231945 0.8127434982179977 F F F  
0.2090813472528623 0.8239973385841353 0.3949723090944843 F F F  
0.6956368074101462 0.9792647975248201 0.8896222811256038 F F F  
0.6943663985091035 0.3287463018900780 0.8856756306423108 F F F  
0.2074544672836538 0.4798219340634873 0.3955360643691250 F F F  
0.2004415842088463 0.9714158664963506 0.8127975841744330 F F F  
0.7080810297127229 0.8220988909183049 0.3048370442339561 F F F  
0.5896454714366470 0.4641220890005116 0.4147094241685920 F F F  
0.3076857768657675 0.3443750651987969 0.9090161880995709 F F F  
0.0965805043469103 0.8315437722292955 0.2948973893915365 F F F  
0.8102773970527224 0.9722671839490218 0.7907283935838763 F F F  
0.8073111762001233 0.3344566984184993 0.7894500716785871 F F F  
0.0937393427656446 0.4716415436260846 0.2954914484462208 F F F  
0.3153161402915856 0.9821267578093327 0.9089328667607646 F F F  
0.5974840759068059 0.8386233602848208 0.4056440418998832 F F F  
0.5962160286476248 0.5401834781736170 0.2515717144559915 F F F  
0.3054640516727574 0.2721745102312028 0.7398477311213085 F F F  
0.1045813933436932 0.7566663667502951 0.4630274352942010 F F F  
0.7998605228449804 0.0429283680144437 0.9609379892129013 F F F  
0.8004047876566034 0.2620709920973070 0.9583049001224779 F F F  
0.1040347980407503 0.5430179375550281 0.4667648528391624 F F F  
0.2931617485410882 0.0548585018950050 0.7455833640529903 F F F  
0.5982995699975859 0.7582726995664615 0.2467438764776873 F F F  
0.6010286226465951 0.4047381821366685 0.2375321336999079 F F F  
0.2869535367129288 0.4069811700813304 0.7327728798205158 F F F  
0.1078962660095542 0.8919258550556748 0.4722301150977017 F F F  
0.7976866443296089 0.9076913313907156 0.9612788856055872 F F F  
0.795046143239063 0.3968051063726890 0.9640279141928190 F F F  
0.106882386966266 0.4073523734333477 0.4688339874985132 F F F  
0.3112457548820089 0.9231975183514862 0.7278121200947396 F F F  
0.6093672267435579 0.8920524575293101 0.2213840572523296 F F F  
0.5245702445550506 0.4480873662968108 0.5818397014966905 F F F  
0.3815833850141672 0.3558432150742163 0.0726289581433122 F F F  
0.0223854091190034 0.8558997274139131 0.1343440001701239 F F F  
0.8784445049303287 0.9391136535732798 0.6300115588653483 F F F  
0.8804538904327117 0.3605673778004501 0.6318360757373611 F F F  
0.0202769269428487 0.4460785338631013 0.1342956899028067 F F F  
0.3721757129351815 0.9421818926208516 0.0799879174322484 F F F  
0.5255462499880323 0.8593628540977889 0.5667613254152712 F F F  
0.5129862461848802 0.3542609237422525 0.4372243216102092 F F F  
0.3984281524655628 0.4429908618622349 0.9197855409972675 F F F  
0.0174346900830287 0.9402531305677897 0.2916081986326731 F F F  
0.8811993973733934 0.8575535019906866 0.7914671726791269 F F F  
0.8858479511282980 0.4438024489437566 0.7910493414750945 F F F  
0.0192575196559517 0.3599330971730978 0.2908611600809508 F F F  
0.3517628587720552 0.8558904216982199 0.9283744678603014 F F F  
0.5121368096418024 0.9422128475114846 0.4068272965158215 F F F  
0.4566853351826836 0.4727151507103500 0.4141428315588911 F F F  
0.4353947513501950 0.3160600188419167 0.8984196702769793 F F F  
0.9672225859368240 0.8176335947510793 0.3092761497729697 F F F  
0.9425817828497358 0.9747456329108672 0.7970863905972223 F F F  
0.9375959735748722 0.3223981763230483 0.8046071307425962 F F F  
0.9634806093926471 0.4807889679831376 0.3081960772093666 F F F  
0.4448466973565530 0.9512146444016309 0.9170961676615477 F F F  
0.4682309891518202 0.8161181942790208 0.3973980759186446 F F F  
0.4919487791424402 0.5122857873242879 0.7456793173381513 F F F  
0.4261744560213714 0.2753905130089862 0.2166214309599326 F F F  
0.9799211818837392 0.7775771997885741 0.9878252322774088 F F F  
0.918277825345596 0.0240810401907154 0.4889182122618649 F F F  
0.9162980886821970 0.2746213130935047 0.4905216523544382 F F F  
0.9728929725824713 0.5252804329611394 0.9898127030706618 F F F  
0.4127470606217614 0.0222996427468587 0.2235032532214305 F F F

0.4820723467417096 0.7637468590391236 0.6896796675136656 F F F  
0.3999694564562617 0.4388429310505799 0.6449043605425189 F F F  
0.5103428892202686 0.3521654824451304 0.1146498761870731 F F F  
0.8962040380887260 0.8631391684371721 0.0778587917394375 F F F  
0.0040638591340141 0.9379114271134057 0.5731259229297407 F F F  
0.0054438563179460 0.3579986789607332 0.5716124886295759 F F F  
0.8932673861898124 0.4382546674665022 0.0825344851379981 F F F  
0.4996541009206581 0.9390612263747613 0.1353046409326950 F F F  
0.3988117655138268 0.8591299163204624 0.6177612682459284 F F F  
0.4960721061108018 0.3791968199374338 0.7448959525441836 F F F  
0.4286796548775484 0.4087522200327669 0.2435952316659709 F F F  
0.9911422858841021 0.9095419282348658 0.9574156618754515 F F F  
0.9086591124889978 0.8931022224721161 0.4497034253485594 F F F  
0.9098441966575024 0.4063608185630443 0.4521329777254834 F F F  
0.9878191579511864 0.3929329356921301 0.9585548793889203 F F F  
0.4065149358580413 0.8895680142905675 0.2547793082401597 F F F  
0.4917258479051796 0.8884268513051481 0.7555486603071273 F F F  
0.3028523206504801 0.5328880519860562 0.6680587017831385 F F F  
0.6021576929193344 0.2732712198830782 0.1980407933613506 F F F  
0.8088703763036449 0.7764795907760771 0.0031202564397645 F F F  
0.0938543079749223 0.0239962597440950 0.5017181077884061 F F F  
0.1006861226875913 0.2753045591413326 0.5059707613038142 F F F  
0.8045170193393076 0.5259548040998823 0.0108894333281526 F F F  
0.5876312944646855 0.0244778552350411 0.2115584234388805 F F F  
0.3094587234201711 0.7890716505513069 0.7241922010008466 F F F  
0.2895925311013272 0.4337409459772914 0.53786696903506324 F F F  
0.6353013599969231 0.3613741918769335 0.0564674185744920 F F F  
0.7703952359193167 0.8653361699698721 0.1414133288318453 F F F  
0.1259660626429309 0.9427287122470105 0.6524590760914677 F F F  
0.1263892243990483 0.3622488638753651 0.6518735127205986 F F F  
0.7675583811953217 0.4357479658602728 0.1480480776873492 F F F  
0.6174052245625390 0.9564202894665286 0.0475404984026611 F F F  
0.2720908731151823 0.8588348022288699 0.5631173443864625 F F F  
0.3309239720921227 0.4588630840395851 0.3507172403857695 F F F  
0.566238862417027 0.3264696882012146 0.8953810310081707 F F F  
0.8380905987899112 0.8360092279005258 0.3038665259464324 F F F  
0.0719514115417113 0.9696180423874310 0.8291720582899202 F F F  
0.0666875179388882 0.3335888924580459 0.8241993166637016 F F F  
0.8336774796496442 0.4620415827007491 0.3117938607446291 F F F  
0.5690817374018025 0.9693587579869316 0.8617583390347718 F F F  
0.3376386051222724 0.8269602702973984 0.3960565903081559 F F F  
0.2533798564966006 0.3540615835661711 0.3889658012264974 F F F  
0.6271376337254821 0.4458101749198065 0.9000938033764356 F F F  
0.7604803634961286 0.9446135330937508 0.3042916051189906 F F F  
0.1388536783113068 0.8542881527435640 0.8039640941005786 F F F  
0.1366155543973875 0.4470178126172968 0.8080811230031273 F F F  
0.7573998499381034 0.3526100124008309 0.3079491598564417 F F F  
0.6397791326918068 0.8597224709267124 0.9118456405327535 F F F  
0.2709892590761527 0.9433011332478642 0.4062025523649666 F F F  
0.4109449433944619 0.5421843494413423 0.2600451337590144 F F F  
0.5050498233275462 0.2470522167459919 0.7663220522502101 F F F  
0.8887337404330182 0.7590714637222717 0.4421222554923787 F F F  
0.9964122070906001 0.0446816586075727 0.9435792186431868 F F F  
0.9999465500269409 0.2578941476559962 0.9485966002731345 F F F  
0.8871127958363729 0.5405358283794897 0.4436819683115232 F F F  
0.4721081364694371 0.0231865801942917 0.7561355435438628 F F F  
0.4007833452837488 0.7532580861805940 0.2610635232815497 F F F  
0.7073138014237230 0.2290195293790589 0.3029556284383972 F F F  
0.1884059964760283 0.5709608303629139 0.7803603065915254 F F F  
0.1994908036033749 0.0557624933151502 0.3869574509682039 F F F  
0.6999859602272380 0.7423298307956259 0.8968744722147690 F F F  
0.6976571167571137 0.5592395397775931 0.8985873885308990 F F F  
0.2095529007126800 0.2301136290433874 0.4080979000902332 F F F  
0.1952225994712862 0.7332197377787821 0.7791468496439151 F F F  
0.7002219886891581 0.0630179523906307 0.3049355043872097 F F F  
0.5942108643794484 0.2529078942234548 0.3970771053661366 F F F  
0.3082965635795105 0.5405350027368740 0.8911472374833025 F F F  
0.0827866970589639 0.0563259193390522 0.3058527085661922 F F F  
0.8168997326100751 0.7408170051827767 0.8092066164173275 F F F  
0.8133735776511486 0.5551048805037126 0.8131155891092234 F F F  
0.0962563055817682 0.2505675460787984 0.3089752592450878 F F F  
0.2979544764971394 0.7364467171050606 0.9066360313381878 F F F  
0.5893581998881743 0.0517887761812119 0.4082128030306436 F F F  
0.6033804309265136 0.1496664841187609 0.2695810381393429 F F F  
0.2996171441268345 0.6547439763258254 0.7461650615305118 F F F  
0.1095567404023257 0.1493998051250429 0.4432596974309391 F F F  
0.7890015353154141 0.6503029263127686 0.9509725920711176 F F F  
0.5302687489617242 0.2535308938630223 0.5692369376200901 F F F  
0.3728282599521009 0.5294499696677093 0.0680247634737370 F F F  
0.0204597756533289 0.0260143412966514 0.1371761646857053 F F F  
0.8778380630809224 0.7719269452427255 0.6389159928748498 F F F  
0.8748161116850355 0.5305487889047598 0.6405608358734867 F F F  
0.0251722167817690 0.2708423816949832 0.1423515970080160 F F F  
0.3693402392602820 0.7647576844412285 0.0702172021349199 F F F  
0.5141067216087478 0.0210460428331913 0.5677740671051907 F F F  
0.4620434263629747 0.2340244675338283 0.4002758836640936 F F F  
0.4373509054107316 0.5700797213170716 0.9071894484927654 F F F  
0.9510767742537354 0.0562323021196320 0.3002783978725532 F F F  
0.9495151136545203 0.7423229707798100 0.7994232540578992 F F F  
0.9450034855391962 0.5636863570830073 0.8012131887683793 F F F  
0.9645973090095126 0.2385534915448204 0.3116804214737812 F F F  
0.4304821941519350 0.7495880903485244 0.8939170902552149 F F F

0.4583334012555085 0.0647903563669416 0.3999121424503187 F F F  
0.4989954991906700 0.1379485777217724 0.65966677311294030 F F F  
0.4096850944235584 0.6474214751486826 0.1434859934157942 F F F  
0.0038158095942151 0.1500711391592731 0.0650899034946377 F F F  
0.8849862784359388 0.6507847836142915 0.5563838573778455 F F F  
0.4075678751435845 0.2344909079799251 0.6292485363692037 F F F  
0.499886009017889 0.5499507196542055 0.1135595975100401 F F F  
0.9017049915367465 0.0659993536268075 0.0806594701212617 F F F  
0.9917954622907388 0.7309360356067174 0.5581980631274348 F F F  
0.9897238613548112 0.5696122250022952 0.5578281317630953 F F F  
0.9032540471088026 0.2377791166096443 0.0813252765023691 F F F  
0.4967296830976480 0.7471809510283549 0.1208720752203263 F F F  
0.3926357426599694 0.0660246891692040 0.6113292068992564 F F F  
0.2978257408521756 0.1601696777850279 0.6264270150158779 F F F  
0.5880913211983412 0.6488026424203568 0.1356932229234928 F F F  
0.8006592594968112 0.1527421155491879 0.0735403960339909 F F F  
0.0954523937961085 0.6493584054801715 0.5832478465933164 F F F  
0.2977738162425254 0.2800271483963144 0.5409688961373860 F F F  
0.6235569210711276 0.5296095603520712 0.0575677265951740 F F F  
0.7869446447025155 0.0328145622042726 0.1605376879621687 F F F  
0.0960291532397264 0.7727614416641444 0.6616805401899128 F F F  
0.0900562500805790 0.5259212714200174 0.6653845738123110 F F F  
0.7873770625512009 0.2735254646738383 0.1560101626218824 F F F  
0.6183757776209617 0.7664993212967843 0.0499884915641360 F F F  
0.2727213422201586 0.0380718666036159 0.5492040687692068 F F F  
0.3339821854159268 0.2497407134437495 0.3540298097949162 F F F  
0.5685905073547133 0.5674264692992210 0.8840457313841981 F F F  
0.8252605624268625 0.0568824100425545 0.3522768506304104 F F F  
0.0750523044250002 0.7421253005361379 0.8562173377840736 F F F  
0.0699084530200835 0.5557235308496900 0.8603821190613345 F F F  
0.8343357577842241 0.2443556279702932 0.3390927702611748 F F F  
0.5722125998256686 0.7491646370433216 0.8611324030044969 F F F  
0.3287208962165948 0.0610183415988317 0.3688290548094599 F F F  
0.4029162501606294 0.1504287024047457 0.2724493942510264 F F F  
0.4939425678429217 0.6461388935839665 0.7688505912987509 F F F  
0.9054586945461196 0.1491411532065143 0.4288989156600493 F F F  
0.9919862118316871 0.6515126923169845 0.9339415267202824 F F F  
0.4177896921031530 0.5892753366932028 0.6069491033666802 T T T  
0.3722186630170937 0.7040010196989983 0.5768097562512685 T T T  
0.4786062015927485 0.6710096414218097 0.4480958115808890 T T T  
0.2393552123593082 0.6488207886778325 0.5577401517085276 T T T  
0.5699004736015015 0.6524956146614413 0.5939568266948120 T T T  
0.3440297493583147 0.5976083342454415 0.4550353877213575 T T T  
0.6226819135387132 0.4703954169458200 0.3032544073001731 F F F  
0.2746682260209781 0.3378781194313092 0.7972580124114117 F F F  
0.1290904612269870 0.8259683544106409 0.4073634054960564 F F F  
0.7753718580756939 0.9755736090429892 0.9016523007073403 F F F  
0.7740361569172052 0.3298197905183855 0.9010886855071973 F F F  
0.1274747899795869 0.4747602721456374 0.4073081795876305 F F F  
0.2795001606184471 0.9819941202553508 0.7987103918323726 F F F  
0.6282354691388150 0.8281440595501195 0.2925983663987992 F F F  
0.5209328152536088 0.4343478954463862 0.4618324021954763 F F F  
0.3807493529013328 0.3653277698549289 0.9505636405695981 F F F  
0.0257369844230979 0.8616915310977120 0.2561760088386862 F F F  
0.8781289953730891 0.9357221359044630 0.7521740032827822 F F F  
0.8780720499442793 0.3656475071749270 0.7535217826691181 F F F  
0.0239851279821721 0.4389870877451756 0.2560971580700198 F F F  
0.3711381153496234 0.9325405296046085 0.9583587470994459 F F F  
0.5258421136612981 0.8652615437180415 0.4450447188949127 F F F  
0.4766300362669540 0.4455539991211239 0.6802840222744777 F F F  
0.4359068482984370 0.3481440201903965 0.1624167539069248 F F F  
0.9721511697138325 0.8516699280126616 0.0386034683065475 F F F  
0.9279414183247354 0.9486184285232824 0.5345948087073182 F F F  
0.9286986440878593 0.3498021472512676 0.5355315433016870 F F F  
0.9685227850853337 0.4505802063188611 0.0402497815826308 F F F  
0.4235056581044390 0.9485366675594662 0.1735597563699116 F F F  
0.4735931919671827 0.8428668349570785 0.6576677544900136 F F F  
0.3209216052005175 0.4539988685973881 0.6459565929511228 F F F  
0.5870752235570080 0.3478500088076331 0.1522090915803673 F F F  
0.8187622195513669 0.8528243549679075 0.0454979958439523 F F F  
0.0826041892489258 0.9494326139779048 0.5501790865007976 F F F  
0.0844512766649501 0.3503284969554059 0.5496709111455829 F F F  
0.8155722541231185 0.4493184634029745 0.0520297283957518 F F F  
0.5782186855342673 0.9527664368181803 0.1538265896160169 F F F  
0.3224634405482973 0.8564689616755174 0.6590069698295977 F F F  
0.2710844826761871 0.4317088780275995 0.4197400210983488 F F F  
0.6302800016352421 0.3665408410717959 0.9339983874410720 F F F  
0.7695573403387428 0.8676731331530618 0.2637933489505073 F F F  
0.1339328113604452 0.9339002149084408 0.7737981419251270 F F F  
0.1308725884982849 0.3685688631412845 0.7741067511296720 F F F  
0.7654020843099474 0.4305787284070064 0.2704200723953321 F F F  
0.6297816822200417 0.9399499583141306 0.9287293198598761 F F F  
0.2725860722897622 0.8643535827468867 0.4405808044200583 F F F  
0.4069395520058379 0.4699940310253865 0.3179474068528165 F F F  
0.5002986303813515 0.3184762239647014 0.8261177818141903 F F F  
0.9009603635166386 0.8274834116562175 0.3774394491942274 F F F  
0.0003093278093118 0.9736784358774386 0.8825045276219186 F F F  
0.9980329586135923 0.3279657122467796 0.8851856303655481 F F F  
0.8988489422299040 0.4715125928044372 0.3800532015398801 F F F  
0.4943534144291064 0.9578351769363564 0.8215850497427013 F F F  
0.4022912681619388 0.8233063505477602 0.3251612860855815 F F F  
0.6269612066345829 0.2267892133304628 0.2919186712623159 F F F

0.1219999405393395 0.0712296515846873 0.4106351288547430 F F F  
0.7779211362906295 0.7281157492067578 0.9155223087973212 F F F  
0.7759828059449845 0.5722101641254227 0.9190388362506354 F F F  
0.1291564610471738 0.2270409912019673 0.4162702212679861 F F F  
0.2758526867882694 0.7280824100011500 0.7885100609102906 F F F  
0.6206709010356519 0.0718465752059032 0.2981386384506308 F F F  
0.5246815891519816 0.2737222596628683 0.4506866077915319 F F F  
0.3765578406874610 0.5211527765348194 0.9446688184736374 F F F  
0.0180089278958775 0.0195746985627281 0.2593749961911129 F F F  
0.8812259795465707 0.7780269761794898 0.7610162379490575 F F F  
0.8795448029556567 0.5233279436601848 0.7624273834427910 F F F  
0.0267797028334513 0.2799719545407058 0.2641267184764402 F F F  
0.3643813083902430 0.7755617754257855 0.9479216475246233 F F F  
0.5188702318206424 0.0205013572835782 0.4453854974364262 F F F  
0.4846626625280877 0.2184510682801530 0.6560584678397348 F F F  
0.4235118514193132 0.5671442682427497 0.1449585289578650 F F F  
0.9801444659566840 0.0721775098724393 0.0559334535682439 F F F  
0.9116582703705802 0.7278137734370631 0.5493735164772673 F F F  
0.9096780165563487 0.5730398204408615 0.5502129414261745 F F F  
0.9822185186782093 0.2288029026709353 0.0593915345975162 F F F  
0.4200263012198988 0.7279649019618759 0.1471596911110282 F F F  
0.4691429571893053 0.0625284350263726 0.6493182779974234 F F F  
0.3272980955565714 0.2364977910589587 0.6348748341068600 F F F  
0.5766937827652114 0.5678373185136607 0.1397319791990128 F F F  
0.8222925778867136 0.0738239404500973 0.0688908941821893 F F F  
0.0715371083530414 0.7277224683582233 0.5665059896117981 F F F  
0.0691445848156818 0.5714100042434964 0.5693781596068774 F F F  
0.8235350157214967 0.2312622492380427 0.0664279738813320 F F F  
0.5750644903658610 0.7295624955455438 0.1367180603791383 F F F  
0.3145203538214076 0.0800495364645002 0.6335903340784341 F F F  
0.2741539569139064 0.2779998012768701 0.4233851831760873 F F F  
0.6286907695006789 0.5248035384907723 0.9346282868430222 F F F  
0.7689592459107857 0.0246091411170681 0.2797665558933886 F F F  
0.1264994376851831 0.7753853715460650 0.7759041886255034 F F F  
0.1230083271213118 0.5258829095335500 0.7792108807499432 F F F  
0.7720691432924056 0.2745354525131418 0.2767676970715414 F F F  
0.6305904579859956 0.7788092323066351 0.9288901147830586 F F F  
0.2685299702651918 0.0242314383755584 0.4280449373472877 F F F  
0.4063022105697414 0.2281523462574953 0.3115968302009904 F F F  
0.4974879172562368 0.5729301386843275 0.8260660102685122 F F F  
0.8988757341650219 0.0711086794779732 0.3925561709829424 F F F  
0.9995031181390814 0.7287272320875147 0.8942583668395585 F F F  
0.9955434433818198 0.5733416865710197 0.8964942698078815 F F F  
0.9047889188302634 0.2273122021068232 0.3921817003946018 F F F  
0.4001322699857326 0.0739478007740360 0.3160704258984168 F F F

Structure CH4/4 S=10/2

1.0000000000000000  
20.1473052208877697 0.0000000000000000 0.0000000000000000  
0.0000000000000000 19.7681594983396742 0.0000000000000000  
0.0000000000000000 0.0000000000000000 13.2309279702280254  
Al C Fe H O Si  
2 1 2 12 199 94  
Direct  
0.2695626564208944 0.5715060112659596 0.7808029509203802  
0.4993069490135638 0.7294055202414440 0.8156889149923051  
0.4724323298031431 0.6494958728906760 0.3529774065746338  
0.3281806038591157 0.6297765017844367 0.5939462567786642  
0.4982956442862927 0.6645457897074342 0.6173770564101438  
0.4781178234049360 0.5681162841539235 0.5120270381387944  
0.5161570305720934 0.7427923003830699 0.4562678843215048  
0.5633655591980737 0.6813112600324174 0.4580503926802491  
0.1945257310009138 0.6552428943698726 0.5644945761487745  
0.2400126552408277 0.6488205555211813 0.4657762601494949  
0.6136832361836795 0.6888763425093266 0.7381174773229595  
0.6266088978009365 0.7121296035631802 0.6270770910218558  
0.2875750764449598 0.5633117496157565 0.3530713194482986  
0.5035637622504462 0.6052713461113113 0.3676965939503386  
0.5019990334181859 0.6897008800365441 0.3184963412916827  
0.4486961523563766 0.6671608831036131 0.4224481307356516  
0.4317258843810226 0.6355529149599166 0.3039900332932362  
0.7010332738044540 0.4787584135727467 0.3081060193855832  
0.1919911844668131 0.3337795197625243 0.8119340907676763  
0.2077816662753621 0.8205116151831395 0.4004238366999819  
0.6954861032237214 0.9682209886724190 0.8821979194342862  
0.6923535141713069 0.3223072132555294 0.8874597627219618  
0.2037027015014522 0.4801607349233357 0.3893730785049708  
0.2013890200133778 0.9633668546706314 0.8097473517179500  
0.7062766524971110 0.8191037861365427 0.3003584174085527  
0.5900536030491661 0.4633050993832399 0.4134083836690075  
0.3051798072439206 0.3414892389853966 0.9063493071322646  
0.0967274096992773 0.8343952775716523 0.2965181245185564  
0.8130017995264841 0.9753723782010462 0.7935403451160472  
0.8050758949081498 0.3329370725636378 0.7876938871265103  
0.0910419854991157 0.4664150387133629 0.2912337944515938  
0.3147201689969361 0.9823111904811468 0.9061912274076673  
0.5971105689560428 0.8478108031343616 0.3997879783073447  
0.5888046888085183 0.5376100197495859 0.2478912299191530  
0.2971295427439628 0.2762787758325381 0.7313893144762988  
0.0978969866670828 0.7573218230890181 0.4613519064445606  
0.7901055622206103 0.0433753218623053 0.9623066139541409  
0.8018544677841902 0.2624378125994605 0.9581859010080946

0.0966117978902259 0.5399198047702565 0.4597685360853062  
0.2880517723554142 0.0528526318597579 0.7406121727919011  
0.5927631673786460 0.7600708086758529 0.2486925560834796  
0.6031180995786226 0.4032251726124053 0.2370263867716564  
0.2874796009811177 0.4122038870955333 0.7369429885524562  
0.1087184538864712 0.8915513260523616 0.4766782269928710  
0.8006122732811528 0.9086006622507949 0.9641696647399017  
0.7900395115645171 0.3973023573499970 0.9599240650723735  
0.1082666363317438 0.4052811530146854 0.4684955074824389  
0.3160495739718217 0.9223913952610479 0.7274256896620771  
0.6126354642259147 0.8916319111057616 0.2113150732151637  
0.5222524266631411 0.4367281977440741 0.5783495693487626  
0.3776498404742424 0.3580143884179376 0.0713299699811185  
0.0274796018277967 0.8612715911463351 0.1321362338774293  
0.8758388651146857 0.9382089430334151 0.6279546047963920  
0.8751968693878832 0.3638799150158908 0.6276068847807468  
0.0160464915275726 0.4426673503064499 0.1319917858101504  
0.3720569343271442 0.9414475949992104 0.0768780681637160  
0.5254253586942008 0.8644291025648276 0.5629135611533420  
0.5137719082959534 0.3532568922338078 0.4203883097797757  
0.3936962456534875 0.4410826174708833 0.9129284523776899  
0.0186253911849812 0.9434712779912173 0.2926306656373672  
0.8781053790222354 0.8588239415877381 0.7918566129084794  
0.8787225829387902 0.4453737949472703 0.7893503602717815  
0.0121364759892561 0.3585201407261508 0.2908414252430364  
0.3552054445363190 0.8566953198219660 0.9218591268253250  
0.5080624017884552 0.9467275693658531 0.4023456997243104  
0.4577053181378306 0.4725636511752734 0.4096255778443010  
0.4336142089651247 0.3137341217784654 0.9021270824000986  
0.9661274297620847 0.8222121519811252 0.3012924759076188  
0.9461010638406127 0.9722684002297997 0.7889659669197393  
0.9364773525723999 0.3260486276678790 0.7955695836337840  
0.9616492370775941 0.4815228235329028 0.3068122532142963  
0.4450346818321707 0.9559741938993692 0.9152593724833884  
0.4688045019022824 0.8191625096093230 0.3939315372345778  
0.4800761665665497 0.5126358290853940 0.7335444178852868  
0.4233675690011072 0.2706519322153115 0.2064955365386512  
0.9831594501313589 0.7792118988477928 0.9908097155863426  
0.9147010713206292 0.0255238031411058 0.4899701185912870  
0.9104167826247411 0.2766485745207898 0.4872328010427138  
0.9743780256267367 0.5245432552186893 0.9877912256434618  
0.4150870379994387 0.0223863853214259 0.2190128006727161  
0.4940478204730336 0.7696212497047920 0.6966474003114107  
0.3960457475083561 0.4372923683234661 0.6270110762955279  
0.5054538788572736 0.3583627559265567 0.1203592616024125  
0.9009233860170335 0.8673279425637019 0.0791410518169207  
0.0010383396994839 0.9371242832522678 0.5683062612882399  
0.9994096095348327 0.3630814643522185 0.5618276999174563  
0.8902934773844328 0.4383227387925710 0.0749734877439460  
0.4993497061613523 0.9357504817590198 0.1325966338837442  
0.4008835102308816 0.8536212882320496 0.6175772132658600  
0.4854493876897804 0.3798581387625332 0.7467289501471369  
0.4151307268135336 0.3990440635771257 0.2539571917940959  
0.9942479698468064 0.9099161958828472 0.9520300154996718  
0.9052180724963137 0.8954526889855039 0.4440396065512362  
0.9005173645500243 0.4077718516109351 0.4455550176168074  
0.9859720057875201 0.3926825618547461 0.9532236996903420  
0.4043417165156779 0.8911755260421955 0.2543883805257407  
0.4909692634846674 0.8975556497585684 0.7495321844323555  
0.3104179980573460 0.5368541493809326 0.6702288382483639  
0.5936463168253124 0.2724143435603091 0.1993456948592526  
0.8207380846369361 0.7767618044576470 0.9982973341149538  
0.0888370253662109 0.0239698093721716 0.4937939215613416  
0.0926995905316208 0.2747434205391295 0.5042728462219457  
0.8031498758357463 0.5273578619755515 0.0038146422324483  
0.5849292229970229 0.0228726682661258 0.2109604103980043  
0.3076823285272533 0.7868060785073606 0.7170289297189019  
0.2762530292793295 0.4372142734591692 0.5438658773129905  
0.6300659722897708 0.3573044289402557 0.0555516597876636  
0.7745852893825094 0.8592586443805368 0.1407310838639264  
0.1206630105833422 0.9496521581829963 0.6528677391490604  
0.1166404711395108 0.3590663375054050 0.6536758460093626  
0.7648852766562085 0.4387926216677855 0.1425488695485412  
0.6160358222513839 0.9599913292995363 0.0422351418585019  
0.2731900199053776 0.8624217181198683 0.5632538861846067  
0.3289109229984943 0.4663848126977362 0.3649913465250152  
0.5631410402161644 0.3292309877954847 0.8899461146648017  
0.8356845355288584 0.8266526091441744 0.3088878527565609  
0.0739029558582014 0.9809894738564927 0.8337980835123466  
0.0646461573800143 0.3217120636195212 0.8302330332978267  
0.8313334062945212 0.4708796952306024 0.3039353732048720  
0.5683890342247478 0.9779617361952782 0.8573058574881466  
0.3374901281450997 0.8292113950391891 0.3979857910475945  
0.2543944834879796 0.3563145106010167 0.3862986628845245  
0.6338570266741569 0.4428771863769126 0.9004521623628131  
0.7644813759153916 0.9395543486046364 0.3023784633288948  
0.1213411605469474 0.8580123513843660 0.8026309353791786  
0.1161885842605769 0.4438115537927371 0.8107207455065579  
0.7589067908712971 0.3584382127916341 0.3058104182236155  
0.6198585791976997 0.8593166006307029 0.9073584602737166  
0.2642472963159485 0.9422700452760217 0.4027772983730497  
0.4064894104999310 0.5338231635757554 0.2500616000001407

0.5028442122084201 0.2481374660855238 0.7637551767054043  
0.9010185506955984 0.7597240090093865 0.4437724606381490  
0.9856461135984143 0.0451202189459163 0.9425586765649946  
0.983925554744563 0.2572651050039337 0.9490886020587793  
0.8867081452904878 0.5433642127840930 0.4419873305783145  
0.4694748716789313 0.0314032050964378 0.7564042749488513  
0.3954371977278121 0.7560822000979707 0.2587038859383328  
0.7017941434196276 0.2377114199922718 0.3076600865410414  
0.1861460887359481 0.5577697489898054 0.7775823274776309  
0.1960877338937810 0.0567105804314776 0.3837519002870160  
0.7032596257985997 0.7563319389310957 0.9120917184570030  
0.6931804436361804 0.5628983224010465 0.9009752896248266  
0.2042945307965272 0.2343098866583283 0.4076569472623607  
0.1950839357232657 0.7454696534475098 0.8023302798870540  
0.6963414139363173 0.0534478821692259 0.3134937727579068  
0.5853618630019743 0.2424573051042297 0.3959615636907122  
0.3059135686919655 0.5428417930202303 0.8896803454220321  
0.0804114788268182 0.0612425909358261 0.2988196296079160  
0.8113818932230562 0.7428256257624405 0.8042424994588762  
0.8071574999260905 0.5581556912363819 0.8072545351424378  
0.0921708482128875 0.2511321085502030 0.3064607428951450  
0.3075296190165501 0.7336367024558861 0.9012647998401254  
0.5824620919714554 0.0581349490359114 0.4057556723651299  
0.6094111998432943 0.1476988685707858 0.2593985203397910  
0.2855982254740729 0.6560095032263660 0.7406696476021106  
0.1068198562914913 0.1501797047220555 0.4417789136649314  
0.7854575640646173 0.6529239535545882 0.9481461448053068  
0.5209963374874114 0.2608528009222090 0.5654827417786350  
0.3708730201895469 0.5259606830639745 0.0625650765993244  
0.0127447914911672 0.0258939934984319 0.1353682095275866  
0.8776885572302120 0.7742825046038551 0.6385788056393252  
0.8730228639168164 0.5316065313860734 0.6382859007303785  
0.0196333963395787 0.2704806597532531 0.1407825975917671  
0.3704299786110944 0.7681263780556193 0.0677970444764675  
0.5090160844456282 0.0225699979587527 0.5658966699624562  
0.4523890390833696 0.2361569040940763 0.3972302780519613  
0.4358123135622086 0.5670873423328876 0.9035055332159249  
0.9490230151322516 0.0582825339531137 0.3024750082808749  
0.9436493466257410 0.7431322890534586 0.8052275698638686  
0.9386558322056762 0.5648629573598204 0.8034092336814798  
0.9611910995642001 0.2359431814929699 0.3119105221819546  
0.4393448616670373 0.7535268661639215 0.8989216006130679  
0.4512701334511820 0.0673360408266175 0.4003520894288770  
0.4991078900556495 0.1414271906752368 0.6500278390467811  
0.3927467821138724 0.6462528936125418 0.1427678842106909  
0.9970797686380856 0.1497691848380147 0.0645546274590527  
0.8826262424861329 0.6530218522083895 0.5570226464325925  
0.4021193795111287 0.2325856838757203 0.6347476750651883  
0.4950547282008764 0.5629873919347796 0.1103350220042092  
0.8932807750257533 0.0675509836219333 0.0816840989056786  
0.9934463326458896 0.7267411874447326 0.5768814900424083  
0.9878248266917455 0.5745747612673051 0.5585324654038900  
0.8961045124908702 0.2347297871861994 0.0939016062876992  
0.4925907578777777 0.7340237754640143 0.1249379496267299  
0.3893247176435323 0.0716522258280870 0.6114803577957041  
0.2906730829546474 0.1609663952270660 0.6256791605179852  
0.5952119865483397 0.6487284924852459 0.1374232090600049  
0.7915438682547786 0.1533014163876987 0.0743496328709480  
0.0993900377719362 0.6468622582169241 0.5761229052966629  
0.2992363125556547 0.2788594655780326 0.5323633060101565  
0.6154628830290555 0.5275381666942088 0.0536609120006994  
0.7789762389491294 0.0325628720685633 0.1609844174643897  
0.1056728303100533 0.7682059738989162 0.6597836922189607  
0.0870498199025871 0.5232210505889868 0.6589712462872027  
0.7782841040813051 0.2754030859763111 0.1536756264330736  
0.6107132730181751 0.7693306804093940 0.0526485034113192  
0.2721372204695517 0.0388446216226712 0.5428792782884800  
0.3265239690557969 0.2488944252293769 0.3404498131084468  
0.5655728405743794 0.5562788109634724 0.8722441554842237  
0.8226663692878392 0.0551238825617521 0.3503692670055432  
0.0703077823649162 0.7387699878877348 0.8508283213699703  
0.0653973533087860 0.5629075691871184 0.8506673218194056  
0.8304782000075728 0.2461486073635525 0.3336096337353925  
0.5800028356063263 0.7346369695740592 0.8615692133912385  
0.3240388208558018 0.0571281751844425 0.3575476714356814  
0.3981405143482568 0.1490986431512557 0.2667578787380128  
0.4932982126387532 0.6442542219764152 0.7705335946545518  
0.8981218087290999 0.1502063717127279 0.4289306314148388  
0.9868328387620943 0.6521875462645069 0.9371415509346035  
0.5160906664081408 0.5844981194757953 0.5509706066697772  
0.4068834730524794 0.6740742257426923 0.6021663466923225  
0.5489213362697590 0.7196157569536068 0.4994670351242070  
0.2383085824202686 0.666808289035502 0.5363808998815414  
0.6088798974316783 0.6748151772081112 0.6669717124271335  
0.2911762704122235 0.6088790781519438 0.382770871557755  
0.3416123691105298 0.5980059829181731 0.4592839104219279  
0.6209774668120412 0.4708743373122816 0.3006427752403096  
0.2709318329664581 0.3411391509680147 0.7950898290554097  
0.1276812912614238 0.8258845503537887 0.4095213821791573  
0.7743723524795215 0.9737892789001338 0.9016790189362580  
0.7721842331104302 0.3282427645811743 0.8996661112796401  
0.1238782705688569 0.4726110358918730 0.4030648128868689



0.2793667944986277 0.9797296671118185 0.7955710197180891  
0.6268952041591713 0.8298432292274844 0.2886657645822865  
0.5212775239550312 0.4315212666029671 0.4565904253140817  
0.3775655709444221 0.3640582091497083 0.9488086932408001  
0.0272215345287946 0.8655137663723197 0.2543882069510251  
0.8782033920840975 0.9363634415849070 0.7503131792214864  
0.8739665739047420 0.3674364005023068 0.7495130053139034  
0.0196870750616401 0.4368880132146452 0.2537259624194131  
0.3718768284828039 0.9337380767244551 0.9548767768579555  
0.5247075261163958 0.8707195698407416 0.4413791965386064  
0.4712124197257337 0.4426782325207262 0.6726199578663022  
0.4302677769928237 0.3467866674614542 0.1626019918509936  
0.9763496586792410 0.8545559212173103 0.0376860052535480  
0.9246938621447661 0.9490745421411122 0.5318209019527828  
0.9220865187806053 0.3526468313468191 0.5297183477840426  
0.9664129134907098 0.4496114289045864 0.0358319836820802  
0.4233270868596486 0.9476598990339029 0.1707540221548859  
0.4771777181553638 0.8452493893989005 0.6578331582172708  
0.3184138384611399 0.4559773182173961 0.6441572316181563  
0.5827287033006544 0.3476598280604709 0.1531482909467633  
0.8244226371777409 0.8527238471835378 0.0453073892750361  
0.0795064808465538 0.9509180385109023 0.5479092657269323  
0.0784993574094380 0.3503792231977100 0.5473265065798045  
0.8126225392108869 0.4506564616823551 0.0456517680821266  
0.5776255760403081 0.9525263340504692 0.1490348206899062  
0.3245692046907199 0.8557890669694221 0.6572433044725758  
0.2663885147393179 0.4334120883634802 0.4228349194597502  
0.6295160924417332 0.3636846040054064 0.9332170304891981  
0.7704636020996962 0.8620731051662625 0.2630008777591879  
0.1292981514917802 0.9374476584073411 0.7734642962911308  
0.1220225768310766 0.3656004125641770 0.7757164212971320  
0.7638921163147607 0.4359919403624450 0.2651229728462407  
0.6249704326158662 0.9403114426501028 0.9236755644821771  
0.2708147653150038 0.8643003569892551 0.4407153518179266  
0.4032951839294134 0.4670804568463541 0.3190870561944197  
0.4963395503685498 0.3186130474860706 0.8254887911247836  
0.9023844910417392 0.8274362137374119 0.3756212485964990  
-0.0001662363716555 0.9761299453126238 0.8802066049722109  
0.9926691277038771 0.3256492683209403 0.8832567611526299  
0.8953945166585174 0.4749796210212179 0.3759881185163651  
0.4932984486199625 0.9650551010928821 0.8185013214292528  
0.4010547737840217 0.8244813204139524 0.3245873964781473  
0.6228753075708040 0.2258443445242796 0.2902812094193011  
0.1186371354389018 0.0726397115849393 0.4057037637379753  
0.7792864735165094 0.7319307405825427 0.9163722833019140  
0.7721202536770548 0.5749760372223852 0.9152870777913019  
0.1241210842324045 0.2282534291919189 0.4147598402195738  
0.2738207475298808 0.7307743379335729 0.7899280379049520  
0.6187080081676086 0.0702331473692782 0.2968041662856999  
0.5178383256867766 0.2729545032740076 0.4444030344727378  
0.3739907998731054 0.5195268805673238 0.9397449238520831  
0.0151532707844716 0.0222150609631058 0.2578638811046802  
0.8776444336652260 0.7795367664501369 0.7609271837322055  
0.8741187696022041 0.5250672747748956 0.7604231251645779  
0.0217292181481176 0.2789481854299171 0.2628822839123222  
0.3700853679128080 0.7771649459153134 0.9455109551525305  
0.5133903558846562 0.0243326865453320 0.4434529490317201  
0.4806695648342801 0.2209340505333279 0.6534316885841840  
0.4169473378764744 0.5680385282641125 0.1403535977390989  
0.9716274661236496 0.0724401663786822 0.0555668328812000  
0.9143312339437141 0.7282430221996143 0.5539695287412095  
0.9078159536204660 0.5754665083268474 0.5494069488726633  
0.9737487327099184 0.2280351392566742 0.0618497214875755  
0.4136878485982924 0.7254212123556888 0.1482435183023611  
0.4662415085093154 0.0669084036951708 0.6467602367229809  
0.3222031993779532 0.2366603484686483 0.6316469517599815  
0.5732227552368446 0.5697170232979907 0.1372733716984037  
0.8136601697894982 0.0743819847408693 0.0696984206633790  
0.0731688483367085 0.7256007289576820 0.5681507508200363  
0.0673472156020538 0.5704755198089231 0.5644233500936575  
0.8172588479865422 0.2310823433031806 0.0691091117038738  
0.5721342614090398 0.7274700751216892 0.1395459485674789  
0.3103638777074465 0.0811694019717018 0.6306129041584736  
0.2714543533760255 0.2786414413583488 0.4171781511907843  
0.6266518952801206 0.5219385971800785 0.9318243335352119  
0.7663042670773406 0.0202775906409855 0.2809411440570014  
0.1231834727349985 0.7775775928644850 0.7792610241522443  
0.1155164587934147 0.5226607256086722 0.7753774785417393  
0.7677857664613800 0.2793128928512226 0.2756730991111246  
0.6272553538984330 0.7792232344299218 0.9328166591566240  
0.2648346736412089 0.0233770556191148 0.4225392796241647  
0.4003091190837299 0.2269927460296546 0.3039119357332058  
0.4941435596545710 0.5687368252435547 0.8196401042926543  
0.8961197048784506 0.0718744024328311 0.3928837294119875  
0.9961128655501073 0.7289952907383682 0.8962493459041180  
0.9917488335233392 0.5751359742281476 0.8950084835768173  
0.8995423161755527 0.2279448201443161 0.3901018623201520  
0.3965144081155546 0.0728394771898043 0.3106709867376709

Structure 7 S=10/2

1.000000000000000

20.1473052208877697 0.0000000000000000 0.0000000000000000

0.0000000000000000 19.7681594983396742 0.0000000000000000  
0.0000000000000000 0.0000000000000000 13.2309279702280254  
Al C Fe H O Si  
2 1 2 12 199 94  
Direct  
0.2704919753568830 0.5715847516246599 0.7977426819982945  
0.4987049921359426 0.7299538532426504 0.8140275760042058  
0.1501822223980021 0.6329338458513457 0.2109669927065462  
0.3321033652734281 0.6198036517864303 0.6083466129962850  
0.4897241386857563 0.6654064166633090 0.6132222363050127  
0.4479532463681304 0.5745965416040579 0.5159384169575245  
0.4985674376927872 0.7410513757063791 0.4351726610873370  
0.5239108603179192 0.6646670788905203 0.4375728954738715  
0.2027312466645459 0.6468280311607145 0.5619438092477126  
0.2520266403801842 0.6507465563473153 0.4639129421797030  
0.6094261463969307 0.6925665312281158 0.7131120658561620  
0.6180745531474063 0.7074752791669807 0.5972265633624250  
0.3020076412687210 0.5995892183727352 0.3555520858035163  
0.1396590630018097 0.5796491775485032 0.1984124392405547  
0.2358619456717715 0.6270041377843407 0.3053602091645318  
0.1234623639264686 0.6601690893282584 0.2698134153759289  
0.1800279913019800 0.6608096585593453 0.1564698392089928  
0.7015485800858358 0.4755924007400814 0.3162692320982052  
0.1911507234328147 0.3267903283861786 0.8129157507587133  
0.2090930739250360 0.8227722505453058 0.3965369746585647  
0.6956795172401815 0.9712287977315645 0.8832592941922571  
0.6919440741279386 0.3226071452897101 0.8946263928830197  
0.2018877810270100 0.4819769934073589 0.3956792804786951  
0.2022015975574306 0.9665607899835460 0.8074288012788449  
0.7074459641732231 0.8203843384987638 0.3004982872816944  
0.5884917610148600 0.4666305122617669 0.4189551503512753  
0.3028342930607394 0.3423457043179073 0.9125610774041940  
0.0977463301775731 0.8332952399267585 0.2928667386623938  
0.8126723912373700 0.9731163185354738 0.7922987887317972  
0.8026693163401947 0.3348217325499001 0.7904847331505624  
0.0925207962918534 0.4642779206242942 0.2892064741401777  
0.3157187217615101 0.9824858016282477 0.9053771712119950  
0.5988134974630018 0.8455318286313682 0.4016410504747731  
0.5943810907062508 0.5412674517424084 0.2537020157138787  
0.3011209673024130 0.2717663992895276 0.7421942176863785  
0.101955590536022 0.7561399028168126 0.4573700609241607  
0.7931387307281789 0.0431881620689583 0.9604649882172904  
0.8032401168862496 0.2626122673383280 0.9592017976741295  
0.0889873441804032 0.5375767181639834 0.4561334022820869  
0.2919043253089207 0.0530675427902838 0.7398743571906662  
0.5940157957560672 0.7629043128562362 0.2442266079824737  
0.5999506870116964 0.4063265751227931 0.2422975283961056  
0.2842776467815074 0.4069131599098109 0.7381547467848029  
0.1076463257386674 0.8908367271010044 0.4727787571433770  
0.7993488769400978 0.9079958271823126 0.9642481257839510  
0.7902106080768494 0.3969124752174010 0.9666520257127960  
0.1060111734715115 0.4034942556418751 0.4670894828768080  
0.3154441483387225 0.9213964854831156 0.7265359845974421  
0.6136599930953005 0.8953060818778100 0.2157123250981303  
0.5225538764175524 0.4373612174718866 0.5855029800558140  
0.3760604790956631 0.3565270961906015 0.0766129761485022  
0.0279637869494502 0.8620061610404653 0.1296727993545768  
0.8764105873575856 0.9367071116684839 0.6271561204490563  
0.8736470056854616 0.3614567374995805 0.6280019342348538  
0.0186256562294230 0.4391107609711068 0.1292713796261750  
0.3722751157619698 0.9438246862481142 0.0781597317257401  
0.5284837793789011 0.8644956358526632 0.5660488828632062  
0.5194284490843002 0.3525966054879819 0.4284326074909516  
0.3911453585504854 0.4426916814015092 0.9219713134279248  
0.0210084554314993 0.9433671657898072 0.2914775782502148  
0.8801880352972099 0.8577428201018169 0.7914995086610517  
0.8797232894913148 0.4441611103568536 0.7889159838251086  
0.0145259533472584 0.3559858315322063 0.2901685141822058  
0.3544799395331755 0.8570864935174244 0.9260718457525683  
0.5133579091382086 0.9479207181498743 0.4055048249895511  
0.4548235080145225 0.4669771413731559 0.4192110150385222  
0.4315683527625929 0.3158600944787268 0.9054973787194972  
0.9670914262570831 0.8223346166859777 0.2982102868214437  
0.9455741937805925 0.9728196934427361 0.7884826832850940  
0.9338286215800348 0.323254055229366 0.7966913052667183  
0.9618969806176647 0.4775740538251302 0.3010811365255770  
0.4458691911941512 0.9547198077245130 0.9168427947655686  
0.4694038538973385 0.8230018583030810 0.3980395486390976  
0.4776271201544511 0.5152064102515487 0.7361672852142072  
0.4227332661465193 0.2765008662580954 0.2194828301851084  
0.9868764404657788 0.7776565880552496 0.9893630274476304  
0.9147057196754207 0.0233144325736848 0.4881792494597004  
0.9130541201361571 0.2758422540582888 0.4873021950171427  
0.9780959950345679 0.5246833928278104 0.9891031878346856  
0.4158171726480940 0.0250412298126501 0.2191966604255379  
0.4912404907839255 0.7675289056599151 0.6925482736950196  
0.3957134061414268 0.4333985536368695 0.6383043227805927  
0.5047339691260562 0.3588013126802304 0.1234870509216204  
0.9016754576600255 0.8648053871942029 0.0743908895916434  
0.0018780942555224 0.9367424232830636 0.5687653176242734  
0.9994241683965368 0.3625349993373108 0.5686931107819896  
0.8918611657209006 0.4406081649721136 0.0764677432280743

0.4996587212695979 0.9366333979677645 0.1347400123514120  
0.4021047360403473 0.8560116324823028 0.6159560305684708  
0.4903588305770235 0.3837773326848331 0.7576008063432165  
0.4153022544582529 0.4084520100658302 0.2505022060414531  
0.9950511400130162 0.9081520373819857 0.9483944470276359  
0.9070350111569645 0.8928886353591616 0.4442134002264628  
0.9033404966974123 0.4071076921443528 0.4472596419365382  
0.9841792092848944 0.3931744061281771 0.9501922973774509  
0.4043043232751310 0.8933350332499188 0.2557768769023803  
0.4919848367482811 0.8936461911253278 0.7534274264205408  
0.3094944629074248 0.5328355011009628 0.6897449226137117  
0.5929074931301416 0.2749382428917894 0.2067464681938433  
0.8199487891727064 0.7755993035210080 0.9937316343042518  
0.0894352720859789 0.0234640547915117 0.4934587204257921  
0.0894390610600878 0.2732375274567145 0.5045253965066990  
0.8034548608537011 0.5277347220013278 0.0026067125704967  
0.5845123408035330 0.0260934479543998 0.2083152370819717  
0.3121623426342486 0.7860840267336400 0.7197086070937679  
0.2782756554428352 0.4427377150190241 0.5474045723859675  
0.6304834489545212 0.3593319200101868 0.0627663563936327  
0.7768180255165347 0.8562842309869607 0.1404740828462784  
0.1231547341135766 0.9471929266900653 0.6493776413823766  
0.1196026387937048 0.3579006519147416 0.6519306472599756  
0.7683271169165220 0.4437299760932981 0.1491298911791383  
0.6157134052618223 0.9592519533234792 0.0422549388900464  
0.2743776837725557 0.8584661017986562 0.5627270725384205  
0.3276590823573352 0.4725710265404018 0.3638357445311117  
0.5623894249449929 0.3262571238052945 0.9007694370939238  
0.8367317454366918 0.8232633043621286 0.3103086539374021  
0.0742508088454598 0.9779760712055126 0.8286338008712774  
0.0628095708839974 0.3242435558559238 0.8253701568137531  
0.8312507779216707 0.4766568442420820 0.3159193740934884  
0.5684700674898674 0.9778109728573465 0.8567827252862961  
0.3382627616457999 0.8266928353663727 0.3954179157415497  
0.2587209473313327 0.3604081317126605 0.3921067491773273  
0.6309449761440592 0.4420533090435262 0.9037066952998898  
0.7703100714278295 0.9386773284103933 0.3005583718262483  
0.1280053923669859 0.8568266757957136 0.7998477602102541  
0.1240228448902519 0.4424497357239648 0.8091437394479774  
0.7671610967381011 0.3594438391980621 0.3073268913563139  
0.6230728063228044 0.8602520889655556 0.9049634740886308  
0.2699545696647246 0.9421122287598940 0.4053277555252922  
0.4147129588764629 0.5434585423875237 0.2680194327973884  
0.5013170904136004 0.2502784689494590 0.7692285464968296  
0.9056955672818783 0.7570771502309039 0.4418928310061879  
0.9895242558796183 0.0435956553454365 0.9413818512908293  
0.9869913667526818 0.2577148066800477 0.9487101230991491  
0.9018827530468414 0.5432051193566356 0.4459810267616616  
0.4676231536768983 0.0270099990795517 0.7543317375229059  
0.4063844397214691 0.7566004278099953 0.2619440282158500  
0.7037249176697229 0.2421423505993019 0.3099795107937421  
0.1863466777913116 0.5622454703910635 0.7986087050562460  
0.1969577590233297 0.0528683861681124 0.3821333205919661  
0.7041522892933332 0.7553043089622080 0.9020576721607070  
0.6909754321819441 0.5624010194167802 0.9042006380139911  
0.2050257294289328 0.2395997182268499 0.4140283849920076  
0.1988579882650103 0.7426305613274073 0.8001611507300118  
0.6972853797880962 0.0497756853178721 0.3098797807934073  
0.5884165215691481 0.2400432562214534 0.4015947052602446  
0.3056073344276775 0.5468354978294049 0.9100154212727052  
0.805311678543182 0.0627296079591929 0.2999785981126846  
0.8144694282893596 0.7411686577971179 0.7993800351575843  
0.8007984578220381 0.5526129191506871 0.8038850675647050  
0.0944883814267375 0.2485217783701022 0.3070770088212822  
0.3091835401610152 0.7337618722041058 0.9048476206142495  
0.5845142795909023 0.0608205810354216 0.4040728925704070  
0.6148847830137811 0.1494886602579105 0.2590127226654297  
0.2913097867942079 0.6533994884245067 0.7472632235844194  
0.1119361328720189 0.1494018170924201 0.4440528019267120  
0.7855917528326831 0.6517586426161921 0.9418220797862294  
0.5253109229236058 0.2588680107798529 0.5723593476330384  
0.3771475651321987 0.5253547760496746 0.0770662530438428  
0.0153800427207533 0.0260709603701768 0.1350096747141261  
0.8830736924475623 0.7746000440310169 0.6363368534006992  
0.8726342343566562 0.5310230883634820 0.6393056716082822  
0.0227170749588218 0.2681776423109715 0.1408064591675898  
0.3737874109738010 0.7687936288346583 0.0710674794583162  
0.5130031837478738 0.0262554119041860 0.5665752083182419  
0.4557782853717173 0.2361994604769407 0.4051137066577942  
0.4355258704086016 0.5681433667345285 0.9100137562388474  
0.9492675021716588 0.0568010273238570 0.3010353716678680  
0.9466856813180967 0.7421793885853528 0.8041872833762309  
0.9303353581315866 0.5672815632573835 0.8118729688921243  
0.9634113086599111 0.2338011982923187 0.3119133905977888  
0.4404535221377576 0.7557646235559704 0.8991565983520247  
0.4529328174933894 0.0667718607623791 0.4009904595028849  
0.4986437011937370 0.1415377523614854 0.6612095190123637  
0.3949787738088884 0.6480603872211742 0.1502685353967116  
0.9994578402668192 0.1491017149766934 0.0611313038021042  
0.8889372964894006 0.6518369026426494 0.5595207592242647  
0.4039268922623154 0.2342614087432668 0.6338544189155995  
0.4989899032342331 0.5673181115357481 0.1194712782982791

0.8961762994327790 0.0664998820135932 0.0792496784823673  
0.9988123690978362 0.7261217181451076 0.5749624535290254  
0.9930056825490572 0.5720628029357154 0.5842683268069501  
0.8988587219261218 0.2346384603229469 0.0929623744569041  
0.4967368437793032 0.7310968058467158 0.1196417703700744  
0.3913920644964336 0.0719549835972037 0.6078791611349866  
0.2931295884389195 0.1615810201961770 0.6254326380207053  
0.6020496824836374 0.6498111315227447 0.1378471198324996  
0.7946950040947846 0.1528389091085538 0.0741508489979555  
0.1042698147675471 0.6455248425964335 0.5705777335762957  
0.2970249500539777 0.2835098234627662 0.5437691519413111  
0.6156111811919074 0.5262119003738293 0.0575566184810343  
0.7818757151511758 0.0317894780211580 0.1591036166832330  
0.1111272915153072 0.7669965457414627 0.6563251027626741  
0.1051030157116492 0.5223337094217180 0.6533254586638312  
0.7812396158382187 0.2748516694027135 0.1549475699003550  
0.6140364067002364 0.7684939687745020 0.0468748464866832  
0.2727120496669750 0.0401787918053799 0.5428288840679909  
0.3287523010837430 0.2491393269048072 0.3551807350851605  
0.5639150807188158 0.5565644476695298 0.8762528271386845  
0.8230775634747420 0.0567107872834779 0.3493636369251933  
0.0737849204820456 0.7391083841582482 0.8472718869479122  
0.0590511780986431 0.5565873540292249 0.8357753828761781  
0.8327924420446418 0.2439669666015611 0.3345140953552264  
0.5802659443348821 0.7374867510119125 0.8542610943824397  
0.3252037120622319 0.0590767437379115 0.3582389078217835  
0.4001626337919325 0.1521352134104390 0.2719043326341233  
0.4919415129416032 0.6445578636479660 0.7711195615348228  
0.9009107911343409 0.1488350836252490 0.4304160594274611  
0.9928103855404050 0.6511466219688546 0.9345322761847588  
0.4936047067903295 0.5869254480247454 0.5383282006707991  
0.3977109928192080 0.6791098227276990 0.6106726061883261  
0.5263955096213359 0.7083273805530580 0.4725752967587957  
0.24812934933353779 0.6578802659990339 0.5406838127647567  
0.5993302265711726 0.6751986781230205 0.6451116601067391  
0.2720240167740464 0.6384560566986613 0.3525577855840950  
0.3588335724543777 0.5756457872666435 0.5091113092699476  
0.6213179569721591 0.4723295091534165 0.3072029571761940  
0.2703662802647179 0.3370592728729479 0.8002850908378244  
0.1290640657532362 0.8259364976506436 0.4058558960001574  
0.7748980170664408 0.9737074941958093 0.9011629301038072  
0.7719065966589780 0.3289256875865065 0.9038956101936658  
0.1222994392261609 0.4713843974030616 0.4032881803140859  
0.2808045400377838 0.9801949633313309 0.7943825974663533  
0.6281584252372377 0.8311402321586988 0.2888397028842340  
0.5215281591941675 0.4316279912238177 0.4636988789389806  
0.3754193758636982 0.3648913530155343 0.9545992666219814  
0.0283590145668632 0.8655808886717001 0.2518950934352175  
0.8786359619206862 0.9352540432671642 0.7495284311883724  
0.8724838686612062 0.3661936673048966 0.7500938006491505  
0.0215196813026297 0.4338310518065230 0.2511477687179878  
0.3721802269585583 0.9342961082010794 0.9564049297431532  
0.5278803442173154 0.8715762036864014 0.4444858892192534  
0.4714098100156429 0.4432732077121360 0.6796005424705192  
0.4295458354925206 0.3502749396755837 0.1677230265290578  
0.9775844273658448 0.8531611940394226 0.0347259774135377  
0.9254977629719854 0.9473644931701587 0.5312573199062335  
0.9228577216070699 0.3515445049736515 0.5320778306857777  
0.9677619005157737 0.4495077634749863 0.0351764137118575  
0.4236429633993143 0.9499155200010438 0.1719533793067328  
0.4776641981955308 0.8447781619041208 0.6576828922142544  
0.3182336266778231 0.4541083183781242 0.6518341427336584  
0.5816917026833539 0.3496865989741612 0.1589346239794007  
0.8246914163583642 0.8509483023551290 0.0425849363286879  
0.0802093010192197 0.9499572034614295 0.5461621686081529  
0.0780691825536900 0.3492163370923180 0.5484251552502556  
0.8138055951218222 0.4523089770705552 0.0489430282518809  
0.5779389567748305 0.9541988596424517 0.1498841772197953  
0.3258799533348870 0.8547140260214646 0.6570219364309452  
0.2676272241865867 0.4388441156088221 0.4265149443745835  
0.6286023203170960 0.3633549904210479 0.9401191272570617  
0.7730584297732983 0.8606579125310424 0.2626148004273651  
0.1318398112053908 0.9364780310607316 0.7702759281614968  
0.1241103543946865 0.3639425353009850 0.7742138276816727  
0.7669535945276464 0.4381811342740488 0.2716279883941543  
0.6257008261699719 0.9410778670212546 0.9233154789645350  
0.2729833465872931 0.8633912818691570 0.4402002922229766  
0.4037403605790506 0.4718502956833037 0.3255201256338200  
0.4962887646245583 0.3199738646168810 0.8328986602233111  
0.9044004851834525 0.8253510814619148 0.3748037115859207  
0.0009374565111658 0.9747281567929764 0.8775449854439150  
0.9919335499736185 0.3257848999676040 0.8813880019448843  
0.8996783259414135 0.4749245698333789 0.3787327634415701  
0.4934836371550470 0.9628258453229387 0.8191803796311434  
0.4033927941746686 0.8262885154234023 0.3253310494493895  
0.6252032251853763 0.2274270587237577 0.2940504775803964  
0.1203813832829131 0.0719298273059771 0.4059668673179456  
0.7800401851738740 0.7307514646313750 0.9100283305189569  
0.7702039394988904 0.5734491670637671 0.9136151903604909  
0.1255047027961398 0.2282613715016716 0.4171931952629907  
0.2780448437715091 0.7296252278554868 0.7915570356331130  
0.6206886664989520 0.0713657426835128 0.2947162752285765

0.5219541325819427 0.2721938783426108 0.4514625722397735  
0.3750707069097834 0.5211921442345326 0.9534304354630184  
0.0165163099583959 0.0222694837366384 0.2575135127737944  
0.8810396765423590 0.7786701281555267 0.7588465030674301  
0.8708238591303687 0.5236980580764086 0.7614885923813923  
0.0242507203497057 0.276390620696926 0.2628952138863496  
0.3715279633683418 0.7779383560946079 0.9485293827079208  
0.5164782312583114 0.0261942625164300 0.4440764856639325  
0.4816232926112504 0.2214258580356886 0.6590358034623428  
0.4216714818563425 0.5709836594135500 0.1530250942713527  
0.9745541892927559 0.0716148751758668 0.0536462452858952  
0.9196523263819280 0.7273129505378936 0.5530790113134938  
0.9144727106084320 0.5742309729249364 0.5569423957126072  
0.9764247821620621 0.2274028299181861 0.0606173222639231  
0.4186617496704987 0.7261343228910199 0.1496738616478023  
0.4673208347455422 0.0669305347551628 0.6480514540644464  
0.3238630355602422 0.2373276434617567 0.6367962037591288  
0.5777580819683849 0.5714574125670918 0.1423765025184902  
0.8165872658820255 0.0738970740797137 0.0681374107681079  
0.0784700224298064 0.7243278965394031 0.5648333698982118  
0.0721748097682496 0.5689078674511784 0.5666418551642528  
0.8198167355355531 0.2308613691860096 0.0695423077144292  
0.5763770060726939 0.7278155392408243 0.1359812175282581  
0.3126374324515990 0.0818196671888586 0.6294780282223296  
0.2726544850255102 0.2828613530614696 0.4265137864665468  
0.6247554575793385 0.5212361069733163 0.9352717547865149  
0.7687034011047209 0.0193774624855496 0.2788983053750426  
0.1278467486944234 0.7764138819691414 0.7760717645802652  
0.1201447438028476 0.5215714022327880 0.7756879002911045  
0.7714880366246260 0.2800893265604903 0.2769701577921978  
0.6289632694607676 0.7795396887141305 0.9265602708145042  
0.2669117416807398 0.0233054316447051 0.4227746585758926  
0.4019349064399579 0.2292016346751261 0.3139106006325582  
0.4925439846527223 0.5699656867721099 0.8237331787490620  
0.8970378995673920 0.0709829077625899 0.3922544930597539  
0.0001185162891479 0.7281434995988483 0.8939161968802355  
0.9906554358793930 0.5739042306577666 0.8928796368095655  
0.9020809780176555 0.2265042850196227 0.3908893886199820  
0.3979560932153600 0.0748906475986617 0.3122165533002889

Structure TS reaction CH4/4→7 S=10/2

1.0000000000000000  
20.1473052208878016 0.0000000000000000 0.0000000000000000  
0.0000000000000000 19.7681594983396991 0.0000000000000000  
0.0000000000000000 0.0000000000000000 13.2309279702280005

Al C Fe H O Si

2 1 2 12 199 94

Selective dynamics

Direct

0.2713251216345043 0.57083499399785577 0.7910231450805298 F F F  
0.5002945811056208 0.7291687943966778 0.8150375894819177 F F F  
0.1813800984522445 0.6352889740389145 0.2410374347504529 T T T  
0.3295724950944745 0.6291660432870927 0.6072700889515801 T T T  
0.4925383101751208 0.6631579412882331 0.6136009693706868 T T T  
0.4492868814509805 0.5775451797915849 0.5036395830891394 T T T  
0.4980879219326084 0.7427826988070194 0.4382501617771482 T T T  
0.5255927823298947 0.6673254429592035 0.4337904309416203 T T T  
0.1986504479106799 0.6492233043147877 0.5573933431338816 T T T  
0.2543082157152412 0.6428439315587227 0.4638414774327089 T T T  
0.6119601456301211 0.6876881265904089 0.7104938039382773 T T T  
0.6199559665732508 0.7062525758617113 0.5956750456967583 T T T  
0.2933673910670151 0.5710182979869742 0.3580440623430832 T T T  
0.1896200524277702 0.5807645727561663 0.2324674671495970 T T T  
0.2283571863250629 0.6600013028283414 0.2613323329613451 T T T  
0.1448281830097145 0.6441008335477605 0.3010484875116788 T T T  
0.1631945960843737 0.6562193118781465 0.1695077745620708 T T T  
0.7013923788151644 0.4774692744358120 0.3121984327139060 F F F  
0.1920218488790653 0.3315350616476849 0.8122253919801352 F F F  
0.2084023325192987 0.8219648205728447 0.3999035252528600 F F F  
0.6955531889543423 0.9698369483016123 0.8841924519589384 F F F  
0.6924769792062762 0.3218710274054644 0.8913207372984360 F F F  
0.2034852858103449 0.4810781198165586 0.3922362555632546 F F F  
0.2017036953935332 0.9639854683392670 0.8091093299256613 F F F  
0.7072430741478897 0.8200385426320835 0.3020060418237236 F F F  
0.5887045511361393 0.4665614603381485 0.4157369714647885 F F F  
0.3043154385320221 0.3441778084283911 0.9091635970521352 F F F  
0.0975331420718888 0.8342170560161506 0.2954840483168084 F F F  
0.8126037691007042 0.9743756244603716 0.7934976162047604 F F F  
0.8043092813041923 0.3337021101309858 0.7889709056950167 F F F  
0.0922484302730311 0.4647407910096391 0.2903853506497924 F F F  
0.3146296555152119 0.9814507982619247 0.9070488881567229 F F F  
0.5983322212876985 0.8451341856495915 0.403604424396934 F F F  
0.5922391348709795 0.5406089121396960 0.2505672830962098 F F F  
0.2999596010712224 0.2750018984890872 0.7377886188731679 F F F  
0.0994524226483549 0.7575610005503748 0.4608141603707239 F F F  
0.7918740544936611 0.0433993299973068 0.9619437152262407 F F F  
0.8030929784969203 0.2627275767824884 0.9589473378544042 F F F  
0.0931832755013176 0.5380350198343251 0.4583448630983966 F F F  
0.2897185684094836 0.0527619865003430 0.7416450430452386 F F F  
0.5941327667192908 0.7607009146452128 0.2486372484990227 F F F  
0.6011962406587443 0.4056672178051670 0.2396639578108761 F F F  
0.2860649730839242 0.4106003236527442 0.7359129698522011 F F F

0.1083490326922103 0.8919417753364840 0.4752579162095500 F F F  
0.8001892435553941 0.9084043827519181 0.9649903805662916 F F F  
0.7900590959459279 0.3974124296648966 0.9625604030359582 F F F  
0.1086998755794681 0.4038316726145084 0.4678181466821698 F F F  
0.3162526739254616 0.9220268752686138 0.7275835002128517 F F F  
0.6122172100743981 0.8930201092505072 0.2167340463489253 F F F  
0.5244845556496429 0.4367971259679990 0.5828463400254194 F F F  
0.3770955576312289 0.3573240846409362 0.0739799493183497 F F F  
0.0280078023948036 0.8617393265258713 0.1315206160923594 F F F  
0.8760452479568954 0.9376224353599056 0.6281751308191730 F F F  
0.8747701233057157 0.3631256365318123 0.6277071915107371 F F F  
0.0173991760793015 0.4411938290749688 0.1307625033049860 F F F  
0.3720145635891043 0.9426552973071125 0.0788682713172904 F F F  
0.5276854078201154 0.8655022272975401 0.5667025115422177 F F F  
0.5190145381751847 0.3528570033533711 0.4246650110363532 F F F  
0.3941437106244123 0.4427285372651966 0.9185751319299413 F F F  
0.0201091635747233 0.9436508913628572 0.2926651844044983 F F F  
0.8785282988701582 0.8583587194931823 0.7922356101831483 F F F  
0.8791144607820485 0.4449243902120941 0.7893094179172095 F F F  
0.0127882421299219 0.3575403964146204 0.2905468181053621 F F F  
0.3561475056334231 0.8562861398197512 0.9256493162704373 F F F  
0.5125591080424670 0.9475483200141923 0.4049277211981206 F F F  
0.4547469312952117 0.4671872122439993 0.4181954802067125 F F F  
0.4325440069590769 0.3151306070426827 0.9035179773743991 F F F  
0.9668610529412689 0.8226230428075496 0.3003893134209932 F F F  
0.9457077461997443 0.9724090458981038 0.7894025290158737 F F F  
0.9357280143027111 0.3249958064268270 0.7956669110148837 F F F  
0.9622899744027933 0.4802058179498374 0.3044153525032698 F F F  
0.4450762041957503 0.9561172725249065 0.9173564074354132 F F F  
0.4688152716980198 0.8222514090630497 0.3992552546628545 F F F  
0.4816519110306743 0.5144288511490345 0.7345024596002503 F F F  
0.4229734874752893 0.2734939243338630 0.2132235676268479 F F F  
0.9844085827492250 0.7785550875459535 0.9910300056704813 F F F  
0.9143643412948350 0.0249177822440600 0.4900216641788333 F F F  
0.9120176852320228 0.2767793850989264 0.4872000326885200 F F F  
0.9757527919135924 0.5242396705388614 0.9877940366867222 F F F  
0.4157481721025036 0.0234597283561229 0.2205503482327842 F F F  
0.4952929843188798 0.7685457988729567 0.6949067111041529 F F F  
0.3976763880206633 0.4355843885182225 0.6342002130565305 F F F  
0.5053068507271945 0.3584469222429973 0.1221275933542358 F F F  
0.9014223089829585 0.8666383731236067 0.0780763707856806 F F F  
0.0014265146988279 0.9375638741347601 0.5690698835493535 F F F  
0.9996585630207235 0.3638747874851518 0.5641778484769233 F F F  
0.8911710087480174 0.4388166829061007 0.0756270592421870 F F F  
0.4995625035286864 0.9361204964385124 0.1342228201256503 F F F  
0.4021888613939311 0.8535471077960040 0.6193297635002324 F F F  
0.4897713909893540 0.3824238987499271 0.7536617609047269 F F F  
0.4150420632409890 0.4037295031683357 0.2523614437353459 F F F  
0.9947154483324638 0.9091224422016566 0.9509524104471438 F F F  
0.9062250482650782 0.8946897080934519 0.4446228106582879 F F F  
0.9016137946853746 0.4079366847088437 0.4461424326363996 F F F  
0.9856104465870956 0.3924761052297541 0.9520302571191976 F F F  
0.4046640946352369 0.8919693364092467 0.2559269925720074 F F F  
0.4917192639305128 0.8956641077642828 0.7538370688704319 F F F  
0.3128828095538978 0.5361184157534922 0.6812081983223877 F F F  
0.5935742298204971 0.2741613371184286 0.2042251878999721 F F F  
0.8209367852633207 0.7764049668405519 0.9970869464383014 F F F  
0.0890276031969606 0.0244519154399896 0.4941059638927854 F F F  
0.0905887590998518 0.2738728825837526 0.5046205507545949 F F F  
0.8038304183189737 0.5276103446227509 0.0040558674863931 F F F  
0.5848208455067123 0.0240674448047145 0.2110826751011174 F F F  
0.3092066687865156 0.7866765595926068 0.7210120660588615 F F F  
0.2807699297436557 0.4432266206640918 0.5435548556167262 F F F  
0.6308487999550039 0.3582091228330029 0.0599966802794754 F F F  
0.7756713553964971 0.8579876533752469 0.1414691580164842 F F F  
0.1216853915236484 0.9490968639376618 0.6517845915090277 F F F  
0.1177530263653779 0.3582575160625296 0.6532640107288188 F F F  
0.7663187697324787 0.4406392234577936 0.1453527392986373 F F F  
0.6166547251087451 0.9584307439551694 0.0445176306195663 F F F  
0.2748734152603589 0.8595620485118545 0.5639362342570635 F F F  
0.3286881147731435 0.4730876075322712 0.3606974528494078 F F F  
0.5630280227200331 0.3268440465080076 0.8971945260349585 F F F  
0.8364962383325434 0.8253768245491244 0.3102470567452684 F F F  
0.0739397068812480 0.9801550502496426 0.8321647510657115 F F F  
0.0642084457818086 0.3214184163327474 0.8287784484622094 F F F  
0.8315165638480266 0.4734447163311089 0.3082250346610564 F F F  
0.5683025950275962 0.9784378914065499 0.8599659347626698 F F F  
0.3375873214132667 0.8269260200539392 0.3961584262001594 F F F  
0.2603060845184118 0.3596109522318187 0.3889238924515155 F F F  
0.6328270681002550 0.4417561463969193 0.9023607221754375 F F F  
0.7674703749866367 0.9395090476588237 0.3022329099745917 F F F  
0.1227995771537778 0.8576200475267299 0.8015828258908542 F F F  
0.1175171771585966 0.4426867611620366 0.8108560475063911 F F F  
0.7622481239601342 0.3588926824381531 0.3068658667459729 F F F  
0.6211242627444378 0.8599763528390980 0.9060907473764246 F F F  
0.2685567075266704 0.9421019920061866 0.4060147616726439 F F F  
0.4189784654726978 0.5391552165595428 0.2613099571200124 F F F  
0.5022357079456228 0.2494229205009688 0.7668172333457619 F F F  
0.9037918059179546 0.7589068491514368 0.4436623106874578 F F F  
0.9868021382564365 0.0444198921473742 0.9427715124980836 F F F  
0.9845220929270937 0.2570721171235775 0.9489953797208983 F F F  
0.8929759248352696 0.5439017573751670 0.4431041832238023 F F F

0.4692007333937909 0.0295237501551071 0.7566510263874591 F F F  
0.4049822494065509 0.7555869033730573 0.2631189690381532 F F F  
0.7031163332593309 0.2392477441726442 0.3090568175237181 F F F  
0.1881576439839492 0.5568912845051059 0.7878940451137524 F F F  
0.1967728354162119 0.0538255946305171 0.3833764624750842 F F F  
0.7043069584541470 0.7568428614360414 0.9079133708202747 F F F  
0.6935924096827861 0.5613721492012615 0.9001718816381938 F F F  
0.2046185702946417 0.2394821949611199 0.410171727112090 F F F  
0.1964410914917423 0.7452427186695516 0.8050609928066947 F F F  
0.6969180502876924 0.0519224366332551 0.3130563640059734 F F F  
0.5874171345615977 0.2401076291660758 0.3994139408370572 F F F  
0.3070503431703955 0.5453820910763554 0.9023540085972357 F F F  
0.0808828741060239 0.0622120551384668 0.2995314542552165 F F F  
0.8130741664683399 0.7415773381319184 0.8029292957036489 F F F  
0.8066974339907276 0.5573754624694160 0.8067988553988386 F F F  
0.0931735394887312 0.2503319106461390 0.3065922900846019 F F F  
0.3082587450346495 0.7336408097597982 0.9058883911763118 F F F  
0.5835380923836482 0.0607073201268875 0.4057831353762396 F F F  
0.6122625312967003 0.1485175788059863 0.2582344102459970 F F F  
0.2866239807280877 0.6552108801004977 0.7461153373238787 F F F  
0.1108753260119997 0.1502239728332384 0.4423312205823322 F F F  
0.7849925558767836 0.6526641763022383 0.9471782950792047 F F F  
0.5238390848669283 0.2600343805048908 0.5694068092178313 F F F  
0.3770901097840280 0.5261851247648792 0.0718281284248832 F F F  
0.0138946117790297 0.0260436635895260 0.1358133412529838 F F F  
0.8800163639059377 0.7745049610532320 0.6380696605647387 F F F  
0.8726466176847438 0.5312621682211329 0.6383332061947087 F F F  
0.0209435792598995 0.2697065661220250 0.1406839407362597 F F F  
0.3743820568548415 0.7680040147798408 0.0711212512971642 F F F  
0.5113928529793981 0.0244428514731538 0.5674292046603995 F F F  
0.4547085832617128 0.2368726541629371 0.4015926662021343 F F F  
0.4365259499586145 0.5686773634076090 0.9055819143214592 F F F  
0.9496175363774242 0.0578331485392738 0.3029383369940177 F F F  
0.9450950160407174 0.7431356345530986 0.8051354692493646 F F F  
0.9376952314978553 0.5649191046306328 0.8045126891571215 F F F  
0.9623230192288048 0.2349301237408810 0.3118643648600212 F F F  
0.4396752395922476 0.7529159688011191 0.8978002282709170 F F F  
0.4520816509888732 0.0665633246039334 0.4023130739601726 F F F  
0.4988908658260698 0.1417557438200561 0.6559116481592042 F F F  
0.3962985842003235 0.6470847034207026 0.1504728164897813 F F F  
0.9982174150106573 0.1494774765213762 0.0636201607019586 F F F  
0.8852653016145382 0.6527805409430698 0.5583071953580614 F F F  
0.4033915643260855 0.2341699382832445 0.6338805049017395 F F F  
0.499908213013312 0.5671492462484551 0.1114005681182277 F F F  
0.8944622712959074 0.0674353893206003 0.0820254988899904 F F F  
0.9960414928313170 0.7263274458972120 0.5775201157912520 F F F  
0.9899546759373692 0.5736573377192116 0.5700260310823779 F F F  
0.8972742595352088 0.2344279792003405 0.0944760223893013 F F F  
0.4968483426325960 0.7318052602568699 0.1224340118931764 F F F  
0.3904072199705979 0.0714513551079392 0.6113851167486644 F F F  
0.2925063209586227 0.1615697910454728 0.6278285969830719 F F F  
0.6020514783053486 0.6498787684953271 0.1369403359628265 F F F  
0.7926552771219519 0.1532727424901950 0.0743569261472601 F F F  
0.1019269568121146 0.6461052382401178 0.5727303284024003 F F F  
0.2976754397192778 0.2815438603311335 0.5391764191069939 F F F  
0.6188779260695014 0.5269628892015561 0.0561661929139206 F F F  
0.7798423286112737 0.0325429750601032 0.1605393530030312 F F F  
0.1086994558206555 0.7666704956483628 0.6596239038841745 F F F  
0.0950281155388382 0.5231333340197324 0.6576411782342859 F F F  
0.7795533112909183 0.2753555628839877 0.1544362964557280 F F F  
0.6141703986073068 0.7705651329774454 0.0518813593807010 F F F  
0.2724067141922859 0.0402506718729825 0.5439741316032141 F F F  
0.3281498115172923 0.2481611970952073 0.3492527816876105 F F F  
0.5658633234022759 0.5559672475281019 0.8765106790758850 F F F  
0.8231633034376600 0.0564259116569730 0.3498602870203342 F F F  
0.0715231675104278 0.7385958017828287 0.8505945423703167 F F F  
0.0647858777110457 0.5617032723760857 0.8472665006046611 F F F  
0.8318064697272737 0.2454769039896831 0.3342293808436452 F F F  
0.5805722885905809 0.7356895056467323 0.8608488642304266 F F F  
0.3248173877683413 0.0584756536464894 0.3589499845842283 F F F  
0.4002010629469126 0.1504756228944757 0.2703391737975807 F F F  
0.496840597884313 0.6439144516205388 0.7695303021763920 F F F  
0.8995912268838353 0.1499819354921854 0.4302427785201886 F F F  
0.9882974848175436 0.6517042410450031 0.9365498840216802 F F F  
0.4926566712661966 0.5855904042762532 0.5363925072542486 T T T  
0.4012168046716198 0.6788759449382553 0.6266602281522466 T T T  
0.5255306954704935 0.7087901988577485 0.4741707051082145 T T T  
0.2443860238238216 0.6596955565304583 0.5370776673588580 T T T  
0.6011630022243750 0.6727652788923919 0.6416202446380197 T T T  
0.2977057789593189 0.6189000158575411 0.3770771462454334 T T T  
0.3544819581575140 0.6028129661878268 0.4865308068482719 T T T  
0.6211638024330668 0.4724827135802627 0.3037883628156379 F F F  
0.2710472129379937 0.3404964425653390 0.7973705266427800 F F F  
0.1283378154813093 0.8262909752675540 0.4086531528676431 F F F  
0.7746831292936633 0.9738167645445515 0.9022514991372290 F F F  
0.7723920573678456 0.3285241810469159 0.9016365761656147 F F F  
0.1238283393125457 0.4716982369257607 0.4030453178014994 F F F  
0.2799230324220190 0.9795430457595415 0.7959119062109750 F F F  
0.6277842743578859 0.8298877345646005 0.2911263703903089 F F F  
0.5219856500538214 0.4315498564167015 0.4610732070021371 F F F  
0.3770613774063492 0.3653335983574308 0.9518546637411802 F F F  
0.0281171014090091 0.8657606601305616 0.2537789320571733 F F F

0.8781863237468102 0.9358894986280291 0.7505481219091976 F F F  
 0.8735599594563368 0.3669899677215227 0.7497098225197547 F F F  
 0.0208079244172339 0.4356626688759704 0.2525811064519274 F F F  
 0.3719900808954151 0.9337727790502299 0.9569819286953418 F F F  
 0.5271412207687973 0.8714956108353604 0.4451972109490541 F F F  
 0.4733072573819470 0.4432095936327087 0.6767954147306057 F F F  
 0.4300650062031295 0.3484574209766507 0.1653025606396241 F F F  
 0.9769878776278631 0.8540663967563162 0.0371319428546073 F F F  
 0.9250183424302634 0.9486749244370714 0.5322167534895286 F F F  
 0.9226442552299829 0.3527255089293675 0.5305244923897590 F F F  
 0.9672090706743504 0.4492695927044537 0.0354689991389492 F F F  
 0.4236376781231712 0.9486945894818462 0.1723060830951795 F F F  
 0.4784086351037189 0.8450065807171612 0.6598634591201744 F F F  
 0.3202973846479225 0.4562639295627022 0.6480156521566300 F F F  
 0.5824359662564476 0.3489614525178837 0.1566163057219825 F F F  
 0.8247705814338460 0.8521041093410275 0.0450072999216573 F F F  
 0.0798061695774308 0.9510986125540342 0.5474732385191103 F F F  
 0.0784685525189914 0.3499228817064903 0.5477383123178257 F F F  
 0.8133535454088161 0.4512390364043242 0.0472884989512323 F F F  
 0.5778559048945127 0.9528212528524449 0.1512489166910740 F F F  
 0.3257058238050377 0.8548686279066899 0.6588474975221885 F F F  
 0.2689021781847529 0.4378005503610964 0.4230459192460643 F F F  
 0.6295126330510570 0.3628921025010285 0.9374360411662224 F F F  
 0.7719573371831601 0.8617309249809324 0.2637107589012189 F F F  
 0.1299789563846616 0.9371294435992255 0.7724777146726680 F F F  
 0.1225925831762140 0.3645149379677122 0.7754173207634238 F F F  
 0.7652160802037784 0.4369198092378923 0.2679401468504139 F F F  
 0.6254344148534443 0.9406396462092133 0.9251995877112194 F F F  
 0.2723176584040274 0.8634641051833185 0.4414595799943939 F F F  
 0.4050654702229153 0.4699066845073858 0.3222696066614503 F F F  
 0.4968536951824092 0.3193294744041921 0.8300113158805686 F F F  
 0.9036905404146651 0.8268191676457946 0.3758822919644018 F F F  
 0.0001727922761745 0.9755840693169375 0.8796855663724301 F F F  
 0.9924844672329982 0.3252501760040900 0.8825530261621779 F F F  
 0.8974278121230483 0.4753084468702937 0.3767152182170435 F F F  
 0.4935326739538723 0.964312222331826 0.8207019967726126 F F F  
 0.4027679536455651 0.8253888518979267 0.3261840506593359 F F F  
 0.6243590215853629 0.2263416289096014 0.2923818169567909 F F F  
 0.1199562287628311 0.0724308738373267 0.4059705086924126 F F F  
 0.7799346633186559 0.7316064165665068 0.9145812868002494 F F F  
 0.7722860648321586 0.5744915857941137 0.9150993569892165 F F F  
 0.1249669987946760 0.2290028867866738 0.4156772631272503 F F F  
 0.2751650051124557 0.7308985965441437 0.7940287982094247 F F F  
 0.6198173982953890 0.0710299365979949 0.2964078168225797 F F F  
 0.5208955683367691 0.2725380516193496 0.4483561445504236 F F F  
 0.3762755171244407 0.5211774094093826 0.9483530083591489 F F F  
 0.0160954633015464 0.0224460841271892 0.2583184958379903 F F F  
 0.8790696474905744 0.7791947349400701 0.7604825943497104 F F F  
 0.8738852617327950 0.5245820078760346 0.7605172259240405 F F F  
 0.0227755140570167 0.2780412607182114 0.2628061601603946 F F F  
 0.3717347658349439 0.7767984808880684 0.9485224481127474 F F F  
 0.5155351742460041 0.0255639911196042 0.4449735611775480 F F F  
 0.4814299159220710 0.2215227658690253 0.65644077072075014 F F F  
 0.4229589232776689 0.5700842964074724 0.1482512446976259 F F F  
 0.9727715665349166 0.0721505006441561 0.0555185196728658 F F F  
 0.9169821037211250 0.7279678707142523 0.5542830675012524 F F F  
 0.9105371308975307 0.5751694923806099 0.5524005041391931 F F F  
 0.9747847769872138 0.2276873263901393 0.0616990392639138 F F F  
 0.4185809439280419 0.7254911468359424 0.1508679955811232 F F F  
 0.4670161853250505 0.0670065027349622 0.6484841381574142 F F F  
 0.3233507041828005 0.2375032906470125 0.6351687666281549 F F F  
 0.5780954186284291 0.5714268621983010 0.1388055502620986 F F F  
 0.8148926984337734 0.0743881267930320 0.0695906075482711 F F F  
 0.0757877161888700 0.7248586359442513 0.5674118016205654 F F F  
 0.0696115796446364 0.5696849048122132 0.5654697706401279 F F F  
 0.8184224845721033 0.2310583976224336 0.0697063690316284 F F F  
 0.5763932668031657 0.7278509187663005 0.1387065129655909 F F F  
 0.3115922422581008 0.0816295677462335 0.6317312994832420 F F F  
 0.2728957323736054 0.2815692185781984 0.4222729469135018 F F F  
 0.6274174875435392 0.5209424844356221 0.9338555194066487 F F F  
 0.7675357100147266 0.0202212726642301 0.2805639499547610 F F F  
 0.1247579095447335 0.7770402420106990 0.7793143762270418 F F F  
 0.1179263367231869 0.5217851667516697 0.7767969533848529 F F F  
 0.7696000096220175 0.2797020466357836 0.2765137414823329 F F F  
 0.6286131027538886 0.7798179017710680 0.9310435022550152 F F F  
 0.2663305684375246 0.0233287898837133 0.4239214924616306 F F F  
 0.4016826257354893 0.2280712691583204 0.3095938333805393 F F F  
 0.4952447252033707 0.5694009430825915 0.8221676994451457 F F F  
 0.8967282151468510 0.0718568500506009 0.3932194124333463 F F F  
 0.9974107426292846 0.7286115381004663 0.8961130362876304 F F F  
 0.9920996446084942 0.5746084196130568 0.8943137678555004 F F F  
 0.9009537098214651 0.2275879739958881 0.3906720045021146 F F F  
 0.3975651497095072 0.0737966269180745 0.3126795039949144 F F F

Structure CH4/2 S=10/2

1.0000000000000000  
 20.1473052208877697 0.0000000000000000 0.0000000000000000  
 0.0000000000000000 19.7681594983396742 0.0000000000000000  
 0.0000000000000000 0.0000000000000000 13.2309279702280254  
 Al C Fe H O Si  
 2 1 2 14 200 94  
 Direct



0.2720379464006037 0.5718273802816429 0.7900287100630220  
0.5011547865049834 0.7292500481739755 0.8190224613527934  
0.1559440900750420 0.6435055201194606 0.2751106644398750  
0.3446207365058707 0.6285346701712461 0.6038492806141582  
0.4756636418902578 0.6597786234159303 0.6206415552439020  
0.4534074846324019 0.6009350059046072 0.3242812560499702  
0.4466794721691394 0.6819041173769574 0.3138074891761095  
0.5022161124397362 0.7461849072635598 0.4779510206963522  
0.5118202743381020 0.6736385566164760 0.4378167646056234  
0.1995727752628041 0.6319054741235722 0.5852684388809239  
0.2386022812705248 0.6263296288813583 0.4805299412430539  
0.6093207202994294 0.6494020269249318 0.6991794179109538  
0.6071457844190030 0.6718577719833619 0.5858059040195838  
0.3886217524418722 0.6485816617122873 0.4153030635536506  
0.3098019420722561 0.5759813552279239 0.3712287121617512  
0.1838133877127038 0.5962293539854006 0.2665673948511706  
0.1899145854602436 0.6865021950961817 0.2677922897898308  
0.1323489806353458 0.6447463474667122 0.3496863964270612  
0.1176077364155958 0.6462097182844667 0.2165089772062220  
0.7037218978206718 0.4784322183501025 0.3123782298650367  
0.1919781649675419 0.3242598868652407 0.8102153014732033  
0.2093925128655596 0.8198130118176051 0.4009330276950027  
0.6973439007352804 0.9654735979072813 0.8833859827886563  
0.6923927788625039 0.3250358735491496 0.8921063110340515  
0.2055210874224084 0.4803324030218037 0.3947834023964414  
0.2027132342507977 0.9667603296424372 0.8095279360933175  
0.7063473430236878 0.8181983669249479 0.3009679377984650  
0.5922671162690991 0.4664923212846896 0.4175018411461183  
0.3040928139878262 0.3362558840586952 0.9089543423267806  
0.0974865595886665 0.8322498293596418 0.2982457872796307  
0.8147780044552081 0.9751890640955874 0.7953633702240569  
0.8044018316762981 0.3324280060177912 0.7892037234069874  
0.0941295166333627 0.4642395576145388 0.2927021850338478  
0.3167613075454723 0.9851979496803654 0.9027764620420085  
0.5980125214901113 0.8431049118920952 0.4047263702746127  
0.5925015375780776 0.5387851601809031 0.2501934831837311  
0.2998581743489079 0.2670140718170026 0.7372381775226525  
0.1011048640857208 0.7572401029766910 0.4655235595480676  
0.7902181608200499 0.0426233284329355 0.9647568245257206  
0.8008004613924864 0.2612505960371785 0.9591118230200953  
0.0948072388800004 0.5341334322890283 0.4645910510657001  
0.2891499462806046 0.0545515868757942 0.7367447601039054  
0.5920593785643297 0.7589591845738126 0.2501150327661443  
0.6040505259712956 0.4041881841556206 0.2427402132178888  
0.2869330768693066 0.4024399923041513 0.7353356069256212  
0.1107120085784620 0.8923445849571622 0.4753115756791312  
0.8035572724413745 0.9082020771496755 0.9655951261165636  
0.7929834881530342 0.3963794962368671 0.9626544804284276  
0.1118434967493945 0.3998257193558549 0.4664541725490668  
0.3154291915723292 0.9240908571419311 0.7226091473105537  
0.6097997338718966 0.8913031420372658 0.2186174599445732  
0.5242188251788775 0.4431742435637448 0.5807683827668103  
0.3776770013321267 0.3551930277209338 0.0714208199484907  
0.0276908063639481 0.8589836996845771 0.1339402363060374  
0.8772692385424663 0.9371012468701337 0.6294285569024075  
0.8759200400172049 0.3620819901509554 0.6285534480359586  
0.0175044547647476 0.4429094063391302 0.1332989309660907  
0.3726510350391559 0.9459378818767208 0.0767832893919782  
0.5278162407332661 0.8649678602280374 0.5664090018259538  
0.5182055489788360 0.3542846842861678 0.4264645097224344  
0.3883460884481055 0.4403444344328929 0.9152426257514378  
0.0219014844384738 0.9429910210306771 0.2928532849336960  
0.8768630173591507 0.8569517403310822 0.7923911608007090  
0.8771474519050418 0.4447867386805002 0.7893279355100323  
0.0145802122038520 0.3568757505128055 0.2901117784990278  
0.3542569951115249 0.8594248944891903 0.9253660292553172  
0.5130876355017512 0.9465627687313083 0.4032285035736946  
0.4602663340755139 0.4707698030482491 0.4089749143058212  
0.4332926584862165 0.3155432953803166 0.8987531010568220  
0.9666987275214511 0.8224308261973069 0.3036920181949959  
0.9475809960027317 0.9691809449856926 0.7905346074780947  
0.9359121564650261 0.3259183520135246 0.7978574825078381  
0.9646380806044015 0.4797316215437682 0.3094591430092867  
0.4460895601133035 0.9567947182982974 0.9156745123824542  
0.4682755956821005 0.8216327375558191 0.4005063151706055  
0.4867653641575245 0.5109518445508102 0.7426145857114879  
0.4228286722650892 0.2738822001620992 0.2142380585210090  
0.9813128641985638 0.7751222455543803 0.9951833352817649  
0.9165633449335036 0.0253767888071341 0.4928196408465721  
0.9129380707388874 0.2753092155371739 0.4882820627165319  
0.9723516285101671 0.5253635173378731 0.9911193517647392  
0.4187461540522254 0.0216172126560002 0.2223945899523366  
0.5042464748903034 0.7702465701690056 0.7012510443177215  
0.3993835476794821 0.4310793094018807 0.6398798819218541  
0.5039937307843979 0.3630050699500320 0.1285961151272155  
0.9004302866053566 0.8636829067242058 0.0835287574821030  
0.0026931696159912 0.9361056813622616 0.5685406504856144  
0.0005861257649455 0.3637709884038605 0.5623734202290565  
0.8902999888805979 0.4397395096760988 0.0809707408481070  
0.5011776791659173 0.9371621998622436 0.1278790061517831  
0.4054207819176479 0.8527259439831452 0.6297718585583207  
0.4962155544348318 0.3793973106433360 0.7479393305842300

0.4068585505136767 0.4038825546875240 0.2517968290536574  
0.9926590023453674 0.9054539474852427 0.9538275654342699  
0.9057209597869924 0.8959058044240478 0.4449927745889091  
0.9009577527390402 0.4059738463554829 0.4461336639927693  
0.9836158455333928 0.3936497733124175 0.9556662188618412  
0.4085581993219067 0.8882745135214822 0.2480802699619361  
0.4980145004173758 0.8986181093028975 0.7538526987335029  
0.3153463884289169 0.5305353946960181 0.6909084735230132  
0.5918571775773875 0.2741222974452697 0.2008138332981955  
0.8175347686683354 0.7756814600639472 0.0011452715840926  
0.0909392199578333 0.0245821434981224 0.4984465795375229  
0.0901571709572819 0.2712719546940794 0.5071596620745266  
0.8017676337975371 0.5268312810962134 0.0056508735471674  
0.5855905314481599 0.0231716419550066 0.2108164303187496  
0.3034207010927961 0.7904755699880289 0.7257556128582621  
0.2833388801379681 0.4429585677351285 0.5472848191633756  
0.6285013391283739 0.3608145837778939 0.0595089335545750  
0.7734963652441196 0.8606946396953064 0.1419359307806091  
0.1221895891041254 0.9463048311031578 0.6539752177358964  
0.1180758510464644 0.3582070495862277 0.6534537108630858  
0.7645064810237767 0.4382316238576935 0.1446445950195649  
0.6216269283192478 0.9568680076651844 0.0472862385485546  
0.2823435537551111 0.8566845505655423 0.5582406142083096  
0.3319244499756261 0.4827461359984534 0.3702088391290613  
0.5633618057289748 0.3232152060501336 0.8975339884091375  
0.8359381948772915 0.8284984013398341 0.3089683984365503  
0.0752970443640079 0.9727903453435874 0.8361366888708897  
0.0644117269412783 0.3284496122055319 0.8304282711273618  
0.8340426153848586 0.4700155543552100 0.3034770762524549  
0.5702517312338842 0.9806438705650687 0.8659866437540733  
0.3374225754937496 0.8217003407634688 0.3829739931919519  
0.2712390717200633 0.3631445590772499 0.3860216308521605  
0.6262764893575919 0.4423336655316303 0.9000236758889126  
0.7617608248089752 0.9398628734147965 0.3045520850572829  
0.1334951803716285 0.8542727179464316 0.8020607955306257  
0.1313196289008478 0.4432895971015964 0.8089422761671939  
0.7608473343895881 0.3578116040429790 0.3077339182783914  
0.6178870071917358 0.8587399699789103 0.9090557536916348  
0.2730704399309245 0.9386580436675989 0.4001189286709726  
0.4189519800257915 0.5395186033904984 0.2553937594920993  
0.5025295473338168 0.2465396893701871 0.7656283348258830  
0.8995134030992470 0.7600851537161953 0.4442301672652270  
0.9898413109908198 0.0410620622842091 0.9435791331901995  
0.9881752392884531 0.2582232678422889 0.9482178452392309  
0.8891575602320859 0.5416554067597041 0.4430440391812928  
0.4731388790072945 0.0318591615531471 0.7577108445537415  
0.4134744577066469 0.7526974962427019 0.2568881866722962  
0.7020825142623850 0.2378531868021212 0.3035290941788815  
0.1874313651206641 0.5650603841130983 0.7802297659957719  
0.1964951798090229 0.0470757471606043 0.3801897574650704  
0.7043106659598116 0.7588467547853981 0.9000731947680917  
0.6940920761957905 0.5575121311278264 0.8934484248046386  
0.2042502262716566 0.2481238484747698 0.4073379447222510  
0.1952932572237141 0.7341157924808895 0.7997439029801535  
0.6971618468129375 0.0561810563188997 0.3105651064039265  
0.5879145483997059 0.2427795564299243 0.3970521037847188  
0.3015944209696195 0.5444735946628474 0.9059923935519775  
0.0781846214731887 0.0637271087059124 0.3052152461122973  
0.8168537843909542 0.7375524596800086 0.8077870817597401  
0.8111752759836081 0.5608120060565830 0.8107373681443261  
0.0910183636969966 0.2469785436634502 0.3089603877652867  
0.3045792961643866 0.7370075412353141 0.9088642173181061  
0.5832659448312068 0.0603067942110091 0.4046866444355205  
0.6085371370055757 0.1488593168560561 0.2571741759083030  
0.2957221546903833 0.6546911825587837 0.7503128837968420  
0.1195497674278012 0.1493841295217946 0.4441530419799765  
0.7794514502960438 0.6523330336381862 0.9515534979677269  
0.5254652214398150 0.2605916993429989 0.5688576596922124  
0.3754524619780196 0.5232787483986272 0.0707101013147572  
0.0152522978493414 0.0269357024838977 0.1376960250576907  
0.8795460627351016 0.7722454037604227 0.6397485633225388  
0.8721173418378187 0.5316231214133067 0.6393007142061353  
0.0218076138040476 0.2681701947514259 0.1408870547977707  
0.3752372326591678 0.7697884303101024 0.0687134958806744  
0.5131086793305170 0.0220927550298922 0.5671303442448945  
0.4553938400286721 0.2376520044002721 0.4016826185345738  
0.4328699061810476 0.5655022309612181 0.9068875965310841  
0.9471040136839430 0.0545609423946727 0.3022590090142852  
0.9486001461167387 0.7445487860834927 0.8042387873127502  
0.9428370258452177 0.5610956226872355 0.8016469546497126  
0.9595189217898401 0.2360642517096699 0.3093248101603367  
0.4361517177356335 0.7556924158167336 0.8924499488163140  
0.4513493114244640 0.0650841544443387 0.4045731276680248  
0.5001967741390453 0.1410312735201744 0.6491485929392508  
0.4033382375475890 0.6468457036128422 0.1418235417085343  
0.9996145740817450 0.1488360709423069 0.0593057570182591  
0.8832585396633111 0.6518745416872704 0.5549850900080896  
0.4045829978077979 0.2334721728096653 0.6304730683459279  
0.5021534540887993 0.5606707062836463 0.1070317248969117  
0.8959818633138056 0.0668314162314036 0.0787179600152170  
0.9942758460188008 0.7246366219456940 0.5723691802049236  
0.9882731324364079 0.5725788126294776 0.5647398652272633

0.8986443106262787 0.2339234145025964 0.0896309091054065  
0.5010854923994194 0.7346930715094454 0.1095070151481533  
0.3921810309361074 0.0681115763898388 0.6108122471307951  
0.2949178812230318 0.1594493796258147 0.6145961626100535  
0.6006843874056420 0.6484293758083101 0.1380405264781732  
0.7938902325240673 0.1525124670099404 0.0769921229046759  
0.1000243018703592 0.6444137021101839 0.5757163830003823  
0.2984913668188268 0.2829539334758420 0.5389907340691104  
0.6236128208391833 0.5271527046651099 0.0561361501311889  
0.7837726561016385 0.0317880839741821 0.1641704202939187  
0.1034064305648924 0.7649273651666469 0.6643915178204850  
0.0890335692677658 0.5226460100624625 0.6643563487543949  
0.7827202006738329 0.2754724973969263 0.1553145876001265  
0.6243339895641605 0.7698126810345781 0.0580846615862606  
0.2747743753639291 0.0362861585935589 0.5392172660697212  
0.3284767479513661 0.2455465886447672 0.3499659821859344  
0.5643810056146888 0.5614705401683251 0.8839784481434766  
0.8220111008059829 0.0538432157555105 0.3566181496424573  
0.0733132327246086 0.7413414917137638 0.8593007476599942  
0.0679764738541238 0.5549322584040876 0.8584725019112632  
0.8295848494742667 0.2443150567503965 0.3386082800592244  
0.5773133081477320 0.7314502812169082 0.8786352569258735  
0.3244399827689903 0.0577083072112213 0.3538277420926834  
0.4026105478678829 0.1496415299360136 0.2706375700585736  
0.4901749077242784 0.6441024877073011 0.7747248325482062  
0.9004395587734016 0.1490578858376491 0.4291711478793784  
0.9894958658892162 0.6502906393144665 0.9334527692195654  
0.4277460068610856 0.5838350908236133 0.5812463452314589  
0.3939944539986596 0.7072788310215893 0.6172014937376530  
0.4591038120355131 0.6446004142158457 0.3600819714951100  
0.5247127845486800 0.7037198981837383 0.4958417360646735  
0.2425597008899929 0.6215924310837712 0.5544415132550315  
0.5897554246962803 0.6386859786865472 0.6336567087624979  
0.2973159469973026 0.6246940489304228 0.3705756770248670  
0.3425373514238923 0.6546957083301886 0.4455419016786163  
0.6236366238807234 0.4720180739420483 0.3047363432922415  
0.2712478567771763 0.3328966864376208 0.7965393529761104  
0.1294137623319988 0.8253069493290521 0.4109414411334804  
0.7760053772020041 0.9729042986604540 0.9034090427195662  
0.7724571864307084 0.3282727059325797 0.9020460128216844  
0.1258622964841279 0.4696077324463438 0.4056406145455199  
0.2807211708542861 0.9815740893103208 0.7925531977594998  
0.6267410566610957 0.8280586150568585 0.2920260130786999  
0.5239152275035892 0.4331353438280997 0.4601484446808652  
0.3759042977274962 0.3621954823236883 0.9490720592973733  
0.0284372095895235 0.8644601673585395 0.2561525917546050  
0.8790204364824056 0.9346760255914245 0.7517761090570629  
0.8734200764545788 0.3666538322959888 0.7504586760978551  
0.0224405934113836 0.4355763181406945 0.2548866571562267  
0.3724587775537925 0.9366484057478854 0.9547102919904376  
0.5270870136616861 0.8708127916716180 0.4454365810682729  
0.4751617975302512 0.4429897520502142 0.6781237679852636  
0.4281319678510307 0.3488012972732200 0.1660151448105462  
0.9755319532497224 0.8509108653645092 0.0410316873567209  
0.9261273429002491 0.9488652027856253 0.5335201333859154  
0.9233032205978525 0.3515302390934786 0.5308713121068575  
0.9659574392888496 0.45038848788779102 0.0394873213217989  
0.4257150100052204 0.9485334800685230 0.1686789072172271  
0.4826518849744908 0.8448086529187203 0.6646818325123188  
0.3220884168338616 0.4528481175454052 0.6541974931773634  
0.5817746701766747 0.3502164070236468 0.1575508140048002  
0.8238863208111181 0.8515833412011999 0.0476801730892330  
0.0812484745258038 0.9502579705041330 0.549105909801225  
0.0793302420429931 0.3481975962891105 0.5480342244853217  
0.8129365135288144 0.4506181461903421 0.0486228905074079  
0.5792316159535453 0.9519841303655976 0.1508643465667405  
0.3275331459848834 0.8543523753008808 0.6599574096712563  
0.2725316584400392 0.4403624631459318 0.4270751757317414  
0.6276627167151148 0.3636390507026417 0.9367788174931034  
0.7697431608648263 0.8627045224794211 0.2642274302574960  
0.1331184694037157 0.9342070337245142 0.7741476141736964  
0.1260350044867904 0.3648308594419926 0.7751503625381290  
0.7658418928073880 0.4353827974513712 0.2672109179323005  
0.6268340657359687 0.9392764784280374 0.9272856097863209  
0.2756343857329711 0.8600954823993208 0.4366377559616587  
0.4052195695677294 0.4707399821493641 0.3209117200411151  
0.4984547441658292 0.3174315177956263 0.8268519657678379  
0.9023030266862618 0.8279622034454043 0.3765681486186619  
0.0012161920576358 0.9712695761979877 0.8819641659860202  
0.9929655246308482 0.3277289676441441 0.8842032815495710  
0.8976513459939622 0.4734346555788977 0.3768271104127064  
0.4966320154505139 0.9662725127105211 0.8218916704515266  
0.4059284803884178 0.8233400149222245 0.3211458475354966  
0.6229812157875487 0.2266086535309653 0.2892752610237830  
0.1217287898491891 0.0709668886948551 0.4080910597371885  
0.7787141392799720 0.7310480528261378 0.9160449284811953  
0.7716823739069361 0.5741193756533950 0.9160082541843142  
0.1263510670619792 0.2290647406413260 0.4167356733917498  
0.2756827507799423 0.7289481537946335 0.7943600570061579  
0.6191746044553820 0.0716676377276902 0.2952998467591368  
0.5214704555849969 0.2736110150744988 0.4481505389485678  
0.3714277948402809 0.5185437472096678 0.9465593494016058

0.0157125547613268 0.0219691815826092 0.2601015544622680  
0.8803306335565505 0.7776503472832798 0.7619859186318604  
0.8756783014715093 0.5246518657652837 0.7612744382650403  
0.0222694831726211 0.2770039035739011 0.2629030402691683  
0.3694458653291652 0.7797451121310722 0.9456796991221869  
0.5158621416867493 0.0242829721014311 0.4446361218773561  
0.4824495282640923 0.2205548346478866 0.6538443316415380  
0.4248959363771007 0.5679122418765034 0.1390800560431898  
0.9746083598122235 0.0712100087200690 0.0545207628672399  
0.9149366212606391 0.7271064670828493 0.5528690498784092  
0.9086626712857183 0.5743055482218518 0.5507286970075493  
0.9765572950618256 0.2271662239461724 0.0594645242810052  
0.4235551538551168 0.7264005917001625 0.1398972841750358  
0.4689684276323059 0.0658332277887070 0.6471645224042786  
0.3244688967138064 0.2352464183581216 0.6310205536178339  
0.5799290627291680 0.5693216533117056 0.1377774948202468  
0.8161695074416491 0.0735924192214137 0.0709968617323908  
0.0742076665214318 0.7232744178183176 0.5694157907089614  
0.0678508920029928 0.5678771650555247 0.5683637881862498  
0.8193503072102587 0.2303184969600069 0.0692762848884649  
0.5795584221566886 0.7276518664091355 0.1375681504282931  
0.3131086648393792 0.0796100791187098 0.6258464096785289  
0.2754462352471807 0.2842571845359039 0.4212602706059903  
0.6266238957519972 0.5215699242689659 0.9328100921577305  
0.7669270371015918 0.0205189810381067 0.2830514137569063  
0.1265577534120155 0.7737739462571520 0.7816141930772662  
0.1207354215465476 0.5224797682436098 0.7788396964243293  
0.7693146833378250 0.2787843764892723 0.2765836173369739  
0.6294971240197859 0.7789966632572914 0.9347409799924811  
0.2677168276904288 0.0196436528092363 0.4192543315912923  
0.4024125802228238 0.2272576023773568 0.3100512724295579  
0.4933651837215617 0.5693122835598262 0.8266517839598218  
0.8965335797213224 0.0704307988932694 0.3950377886773828  
0.9982483199662953 0.7282171502514205 0.8980911269967524  
0.9938106203012700 0.5722990080484616 0.8959038118807015  
0.9001972532247510 0.22696172988624153 0.3911944396019254  
0.3985776748395727 0.0727356075982089 0.3125010018835711

Structure 13 S=10/2

1.0000000000000000  
20.1473052208877697 0.0000000000000000 0.0000000000000000  
0.0000000000000000 19.7681594983396742 0.0000000000000000  
0.0000000000000000 0.0000000000000000 13.2309279702280254

Al C Fe H O Si  
2 1 2 14 200 94

Direct

0.2739226603085728 0.5728976184043358 0.7838277300466783  
0.5041430974160462 0.7290831274012974 0.8228891228221572  
0.1391366541950192 0.6428877672863897 0.2083516310762498  
0.3438637168130092 0.6523204572584879 0.5907142045406764  
0.4775612487547569 0.6553352238360057 0.6273325988183026  
0.4604523735577824 0.6048682918729146 0.3311695215954811  
0.4563938866485940 0.6831307804806049 0.3111161503196713  
0.4990626338527084 0.7443232509414589 0.4854218473146265  
0.5095246826992854 0.6727465000902864 0.4346235516022885  
0.2157406354338616 0.6225083176971603 0.5712564585858858  
0.2535331613701717 0.6166815289069233 0.4616315637898009  
0.6073703420297563 0.6390879880674417 0.7006160074808130  
0.6061298857595272 0.6657803893835902 0.5887348984920773  
0.3912640440901868 0.6883189892591959 0.4417485085605607  
0.2734073031295569 0.5675327530892028 0.3277665934304620  
0.2171104194535904 0.6194829999849183 0.3013801642935408  
0.1615678539509398 0.6923778242362981 0.1965544373939702  
0.1022607207336018 0.6362508324802335 0.2676555021430164  
0.1460781196008516 0.6033014328172531 0.1521602263108027  
0.7039668577636015 0.4764764775490710 0.3148970026099406  
0.1900225834100579 0.3221731664406149 0.8143642178597043  
0.2111654937455176 0.8206708558250172 0.4022961047952290  
0.6986455611694887 0.9611283804495321 0.8826772268736429  
0.6924561088430277 0.3212197006418284 0.8964931335046553  
0.2051285720119268 0.4742729168176547 0.3957187705187766  
0.2040553434470184 0.9638538089845544 0.8114819143523681  
0.7066061413771569 0.8180986480095777 0.2997909179946472  
0.5919922141672391 0.4665627911514507 0.4187364054918876  
0.3027814594491812 0.3319787379759583 0.9126672283764112  
0.0988885220945295 0.8317465706747683 0.2988977836195496  
0.8158381423364975 0.9745341068151454 0.7960698604391172  
0.8021960726904186 0.3341058793475671 0.7893163952010627  
0.0941851164830226 0.4638808763713831 0.2916683479056242  
0.3175095750842891 0.9851537579146384 0.9046519367033511  
0.5986723798912955 0.8423082932791267 0.4048607741896831  
0.5945275614652010 0.5379793410842362 0.2505596147071346  
0.2959188081651982 0.2585342062753720 0.7438965571187843  
0.1042974995426549 0.7548979713834798 0.4635020663053734  
0.7889766305056334 0.041440777225707 0.9652454475429266  
0.8040850248993519 0.2621475227521173 0.9585761410978330  
0.0971791152443379 0.5351393345982299 0.4616338328953969  
0.2881168881438709 0.0541952573929164 0.7383923885653566  
0.5926708270611477 0.757391915341705 0.2516381852176524  
0.6030860188859380 0.4031709097717610 0.2450566470399131  
0.2882179285024514 0.3928940867264105 0.7340896088828845  
0.1106016388893267 0.8900733244644015 0.4775243009900894

0.8065928853680584 0.9077700177350402 0.9666917723918673  
0.7915616580045490 0.3969777701358841 0.9635106067976673  
0.1064894877419983 0.4000349812416974 0.4666252826311029  
0.3182802233109061 0.9251500171366719 0.7242855616268585  
0.6075687707014338 0.8898068330990423 0.2186970409611552  
0.5240028670612276 0.4448908720804463 0.5819537278689921  
0.3770085477557840 0.3580194661496005 0.0734813955660087  
0.0296675674198657 0.8582186217822080 0.1348020970417290  
0.8784874411335623 0.9371286314333350 0.6301574441022877  
0.8748206505485572 0.3609737140295762 0.6297474814610721  
0.0173678815794192 0.4426650860954029 0.1333097848467680  
0.3743491776597153 0.9445112467630438 0.0769437658598637  
0.5296585616224129 0.8617889858079336 0.5672537582159580  
0.5163295338226769 0.3553281382750275 0.4290859791594415  
0.3769519778967095 0.4433120965957431 0.9162602507212786  
0.0225821593185451 0.9422922198434235 0.2936646498355687  
0.8782318934383919 0.8564255033001806 0.7925413784398977  
0.8783870726328534 0.4444417537907897 0.7896988128603135  
0.0136296124691526 0.3567062674281319 0.2898506673220090  
0.3512046312749361 0.8581576021947697 0.9255662570775186  
0.5126655391134177 0.9454368896085985 0.4081129479376286  
0.4600551972836627 0.4736774483286649 0.4110016540792683  
0.4326488044189774 0.3224588079784598 0.8999639198953633  
0.9676883785465543 0.8218419956857093 0.3042308551724451  
0.9486110117211042 0.9687840230798028 0.7916751093845681  
0.9330019303248724 0.3236640366390925 0.8012908061655899  
0.9648684601101897 0.4798564303561268 0.3098051619570834  
0.4460010812090114 0.9525127734832918 0.9140787740034906  
0.4685116298624554 0.8200293955446499 0.4019998286895787  
0.4808472260898952 0.5148243700994324 0.7370324238049614  
0.4183000600982051 0.2762626627109417 0.2179159264055967  
0.9843102645386118 0.7747375236466645 0.9952417595622560  
0.9188982417330660 0.0252807852580860 0.4938873193828989  
0.9126887540643013 0.2749976349764038 0.4886157932571993  
0.9745447359346601 0.5241907895759154 0.9897075648749036  
0.4187994972987026 0.0214411014041699 0.2229280627126021  
0.5075035165125138 0.7694378660100316 0.7046013081371943  
0.4001233793147485 0.4254853046873427 0.6409320980933236  
0.5039805927533932 0.3598696060527133 0.1289571762312732  
0.9025704782103477 0.8621660487321863 0.0850386338855737  
0.0042238144989813 0.9363178222800476 0.5710403264639066  
0.0000919868472719 0.3608796136015853 0.5698173153123420  
0.8903104139105223 0.4402402109004321 0.0802554221722878  
0.5040790375355482 0.9432394756453224 0.1222005889056883  
0.4078224247956985 0.8512338775987679 0.6343709588576210  
0.5012548038223856 0.3845438204460014 0.7542371578368107  
0.4108516588972729 0.4076518984071706 0.2515867799343507  
0.9940109511381459 0.9054222607510430 0.9551165682738897  
0.9079076968003520 0.8956270791836245 0.4463433245939387  
0.9036973352094619 0.4062085731456522 0.4490870027912171  
0.9831502536018549 0.3920884469382551 0.9567438259372054  
0.4177799897665541 0.8874590813349110 0.2444153698685402  
0.5028833536090750 0.8992549263886876 0.7530586944855138  
0.3163011386946769 0.5220141533489812 0.6992453691558488  
0.5909396556361429 0.2727215879215001 0.2062188259872334  
0.8208308604481879 0.7746855440123949 0.0001469825575526  
0.0933897223939117 0.0227998704786603 0.4973205898087311  
0.0906458924134831 0.2712044152447545 0.5094733245409395  
0.8021280678923990 0.5274164611530205 0.0062841803156165  
0.5893858620910946 0.0228726087699007 0.2147422151230373  
0.2991124345449795 0.7923582257730482 0.7163904846219730  
0.2831912522139084 0.4382809473388916 0.5498102398885297  
0.6293039737825790 0.3579535818938926 0.0638041520379257  
0.7752370826296268 0.8588304079343748 0.1415881636890610  
0.1242660691605595 0.9460593417360307 0.6545497328374482  
0.1206033551007715 0.3590403049619053 0.6532922857496244  
0.7649395032412133 0.4389783439743883 0.1459269706269246  
0.6270884286814783 0.9573391627915221 0.0505625264512372  
0.2876785156209765 0.8640812737399832 0.5533689497615134  
0.3304374583612700 0.4780755932573263 0.3713600901409063  
0.5631752978415767 0.3218040394070188 0.9020810696210315  
0.8365299670451639 0.8298218282795220 0.3106843514880044  
0.0764551291028986 0.9723329331751930 0.8363294826947618  
0.0620746871220293 0.3303635682757344 0.8260506055047953  
0.8345455084084439 0.4678567837177266 0.3058234405969165  
0.5709178112999458 0.9804130587759576 0.8723830034644838  
0.3383436928296560 0.8289179228645496 0.3756957806247547  
0.2712305573493142 0.3584330318289338 0.3881166973165256  
0.6292819750707852 0.4394715581109694 0.9038717779820152  
0.7605558623180299 0.9398986161164781 0.3020402777125430  
0.1326544262316027 0.8531102173925397 0.8021024822387393  
0.1332631951750637 0.4435168707230996 0.8092220871968711  
0.7609418767599878 0.3564053683964589 0.3070143667179326  
0.6158720242901990 0.857735422480389 0.9146018750730002  
0.2689284453768633 0.9418274148601975 0.3932413481769707  
0.4131072712273374 0.5435344565396310 0.2606275665435060  
0.4993884182790451 0.2501290790548260 0.7679193241503887  
0.9001044308068222 0.7597823563274417 0.4442663529308423  
0.9915770358429405 0.0410144554474966 0.9438157897602762  
0.9908786846520808 0.2571573826070898 0.9485709821701773  
0.8892387847654855 0.5415310654600578 0.4433377590543603  
0.4752065149261030 0.0319008325602639 0.7617850498301761

0.4120533982930639 0.7525008320517813 0.2569206429813150  
0.7030313912306004 0.2363085377317740 0.3043166106256316  
0.1888379883134720 0.5657905433620823 0.7777884914389557  
0.1990413926767920 0.0547257227415136 0.3828754831164145  
0.7064850115163739 0.7620732874307059 0.9024008173833654  
0.6943639399826769 0.5562085013245522 0.8940909009776228  
0.2044594508034763 0.2433149832668950 0.4102938602911873  
0.1965696008417808 0.7340997986407370 0.8022827542256208  
0.6997995439736600 0.0583614260846279 0.3143939865436978  
0.5907712692070880 0.2459218385055876 0.4037538493513814  
0.3036263444501346 0.5582181951817249 0.9055287128951999  
0.0810338431214561 0.0616804928776615 0.3038851632320088  
0.8171837991304799 0.7374340447565237 0.8064370462705909  
0.8115155215455425 0.5601013047596310 0.8107218650564143  
0.0921871275809915 0.2486725863153895 0.3105558744985467  
0.3108801645013566 0.7332032451474841 0.8972335205980094  
0.5863564064758766 0.0567239754709305 0.4101177019950894  
0.6072124111129776 0.1485700721961505 0.2664744894600516  
0.2931404105905153 0.6563794798059968 0.7319411623558917  
0.1141051254946296 0.1493129192640250 0.4456238966477962  
0.7788848059276962 0.6524115235126682 0.9498854551176155  
0.5233367653889326 0.2616179169938190 0.5719770902489619  
0.3718460470865925 0.5254062735678894 0.0735164097752708  
0.0156626441285465 0.0258070341604122 0.1379498838397936  
0.8817739883949338 0.7719975604636479 0.6397624719686422  
0.8732361282753591 0.5313616989848664 0.6395113320398795  
0.0233511491806025 0.2673337244662907 0.1418267329886246  
0.3734928281773017 0.7680404940438910 0.0667485050316720  
0.5138134834417563 0.0231133147284950 0.5707673971359273  
0.4584570397385044 0.2368888265447093 0.400882022373993  
0.4359972474805588 0.5622487205523684 0.9133716836203446  
0.9497088338791442 0.0553047952985169 0.3036242911406686  
0.9488957648321138 0.7434283802785535 0.8056283531196837  
0.9432565859692580 0.5612890927305636 0.8018047338213616  
0.9609646523288549 0.2351135780499176 0.3108210058615921  
0.4407326312321131 0.7601628854171529 0.8952537942687678  
0.4545083997705431 0.0652374004068726 0.4044527579019276  
0.4991177198523493 0.1422545316815673 0.6548159698921362  
0.4049620380378523 0.6475452501478133 0.1384910580673387  
0.9995714279552799 0.1480318985557695 0.0610739223097165  
0.8859264075577783 0.6515613878697870 0.5557544717702040  
0.4022828635784649 0.2329151497358235 0.6334723859067471  
0.4997793004169444 0.5547433050702920 0.1125206512840279  
0.8963327741727666 0.0646380861233435 0.0772322744772336  
0.9965956022790837 0.7252891054885640 0.5704380367425005  
0.9899082869436238 0.5705430261739313 0.5631627225871244  
0.9001864086068867 0.2347879102783088 0.090479888264779  
0.5006505588057771 0.7392026404895018 0.1099060481767344  
0.3928577658802629 0.0666429807676748 0.6153893164746332  
0.2944362223099938 0.1565521676303770 0.6122782686847407  
0.5958963211984716 0.6471456323606115 0.1362621774305477  
0.7960169177834454 0.1524282324584453 0.0739726155313027  
0.1014970370602783 0.6433396619001656 0.5748943571439045  
0.2950880231447444 0.2814348542036293 0.5454296318891213  
0.6214552735178301 0.5269578937732935 0.0556683896880333  
0.7839377432116371 0.0332368953319203 0.1648746388787534  
0.1062870313102633 0.7639337998322285 0.6626707153388228  
0.0911493676790794 0.5211177400128923 0.6619319555705372  
0.7829261726457071 0.2742026420434256 0.1546811086159533  
0.261817368286795 0.7674893400512097 0.0610709008841409  
0.2768611389039080 0.0325882255954029 0.5406324796067736  
0.3299219829186940 0.2404226459169304 0.3595348451995059  
0.5657375877090262 0.5560896677570832 0.8777037569535805  
0.8246304929172190 0.0510586438353304 0.3570730628052082  
0.0740824065483805 0.7390353582876378 0.8569365928391853  
0.0691033964105906 0.5553917052913121 0.8552556009327209  
0.8308282655035524 0.2436459343284396 0.3372418479509193  
0.5806940369993160 0.7289548202053011 0.8810403083629670  
0.3272673528497919 0.0596077747674629 0.3572911836394841  
0.4055637078270607 0.1498547644085156 0.2701468958485987  
0.4905224522751931 0.6436272014657194 0.7803330147208078  
0.9005017380997711 0.1486058971512480 0.4298936770583551  
0.9907513440374311 0.6493996646909468 0.9345558704864511  
0.4181101301285287 0.5923811321744443 0.5763684650440838  
0.3991170132644713 0.7108263047542256 0.6393917961038861  
0.4863233986917909 0.6470960688095024 0.3353937367687199  
0.5180468808937752 0.6997257477300493 0.5003513221386059  
0.2579558929171402 0.6115679297287044 0.5387494133450449  
0.5863525311573010 0.6328330289459240 0.6348200036677665  
0.2576230034420740 0.6132737782159356 0.3424299289105110  
0.3451740184526262 0.6899404861049733 0.4647097989869883  
0.6237999035008952 0.4710727104620429 0.3061193720596942  
0.2697765116197997 0.3268637146495840 0.8003213804064904  
0.1311048045149232 0.8245009524869659 0.4115012918632811  
0.7769326063881932 0.9712727267873621 0.9039217671650619  
0.7723916028714277 0.3281988516004135 0.9032715211762027  
0.1253605742147040 0.4680689048854564 0.4052994298924862  
0.2814672769786711 0.9812512832202922 0.7945331844517580  
0.6268078002982599 0.8270656011042742 0.2918144034444572  
0.5230399552182937 0.4344080182443527 0.4612139659807842  
0.3724106520484748 0.3646172062252216 0.9512920366723612  
0.0296116635912474 0.8638557296965808 0.2570063941015238

0.8801934345891015 0.9342798227294924 0.7524871308835641  
0.8724046797054917 0.3662048263193687 0.7515959978558252  
0.0221930182782984 0.4352529931091162 0.2548101632645069  
0.3723753738728685 0.9348562260435209 0.9549810200033183  
0.5277198361567315 0.8690838743664943 0.4465605841225239  
0.4747138106238195 0.4430872392837163 0.6790249587729328  
0.4276621084319118 0.3502496529539533 0.1677114351633791  
0.9775908148980723 0.8502656061559667 0.0417358160343229  
0.9278697873818345 0.9484885911265423 0.5348689605998970  
0.9234853587167181 0.3505411476137379 0.5335257216136421  
0.9661343192111476 0.4497857798229263 0.0391038316507741  
0.4289892272992182 0.9497074812179269 0.1665278258976953  
0.4856125465753818 0.8439013351872895 0.6672341323488885  
0.3222182643278583 0.4468872966407035 0.6570386079776538  
0.5813167119202608 0.3483259324651356 0.1607684163111728  
0.8262429841605053 0.8503778116751372 0.0479755176413672  
0.0827519449810602 0.9494089092800183 0.5500963444457111  
0.0788278495661892 0.3477047890947889 0.5508556854416560  
0.8127462173025733 0.4510562901252097 0.0491293348467802  
0.5818901113568399 0.9531036560005955 0.1516544377155919  
0.3291664994470614 0.8571328653021725 0.6577984779932843  
0.2727115605616216 0.4357523807201326 0.4297736057260667  
0.6283753063021361 0.3609453329462877 0.9411482188160638  
0.7701870185836965 0.8624896116282003 0.2637135145892838  
0.1339945583464296 0.9330924979253700 0.7747683805469103  
0.1263789294359741 0.3650168291153278 0.7755038408010717  
0.7661126799955496 0.4343118468489964 0.2684133164721364  
0.6282007104994435 0.9380623495021436 0.9307341198059113  
0.2766018292591578 0.8642323001276222 0.4324516456645342  
0.4041471961952436 0.4730379600059194 0.3235289185948529  
0.4985045192964294 0.3206724246458530 0.8302119617584510  
0.9033053843315001 0.8280293271202075 0.3773193599260057  
0.0024896788445557 0.9709850270847737 0.8826813963133018  
0.9922647923538834 0.3267855989012230 0.8841090162870769  
0.8983887335177002 0.4728259645989299 0.3783348753812528  
0.4985219763883956 0.9654259180540423 0.8241020968382432  
0.4081805374161783 0.8241569712384219 0.3188955316836469  
0.6233954264803647 0.2265514344024425 0.2950746784854026  
0.1222548031321912 0.0716369640964827 0.4084960304440201  
0.7800072077437429 0.7313333246396784 0.9156009644421638  
0.7718251151814616 0.5738227195109586 0.9158030286201565  
0.1256912583184061 0.2284736386101480 0.4188002169269572  
0.2762518154881344 0.7294902573169021 0.7864071074808954  
0.6211961634307345 0.0712275887163094 0.3008979677369240  
0.5220532520982148 0.2747918447733315 0.4511277641951360  
0.3685403091470680 0.5226236990267070 0.9491483677017282  
0.0172923581535086 0.0212667028570851 0.2603272806604411  
0.8813602233933847 0.7771600354656124 0.7619691714604718  
0.8763782761448036 0.5243131184346099 0.7615075581320435  
0.0229932673451125 0.2768721101389652 0.2637301977258596  
0.3709416814121604 0.7791216372979815 0.9437646376761032  
0.5172535169476663 0.0233359293608869 0.4483016138717747  
0.4803322855582535 0.2217083670449580 0.6571446215830775  
0.4228405798728278 0.5679422373951203 0.1432358518365905  
0.9751404139196905 0.0703076266469737 0.0548795650643049  
0.9170278076830688 0.7269914336238498 0.5526163299339667  
0.9101852702950212 0.5736483127712720 0.5508401664231911  
0.9779895390848672 0.2267778253500477 0.0600954473064881  
0.4233162109945171 0.7270830603226057 0.1396039902457949  
0.4696902846215179 0.0662469448573418 0.6515381542347458  
0.3220723726172258 0.2323081730414056 0.6349765571741829  
0.5775780558257494 0.5675918269921190 0.1392074124990384  
0.8165898520853120 0.0730727403137503 0.0701162488259480  
0.0766154890023958 0.7220831518817935 0.5679759914480974  
0.0696945135154231 0.5670509293053264 0.5666604190219715  
0.8210908106873043 0.2303638356962892 0.0686689953166148  
0.5784645224992163 0.7270280437044856 0.1390025694497461  
0.3134838624885750 0.0774312017519084 0.6271949392130584  
0.2751579668018136 0.2803399469378970 0.4262621934996375  
0.6273364625776504 0.5191759624698782 0.9333108857387160  
0.7679905826470098 0.0207070115071985 0.2836303965399732  
0.1274418448369030 0.7726149934546275 0.7807780812498905  
0.1225728811564801 0.5224670162882751 0.7767760314812573  
0.7698737722052914 0.2775041602224347 0.2760642845677935  
0.6309886656414618 0.7782474025732449 0.9382806007155085  
0.2686557233397754 0.0221181182039371 0.4192348812906163  
0.4030809678578998 0.2268475934409986 0.3126290133032593  
0.4929054768163438 0.5673434763593239 0.8284335920725100  
0.8984182277417013 0.0699070269813953 0.3959168881310477  
0.9994368728995001 0.7271454727109674 0.8982568205889853  
0.9952180291427336 0.5718004589659447 0.8949253726693602  
0.9008836419475399 0.2264320661098135 0.3915298486378305  
0.4010088202410559 0.0732576633500724 0.3132945099040922

Structure TS reaction CH4/2→13 S=10/2

1.0000000000000000  
20.1473052208878016 0.0000000000000000 0.0000000000000000  
0.0000000000000000 19.7681594983396991 0.0000000000000000  
0.0000000000000000 0.0000000000000000 13.2309279702280005

Al C Fe H O Si

2 1 2 14 200 94

Selective dynamics

Direct

0.2735819893175915 0.5731023113026126 0.7867177553993017 F F F  
0.5017863010671633 0.7292796216451123 0.8196620895764539 F F F  
0.138703527769601 0.6419149706918907 0.2501650970585196 T T T  
0.3425720340292430 0.6481498686153793 0.5888337664196144 T T T  
0.4776320269152509 0.6527517069338107 0.6246392624007907 T T T  
0.4596296543193251 0.6093402581803224 0.3386484512436486 T T T  
0.4507607003750084 0.6873562574316308 0.3199902072728553 T T T  
0.5344103119927869 0.7392323280377197 0.5050335687869254 T T T  
0.5113736560034915 0.6748269044154828 0.4335533538716015 T T T  
0.2203738899674369 0.6118579709283850 0.5792891528349452 T T T  
0.2543944955066737 0.6097648271259789 0.4671319428066108 T T T  
0.6065766513641591 0.6209068207851364 0.7068108321640514 T T T  
0.6088330680871697 0.6378570893166726 0.5903343557702285 T T T  
0.3464082409988283 0.7369961442366572 0.4625280168965085 T T T  
0.2902549315705303 0.5904595663619944 0.3318537306192765 T T T  
0.1865483217597472 0.6297963296579515 0.2893379918456397 T T T  
0.1437255321227960 0.6930913486839428 0.2191851504843870 T T T  
0.0988851527821544 0.6399672585731824 0.3064386910310067 T T T  
0.1303727453877077 0.6048051956539718 0.1900113894186893 T T T  
0.7044846731001684 0.4764553434767222 0.3159203838180247 F F F  
0.1902608191566699 0.3213169491295247 0.8128005150185871 F F F  
0.2113011033702676 0.8207099652797893 0.3997457468645962 F F F  
0.6985788331690586 0.9610363899880525 0.8817993800102499 F F F  
0.6915335175396820 0.3240076749204164 0.8941486531281413 F F F  
0.2047812048684960 0.4767046628405538 0.3957920829283381 F F F  
0.2049354218031993 0.9629750018914720 0.8115819506153414 F F F  
0.7080753909481174 0.8179757016023359 0.2992903747797726 F F F  
0.5928775582284160 0.4657128050345563 0.4196427843881736 F F F  
0.3022085569775328 0.3322468129902845 0.9138648128501927 F F F  
0.0992389667821882 0.8321070792802630 0.2973436073287274 F F F  
0.8157302086299580 0.9742193406626782 0.7947097492321618 F F F  
0.8023797418472753 0.3345823225862148 0.7889289722577146 F F F  
0.0943824865417611 0.4627841137734379 0.2906511278436454 F F F  
0.3190659340919524 0.9866183596396496 0.9025047468372804 F F F  
0.5999323281634190 0.8434253603912509 0.4028640411822906 F F F  
0.5946048149944758 0.5369654395964574 0.2507380941986597 F F F  
0.2977769286993563 0.2594115218584605 0.7441207870402522 F F F  
0.1041546943819185 0.7547703939274228 0.4616216619936750 F F F  
0.7886806138569540 0.0420140845670929 0.9633706840438876 F F F  
0.8017042477421441 0.2627803301665992 0.9582530043586388 F F F  
0.0939582094851517 0.5334403436527566 0.4608959517011471 F F F  
0.2877736474457748 0.0543519675453439 0.7367468965321962 F F F  
0.5938533331633806 0.7581569548174727 0.2501268311562654 F F F  
0.6046169295864772 0.4022048955127318 0.2458050109827710 F F F  
0.2886826363018287 0.3936661619445587 0.7361878005749958 F F F  
0.1107763740484629 0.8896251996277655 0.4766981115972939 F F F  
0.8067175525769841 0.9084574825196157 0.9660092394226609 F F F  
0.7912057439711617 0.3978507856699949 0.9628877607592727 F F F  
0.1085240576571849 0.3987863720797407 0.4651847070293087 F F F  
0.3191300919446931 0.9253675919098825 0.7234253072002090 F F F  
0.6106973194732461 0.8902586135274007 0.2160671771999247 F F F  
0.5233723610860039 0.4460953582390061 0.5824751438893045 F F F  
0.3766729545055938 0.3578351816876619 0.0746192928489648 F F F  
0.0299343811444714 0.8584578751499023 0.1333988137641811 F F F  
0.8794996072246803 0.9370345357233774 0.6296860772544122 F F F  
0.8754164025019193 0.3604006399107931 0.6291714810355131 F F F  
0.0166111773966549 0.4425322806328538 0.1330027964726810 F F F  
0.3748771798265054 0.9472417602332683 0.0751263085093754 F F F  
0.5292806993940502 0.8591644925962214 0.5632966365738454 F F F  
0.5154408805155342 0.3556615118668915 0.4308460959315994 F F F  
0.3776187766846775 0.4431267918418555 0.9179184730924348 F F F  
0.0225447053721055 0.9422952437575134 0.2925691325087314 F F F  
0.8793052363014127 0.8565474570382605 0.7923415935595557 F F F  
0.8795996913229587 0.4441492050742895 0.7887056703013187 F F F  
0.0128593940895669 0.3564756579803188 0.2896885662099180 F F F  
0.3499610286802763 0.8591964076093532 0.9262313700812115 F F F  
0.5135122542475372 0.9465090156847253 0.4066695541247398 F F F  
0.4616122695952924 0.4749463959499494 0.4095945624946751 F F F  
0.4319645478829628 0.3216791413478290 0.9009067312329222 F F F  
0.9682552798067263 0.8214535599275905 0.3028238525429146 F F F  
0.9485306194799890 0.9696695422477006 0.7916899736492269 F F F  
0.9332708804671981 0.3230091311244223 0.8006617711324679 F F F  
0.9652341559043975 0.4799097234600822 0.3101210676426476 F F F  
0.4471901398650360 0.9506205110814392 0.9126623265602873 F F F  
0.4705141822625407 0.8214123265303570 0.3944295231134021 F F F  
0.4789112098577277 0.5139419117178079 0.7391710094541608 F F F  
0.4194872231032960 0.2778215688669192 0.2198376338884529 F F F  
0.9855180692607277 0.7749504951336874 0.9932216118056374 F F F  
0.9192835389678109 0.0250343187292614 0.4929213815546447 F F F  
0.9132697598368367 0.2752013256587347 0.4871687853375377 F F F  
0.9736290354753621 0.5239235232599384 0.9889893243395065 F F F  
0.4203521473561054 0.0241039359285793 0.2205941834867815 F F F  
0.5034522972237241 0.7674985745275080 0.6994154435757380 F F F  
0.3987117105529592 0.4267462881037858 0.6378023501847068 F F F  
0.5036083279896033 0.3624782811348410 0.1305182297077536 F F F  
0.9030837452822738 0.8617238304678594 0.0822602465435764 F F F  
0.0055895602733216 0.9376744111578219 0.5718785625327953 F F F  
0.0004761735483214 0.3618870121306514 0.5671013851268043 F F F  
0.8894749978650012 0.4407978206216754 0.0805305448884823 F F F  
0.5035750965288344 0.9405491101095080 0.1265008436407697 F F F  
0.4064443640609099 0.8520420116765592 0.6273339511490690 F F F



0.4981924143069136 0.3834008538005023 0.7521328866826451 F F F  
0.4090804845373270 0.4092405660756953 0.2522194627381324 F F F  
0.9952213008991890 0.9059173279540005 0.9537832551434988 F F F  
0.9104697530725474 0.8950416905098209 0.4468166242847431 F F F  
0.9026505112564607 0.4064348455659825 0.4485521904792478 F F F  
0.9817058372700487 0.3914487641785556 0.9571727204729186 F F F  
0.4107525301086952 0.8908924806097929 0.2456578424498375 F F F  
0.5013006840189718 0.8972183259031183 0.7492806920942243 F F F  
0.3171045053811722 0.5222735801681807 0.7031720071242418 T T T  
0.5907037742329280 0.2729282432863016 0.2024607641055383 F F F  
0.8194174771970424 0.7752221002459549 0.9984933406170171 F F F  
0.0948961281813325 0.0226403928442380 0.4951010004108198 F F F  
0.0898231640159608 0.2703760707781484 0.5085328073862243 F F F  
0.8004320012972315 0.5278876163572548 0.0076062587468400 F F F  
0.5897848307058027 0.0229389872492689 0.2132442827955288 F F F  
0.3028727071824449 0.7919589751588774 0.7196799679789265 F F F  
0.2797164229254605 0.4393852953083197 0.5526971005632859 F F F  
0.6280025126841764 0.3602415633064382 0.0616618856203175 F F F  
0.7762935721653008 0.8594301219953522 0.1411771221445335 F F F  
0.1264311606372388 0.9467133335158096 0.6527703651999275 F F F  
0.1203165149739220 0.3582612287553317 0.6524223774884916 F F F  
0.7643267162619054 0.4384811992021866 0.1463238496220143 F F F  
0.6242145069715193 0.9581677584957049 0.0469916618131947 F F F  
0.2831360396791993 0.8624108742625651 0.5564405284068883 F F F  
0.3313497235936538 0.4792246973375640 0.3775696925683079 F F F  
0.5623568234551755 0.3227109079174681 0.9000440258520683 F F F  
0.8375561252856798 0.8315799880293469 0.3107682074533926 F F F  
0.0768995711266385 0.9730029468968127 0.8335304768369625 F F F  
0.0622908883720541 0.3320144555468119 0.8262279561719765 F F F  
0.8348475330793192 0.4689887931027314 0.3049991368281582 F F F  
0.5711628653363547 0.9789040915622422 0.8657972163793630 F F F  
0.3401955575134963 0.8270396920671104 0.3842166378324094 F F F  
0.2705254282134817 0.3605488378502457 0.3894477027338823 F F F  
0.6264150380797915 0.4413812753894106 0.9011574758211580 F F F  
0.7602054268288683 0.9406679590548777 0.3010525988720971 F F F  
0.1318359662083708 0.8532944416794237 0.7999525691803271 F F F  
0.1354469309354869 0.4434536731930336 0.8074093719524242 F F F  
0.7623873673090387 0.3565439251024145 0.3078238381093286 F F F  
0.6160633154700861 0.8572409115519761 0.9127299343437301 F F F  
0.2711767683527171 0.9408558423058011 0.3947206590503995 F F F  
0.4106077103650208 0.5451701684834944 0.26296695583024301 F F F  
0.4983342347747168 0.2495387480134639 0.7678436912870623 F F F  
0.9003015685505318 0.7595306106133890 0.4430951758033572 F F F  
0.9931966700435808 0.0416779768128421 0.9427407571020652 F F F  
0.9922024014094077 0.2567450480788835 0.9470832880807691 F F F  
0.8899193955314786 0.5418741503340030 0.4435322547330287 F F F  
0.4734825574599313 0.0299028978721623 0.7589051274298413 F F F  
0.4089455418831136 0.7545496238835412 0.2560263648376875 F F F  
0.7022393178985240 0.2374147237549309 0.3026860709595098 F F F  
0.1883548505243269 0.5670969549719089 0.7795125255099151 F F F  
0.2000865654493111 0.0530776481317830 0.3790218141537309 F F F  
0.7051164359457829 0.7601220620201374 0.8999890301704738 F F F  
0.6929966421664631 0.5576230571871221 0.8948243532910780 F F F  
0.2039249666129948 0.2453367717225703 0.4088810757702461 F F F  
0.1970641848621426 0.7352520349853506 0.8000263916084265 F F F  
0.7005850921620720 0.0599509836267416 0.3113061014526011 F F F  
0.5897841547630733 0.2468645163659033 0.4007392405157262 F F F  
0.3028721557987026 0.5571783848934828 0.9081498322537414 F F F  
0.0818374627671119 0.061463600077695 0.3018185908928501 F F F  
0.8166443192543582 0.7382977931779351 0.8047574767719965 F F F  
0.8098497377015974 0.5579337481017461 0.8109999818416682 F F F  
0.0911827782818762 0.2480466422924437 0.3096066914513074 F F F  
0.3096353376711392 0.7336247681233701 0.9000511338091286 F F F  
0.5878120035148200 0.0571932781919173 0.4086421345528066 F F F  
0.6068862528472181 0.1490798203039247 0.2643096381307330 F F F  
0.2941088924386137 0.6561851073498550 0.7350625689638260 T T T  
0.1162899306111740 0.1488845061538981 0.4433132888029547 F F F  
0.7796186987891858 0.6524719127294105 0.9481993833798938 F F F  
0.5247218953692681 0.2605458900871938 0.5718627867885644 F F F  
0.3715107650335909 0.5251138988269162 0.0755879806936690 F F F  
0.0155405702337816 0.0256686654795431 0.1368663395223777 F F F  
0.8822189905134223 0.7725928336517498 0.6388187250597568 F F F  
0.8716578273581206 0.5317811936312253 0.6394789248082660 F F F  
0.0228680542389057 0.2679438835702257 0.1407506763334325 F F F  
0.3740395103800154 0.7694948761899809 0.0663543927679200 F F F  
0.5141990337789721 0.0237659942824635 0.5690375566487447 F F F  
0.4576250021577337 0.2371141450620442 0.4027477145896796 F F F  
0.4353562368656512 0.5626375181893266 0.9155192879401284 F F F  
0.9505111710946252 0.0558289168556811 0.3030845447232480 F F F  
0.9484299339001154 0.7424879029917051 0.8049836258995811 F F F  
0.9415864143862223 0.5623961799104862 0.8020651935316607 F F F  
0.9597792473491182 0.2349093310961834 0.3085464578361581 F F F  
0.4393789940657555 0.7616497334617947 0.8927806674688910 F F F  
0.4561873647456878 0.0669656082386325 0.4024010246421312 F F F  
0.4982464195989138 0.1418602304069481 0.6553361560838411 F F F  
0.4026081436178117 0.6483074288828519 0.1392241399350240 F F F  
0.9996449776296643 0.1483000779098091 0.0613222859386653 F F F  
0.8856586033410352 0.6518611500694078 0.5557150375088966 F F F  
0.4026575736506430 0.2337945177289384 0.6303695256354231 F F F  
0.4984526687537851 0.5561776361024400 0.1159425206022178 F F F  
0.8966047537902213 0.0646767915474911 0.0741834861654880 F F F  
0.9967110539482320 0.7252365271155909 0.5693789160247391 F F F

0.9891959416470968 0.5704507323018575 0.5670429351158717 F F F  
0.9000214668924116 0.2355594230171221 0.0868403617885889 F F F  
0.4999065790771127 0.7383485452858878 0.1119444826665585 F F F  
0.3923872486086140 0.0666369447372333 0.6124908422316508 F F F  
0.2946449598788021 0.1574073448043194 0.6123090941628320 F F F  
0.5959500062919574 0.6469129565112937 0.1382668620589058 F F F  
0.7962395674580520 0.1526759181387973 0.0729831599063289 F F F  
0.1011069264812647 0.6428257614256907 0.5725918177966278 F F F  
0.2941060935609698 0.2823352327817261 0.5457462037013272 F F F  
0.6188046645913374 0.5272687037455697 0.0545124954203615 F F F  
0.7848762184535971 0.0330763560895733 0.1630476733315476 F F F  
0.1069263336112058 0.7636226580334124 0.6603057358835045 F F F  
0.0925370549733202 0.5210493794297619 0.6609661797588302 F F F  
0.7835926549395182 0.2743781583657139 0.1548712964878618 F F F  
0.6243720690387349 0.7660586248601149 0.0577764303020842 F F F  
0.2758584032640812 0.0337332282978409 0.5393994089527610 F F F  
0.3294253968543117 0.2427841531634272 0.3594563364367218 F F F  
0.5647793290083385 0.5593629650287255 0.8755966522397927 F F F  
0.8253046749693240 0.0512753223310867 0.3554832814245756 F F F  
0.0741985382704229 0.7384608591691020 0.8538972297483980 F F F  
0.0678322103578921 0.5533474756452392 0.8537968355595140 F F F  
0.8298409784251675 0.2424971223611436 0.3381163375304368 F F F  
0.5788390783054638 0.7295839480682105 0.8761623552539177 F F F  
0.3287239660978756 0.0585394759618509 0.3570659474379099 F F F  
0.4042992462670654 0.1514634578705980 0.2705098975742999 F F F  
0.4857942746965307 0.6438102898805980 0.7785203488918953 F F F  
0.9010294400700829 0.1485017187648410 0.4299843433348158 F F F  
0.9917743799616545 0.6491378800791878 0.9339929931023718 F F F  
0.4154526492080117 0.5915213066887920 0.5724981295783306 T T T  
0.3979651031018493 0.7096222150089450 0.6259172634595825 T T T  
0.4837009100606267 0.6526286801312132 0.3391707068389457 T T T  
0.5293322323629267 0.6902120523019701 0.5045101338359951 T T T  
0.2603687986959725 0.5969243751586834 0.5436316296985153 T T T  
0.5830833303079520 0.6152167010873365 0.6428176783322587 T T T  
0.2640256420034847 0.6291061454877815 0.3576173110012621 T T T  
0.3142004525399095 0.7025010518404110 0.4827812957139121 T T T  
0.6243836056501593 0.4704526598308050 0.3068092343224791 F F F  
0.2701288353147220 0.3270473001801761 0.8008554997444506 F F F  
0.1312378068569231 0.8243273060363734 0.4099144551222480 F F F  
0.7768516601267947 0.9715405507629882 0.9026447791071561 F F F  
0.7715484469738669 0.3293459520353963 0.9023533583010632 F F F  
0.1251638359963039 0.4678306006676110 0.4044350851271901 F F F  
0.2820192638913213 0.9815261382230389 0.7933514783402060 F F F  
0.6284313764327791 0.8275466103188620 0.2901279942438748 F F F  
0.5232525261177798 0.4348489414987142 0.4618071069374849 F F F  
0.3721196430299685 0.3643865282602121 0.9524488710183974 F F F  
0.0298729154586894 0.8639330423262095 0.2555725724244340 F F F  
0.8806434645107046 0.9344020919850706 0.7520347883694498 F F F  
0.8728926387671478 0.3658994067285235 0.7509801405987062 F F F  
0.0220086226349778 0.4349693451656051 0.2544281358251652 F F F  
0.3729143976238021 0.9356440887746018 0.9537241503553489 F F F  
0.5282910918370547 0.8696677006078772 0.4427865038828287 F F F  
0.4730227044403321 0.4432770195486739 0.6782996807492836 F F F  
0.4273454804404722 0.3517850118495005 0.1690682348443389 F F F  
0.9783522625984844 0.8504143263741213 0.0397448115875534 F F F  
0.9292112565085802 0.9486134341356518 0.5348605443959542 F F F  
0.9236758320288700 0.3507513697359386 0.5322585759346978 F F F  
0.9652710338085200 0.4496776536999505 0.0389805606373486 F F F  
0.4279823413725197 0.9512067721118811 0.1666984884367793 F F F  
0.4836280085669955 0.8427622888379958 0.6623378027626572 F F F  
0.3210634893198829 0.4477958777747872 0.6578827205022577 F F F  
0.5811679526792020 0.3493220278030122 0.1596824739035796 F F F  
0.8264194879135900 0.8506621235080871 0.0465732347262247 F F F  
0.0840665287488420 0.9496730555457020 0.5489868507554831 F F F  
0.0791429258870409 0.3473090236084531 0.5493207563552076 F F F  
0.8119096751077990 0.4514050878649130 0.0495047340795409 F F F  
0.5818512035521621 0.9529378245936613 0.1507017976695053 F F F  
0.3285129338026849 0.8569458115800188 0.6573930018178160 F F F  
0.2716501192060790 0.4376950027330082 0.4320087116012488 F F F  
0.6269715543799919 0.3628745549321621 0.9389260648665427 F F F  
0.7710667108093645 0.8632896927436491 0.2632225408443460 F F F  
0.1346969466297594 0.9333099616635110 0.7731780524561032 F F F  
0.1269585353069402 0.3649839182637251 0.7744025562954633 F F F  
0.7665664829643788 0.4344406599813126 0.2688671154095061 F F F  
0.6276452302598230 0.9377123624218910 0.9277608790370309 F F F  
0.2762605185539471 0.8632416290064597 0.4346230784242167 F F F  
0.4036155285824918 0.4742013146116619 0.3253900742427049 F F F  
0.4970861509725353 0.3203265404593125 0.8295296297281283 F F F  
0.9044077656936835 0.8280673628745348 0.3768770829531221 F F F  
0.0033209633921985 0.9715896757351388 0.8814083541987543 F F F  
0.9924186429639192 0.3268384265953443 0.8836727068411747 F F F  
0.8985257252837471 0.4732792861586503 0.3780949559187903 F F F  
0.4980539911103037 0.9635958918745331 0.8204095708856940 F F F  
0.4069987983066383 0.8261229970641750 0.3182843264565420 F F F  
0.6227299526018939 0.2272792424887768 0.2924223431518698 F F F  
0.1236632434717961 0.0711942993571668 0.4058959921636571 F F F  
0.7793551109965122 0.7313536292840226 0.9137382294579339 F F F  
0.7708719685941716 0.5737581731531947 0.9159775674415656 F F F  
0.1255786115716546 0.2285210576866490 0.4174443160144889 F F F  
0.2768491855828117 0.7295021428350026 0.7878929299577209 F F F  
0.6217636641737982 0.0718809915271450 0.2986845756439536 F F F  
0.5218028245098907 0.2749829010130682 0.4512784746866032 F F F

0.3682182314810092 0.5222349343180426 0.9513423703379047 F F F  
0.0176739259330532 0.0212909299567343 0.2592085404990669 F F F  
0.8814930319203924 0.7773161893589204 0.7610964385635413 F F F  
0.8755450265836586 0.5240618925630116 0.7613759469123522 F F F  
0.0222099933553181 0.2767595288604028 0.2627494007461380 F F F  
0.3701422078758938 0.7801910236918204 0.9437183022537639 F F F  
0.5183751504402352 0.0244415784615626 0.4466468126365655 F F F  
0.4802799088089102 0.2215433542808043 0.6564051488187346 F F F  
0.4213100043034146 0.5688967850415949 0.1455613406487046 F F F  
0.9755969915339406 0.0705325796668248 0.0536417218205116 F F F  
0.9171222409542139 0.7271194763302447 0.5518201615426506 F F F  
0.9097178002843975 0.5738412213381281 0.5516239739570210 F F F  
0.9781073412149084 0.2270373831070955 0.0586780434024732 F F F  
0.4221977432242454 0.7275098338168249 0.1401329564368510 F F F  
0.4690169172983403 0.0658971348267627 0.6497073834955245 F F F  
0.3224273519839898 0.2332191175062732 0.6343342749683742 F F F  
0.5766577949508758 0.5675904997035488 0.1403656464664280 F F F  
0.8168754719353259 0.0733507797033042 0.0681522236364813 F F F  
0.0767256126753608 0.7217580472454799 0.5660618402073396 F F F  
0.0690115289174500 0.5665223222060666 0.5664130889485079 F F F  
0.8207003604610961 0.2308406965042522 0.0674902375765427 F F F  
0.5780831073499826 0.7267019726895114 0.1387504206623618 F F F  
0.3131330639636900 0.0780726857272995 0.6258283966019604 F F F  
0.2744747790352449 0.2822886903425967 0.4263900108488698 F F F  
0.6253513173829930 0.5208970213785307 0.9321194027052044 F F F  
0.7685332279264756 0.0213330889550747 0.2818581082773264 F F F  
0.1275183532255539 0.7727683955171329 0.7784729316937629 F F F  
0.1229479091072179 0.5223538196076376 0.7763442976673787 F F F  
0.7699255762930335 0.2776068318005613 0.2760636963909278 F F F  
0.6297021855817491 0.7773505967485477 0.9352241778326587 F F F  
0.2695397021843391 0.0214913568496158 0.4181773122744872 F F F  
0.4026448406334779 0.2282769751575415 0.3136714881843901 F F F  
0.4908103837865809 0.5679522452026049 0.8284451352800275 F F F  
0.8989713279767173 0.0699468158824459 0.3952068397480346 F F F  
0.9998767320279498 0.7267499665559782 0.8966670003182955 F F F  
0.9945635818007545 0.5714488021924211 0.8942426432075905 F F F  
0.9006293938859784 0.2261863972774023 0.3908765102117755 F F F  
0.4017858684551712 0.0745399969786362 0.3124057373517104 F F F

Structure 30 S=8/2

1.0000000000000000  
20.1473052208877697 0.0000000000000000 0.0000000000000000  
0.0000000000000000 19.7681594983396742 0.0000000000000000  
0.0000000000000000 0.0000000000000000 13.2309279702280254

Al C Fe H O Si

2 1 2 10 198 94

Direct

0.2735432801689818 0.5730368438422349 0.7862127251698394  
0.4920209368715007 0.7352475569626920 0.8219466967114498  
0.5603656262451063 0.6356698435692087 0.4261372495571389  
0.3200807136351308 0.6234197464147883 0.5811349814797742  
0.5015074269180643 0.6757219354035829 0.6241817498763429  
0.4275170141473201 0.5865181146683284 0.6262097381797256  
0.2042864579471090 0.6818250789951459 0.5533064139446562  
0.2459648022744612 0.6665570632958928 0.4537350240956736  
0.6040532932607806 0.7305421716216107 0.7247203548122694  
0.6337640860068642 0.6768401100492916 0.6469013127763081  
0.2402288668056956 0.5736272094603607 0.3576354678474596  
0.5525308354950529 0.5630640493592394 0.5327878843490965  
0.5763996660214334 0.6886257688580012 0.4281325734228541  
0.5099810362210604 0.6321420220190046 0.3944493379594738  
0.5951862333095830 0.6063817414283289 0.3801607567708878  
0.702232252812700 0.4683559251585376 0.3123123017593656  
0.1920460270296039 0.3341730068457512 0.8142823226809178  
0.2036749795484918 0.8266483413144623 0.3950357121339093  
0.6915590843275080 0.9802740912652750 0.8942579387073031  
0.6939792430645808 0.3220457769395578 0.8889552368581221  
0.2044091559702387 0.4784444145334537 0.3882400970696608  
0.1943138987389639 0.9718152933307433 0.8111006685938671  
0.7029174307471162 0.8230721859196969 0.3053432467137031  
0.5878659305080283 0.4654058893407618 0.4092545750878075  
0.3057029949533177 0.3392486854040213 0.9089919711447922  
0.0928707625584324 0.8352733628908893 0.2897645801406975  
0.8039993121731411 0.9691543689566765 0.7895072629342826  
0.8053993771339654 0.3329959624894305 0.7884034859917458  
0.0912489925405596 0.4679284009531584 0.2901690432614383  
0.3075915802924762 0.9809972608250666 0.9138559752578860  
0.5926702827591622 0.8395015860001113 0.4072479953687064  
0.5999830992292362 0.5312335983608678 0.2355818695632320  
0.2966569320600938 0.2729042443736223 0.7351004308963971  
0.0944328176187945 0.7612628118010811 0.4560713035969051  
0.7994371330214564 0.0421974600004937 0.9575018212173729  
0.8023079785433260 0.2590430727862473 0.9559318428291720  
0.0981170779803733 0.5442100380511398 0.4548159143811144  
0.2900846272974788 0.0542471774934941 0.7503825112659223  
0.5932270159777043 0.7596782864738216 0.2460519081779231  
0.6007028165007003 0.3949071432055170 0.2425576484425819  
0.290117722788078 0.4084527149682949 0.7396067993622362  
0.1026989850887203 0.8953046857294031 0.4688152103968182  
0.7928410916430149 0.9077302521845553 0.9654175458711108  
0.7932518046587136 0.3932490634363248 0.9672443043818558  
0.1033188645339348 0.4102210592720725 0.4709341844650061

0.3066312340752337 0.9216901407931496 0.7341931366234528  
0.6048168180982771 0.8934392568455298 0.2234693839038820  
0.5215032680062850 0.4593072935994192 0.5763218916523916  
0.3819022269881432 0.3574893084950764 0.0676786264650062  
0.0225040622419332 0.8607333111054496 0.1263204165397134  
0.8711169955585106 0.9372270938385805 0.6248561636690084  
0.8752984534904943 0.3621720361159022 0.6258733203469166  
0.0230969532502868 0.4376126614232782 0.1258799070334027  
0.3667330007147542 0.9446715195187565 0.0840631235480718  
0.5200284199413550 0.8588573853818389 0.5703656887613304  
0.5115408445936457 0.3557412536616618 0.4454004714672694  
0.3900379245461403 0.4436093763672777 0.9116313800562932  
0.0116463426599505 0.9412986715310521 0.2885644885122863  
0.8775014202112423 0.8572040539904993 0.7878398226893656  
0.8816416746586687 0.4424012405294290 0.7892677622960995  
0.0176450996742245 0.3565368431362224 0.2886439783148668  
0.3469541707898160 0.8559393571774795 0.9339673061107537  
0.5100812321213478 0.9452524282152515 0.4144683383142962  
0.4563542515163003 0.4745703934728911 0.4067698622909849  
0.4348676698368328 0.3203509101417120 0.8906635910600648  
0.9618688108973807 0.8193820356827866 0.2947689761660274  
0.9366161902909960 0.9752603580989017 0.7893773891766659  
0.9363451153257103 0.3216153663384261 0.7930277597387099  
0.9596672401137443 0.4758531889399308 0.2917516967328092  
0.4385290059794657 0.9531146383912584 0.9205995610470263  
0.4635108907113704 0.8200431472424193 0.3991232979305586  
0.4691259285094399 0.5257005003630577 0.7262985379966667  
0.4216782259725453 0.2736511626513062 0.2098790818050816  
0.9809790564711288 0.7782051165812666 0.9843579578604706  
0.9107423403320011 0.0209437857134802 0.4827504242800303  
0.9104402467370386 0.2756443190005387 0.4847485150064945  
0.9860662917844044 0.5221847434833370 0.9829951699824026  
0.4083876321396878 0.0223435342464559 0.2305989046066511  
0.4734452561486184 0.7663814158053344 0.6983972712605855  
0.3953971574643926 0.4372863019525608 0.6267480769495378  
0.5096085909367973 0.3491456377654719 0.1136474046351379  
0.8962462274493274 0.8643821086347101 0.0724083054222887  
0.9974283871460741 0.9372421935985323 0.5707588259639691  
0.0008652620142337 0.3578023759118267 0.5677419633190554  
0.8970867089404059 0.4398961485323638 0.0700429576810414  
0.4940150248804596 0.9395970218319155 0.1396762447579211  
0.3919048507450640 0.8592409636207622 0.6164460945112195  
0.4944745202730809 0.3929176502624885 0.7450139493986305  
0.4280105750350866 0.4070226238101926 0.2415056615323196  
0.9890776460734936 0.9093018814901387 0.9464388816114078  
0.9050316684998236 0.8894151304389185 0.4452568521354147  
0.9078057060054490 0.4068053411851336 0.4450197514059298  
0.9889589277278660 0.3899406921830380 0.9470204263089286  
0.3995148062248083 0.8891865805311319 0.2571097303968624  
0.4820390723081020 0.8915163578787000 0.7561905313233306  
0.3066752060403676 0.5334592667703930 0.6752569504123946  
0.6030396841921034 0.2668739030624920 0.1871255693788853  
0.8122763099192519 0.7759404383042403 0.9942127276749785  
0.0839942437218669 0.0259648047431111 0.4970646317715824  
0.0939540634146459 0.2762660435528195 0.4942019084378920  
0.8068060399990202 0.5251418732213664 -0.0012054794039873  
0.5815120361477362 0.0255362298887319 0.2166789685027326  
0.3032890050484809 0.7871356936129544 0.7176225608205145  
0.2741730671083313 0.4333648751297922 0.5475002274917454  
0.6343794107912941 0.3633343361770995 0.0562108420093906  
0.7728319141657513 0.8548648523837953 0.1436787671653198  
0.1191033226870097 0.9473908635473073 0.6495779605532510  
0.1216757966889751 0.3542599683583012 0.6488473439516415  
0.7754102204943655 0.4432389253110067 0.1490518251362253  
0.6120074531263878 0.9587054086874475 0.0516207025192443  
0.2640960062022515 0.8646974906824485 0.5658728728777751  
0.3315464084586552 0.4376051249316270 0.3654010300169408  
0.5646350172799042 0.3381434494883091 0.8915669338657157  
0.8318265607656596 0.8192021031966907 0.3149466077227239  
0.0657278268237595 0.9812299402371510 0.8248898759654700  
0.0650243204611272 0.3179390899654287 0.8223029717598060  
0.8304166197820388 0.4783102857702101 0.3231565479336792  
0.5649251904856519 0.9624072055581985 0.8659007328923226  
0.3330825143267835 0.8300086724409463 0.4047431444307881  
0.2385885395801323 0.3512119005279985 0.4001425069462018  
0.6442024129346314 0.4457693680924592 0.8992097566365622  
0.7727591695031194 0.9381875253529652 0.3017595920362728  
0.1217333062968074 0.8604660651410879 0.8037696622453179  
0.1116726846669947 0.4419337464798947 0.8010643492865234  
0.7744212163850553 0.3572259840703993 0.3054720982384893  
0.6429158662393343 0.8592273188580388 0.9235125337573151  
0.2650635509981065 0.9456450138683921 0.4059299457324148  
0.3896453854134359 0.5357033038894816 0.2641487041230290  
0.5096980469414655 0.2592112446548405 0.7572588436927323  
0.9056132741023974 0.7542290483423201 0.4435037163557408  
0.9821496379818447 0.0446010474137413 0.9423213087328332  
0.9857192387278958 0.2547196741875518 0.9462111423910570  
0.9096106103002694 0.5424611782144307 0.4450109764423849  
0.4727549772863980 0.0265375447485683 0.7644351663734851  
0.3909743823138807 0.7535434071117358 0.2696109754180892  
0.7047557298673361 0.2428157090296713 0.3129933211106594  
0.1934900757381976 0.5485492375850828 0.8125758135050921

0.1958836128773758 0.0595551594781249 0.3964374669362715  
0.6949957240630540 0.7367328396246241 0.9167181827469412  
0.6944237613431606 0.5688036261538097 0.9106116029238353  
0.2053361498523522 0.2242615753244465 0.4105412922352528  
0.1916229245250450 0.7463696530269807 0.8087143548539163  
0.6973905129046549 0.0468156095649041 0.3128250309242943  
0.5837291583449323 0.2524423966500781 0.3849296764223815  
0.3246646416282656 0.5603363375923808 0.8880644635731088  
0.0852364557417307 0.0526057025538289 0.2983005928460762  
0.8001682015088761 0.7483580038623944 0.7982829841392793  
0.8023643166079411 0.5501760359405697 0.8004952500705207  
0.0971994859948055 0.2488336201914686 0.2985029393390278  
0.3064426243659059 0.7319813916319785 0.9006840531592356  
0.5857714956071470 0.0561710053584411 0.4122348607087289  
0.6154484283128295 0.1476099925042591 0.2699783189447362  
0.2793447112426012 0.6566288774639946 0.7376112360564347  
0.0998824100575885 0.1495356579254770 0.4359954511695542  
0.7953104313543562 0.6506155477183380 0.9367231185117584  
0.5266561265416048 0.2477382075822125 0.5616477711080350  
0.3730600520498932 0.5248068085373297 0.0677697697084786  
0.0160546406977854 0.0252976921973183 0.1334888743600537  
0.8742023188682752 0.7705610788923231 0.6360188791242859  
0.8776835942176945 0.5280135512755852 0.6375580486922120  
0.0203235126025740 0.2695210194662775 0.1379443766546924  
0.3633925961678225 0.7652287625620259 0.0765399418079442  
0.5133434773791202 0.0266009051556002 0.5737918132691743  
0.4506252605777654 0.2415357433739365 0.3998844327894009  
0.4552045393915978 0.5582519142297802 0.9216190056921889  
0.9539144728446612 0.0610481205690072 0.3019645712441874  
0.9318563784385244 0.7358948743021947 0.8086088180495693  
0.9326239904252716 0.5651827088153967 0.8109121353852479  
0.9662690230810819 0.2342901323840487 0.3131400834424328  
0.4371400608817199 0.7578611262789029 0.9132579647116600  
0.4547586167659280 0.0673542995825241 0.4055605326590072  
0.4943020398598850 0.1414675244297032 0.6727904678989047  
0.3864358618349965 0.6452176925337807 0.1535756881543516  
0.9976345752443554 0.1485379389478338 0.0637921933511810  
0.8947183341730257 0.6489396934290139 0.5620187972237680  
0.4051390485608841 0.2387746038258038 0.6367216681148025  
0.4896914786908999 0.5613560413040076 0.1415740809454221  
0.8949091739879494 0.0658322741061915 0.0900483076125178  
0.9964001761616945 0.7335543678895529 0.5859303764915069  
0.9995014432403784 0.5685915134580373 0.5855796878602684  
0.8969755555491377 0.2340972167067460 0.0914597349611415  
0.4865629022475808 0.7315050204685655 0.1362111819706600  
0.3912352438456242 0.0649212027882570 0.6188658642993133  
0.2976306682911023 0.1591118753215741 0.6294757454780205  
0.5907438790969552 0.6474097962809043 0.1390038083115556  
0.7931512468877890 0.1508192372292685 0.0731881995325666  
0.1026639518331569 0.6526953033900323 0.5703466478370589  
0.2987349071163400 0.2756507836415720 0.5349841671502431  
0.597903959306192 0.5313942972445762 0.0364782640164589  
0.7766268687865157 0.0292970719120719 0.1547306801435778  
0.1132371094325058 0.7738676840403099 0.6529280274992925  
0.1170920112556309 0.5303951443963245 0.6517271473621945  
0.7783010254882594 0.2726121426619387 0.1518733735467351  
0.5982723025143448 0.7659932209251077 0.0463188269470013  
0.2713835260780002 0.0362875707654855 0.5549139231518301  
0.3246369826570534 0.2543909630619318 0.3414894551835520  
0.5750631385854920 0.5520176079885599 0.8393367979727925  
0.8252743084121551 0.0586583323458684 0.3382996181778839  
0.0620626994683338 0.7428804431212022 0.8331252558945805  
0.0632296889092272 0.5635471383556536 0.8287219417795780  
0.8349446473868894 0.2394854871946131 0.3272568129713641  
0.5749448714874532 0.7555289393071832 0.8466723267109357  
0.3249713169275977 0.0634357470622113 0.3753764598776951  
0.3980780717697714 0.1512349105217291 0.2758827682082647  
0.4924600542029125 0.6495296209625625 0.7839933245691807  
0.9014583866242185 0.1483427276179672 0.4305902920932193  
0.9923133421151583 0.6509816246867367 0.9328935570812004  
0.5612997974664262 0.6117839217419248 0.5302074636821916  
0.4179541943335358 0.6306273546233018 0.5951289970330049  
0.2475791865158502 0.6900570149815960 0.5222976893601023  
0.6002435900279048 0.7119580430871315 0.6547587351252184  
0.2714518906852170 0.6099041926486113 0.3756235798068559  
0.3063639179328518 0.5726545410695359 0.4644842885366803  
0.6227270215386009 0.4645623240105243 0.2976977647425824  
0.2712326802835212 0.3386149164943617 0.7977019780692944  
0.1236088256957809 0.8295637090020737 0.4031787652706573  
0.7715949847510504 0.9745453130723614 0.9020873105011831  
0.7740309698998348 0.3268120217730514 0.9011980245639859  
0.1239281625316277 0.4744774210368620 0.4021374680368878  
0.2737905760314220 0.9814285014731151 0.8021702851392899  
0.6231160216258531 0.8291718833819424 0.2939738375133610  
0.5190661509792619 0.4363389812297543 0.4576175267374950  
0.3780381616248356 0.3658059027195674 0.9459317529799015  
0.0222415664944352 0.8641085159163829 0.2485524840176389  
0.8721695779161506 0.9348956178482145 0.7472959294311919  
0.8749299070540304 0.3649539277720070 0.7480862326873614  
0.0228988596747795 0.4342220721431768 0.2480724031833313  
0.3651936107208473 0.9332646625497998 0.9628460606677031  
0.5213249463203935 0.8667129233384905 0.4484183927442752

0.4692263855532474 0.4520532987440611 0.6708465222037658  
 0.4343825971244551 0.3470695517687636 0.1589654720274057  
 0.9719586938939458 0.8531792886995556 0.0313757618621515  
 0.9215260054277693 0.9461661621138640 0.5299068293716090  
 0.9243068364269288 0.3504706394319543 0.5300595408074203  
 0.9734867026079318 0.4476738368023966 0.0301755804773096  
 0.4177175436743957 0.9489424880478234 0.1784534365479761  
 0.4662553345403291 0.8441346186081199 0.6595855833309672  
 0.3165347518530148 0.4542757446038361 0.6461463768373740  
 0.5864177490063486 0.3432700627711091 0.1495565355447196  
 0.8187957056013200 0.8508744371863727 0.0434767296782808  
 0.0755069847982461 0.9515217002227401 0.5470717156835202  
 0.0798663891584485 0.3495270254671936 0.5448954154904475  
 0.8185851905715775 0.4501944874168811 0.0460728137775991  
 0.5724392790332946 0.9541694210779003 0.1576206669366064  
 0.3158197732138725 0.8576103930576999 0.6593564556372855  
 0.2635922801020292 0.4279283448943775 0.4268481140609358  
 0.6337232438148196 0.3675595361128396 0.9334754113232764  
 0.7702030439966854 0.8596638082188357 0.2659978995136720  
 0.1252836030673563 0.9396611060758470 0.7714141970303821  
 0.1226224457410808 0.3633829815238557 0.7709570904138134  
 0.7711136720939564 0.4360296367230784 0.2710968032613270  
 0.6269836631246211 0.9392276630479416 0.9347119677223872  
 0.2664056761843845 0.8670412825268363 0.4429758016500307  
 0.4003824772949556 0.4640023972898799 0.3195867325272836  
 0.5003954244561628 0.3283043386180357 0.8208809117749970  
 0.9013134369581766 0.8220877563221586 0.3754384820957012  
 0.9932832670416579 0.9765209200776495 0.8765285850161957  
 0.9941393532337935 0.3222549306769655 0.8783661214298127  
 0.9021643136194502 0.4747645953163823 0.3773304267267704  
 0.4893372807723951 0.9581390388787108 0.8264631142283528  
 0.3963470839977652 0.8240708970551399 0.3310019911134564  
 0.6270843370130558 0.2274606599023160 0.2888834796166151  
 0.1168971611450528 0.0715546269941058 0.4078928473691187  
 0.7747382323838630 0.7283411082606489 0.9119824974698467  
 0.7747632843220208 0.5730274604726057 0.9117153851826331  
 0.124655960461219 0.2256145731828529 0.4096419074937658  
 0.2701096802229079 0.7301374209036000 0.7906423669712372  
 0.6205505601493290 0.0688904445395604 0.3024351070355720  
 0.5179501888409191 0.2739268856102229 0.4466399501363472  
 0.3828086197370569 0.5227774358394155 0.9455354349202068  
 0.0168661427073555 0.0202316660574083 0.2560161574747044  
 0.8710775245116018 0.7778484373992378 0.7582557022215803  
 0.8735531642267516 0.5216547259646727 0.7598341882691748  
 0.0255748759926160 0.2770301254071968 0.2598508824521145  
 0.3646727441694318 0.7766796310917210 0.9544582539412567  
 0.5160897700166730 0.0238415708347797 0.4511582636392159  
 0.4827291253360854 0.2215160189171284 0.6568282879874462  
 0.4098818026042331 0.5673636762798623 0.1560309347447664  
 0.9721940379748794 0.0712418368136581 0.0565483342108858  
 0.9183144784723523 0.7269114586261969 0.5566204297112290  
 0.9211427674425192 0.5718191134702971 0.5573935051567465  
 0.9746326830283493 0.2267530329970545 0.0594713071011446  
 0.4073571637957693 0.7238490281919596 0.1581380546056037  
 0.4676334842071991 0.0651187950662919 0.6574593824213423  
 0.3247073019701121 0.2362620173965403 0.6346520634536983  
 0.5690541681537122 0.5682925167950904 0.1367224703749483  
 0.8160587971990308 0.0721723912951404 0.0686476129655184  
 0.0755119487232533 0.7306038940860070 0.5661100865336183  
 0.07885211052321594 0.5734351968515669 0.5660346929381950  
 0.8181275406612746 0.2287698950076803 0.067397207986871  
 0.5664905708908560 0.7260088257666956 0.1411761728173768  
 0.3128862275651706 0.0789182195579776 0.6387647069453692  
 0.2675922293349954 0.2759144165574289 0.4217371198242315  
 0.6274843112528562 0.5244483412981225 0.9228637343212791  
 0.7685409930919528 0.0183133525431846 0.2763194610813622  
 0.1223161090055743 0.7806659734107460 0.7753777854531487  
 0.1233785419004607 0.5217521188183721 0.7752538648631846  
 0.7731686321606005 0.2778221304172916 0.2746697848589368  
 0.6265322508383425 0.7791075420505836 0.9328947586762897  
 0.2647181077644735 0.0257264672345878 0.4332294884927204  
 0.3983031298181866 0.2304775114875796 0.3074793024758471  
 0.4978103972622916 0.5717389552500950 0.8200431231468517  
 0.8976675779539952 0.0713782011961133 0.3884628272866159  
 0.9922151929041310 0.7277383347920314 0.8895695535516047  
 0.9944277694909953 0.5742009585678242 0.8889963879409543  
 0.9032635815904325 0.2254349624548187 0.3886525825433029  
 0.3962241266817776 0.0751713701011855 0.3217049457449651

Structure TS reaction 9→30 S=8/2

1.0000000000000000  
 20.1473052208878016 0.0000000000000000 0.0000000000000000  
 0.0000000000000000 19.7681594983396991 0.0000000000000000  
 0.0000000000000000 0.0000000000000000 13.2309279702280005  
 Al C Fe H O Si  
 2 1 2 10 198 94  
 Selective dynamics  
 Direct  
 0.2734053554943472 0.5724239192919214 0.7884188791596287 F F F  
 0.4921621138011218 0.7349295528252782 0.8154075339605171 F F F  
 0.5446824101412898 0.6618887026534841 0.4334024414290282 T T T  
 0.3212187179384265 0.6240994105738648 0.5913097414038679 T T T

0.5073651236436080 0.6657417019351229 0.6195504114537317 T T T  
0.5525841828142505 0.5584975609243654 0.5439267975509300 T T T  
0.2030742274189341 0.6792017279920619 0.5602336475501298 T T T  
0.2460518624251752 0.6669009732766631 0.4617178654460444 T T T  
0.6065671281941580 0.7325333592093161 0.7216286282735800 T T T  
0.6361491873969846 0.6783372493670253 0.6453841384123767 T T T  
0.2443167836103668 0.5722695634036191 0.3648992201347929 T T T  
0.5696004586515192 0.6214384967753545 0.3927587098132114 T T T  
0.5736582131497217 0.7073950520333716 0.4472231062128148 T T T  
0.4223348428982162 0.6098340492266507 0.5107823056822648 T T T  
0.4918659317145134 0.6686745563248343 0.4178496372147810 T T T  
0.7024291770994751 0.4692809068164649 0.3130607957410732 F F F  
0.1922804316437450 0.3338125455092040 0.8141897550836035 F F F  
0.2038480428481080 0.8257777221284002 0.3954032237253386 F F F  
0.6915953078625208 0.9806997514186691 0.8923147344406956 F F F  
0.6938086191254982 0.3227306682558648 0.8886375218066149 F F F  
0.2045293438473195 0.4799266399142255 0.3896223636640030 F F F  
0.1953924235484337 0.9722048209857164 0.8095481062864494 F F F  
0.7037519279981623 0.8234582393472820 0.3052424969369838 F F F  
0.5877672704509251 0.4655852873536688 0.4103197707764252 F F F  
0.3058728209456589 0.3400414220760410 0.9094356101551782 F F F  
0.0935668335863724 0.8354600882912706 0.2890017322513074 F F F  
0.8045557792556863 0.9696264613073993 0.7887862442911597 F F F  
0.8054802625068902 0.3330965201514857 0.7886577728822388 F F F  
0.0919132212112643 0.4682166820965179 0.2899167815711579 F F F  
0.3088735976226928 0.9818567709478216 0.9118428163390391 F F F  
0.5928816814969053 0.8405304561201348 0.4046527894140937 F F F  
0.6003122069172449 0.5350100238362927 0.2399815528793994 F F F  
0.2974093560966011 0.2740657010110255 0.7347158109609353 F F F  
0.0943174578111510 0.7609614501105000 0.4552703343947897 F F F  
0.7992425348110359 0.0426182019906634 0.9566502759301372 F F F  
0.8019559972329304 0.2595254679733614 0.9564445996628095 F F F  
0.0972820937026029 0.5447055078042951 0.4546376690500580 F F F  
0.2911141691670167 0.0542664184731194 0.7479898671322900 F F F  
0.5943649714405197 0.7606347862937781 0.2437422256874697 F F F  
0.6002228457562282 0.3985310122895385 0.2407941877956574 F F F  
0.2895391363276048 0.4096713309670861 0.7409814578787817 F F F  
0.1027901695862994 0.8950652942370851 0.4682749662409620 F F F  
0.7926621790107902 0.9080983565196092 0.9642460700704802 F F F  
0.7932087055971095 0.3937351650329362 0.9671138891134348 F F F  
0.1037545602967143 0.4105732929622405 0.4708123706825731 F F F  
0.3076651878703132 0.9214696936443829 0.7330248814458997 F F F  
0.6070326265937354 0.8943764463745012 0.2210870309005415 F F F  
0.5209001203901451 0.4563793074002689 0.5774278270849535 F F F  
0.3810115667090344 0.3569975724041115 0.0695650090035471 F F F  
0.0220425768800396 0.8605038461309533 0.1264457737888875 F F F  
0.8717907657398101 0.9375123766106483 0.6248069990796736 F F F  
0.8755041833870791 0.3623765347777592 0.6262108227241754 F F F  
0.0228809501302294 0.4383807972992884 0.1262758852150299 F F F  
0.3677992855198653 0.9451897622657057 0.0817105235086828 F F F  
0.5202371955240750 0.8614235488685651 0.5672183281318581 F F F  
0.5114730846290527 0.3555073053986817 0.4414928533548164 F F F  
0.3918105154577702 0.4434522439515263 0.9144206945000235 F F F  
0.0119916121121761 0.9414072299124214 0.2882574412733803 F F F  
0.8780833455417536 0.8575163456452231 0.7879152977852684 F F F  
0.8816159826791861 0.4426463931502909 0.7896505654599437 F F F  
0.0180774495963831 0.3569884457539558 0.2887706164940340 F F F  
0.3464705039588551 0.8564090447399693 0.9322781977115326 F F F  
0.5107948207186936 0.9464493798134299 0.4098644501624165 F F F  
0.4559859479258748 0.4751646803625675 0.4088813990758169 F F F  
0.4347953506239222 0.3191906692298687 0.8935767870476710 F F F  
0.9630161654248397 0.8189756405836590 0.2962280457945496 F F F  
0.9372273526379757 0.9755477258309995 0.7895379146947832 F F F  
0.9364627339112133 0.3219884075487442 0.7934068950704116 F F F  
0.9605092170470755 0.4765364675681525 0.2933421161282723 F F F  
0.4395404882326801 0.9520286307379919 0.9178245355912367 F F F  
0.4636472078618468 0.8216321097383670 0.3964314085087537 F F F  
0.4700075126973360 0.5223284387417380 0.7306934920404018 F F F  
0.4236344601264790 0.2747947236481849 0.2122227932853704 F F F  
0.9804070612726790 0.7783395670897448 0.9842026395022359 F F F  
0.9108683760119902 0.0210322580516262 0.4820633011960354 F F F  
0.9108558391637800 0.2756987670069577 0.4854055616884523 F F F  
0.9855235135755791 0.5225420440757063 0.9831683974884697 F F F  
0.4093704424466225 0.0240607257403340 0.2267271084114242 F F F  
0.4758036743392893 0.7634562438547832 0.6890094666539923 F F F  
0.3947153340288594 0.4376944600481707 0.6263272958548143 F F F  
0.5092274365864498 0.3513979148956707 0.1135489397860852 F F F  
0.8958069356266662 0.8646919142518996 0.0717518682925729 F F F  
0.9979311256861010 0.9377997703622185 0.5703925307482649 F F F  
0.0010930897260479 0.3583696886091943 0.5676083541510479 F F F  
0.8968232209339817 0.4399885250365188 0.0707512557523842 F F F  
0.4945186226823779 0.9386475025237999 0.1401181655895840 F F F  
0.3925515733456066 0.8581715144897828 0.6150456250664007 F F F  
0.4918656650008622 0.3892016437959356 0.7436813750421152 F F F  
0.4272434195321750 0.4082385031579392 0.2422367725312071 F F F  
0.9893164614049255 0.9094417879513514 0.9466811990509711 F F F  
0.9055569052210757 0.8893700728070044 0.4454337299737361 F F F  
0.9076679399817067 0.4068307699074438 0.4451626523891150 F F F  
0.9889479883364487 0.3904125551518263 0.9475070205382536 F F F  
0.3978193509779899 0.8914409177212690 0.2567874044070422 F F F  
0.4828139000784333 0.8878817500263736 0.7551382907403124 F F F  
0.3064084091811523 0.5340538924523841 0.6762208514523422 F F F

0.6020875989312273 0.2695359188186899 0.1893818880365856 F F F  
0.8111385117633958 0.7762875129958502 0.9945765631895256 F F F  
0.0851821927261724 0.0259414214110549 0.4970906843152463 F F F  
0.0943906980006091 0.2767016784892533 0.4947495473221295 F F F  
0.8071039791098755 0.5255941172110994 0.9995393624240876 F F F  
0.5821923182900619 0.0261632344725413 0.2130852103057350 F F F  
0.3037969519678185 0.7867568977402186 0.7166771909394853 F F F  
0.2733067571893955 0.4339580723503857 0.5485748981512018 F F F  
0.6341884651507499 0.3636025494064015 0.0557899705801503 F F F  
0.7723874759420681 0.8565163467788111 0.1429894058691019 F F F  
0.1197360952707456 0.9466225197091802 0.6490444725846416 F F F  
0.1218441827881804 0.3551795296534834 0.6490027366875211 F F F  
0.7747486291160612 0.4431886780463543 0.1489491792037043 F F F  
0.6108526325865355 0.9584620864123039 0.0478624653404722 F F F  
0.2645594644854867 0.8643637004569911 0.5653213140897009 F F F  
0.3311087437125835 0.4402442554631207 0.3667003914590197 F F F  
0.5643961296209383 0.3378417457541403 0.8912892920056379 F F F  
0.8328766208976504 0.8206769317290181 0.3125533846758444 F F F  
0.0666113717714651 0.9800184182404337 0.8245460002356708 F F F  
0.0651475786673359 0.3188769265210425 0.8224701084383739 F F F  
0.8309330040616061 0.4779843990073473 0.3218693294088197 F F F  
0.5652791841035878 0.9626373946244939 0.8610524924796437 F F F  
0.3330511309038613 0.8299850072857566 0.4036967334947192 F F F  
0.2388727651043041 0.3520401333031273 0.3999052516198631 F F F  
0.6430210055897092 0.4461655303575753 0.8988740890513469 F F F  
0.7725577483758883 0.9391139108591631 0.3020945106411190 F F F  
0.1244004568405899 0.8599858598022081 0.8036376300464028 F F F  
0.1132061449176192 0.4424260441895385 0.8018573774005091 F F F  
0.7737222058873883 0.3574753477952726 0.30559532262923691 F F F  
0.6427438618169319 0.8594136413457534 0.9192166246418338 F F F  
0.2642308709947088 0.9454173956315230 0.4053728328997366 F F F  
0.3903981171508590 0.5373848018206786 0.2660563582170994 F F F  
0.5088824587240453 0.2565614227662536 0.7603333938120684 F F F  
0.9038354924578371 0.7541777512728487 0.4427770433960276 F F F  
0.9840433128069037 0.0448432578052547 0.9417202236958104 F F F  
0.9862441495730323 0.2551891724026945 0.9463759762382793 F F F  
0.9085513906112510 0.5425102193002687 0.4455135161270078 F F F  
0.4714662111369279 0.0235606689893189 0.7590330594378401 F F F  
0.3911490808687503 0.7554189130058475 0.2668256950298655 F F F  
0.7043767858916326 0.2431089172908045 0.3132576181189677 F F F  
0.1922256098680464 0.5512224257396525 0.8112745627302829 F F F  
0.1961522513174287 0.0600478790040881 0.3944171455118877 F F F  
0.6946057437646402 0.7368342885676924 0.9145027729971247 F F F  
0.6941316591493134 0.5687557633541687 0.9132094804852429 F F F  
0.2056580189326880 0.2250933837316538 0.4105666580721845 F F F  
0.1913112602800027 0.7439648315272720 0.8043815317540322 F F F  
0.6974831702462794 0.0482275101359306 0.3104363448991521 F F F  
0.5835079468871243 0.2504128044092369 0.3867107194438404 F F F  
0.3225321057096551 0.5578962948803721 0.8913923979614040 F F F  
0.0848212726433317 0.0532027120218928 0.2985347705023784 F F F  
0.8007999607539844 0.7485781971700973 0.7984956086321944 F F F  
0.8013740691496665 0.5498394204148127 0.8013006222216958 F F F  
0.0971380961566553 0.2489903293918587 0.2990518424489252 F F F  
0.3048735937128413 0.7327001559747757 0.9010468689103917 F F F  
0.5856333730101682 0.0578374379919069 0.4086288224106411 F F F  
0.6153505780271402 0.1486172490236939 0.2657027998320629 F F F  
0.2821574181904509 0.6561406938756775 0.7386358575544918 F F F  
0.1005302846556759 0.1498286307550103 0.4366662692807850 F F F  
0.7949956445226931 0.6508931928872883 0.9367048697247284 F F F  
0.5263761426997817 0.2498063074411903 0.5636900206712312 F F F  
0.3738598851835064 0.5251277247133572 0.0698885518658727 F F F  
0.0165243049111723 0.0255462759482086 0.1332672545964613 F F F  
0.8741709445635379 0.7712752501431979 0.6357538282120743 F F F  
0.8769610741387837 0.5282528678774199 0.6381882486670776 F F F  
0.0205761486664144 0.2698212500833748 0.1381637195511729 F F F  
0.3655038682836960 0.7654398564806897 0.0730551087003022 F F F  
0.5135744934374529 0.0269246877848062 0.5700157296119812 F F F  
0.4503643003690172 0.2405097628237911 0.4019990693165099 F F F  
0.4534441608072441 0.5608497476843795 0.9218775445126113 F F F  
0.9535158400145392 0.0609256191508365 0.3010756007013029 F F F  
0.9325504048065554 0.7361666451734337 0.8074413402436704 F F F  
0.9314397372861833 0.5659075525874329 0.8115633174821610 F F F  
0.9660610903269458 0.2350158158302875 0.3131592312609115 F F F  
0.4357112012977069 0.7582525167488470 0.9044839893307710 F F F  
0.4546117898407260 0.0681802022615514 0.4028852031531827 F F F  
0.4953778977435590 0.1406751675291886 0.6712974154897609 F F F  
0.3869607541960463 0.6461483494239317 0.1539997939854416 F F F  
0.9979411716950821 0.1489069334899966 0.0636796559270394 F F F  
0.8930661485926876 0.6491567016434203 0.5621399786053729 F F F  
0.4051924493881884 0.2374554294187874 0.6371672647093334 F F F  
0.4905189858552959 0.5626089235529221 0.1428048120027583 F F F  
0.895308904047783 0.0655928366123320 0.0879527089727148 F F F  
0.9954828260461355 0.7328169357369845 0.5834539131665579 F F F  
0.9984955521613301 0.5696034395553937 0.5853145680645255 F F F  
0.8972343634298312 0.2346201353447839 0.0911928538185691 F F F  
0.4876045156759403 0.7320728801081842 0.1346548223764188 F F F  
0.3914200692329786 0.0668023367513726 0.6152346991481323 F F F  
0.2965690115598605 0.1598657981661447 0.6287764004987153 F F F  
0.5918771659907947 0.6484021638937776 0.1354540470288228 F F F  
0.7938516066265748 0.1509178796182269 0.0729745035753737 F F F  
0.1025019102882680 0.6528352833256221 0.5709484188894649 F F F  
0.2993249635467521 0.2765607870373685 0.5347768957607641 F F F



0.5988229296044665 0.5297657741055559 0.0402621443714324 F F F  
0.7776467107372795 0.0292376404646006 0.1540387078321217 F F F  
0.1113118241645168 0.7745006896946549 0.6523082162028970 F F F  
0.1158751661347068 0.5300495304133932 0.6512283309328524 F F F  
0.7785052491979769 0.2724036458841468 0.1525725473153798 F F F  
0.5986724962189456 0.7675649878217641 0.0444427239914589 F F F  
0.2717272301553422 0.0370337868199044 0.5525974911708644 F F F  
0.3249617228221027 0.2558257484594222 0.3411656825934060 F F F  
0.5742982254925977 0.5540090339536548 0.8441989913218038 F F F  
0.8250865989694987 0.0595087312537643 0.3382705831023358 F F F  
0.0624686108430907 0.7434470058594442 0.8341327992341903 F F F  
0.0619629917066007 0.5632390384712167 0.8278908763498976 F F F  
0.8346827154558554 0.2400002552932676 0.3284712307079047 F F F  
0.5742208061675242 0.7553894444728826 0.8451066801263210 F F F  
0.3250043574647279 0.0623116960450574 0.3719051183339772 F F F  
0.3971101741914254 0.1522780012613865 0.2748382966251057 F F F  
0.4917536073559319 0.6488111324813701 0.7804492048131877 F F F  
0.9019567700619220 0.1485334131291722 0.4303686177781643 F F F  
0.9923603035557207 0.6512604213791136 0.9328069610888576 F F F  
0.5676057255535449 0.6035959538886631 0.5639636838006788 T T T  
0.4174503612689764 0.6379982849173178 0.5711134124446694 T T T  
0.2468573710664319 0.6883645695036844 0.5310884515689458 T T T  
0.6041513159122174 0.7151611902952243 0.6512691631055675 T T T  
0.2752291009118279 0.6086810467555063 0.3844422209455140 T T T  
0.3091811217303261 0.5736271439798210 0.4700150721674362 T T T  
0.6227919541035973 0.4669045967091918 0.2990419770458743 F F F  
0.2714870461433776 0.3391671116026771 0.7982022646261555 F F F  
0.1237507883383557 0.8293332919947147 0.4027295571172260 F F F  
0.7715711190578745 0.9749828587345775 0.9009933264800196 F F F  
0.7737958349938978 0.3272460939701531 0.9013267707782120 F F F  
0.1237890109712154 0.4751013430717919 0.4023015695015175 F F F  
0.2749005089947403 0.9816849526591369 0.8003369824940663 F F F  
0.6241091330580772 0.8299199192541664 0.2920592296917945 F F F  
0.5191222280011019 0.4359359639604108 0.4579993609171424 F F F  
0.3783174567895031 0.3656306071444035 0.9476931493486660 F F F  
0.0225845061238772 0.8641105811071697 0.2486151445916676 F F F  
0.8727798228023929 0.9351933102400309 0.7472363575735912 F F F  
0.8749366740207165 0.3651983290623662 0.7484331557080210 F F F  
0.0231934535886538 0.4347149973694613 0.2484041047289480 F F F  
0.3660409636139974 0.9334889344156494 0.9606603078385376 F F F  
0.5216959043829732 0.8681655648750350 0.4452887557983303 F F F  
0.4686814996311099 0.4506555282080171 0.6721683169271415 F F F  
0.4344161914427005 0.3480936731864048 0.1600234563260727 F F F  
0.9715797251529921 0.8533171169695208 0.0313296129405032 F F F  
0.9219481627137469 0.9464154104519196 0.5296264171714427 F F F  
0.9244268642831059 0.3506788196431216 0.5303511654852997 F F F  
0.9731097889890989 0.4480780605639012 0.0306433392310836 F F F  
0.4180799008993787 0.9498264783984709 0.1768747329771259 F F F  
0.4674893518676058 0.8423883825538780 0.6557861314071829 F F F  
0.3162920174167709 0.4546649564823255 0.6468842369958097 F F F  
0.5860615226451529 0.3455477217487868 0.149716269679912 F F F  
0.8182616047427871 0.8514333624208561 0.0428557558853697 F F F  
0.0760752897248693 0.9514589814380159 0.5466897241045316 F F F  
0.0800792643513759 0.3500371980468486 0.5450628207601298 F F F  
0.8183133373547946 0.4504846295930847 0.0464221637982121 F F F  
0.5730528262062151 0.9542675654970481 0.1553529595538805 F F F  
0.3166952282330229 0.8573521180742674 0.6582935231041063 F F F  
0.2633689445157188 0.4285261024684885 0.4277710459601565 F F F  
0.6332429222826121 0.3678977889862551 0.9331037491886320 F F F  
0.7704765781830218 0.8607417642488855 0.2653659914348481 F F F  
0.1265132413743757 0.9392176688739013 0.7708141419569898 F F F  
0.1230907889920232 0.3638079324479193 0.7711915060226175 F F F  
0.7707517373014312 0.4362805536991914 0.2711049554729499 F F F  
0.6267592458574995 0.9393139565812376 0.9311211982029874 F F F  
0.2664361648886953 0.8669247827071516 0.4424239788162225 F F F  
0.4004948433408302 0.4651765224830200 0.3206483071883213 F F F  
0.4996886546934576 0.3265217331032986 0.8220813737705086 F F F  
0.9014959715468152 0.8223230548432738 0.3751313081474024 F F F  
0.9941467853641015 0.9763911598347619 0.8763210653006013 F F F  
0.9942669575489944 0.3228191080615872 0.8786673591712173 F F F  
0.9020985805368582 0.4748484408601925 0.3775404034568339 F F F  
0.489690440565999 0.9561429805554482 0.8225445714207211 F F F  
0.3961812482148375 0.8255511681066778 0.3292534229080104 F F F  
0.6266377676931469 0.2281035304293226 0.2888770075277591 F F F  
0.1172462064753717 0.0718897655410657 0.4076205051030826 F F F  
0.7743623920254734 0.7285540024142989 0.9116060427595087 F F F  
0.7743196119805091 0.5732000320574500 0.9126505112187786 F F F  
0.1249284503770696 0.2260056050551142 0.4100808946358185 F F F  
0.2703640451375477 0.7302487105508462 0.7900367416197014 F F F  
0.6206508108793685 0.0700087453386828 0.2988971912215277 F F F  
0.5178481249128879 0.2737125727734835 0.4474338752381399 F F F  
0.3828527342663293 0.5227120001220342 0.9474395799410402 F F F  
0.0168100119675927 0.0204028352591266 0.2557577795305761 F F F  
0.8714093257144384 0.7782012818434865 0.7580535482871582 F F F  
0.8726607841318881 0.5218706201673626 0.7604606260152025 F F F  
0.0256478897778578 0.2774162153290476 0.2600581774128159 F F F  
0.3648806918036058 0.7771481323932932 0.9511966862101744 F F F  
0.5163228965635795 0.0248277983069940 0.4474757102984910 F F F  
0.4829006428470137 0.2208824948168697 0.6576957722851517 F F F  
0.4108162255691923 0.5683779613421365 0.1572526415832840 F F F  
0.9729953547737296 0.0714500560937239 0.0557883196627387 F F F  
0.9170625703329875 0.7269636776173556 0.5557618418086037 F F F

0.9199151742489846 0.5721801780088214 0.5576743455929360 F F F  
0.9749154515933114 0.2271369230252489 0.0595169356762852 F F F  
0.4085175213576733 0.7247225812226219 0.1563189082429233 F F F  
0.4677796485515628 0.0647734586274211 0.6541402535622467 F F F  
0.3248236332361145 0.2366416989160953 0.6344531963639994 F F F  
0.5700105469643333 0.5693752359639248 0.1383840270774925 F F F  
0.8165796468948798 0.0722624945780552 0.0676856167423736 F F F  
0.0746305480137153 0.7306337593919778 0.5651958263825776 F F F  
0.0778188390365315 0.5736937913754474 0.5660224137426297 F F F  
0.8183071952809300 0.2290296502711016 0.0675898567517521 F F F  
0.5676071734999084 0.7268751507166797 0.1391321253505495 F F F  
0.3130722300698423 0.0797663846670744 0.6364713259549148 F F F  
0.2679231875016654 0.2766782506663219 0.4216804956882783 F F F  
0.6270062938800365 0.5246737137959627 0.9253384693084854 F F F  
0.7686974358101821 0.0191031070955248 0.2755974501277905 F F F  
0.1223031014189573 0.7803950564066682 0.7744246540114901 F F F  
0.1227092994276830 0.5223028661461413 0.7748672879780898 F F F  
0.7728999344487804 0.2780254614269495 0.2752489067424406 F F F  
0.6261539429130636 0.7793787366678160 0.9302747340858986 F F F  
0.2647667432412675 0.0257330589310598 0.4311612033948009 F F F  
0.398665564166384 0.2311154152285724 0.3083437909026117 F F F  
0.4971516765238491 0.5716610568702336 0.8202355787356268 F F F  
0.8976553390881108 0.0716506257346694 0.3880375537207357 F F F  
0.9922403825632955 0.7280049152687269 0.8894733969407369 F F F  
0.9935749475178639 0.5744509271298170 0.8890323539166118 F F F  
0.9032740931241108 0.2257756435476352 0.3890352232901435 F F F  
0.3961911030933010 0.0757834039670513 0.3189853891816412 F F F

Structure 31 S=8/2

1.0000000000000000  
20.1473052208877697 0.0000000000000000 0.0000000000000000  
0.0000000000000000 19.7681594983396742 0.0000000000000000  
0.0000000000000000 0.0000000000000000 13.2309279702280254

Al C Fe H O Si  
2 1 2 10 198 94

Direct

0.2715604794317241 0.5723834841399830 0.7915443513261978  
0.4940295390877208 0.7323455023027612 0.8130307964088682  
0.4955093476802223 0.6743309709926474 0.4634419538808555  
0.3174508340627770 0.6171180986790957 0.5899199293027735  
0.4893583766087379 0.6719186628134971 0.6131244942325798  
0.5560301285396838 0.5341979619042715 0.6010897079877252  
0.2384295299012717 0.7026998166306330 0.5773198883651061  
0.2315134578242865 0.6582982249644544 0.3932995002645371  
0.5962388447537756 0.7292485597347215 0.6986501113998790  
0.6133207765006258 0.6630465479723519 0.6363007432086740  
0.2321369118406705 0.5966382719884059 0.3230164573709530  
0.5780775395282338 0.5776809237189834 0.5108690251296591  
0.5476799737241963 0.6854575021673235 0.4464824061328098  
0.4627001025481381 0.7163659237833500 0.4433619810094664  
0.4768891892962531 0.6265853485881837 0.4325862449490142  
0.7013460353121961 0.4709306297568920 0.3161615045468277  
0.1908467910565281 0.3308908784708353 0.8152237662471085  
0.2035474124740244 0.8248930205041796 0.3927066607046059  
0.6918933098656016 0.9809659019112856 0.8902487759883141  
0.6927028278224425 0.3220427991788538 0.8934990749530343  
0.2024172016333912 0.4804897033175043 0.3927516893664497  
0.1953611021905111 0.9734637880686622 0.8048167997212321  
0.7041443641398943 0.8249388778906145 0.3038942806056061  
0.5861863247128744 0.4712163957511123 0.4131993593926648  
0.3042320977807725 0.3421215839067624 0.9117114675944039  
0.0931708271884059 0.8336717102757074 0.2866328028030701  
0.8046908477558345 0.9697586298329963 0.7869757159985723  
0.8029271637965808 0.3356704237372530 0.7901491937727190  
0.0909544824194942 0.4680363277806458 0.2895697209137454  
0.3085072699508593 0.9795060818471515 0.9079776125488550  
0.5923856567797862 0.8371180916801585 0.4014828100482576  
0.6015193157632109 0.5418076357801940 0.2442311275189983  
0.2984299143457323 0.2740031956327252 0.7388801761404160  
0.0955367250130937 0.7583915326440684 0.4538287422084258  
0.7989367404201357 0.0435088946288647 0.9541773429050608  
0.8037819844405590 0.2625959552032156 0.9587133385615063  
0.0915342719539130 0.5418297205589938 0.4567622554348606  
0.2935770261825947 0.0528456622686443 0.7439732787592269  
0.5970808111898568 0.7614327226602613 0.2356618789532100  
0.5964568939354359 0.4056710176487286 0.2411926274443046  
0.2860829810861428 0.4095618231210930 0.7419386384383213  
0.1014412974364743 0.8925427142322745 0.4653130794375793  
0.7928251822080750 0.9087013834371407 0.96292251655659473  
0.7901600569946441 0.3966196270497560 0.9685105149754483  
0.1027532245963545 0.4083227921904436 0.4680773990181694  
0.3067019225386299 0.9197967889697033 0.7297795514027879  
0.6067268033994287 0.8957979360306718 0.2211293977205110  
0.5201130348303575 0.4491674536203723 0.5796065523404735  
0.3785977230488409 0.3576637689321414 0.0727786933444035  
0.0222945654130846 0.8611836925798092 0.1246478444051293  
0.8722360690111313 0.9376454104659457 0.6235036181890529  
0.8743956400483568 0.3613530115627221 0.6273108657989134  
0.0215710679356537 0.4394296965012298 0.1263335579809016  
0.3685295825448615 0.9431023579669390 0.075996270848118  
0.5198623602688750 0.8594051697736177 0.5639997240751271  
0.5161010458950496 0.3558272346106929 0.4317214798094510

0.3924526334864514 0.4438044798691071 0.9174352695420459  
0.0134327378793043 0.9415076323388956 0.2868784274239890  
0.8783938774133782 0.8578723129705712 0.7869509254099452  
0.8815535089871991 0.4434065660765942 0.7885873249742368  
0.0161448747887745 0.3574298773852141 0.2879961528899532  
0.3531894020831880 0.8552642802021729 0.9229155012216500  
0.5152139098133401 0.9462390694936553 0.4067370776422528  
0.4545597985057952 0.4742018242590634 0.4119107093233297  
0.4329971528270987 0.3182375309149876 0.8986893801928949  
0.9625521649773138 0.8197029947216324 0.2939039585159438  
0.9370996566602223 0.9763923584201627 0.7886776244686929  
0.9334566326593688 0.3215948338526729 0.7966985224480096  
0.9590321871111749 0.4767546364530268 0.2939932677106974  
0.4402856565195761 0.9560253972779235 0.9129708998516364  
0.4624598862594833 0.8250660730754583 0.3917698469547293  
0.4732758198822659 0.5189950729476983 0.7302004692986719  
0.4225828856989012 0.2776843818469841 0.2175092987060464  
0.9813365449649532 0.7787650963124946 0.9821354136318347  
0.9104688055329069 0.0212337079532861 0.4806053306218014  
0.9127722452224596 0.2754661956337361 0.4871467740047287  
0.9815633798488473 0.5236181128841544 0.9840650298778363  
0.4088882554847423 0.0276161280285178 0.2161089024639748  
0.4737197453470732 0.7653010900741533 0.6905137748619262  
0.3931164477480371 0.4348659158154194 0.6309558366962043  
0.5070850987189620 0.3539317455249790 0.1162044029949250  
0.8961899492904309 0.8647776094028368 0.0698518257485854  
0.9981678965035372 0.9383923490300077 0.5684041571642973  
0.0007549394669748 0.3594115783756359 0.5715736207391091  
0.8954740149604659 0.4385246693645570 0.0724912276278759  
0.4946423042753283 0.9391615210240000 0.1374097125993283  
0.3920101281127508 0.8585004755680635 0.6114205461381286  
0.4902826134598481 0.3858175001310974 0.7476694997323453  
0.4245017677287376 0.4115161727345504 0.2431462596928662  
0.9893925042359991 0.9097743035100531 0.9449838225255410  
0.9055920667925824 0.8897615174964871 0.4438183406977320  
0.9077139408243746 0.4066835730455138 0.4470629984840834  
0.9880107361652943 0.3919065027463419 0.9472045745920100  
0.3963500351486269 0.8964975076368391 0.2554035144536567  
0.4826832449485471 0.8905155304995817 0.7508893061635554  
0.3058607071939349 0.5332701767701810 0.6796909225321437  
0.5992205605003573 0.2747819347907241 0.1990194979276834  
0.8110091326749974 0.7766895420120358 0.9937505461433457  
0.0868972729691539 0.0243439195800546 0.4942833722363485  
0.0927856788061098 0.2757091217432023 0.4999063851053454  
0.8078831494408898 0.5272987640088208 0.0039934660909778  
0.5833660034198453 0.0274029992220444 0.2057694497213161  
0.3032486411479736 0.7851033703787216 0.7105976049127122  
0.2723815959620072 0.4353539663064503 0.5490187586959345  
0.6325407485681510 0.3641154226296746 0.0597842907439636  
0.7728119175738130 0.8574577347852379 0.1416230524108644  
0.1205340681534703 0.9441997684383510 0.6452144013283824  
0.1224536804406325 0.3576040054599162 0.6494991619213305  
0.7734433810026955 0.4445158613117028 0.1517102483267761  
0.6106387535234984 0.9548934047920883 0.0438143154469415  
0.2634471983555646 0.8637153826195323 0.5620209040987147  
0.3288979769790105 0.4448318551798203 0.3679582987218212  
0.5631138692562061 0.3351602794250644 0.8957782865919235  
0.8328175823809351 0.8211226383685116 0.3115972960635699  
0.0668556184396484 0.9773865469444650 0.8202307462869639  
0.0628199500138752 0.3206879319448165 0.8199883067337707  
0.8297997876922317 0.4776705876488581 0.3255065079179428  
0.5659971584223303 0.9647227783990590 0.8564351651877317  
0.3326944174522870 0.8334135967734567 0.4010336582703251  
0.2398789385072571 0.3525079608298735 0.3999832827073029  
0.6396766205827974 0.444947732833059 0.9003828431774308  
0.7732881614318340 0.9402988353650809 0.3002736804061431  
0.1283632167104989 0.8585233074597011 0.8006331200441649  
0.1166915006450346 0.4424626120502845 0.8058807817877212  
0.7709649015770967 0.3580422917629593 0.3068499200771208  
0.6418853377801612 0.8593069277424678 0.9090741948039158  
0.2605315580078065 0.9463594565669498 0.4034234201116299  
0.3910753178776243 0.5409424391454938 0.2693225808696802  
0.5063806052900808 0.2534776930912638 0.7659597995476172  
0.9041339123340822 0.7545668104382928 0.4415740022650552  
0.9874447841118300 0.0451517011689597 0.9390939658073252  
0.9871522789807164 0.2565130048231649 0.9477194642768572  
0.9077010713410881 0.5424447258234329 0.4476532317841043  
0.4727788252489855 0.0262152069468420 0.7532881006065447  
0.3901220414462639 0.7596154309540067 0.2628455014267345  
0.7042245893563274 0.2429649394535326 0.3146316013404151  
0.1896698262879547 0.5551385719596352 0.8124408555541615  
0.1961807150382829 0.0628831907355210 0.3913040041742897  
0.6951358170306726 0.7371225334620998 0.9124817933349237  
0.6932788310510276 0.5670205751924531 0.9198908608056280  
0.2048037676452545 0.2260514025486963 0.4154776708636522  
0.1932438661148146 0.7414566014488839 0.8036566924319005  
0.6974577354889734 0.0492437359673354 0.3058471339359675  
0.5842567039246562 0.2443828658369155 0.3937562802513688  
0.3196703115564011 0.5561333756784020 0.8948427046699661  
0.0839738458268815 0.0548810554605609 0.2971413673196417  
0.8021527607303555 0.7481249320671053 0.7979733696979233  
0.7984181954079012 0.5479421052243443 0.8047531243532804

0.0970166008148852 0.2508390408005619 0.3030233187894211  
0.3082296871885752 0.7320430197173204 0.8962128847799530  
0.5849080812756877 0.0602891536111039 0.4017221254897021  
0.6158647356872048 0.1501676486916102 0.2590936912810363  
0.2844686041489045 0.6543659901070248 0.7355705006990026  
0.0996236560706817 0.1498777759168703 0.4378151705785387  
0.7940800775709730 0.6509456233530708 0.9370949826005499  
0.5248589915796228 0.2583585801193061 0.5686555670580075  
0.3752439475764520 0.5265274602139199 0.0718877991682424  
0.0168417396262363 0.0254824590922875 0.1316722647453292  
0.8739027009804108 0.7717836713935852 0.6343616864100180  
0.8716751963947607 0.5309993632916570 0.6392448037970447  
0.0225559529906988 0.2688903520322771 0.1393935048869105  
0.3660541211382605 0.7669560010016492 0.0693555910897649  
0.5140337870061302 0.0276392877574349 0.5643405150870744  
0.4509767666804755 0.2406335774029781 0.4054305077648807  
0.4506961654512714 0.5632677157070516 0.9182317700452092  
0.9526374433192364 0.0601757153773666 0.2989159059270506  
0.9341083855653795 0.7370420728459792 0.8050240814453792  
0.9281136408018097 0.5676322340642097 0.8125252027201788  
0.9658414110352798 0.2351366898245371 0.3129420183860949  
0.4392803086949757 0.7527401485214122 0.9055663847417937  
0.4534660191381351 0.0648014723333718 0.3967778003655967  
0.4985472770267819 0.1423696274847309 0.6623257530643766  
0.3868345631216343 0.6482478959774766 0.1537118078610582  
0.9990219912968651 0.1490782663096829 0.0619335440742867  
0.8965850518636160 0.6502030898031453 0.5621724242719857  
0.4044600193497694 0.2366513852491738 0.6388591447780748  
0.4908427161369449 0.5651056794639782 0.1456815429697532  
0.8967037319243982 0.0656233428183016 0.0827045999532625  
0.9963852859195725 0.7383215042913097 0.5834307375477658  
0.9960689039467469 0.5636082331795431 0.5926164200130558  
0.8986635763713992 0.235070777248703 0.0930480147875876  
0.4875541694295304 0.7335187158910847 0.1340343333822950  
0.3925232067478762 0.0704584582345301 0.6104024676734783  
0.2953143217506513 0.1606400119311069 0.6294669324302096  
0.5921436400723721 0.6500374900349215 0.1266446646551333  
0.7953959755493045 0.1518701898537458 0.0707520880590428  
0.0964351634221428 0.6502827802061327 0.5731762575691191  
0.2981646153982502 0.2787291272119207 0.5391198918652741  
0.5977567333506346 0.5270099399417414 0.0451217322945992  
0.7793167177252724 0.0301104356086936 0.1518129306798002  
0.11498078755212729 0.7718703540271877 0.6502487662612847  
0.1153901808550203 0.5280624952609660 0.6523482254453123  
0.7794965017593206 0.2721371853389041 0.1547712563356190  
0.5952659411973372 0.7690115929657029 0.0350286059864993  
0.2733740598342387 0.0387776619489550 0.5477616699383016  
0.3249030074659079 0.2543146849594115 0.3469214584205505  
0.5736734204095908 0.5549213851171373 0.8495046673218984  
0.8245464195494763 0.0610575809252133 0.3373390001063432  
0.0640068836089058 0.7433891866034829 0.8326699266292934  
0.0587432268749264 0.5604086176040732 0.8275536367311048  
0.8345506161735856 0.2419692912880862 0.3321062718370553  
0.5766712919546835 0.7532366779333102 0.8346781000764145  
0.3243781258663360 0.06082335091326664 0.3639808887240633  
0.3979788065114074 0.1537878871558216 0.2747999451410419  
0.4940614934907546 0.6464434448256061 0.7716809178261269  
0.9024106045722231 0.1486294057559374 0.4297145376844272  
0.9925637706201219 0.6517393967687544 0.9311723953863227  
0.5684384106711031 0.5809577575877100 0.5830700293088847  
0.4085075426677222 0.6480259182130425 0.6046749161582240  
0.2632487073424708 0.6774436898505961 0.5262579320198143  
0.5888088757500088 0.7058783497365292 0.6330494990847109  
0.2152639912160510 0.6426486375057469 0.3273418293948542  
0.3308852263824270 0.5726225956480380 0.4872416379635016  
0.6217885227689880 0.4720894300306283 0.3014027880766376  
0.2699442915436017 0.3387923568183411 0.8005461952209564  
0.1233941363808066 0.8266471618508199 0.4000921282987565  
0.7718748235447194 0.9754153367100128 0.8991659192886865  
0.7727665558386033 0.3290547333005183 0.9037627973732056  
0.1219179418828053 0.4750977685468405 0.4026227496444962  
0.2749915211755488 0.9808898849927883 0.7962206669505468  
0.6246558495715804 0.8299513025214946 0.2888898002035448  
0.5187816650645869 0.4355822410613268 0.4572970373064620  
0.3769222215127491 0.3661743443012263 0.9509186199653881  
0.0229078401697227 0.8640032797511290 0.2468702732182851  
0.8731353161015436 0.9354726630671630 0.7458782758987883  
0.8732947406255778 0.3656869928084371 0.7494673266530167  
0.0219833049351544 0.4353704979547726 0.2485462078055696  
0.3677484338706650 0.9330009665913652 0.9547605850335339  
0.5225092356014353 0.8677642985130232 0.4419832786241936  
0.4674469807518025 0.4463062002341120 0.6746456679377254  
0.4323683239453284 0.3503577318017583 0.1631283143924399  
0.9720441559845331 0.8535555542956554 0.0295881835237721  
0.9221385033685586 0.9466568963790589 0.5280223021801986  
0.9245768933220310 0.3507017879782501 0.5324926716208067  
0.9714028716499553 0.4487577928046237 0.0313440364404088  
0.4179152713102354 0.9517468788817530 0.1715138300457528  
0.4666221773585211 0.8439100481452473 0.6534371809785021  
0.3148557841145863 0.4534306250336610 0.6482091239004758  
0.5836393993168585 0.3494184020352353 0.1541264017243989  
0.8186076892441831 0.8519653418025023 0.0414207040736548

0.0764669319987850 0.9498195604130740 0.5432826720200163  
0.0795198127257441 0.3504799798027275 0.5466995228048528  
0.8172636145331746 0.4515129727325267 0.0493132959297817  
0.5733642811746629 0.9542175311630589 0.1518694730261345  
0.3159662194575671 0.8565172410027395 0.6540651944764607  
0.2613869672315223 0.4297563477709443 0.4280639988087915  
0.6315672320891617 0.3668130105289708 0.9369964721735642  
0.7710626675110953 0.8617967743747179 0.2639931661030295  
0.1274970824708946 0.9376680056862982 0.7669332674167065  
0.1228997503507413 0.3641618754983955 0.7719464317973813  
0.7693966437250189 0.4370913496188940 0.2738077864003337  
0.6268418742431094 0.9390004721460122 0.9261532137861257  
0.2647678767596365 0.8677376159970666 0.4390211403917005  
0.3989332188888928 0.4679776854909937 0.3230559140078028  
0.4980786210033731 0.3237928925602044 0.8273476049239494  
0.9016674548090696 0.8225911466371529 0.3737565231008589  
0.9950195186246565 0.9761929589324650 0.8739387109928738  
0.9929636901250406 0.3239494402079079 0.8791639443351180  
0.9016057322104124 0.4748500464954769 0.3796516722474287  
0.4903756729809768 0.9591043210125897 0.8176967794410395  
0.3948177272271040 0.8295104532696879 0.3253446342112560  
0.6262776754860951 0.2284370633269643 0.2916698625674322  
0.1170401475095136 0.0725341337849279 0.4060890131715487  
0.7748578809233996 0.7286930630636317 0.9106367248425365  
0.7734163067981047 0.5729293234382352 0.9162665473187919  
0.1239753052658869 0.2265004141180252 0.4138461453368469  
0.2721588099807767 0.7290673750980339 0.7867863556908644  
0.6208952716810822 0.0714243422564696 0.2924476257287653  
0.5188895475970943 0.2743038841508731 0.4489127043954091  
0.3818952265134262 0.5231878807225772 0.9492866041399310  
0.0167319409115914 0.0205096539792040 0.2541718074680903  
0.8722963480082476 0.7785180150186434 0.7566442582197777  
0.8700382600143932 0.5226238883773416 0.7613407179445456  
0.0257127149498495 0.2779460047838084 0.2612250624273703  
0.3681644769764512 0.7759732259355591 0.9473851244528526  
0.5171127512845327 0.0250450002310443 0.4418696078856226  
0.4826000311205816 0.2224162592124821 0.6586597534724400  
0.4110674156567887 0.5707537771797725 0.1594338998737176  
0.9745592499028591 0.0715429989093768 0.0528939604414297  
0.9185958214912863 0.7285150704265037 0.5550201688893358  
0.9188807047801949 0.5717955228240633 0.5601555556910622  
0.9762537014364792 0.2274175203394966 0.0603023972868515  
0.4082197407877410 0.7268392728663822 0.1543587122421596  
0.4690960138429455 0.0669252938169392 0.6479072553392823  
0.3241369035911435 0.2371414578896507 0.6370217654038064  
0.5702686397633949 0.5715187663197474 0.1396591384198153  
0.8176676091225362 0.0730593717068827 0.0647547002815856  
0.0753828261283012 0.7290963906517570 0.5640772840330487  
0.0749392250505532 0.5711769174343569 0.5684328518328686  
0.8198079042497062 0.2300924337543998 0.0687595299531576  
0.5675512155400488 0.7284559696360476 0.1323849570757321  
0.3139295219354069 0.0808117981309777 0.6331028164076278  
0.2674059161234765 0.2772178439344199 0.4254255447362794  
0.6259073861708605 0.5233759519490579 0.9300017357218137  
0.769206099634564 0.0202034143214431 0.2731715659058149  
0.1245420504472842 0.7786968944183608 0.7723154753958924  
0.1216100980973659 0.5223039170606180 0.7759360704362176  
0.7726436561559290 0.2784839659037343 0.2771913415430355  
0.6262358594568466 0.7792176112956546 0.9223526744387904  
0.2641825406530258 0.0268389055001637 0.4267287620509204  
0.3987582353208278 0.2318524263757635 0.3119585235807942  
0.4972262238905677 0.5705719665996545 0.8191138528089142  
0.8975007904795356 0.0719502080158036 0.3866959136458029  
0.9934446586070231 0.7283744133838022 0.8875598691216974  
0.9910926284200305 0.5745829512136800 0.8890001261410683  
0.9037940768164963 0.2262759320561852 0.3901867893919838  
0.3957382346066880 0.0758874330121995 0.3128217204878022

Structure TS reaction 10→31 S=10/2  
1.0000000000000000  
20.1473052208878016 0.0000000000000000 0.0000000000000000  
0.0000000000000000 19.7681594983396991 0.0000000000000000  
0.0000000000000000 0.0000000000000000 13.2309279702280005  
Al C Fe H O Si  
2 1 2 10 198 94  
Selective dynamics  
Direct  
0.2722042079535711 0.5726632205731619 0.7893062183819310 F F F  
0.4939538760340056 0.7324403877328081 0.8083574019694595 F F F  
0.5045534656673567 0.6774896825336967 0.4550213285764002 T T T  
0.3232947182491728 0.6224263647022994 0.5886169228964491 T T T  
0.4955076887745236 0.6699530220917040 0.6054404365754351 T T T  
0.5543360391217362 0.5348657377078538 0.5965523232974945 T T T  
0.2048334709155952 0.6756732684054612 0.5652137471901426 T T T  
0.2469828903747384 0.6566685280863709 0.4585769775748645 T T T  
0.5991743361520463 0.7311978465700051 0.7000879058269192 T T T  
0.6199410310937239 0.6644292084557222 0.6437750202674906 T T T  
0.2398284463314084 0.5756898378238375 0.3746293017346858 T T T  
0.5851597503523465 0.5806192649315491 0.5144940942005505 T T T  
0.5525353951983263 0.7020834119904151 0.4411494411215884 T T T  
0.4624825539657493 0.7076866913069040 0.4289638513503320 T T T  
0.5009425125319140 0.6261286379609103 0.4242578762329785 T T T

0.7018553373278777 0.4720676141497222 0.3139214935302448 F F F  
0.1919274876856463 0.3339545033230422 0.8162503217744899 F F F  
0.2026386953421735 0.8247470207119747 0.3941535215383070 F F F  
0.6919983697894665 0.9812530858104367 0.8910890514444247 F F F  
0.6937343161665552 0.3222233490604651 0.891379829641601 F F F  
0.2031210487230624 0.4812984241028815 0.3922305425830359 F F F  
0.1963202936875703 0.9717529359231207 0.8071377677009579 F F F  
0.7046431952888383 0.8257847203979054 0.3058749872743576 F F F  
0.5876464256491900 0.4688837157570092 0.4130222379499600 F F F  
0.3062093390744778 0.3421026974006125 0.9096964377840067 F F F  
0.0930906372635576 0.8353432861139964 0.2877439918316753 F F F  
0.8050950503860577 0.9705088886542015 0.7876658674734784 F F F  
0.8048727528736563 0.3339007743949480 0.7899759932639228 F F F  
0.09138867243026019 0.4681465692567244 0.2905196080119268 F F F  
0.3108936459593821 0.9806843887266155 0.9070568419548977 F F F  
0.5917196091784831 0.8398166764896189 0.3991155305509935 F F F  
0.5996293044782703 0.5407375750933241 0.2451141759907784 F F F  
0.2968331420416206 0.2748226070119060 0.7360053931890675 F F F  
0.0932194318901409 0.7598567342678351 0.4539908850376690 F F F  
0.7991067431484637 0.0443025546387759 0.9543731887510560 F F F  
0.8033380166150863 0.2610762286112589 0.9584044212145386 F F F  
0.0940067899822878 0.5439724508853345 0.4555934472860983 F F F  
0.2917821640034148 0.0536734213936541 0.7440693303732715 F F F  
0.5985450411235362 0.7623681049581137 0.2351442854663688 F F F  
0.5982530669822594 0.4045638770565176 0.2397563306254042 F F F  
0.2878407089033459 0.4106372374847709 0.7409800483950733 F F F  
0.1013515159454670 0.8938047398742412 0.4676073817570625 F F F  
0.7932905327658872 0.9096016236191531 0.9637089237285110 F F F  
0.7920887966914805 0.3951764585816733 0.9680627852561017 F F F  
0.1034304841835265 0.4099105873703266 0.4709700460789961 F F F  
0.3081994418416940 0.9210638107880840 0.7287346815085982 F F F  
0.6096722835550494 0.8965014934339735 0.2175220174616044 F F F  
0.5208404322999414 0.4506495626820737 0.5792096495228520 F F F  
0.3791309281501825 0.3578610009973460 0.0721129140813161 F F F  
0.0218474199059884 0.8613289944464952 0.1255157601295167 F F F  
0.8719465530502362 0.9381082235283600 0.6239049170972422 F F F  
0.8749072193121208 0.3627257604546443 0.6270442190834515 F F F  
0.0223741000279887 0.4394895621403236 0.1267742119727373 F F F  
0.3693081025740597 0.9444933922883294 0.0759005786332665 F F F  
0.5192700097831562 0.8614957744725729 0.5618151456491915 F F F  
0.5155432872193373 0.3551152272041520 0.4344940917271671 F F F  
0.3947422047837392 0.4437636734680410 0.9167731110312403 F F F  
0.0118416050082928 0.9418664854306726 0.2875379509366027 F F F  
0.8781838599068408 0.8582454606384857 0.7872953769659077 F F F  
0.8809238812365834 0.4433650280698913 0.7901104113179187 F F F  
0.0168590226604195 0.3576000528163945 0.2887461731163370 F F F  
0.3532548403567191 0.8559308253732141 0.9237003326924196 F F F  
0.5135083456345697 0.9479743082592478 0.4046230835445428 F F F  
0.4557340247346531 0.4740490884415820 0.4108918336244471 F F F  
0.4349572787107192 0.3180021630425784 0.8994140130794008 F F F  
0.9630176041918119 0.8191797189670353 0.2953163717884948 F F F  
0.9378991437795179 0.9761478789550893 0.7883113461445816 F F F  
0.9359246369858667 0.3227924367266297 0.7943444406600122 F F F  
0.9598639420309709 0.4772108342406725 0.2942402048737378 F F F  
0.4426667925049728 0.9542220386854581 0.91403864211495847 F F F  
0.4618794993486830 0.8261813012489085 0.38983197508833559 F F F  
0.4738817918102711 0.5185814621138576 0.7310507094232435 F F F  
0.4240912881990369 0.2765463040314913 0.2148327701388482 F F F  
0.9811122504868095 0.7790276230689912 0.9828510777964681 F F F  
0.9090815377554335 0.0211739180192154 0.4796817942328744 F F F  
0.9116997801029072 0.2758559878048388 0.4871046889867543 F F F  
0.9835062657312932 0.5234393728800271 0.9839420922064122 F F F  
0.4098251058720166 0.0276595857282729 0.2174375967513669 F F F  
0.4750205674774719 0.7638539319640785 0.6843380949941107 F F F  
0.3933739462813577 0.4370175338175954 0.6272650313609063 F F F  
0.5076851129152686 0.3544877429823146 0.1148298038160434 F F F  
0.8957794964680659 0.8645100053267782 0.0705267064651238 F F F  
0.9977702776908828 0.9399607820990923 0.5690300622489630 F F F  
0.0008756160553460 0.3591917129624775 0.5698002194675809 F F F  
0.8963498375482430 0.4393317161990780 0.0722358053069669 F F F  
0.4944373252078265 0.9371788281565330 0.1416524825684107 F F F  
0.3915428955731315 0.8575089682675809 0.6093960799717664 F F F  
0.4881936480301192 0.3846605695768517 0.7440966269616851 F F F  
0.4249396165859380 0.4097453832360998 0.2441763826103696 F F F  
0.9890899300659726 0.9101799767634162 0.9459125590153832 F F F  
0.9060106015812579 0.8892375829012451 0.4451505291791023 F F F  
0.9075644360793547 0.4069393077420642 0.4460900333543876 F F F  
0.9887675621387046 0.3915206074437165 0.9478395144504148 F F F  
0.3930307815288998 0.8968863722637295 0.2558312615500000 F F F  
0.4813754009962778 0.8880565679311232 0.7500243170833443 F F F  
0.3056021422236199 0.5348105037782105 0.6760713258570306 F F F  
0.5988915276288154 0.2739656446323124 0.1975219482275108 F F F  
0.8096062662711603 0.7773071615628240 0.9938302385665381 F F F  
0.0870408611692923 0.0255177216177103 0.49543953969694709 F F F  
0.0936842519290053 0.2765033146110412 0.4974262757917103 F F F  
0.8084530431800374 0.5266913957681183 0.0010527020976809 F F F  
0.5826542642038817 0.0275950434745411 0.2061478354995998 F F F  
0.3041320100463807 0.7862757723873628 0.7140440949207161 F F F  
0.2721856196517791 0.4359291909264655 0.5484057517240970 F F F  
0.6330899467556108 0.3625910546481421 0.0578627372239993 F F F  
0.7725139082136181 0.8579038917459911 0.1423735638863945 F F F  
0.1197182322031622 0.9459956161708050 0.6477312761225136 F F F

0.1219199637633821 0.3558750535524595 0.6503913515668032 F F F  
0.7740177186588539 0.4447592737037311 0.1499312481909598 F F F  
0.6074726564119004 0.9573040123631884 0.0413316634140699 F F F  
0.2627993517107328 0.8637715849802277 0.5635349800020890 F F F  
0.3296960247540426 0.4446938689859721 0.3678129133952055 F F F  
0.5644616287169271 0.3378041995806527 0.8912351817194448 F F F  
0.8333160157609427 0.8210540924150109 0.3114865040976298 F F F  
0.0675167125012379 0.9792723625540489 0.8237614375045936 F F F  
0.0646519691062792 0.3194338863192741 0.8232738160589932 F F F  
0.8303828884607185 0.4782774667498302 0.3234290396012653 F F F  
0.5673556415977927 0.9615163931558968 0.8512829834025979 F F F  
0.3317284547070116 0.8317916102017762 0.4019673672168125 F F F  
0.2393214819076732 0.3530731300104222 0.3996215251395583 F F F  
0.6429867907082567 0.4457647877183035 0.9015251978348431 F F F  
0.7749198157754904 0.9404824560917717 0.3014609868513745 F F F  
0.1257307724424166 0.8592941044537667 0.8023216952312779 F F F  
0.1137808490544785 0.4428494425595062 0.8037548042412297 F F F  
0.7713302533023665 0.3588732886051176 0.3060556884807824 F F F  
0.6439202326916273 0.8590192342195593 0.9135120317041299 F F F  
0.2604738242207034 0.9455642272800020 0.4041206617846669 F F F  
0.3926839677374758 0.5396492021229662 0.2668869943910153 F F F  
0.5075214898858889 0.2533866703231169 0.7654588264632736 F F F  
0.9036818953652173 0.7541774268468942 0.4420237632252224 F F F  
0.9854506926222300 0.0455468203836915 0.9401166050627552 F F F  
0.9854466259595611 0.2562973998952884 0.9475755427716379 F F F  
0.9077334141262909 0.5426538835939567 0.4470209663680985 F F F  
0.4723056064093285 0.0237417576871195 0.7528300989877295 F F F  
0.3889841250189221 0.7598271737778077 0.2620872395498921 F F F  
0.703774731880404 0.2442043575933468 0.3147834049554774 F F F  
0.1903052609921332 0.5537838340542578 0.8104655886982002 F F F  
0.1964124018629221 0.0622765486500541 0.3908918226824269 F F F  
0.6941890416289382 0.7358351006468666 0.9118409960865250 F F F  
0.6938881701434170 0.5685938744640708 0.9186672954037931 F F F  
0.2053772103553939 0.2263816561855023 0.4128326161988198 F F F  
0.1920211579759155 0.7426213095810965 0.8018680208598781 F F F  
0.6970691432604141 0.0479735933517773 0.3062174958946215 F F F  
0.5835861163883678 0.2443223109643284 0.3924445828788805 F F F  
0.3194642753691070 0.5540046448341158 0.8927522798029273 F F F  
0.0841691774399180 0.0541408976085407 0.2975249206577431 F F F  
0.8012703837122501 0.7489133674658603 0.7979959468348454 F F F  
0.7991253228872779 0.5493966332207876 0.8027651918335721 F F F  
0.0969513531521926 0.2504437251745983 0.3010997550673054 F F F  
0.3054372897841162 0.7339979902200540 0.8993812842391549 F F F  
0.5849473475007869 0.0609720246262739 0.4020583996540381 F F F  
0.6169847356833742 0.1500025249192802 0.2588122048910648 F F F  
0.2850390612523555 0.6554404594895900 0.7396055479188135 F F F  
0.1003286135874077 0.1502019252865097 0.4366612367562084 F F F  
0.7950629880642879 0.6514394277232540 0.9367517446913354 F F F  
0.5246231757361599 0.2552701253741034 0.5676972495270718 F F F  
0.3751922827911045 0.5267961984331393 0.0700923910957201 F F F  
0.0162994597286144 0.0257204573718894 0.1322260176069960 F F F  
0.8737411892318292 0.7721496438523587 0.6349583153742557 F F F  
0.8742306184374726 0.5294541186606025 0.6391919578394365 F F F  
0.0212898444339231 0.2697875940257504 0.1390264972352426 F F F  
0.3685386618033917 0.7670748843746225 0.0680601483589243 F F F  
0.5137860568964143 0.0282085476118894 0.5641547014313559 F F F  
0.4502391073091943 0.2406084264572854 0.4042196889028205 F F F  
0.4503865186498501 0.5648396479366653 0.9168119310288034 F F F  
0.9529660619363653 0.0613902485763589 0.2997188909294195 F F F  
0.9331319113202809 0.7371055736489964 0.8061658499277229 F F F  
0.9289685213471728 0.5671621976845387 0.8128753103694280 F F F  
0.9656763635571792 0.2356293878060782 0.3135022271005852 F F F  
0.4374981934567828 0.7523920468034717 0.8992152971145586 F F F  
0.4536850142337414 0.0676253571486498 0.3974042117186514 F F F  
0.4971788348261441 0.1412779051816884 0.6661265542886952 F F F  
0.3865972574229204 0.6481259098656622 0.1535523067161790 F F F  
0.9986234892592663 0.1493556499704667 0.0629088534038331 F F F  
0.8926915675504858 0.6498314932753502 0.5624434610025659 F F F  
0.4043772317421741 0.2367342781325590 0.6401415122819998 F F F  
0.4910905758786299 0.5658673853850473 0.1416727843952046 F F F  
0.8959007522355691 0.0664210096005888 0.0850473176442463 F F F  
0.9950289731069688 0.7339062212864107 0.5836833479417507 F F F  
0.9966941810112502 0.5686094468530456 0.5887124946905544 F F F  
0.8977177703116297 0.2345153825422415 0.0938198265248289 F F F  
0.4883178550263167 0.7324522225734071 0.1371779908888442 F F F  
0.3918280336033817 0.0694163510567662 0.6113595768731699 F F F  
0.2953167368942928 0.1607056824735409 0.6282231791534727 F F F  
0.5935421167571064 0.6498241529861488 0.1292601233894786 F F F  
0.7939874222066408 0.1516897765541643 0.0730198851443618 F F F  
0.1003458705079581 0.6520581809693553 0.5719010354723011 F F F  
0.2994054072410250 0.2782143945469073 0.5363214682534760 F F F  
0.5998121890672152 0.5273690528073445 0.0459485048832278 F F F  
0.7783036340176324 0.0292176205046673 0.1514099008808003 F F F  
0.1116440920531687 0.7741295743069543 0.6508572429873141 F F F  
0.1145945189560962 0.5291067472461535 0.6514008049073610 F F F  
0.7786968208528151 0.2727658641580888 0.1542989725274140 F F F  
0.5942605258004576 0.7675790117075252 0.0342556163367718 F F F  
0.2727721603254949 0.0385223331500271 0.5479928992623684 F F F  
0.324971799550512 0.2566075935380496 0.3431014073849781 F F F  
0.5738525383190662 0.5540257455707405 0.8505926402093138 F F F  
0.8243818378335064 0.0622563914921983 0.3354649363123059 F F F  
0.0631879547845102 0.7431175933841061 0.8331156785662870 F F F

0.0596001375901025 0.5623486530004129 0.8272595907750144 F F F  
0.8342644513150930 0.2424008699739204 0.3311654592255096 F F F  
0.5759106385735464 0.7559092732235229 0.8334776217406983 F F F  
0.324677764705584 0.0598700313060405 0.3647352527396066 F F F  
0.3962162203463677 0.1539315339925906 0.2740000772946303 F F F  
0.4962288821138685 0.6463759632002706 0.7695740886772384 F F F  
0.9017284064798403 0.1491196098223284 0.4299360245378168 F F F  
0.9919923063376288 0.6519095269509023 0.9322724825764581 F F F  
0.5706409056757522 0.5814100701131082 0.5848754247104893 T T T  
0.4156204417910061 0.6400466400622093 0.5925898430127674 T T T  
0.2483104752680418 0.6807113370012559 0.5334914714031882 T T T  
0.5949107804746490 0.7064494995008062 0.6350213446951756 T T T  
0.2653192296116842 0.6180575866101776 0.3765296095725290 T T T  
0.3259053855453971 0.5842750336275202 0.4694112715582861 T T T  
0.6221064968285646 0.4712520287382702 0.3006782917365314 F F F  
0.2709886363799185 0.3401047614129098 0.7992342306636857 F F F  
0.1226512201057943 0.8282485586145256 0.4016683501037335 F F F  
0.7719727074265634 0.9760631694241653 0.8996993962036299 F F F  
0.7737442670345089 0.3280214303645437 0.9030300428742208 F F F  
0.1224505822746238 0.4752960940139772 0.4033320749791400 F F F  
0.2757770984495096 0.9810693924553959 0.7964469185879253 F F F  
0.6253793399984318 0.8312422766492844 0.2878703889034497 F F F  
0.5194194917672164 0.4351687097491208 0.4574104236500389 F F F  
0.3785593995047165 0.3663154213792978 0.9501289952107825 F F F  
0.0223683202000302 0.8645345575823384 0.2476655277207200 F F F  
0.8732722637592971 0.9358897474887513 0.7462864788651515 F F F  
0.8743347699817292 0.3658378348035711 0.7492903067408037 F F F  
0.0224638439564160 0.4353755659365746 0.2488728951649080 F F F  
0.3691934898129290 0.9333279863246844 0.95488098585892712 F F F  
0.5214879117350435 0.8694724396037614 0.4398098655971125 F F F  
0.4673232330126638 0.4470306084549875 0.6732742490914134 F F F  
0.4330634322809956 0.3499397329934908 0.1621473926894481 F F F  
0.9716449297776677 0.8538112999457041 0.0302564264156260 F F F  
0.9217147341129888 0.9471143933271264 0.5282877646220072 F F F  
0.9244041178899991 0.3510783807133535 0.5317576145509264 F F F  
0.9723866757020829 0.4487601324109391 0.0313839320097529 F F F  
0.4175115585358284 0.9516267392033200 0.1729695168333620 F F F  
0.4663975706787156 0.8428008277660055 0.6505110105556327 F F F  
0.3152378758006691 0.4551868090818942 0.6469173446900953 F F F  
0.5842032700174613 0.3487452956664754 0.1524907771955029 F F F  
0.8180688220604679 0.8523316851313822 0.0419421524358015 F F F  
0.0762277096547379 0.9513417199878589 0.5452592546777879 F F F  
0.0797863353781452 0.3502870920558365 0.5467572972532579 F F F  
0.8180894380652646 0.4513035719599046 0.0477255752771271 F F F  
0.5729911647688724 0.9545850252142216 0.1514445424615545 F F F  
0.3161274050160330 0.8565356993689335 0.6546868987217991 F F F  
0.2622785917421098 0.4298230850116553 0.4276298900176698 F F F  
0.6329426754192653 0.3673531654263513 0.9352425384393683 F F F  
0.7714618427688293 0.8621131395353885 0.2647952345713875 F F F  
0.1272371693498613 0.9385353596004009 0.7693640818082770 F F F  
0.1229548626136960 0.3642563320325465 0.772683803639650 F F F  
0.7697394972618810 0.4377526783043706 0.2720291247985216 F F F  
0.6268922610985115 0.9387521044531937 0.9256789350920371 F F F  
0.2643887490875301 0.8670459062738658 0.4407008783344253 F F F  
0.3999201247387774 0.4676055424624721 0.32242652925972176 F F F  
0.4987156777652615 0.3241520880848441 0.8254782156332681 F F F  
0.9017384011877283 0.8224016294544327 0.3745100622492998 F F F  
0.9948712587972111 0.9767686371443602 0.8750981431323410 F F F  
0.9937875688594389 0.3236884954162420 0.8795065272521256 F F F  
0.901683898793651 0.4751221867653328 0.3787821655192474 F F F  
0.4908558570907360 0.9565250539885852 0.8163416824645680 F F F  
0.3935397863467784 0.8295070127423116 0.3251864134508509 F F F  
0.6261184340635779 0.2284725097543969 0.2909692317528041 F F F  
0.1174435319447440 0.0725763247237836 0.4060687842458108 F F F  
0.7740975721083529 0.7288705254611330 0.9106028636060159 F F F  
0.7740150044276106 0.5736140210983862 0.9148016183333922 F F F  
0.1245841835334929 0.2266862475172005 0.4118496101289253 F F F  
0.2713384586634930 0.7298889007837275 0.7881905887156933 F F F  
0.6208191985367719 0.0713079137412365 0.2925623939278168 F F F  
0.5182927642158148 0.2733946563261540 0.4487657927950011 F F F  
0.3824844824076621 0.5232109777617211 0.9475653031966829 F F F  
0.0163977346227639 0.0208393994715479 0.2547538658674355 F F F  
0.8716635225908291 0.7789208156191663 0.7573131184223598 F F F  
0.8707410815565808 0.5225319834405724 0.7614524409224046 F F F  
0.0254452309871382 0.2780639620938601 0.2609162496009816 F F F  
0.3679790587542087 0.7762542404724542 0.9460351571941814 F F F  
0.5166872299036527 0.0263714528597276 0.4417134749562805 F F F  
0.4824115945823806 0.2214257219535156 0.6594527904934822 F F F  
0.4113679183518002 0.5706862263155372 0.1576151310374456 F F F  
0.9735928930468418 0.0719491810128119 0.0541410256341237 F F F  
0.9168180817675164 0.7275951067067012 0.5554285693343886 F F F  
0.9185262641709855 0.5725099498341137 0.5592055737574526 F F F  
0.9752004466794304 0.2274981272105734 0.0605108181517409 F F F  
0.4087388673206505 0.7265042234597274 0.1545162564812088 F F F  
0.4684072688389307 0.0658576085371720 0.6488480685032840 F F F  
0.3240820529519155 0.2372414280102220 0.6357143792557807 F F F  
0.5705949147382725 0.5714695553976270 0.1397547014883287 F F F  
0.8168943635941872 0.0731342771379460 0.0657152881461514 F F F  
0.0741461270243704 0.7301884209700091 0.564555909949778 F F F  
0.0758242842901851 0.5731269092373026 0.5672588142912005 F F F  
0.8188629414373381 0.2297098714076853 0.0692959417604229 F F F  
0.5682177160559192 0.7280165097572748 0.1334780775820121 F F F



0.3132717121926802 0.0807219873092322 0.6332147318614147 F F F  
0.2678504633199168 0.2777371915651656 0.4231998367969823 F F F  
0.6271144956939665 0.5239503475468723 0.9303313012744567 F F F  
0.7690862235130567 0.0200434013566522 0.2730842999968033 F F F  
0.1231073546277912 0.7796833015594160 0.7728532400295052 F F F  
0.1214244618872726 0.5226813733742617 0.7751456316330305 F F F  
0.7722505338811274 0.2792195488933373 0.2767903048054023 F F F  
0.6257877497684134 0.7791001386320957 0.9223597306757583 F F F  
0.2642450640888185 0.0260801124135668 0.4270677755765675 F F F  
0.3986576699995439 0.2321801342363585 0.3098940900635014 F F F  
0.4978972652832283 0.5711418077968347 0.8184806637765476 F F F  
0.8969521837932461 0.0725689591606908 0.3863353908817189 F F F  
0.9927322368964937 0.7285014466431718 0.8883233501694505 F F F  
0.9918285661256121 0.5749370553804951 0.8892831934363770 F F F  
0.9031975129409417 0.2266730521301454 0.3900276694197089 F F F  
0.3956498783326339 0.0763258180239745 0.3132928836877724 F F F

Structure 32 S=8/2

1.0000000000000000  
20.1473052208877697 0.0000000000000000 0.0000000000000000  
0.0000000000000000 19.7681594983396742 0.0000000000000000  
0.0000000000000000 0.0000000000000000 13.2309279702280254

Al C Fe H O Si

2 1 2 10 198 94

Direct

0.2717914265470748 0.5732057483743531 0.7888845180830577  
0.4941268399167987 0.7358848920283116 0.8130317826324656  
0.4857999183084554 0.6888928163589622 0.4777048502598063  
0.3232415106245917 0.6259601885681267 0.5929050948529901  
0.4950344184668397 0.6630877085922890 0.6215006954172461  
0.5367824010536855 0.5500543034510030 0.5793788425137404  
0.2091363106350797 0.6622505853442648 0.5912600876038836  
0.2299003874593535 0.6475438208916108 0.4074193346855581  
0.6057727879262327 0.7310856151091079 0.7093183932099058  
0.6246581132902048 0.6707789860923206 0.6363501314265422  
0.2243571336566713 0.5819332643282411 0.3421519469459841  
0.3093536532065103 0.6023475395419472 0.4193472555562848  
0.5353141730282760 0.7080679509869218 0.4590023805608842  
0.4466340018291748 0.7269492210161680 0.478465343338974  
0.4716156390373955 0.6426804017028328 0.4378310015427345  
0.7009220320108523 0.4712346174010803 0.3125387786575534  
0.1925338909727456 0.3299416383806834 0.8124103956580474  
0.2043007100924668 0.8250722872049691 0.3932296978578299  
0.6920046014955087 0.9808917808351342 0.8899319808001782  
0.6932754696933972 0.3224546987588374 0.8903484142522532  
0.2025064307639710 0.4807175784167707 0.3891319544826141  
0.1978086316683043 0.9700110028022814 0.8058147462200672  
0.7052387226328410 0.8241812461933129 0.3024566489777795  
0.5886281891542663 0.4630916240604603 0.4155435085987831  
0.3058751328938129 0.3429539952811768 0.9082709540671727  
0.0943727040330221 0.8337422346535489 0.2865358082007776  
0.8054115991385293 0.9709629609311182 0.7865886788842196  
0.8043063255326875 0.3339012284101248 0.7886110784565671  
0.0904548172335051 0.4683901524499283 0.2892454740435940  
0.3127607532577075 0.9835899722369531 0.9042071486463503  
0.5934884213742951 0.8416989027166206 0.3983318788436827  
0.5955182550115024 0.5374138947059334 0.2485872227127838  
0.3009585774099724 0.2756594499398162 0.7350585389221036  
0.0974880874772314 0.7563503747498198 0.4516134074972246  
0.7978612737934124 0.0455103936034326 0.9530321560893746  
0.8031108859657008 0.2612442246030869 0.9570404036809421  
0.0941252990595822 0.5425080478495977 0.4559580748834405  
0.2899885364492647 0.0552501035113035 0.7417560630167901  
0.5968586527742629 0.7607171286497434 0.2385631946730571  
0.5980554240790579 0.4015716618018764 0.2409555058491589  
0.2854410086021503 0.4109185417068714 0.7390064394233177  
0.1003295307882399 0.8904956214593919 0.4673862792696087  
0.7950765956964135 0.9108810360012410 0.9627141810061238  
0.7919550087550631 0.3954994588916365 0.9662235443063607  
0.1034961991320845 0.4077615204996275 0.4673710428463103  
0.3111767268540441 0.9230056527876777 0.7264414610741367  
0.6098664859917310 0.8942139668422688 0.2136529439552255  
0.5183743026660877 0.4583020526002912 0.5809140326312389  
0.3791647731058347 0.3559673601728732 0.0704298355440467  
0.0225814188781580 0.8596358863037096 0.1249426960411174  
0.8730370976594348 0.9381354231555408 0.6236829870203996  
0.8752160360840867 0.3612047190063895 0.6263793340861611  
0.0216455450087548 0.4400652608364900 0.1259577984155227  
0.3691753603838978 0.9488022581804409 0.0752033681202783  
0.5196855078183141 0.8578752236211724 0.5601283617132831  
0.5126054749834273 0.3540591058286885 0.4513062377235527  
0.3945208161962317 0.4440078977252568 0.9181204674212150  
0.0140251637756161 0.9411598432154982 0.2859360677365295  
0.8776965107038409 0.8578179756350877 0.7862825396582090  
0.8808376414920216 0.4432500427089463 0.7878295345046749  
0.0163736751792776 0.3572967582282111 0.2869582514551193  
0.3457177046574989 0.8570625196881130 0.9296218921200500  
0.5137850799183925 0.9488573430580381 0.4084505021498548  
0.4566571368910572 0.4720789304803443 0.4089052023412384  
0.4348540258343842 0.3186577442183459 0.8959796808728322  
0.9643234492784987 0.8186318955958037 0.2959673383159155  
0.938256108800175 0.9753356404545214 0.7890006185378738

0.9352257791382842 0.3224207292834724 0.7954254318181929  
0.9591064368220931 0.4769082836944090 0.2940922742673767  
0.4427041756577107 0.9476432971504390 0.9136380209020780  
0.4638469202790242 0.8278948905603801 0.3843176040421935  
0.4704484710482530 0.5198247774055348 0.7404135442263917  
0.4244825583201821 0.2763310995415846 0.2146917219282220  
0.9820113649364365 0.7784524565544266 0.9807766018810599  
0.9102368745316698 0.0208887558570354 0.4792728578002253  
0.9126459715803686 0.2751349257848822 0.4856650141935799  
0.9807789238528533 0.5240230985083778 0.98406639039703019  
0.4126573265595396 0.0272432555059669 0.2197885218387316  
0.4746264027249168 0.7604526138676241 0.6851220768760906  
0.3921980197428505 0.4404113264625957 0.6293033499923907  
0.5076901560848177 0.3541657992324221 0.1136187547112384  
0.8967217498116772 0.8638274952040091 0.0692441588837784  
0.9991799665881950 0.9408636085786458 0.5696497821549372  
0.0010830477030794 0.3589701652876374 0.5692297539331532  
0.8954914428073983 0.4384543733888511 0.0726623453947533  
0.4943754493926164 0.9358524422905260 0.1408161629697683  
0.3926161364584629 0.8552457081437945 0.6082553846854132  
0.4879529185175822 0.3860903459966473 0.7408974253202082  
0.4236005727000378 0.4094771150119346 0.2416799468616981  
0.9907629670683668 0.9096398140518334 0.9457693238967299  
0.9080892854414113 0.8887546992523151 0.4458449797511649  
0.9075444348632009 0.4063856403635756 0.4458908879241664  
0.9883350214384311 0.3924062379914505 0.9470298428719450  
0.3913286764093214 0.8960990082457864 0.2519145609243876  
0.4830920708718949 0.8838935212844188 0.7488811609245837  
0.3007975077145530 0.5352294638028096 0.6738106304765294  
0.6004659832534351 0.2723621898326961 0.1899837852055617  
0.8095857429142826 0.7780436620406630 0.9924376773155900  
0.0901389550311886 0.0232319829784378 0.4927677648502690  
0.0942099101810116 0.2751869640603055 0.5009671036645970  
0.8077060013288346 0.5266675509580426 0.0035051730079935  
0.5815141001631928 0.0256341094284357 0.2100739523438200  
0.3039543588072171 0.7878853265887759 0.7146863138777648  
0.2720187835466589 0.4362996238020331 0.5456685297117644  
0.6328706808425346 0.3647936662673257 0.0561562300610058  
0.7731992780313867 0.8593400088123871 0.1406802590332828  
0.1220651284091853 0.9440734283090855 0.6455020608329151  
0.1223727595635873 0.3591492572704233 0.6491966770728802  
0.7730533476669259 0.4423222507787198 0.1496861718608989  
0.6070748806204760 0.9605981347437034 0.0414078421894748  
0.2639482051269494 0.8641791003836646 0.5628972697781075  
0.3293634963216645 0.4476453252570088 0.3668921659782303  
0.5640504027670387 0.3404177165061165 0.8895336408395967  
0.8343781710702720 0.8241333920217410 0.3095842786672698  
0.0684789200297562 0.9768044921701646 0.8204847687820495  
0.0644771316949136 0.3227183669163025 0.8205927151898893  
0.8295636088017835 0.4763499552737408 0.3225680234268077  
0.5673719006755282 0.9584645649539735 0.8512164297298833  
0.3334597802139314 0.8323445225544874 0.4023144419072287  
0.2406716044745498 0.3528899315074372 0.3960162571061616  
0.6445633821166492 0.4470316094669863 0.9002844339034923  
0.7714523179210245 0.9412641404407237 0.3005768456575759  
0.1282599989613588 0.8573960611430017 0.8002045411445721  
0.1251415505056819 0.4435552986131554 0.8063010082642954  
0.7696288150336618 0.3573033022228561 0.3068177710576215  
0.6459185129834155 0.8591920260353032 0.9216571010036446  
0.2615704996343420 0.9461493181030950 0.4037278430717581  
0.3932150489059701 0.5401499919353964 0.2681094695205608  
0.5093475575703680 0.2554745102834762 0.7625280018523261  
0.9015411865059125 0.7538210238571790 0.4398920403472378  
0.9888873267576733 0.0450728371628119 0.9380255266893485  
0.9890684353461381 0.2568949433052074 0.9465506493697183  
0.9056904744627832 0.5421245473309141 0.4463564523731757  
0.4701182946497759 0.0188198905769138 0.7532932918205147  
0.3892592534912079 0.7589183505358357 0.2628161291789187  
0.7038256127065714 0.2410677670828427 0.3097544912465994  
0.1887380821498802 0.5606871627113363 0.8100258233980919  
0.1972820625884517 0.0622325657937236 0.3854245457658922  
0.6947078867472991 0.7356791065220069 0.9105453949445469  
0.6936057744964054 0.5701098335690755 0.9216908680731458  
0.2057263060014118 0.2266345419408693 0.4145053401789483  
0.1929852416118023 0.7397365212052580 0.7998547954775019  
0.6973157284127985 0.0514678538024744 0.3030817533905656  
0.5836577184614958 0.2499458616854196 0.3864537265919724  
0.318745050343268 0.5530648855440706 0.8916497133467634  
0.0833636854988590 0.0553228450892907 0.2964723158023138  
0.8021020492582790 0.7477562299818818 0.7971575759215597  
0.7981554195904113 0.5484020213979234 0.8050078413723997  
0.0967691830680131 0.2506882469214389 0.3039548925031265  
0.3063020066825946 0.7329660875921115 0.8988791959451944  
0.5865343942910208 0.0608282466207734 0.4046121833965413  
0.6125851661315272 0.1498641606388169 0.2590205626212984  
0.2883099584370199 0.6559103890905686 0.7375667141020954  
0.1015619160050472 0.1493090376192837 0.4378568095682274  
0.7958435258900943 0.6515023039455776 0.9374622900724403  
0.5288113842752595 0.2444494041428778 0.5647686946682293  
0.3712695896652796 0.5263575671053762 0.0721246148303875  
0.0170803858915418 0.0253626442364081 0.1307487746325246  
0.8738281182906398 0.7717332286789266 0.6334200574014157

0.8711923076052686 0.5307816195433385 0.6386669292513018  
0.0235408732975329 0.2684498884763500 0.1387294452443943  
0.3672459486646408 0.7663688884794549 0.0694790084153419  
0.5150848445463394 0.0301331576421653 0.5670252366745462  
0.4508032278018144 0.2407081049606893 0.4040267870964100  
0.4490020586393580 0.5656789578150920 0.9245062135307086  
0.9520385261271324 0.0592610879558736 0.2974227915325973  
0.9342735580114782 0.7373266347255205 0.8035112836168389  
0.9279078468169187 0.5672565952201865 0.8112866497147482  
0.9653397716706714 0.2352248726643789 0.3111958989569917  
0.4369192196473877 0.7603716115486551 0.9003135344395464  
0.4550808492514310 0.0688208624072194 0.3996239667203295  
0.4935002176777931 0.1393133013780815 0.6779793789966534  
0.3867597847723981 0.6475344105241818 0.1542683793660346  
0.9989128046751384 0.1490547434454963 0.0608646993154956  
0.8973752098551120 0.6498543929430247 0.5620314624231284  
0.4071082022920514 0.2384459195065351 0.6351808811110038  
0.4898411869237229 0.5628496770308976 0.1384403051106500  
0.8970243324848183 0.0647550562324929 0.0801876689164428  
0.9959399808590148 0.7392656448973146 0.5785027647260058  
0.9957030347540454 0.5617138838742919 0.5889014740801901  
0.8994851961859596 0.2364242744175663 0.0903312758507840  
0.4880090788809792 0.7322153778105777 0.1355387335088401  
0.3914732538190990 0.0669239736437022 0.6108647954407929  
0.2981089730003015 0.1620583864401976 0.6259993772898854  
0.5917631234982443 0.6475315581397456 0.1337676798738670  
0.7966328327717848 0.1522173317920490 0.0728984722702474  
0.0956606975586217 0.6500646860043703 0.5736548546533736  
0.3002501097410873 0.2800114466673402 0.5355664752811348  
0.6015198187886441 0.5255091827501650 0.0497393160956413  
0.7799557389652658 0.0297847466797450 0.1507963738276586  
0.1137258106548811 0.7721866280916310 0.6486975313743080  
0.1149476428117812 0.5277964124841784 0.6519261817540725  
0.7807118158046212 0.2734937208602912 0.1531650053713028  
0.5969149710703183 0.7649071152714765 0.0381514195669837  
0.2714461568243506 0.0408214534362281 0.5459139561903102  
0.3253601556275088 0.2550613754615866 0.3428814154890758  
0.5726961797993787 0.5545610711152321 0.8569370339311534  
0.8241710065338649 0.0614671571966067 0.3365684661503273  
0.0641919347514008 0.7421074530741728 0.8311430342032368  
0.0581322061525875 0.5588282077154743 0.8272519885013240  
0.8339293332626708 0.2413319288093663 0.3310820202435140  
0.5756423921325677 0.7595277571860310 0.8380140315521216  
0.3262572905153586 0.0599490325880151 0.3646571488924956  
0.3977454438931542 0.1536639405554773 0.2735606335990404  
0.4954587614670513 0.6488010860017337 0.7827114408946781  
0.9028825031065745 0.1483502336257843 0.4283820798131615  
0.9923618626073606 0.6514815487251081 0.9296994779151310  
0.5528937951160509 0.5963756606228692 0.5913173425923788  
0.4084743613046154 0.6365773791797490 0.6253255858206576  
0.2457261863144084 0.6617801539629344 0.5428184484736932  
0.5991495634860732 0.7127063779131241 0.6405094620789312  
0.2496726937179590 0.6239300616470776 0.3486806748494975  
0.3444534915889720 0.5917885886769705 0.4741097556238292  
0.6209824608144808 0.4685342557855621 0.3029297206346400  
0.2715046073938894 0.3396569302101533 0.7973583979665673  
0.1240956841716145 0.8263518561738343 0.4003376683049940  
0.7720905361830260 0.9766594451586663 0.8985393672914083  
0.7733195981702499 0.3281654473184504 0.9017586854468171  
0.1219222979956006 0.4741907253775592 0.4019007703272868  
0.2768168545877344 0.9821828057199794 0.7943014709690528  
0.6257701002995384 0.8302223795710411 0.2867642840381703  
0.5192644874927282 0.4351521854185973 0.4622450944436541  
0.3785757651762293 0.3660847489478373 0.9487489800611835  
0.0236175461429057 0.8634833181312523 0.2470138335921425  
0.8735256588305660 0.9356843449163244 0.7460641097949087  
0.8740781935522207 0.3654041055417998 0.7485362708709177  
0.0215458256153391 0.4352800241011673 0.2479534414453015  
0.3678607076433523 0.9339000854748949 0.9551742180292245  
0.5227225316990207 0.8697161111910042 0.4389554477935407  
0.4662507196202374 0.4509786151949273 0.6755691941253741  
0.4331260934937107 0.3492187031289560 0.1605784807267006  
0.9725850219205390 0.8529357126731831 0.0292800991698811  
0.9231012298832550 0.9470797367160088 0.5285278642690173  
0.9246768943594421 0.3502922657981748 0.5309803470601103  
0.9711516438037409 0.4490215409072240 0.0311467843207039  
0.4178316865273387 0.9520244381669766 0.1721709984576165  
0.4673823118067531 0.8392274004934034 0.6491302394635975  
0.3134984130807547 0.4558559748720927 0.6457169605703111  
0.5845045218861706 0.3483047520174367 0.1503128411897204  
0.8188148187736061 0.8529352602188683 0.0405418146628106  
0.0776500500990556 0.9497831605726179 0.5439441835533553  
0.079939892497772 0.3500326278709563 0.5465505841420841  
0.8172142387053940 0.4506102239824055 0.0480319902756201  
0.5728212534853467 0.9539535366846723 0.1514289555784363  
0.3174272323847104 0.8574747114937926 0.6539728906317608  
0.2620438181900666 0.4297803123107315 0.4250306971820412  
0.6330781081488259 0.3687600551212040 0.9335651523729006  
0.7711914871277403 0.8629811149483869 0.2630379047160458  
0.1289426719496942 0.9366724204160043 0.7672024770095840  
0.1249094441070031 0.3651316271787607 0.7717051151217207  
0.7684821821850091 0.4361069878981650 0.2718842983632181

0.6272619167571182 0.9388063587011106 0.9271904679639063  
0.2657513131435921 0.8677509739578744 0.4399395525281630  
0.4006962671897040 0.4670710252264407 0.3214397625047877  
0.4989341800110106 0.3259838761161476 0.8225640081705127  
0.9022439518510001 0.8227454085451260 0.3737369248610516  
0.9964024785275019 0.9756934685692095 0.8738462185128109  
0.9942310878024181 0.3246964241551958 0.8786475721616706  
0.9006590860677065 0.4743594113088304 0.3782950308815380  
0.4909359769641403 0.952088502622276 0.8162441725372517  
0.3942067623073620 0.8297512489514139 0.3231510549889812  
0.6254559167992386 0.2286126273665305 0.2866664853491652  
0.1184593291315977 0.0721588793797311 0.4041293578843245  
0.7746096902495987 0.7286832749965659 0.9099362079418520  
0.7737725269678231 0.573732862288219 0.9168249983927609  
0.1249101518078253 0.2262642360612376 0.4140036586898250  
0.2726774953275642 0.7302515878115199 0.7876088309447353  
0.6200286892572406 0.0715727691196209 0.2933710636557974  
0.5189338171448854 0.2722027081930148 0.4504522518156449  
0.3809776711091194 0.5229465220474417 0.9497186389859473  
0.0165995801708093 0.0202425851235063 0.2531914440039619  
0.8719629114832409 0.7784904602211843 0.7557591620379668  
0.8692894885865621 0.5225072106723296 0.7608424646222411  
0.0258222991619686 0.2776297305847968 0.2605577063766341  
0.3661508475094605 0.7782302369741345 0.9480761686809897  
0.5178255038611310 0.0273494936503860 0.4446429982237616  
0.4838810629843488 0.2195120837334206 0.6597572697705942  
0.4106624014954233 0.5697753514384862 0.1571957760757375  
0.9749482113732885 0.0713706334627075 0.0516136205183505  
0.9177004546744896 0.7284771974769710 0.5532061935568303  
0.9180071573486893 0.5710784417008106 0.5587801814266670  
0.9771148536457894 0.2276576527558228 0.0588644626101407  
0.4086762559900429 0.7259436440472825 0.1547099700276725  
0.4673320540266735 0.0640776507171458 0.6522012781376948  
0.3267740284437030 0.2385933106494930 0.6335534004991110  
0.5694606568639078 0.5688380629485411 0.1422582721012784  
0.8179136100245449 0.0733153819796847 0.0640522057798709  
0.0748986673340806 0.7293295365756828 0.5623701569116670  
0.0745566099874879 0.5704738203685740 0.5679168197648515  
0.8204327937745822 0.2305202461495453 0.0677004194393304  
0.5679924556257673 0.7261596214452913 0.1360431201708056  
0.3132302786312072 0.0815629805541612 0.6313198911038059  
0.2685609562732414 0.2776807158924643 0.4225032363416018  
0.6276189769992164 0.5242682617907256 0.9333080401126275  
0.7687057947622061 0.0209931027186211 0.2720663887549957  
0.1244276163298791 0.7778758435281711 0.7707298296538670  
0.1224305487073826 0.5234223890761406 0.7757403227213611  
0.7721873261187776 0.2780370415178389 0.2755393270551690  
0.6269904006583403 0.7793479009705044 0.9262498974146046  
0.2647579159509325 0.0269273230537784 0.4251387289851879  
0.3995055617529756 0.2318433324198944 0.3098390396216034  
0.4968517850887094 0.5721033938007728 0.8263431534743753  
0.8972369491411283 0.0716867267625740 0.3855144133035861  
0.9934451987178629 0.7280730825588985 0.8860529616077739  
0.9905589245784762 0.5742120899376884 0.8881343407570567  
0.9033937260395999 0.2259785750295037 0.3886843240796695  
0.3975712165551446 0.0764947571634187 0.3144136671861931

Structure 33 S=10/2

1.0000000000000000  
20.1473052208877697 0.0000000000000000 0.0000000000000000  
0.0000000000000000 19.7681594983396742 0.0000000000000000  
0.0000000000000000 0.0000000000000000 13.2309279702280254

Al C Fe H O Si  
2 1 2 10 198 94

Direct

0.2701949138596780 0.5752736860475208 0.7814945834794124  
0.4935077026555683 0.7384791701452307 0.8265371758410729  
0.5465756416664945 0.6264256829368369 0.4350582206246745  
0.3223029215624952 0.6169554960737346 0.5615093355992143  
0.4892827893245768 0.6734988677103326 0.6326624135915528  
0.5351678908499388 0.5588040046841175 0.5487526370344853  
0.2397985256109278 0.7085688598081940 0.5727035219674916  
0.2458283648863402 0.6650083554137372 0.3864783350802259  
0.6019183621196783 0.7278607755151327 0.7179309444415005  
0.6250381983228962 0.6720291686823251 0.6393102575303919  
0.2150661363522441 0.6163043081268975 0.3062020502233389  
0.3081089009732515 0.5839343659969692 0.3912655969893071  
0.5871438193205415 0.6000274849637597 0.3965070395025730  
0.5554392830260148 0.6811292980794240 0.4315138872045401  
0.4985903586233776 0.6139922996939223 0.4003242467512771  
0.7022290039756401 0.4670574773450791 0.3066272541104320  
0.1932963997620019 0.3364760883492856 0.8095201645497571  
0.2049551525636776 0.8306082476372847 0.3974829189375320  
0.6916257605260980 0.9789495816090543 0.8968501523870213  
0.6937648388323872 0.3255565535632484 0.8783981113845138  
0.2070270279130643 0.4762556665826670 0.3834311550764216  
0.1937499916929132 0.9675959339022773 0.8145192235541389  
0.7030452648901274 0.8238481332330541 0.3058573117691042  
0.5899406406866829 0.4578111859004924 0.4075398597208522  
0.3074077668138271 0.3443447602779857 0.9006396157172293  
0.0931629080375273 0.8334642252777350 0.2938583832956750  
0.8033116582008055 0.9669838975021187 0.7905037677442405

0.8079362101800878 0.3319148072447479 0.7854117002826574  
0.0928171012829565 0.4670705316269815 0.2874950678686992  
0.3063636644089346 0.9806086230109390 0.9177751401838057  
0.5937009651338039 0.8390577759957836 0.4110160335471891  
0.5964491552435999 0.5293037705688382 0.2393510115372378  
0.2995422042297202 0.2833774330382341 0.7226128292174290  
0.1013531325614985 0.7577658982554106 0.4589526665891687  
0.7998968010645351 0.0415086661441274 0.9572239888771329  
0.7982283408528483 0.2596598648508436 0.9544128959633771  
0.1017878731877907 0.5432611269038587 0.4520955901908075  
0.2875165713436426 0.0543347932222248 0.7554120458416096  
0.5948321587562406 0.7569355486413354 0.2510439256379217  
0.6011991643889543 0.3930937648304110 0.2350706015582253  
0.2870384312631882 0.4178904572738312 0.7368249967555700  
0.1000956322079487 0.8917682865317204 0.4747508549445342  
0.7934335745558628 0.9070973000994607 0.9677330657910898  
0.7929209194912706 0.3942932754736487 0.9612879867404822  
0.1052059857914521 0.4093886486754979 0.4678567478524484  
0.3078662014920097 0.9228855481390263 0.7367295637485369  
0.6011476399829884 0.8905397347418186 0.2260859458882943  
0.5188602967059592 0.4704108871006095 0.5700449759153969  
0.3854552775696744 0.3538672983804173 0.0565596418015616  
0.0244353618873710 0.8588094919243190 0.1279012483788015  
0.8712552732578892 0.9368457452686668 0.6263358673426708  
0.8770970273570220 0.3630993679993530 0.6238486988850501  
0.0224679407316503 0.4392620898099355 0.1256052904902815  
0.3661425246253679 0.9462692568121692 0.0886104642961891  
0.5216998826970587 0.8608388167912265 0.5747191091473454  
0.5130134553853957 0.3540037414388583 0.4702971949745034  
0.3964314113023252 0.4453767734551731 0.9094666794241192  
0.0134464331897214 0.9404319760072568 0.2885584204073610  
0.8782043836549644 0.8558300173825728 0.7879862916776548  
0.8823338249108315 0.4432790565073575 0.7867768733869660  
0.0159791383700538 0.3574076414286804 0.2871961735543581  
0.3455165830650169 0.8556898576107983 0.9413029851354295  
0.5123591888169179 0.9464467966180458 0.4188775155288523  
0.4580968509378187 0.4672291247525087 0.3969848567123253  
0.4351709889393352 0.3213038647435914 0.8740356039455054  
0.9616967434026318 0.8190596394542488 0.295152513389586  
0.9357481049593918 0.9743598136011147 0.7924574409572963  
0.9387572183644243 0.3229887617632474 0.7907919511670884  
0.9615336392361391 0.4786857827334184 0.2940519417641983  
0.4372088665593918 0.9519830766838084 0.9244194182254150  
0.4645674672142598 0.8212672784947853 0.4047384871582452  
0.4726839306386300 0.5294259655705104 0.7284619720091758  
0.4214742019914590 0.2688391656029102 0.1981227867389961  
0.9822575177892351 0.7782249267019283 0.9840259639428486  
0.9090961840074639 0.02082137611704227 0.4835734345243379  
0.9086998902412564 0.2764217438212282 0.4815837284825688  
0.9858000464191472 0.5204827576850196 0.9784470019938394  
0.4076606341679973 0.0212179160431405 0.2376327689525392  
0.4755769206213414 0.7670167874024026 0.7004163279812891  
0.3945868206677047 0.4445058627000303 0.6272241588699542  
0.5120626159275495 0.3439689302061174 0.1061489452225940  
0.8984461724014239 0.8652318757656520 0.0727756007535076  
0.9977583650954485 0.9411565919053365 0.5753218015246839  
0.0016962964687892 0.3564643218266784 0.5615971166174067  
0.8974892005634459 0.4373107695638973 0.0664890794232463  
0.4942331288750102 0.9430989998913955 0.1400792967267727  
0.3934648665847432 0.8603817393196985 0.6214083719840019  
0.4969647579659560 0.3963970121207497 0.7336576657302741  
0.4293719356164125 0.4017795072863544 0.2324498272234879  
0.9921981071928941 0.9098467843514780 0.9484707776379182  
0.9087446345213582 0.8889126732923571 0.4483957885384268  
0.9074554685471514 0.4081169045785233 0.4433114200461361  
0.9918185558241339 0.3879254587135424 0.9475419740707215  
0.4027930940051768 0.8874199254332183 0.2576672360943759  
0.4845733092374808 0.8893436124118707 0.7630357097580842  
0.3015724350470515 0.5400181429890283 0.6631816260358736  
0.6084997582488033 0.2651039156787681 0.1784298166291117  
0.8146132190931025 0.7757238649645148 0.9972132661428367  
0.0842848269855626 0.0246279205561548 0.4909134451392223  
0.0961428037383667 0.2752165000820976 0.4916383661219960  
0.8077142891653974 0.5249265549406509 0.0018322108841027  
0.5836399327407151 0.0240163026272666 0.2234056988378982  
0.3055978705529750 0.7880067184188453 0.7253203297089929  
0.2766586323451984 0.4325520397462157 0.5414805091906724  
0.6356698156252920 0.3633938357270409 0.0481295652075304  
0.7754953928562783 0.8549245060933333 0.1464714919721185  
0.1207774585593527 0.9526919569756631 0.6487511371328236  
0.1209972815981156 0.3535673454347434 0.6464549165588690  
0.7755381724893897 0.4381683662933272 0.1455658684192389  
0.6144320030264651 0.9582754179940323 0.0573072886180335  
0.2656503507464910 0.8620450878813185 0.5702456600679575  
0.3327225548365180 0.4280962271676648 0.3578534003029187  
0.5641740906931125 0.3415814185841570 0.8840013841990576  
0.8317273286621332 0.8216577541535697 0.3205088227072710  
0.0652124874048468 0.9841447573248578 0.8244055005728559  
0.0670652994690170 0.3152748135406286 0.8218128496115654  
0.8311027122739822 0.4767179890424745 0.3166228935407518  
0.5641881781761175 0.9631836681287058 0.8737650288305704  
0.3344554527010787 0.8323406102503503 0.4071162853690657

0.2366695349786727 0.3479733847613952 0.3997146095486584  
0.6428695924615773 0.4489841582133632 0.8941862661018085  
0.7705479960125308 0.9398802157395006 0.3023091199700941  
0.1132217136961532 0.8613733181017333 0.7958672516777590  
0.1083524100003221 0.4408738221504751 0.7991343498870479  
0.7740609031907262 0.3556141309316701 0.3059798527960149  
0.6415743208720236 0.8585455065114119 0.9276584978513668  
0.2681673937205012 0.9481179635648496 0.4152943455488633  
0.3873842750642056 0.5289543081849257 0.2578720542145587  
0.5159206485807307 0.2638931320591562 0.7421581147128206  
0.9061359520109633 0.7536344501358062 0.4450693295882755  
0.9804266073530176 0.0450073452127744 0.9434766609917848  
0.9855502460502653 0.2530903728535262 0.9436631117040745  
0.9030122577457087 0.5440255396513045 0.4436592103777355  
0.4717876674115937 0.0237814489942260 0.7675957426602984  
0.3930048122321813 0.7526077963067310 0.2762553990818538  
0.7041822063296870 0.2414446263552526 0.3139245524057784  
0.1927562730247846 0.5452226569629429 0.8130599359198180  
0.1972820327953466 0.0602623384685738 0.3955237714914236  
0.6969879980547282 0.7370982890719777 0.9216057690949281  
0.6953290610502407 0.5706086380999981 0.9167093675955899  
0.2051162354063263 0.2210436362390724 0.4034795040848981  
0.1938275742567832 0.7574835994577134 0.8232454057539506  
0.6993729468278770 0.0515851651057090 0.3161277389083235  
0.5805600886544078 0.2599426254763403 0.3735228393295013  
0.3262030045919540 0.5574820700691634 0.8755697118648610  
0.0884746387804867 0.0510435743637941 0.2930202269694937  
0.8011003963910780 0.7475274803068563 0.8012268007819494  
0.8013366809709893 0.5495246686027141 0.8035864327146622  
0.0962486569998376 0.2497727984238168 0.2952527604884907  
0.3088708072460961 0.7307182344899565 0.9075337951094844  
0.5879480600392674 0.0570333938934534 0.4178511378538107  
0.6123493537408832 0.1482475591064905 0.2732590138260033  
0.2716506155998282 0.6603186583754476 0.7449353473080811  
0.0987549144407482 0.1487565530174683 0.4306837611919734  
0.7973657594513056 0.6504714254364848 0.9401952965196677  
0.5268218676425921 0.2319436862759606 0.5487559904658890  
0.3691894480113390 0.5286935284666608 0.0621771891325578  
0.0150847890745461 0.0246269172169685 0.1331902030346133  
0.8736590298766388 0.7672971355648492 0.6371744180440330  
0.8732648986426353 0.5316194865376889 0.6371595533153758  
0.0184585987154448 0.2707937699263975 0.1357163225363390  
0.3653606573231624 0.7644536622111040 0.0825881091929527  
0.5133432562493451 0.0282445997199332 0.5782795269533944  
0.4475716494525311 0.2508575145790882 0.3924030718244998  
0.4545201574557775 0.5630396499204448 0.9235260817216894  
0.9575553069903181 0.0607200624753264 0.3055902903672683  
0.9330709879030669 0.7349374349634860 0.8089744941162250  
0.9315176833194113 0.5668047622052449 0.8091026212395016  
0.9657477506955111 0.2344974136838928 0.3113371851507403  
0.4384878180627578 0.7607687743092846 0.9172582498956263  
0.4570040262945920 0.0687008809334143 0.4090487221228449  
0.4913089218719318 0.1407954152893619 0.6838205007112921  
0.3885640588285426 0.6441834652604955 0.1609830027604950  
0.9953038890303277 0.1487677315961473 0.0660141310262490  
0.9113457508987955 0.6489944976062867 0.5653380250941046  
0.4076709338863997 0.2402609510927161 0.6321044631587601  
0.4881986031041198 0.5576382455973884 0.1381483218613172  
0.8935935846193316 0.0652042009477139 0.0928296833482468  
0.9997247983590906 0.7488138517538615 0.5875716748291737  
0.9990488640391278 0.5485034296317363 0.5804110403368773  
0.8951989380776818 0.2360161875113876 0.0872506308826813  
0.4876364273508172 0.7316454537534435 0.1407672612621760  
0.3897939314500047 0.0637729588911876 0.6239639529810470  
0.2997472701485536 0.1615324260041986 0.6417500658630862  
0.5891268759537764 0.6451089857527680 0.1422912901746343  
0.7926904889386367 0.1509312769723083 0.0704633930419061  
0.0874423533007329 0.6485882752139059 0.5709415075984928  
0.3020414121788796 0.2688195816131464 0.5242281398684476  
0.5989464419457005 0.5292147721310563 0.0399734227210221  
0.7741605890449239 0.0302307556344714 0.1540633047308650  
0.1219519291660139 0.7647763463066959 0.6563048647304327  
0.1195085770966696 0.5288399140297106 0.6494162138903532  
0.7765380153623931 0.2718234363158994 0.1513259942584352  
0.5997595285493206 0.7638866341195751 0.0507671259911364  
0.2686092080618962 0.0420570051920561 0.5595615903582859  
0.3224656438650180 0.2544531250448012 0.3286424856460851  
0.5759551971807092 0.5597924924445247 0.8457485167085284  
0.8281525682919124 0.0586232507772341 0.3339410846823219  
0.0634258705407794 0.7409745011531804 0.8336926338943840  
0.0621355727940529 0.5635652664589805 0.8237690226960015  
0.8344131614337623 0.2372057324705319 0.3248115104030309  
0.5769125293467341 0.7534526444196485 0.8505502288063540  
0.3268040115055344 0.0662817719866148 0.3828784740274841  
0.4003258937016276 0.1508015777382869 0.2781535750547390  
0.4904689622834117 0.6523567967781948 0.7835588159600174  
0.9022414835108397 0.1482867176182071 0.4302911525762905  
0.9930306322825615 0.6500360018783371 0.9333127617017106  
0.5463920824084125 0.6075295428748492 0.5415023361538855  
0.4099015195591678 0.6539662186846583 0.5880513860347184  
0.2598569278514021 0.6802461991527229 0.5208761662246884  
0.5933354709258858 0.7085507235349237 0.6499260890545823

0.2557922547946959 0.6401295334112547 0.3232482907513457  
0.3319996407056828 0.5630961245096380 0.4500652606927578  
0.6226241627654329 0.4612370742518068 0.2947714895392777  
0.2717482363600364 0.3453039853820452 0.7904786830061832  
0.1248860184533833 0.8283814252077772 0.4068085783633179  
0.7717780368238283 0.9733771097515939 0.9034912242716920  
0.7735529655854925 0.3275326836330920 0.8961467910658095  
0.1267544947631379 0.4734665739421278 0.3988055315189641  
0.2727748586553604 0.9807471144678709 0.8058754295120565  
0.6230725937720124 0.8278051987172229 0.2971380102898024  
0.5198248340204566 0.4347506031545301 0.4576293190229933  
0.3812230324965454 0.3667582183652723 0.9360988010761182  
0.0233204087607913 0.8627436353836702 0.2502258958607878  
0.8721098978444972 0.9336693810980815 0.7487318271182940  
0.8768786067983602 0.3656011894640835 0.7459084622772697  
0.0230354255469985 0.4353768322565960 0.2477412565871905  
0.3638943832016879 0.9333555452907721 0.9677838554928377  
0.5229780439818212 0.8677881850505282 0.4523753739304179  
0.4691541795139597 0.4584711344209186 0.6674881172044996  
0.4363997764303111 0.3424206209468486 0.1492220495494226  
0.9741864404662790 0.8530533739003939 0.0321595758177026  
0.9221765328351778 0.9468675122412599 0.5322871078153850  
0.9246491860010579 0.3509097300150461 0.5266103967937925  
0.9741062986466834 0.4465949563085505 0.0280992874818854  
0.4182827817059975 0.9494131567220114 0.1816648512474046  
0.4678797879630144 0.8455147760470400 0.6631738495414085  
0.3151255651577701 0.4595740778364775 0.6401434708361272  
0.5889836477154550 0.3410952321699620 0.1417661941367041  
0.8208962149131587 0.8508840202810932 0.0457358632823930  
0.0756134868723497 0.9524578115618481 0.5474354054897702  
0.0809148969812432 0.3487416123080593 0.5409991116666198  
0.8190223740662015 0.4485071887632112 0.0436749311507950  
0.5728474946914980 0.9539609677897287 0.1617072028998798  
0.3172795981242238 0.8575426379702283 0.6644534228103181  
0.2646355188583260 0.4242639710127949 0.4211792329733814  
0.6337005179793668 0.3700155996993987 0.9257415148924477  
0.7705229661475932 0.8608903861392420 0.2684185598236965  
0.1235453961997520 0.9409069464760793 0.7702749308357091  
0.1222310511632342 0.3628917286556361 0.7683651862934275  
0.7712786394502403 0.4337059178047851 0.2677905849335294  
0.6272174646452957 0.9387783498865052 0.9397366226391982  
0.2681395178789164 0.8687224109820649 0.4474512394664013  
0.4006809028844218 0.4572417157058115 0.3121657197535305  
0.5024385825988645 0.3311706765838895 0.8083461934402715  
0.9023696852001689 0.8220786144688668 0.3780273749697485  
0.9933951371040067 0.97703879388200571 0.8779710538132662  
0.9958957826941270 0.3210281713518537 0.8770637814152804  
0.9013664685186337 0.4759565496521714 0.3754488781310127  
0.4892611112701854 0.9570299814584403 0.8322836524503575  
0.3980430546239307 0.8241741251304621 0.3348971787847558  
0.6267567552307661 0.2282907198150566 0.2851448374471959  
0.1179494986146159 0.0710629366330005 0.4036484512291278  
0.7766211771115676 0.7281394622180158 0.9155207524165573  
0.7757203434512142 0.573233822336695 0.9153647397222915  
0.1244402019286397 0.2247264794836210 0.4050940541065071  
0.2696807809828717 0.7327917410410661 0.7997260749822624  
0.6214997962063733 0.0700443083015492 0.3071062773487006  
0.5168438449072300 0.2736231352246201 0.4443975045606633  
0.3827776329374914 0.5241867723010903 0.9410817198164093  
0.0186017474822805 0.0192149588413211 0.2554746003888101  
0.8717821353512857 0.7763302913654724 0.7591674825073418  
0.8722766669350960 0.5227498503441166 0.7592279287428946  
0.0243763163312912 0.2780220683635931 0.2576411192745340  
0.3657202560953360 0.7769696347055471 0.9609347258045525  
0.5178274827189467 0.0250987146055823 0.4557992892434121  
0.4843967666863675 0.2192224749926500 0.6515984447031157  
0.4085539035925068 0.5655773724397271 0.1537532332577763  
0.9706711192856051 0.0711936920849630 0.0579814205958610  
0.9234631115718513 0.7293314901847533 0.5586953488436374  
0.9224337153610105 0.5685528341101107 0.5565312391833558  
0.9731421287237251 0.2271454745273372 0.0577680339591468  
0.4087670802889827 0.7229495614736893 0.1646308901399447  
0.4663045740063009 0.0644204587402235 0.6626525737270004  
0.3272092901687346 0.2381617753474171 0.6305443684763863  
0.5675831192225177 0.5660056429843198 0.1387491211148748  
0.8151042207118195 0.0721632781775403 0.0684551125472682  
0.0773817369613149 0.7294630743344815 0.5683996309361063  
0.0770607080234064 0.5676464767674315 0.5635458312101542  
0.8162025883354491 0.2293329887152069 0.0651125790609919  
0.5673530761712795 0.7243761870217011 0.1456772058153112  
0.3119301882743532 0.0806923398774245 0.6454360579757743  
0.2673849213982425 0.2726771776916658 0.4139483227063276  
0.6280634037249517 0.5267863336287318 0.9256980251386351  
0.7685914886227586 0.0200173862110195 0.2761652678142006  
0.1231201672812478 0.7808442083841844 0.7776493980786960  
0.1225465680769508 0.5203724906731758 0.7730573368455977  
0.7724514121906187 0.2763360130525423 0.2742404280038671  
0.6278242251727499 0.7779821185517446 0.9374389137694762  
0.2655570861557986 0.028628982261926 0.4383466980967931  
0.3974819895222974 0.2312766808949329 0.3004734877149782  
0.4982487746451211 0.5746224127984760 0.8233228351183802  
0.8991517303095300 0.0711951273297632 0.3884588518855849

0.9933501659426679 0.7269237792702007 0.8900847399634155  
0.9941086843006953 0.5739556897347207 0.8863183172153464  
0.9028544136171106 0.2250305523306487 0.3868673801063981  
0.3975109210925936 0.0757567424411182 0.3267082250917588

Structure TS reaction 32→33 S=8/2

1.0000000000000000  
20.1473052208878016 0.0000000000000000 0.0000000000000000  
0.0000000000000000 19.7681594983396991 0.0000000000000000  
0.0000000000000000 0.0000000000000000 13.2309279702280005

Al C Fe H O Si  
2 1 2 10 198 94

Selective dynamics

Direct

0.2721917237608622 0.5740614104603736 0.7850690458659741 F F F  
0.4934807027143222 0.7379855229560519 0.8198297776742436 F F F  
0.5073923031239644 0.6629913042813556 0.4433386228219405 T T T  
0.3251949166961623 0.6280654822341489 0.5862737787479020 T T T  
0.4970249749947868 0.6663014860565823 0.6286411084797479 T T T  
0.5288246925021411 0.5585944709003812 0.5517286353446025 T T T  
0.2169540037791293 0.6788663745808705 0.5874838585458519 T T T  
0.2339209390832551 0.6530196233874790 0.4016487845592991 T T T  
0.6040510448805350 0.7304246824903728 0.7159737025851101 T T T  
0.6284587357682341 0.6734610128858520 0.6398646642393899 T T T  
0.2234747912637900 0.5902357504712867 0.3312340740197897 T T T  
0.3099574252599098 0.6006016276613764 0.4151555203005088 T T T  
0.5573304974700619 0.6601000621356690 0.4126559591290047 T T T  
0.4876663965830801 0.7138521436756662 0.4548681450046388 T T T  
0.4713905304473656 0.6245320871634874 0.4216337308323617 T T T  
0.7019552368471977 0.4694101574643383 0.3099680749972080 F F F  
0.1928054302136104 0.3316183323400423 0.8105242167833140 F F F  
0.2047997023075467 0.8276374373123403 0.3954180979915236 F F F  
0.6920650357467579 0.9796462356032762 0.8917094389566813 F F F  
0.6934871683781978 0.3241395890265721 0.8845368455017422 F F F  
0.2052092637251093 0.4789788732320588 0.3865745265501204 F F F  
0.1966601982887255 0.9691255118399482 0.80949074011929602 F F F  
0.7043280814344399 0.8238196322429658 0.3038049053601171 F F F  
0.5903273699313303 0.4588141553421821 0.4135465696790490 F F F  
0.3062280541995435 0.3423394906493797 0.9049419725193317 F F F  
0.0941454037075147 0.8339026300428998 0.2894831532361621 F F F  
0.8049917496032677 0.9692680076691573 0.7879123165524433 F F F  
0.8058455893392704 0.3333785723845466 0.7863955034909296 F F F  
0.0924355949760951 0.4674984345540807 0.2874478504958944 F F F  
0.3102429054852891 0.9828431098688952 0.9110668898942720 F F F  
0.5935071555589602 0.8414269576715228 0.4032999498599423 F F F  
0.5953512005931785 0.5332671282073846 0.2467173230719979 F F F  
0.3003684406527611 0.2784757489029914 0.7288683586907823 F F F  
0.0992688912476325 0.7570110306006299 0.4541530708822634 F F F  
0.7987272946545687 0.0435898525103298 0.9544906266102515 F F F  
0.8009163928931358 0.2605765603263848 0.9551720611215231 F F F  
0.0978652358731722 0.5426510473346440 0.4532146465101974 F F F  
0.2892929766476371 0.0552364836341752 0.7481655272942596 F F F  
0.5953420949234527 0.7597448251512446 0.2437962860351917 F F F  
0.6001330117432317 0.3972889858903201 0.2389359592852500 F F F  
0.2858352407690177 0.4135469760208963 0.7385940884904372 F F F  
0.1003105656762600 0.8912130524148267 0.4703039193565530 F F F  
0.7946887960864331 0.9090621165411434 0.9643366945773906 F F F  
0.7927867960376176 0.3950157478894027 0.9633925238455774 F F F  
0.1047200042149896 0.4083170531817828 0.4666528191816042 F F F  
0.3107551353891580 0.9234513966008890 0.7316808164210826 F F F  
0.6070217918772016 0.8932496183916072 0.2184731138627214 F F F  
0.5179775187816205 0.4645311773843730 0.5766415374799934 F F F  
0.3819237352667173 0.3540281698755905 0.0641966362100064 F F F  
0.0235083905811564 0.8590110660482040 0.1261495133049877 F F F  
0.8723987321780839 0.9373203273585204 0.6244895018913610 F F F  
0.8763384672211529 0.3627222120988520 0.6247081368164586 F F F  
0.0220854307238767 0.4399706376042545 0.1254509699741462 F F F  
0.3676658494170510 0.9467085277910527 0.0823063945790352 F F F  
0.5215753012830930 0.8589180366670917 0.5674471753190318 F F F  
0.5106805999872606 0.3538339980694118 0.4614531643006430 F F F  
0.3939739296521196 0.4441323188484390 0.9145278049127157 F F F  
0.0135137281893591 0.9407753092521958 0.2867196177148799 F F F  
0.8781238275630159 0.8567983588028554 0.7868958637606127 F F F  
0.8816213761239666 0.4436365965498226 0.7868992186833523 F F F  
0.0163076715467980 0.3575960088607744 0.2866490496713183 F F F  
0.3433546824619711 0.8564499663124039 0.9358522707674837 F F F  
0.5110180957658912 0.9469863784837358 0.4135085881158460 F F F  
0.4591745702079990 0.4710575191464059 0.4018633158025509 F F F  
0.4347406207815609 0.3197466569814154 0.8855040320652776 F F F  
0.9634235134982774 0.8185955847633579 0.2956733111928713 F F F  
0.9377562035500446 0.9745657316960106 0.7898138678414881 F F F  
0.9365924663652905 0.3228475596960649 0.7928515071629576 F F F  
0.9612334566850649 0.4784352087058963 0.2946008470834300 F F F  
0.4400861785354593 0.9481605309390702 0.9193130322930330 F F F  
0.4641936624719492 0.8224808602883869 0.3963971054903368 F F F  
0.4710166910405960 0.5240855454765736 0.7376489269951279 F F F  
0.4247899042675698 0.2730583227457970 0.2076413564653379 F F F  
0.9826292712175970 0.7781390739374601 0.9819084782568055 F F F  
0.9099790308494491 0.0209281711925513 0.4810810792780131 F F F  
0.9103862450267215 0.2759228737967803 0.4835382993305259 F F F  
0.9828860684579084 0.5225197390693523 0.9811397964397841 F F F  
0.4101549723606723 0.0235526589477359 0.2288587220326050 F F F



0.4751442761186624 0.7627962076608412 0.6917037169637084 F F F  
0.3934003423477748 0.4415301219994205 0.6299105815767660 F F F  
0.5098584866506997 0.3509326246056830 0.1102398314086983 F F F  
0.8975122064841017 0.8638758723191984 0.0710185098384102 F F F  
0.9986517604316205 0.9408705647601394 0.5718716380126097 F F F  
0.0016674333799003 0.3574007275664570 0.5647913802793454 F F F  
0.8963675744825181 0.4380510591066624 0.0703162149778080 F F F  
0.4947238800754761 0.9390481596301967 0.1396256996425151 F F F  
0.3937347241457516 0.8579979001293836 0.6136865498660100 F F F  
0.4931397291123858 0.3908734715022817 0.7379732318626608 F F F  
0.4252012198153352 0.4063521363391231 0.2370793568809404 F F F  
0.9909860026309190 0.9094248349601912 0.9470544395162648 F F F  
0.9083351652075891 0.8889673122294610 0.4463869664470650 F F F  
0.9079419003641647 0.4074309772143963 0.4441667409451640 F F F  
0.9895247637466369 0.3905798825324922 0.9470398455325082 F F F  
0.3982489056507106 0.8908023938315281 0.2554755250796319 F F F  
0.4838713652637807 0.8855109012655547 0.7557222306175149 F F F  
0.3016287713367092 0.5369959750100861 0.6698607967309940 F F F  
0.6033224580174519 0.2687080653463028 0.1843542569974232 F F F  
0.8117457338331278 0.7768391021721328 0.9946585470679992 F F F  
0.0878425842542825 0.0240484892026487 0.4926370193700436 F F F  
0.0961480454780954 0.2752337080245653 0.4965056258800189 F F F  
0.8078458320848014 0.5258410809841649 0.0028524880267398 F F F  
0.5820612251506887 0.0254298843061278 0.2159673326572644 F F F  
0.3050779108114057 0.7888236285706327 0.7185675901812516 F F F  
0.2738466301435878 0.4349715028119974 0.5446559249912255 F F F  
0.6347018161296845 0.3638036210957338 0.0529033112289596 F F F  
0.7740126176648445 0.8576325076649240 0.1428191484200312 F F F  
0.1215955221187315 0.9471067232715953 0.647112623111225701 F F F  
0.1218063537062690 0.3574594923379877 0.6475996839206388 F F F  
0.7737902110162906 0.4399318822029343 0.1472094911474073 F F F  
0.6110593558886279 0.9610525114759056 0.0482400169209072 F F F  
0.2653134383620639 0.8647299764042273 0.5659995784676681 F F F  
0.3321282487176092 0.4402290891680209 0.3664458558146109 F F F  
0.5640206989188954 0.3403499427536332 0.8883137261022469 F F F  
0.8333262892119961 0.8230645854183223 0.3136846005261731 F F F  
0.0676523697005322 0.9783817459317348 0.8227223091365303 F F F  
0.0654203481890221 0.3204153028164569 0.8205208566722533 F F F  
0.8310089518886414 0.4760755047757073 0.3179577373917795 F F F  
0.5657695471216257 0.9600641858095358 0.8614557306341339 F F F  
0.3339153534657271 0.8313803874694159 0.4046291337634784 F F F  
0.2394970273839547 0.3507933729382628 0.3967307585396611 F F F  
0.6432161926551530 0.4479453699458062 0.8982475586282987 F F F  
0.7708985222092295 0.9406322633217954 0.3012161552167001 F F F  
0.1245295529085553 0.8579649133186180 0.7984741934942789 F F F  
0.1179490899845632 0.4429686239658466 0.8035089695320323 F F F  
0.7716626646251044 0.3563099104303618 0.3062554546207963 F F F  
0.6443356610953757 0.8589508558968362 0.9262936821333909 F F F  
0.2654854093062156 0.9469118600502640 0.4070504873773473 F F F  
0.3900954038007427 0.5359948574403077 0.2651765314310026 F F F  
0.5124194811238212 0.2589211492777395 0.7541078000517913 F F F  
0.9033050559450899 0.7538009472097968 0.4420713181752163 F F F  
0.9857438845091551 0.0447721026919936 0.9398529078099997 F F F  
0.9876246749156010 0.2553541280011373 0.9445471160367660 F F F  
0.9034028104963667 0.5432353968964136 0.4445881673991821 F F F  
0.4700625746658886 0.0200410245477087 0.7602946703418993 F F F  
0.3913769991104061 0.7549106304942583 0.2691968416773278 F F F  
0.7038883498792146 0.2409744885837668 0.3107400319785967 F F F  
0.1903404813935126 0.5570409945633941 0.8106113641059309 F F F  
0.1975657772840478 0.0610892505364760 0.3900566019049450 F F F  
0.6958339103975746 0.7363078135014760 0.9143531753305822 F F F  
0.6942105054930821 0.5701140540982905 0.9203701170447545 F F F  
0.2059718797081516 0.2241134446171813 0.4076737234620680 F F F  
0.1947030726598129 0.7439998047951590 0.8091813185598582 F F F  
0.6981575895491048 0.0516703578543556 0.3083587665334662 F F F  
0.5826625881865013 0.2560767870085883 0.3812808085141697 F F F  
0.3214751612304241 0.5555495233187742 0.8865224372888107 F F F  
0.0858069568268576 0.0530030257810026 0.2950843765957671 F F F  
0.8022432283527152 0.7471914937495043 0.7991034835973707 F F F  
0.7992403363147460 0.5489532270049224 0.8045261157609929 F F F  
0.0964760471949333 0.2503502430877163 0.2995051065561256 F F F  
0.3098587161573292 0.7307094533421932 0.9004672313192970 F F F  
0.5874863039681983 0.0570695081654407 0.4112028023036700 F F F  
0.6115254498561953 0.1490794212774276 0.2678911113051043 F F F  
0.2853741441051412 0.6576381369967521 0.7357642276401961 F F F  
0.1007115900614650 0.1491345436456299 0.4340483306563101 F F F  
0.7964542170277440 0.6508889023251996 0.9390867786112551 F F F  
0.5286503225529060 0.2376146487797612 0.5582431943760611 F F F  
0.3697996768096132 0.5258375040873418 0.0694622802807885 F F F  
0.0163141927881014 0.0251510731134630 0.131565998875205 F F F  
0.8733508599883919 0.7695379868784542 0.6350081378323651 F F F  
0.8713859350167041 0.5318108342373549 0.6378075300143351 F F F  
0.0209844043841727 0.2696740328173277 0.1369295888821682 F F F  
0.3657599745538960 0.7653183024030241 0.0754533790282821 F F F  
0.5141646162125397 0.0286692546187481 0.5724650782223009 F F F  
0.4497447939247579 0.2434016416483047 0.3994264794986577 F F F  
0.4511289376323049 0.5634437685950360 0.9270326666081630 F F F  
0.9545080730606585 0.0600325195505036 0.3007268667225631 F F F  
0.9345212456396439 0.7364348405057370 0.805252203971009 F F F  
0.9291886980119557 0.5675131464955285 0.8100157355445248 F F F  
0.9654439337734360 0.2352409446944890 0.3111513882046992 F F F  
0.4388215614551001 0.7642524473210912 0.9095214263704889 F F F

0.4565501618413208 0.0691910269904241 0.4037265116762399 F F F  
0.4919724329905151 0.1390938482487272 0.6819693691427773 F F F  
0.3871584466492379 0.6457075290622569 0.1556101949799853 F F F  
0.9976755622516151 0.1489665697573130 0.0621968446049550 F F F  
0.9056192724899077 0.6496116261829101 0.5635781124318413 F F F  
0.4075966965245499 0.2387708459476059 0.6335917459957443 F F F  
0.4888721553254953 0.5600101379910782 0.1398575858719298 F F F  
0.8957192445542432 0.0651808994655596 0.0849074855611036 F F F  
0.9976674405829016 0.7459828578093521 0.5825181379083659 F F F  
0.9970131315435893 0.5531800157921651 0.5841730611258669 F F F  
0.8975266892261757 0.2358409520794922 0.0880636146294123 F F F  
0.4876465328043906 0.7316863858677820 0.1369995047676511 F F F  
0.3906587051560280 0.0646709187750290 0.6161567417612659 F F F  
0.2988599357850674 0.1612137335682746 0.6309514519178947 F F F  
0.5902992596963230 0.6460828233451963 0.1398901578073719 F F F  
0.7946153170550403 0.1515945860331485 0.0712000207724159 F F F  
0.0900982971159721 0.6491395035925223 0.5708603856454459 F F F  
0.3015205737843658 0.2750045927596005 0.5293300764205711 F F F  
0.6005221041348605 0.5268616972997933 0.0470505099423022 F F F  
0.7777408444864093 0.0299227989043871 0.1520397311366395 F F F  
0.1186411698046328 0.7675068752654326 0.6512320077065183 F F F  
0.1173077286146551 0.5284143777351957 0.6500127185034259 F F F  
0.7789144648550632 0.2726842925966864 0.1517173118695681 F F F  
0.5984878476057887 0.7631524301554151 0.0433567727768747 F F F  
0.2700233153988663 0.0400255550795450 0.5524941076019374 F F F  
0.3247888432235584 0.2550689421363757 0.3351185696127956 F F F  
0.5736983447822439 0.5573522368771293 0.8537862481496745 F F F  
0.8258861918773235 0.0601941605538840 0.3356091785646740 F F F  
0.0646003832527384 0.7413280790307937 0.8319465250933717 F F F  
0.0594509482038319 0.5606991848455678 0.8244243837697383 F F F  
0.8340355431581372 0.2391353613183895 0.3277205444897291 F F F  
0.5764066851540477 0.7578057078926150 0.8428412477066942 F F F  
0.3268857643776002 0.0635774687764439 0.3742773043662311 F F F  
0.3991140946918108 0.1519172885248210 0.2741941985736531 F F F  
0.4917573919911220 0.6511238144733653 0.7885003806297206 F F F  
0.9027518089370119 0.1484155466752526 0.4290572092317717 F F F  
0.9929990974286582 0.6507993727621511 0.9309663626625309 F F F  
0.5491375001080954 0.6032848816617786 0.5631270194836446 T T T  
0.4098810643952788 0.6409211748419565 0.6151743258906279 T T T  
0.2502362425981914 0.6697216204069534 0.5357568654133473 T T T  
0.5972956788467414 0.7108171489445709 0.6476299852856471 T T T  
0.2523990904320215 0.6291123942482244 0.3421250537755043 T T T  
0.3441704388935207 0.5883784862706918 0.4696758353418815 T T T  
0.6220670308932128 0.4647190193813344 0.3005702538208297 F F F  
0.2715652750776272 0.3413636098638619 0.79406635798926010 F F F  
0.1246396688210964 0.8274167164047981 0.4029620094528141 F F F  
0.7721662094985859 0.9750407937241476 0.9001336452710760 F F F  
0.7734530282886496 0.3280654518813932 0.8986149178530667 F F F  
0.1246116187243800 0.4737055784734210 0.3997468820638730 F F F  
0.2756687713564787 0.9819435216379659 0.7999789372537549 F F F  
0.6246326686877453 0.8296042549438383 0.2909241230814459 F F F  
0.5198134999035275 0.4348768008694179 0.4612877255554082 F F F  
0.3793057203352248 0.3656935820842762 0.9430690667968804 F F F  
0.0235920215686960 0.8630902329547041 0.2483239616543358 F F F  
0.8732720280822051 0.9346153273282951 0.7468738242340720 F F F  
0.8752898275512351 0.3659017092639019 0.7468193313551694 F F F  
0.0226684393861589 0.4355664397757550 0.2474876657426250 F F F  
0.3656618569502257 0.9332808720446693 0.9616856203088062 F F F  
0.5226805387316986 0.8683630045741921 0.4457021590556636 F F F  
0.4677279740526643 0.4548378234003678 0.6732622479267718 F F F  
0.4348157449861958 0.3463925093061633 0.1553691780705719 F F F  
0.9733018831456732 0.8526095581539366 0.0306185287836911 F F F  
0.9228143582729444 0.9469571145444391 0.5298376524584896 F F F  
0.9247947953267897 0.3507571264516187 0.5284692168988840 F F F  
0.9723116188250742 0.4481096307580472 0.0296714979590931 F F F  
0.4184258817139863 0.9500244069078150 0.1769709927274761 F F F  
0.4680945903213569 0.8413794589521402 0.6555737713185721 F F F  
0.3144753774365796 0.4574399506669735 0.6442895841874687 F F F  
0.5866822474088949 0.3451080086313709 0.1466090194387348 F F F  
0.8197249745151751 0.8519226294623437 0.0426315592456064 F F F  
0.0768912081004913 0.9509257255223034 0.5455919595386192 F F F  
0.0807694405467529 0.3494552340408887 0.5435060382041144 F F F  
0.8180254680094379 0.4495779095756731 0.0459603696930344 F F F  
0.5732324452994320 0.9545574185918397 0.1555247806626028 F F F  
0.3181049340124318 0.8584928532074088 0.6581830707514271 F F F  
0.2634741832125869 0.4272179034658947 0.4242276899543569 F F F  
0.6332918032017503 0.3692409001535637 0.9303769333413641 F F F  
0.7708419387691521 0.8620713549997561 0.2650651870138319 F F F  
0.1275193089462263 0.9376354732650967 0.7687091204833791 F F F  
0.1241718627000026 0.3645124442258734 0.7699120587105526 F F F  
0.7698661884750990 0.4347545895491436 0.2695094886273282 F F F  
0.6274797016523124 0.9389254901283266 0.9327863109118795 F F F  
0.2672317143355443 0.8682823528138144 0.4430117419973030 F F F  
0.4013643197154622 0.4631583302104403 0.3176122499943688 F F F  
0.5006986680485710 0.3282586104230631 0.8164119059087511 F F F  
0.9023024521130552 0.8224762469252482 0.3752873349654990 F F F  
0.9953933289314065 0.9757449898642676 0.8754495397259419 F F F  
0.9948004425653991 0.3234071482100447 0.8774265944072397 F F F  
0.9012610629807583 0.4752764525548301 0.3763371033629852 F F F  
0.4899125818377641 0.9533859302655827 0.8239918388134768 F F F  
0.3964560514410707 0.8258420742026900 0.3294647711727166 F F F  
0.6256990348995473 0.2286784601357823 0.2863095941744547 F F F

0.1184624028931083 0.0715522956580443 0.4039996388345912 F F F  
0.7756219344211885 0.7282405829122354 0.9123652775379156 F F F  
0.7744359378005399 0.5733883382746114 0.9165145581952743 F F F  
0.1251483633213510 0.2256192865176061 0.4091468043188442 F F F  
0.2735775808222272 0.7308044972861438 0.7908467378566684 F F F  
0.6204496744092154 0.0706199164864287 0.3002325777145174 F F F  
0.5178711993004939 0.2724927968638866 0.4486572564412299 F F F  
0.3811079808400493 0.5229032292409030 0.9473610381766235 F F F  
0.0175116254132135 0.0197651276143631 0.2539695335249377 F F F  
0.8722221011706992 0.7773797080672296 0.7571968299287093 F F F  
0.8702958173332860 0.5229725398806977 0.7599268885796064 F F F  
0.0250721843759933 0.2780051478120029 0.2588486136747576 F F F  
0.3661824295010803 0.7782241622349559 0.9540081751703156 F F F  
0.5174869375134037 0.0255504289382884 0.4499873048703975 F F F  
0.4842189654223787 0.2186460713718432 0.6567953186057949 F F F  
0.4094125474418604 0.5674860630498557 0.1562007437581840 F F F  
0.9733539046006143 0.0713136280301256 0.0537247344633442 F F F  
0.9205232275573678 0.7293773177352634 0.5555320251695406 F F F  
0.9199236553177528 0.5695826310947396 0.5573895440342014 F F F  
0.9753566537033578 0.2274356839855685 0.0576213447639375 F F F  
0.4085576322991002 0.7241994773137748 0.1585729588127691 F F F  
0.4665873454804199 0.0633514337273269 0.6573994505712122 F F F  
0.3272263150133270 0.2379800802672989 0.6312358123621280 F F F  
0.5684424181579573 0.5670382872523589 0.1425457195489130 F F F  
0.8167506873087689 0.0728093891437851 0.0655339981768961 F F F  
0.0756306242927030 0.7295669597809962 0.5641630441195886 F F F  
0.0753249649106849 0.5685116558851036 0.5649903980050226 F F F  
0.8184473845723517 0.2299034666923205 0.0658119555069234 F F F  
0.5675622339561528 0.7250289121624505 0.1404046533816654 F F F  
0.3126741186602828 0.0806231764719598 0.6372112767768172 F F F  
0.2686162705092059 0.2753105237678710 0.4173868277370829 F F F  
0.6274253687459250 0.5254144723446572 0.9311180580136025 F F F  
0.7686641354706438 0.0205695962419625 0.2737217812607966 F F F  
0.1252983321132106 0.7777064478216218 0.7733929463038933 F F F  
0.1230080560133686 0.5229292783213566 0.7738953321660347 F F F  
0.7722470540616797 0.2770754733179643 0.2743780390066206 F F F  
0.6275107279793204 0.7786946546834628 0.9311183060428405 F F F  
0.2654463528827478 0.0274381349811534 0.4311027068035429 F F F  
0.3993267399782141 0.2311586511289505 0.3051261693447174 F F F  
0.4967201430822215 0.5736344713035351 0.8276013010308674 F F F  
0.8981572766248789 0.0715410482117065 0.3867111088125341 F F F  
0.9940192729837136 0.7274764328460250 0.8874203821954438 F F F  
0.9919954789948804 0.5740832056131282 0.8867858875450878 F F F  
0.9030240457148722 0.2256423221158954 0.3876068271792477 F F F  
0.3978173660655884 0.0760614673662232 0.3201899049228700 F F F

Structure 29 S=10/2

1.0000000000000000  
20.1473052208877697 0.0000000000000000 0.0000000000000000  
0.0000000000000000 19.7681594983396742 0.0000000000000000  
0.0000000000000000 0.0000000000000000 13.2309279702280254  
Al C Fe H O Si  
2 1 2 10 198 94  
Direct  
0.2628653498971015 0.5730481848461088 0.8058616156087997  
0.4953785891486386 0.7291976028793148 0.8156746472428877  
0.5146717776749135 0.6435330994381933 0.3927046733768283  
0.3319804443603137 0.6269800609691430 0.6250532609304673  
0.4582646678781989 0.6673404616202375 0.6100144725776613  
0.2133407036761014 0.6390998833239175 0.5250755578416169  
0.2792998430536037 0.6391807704548178 0.4521988855381145  
0.5861810287011499 0.6507139912791723 0.6632577818629307  
0.5816117045253888 0.7184810781164502 0.6053757470012021  
0.3538277653200632 0.6130570483659119 0.3329553307398631  
0.3449392542971652 0.6923608632710411 0.3311268903930559  
0.5116161689269016 0.5891129877696188 0.4074128909912506  
0.5643104384446134 0.6625403279453627 0.4097552762530350  
0.4219943896836181 0.6708003775431776 0.4302627280596371  
0.5035780145212453 0.6535736334642063 0.3129221546825833  
0.7059416759312006 0.4778293634927839 0.3186478608015830  
0.1900974192561487 0.3250807902045785 0.8154846137740084  
0.2070776647364690 0.8255721626114825 0.3972613913757595  
0.6938136741435159 0.9768129802822521 0.8951087536023422  
0.6898610180034895 0.3283317102211821 0.8924516466339970  
0.2046557536165497 0.4819460612838345 0.3948650296586288  
0.1965396587040504 0.9752114877802142 0.8101909549378118  
0.7068216359263826 0.8247387902244282 0.3082104261972222  
0.5948146193493946 0.4633190138882875 0.4235706178283499  
0.3023449334387815 0.3376675435512701 0.9178413060341264  
0.0968264450986878 0.8354598626404489 0.2902579969552387  
0.8058681820300296 0.9691966556462304 0.7904564155890091  
0.8009111500378151 0.3388869378260290 0.7888406599572431  
0.0953471161025795 0.4651797012528939 0.2876488321993853  
0.3101855748778600 0.9827326546872769 0.9103814714676479  
0.5969901010313948 0.8405616934913427 0.4127690697756807  
0.5966049996663030 0.5403694703337868 0.2590858523115321  
0.3004874898911734 0.2694919271283048 0.7452321546533174  
0.0995116980399814 0.7584597718699537 0.4545681463014085  
0.7988114709675502 0.0447849288273589 0.9556044610691153  
0.7995028038176173 0.2646434679306481 0.9563051175423889  
0.0914738335773751 0.5385532685164994 0.4551071827602383  
0.2926382624639523 0.0564320773254006 0.7465769853863370

0.5970532208566767 0.7609679759817695 0.2528125198156694  
0.6063200748561364 0.4053855548310039 0.2450516247697448  
0.2858224610063304 0.4045937839207307 0.7475721205973340  
0.1038582715279476 0.8927821552015620 0.4710547003160447  
0.7975514684385869 0.9098780661269906 0.9685578141961918  
0.7900217817573767 0.3987829450109061 0.967245299572108  
0.1071282585216742 0.4045893170282909 0.4652474638840707  
0.3071882774848002 0.9243373525740278 0.7291383846555267  
0.6071562614964782 0.8950544596856015 0.2293710060343880  
0.5168693858850666 0.4479324615747252 0.5810125197625629  
0.3776964128045518 0.3553091443901156 0.0774643884031774  
0.0263752114760444 0.8629529480992235 0.1270792863406671  
0.8744702540063759 0.9387229466698995 0.6268173815984587  
0.8762167500173970 0.3620863536817579 0.6291573283965939  
0.0201510114325169 0.4398093523530002 0.1288770890181241  
0.3697663432494718 0.9458701215721924 0.0799125654147157  
0.5206359349054329 0.8646641916433757 0.5690937018664576  
0.5142759593349931 0.3550439197292727 0.4329695220018512  
0.3879078186117537 0.4419220838128745 0.9226769274621267  
0.0197067257285674 0.9445011509154494 0.2894703041036001  
0.8814642347349773 0.8587244780257134 0.7901543820936531  
0.8825592475940055 0.4450835379891008 0.7892284049956093  
0.0159086750500323 0.3575493587260233 0.2901886429723841  
0.3549088293680574 0.8588297054852865 0.9265169749691813  
0.5166066141947745 0.9477815590026566 0.4081784169230939  
0.4659934574205748 0.4763263593484802 0.4010433744530378  
0.4319068213281982 0.3169817860152992 0.9034352723001702  
0.9656753080291289 0.8238484037924861 0.2957734302821096  
0.9381842431166935 0.9776651851967609 0.7924090819611743  
0.9308515208830712 0.3220857922823882 0.8022570890735805  
0.9650551431377269 0.4795114019988876 0.3017434522708335  
0.4416722242424986 0.9595779397715825 0.9176637293493366  
0.4675097232549179 0.8259507187496296 0.3937354902709164  
0.4852594784351719 0.5095504916366085 0.7485992206941474  
0.4243649565839064 0.2783763383679196 0.2241406274671063  
0.9843829652351876 0.7778511790878914 0.9879416987199106  
0.9121589054227522 0.0243875306944487 0.4861662679519482  
0.9146907230852735 0.2769724441009301 0.4876410581497151  
0.9795432094737363 0.5259494777219720 0.9900960553742778  
0.4127542517465492 0.0254379214958644 0.2234478213525432  
0.4881040810893999 0.7674087949403011 0.6949312852348447  
0.3900125149922625 0.4426780548894084 0.6387748979820335  
0.5040230364422165 0.3656961712118416 0.1344384298502766  
0.8994939434652864 0.8637757901748772 0.0752224366774847  
0.0007906852655094 0.9412715736146914 0.5721332093564152  
0.0022972472974389 0.3624354813285939 0.5711028983770513  
0.8934501376019485 0.4407762950049173 0.0748605425382635  
0.4967848963653967 0.9376662750311304 0.1399487938789492  
0.3954271297228638 0.8565599304430214 0.6280055485898319  
0.4812012013759895 0.3777867671690629 0.7395745300065470  
0.4056007578425896 0.4101256510988793 0.2526872109876608  
0.9909140024275271 0.9091436044324239 0.9471414990023022  
0.9090411774661835 0.8935417988499859 0.4460264254783188  
0.9074536022975030 0.4080676896991585 0.4487415545452492  
0.9866664237078655 0.3942363877018468 0.9494484952756947  
0.3979946027901128 0.8934199869636460 0.2555617053308911  
0.4889372917916806 0.8933946905012481 0.7584650829372688  
0.2968209982333789 0.5328978648421899 0.6970310911000490  
0.5938283280576592 0.2758483715520873 0.2011238298994856  
0.8161704532587191 0.7769872595537451 0.9909517151647751  
0.0883915521770656 0.0255459927024378 0.4917145087685512  
0.0910297174577532 0.2741737894375731 0.5028810689581642  
0.8055712187389311 0.5292732473452331 0.0021307299138208  
0.5838860761123311 0.0267797930011381 0.2114158650287533  
0.2988365023463789 0.7908538018573669 0.7328670089738252  
0.2688861277272223 0.4400909141664268 0.5590593365010734  
0.6260534662526444 0.3640216780050424 0.0587525811487314  
0.7755810154774645 0.8535524770509246 0.1436945816413126  
0.1238217956404906 0.9496184821895051 0.6467508098967349  
0.1246912320589656 0.3586799173112074 0.6486936286669351  
0.7709297549653458 0.4462672072921959 0.1500987974506732  
0.6149926083595084 0.9530467809433342 0.0518927573175133  
0.2696338947811418 0.8573955344445672 0.5668829683177501  
0.3345901768645120 0.4729690840086517 0.3951636384612928  
0.5601400178712698 0.3388270255590519 0.8908853070905106  
0.8356338948467875 0.8246480507397197 0.3159887789436141  
0.0678863692571802 0.9771045070806202 0.8220402490500753  
0.0607403517344605 0.3279168612245338 0.8155794448810179  
0.8350511549026575 0.4768613388000306 0.3174509055975704  
0.5672774013786696 0.9717002593875793 0.8672312955399486  
0.3360470707389022 0.8266547591523079 0.4011529533628810  
0.2612383289110108 0.3613285127663288 0.3953366566120806  
0.6332153862323169 0.4498958831714112 0.9034464865067576  
0.7716576372163381 0.9414291249606345 0.2973811399290099  
0.1309073960063642 0.8598321124417843 0.7966392864154914  
0.1279327049122589 0.4432877136101461 0.8056901570223637  
0.7687264466094937 0.3604635603868014 0.3063090201664753  
0.6337389059091988 0.8584391002270484 0.9104950298724738  
0.2708449460948076 0.9433588102144942 0.4106472303069375  
0.3986029609466765 0.5461182341201241 0.2689720055802529  
0.5044953785869321 0.2495810645429398 0.7710133920186016  
0.9096058635347022 0.758245677723637 0.4436021770661918

0.9895906412503356 0.0451181916295566 0.9418659375719600  
0.9938652569061550 0.2586924487168683 0.9468107037156590  
0.9054919498933687 0.5436207093416201 0.4487814073799791  
0.4745667780043293 0.0287057275179990 0.7577192149399093  
0.3968859994479805 0.7568295810818493 0.2648977613804540  
0.7043331181338106 0.2433394743604271 0.3057163001623480  
0.1783099116494450 0.5676594394281048 0.8158014265060105  
0.1991675788445973 0.0546993374698659 0.3869749541977954  
0.6983149298125124 0.7422286302026130 0.9128465977049938  
0.6912762986029212 0.5703909772655931 0.9152870783369003  
0.2061485745220937 0.2404540710112994 0.4126249893860507  
0.1893873657424240 0.7398454652307972 0.8143143010047398  
0.6988300782630545 0.0530728062405470 0.3064954100391071  
0.5896667223154569 0.2475916926199277 0.3985000578285910  
0.3031880971043878 0.5472744162714074 0.9135004111882334  
0.0851449118033508 0.0612032243433006 0.2970547287344007  
0.8027706182297331 0.7505096908688852 0.7945660563341864  
0.7949931596672541 0.5466897167786862 0.8019455011668406  
0.0953380078554314 0.2499473133825776 0.3052446499350928  
0.3012231266957784 0.7378133342991949 0.9166233617141530  
0.5879211471096895 0.0608662769758893 0.4069244044791228  
0.6129759501237083 0.1512942848350386 0.2619238244688027  
0.2851794576667729 0.6559226898650496 0.7594957613184381  
0.1119959136990893 0.1506324657118430 0.4408930116644408  
0.7945416616123779 0.6520107420916319 0.9318231913739181  
0.5282832961460789 0.2591743596637852 0.5730662198037818  
0.3752539498016347 0.5253353658818546 0.0771922629585856  
0.0170942237851260 0.0278470044056497 0.1343808218321330  
0.8812919252582824 0.7746065818854995 0.6366493752363021  
0.8745971032871063 0.5332792409614023 0.6416959081591408  
0.0226092449372183 0.2702122935233502 0.1403239612983115  
0.3737505642858864 0.7725603566686329 0.0734899621805748  
0.5156969877978037 0.0264644970264775 0.5686066128270901  
0.4574714361428359 0.2357693714753430 0.4079074494169342  
0.4342711415132571 0.5671742585177958 0.9122483409705621  
0.9537672040521742 0.0606034298135253 0.3031198792183988  
0.9324947669426740 0.7359147217904654 0.8126627179100449  
0.9215219481245843 0.5716808158669390 0.8219216695716381  
0.9638144303368044 0.2355877870886859 0.3112361271225627  
0.4327259950562797 0.7508912477715955 0.8969101285139871  
0.4567162600405224 0.0672992032658949 0.4020075252652584  
0.4976797225184575 0.1425353295485196 0.6593265833776250  
0.3945326041759936 0.6499724730824594 0.1500484234687048  
0.0000939680850126 0.1508111797550590 0.0613372181375467  
0.8938107424629435 0.6526279061159856 0.5605371390096605  
0.4058711739566296 0.2391098224223343 0.6360530490637795  
0.4959400441428647 0.5632936601881263 0.1353666622637316  
0.8973992135022039 0.0681951450258057 0.0826448775656247  
0.0007362506708065 0.7304546952815778 0.5829656729184407  
0.9968622221439593 0.5712638444306276 0.5877253193113161  
0.8997585779663113 0.2382569020806505 0.0833674691515389  
0.4953572775187526 0.7361331501862172 0.1322561257173903  
0.3927621670560956 0.0669620478285602 0.6132179485292792  
0.2982795337093079 0.1612889642252473 0.6251723302752130  
0.5966229581824665 0.6499341216651339 0.1427470247218716  
0.7963675912618932 0.1546400095178696 0.0700708264197720  
0.1057535795960371 0.6480905422782923 0.5654785478311185  
0.2967305747743694 0.2834927642651986 0.5466690716828732  
0.6121252257810675 0.5276023830148148 0.0618586486726548  
0.7806175239408816 0.0333614970238584 0.15328737471681071  
0.1178270149707302 0.7691358098198403 0.6515130148372219  
0.1128027384641680 0.5262792662232199 0.6515803031657577  
0.7836312253416606 0.2762073746754816 0.1535062771315842  
0.6116538663938105 0.7709369917824408 0.0556073922415090  
0.2724233008923570 0.0394434186185639 0.5504215625947609  
0.3303487799831238 0.2497891484356794 0.3585348152639429  
0.5642839740959104 0.5655093156202313 0.8824152832685438  
0.8257556331764659 0.0597004313719412 0.3407230247233639  
0.0612168310767138 0.7483055682019646 0.8306565280705832  
0.0489260165563678 0.5495007772612213 0.8222965487308563  
0.8332757188202528 0.2451976936470135 0.3350070574760254  
0.5728470693234202 0.7418904581066365 0.8659956562361579  
0.3278475379283755 0.0609778721344241 0.3691607141356313  
0.4010923081034986 0.1527188460858256 0.2751229595025609  
0.4887680458722585 0.6441951725295075 0.7701426803028372  
0.9013183420073668 0.1504420637491523 0.4304582013484992  
0.9984057817077284 0.6513112231145616 0.9305923254572599  
0.4142369447147084 0.5844370203081044 0.6023649112235763  
0.3742338306921621 0.7094868315115013 0.6051483903523919  
0.4679345062723986 0.6803675994659897 0.4544828781868930  
0.2586920960111104 0.6222770769438944 0.5167688521497545  
0.5702148161026166 0.6705233090500849 0.6001131534553507  
0.3419983842196596 0.6524357212047808 0.3754133039899868  
0.6260342585213139 0.4716610349905464 0.3105629569658598  
0.2697750513445261 0.3340562992796997 0.8052944842851089  
0.1267529622428571 0.8284147086635800 0.4040475026569173  
0.7737132009022540 0.9748799691480083 0.9032318253526492  
0.7700363460205631 0.3322780662428809 0.9022495975919976  
0.1247126941055341 0.4724569559231855 0.4018014917014021  
0.2760812633432658 0.9838126090684733 0.7988914754121965  
0.6270248250185144 0.8307919218463449 0.2990819552735807  
0.5230934289843805 0.4345123050393611 0.4613607906974777

0.3749210097169565 0.3635579424824913 0.9556168609130019  
 0.0270119306328643 0.8669140187517516 0.2493180199415781  
 0.8747908004091952 0.9361996632164549 0.7492426153069089  
 0.8726933726378732 0.3671980126242758 0.7511439918679069  
 0.0239892059712565 0.4352437797301719 0.2507017442215960  
 0.3691860539010358 0.9364822360742688 0.9583086216492736  
 0.5251340031254507 0.8702712072271135 0.4476591796806067  
 0.4665368618849496 0.4465639155996561 0.6770703868775183  
 0.4281439373719083 0.3523557738150562 0.1723541459568855  
 0.9750399945763103 0.8534163164225359 0.0333247638364998  
 0.9245803894009146 0.9494958095238778 0.5320759794267197  
 0.9257871153388572 0.3521701162536293 0.5335796352133131  
 0.9695723607582956 0.4502834374099373 0.0346543533456826  
 0.4202719588147718 0.9508388014829052 0.1746861539408267  
 0.4719857992238998 0.8448010543907214 0.6630626379514791  
 0.3116075853908780 0.4558044203296329 0.6604245238814646  
 0.5821386230789014 0.3523442586594492 0.1594979291399099  
 0.8222827011140360 0.8508384387334759 0.0440022807456006  
 0.0789142045389324 0.9524996659888184 0.5454891713140173  
 0.0807658205338121 0.3500996191026677 0.5473515564143271  
 0.8154859488986679 0.4538395805253154 0.0486760747980165  
 0.5752812144803188 0.9532256349996787 0.1579255088818566  
 0.3184924081339925 0.8555009654280269 0.6648015874086889  
 0.2673026773357471 0.4384341935879568 0.4371001941333559  
 0.6270467394343333 0.3706782509775194 0.9363598387697267  
 0.7727714658544018 0.8621246392610888 0.2655861467897918  
 0.1296821080486000 0.9397753240312188 0.7682726445033192  
 0.1257687824740168 0.3647966054442354 0.7712095052768481  
 0.7704873563135226 0.4394899851443967 0.2724229194025783  
 0.6269176074215841 0.9386626458093866 0.9323437157249536  
 0.2708891965165289 0.8645322256831646 0.4448717109908396  
 0.4014547264940559 0.4735374338646124 0.3290653814253099  
 0.4944225287915809 0.3221688590943184 0.8264281257830632  
 0.9050774434609932 0.8263498224871875 0.3762382971397402  
 0.9965243571316618 0.9761165101607462 0.8768643773595746  
 0.9930447581255630 0.3270669478846048 0.8797862236007707  
 0.9035081094448385 0.4758962284890447 0.3803512212405774  
 0.4930105699353293 0.9625954595396863 0.8238635034322966  
 0.4000321846552146 0.8280708359275797 0.3282380866962218  
 0.6254200186707796 0.2299762225596474 0.2915315793625344  
 0.1217886127743024 0.0729169584995335 0.4051125738065360  
 0.7770339783433570 0.7306243838338178 0.9082169606863834  
 0.7715217643347561 0.5744069725513176 0.9130595929994987  
 0.1265310206377475 0.2293857607188783 0.4150403699932868  
 0.2692051260171426 0.7317569931876141 0.8042552663970187  
 0.6213835507046139 0.0728703286492269 0.2958844651470325  
 0.5225121722933845 0.2742915034624090 0.4529010924773916  
 0.3728389455675253 0.5206100640951775 0.9535611915995831  
 0.0188139645462072 0.0236461724047176 0.2567087712717030  
 0.8745149950627010 0.7797316967336766 0.7586682410867580  
 0.8685521617226597 0.5241340019465703 0.7632108651220101  
 0.0248272959309892 0.2780452821811193 0.2622579785792364  
 0.3677973498690312 0.7792512295791988 0.9507074398258295  
 0.5196721921036178 0.0259926578046145 0.4462396166407392  
 0.4833063191201824 0.2227982870479807 0.6597831496557627  
 0.4172101628699210 0.5713217714167256 0.1545470103495466  
 0.9754386217208008 0.0732954533667987 0.0541859449009804  
 0.9219932856111070 0.7290314845212992 0.5556997745497237  
 0.9183723620164523 0.5748123687984075 0.5596081250246582  
 0.9782500855116040 0.2293669492189201 0.0579343229412998  
 0.4166564486393928 0.7289319500168020 0.1523318620253417  
 0.4696406979632999 0.0664262155840751 0.6501745111243824  
 0.3255886882486674 0.2379875720213852 0.6390108154762195  
 0.5755440497825142 0.5709078491651095 0.1496650167830295  
 0.8182930914326455 0.0756730672547234 0.0651180843164540  
 0.0799602783072839 0.7267406149776245 0.5638761651641049  
 0.0759647543099610 0.5705699156302236 0.5656366463452113  
 0.8202611098596065 0.2330521672434984 0.0651112375191116  
 0.5753438621828076 0.7292644265635140 0.1444309171371817  
 0.3145813897474176 0.0811848244585011 0.6345693042026304  
 0.2736774673175143 0.2832971950998471 0.4288555849736401  
 0.6246420299446720 0.5278919841967445 0.9399561565827268  
 0.7697133178053125 0.0219000547987341 0.2739445213087164  
 0.1246870536005536 0.7796065593657227 0.7735902135648849  
 0.1184205197785580 0.5226001858870448 0.7757781550773575  
 0.7727951151916916 0.2811520052743250 0.2752775413433806  
 0.6272332116455203 0.7778968929350777 0.9344519527228352  
 0.2681861641655400 0.0244432078886339 0.4297156826476575  
 0.4032463772601040 0.2297415156246684 0.3170802272639336  
 0.4921768084378882 0.5711248879931308 0.8273043025472179  
 0.8981874363334175 0.0730672503611605 0.3900303636668115  
 0.9942025607783326 0.7288128980922461 0.8909316577816614  
 0.9879898248118872 0.5741163500125903 0.8916479421287195  
 0.9028920057151104 0.2280708573602075 0.3909510849092274  
 0.3991388691617254 0.0757658059271613 0.3173464264248411

Structure TS reaction 25→29 S=10/2

1.0000000000000000  
 20.1473052208878016 0.0000000000000000 0.0000000000000000  
 0.0000000000000000 19.7681594983396991 0.0000000000000000  
 0.0000000000000000 0.0000000000000000 13.2309279702280005  
 Al C Fe H O Si

2 1 2 10 198 94  
Selective dynamics  
Direct

0.2670271301533305 0.5721764658617872 0.7980716495451858 F F F  
0.4955444409801260 0.7274085691123631 0.8133817165762451 F F F  
0.6128501008206775 0.6535906992204968 0.4141232178036418 T T T  
0.3320942110274633 0.6305250271518966 0.6105086952165593 T T T  
0.4576019040944977 0.6763519495159541 0.5783449442179727 T T T  
0.1898103651115345 0.6521993585289992 0.5829464604169654 T T T  
0.2371889912921274 0.6611291927867771 0.4886184257473049 T T T  
0.5460618483795082 0.6400884578269203 0.6851253130877554 T T T  
0.5878828223722686 0.6811169086749473 0.6026829243336664 T T T  
0.3286181573124727 0.5717406905817149 0.4100106611712828 T T T  
0.3592264367941539 0.6453268768501187 0.4084016942024203 T T T  
0.6110180697544162 0.6070563128302354 0.4576275553470302 T T T  
0.6275102842403654 0.7009291865642082 0.4496027622400418 T T T  
0.4839961236453816 0.6303143063449710 0.4191524287261593 T T T  
0.6065716028825867 0.6528385019234839 0.3330273525344093 T T T  
0.7048975556107209 0.4787879044283656 0.3165244470175992 F F F  
0.1916019746873090 0.3279058489370428 0.8140999141220604 F F F  
0.2076306846376070 0.8239576701211249 0.3979016238669288 F F F  
0.6943014231340641 0.9760507415902069 0.8911623962542663 F F F  
0.6906051003325331 0.3259731618051305 0.8928343003653225 F F F  
0.2047282814441260 0.4814859246691370 0.3945864438866593 F F F  
0.1993429971366183 0.9720658702897680 0.8106876037901927 F F F  
0.7069896273162044 0.8219115388787444 0.3062556163938339 F F F  
0.5942847100669013 0.4633591704833151 0.4221400068581360 F F F  
0.3042369883427440 0.3389162662961311 0.9139556070032384 F F F  
0.0969076351451932 0.8350670431849281 0.2923189377353665 F F F  
0.8085734570769603 0.9727911486783185 0.7914295306981742 F F F  
0.8018580559212722 0.3366686619200863 0.7887285700415703 F F F  
0.0946584275737905 0.4662247702551241 0.2891235610047787 F F F  
0.3141974847252982 0.9829813118412289 0.9062868570480447 F F F  
0.5978338172598114 0.8401222516809881 0.4101363618290037 F F F  
0.5933111280251069 0.5388643011998155 0.2566325603188488 F F F  
0.3006253408329442 0.2724479134011446 0.7396529400463550 F F F  
0.1004035339225950 0.7587083407248301 0.4582217877323345 F F F  
0.7959372728196143 0.0454683073960211 0.9589282292515975 F F F  
0.8005115476266624 0.2633198183525352 0.9569239366917230 F F F  
0.0927822796547559 0.5396420953069381 0.4569501959686590 F F F  
0.2918024716814003 0.0555491914100088 0.7423606231012769 F F F  
0.5953224308800458 0.7609534398531679 0.2500601748326403 F F F  
0.6062813912919935 0.4047098399852302 0.2441655064291695 F F F  
0.2871983815144716 0.4076180900495956 0.7445317603306663 F F F  
0.1058944094833620 0.8937319726179851 0.4712975594733777 F F F  
0.7987024859291978 0.9102439579588690 0.9653658375911576 F F F  
0.7907599346270402 0.3978201713441578 0.9650397624639453 F F F  
0.1074745744318051 0.4050328223843138 0.4660892201137585 F F F  
0.3099206828244760 0.9238100065849508 0.7253313008820044 F F F  
0.6093435752789347 0.8940082194868282 0.2253666101852403 F F F  
0.5200992316223392 0.4450798901286745 0.5825753203206929 F F F  
0.3771359841066726 0.3542086830420672 0.0769247612167021 F F F  
0.0242223923176539 0.8606279728488246 0.1309115355153097 F F F  
0.8761280635239856 0.9404856475579990 0.6286097612672350 F F F  
0.8762770036623309 0.3608882822346331 0.6294019572113214 F F F  
0.0186610139439409 0.4422299638451364 0.1306876596693129 F F F  
0.3706419478356153 0.9437155849919634 0.0778735497328000 F F F  
0.5230212590903776 0.8647445598730314 0.5680601132799055 F F F  
0.5166797163393611 0.3530559030108762 0.4336128683134746 F F F  
0.3926680908453122 0.4402599541880221 0.9227422113607560 F F F  
0.0184392248939886 0.9436508979797722 0.2911792265537230 F F F  
0.8808399183323630 0.8595222942004810 0.7904936051396945 F F F  
0.8818539729106476 0.4446034534994325 0.7884597254450725 F F F  
0.0155890140211170 0.3583148666185778 0.2903957275689919 F F F  
0.3537623229174471 0.8575372858731853 0.9243180168257084 F F F  
0.5187640457718672 0.9473428972513034 0.4063641826056497 F F F  
0.4638775114094642 0.4725114586336545 0.4062774008534760 F F F  
0.4334878042655745 0.3142773534109153 0.9050494787288983 F F F  
0.9667731683016640 0.8218053593053725 0.3032969628553062 F F F  
0.9411523221415763 0.9769337217677503 0.7941966610797877 F F F  
0.9323293520309548 0.3226525662458428 0.8021769645895773 F F F  
0.9649127425982940 0.4804741382857927 0.3056786369878992 F F F  
0.4443543701951427 0.9550629935436277 0.9171385517263744 F F F  
0.4673368406235952 0.8266699952079009 0.3948959733202955 F F F  
0.4878071189484956 0.5077671461760076 0.7493402464462662 F F F  
0.4262820271495116 0.2759997847275528 0.2205294544221132 F F F  
0.9798528624761147 0.7783384290644335 0.9895244832086121 F F F  
0.9154940868028163 0.0253415832305564 0.4877933831141092 F F F  
0.9144871620809596 0.2767526274664434 0.4868139118075021 F F F  
0.9749547692319993 0.5255009313942978 0.9895783184392855 F F F  
0.4137074500978812 0.0239557474061982 0.2198935181494335 F F F  
0.4891362612380235 0.7631156184896852 0.6885662300424684 F F F  
0.3929254732247074 0.4445359831171132 0.6353459410414786 F F F  
0.5035176236850489 0.3668040168363120 0.1330564035010795 F F F  
0.8973386326910955 0.8646415007252983 0.0789425370349832 F F F  
0.0022250271943278 0.9403526609445763 0.5725846511096080 F F F  
0.0019304799127724 0.3623905354093537 0.5694860000362780 F F F  
0.8918823256817916 0.4393384648638445 0.0775164084350664 F F F  
0.4976083827916824 0.9354473092546485 0.1382061387258204 F F F  
0.3977602597181331 0.8541479541439685 0.6251853311669464 F F F  
0.4792856116636628 0.3756623591842967 0.7396767042098276 F F F  
0.4048922967905284 0.4060631795877825 0.2549914846702350 F F F

0.9901626617679966 0.9097212910687276 0.9523402293465537 F F F  
0.9083352374454208 0.8940803919671509 0.4483646443223108 F F F  
0.9058121983717484 0.4082704986118770 0.4496787776337712 F F F  
0.9859708407828194 0.3935492428274472 0.9526218038449485 F F F  
0.3987260180307857 0.8923536670486030 0.2549382671888267 F F F  
0.4910114118420879 0.8879964321293485 0.7585747490564358 F F F  
0.2979578166091130 0.5343948979084701 0.6831408031556023 F F F  
0.5920708345038364 0.2760177399027697 0.2001482151853295 F F F  
0.8132488417642563 0.7776884904859926 0.9959236617326539 F F F  
0.0909063206405207 0.0261281993621338 0.4975024173509155 F F F  
0.0922947414900079 0.2744410526647130 0.5045452754912105 F F F  
0.8044703212320599 0.5280649970371840 0.0044261326111013 F F F  
0.5843364957458022 0.0250461313581525 0.2094823640847991 F F F  
0.3013060105786067 0.7892625044171524 0.7287552226920511 F F F  
0.2730410342140885 0.4370553685294922 0.5526620862509901 F F F  
0.6257487795078944 0.3630441630386585 0.0577467565470968 F F F  
0.7716873539596349 0.8595249146292616 0.1418798777265309 F F F  
0.1246037171217580 0.9464996336724951 0.6498013812791115 F F F  
0.1233433836875264 0.3600926939147584 0.6501391735242663 F F F  
0.7676965217873715 0.4424952235461959 0.1479534810057359 F F F  
0.6147824677280056 0.9536917473964692 0.0481618327683577 F F F  
0.2720554690939920 0.8560253351671747 0.5640904509255336 F F F  
0.3335625090931060 0.4779751104079466 0.3867106607302091 F F F  
0.5612340121087414 0.3385037566119351 0.8884111544082600 F F F  
0.8365756359848859 0.8315719191286561 0.3086255796481936 F F F  
0.0706629274962012 0.9732937841254525 0.8267080947134104 F F F  
0.0621436532357791 0.3286900125957999 0.8196003383215995 F F F  
0.8345985103215909 0.4721697634856383 0.3114467284669686 F F F  
0.5684070733347326 0.97091238858289388 0.8617289378131048 F F F  
0.3361277492653727 0.8241660447620447 0.3969266285933060 F F F  
0.2658295459042463 0.3615088375655517 0.3875115582495070 F F F  
0.6360415510269135 0.4483775641356615 0.9029091566247871 F F F  
0.7635244749744317 0.9428465474970551 0.3008711216933193 F F F  
0.1343029835283573 0.8566787563169811 0.8003578508852627 F F F  
0.1273806742391557 0.4448520012704620 0.8072136931105689 F F F  
0.7632309423928731 0.3588955571365418 0.3071059117860173 F F F  
0.6344321042513599 0.8580009950284406 0.9093567085569276 F F F  
0.2719315520865493 0.9424316828220256 0.4087133751209109 F F F  
0.4075240817309265 0.5434351809670233 0.2651858253628134 F F F  
0.5054576967974427 0.2482096813656796 0.7703560870577206 F F F  
0.8977889437342910 0.7588861148400596 0.4418358254140458 F F F  
0.9937921906626030 0.0453750352077904 0.9424690822734050 F F F  
0.9938313159926651 0.2580239199278296 0.9470190678918868 F F F  
0.8968558246812321 0.5437944729980941 0.4452201303569296 F F F  
0.4717948781824646 0.0230263702805615 0.7535129030653422 F F F  
0.4014917820671613 0.7557899683121008 0.2615629742304293 F F F  
0.7030043962264685 0.2396810992216203 0.3013342382800133 F F F  
0.1823552938901969 0.5679755155961033 0.8033547534720071 F F F  
0.1978555225922278 0.0520071666435555 0.3827043394378720 F F F  
0.6983308824778760 0.7415828077783075 0.9071109517071321 F F F  
0.6922900859609769 0.5697150722869395 0.9113117457470210 F F F  
0.2061665084003010 0.2431718328529087 0.4094189330609836 F F F  
0.1907788548248703 0.7344522880030766 0.7997395869358286 F F F  
0.6981142543607959 0.0586825615865720 0.3039115837548252 F F F  
0.5893959499290276 0.2446845372826587 0.3969179512697210 F F F  
0.3042553608170167 0.5406166073259797 0.9047080601767945 F F F  
0.0808379879423597 0.0617868996404241 0.3028840833577533 F F F  
0.8068932241148445 0.7481393181004208 0.7997307277036398 F F F  
0.7986872358114141 0.5494332256812342 0.8047502197890708 F F F  
0.0934496462880787 0.2495092762142264 0.3071355352011267 F F F  
0.2981910277445579 0.7381830754533993 0.9138140451348420 F F F  
0.5863765850682654 0.0622917389615196 0.4038033599307838 F F F  
0.6085809345115365 0.1509982398984917 0.2556475397991420 F F F  
0.2930461541394251 0.6542630346447851 0.7580785131100640 F F F  
0.1150578900069803 0.1508080164962067 0.4426155840700474 F F F  
0.7943363752906905 0.6519974093680290 0.9388443311144385 F F F  
0.5286496132827807 0.2553834108733994 0.5718075601617301 F F F  
0.3744439558885517 0.5254948210820913 0.0745254864115736 F F F  
0.0173768561707064 0.0274585541191286 0.1359852810203179 F F F  
0.8777263555267467 0.7749469906615900 0.6368183727362720 F F F  
0.8714521775167512 0.5319663452216403 0.6395603087193393 F F F  
0.0232037099346201 0.2709883484640443 0.1402953289242461 F F F  
0.3745683517411109 0.7696059434005633 0.0690333273293007 F F F  
0.5156664177674415 0.0264347972422883 0.5663466030764681 F F F  
0.4567920090882183 0.2353901351825272 0.4064870648660701 F F F  
0.4338600496124698 0.5667694371303185 0.9097860183748239 F F F  
0.9494118431481908 0.0583873086523496 0.3001498128416742 F F F  
0.9385283710468357 0.7394261298909939 0.8062406917214702 F F F  
0.9274594348577310 0.5696278484437443 0.8126713354499984 F F F  
0.9616226196298072 0.2369121616181431 0.3087890525225845 F F F  
0.4292368145083074 0.7497354028484580 0.8871377286400062 F F F  
0.4547467563994587 0.0646029631464060 0.4007362085227584 F F F  
0.4970329371342643 0.1400922177836179 0.6631660464439975 F F F  
0.3974084795495045 0.6485394382147476 0.1474905994047049 F F F  
0.0012324411846265 0.1508293268677789 0.0633312483421733 F F F  
0.8871411561491271 0.6524226655871956 0.5589621953120201 F F F  
0.4065421903642843 0.2377683505450960 0.6354632848528183 F F F  
0.4977786662267221 0.5615906042960290 0.1228566126029946 F F F  
0.8985551841405695 0.0676926417596491 0.0780882772528386 F F F  
0.9941044017038223 0.7307680788868396 0.5714530668386359 F F F  
0.9913097718354607 0.5711632342049811 0.5784776963300544 F F F  
0.9004965041949120 0.2380431040056266 0.0846219015134437 F F F



0.4967659311516215 0.7357732989608365 0.1232601194898848 F F F  
0.3922887202399821 0.0672092917064546 0.6100286761344051 F F F  
0.2978853711676237 0.1618745073007517 0.6241735437157772 F F F  
0.5972790680419635 0.6490959391615334 0.1419928431591373 F F F  
0.7972381040797600 0.1544663601095522 0.0741005211977992 F F F  
0.0990388586917135 0.6488402376514983 0.571735249101459 F F F  
0.2994360948129113 0.2831103254515739 0.5408035822169950 F F F  
0.6175842874926545 0.5266655734917336 0.0625756474775798 F F F  
0.7844414404661677 0.0331284045212215 0.1579053222607740 F F F  
0.1060287008797118 0.7705501970672515 0.6562319389425824 F F F  
0.1039940329137465 0.5258847688120696 0.6542934016174584 F F F  
0.7843771271609228 0.2769246035983173 0.1537149745747257 F F F  
0.6161341066310797 0.7698361380723000 0.0554655900069108 F F F  
0.2721933650388948 0.0411051899354931 0.5453312106288308 F F F  
0.3303154115790718 0.2474940214925994 0.3523426076420932 F F F  
0.5645620991603622 0.5621116032263842 0.8865850939993578 F F F  
0.8232873958283093 0.0575232163325126 0.3494652580452993 F F F  
0.0660392745970313 0.7457585210955813 0.8453921247157510 F F F  
0.0552788924530532 0.5545555347683688 0.8360033249753158 F F F  
0.8312256343572031 0.2453049769839879 0.3366289549749268 F F F  
0.5708993551319921 0.7429549703187632 0.8689231207596393 F F F  
0.3264268536306858 0.0603771045389863 0.3623120967623308 F F F  
0.4028723966095953 0.1509938686829173 0.2721036250351219 F F F  
0.4932407216243675 0.6425630229454882 0.7735136458823320 F F F  
0.9014342781049436 0.1504634278087167 0.4287683407430478 F F F  
0.9921762357890458 0.6519933527899084 0.9345515476571364 F F F  
0.4188999421464127 0.5942482440103224 0.6076824854466820 T T T  
0.3770299195366367 0.7127070345397918 0.5766638622126090 T T T  
0.4839200245576450 0.6773900806469322 0.4424682263111323 T T T  
0.2357435287908385 0.6626535212691372 0.5624240539898184 T T T  
0.5557686548260321 0.6446784081735958 0.6106788590095092 T T T  
0.3241690989282087 0.6175899882798315 0.4385530256040653 T T T  
0.6248619773301129 0.4716477439942537 0.3087386932284986 F F F  
0.2711115131099717 0.3365266986462387 0.8019441711098452 F F F  
0.1274138168508117 0.8282944035119186 0.4057347403306721 F F F  
0.7739452630372128 0.9759454835969947 0.9026600433238059 F F F  
0.7707547927326104 0.3305100522774822 0.9020056310242452 F F F  
0.1246521736474620 0.4730770663203430 0.4028879365477565 F F F  
0.2784104148015345 0.9827080578233449 0.7961158137861517 F F F  
0.6271007670261923 0.8296841894414371 0.2962869250663189 F F F  
0.5239561654170544 0.4325962459451276 0.4623892477401057 F F F  
0.3768331316545357 0.3624934113737055 0.9548564490306433 F F F  
0.0263307307424014 0.8656328909045072 0.2529225545047282 F F F  
0.8764938505376563 0.9374737718463919 0.7509195898479035 F F F  
0.8731004444266119 0.3664233679428150 0.7512612102937410 F F F  
0.0231781144500118 0.4364151467025081 0.2523468195565428 F F F  
0.3707292395257085 0.9344011018409049 0.9563064584703724 F F F  
0.5262326214639614 0.8697989714799306 0.4462474697063570 F F F  
0.4689481073234063 0.4452562796529520 0.6775799243136262 F F F  
0.4281810830355326 0.3507453744906499 0.1711180194437318 F F F  
0.9727307754913923 0.8534739464738195 0.0369800894778010 F F F  
0.9259990719351379 0.9500543098369860 0.5335387782463883 F F F  
0.9252483749024663 0.3518580207945874 0.5331567554153551 F F F  
0.9676147372820338 0.4501726252154015 0.0364112612939280 F F F  
0.4210424801558545 0.9487097561136011 0.1728755047836401 F F F  
0.4743522214127083 0.8420546394598460 0.6601291462730074 F F F  
0.3141121476442663 0.4556557609095435 0.6543613452484607 F F F  
0.5815043598257787 0.3524126775136978 0.1582398153674376 F F F  
0.8203825312805151 0.8526271072197815 0.0450795500726358 F F F  
0.0805479876903519 0.9520486816731335 0.5480141674994883 F F F  
0.0806409878997414 0.3504727833244203 0.5478958855414788 F F F  
0.8141535390399142 0.4520900206656933 0.0489782746438863 F F F  
0.5759730609446976 0.9518735717804176 0.1550299340219823 F F F  
0.3208254710873177 0.8545001620564960 0.6621325247512715 F F F  
0.2688795002564888 0.4381266157678922 0.4308156892790294 F F F  
0.6280870110350278 0.3693915167240220 0.9354614791216349 F F F  
0.7698549012536446 0.8648108120984688 0.2641436640302004 F F F  
0.1320101161784635 0.9364808944357179 0.7711173536251366 F F F  
0.1258757626543172 0.3664079272333112 0.7725542063291400 F F F  
0.7676946908212869 0.4372995936537620 0.2704051493855602 F F F  
0.6273580109841106 0.9383044708168100 0.9290478087422827 F F F  
0.2724583603242507 0.8634723383282221 0.4419959260958137 F F F  
0.4037508157910707 0.4722190282527663 0.3260282080643719 F F F  
0.4950117208093801 0.3204644925484672 0.8262648378706814 F F F  
0.9025297195243596 0.8279659578682654 0.3765462741292609 F F F  
0.9987985901553174 0.9752002653950669 0.8797532375224151 F F F  
0.9935107466633184 0.3271188482320326 0.8815610991572242 F F F  
0.9007889251068448 0.4750084267660455 0.3791785091616475 F F F  
0.4938396219553880 0.9587075494860500 0.8212078030487859 F F F  
0.4014258934803934 0.8256745224596784 0.3258791223854018 F F F  
0.6236422644980451 0.2285455592959735 0.2883334609495662 F F F  
0.1217218069780088 0.0725457833937853 0.4074213516833041 F F F  
0.7771594951914196 0.7302486027981985 0.9114621973391763 F F F  
0.7723960442584428 0.5746136626802425 0.9153699837774099 F F F  
0.1269656840913598 0.2298603480222496 0.4156075812078512 F F F  
0.2711957049269316 0.7292826645026693 0.7985996798306303 F F F  
0.6197014651564885 0.0735624610700114 0.2925465630768400 F F F  
0.5228002185479426 0.2720179484455372 0.4520805921329014 F F F  
0.3739688010998847 0.5187254493372322 0.9509517869116237 F F F  
0.0165986983107302 0.0228182513552042 0.2583254333325584 F F F  
0.8759475883100691 0.7803806164666298 0.7591898584779599 F F F  
0.8698666318603117 0.5238177794109191 0.7615888630753389 F F F

0.0239165310815395 0.2787039797551287 0.2623395399588233 F F F  
0.3664030558021452 0.7775284503333708 0.9469238189024480 F F F  
0.5193294566093272 0.0254975002535858 0.4439973853993138 F F F  
0.4837003615428515 0.2205177683438464 0.6599080361142526 F F F  
0.4197603958242908 0.5702148498597026 0.1501496540892120 F F F  
0.9771137794056557 0.0731742250362117 0.0542887902644651 F F F  
0.9145538901230665 0.7291196760532301 0.5522484913887240 F F F  
0.9122123933679376 0.5747430338189332 0.5554657416666942 F F F  
0.978806620068868 0.2292395465243970 0.0587174289874000 F F F  
0.4184494315772085 0.7276078432614526 0.1491935684272931 F F F  
0.4687692268133219 0.06438877114160745 0.6487444050716036 F F F  
0.3262999389421850 0.2383507977580805 0.6355722248368920 F F F  
0.5763722010129371 0.5699153357463089 0.1457906373591769 F F F  
0.8190582139776907 0.0755266144694104 0.0671334534292995 F F F  
0.0736753981779046 0.7279143320040689 0.5645132308946117 F F F  
0.0709170740394498 0.5705037964984214 0.5656572228981531 F F F  
0.8210301043296369 0.2327702983481217 0.0664914486304298 F F F  
0.5760627731432280 0.7285584377475374 0.1411102214113384 F F F  
0.3141226327429010 0.0815202092402600 0.6311545486443109 F F F  
0.2754430110223538 0.2832028870967775 0.4234276047427272 F F F  
0.6269573015504548 0.5262146350268679 0.9400400042705925 F F F  
0.7679637625060991 0.0231659841120901 0.2772796916127973 F F F  
0.1243367705575977 0.7769777197519829 0.7760893483082754 F F F  
0.1187532938414506 0.5241425569889699 0.7767624362785668 F F F  
0.7707742218185629 0.2799808084792090 0.2749857160325959 F F F  
0.6278817170500233 0.7775485942547391 0.9334912765807175 F F F  
0.2678810571575099 0.0237901719926086 0.4253209231043158 F F F  
0.4041503921170460 0.2279789203135323 0.3136869671858022 F F F  
0.4938244711527275 0.5697917896955929 0.8282783626884864 F F F  
0.8972855870034238 0.0724563471104176 0.3914999423398555 F F F  
0.9941977892748497 0.7293435185295394 0.8939935089741624 F F F  
0.9880402930047154 0.5747193540018856 0.8936013788943669 F F F  
0.9017096562388716 0.2282341877808207 0.3899878310305809 F F F  
0.3989838598275952 0.0739581395322872 0.3136032096728059 F F F

Structure O2/13 S=12/6

1.0000000000000000  
20.1473052208877697 0.0000000000000000 0.0000000000000000  
0.0000000000000000 19.7681594983396742 0.0000000000000000  
0.0000000000000000 0.0000000000000000 13.2309279702282054

Al C Fe H O Si  
2 1 2 14 202 94

Direct

0.2744058773689959 0.5746857493769820 0.7863542068854784  
0.5016909052332030 0.7284206119143377 0.8210223071956360  
0.1475844189339444 0.6703359641824566 0.2155239197248895  
0.3425934205122615 0.6517851636094466 0.5776922724804157  
0.4758276230927928 0.6530260805705003 0.6242651820739562  
0.4554310028625894 0.6133718797183504 0.3508590410883720  
0.4454348512059393 0.6905252625847608 0.3294460943264323  
0.5450603319696886 0.7371390058720728 0.5164778358868372  
0.5140978204715202 0.6788616331783777 0.4396964478745971  
0.2283281801200907 0.6002891907541089 0.5635350483666468  
0.2626827922400691 0.6000429993148908 0.4541037388773055  
0.6003926493824394 0.5983245845066824 0.7061038422388946  
0.6063741401734600 0.6223803563992915 0.5922590453945920  
0.3243111717418090 0.7487586364848727 0.4823228532659524  
0.2450661810053786 0.5608714331153809 0.3166755078904613  
0.2267846345598997 0.6375925065150677 0.3076886886024394  
0.1744738555963280 0.7140271566991966 0.1866417022056330  
0.1156996736316333 0.6761138509051084 0.2813344239062174  
0.1442732448117809 0.6246991508922151 0.1697948095973217  
0.7059006455594683 0.4733471248128344 0.3190694697886404  
0.1896364618367031 0.3187793223508608 0.8148526916218239  
0.2125877080395409 0.8254979490308950 0.4004108448161207  
0.6996462102450310 0.9555282079407581 0.8855637684044285  
0.6910495228097794 0.3248758670568913 0.8948722138233345  
0.2061555338930894 0.4736722580313039 0.3932160248341297  
0.2067867685794640 0.9597479067551479 0.8152523064127182  
0.7117661175121737 0.8180937389222425 0.3018002352571975  
0.5947819552759802 0.4648871593914806 0.4217446590473374  
0.3012091270073807 0.3290374025498271 0.9186933151279266  
0.1020344422965529 0.8330456504293431 0.2955541047405935  
0.8148437410082819 0.9698304186062375 0.7936869369708005  
0.8019537312326813 0.3361620024728387 0.7890585643439098  
0.0956071192375913 0.4596622383405504 0.2889543373331246  
0.3210852793611584 0.9869107746540906 0.9054631683991763  
0.6022062511985286 0.8434979493322019 0.4028046552682072  
0.5981992062279187 0.5351749803168351 0.2502711692536317  
0.2967281946894758 0.2537475032968343 0.7498782632925882  
0.1079625516158474 0.7515018416651973 0.4544837479377615  
0.7889126856068323 0.0406822298509564 0.9603017399996751  
0.8013264934001099 0.2638059352232924 0.9575029351370463  
0.0951834127797415 0.53151547129649386 0.4572323292896905  
0.2875952212920512 0.0531750167469965 0.7392816318036554  
0.5984301059270413 0.7568439963706325 0.2522100694649299  
0.6049075792646422 0.4003694084326714 0.2476062528695608  
0.2919335007455425 0.3870344008158150 0.7391362365533964  
0.1065594089353092 0.8851913867374752 0.4794074064125456  
0.8106363804558777 0.9082118478891111 0.9687560484150269  
0.7910153886898713 0.3988291796488158 0.9634599166357076  
0.1092661821582664 0.3966730535239127 0.4649672450287386

0.3224911238586609 0.9253027424617419 0.7282711654743422  
0.6147557596047852 0.8890807041554100 0.2156312731513199  
0.5218716764992755 0.4489737116921403 0.5838563870656983  
0.3753714741458020 0.3589848742660954 0.0783318268234147  
0.0331635638132561 0.8568287309994213 0.1317083052175025  
0.8821153503356668 0.9363906149149759 0.6307766396640428  
0.8762254297252542 0.3582930116957799 0.6295460401830850  
0.0162629825315973 0.4411386911718701 0.1331576100829999  
0.3777449230786611 0.9476615275191901 0.0758482379641519  
0.5308145283104226 0.8536309891595091 0.5615935286841026  
0.5141152460696159 0.3572599193202519 0.4347496730803890  
0.3705047804139267 0.4445429903597967 0.9228693364879392  
0.0222864813723416 0.9410125819337416 0.2902558994343892  
0.8844036092957530 0.8551748611580300 0.7928992176224636  
0.8827864668167281 0.4431585556485239 0.7877391980773510  
0.0116270269315224 0.3554185852334734 0.2902510440299974  
0.3500584365682878 0.8588713240515682 0.9286643673027822  
0.5141743824003490 0.9456653812620077 0.4111564677023556  
0.4651939016175732 0.4790015653744158 0.4076931149028113  
0.4311791403133439 0.3260261656773193 0.9040918764658781  
0.9709977947520072 0.8192446773836155 0.3013650123199659  
0.9474964287032275 0.9715848727853205 0.7956757558212808  
0.9327313296575543 0.3205355277995048 0.8020398991386789  
0.9666568342602117 0.4795394981890336 0.3109337822969571  
0.4491045974337699 0.9476659500189456 0.9118775728595913  
0.4728872719140784 0.8210499960432224 0.3885346483163116  
0.4703503157641762 0.5147450035984132 0.7386503395386229  
0.4158309246516921 0.2807391452265102 0.2259615964225515  
0.9922042082753840 0.7746905470528020 0.9882556755561084  
0.9209552213425646 0.0232220098198486 0.4917984529665699  
0.9139229861224184 0.2747426917352197 0.4854795725067664  
0.9756497832633715 0.5226271149617420 0.9887043369727828  
0.4206084775992865 0.0247725449605442 0.2226116925416326  
0.5021516507403331 0.7662593162502594 0.7007218234591863  
0.3960818276516857 0.4262133456747199 0.6328105783125434  
0.5027905128201794 0.3608351620130917 0.1331354808547547  
0.9069442177670191 0.8575798420187736 0.0802999184264708  
0.0092022409478534 0.9427347060654793 0.5801315261395456  
0.0015242533784682 0.3599684969511787 0.5683502375643696  
0.8888167608792322 0.4431961274241663 0.0815750900227057  
0.5045976616372446 0.9387891993384623 0.1355697348551113  
0.4074349814128717 0.8540555406991625 0.6243004032652129  
0.4954359766973764 0.3851575212735966 0.7517344898429178  
0.4104514923799798 0.4131903896032592 0.2526074834103542  
0.9982204010596732 0.9067657628005215 0.9538627297240243  
0.9202868097951220 0.8917309953931537 0.4521283324593125  
0.9044650268946075 0.4065515686764981 0.4505349022836326  
0.9785103793108845 0.3892646608286811 0.9595354181361808  
0.4062196298058403 0.8921420068500888 0.2489911050460679  
0.5029642074081884 0.8970071502917556 0.7454640686121704  
0.3118665532831230 0.5174631607118170 0.7060948793185599  
0.5903305399909772 0.2713730018585062 0.2035413552309224  
0.8211055398115460 0.7739607796029933 -0.0043658294414578  
0.1008060037602239 0.0193430059652314 0.4912333710159636  
0.0904312156006963 0.2684817317684769 0.5094841261481641  
0.7981640445131509 0.5287148062421464 0.008892405413855  
0.5928475966911714 0.0221761588461323 0.2164287224403434  
0.3060241038568221 0.7919717640628395 0.7163282965853777  
0.2731470511790764 0.4336146909773114 0.5581422118563399  
0.6263054058012718 0.3595314082544143 0.0620116854017230  
0.7808844417573769 0.8561203456889528 0.1426894157374272  
0.1330618321827967 0.9460724847137683 0.6506746245664190  
0.1218515396301157 0.3565048825268868 0.6524802304452917  
0.7644512855789936 0.4382714121786229 0.1478399388761908  
0.6226645237674667 0.9584135760722083 0.0477122525447048  
0.2825822394913603 0.8694757879929891 0.5591827768397247  
0.3342711759275269 0.4724787575619506 0.3904736610667134  
0.5615160902505413 0.3238917230608530 0.8979947603793873  
0.8411094629568018 0.8366519853270649 0.3157102752511906  
0.0776257669212464 0.9718372675727389 0.8271823977766619  
0.0615981434002274 0.3374834582443442 0.8257583235433602  
0.8362586262393300 0.4681930294831265 0.3063078562029439  
0.5728915929383829 0.9768132503095639 0.8643526122868408  
0.3419595681467373 0.8288426691903590 0.3947376875950293  
0.2685477320608191 0.3564391602002630 0.3922550153388146  
0.6261099865227530 0.4417515715087172 0.9018536447118781  
0.7602329334587958 0.9418017301056494 0.2968853412665716  
0.1313539229486479 0.8516639569555606 0.7965029975543206  
0.1419617484732356 0.4434662658921589 0.8041311676214964  
0.7657063308195546 0.3546322879923955 0.3075821208458073  
0.6136274611568855 0.8548893136369304 0.9173675152274391  
0.2730315207976680 0.9442866621555996 0.3915021880828787  
0.4033424796890561 0.5480685204554732 0.2702385568807572  
0.4940381836460028 0.2512872261546689 0.7698045408840739  
0.9021719226027697 0.7577765939272766 0.4417975427695485  
0.9994465261380913 0.0426335761857842 0.9415855750523845  
0.9966801731752241 0.2559375280517262 0.9456256080690709  
0.8917600075622852 0.5417063206415783 0.4444060061214262  
0.4747321178217858 0.0294922360834385 0.7606631355077440  
0.4023325974915632 0.7554589258122766 0.2585836899941551  
0.7022463760045621 0.2372321605549477 0.3028750829410797  
0.1885656318243362 0.5702184957908011 0.7840263468275769

0.2046638747514195 0.0589108765515336 0.3786315169745156  
0.7050975149376518 0.7604076193427457 0.9015802400606566  
0.6910132849193178 0.5589817201915404 0.8957913182011289  
0.2036458986110004 0.2401378957643009 0.4089878116667179  
0.2000267257281739 0.7361344837751074 0.7988357561430522  
0.7043419833494818 0.0629178618639485 0.3094079967713341  
0.5908495967583853 0.2501700768123098 0.4033923709856615  
0.3056318553789621 0.5637152104830576 0.9080016896126789  
0.0871555883945778 0.0571822615246338 0.2979552270407162  
0.8151366266913685 0.7404750368467503 0.8007474362252778  
0.8071942575834582 0.5531117973422710 0.8103495235401674  
0.0910534606439130 0.2479373726970618 0.3100618536513491  
0.3130240732145417 0.7327519473012011 0.8955911959049474  
0.5936438681585097 0.0527933409102734 0.4127810841695677  
0.6059427732224463 0.1485785773167209 0.2721321202047042  
0.2962585088403509 0.6560595957987112 0.7300711195518056  
0.1125278289947948 0.1468679657500945 0.4414227293100818  
0.7806499269941003 0.6521636864789960 0.9428139589171470  
0.5243058260426844 0.2610414534558569 0.5748132856524047  
0.3677657831955182 0.5277850364558745 0.0796452341331410  
0.0171798184649829 0.0252350982672187 0.1356306751152437  
0.8857338284117983 0.7722584649295090 0.6379668884219987  
0.8721394097427901 0.5317891635304560 0.6401053773307183  
0.0239785305988114 0.2678776846936622 0.1404220568182441  
0.3725869680780702 0.7678613951531278 0.0668043011956108  
0.5161744145057353 0.0252980348402570 0.5713684396198135  
0.4591302015342828 0.2377826876511632 0.4047894439153397  
0.4381380724492341 0.5593574584291330 0.9224607827978872  
0.955129790977218 0.0572396111156788 0.3043719151576022  
0.9467682846537886 0.7372842451709196 0.8067828957358878  
0.9385925428357927 0.5642323800511759 0.8057147115745888  
0.9596189277517039 0.2333966522851034 0.3067369900603673  
0.4421550669357676 0.7634089604872227 0.8970346953731961  
0.4629334684316594 0.0687481756343908 0.4008280150800319  
0.4956484274822777 0.1428086910578971 0.6586477296923837  
0.4057661775599177 0.6490414546197485 0.1414781829783309  
-0.0002834277287870 0.1482979511032181 0.0623874304321954  
0.8907340560391603 0.6511899220798547 0.5572446568578866  
0.4008125870507261 0.2352201559169380 0.6293415574259136  
0.4946548590181814 0.5492792748003363 0.1279557056789762  
0.8986897588710626 0.0616840578006485 0.0676568874660838  
0.0007239185021328 0.7269507205074778 0.5667245199887461  
0.9916080159894073 0.5657488960601968 0.5698532252653230  
0.9015637103287010 0.2380041504264302 0.0825661756243672  
0.4987298137480829 0.7448216386876418 0.1212585300188404  
0.3927167511733396 0.0638235704986392 0.6140931238146410  
0.2952613733633631 0.1550316541667682 0.6135750922380994  
0.5875145543712810 0.6457299762962421 0.1419016948311617  
0.8001475720102649 0.1520251905561391 0.0675129996230668  
0.1021706601896408 0.6410011158753436 0.5674831697972884  
0.2888683105641363 0.2799680432678162 0.5513841855712092  
0.6124755229791168 0.5292535379839067 0.0508496370396850  
0.7872053859979210 0.0338050790492760 0.1601052330324864  
0.1135162780857837 0.7624435811464041 0.6527531957808657  
0.0993674430912096 0.5197666148235826 0.6564643985577324  
0.7845007254982845 0.2716565443075444 0.1547462539104308  
0.6237316420537113 0.7615337356102925 0.0585162752761175  
0.2757641949539675 0.0320251498846038 0.5418639316643282  
0.3302823978908582 0.2392051234536278 0.3682785917648743  
0.5644416170536288 0.5579131435134477 0.8642848606152643  
0.8293454737698420 0.0498500206933259 0.3516637795834251  
0.0748853760434967 0.7349703456409794 0.8422233006609398  
0.0659931086456175 0.5483475919055868 0.8469017219541983  
0.8298861467780809 0.2390270609658028 0.3383282609081183  
0.5793039708482336 0.7268558814492891 0.8756286255398981  
0.3341049812625708 0.0615338401572500 0.3653264984359101  
0.4071338031974242 0.1527768824777973 0.2716008271275587  
0.4807455513075382 0.6437486374146479 0.7789075248034313  
0.9028101558038724 0.1473200692735252 0.4313629270811375  
0.9970799065301138 0.6473594304716237 0.9343987472480514  
0.4128570521621313 0.5924939518596120 0.5722962458980619  
0.4006370110839857 0.7140146667836439 0.6045392726019827  
0.4792175474498838 0.6566625552768914 0.3480781021476528  
0.5355607162618556 0.6889237503051614 0.5097901954517108  
0.2698271670571383 0.5884706428924273 0.5295560940901820  
0.5765011300888493 0.6027718971420127 0.6421658095207262  
0.2595365969153798 0.6060908925142988 0.3369957426947210  
0.2955578433764470 0.7105670176175181 0.4999128689535284  
-0.0257719406248113 0.6455937229307001 0.2685690114965094  
-0.0689757794548333 0.6577788406529029 0.2050996472449365  
0.625831374468029 0.4685029424389355 0.3082902680957023  
0.2699375953749317 0.3224314580874814 0.8052445817001584  
0.1324130836540394 0.8239207884048195 0.4087544927006712  
0.777825298475322 0.9686786893890139 0.9031750918552885  
0.7710798125044583 0.3305570363885079 0.9024928838543411  
0.1260821278127098 0.4650030909250000 0.4028400002374647  
0.2834301578283494 0.9806571650172250 0.7970270926458313  
0.6320278349666398 0.8269354464339834 0.2910923209407843  
0.5238808877550911 0.4366476298819918 0.4633208871592460  
0.3694921752191495 0.3654747518610773 0.9563476518056229  
0.0318408326396367 0.8628525864002523 0.2537075134781314  
0.8821043871403876 0.9331927212141281 0.7531622262467973

0.8735999004106798 0.3648662977763590 0.7512956810692396  
0.0221808786307808 0.4335716584043510 0.2543497433209187  
0.3748502845103632 0.9349455155833538 0.9549647914989894  
0.5296350707530257 0.8677920739721100 0.4417599951992656  
0.4692904401703067 0.4440814742444156 0.6768275504767125  
0.4263183851262025 0.3534176654795953 0.1724525483704975  
0.9823187983978481 0.8491241421565434 0.0370750382977919  
0.9333856945073805 0.9483439095385137 0.5379911212629207  
0.9247361882397030 0.3496193507077033 0.5326891728596096  
0.9647085076996644 0.4491291882893161 0.0395917472727570  
0.4282275867212691 0.9512707899828737 0.1705478197922380  
0.4839616352145862 0.8413847685343391 0.6606736644166850  
0.3181623647902985 0.4437197696154396 0.6599168327038608  
0.5804746003976895 0.3479690804722976 0.1611433126210569  
0.8297877771666466 0.8484168380318799 0.0463926557063666  
0.0872722026876072 0.9488618952057335 0.5501876824369655  
0.0801338997203375 0.3454773466282099 0.5499920223658977  
0.8111671359549971 0.4523847277844496 0.0504084433720284  
0.5833645675103774 0.9522226931997890 0.1539941742465468  
0.3299798850785385 0.8589174750619765 0.6575525433920403  
0.2710861033504473 0.4331122714509937 0.4366904870648730  
0.6259912197769285 0.3631823573615066 0.9392367168806003  
0.7740974242068176 0.8638675692121958 0.2641430708829123  
0.1370823525381802 0.9317204811829427 0.7715245552824521  
0.1286808560620726 0.3650925267454596 0.7742068748687907  
0.7682580724009793 0.4328974731806953 0.2702275387000292  
0.6274057790961995 0.9352181752747826 0.9297870932087835  
0.2767162651710073 0.8682972593265901 0.4371954285817906  
0.4033447335510600 0.4757945388670754 0.3300407267055682  
0.4948823562080498 0.3225767406890834 0.8302574297352050  
0.9087313086951757 0.8274429325576074 0.3784335219521486  
0.0056210175709195 0.9719683655428074 0.8803442969017113  
0.9926039940948923 0.3266531547172227 0.8837352023710835  
0.9000240216148605 0.4729463962341701 0.3792359854666559  
0.4995408766006268 0.9620582031476829 0.8193611378865504  
0.4058572474333596 0.8267506370937333 0.3209088638113666  
0.6225563300389502 0.2274116966941052 0.2954121056851541  
0.1266091885394434 0.0702718790789606 0.4033025047741879  
0.7795475807293050 0.7315013804191691 0.9108700130937035  
0.7694857230743395 0.5731239286015709 0.9149400965287816  
0.1247544108988118 0.22636244388503782 0.4174843894408491  
0.2795716534131493 0.7291884154471222 0.7836746630347933  
0.6246943517685564 0.0713119236493726 0.3019683671207253  
0.5222103175602736 0.2765841976058889 0.4543339936584776  
0.3670426203864373 0.5242618550225554 0.9554388486740609  
0.0205069420550776 0.0202020309127123 0.2576562807726264  
0.8828366377346301 0.7760918019644664 0.7602850743570472  
0.8751243843313076 0.5230937671301890 0.7619474035304661  
0.0220970855028716 0.2759595738130354 0.2624492820256021  
0.3712151597842570 0.7798858564956086 0.9443436570712336  
0.5221145556897557 0.0237689674214206 0.4491800157981853  
0.4780830017950705 0.2226286313451726 0.6580017286843148  
0.4180457046306644 0.5688069087310935 0.1528372070085796  
0.9779674643579701 0.0700350358265180 0.0517089593445480  
0.9208959418948532 0.7268510043680411 0.5510424479774921  
0.9123218850946947 0.5725748193864563 0.5530129159007688  
0.9798218386621863 0.2273342524182498 0.0572110580136770  
0.4209815489146486 0.7289619858323609 0.1440900522349150  
0.4693325301384612 0.0657911244159578 0.6517195032775848  
0.3207079946226845 0.2312150412592887 0.6376857896505128  
0.5728965846239354 0.5655771428242774 0.1431340196301118  
0.8190944342856552 0.0723613454354777 0.0636126189172966  
0.0806838574423253 0.7204049163101701 0.5606428638317057  
0.0715514129401887 0.5644936985800209 0.5638176021721936  
0.8222263207741796 0.2308466701780653 0.0650915510484844  
0.5765093070553653 0.7266234515181001 0.1425923291109795  
0.3135254529709993 0.0759348597783110 0.6282324116155098  
0.2729978159735077 0.2785153848292879 0.4306694627712852  
0.6229377523078121 0.5216574203231791 0.9297066560646620  
0.7710365318785298 0.0222159033431487 0.2788897131955769  
0.1301197563086156 0.7712899172505767 0.7724124848605763  
0.1258509196159484 0.5219933638660019 0.7741282879637847  
0.7708933680973082 0.2755123523716573 0.2758580667913078  
0.6290501630261772 0.7748731470192608 0.9366045380062987  
0.2723899642660381 0.0244818504481219 0.4195849021061366  
0.4028936301899210 0.2287302690331629 0.3178891932895923  
0.4876096102174195 0.5673278281319096 0.8277964254447290  
0.9020604420404467 0.0690722439972086 0.3946321427818356  
0.0026772322552831 0.7243539116510453 0.8931186965769312  
0.9952862233570107 0.5699732404553983 0.8932331153247949  
0.9012615512821726 0.2246075169788757 0.3905060765398684  
0.4057981489274977 0.0761112490656224 0.3147745396612084

Structure 34 S=10/2

1.0000000000000000  
20.1473052208877697 0.0000000000000000 0.0000000000000000  
0.0000000000000000 19.7681594983396742 0.0000000000000000  
0.0000000000000000 0.0000000000000000 13.2309279702280254  
Al C Fe H O Si  
2 1 2 14 202 94  
Direct  
0.2756232029571460 0.5766685785997893 0.7820565951220069

0.4989075504747133 0.7316391147824268 0.8306032926159884  
0.0858623322329769 0.6565072579189160 0.1648420008556467  
0.3516854766749561 0.6587565503807523 0.5676250975036055  
0.4830597445639265 0.6712633977952335 0.6277607721823336  
0.4530812593171718 0.6082190623708880 0.3556078936794503  
0.4454334737455951 0.6857432691766780 0.3321661941544524  
0.5671557985375696 0.7273436340239698 0.4934504534684698  
0.5178353804214360 0.6727578305554529 0.4369675806538227  
0.2873254159640407 0.5540583293939954 0.5809242256211041  
0.2579069825729531 0.5948747467476215 0.4738492610812322  
0.5998046226342986 0.6132652477644164 0.7327318272869744  
0.6126546860713507 0.6160531500260691 0.6142250952439582  
0.3201705815804186 0.7504963809489039 0.4680018200196023  
0.1665304849385254 0.6270425983927035 0.3961407384929997  
0.2294006800660243 0.6741421246122048 0.4144532475723327  
0.0373800617555117 0.6570386978124357 0.1274162391317526  
0.1079842796592902 0.7073040097713630 0.1666489112226509  
0.1196317066675005 0.6199896797314705 0.1294962103164420  
0.7065719238412982 0.4693071778249876 0.3208333647914944  
0.1911589961669807 0.3214778677684748 0.8165203740758581  
0.2117194698516120 0.8320495503804500 0.3978145863285382  
0.6957262047951641 0.9615653952797133 0.8877983629780044  
0.6935178074062951 0.3279175347756378 0.8949099515347940  
0.2069626535046880 0.4727572821186514 0.3969614554183502  
0.1999813889882636 0.9684986007744668 0.8161155126471136  
0.7087354091197836 0.8192596576088256 0.2997166094369142  
0.5945422153258348 0.4660911039651908 0.4219083005295151  
0.3035304536965111 0.3297434487632144 0.919899025934521  
0.0994972507851976 0.8302069864442829 0.2920712695109524  
0.8089068536686110 0.9658086591185848 0.7894316442792587  
0.8038705002714769 0.3367852096806047 0.7890648311358811  
0.0971331848771656 0.4598134857116215 0.2892530481486778  
0.3137855690667438 0.9868444232306176 0.9115818043389898  
0.6011993136109881 0.8356291953126201 0.4118178943753754  
0.6025905139441422 0.5347509195933150 0.2486499300576378  
0.2974627978815915 0.2560777534144028 0.7492651465273319  
0.1135260391621283 0.7518923693634491 0.4537804968427606  
0.7915384417492136 0.0404040913185501 0.9566220357816235  
0.8020240645609239 0.2627761107508725 0.9558861660851432  
0.0972325941319596 0.5352582579516835 0.4556203461811098  
0.2893258743949368 0.0553306821149879 0.7445447187967419  
0.5959229949795747 0.7540583836133009 0.2565720020833060  
0.6028613300651258 0.3997269675705454 0.2494551484505616  
0.2943685541977329 0.3899126591695011 0.7441106545699205  
0.1009590945759222 0.8853545635246466 0.4728206102424953  
0.80474344232584 0.9066046013380129 0.9667500179988225  
0.7964597214654942 0.3976392403258872 0.9658724828042775  
0.1058500887200252 0.4004598584372083 0.4672176940272474  
0.3132612601289353 0.9246697692995867 0.7333390485494642  
0.6034357148450387 0.8877188699101941 0.2285123073705260  
0.5210858804904286 0.4570076729226681 0.5849076692780937  
0.3791177220908280 0.3569491093931665 0.0771037637133903  
0.0320173857091709 0.8554938681892789 0.1277028565251591  
0.8817365787591291 0.9390168794141041 0.6296532347247169  
0.8768305833207212 0.3551713849582105 0.6279538922829184  
0.0203133490093477 0.4402175097635603 0.1310531049621346  
0.3760271208697328 0.9504276773740303 0.0790153136331122  
0.5304318694635027 0.8561416759682779 0.5693111476903870  
0.5126372064938992 0.3597177376302592 0.4446415257311579  
0.377325503486089 0.4434956607089612 0.9230038693603431  
0.0232477521359562 0.9408419711914573 0.2846685000413736  
0.8865844249882708 0.8554952274221749 0.7883503129765046  
0.8861803752926730 0.4425174836135063 0.7826443033690540  
0.0150294005658590 0.3535223173555186 0.2867561563267073  
0.3413382341023737 0.8588572024224864 0.9395919635674315  
0.5202139433291746 0.9449103121776908 0.4156529169423644  
0.4650031276200418 0.4814776533588405 0.4062932270747602  
0.4331325757827937 0.3236344856177664 0.9002051315493708  
0.9666166790909675 0.8215769064475509 0.2954383250935240  
0.9396278321389686 0.9762959061196628 0.8019720608138818  
0.9346256425330060 0.3196870248596876 0.8012257178889099  
0.9673457530895541 0.4765590383820989 0.3069252847522179  
0.4402900832405480 0.9454892848093244 0.9080473210698757  
0.4710083730069743 0.8226899392181928 0.3965565567322534  
0.4686162399989385 0.5174325668670281 0.7433586404164263  
0.4193422645796716 0.2800038196242144 0.2260413546136141  
0.9897680586183142 0.7756376935470105 0.9827937842436655  
0.9241228908877536 0.0216286882303292 0.4874887886520075  
0.9161240828647458 0.2719683140069641 0.4844459781851836  
0.9810228064005523 0.5234809853383096 0.9881590025889312  
0.4180249706828315 0.0234119463259737 0.2298986077873884  
0.4984967710307883 0.7669231137082880 0.7065657662150125  
0.3954038385211442 0.4317783175393174 0.6334734874778104  
0.5067996876373121 0.3557328657305746 0.1276414297480095  
0.9059850015830875 0.8606540876877986 0.0743688922464756  
0.0097291929532353 0.9433370009244895 0.5851335830101546  
0.0026893746465670 0.3560374918936879 0.5723959093860456  
0.8923630710235831 0.4465956473680238 0.0834604083022518  
0.5046580320807275 0.9465195021581534 0.1304345213024982  
0.4079665746585001 0.8625460315857055 0.6363731406493222  
0.4947516707768640 0.3867131680317522 0.7482165462300112  
0.4189485386483919 0.4134098293888891 0.2478215003799659

0.9993673013425486 0.9077552531715772 0.9504200647072482  
0.9239995646674929 0.8892826694121686 0.4554925131612071  
0.9083722004611821 0.4038975563128476 0.4499112772051030  
0.9781309526313241 0.3901735408682395 0.9582370525652806  
0.4126390918075223 0.8895325004029693 0.2454231475143543  
0.5087952617761269 0.8955083935902767 0.7552942787953316  
0.2992320638643681 0.5186532766735226 0.6883170899445065  
0.5994596358503956 0.2713882160887127 0.1973965967594324  
0.8214827825922356 0.7738788371236276 0.9942322772290657  
0.1010416038797184 0.0187824828841912 0.4936431643963055  
0.0958212811739509 0.2703072355364531 0.5106039663411650  
0.7995719075342199 0.5282498223996561 0.0092517117599972  
0.5948295909039345 0.0226672912073312 0.2212671484236504  
0.3080496342941862 0.7914123137127878 0.7141683953037786  
0.2733228764563076 0.4253713030830017 0.5556835904838342  
0.6303303383481194 0.3655400761987619 0.0613772673565491  
0.7816795473545833 0.8539761185758344 0.1430635325411677  
0.1364112105074679 0.9401051409552692 0.6452850302879728  
0.1240278308920393 0.3590653458105003 0.6533586135238043  
0.7677813276030687 0.4386974706892501 0.1492941824778481  
0.6289373951606656 0.9524626005585811 0.0599696371973451  
0.2854942072179609 0.8702693521001538 0.5573300069825630  
0.3364323047311412 0.4572964040180602 0.3889239807268828  
0.5634454068184459 0.3315104996804040 0.8982147165986892  
0.8374691249238487 0.8435762835364173 0.3218625263981061  
0.0704608161806549 0.9690884782865753 0.8105365973463984  
0.0631029686420537 0.3400325243154944 0.8260976186377553  
0.8366544562619106 0.4675688634110024 0.3119529232822711  
0.5671873576427343 0.9749351644931458 0.8874507318872700  
0.3401923465436371 0.8309425322611875 0.3882283011225244  
0.2585655088720426 0.3500670960570775 0.3907979323014550  
0.6318466647475230 0.4464229736119564 0.8988929910919875  
0.753315388866338 0.9437747475837686 0.2884337858663575  
0.1363776558819351 0.8523861751343051 0.7990027900545094  
0.1435513283932008 0.4461466642267495 0.8052792823958812  
0.7687749179670854 0.3523633484288327 0.3043769185928173  
0.6198975204775290 0.8539201964087855 0.9215479840751462  
0.2757365493650192 0.9487929186754256 0.3933696795851804  
0.3946215841556538 0.5455587682041479 0.2719550431541738  
0.5033851224352202 0.2531514851108671 0.7695460515891775  
0.8990690128220593 0.7574589459245628 0.4368784330153832  
0.0050334139976473 0.0434322113688800 0.9392062181061129  
0.9998323345403207 0.2572313454660526 0.9460397764612771  
0.8981096414513117 0.5394474334890560 0.4459129446478383  
0.4801288977528876 0.0287116105753626 0.7656412936096330  
0.4052392726608988 0.7542415749013596 0.2621505191601208  
0.7055128714213351 0.2352263059982279 0.3087344309044842  
0.1902929437265686 0.5732760900734304 0.7983818993455736  
0.2052892812227617 0.0624099711654483 0.3854188764172680  
0.7043522962999188 0.7522919010202457 0.9054324248027036  
0.6917062698260377 0.5662630128235394 0.9039378395144838  
0.2069725830492383 0.2287188930232503 0.4152141284116259  
0.2007240094394647 0.7350064925081550 0.7942945687255974  
0.7065401034658506 0.0672082852563745 0.3099131807187800  
0.5914857618456562 0.2567948119661074 0.3982310110377788  
0.3156326986749824 0.5615907286264705 0.8955778511493494  
0.0896471746263457 0.0555431089897787 0.2996717036693548  
0.8138184015382640 0.7436471968480864 0.7982855712381446  
0.8037591414787447 0.5468639350449954 0.8091803300045285  
0.0964351159341393 0.2483805636867911 0.3116195989305036  
0.3122246770707332 0.7323308005467637 0.8948710370597331  
0.5962914919405635 0.0543868908153979 0.4164692383917351  
0.6059975497952808 0.1501733740163347 0.2756930849695601  
0.2998407642621073 0.6570942765426687 0.7265670814065405  
0.1076026345745167 0.1462008512770568 0.4441835932302517  
0.7901113354470330 0.6510235093135940 0.9384118475786672  
0.5294629874477503 0.2573032745964686 0.5738099157701818  
0.3671645334131544 0.5283895709946784 0.0777822326960679  
0.0234737881202886 0.0287596664603475 0.1333302396068289  
0.8832907679723156 0.7710454727633462 0.6334960633693549  
0.8715186895424921 0.5347604485410608 0.6399440494035450  
0.0293384577767782 0.2629863569694744 0.1407490746160924  
0.3700731334277077 0.7646005493296159 0.0703249555038348  
0.5200789760564871 0.0257395367136741 0.5756481249265857  
0.4600085032649750 0.2400382363155232 0.4075379781260067  
0.4460924933704133 0.5583862054186183 0.9306328174317704  
0.9574125111526945 0.0571943836693731 0.2999172426524209  
0.9461656623745403 0.7363240249404788 0.8012413746063122  
0.9340967607566317 0.56569690090407814 0.8104670178843757  
0.9654344194983974 0.2304936261362366 0.3084476219413841  
0.4392248416273357 0.7711977540440949 0.9007298608179473  
0.4649332551541923 0.0665049742283695 0.4053958445810678  
0.4935713450924878 0.1425778513822973 0.6632119012429186  
0.4069409331890473 0.6477753977219771 0.1457205913208751  
0.9898376130371576 0.1484880483353522 0.0588750081214357  
0.9005390290646752 0.6505594408883190 0.5538866966188988  
0.4054934130431895 0.2422038282708885 0.6358041220648897  
0.4926320530537305 0.5452242169339492 0.1408233000188168  
0.9017704148696768 0.0483471884487608 0.0652483037161774  
0.0013650808363263 0.7387902444816111 0.5602538349016121  
0.9950913262656882 0.5575911976206407 0.5800495172690232  
0.9037641648451716 0.2497488202841455 0.0839125086261104

0.4980436769111874 0.7454442406941418 0.1201167004844274  
0.3952714626316437 0.0570460095721116 0.6199838367170294  
0.3049276304180041 0.1554042661792173 0.6172782211433260  
0.5837339735561873 0.6448018128943663 0.1421908264102586  
0.8151372812428973 0.1508916525535508 0.0612972794047613  
0.0964212989758510 0.6446783045564554 0.5682125864944784  
0.2933327007651052 0.2784703728070603 0.5496852617008109  
0.6061428451544665 0.52974250794388777 0.0478670477767833  
0.7868180510876435 0.0372970411735247 0.1571523156526054  
0.1136608274630849 0.7662265799561641 0.6512233391394310  
0.1115666806155176 0.5238533324361018 0.6530845975001287  
0.7821553284855982 0.2660739713409104 0.1526512384253577  
0.6251088524152717 0.7615322177617277 0.0650863841249253  
0.2765123514676771 0.0336740033113587 0.5477042608517484  
0.3319021757002358 0.2394162722988702 0.3650865775067265  
0.5682481623549188 0.5617183560848336 0.8566655853540284  
0.8316289275570560 0.0445692941684609 0.3481011110478482  
0.0748605047920280 0.7373596427066977 0.8393983235098131  
0.0633421953988747 0.5500135901162537 0.8357495709975624  
0.8349796236338175 0.2382761459087661 0.3323790748244499  
0.5761158976154939 0.7287649910127476 0.8851531212783574  
0.3353159151708147 0.0671401604052184 0.3736892203539420  
0.4118569118479545 0.1524109602683717 0.2752634623820787  
0.4781592271240073 0.6480410372107054 0.7867719855541401  
0.9028379793109608 0.1449163199238125 0.4278708872670269  
0.9985637148067160 0.6485417415382831 0.9311645464936791  
0.4225784458471963 0.6035688417840736 0.5888208687717463  
0.4066303186677195 0.7263236318518286 0.5792497664756089  
0.4781101278435174 0.6505573491637712 0.3496623592773954  
0.5426175853257797 0.6852758840415676 0.5031028534692349  
0.2972215550062574 0.5836549443273187 0.5208876103506127  
0.5872557637389889 0.6356970046536456 0.6694062662444757  
0.2147908140178832 0.6289579492137303 0.3914077595817857  
0.2954679086136262 0.7108093980809873 0.4915656444174261  
0.0774141025312102 0.6330427868232075 0.2688341132159703  
0.0242793690411333 0.6608786209389933 0.3126759093738602  
0.6265851109897477 0.4674838950892337 0.3087620048155766  
0.2713246068617735 0.3239318146915397 0.8071483258851598  
0.1316679355014129 0.8250933745776031 0.4048591232284860  
0.7750064914012039 0.9688376576824936 0.9011794843669488  
0.7737160079057649 0.3310848757060906 0.9027823522109524  
0.1267941643953781 0.4670767281989598 0.4033303684014301  
0.2783153885254619 0.9831202817589302 0.8012136439284655  
0.6284899179933436 0.8245881497422772 0.2965183192607491  
0.5232197009354590 0.4400530367427701 0.4651273634831471  
0.3732520108272556 0.3643505889683555 0.9554057042879930  
0.0300568003666550 0.8621266278514168 0.2497884988300691  
0.8791828631405270 0.9338930539478372 0.7517876802034946  
0.8756465464813876 0.3638409086533155 0.7495091285573925  
0.0248909115007409 0.4321525575676745 0.2525939931811762  
0.3682741931142070 0.9350730753804555 0.9592718902974947  
0.5301142199851201 0.8665063100169773 0.4488995028849511  
0.4687799452997544 0.4483629143703749 0.6780545806317293  
0.4309845335454639 0.3515693672179487 0.1699297184869978  
0.9813922991767828 0.8500459439400241 0.0324759533430224  
0.9348771106800424 0.9480247908552696 0.5386146701131802  
0.9267311915100246 0.3466736672903723 0.5326126031786810  
0.9678678913564072 0.4502430757051238 0.0391924264956109  
0.4286292947168747 0.9527920707694946 0.1710293145743951  
0.4839927490226336 0.8441125807268942 0.6679255393971979  
0.3162156304458928 0.4420863143692553 0.6566447174109232  
0.5845278222277486 0.3479976178673191 0.1585860165163049  
0.8286266173125418 0.8485413570359063 0.0443214467829144  
0.0869109421733069 0.9473443896438718 0.5493641406294846  
0.0817877398809431 0.3465782550733163 0.5515482627868455  
0.8145532764866451 0.4527016736701475 0.0518964343285014  
0.5828859256644842 0.9525417972881578 0.1603842500247969  
0.3288603226380881 0.8611430387822583 0.6601614479358431  
0.2689217106493947 0.4264620372789529 0.4338258694655445  
0.6295205611586171 0.3683159077369526 0.9384262367727135  
0.7711725248031470 0.8654555636535143 0.2630495922897900  
0.1356781964084613 0.9316976593573655 0.7676726547167496  
0.1302509662901338 0.3678602113599477 0.7751063998634894  
0.7702946781473081 0.4314128639420367 0.2715798923687731  
0.6279865217792959 0.9344334559210410 0.9396849720077930  
0.2773866179326592 0.8719246964695400 0.4356518961393128  
0.4033037774357477 0.4724938853550805 0.3285558433232553  
0.4981260053729206 0.3249041845289301 0.8284779903122101  
0.9069910315936255 0.8286417897707885 0.3773608502371237  
0.0034364058398273 0.9729932523755819 0.8763207914391480  
0.9941312740829252 0.3275793711569823 0.8832902661455565  
0.9029647139048946 0.4709070922193200 0.3798154855993408  
0.4985424883858128 0.9606832387568022 0.8280255458285571  
0.4074477243607211 0.8267095778390482 0.3217612930318849  
0.6257145641357515 0.2288173316972585 0.2950309541233046  
0.1263115815108772 0.0704154505465833 0.4066317424502863  
0.7812786233559202 0.7302872550356958 0.9095183696102772  
0.7716676069522191 0.5728634586723449 0.9152477633151429  
0.1267677241567882 0.2243984782784124 0.4202624690392025  
0.2805798669047629 0.7289274122268282 0.7813255628208094  
0.6264556166069348 0.0732336045453794 0.3051924464835456  
0.5236685016718144 0.2786490657400073 0.4556564603018822



0.3731854504672650 0.5233969347916644 0.9542669477084198  
0.0232507072389684 0.0204645759876797 0.2550266749360486  
0.8823685410857892 0.7763888595179018 0.7556944082569832  
0.8740185706630929 0.5223565185242119 0.7609414525829170  
0.0269044263984078 0.27388556644594804 0.2623565906808208  
0.3671794484327400 0.7808933364320654 0.9489527220118756  
0.5256150408439386 0.0233120987044136 0.4533991403825272  
0.4823467503773650 0.2234603108810657 0.6601699265004848  
0.4155620691135894 0.5670452627815650 0.1567939282347605  
0.9794024506457997 0.0680966529761813 0.0490215537653297  
0.9220370147230168 0.7288336545036850 0.5459556425483200  
0.9174001105661383 0.5708710851450844 0.5545086151722425  
0.9802848400897025 0.2293298508576448 0.0570846692629430  
0.4209272386905266 0.7279101165807277 0.1464649318935862  
0.4719280362182053 0.0641042938832852 0.6565153615014426  
0.3255555429364954 0.2330915682169310 0.6394813617160601  
0.5707526254264300 0.5643811853929104 0.1452019591434598  
0.8240103584150263 0.0696855857140534 0.0600239672178559  
0.0804262719221544 0.7246738468150499 0.5585408362302432  
0.0745503700550895 0.5655879915762773 0.5646701109333867  
0.8260370261270337 0.2318393985137031 0.0633615949310944  
0.5751959327875192 0.7258808816547917 0.1449975204829416  
0.3171609364240634 0.0754383334779786 0.6334882069257312  
0.2731587190857602 0.2737770419446501 0.4305742792055067  
0.6239069538405347 0.5256883925799524 0.9286912029632668  
0.770666659331403 0.0234883167422471 0.2753679794605352  
0.1315156368541699 0.7725739245142994 0.7706512639587457  
0.1290440340088115 0.5250119737375143 0.7744773384922528  
0.7732291885907383 0.2729967377050814 0.2745059518371519  
0.6303619209997557 0.7734456440556435 0.9426208912512356  
0.2734421757837953 0.0283853539584663 0.4251323843083742  
0.4054729382521077 0.2289557154220729 0.3187075041728120  
0.4892580113656065 0.5710120261918662 0.8295687626841943  
0.9037571714634202 0.0668517865028090 0.3905508819280210  
0.0022264716767574 0.7253446302134514 0.8880780676575839  
0.9952056160574051 0.5709253470597717 0.8904671305350069  
0.9047141797636827 0.2225077732596513 0.3883928755491357  
0.4072603491343443 0.0764916364848632 0.3208463977844258

Structure 35 S=10/2

1.0000000000000000  
20.1473052208878016 0.0000000000000000 0.0000000000000000  
0.0000000000000000 19.7681594983396991 0.0000000000000000  
0.0000000000000000 0.0000000000000000 13.2309279702280005

Al C Fe H O Si

2 1 2 14 202 94

Selective dynamics

Direct

0.2783183090821737 0.5762412441654519 0.7837279601228744 F F F  
0.4966183454107096 0.7316343210992429 0.8304570976022490 F F F  
0.0816440562910470 0.6455444265585339 0.1249608261495758 T T T  
0.3504339882879585 0.6541365900956986 0.5689823600354766 T T T  
0.4804382711184211 0.6758534002280177 0.6242395026162474 T T T  
0.4541340578969273 0.6071501776534212 0.3599153438539009 T T T  
0.4443967602721522 0.6836894155653584 0.3316930121359529 T T T  
0.5651208199870544 0.7332065534102962 0.4887439547380860 T T T  
0.5182671811976787 0.6757629516016822 0.4351336049426519 T T T  
0.2975615474851356 0.5532591128667685 0.5837494439492641 T T T  
0.2372474077225890 0.5961053580020795 0.4149405635717952 T T T  
0.5948122883182947 0.6099433927440238 0.7246480739294968 T T T  
0.6073668414471238 0.6217878500252180 0.6066085625400411 T T T  
0.3152704031578690 0.7467822562269603 0.4541762085055338 T T T  
0.1812458455619700 0.6409452136399927 0.3581973577013823 T T T  
0.2600488025061360 0.6831321667619290 0.4371492223434790 T T T  
0.0325236175357369 0.6258331528487922 0.1449591881874727 T T T  
0.0802050506078652 0.7006323560472070 0.1148019357505706 T T T  
0.1021891689656658 0.6202016642252213 0.0584105182630039 T T T  
0.7070721631194701 0.4677949140879392 0.3234162119377260 F F F  
0.1910837620628385 0.3209470439340549 0.8172226237485560 F F F  
0.2107961025363636 0.8321894640200824 0.3988041514520404 F F F  
0.6947738777857424 0.9661898789445544 0.8903403284657330 F F F  
0.6934214543800579 0.3280510939346826 0.8958498688247687 F F F  
0.2059424844456927 0.4764844886773076 0.4019759384458581 F F F  
0.1982421595974913 0.9730528867267978 0.8169886116766989 F F F  
0.7079682695191707 0.8200664981530466 0.3037931408252348 F F F  
0.5932911198290611 0.4689839998698844 0.4198693852259368 F F F  
0.3040566655325918 0.3262921282606399 0.9190486566376705 F F F  
0.0984378419799654 0.8312935056470749 0.2935950297071628 F F F  
0.8078333858250133 0.9661802399440518 0.7906432110214112 F F F  
0.8038146423020365 0.3356318731298416 0.7906436743681340 F F F  
0.0970459950624161 0.4625222835067007 0.2912493081135494 F F F  
0.3123751310895955 0.9877632562501404 0.9128124436774314 F F F  
0.5994490307624147 0.8339709653746823 0.4139552728945119 F F F  
0.6066901710034145 0.5349940993080295 0.2442961713739180 F F F  
0.2952575905592667 0.2534123833789650 0.7470164495298590 F F F  
0.1111054432369016 0.7554018990437186 0.45862477699221501 F F F  
0.7940567123888513 0.0406267455806884 0.9581281813717197 F F F  
0.8005888839729778 0.2603684350412649 0.9566336438170424 F F F  
0.0952810433644444 0.5375210496502874 0.4578667272556984 F F F  
0.2910900470074509 0.0558602617731125 0.7448094618095240 F F F  
0.5959245308878636 0.7543598174851667 0.2558949775897048 F F F  
0.6030379015983698 0.3999604794656406 0.2504057145515546 F F F

0.2954067865794201 0.3869454048826739 0.7435152955496847 F F F  
0.1014427000169817 0.8896178389830638 0.4711537622991742 F F F  
0.8018559039203197 0.9061477399734201 0.9671865342036838 F F F  
0.7974845875198469 0.3949195422127758 0.9692714985470658 F F F  
0.1041465219681896 0.4023992089026081 0.4685242960526139 F F F  
0.3094588466336106 0.9238886230131484 0.7353935961128144 F F F  
0.6028058038677599 0.8884992387669683 0.2325180268342280 F F F  
0.5214072060756649 0.4587633617974802 0.5840451465793777 F F F  
0.3793765985716959 0.3554595579220887 0.0760502519542925 F F F  
0.0290757862927009 0.8528532542653835 0.1299179355616147 F F F  
0.8812038269352271 0.9400319024064387 0.6313761945578236 F F F  
0.8772557830491792 0.3561147487266467 0.6297895812423420 F F F  
0.0215474560647380 0.4424159462596720 0.1313036024559793 F F F  
0.3758862963521565 0.9529914382090183 0.0795683306788675 F F F  
0.5283813338159220 0.8578811208661890 0.570257882523839 F F F  
0.5139825105813358 0.3606373605558133 0.4453244570594066 F F F  
0.3733865784577404 0.4428989861624757 0.9234746491620882 F F F  
0.0182972651023618 0.9396441078088102 0.2846702111375023 F F F  
0.8858663652450360 0.8562774958529218 0.7902434838494088 F F F  
0.8849797295883519 0.4420794814209330 0.7862726651126906 F F F  
0.0158775512915952 0.3551824995289152 0.2866307481018566 F F F  
0.3396020894446039 0.8599476025286492 0.9431430465702846 F F F  
0.5220883680149626 0.9463668099592937 0.4162791121288976 F F F  
0.463348557252968 0.4809642628845765 0.4061522630339596 F F F  
0.4333767850043202 0.3252362268597153 0.8977194201157133 F F F  
0.9663016163226672 0.8185654487696112 0.2998925954097160 F F F  
0.9384829588884074 0.9770571887368646 0.8046910416006199 F F F  
0.9343242579412347 0.3196273848707136 0.8033675380810266 F F F  
0.9672320860648682 0.4779536433553915 0.3060405034278020 F F F  
0.4384012375883160 0.9461089854823470 0.9070121741399291 F F F  
0.4697801937324044 0.8252127255282176 0.3963467141542338 F F F  
0.4667359478121469 0.5181329172394200 0.7419344178220371 F F F  
0.4233805153484482 0.2795925092950426 0.2241038386141625 F F F  
0.9848802118470914 0.7751242997340952 0.9845176805170794 F F F  
0.9240018434308865 0.0208083447909075 0.4869673006740669 F F F  
0.9144303374431217 0.2735063123655550 0.4846168197296237 F F F  
0.9808960987934654 0.5241537613808802 0.9877686335713634 F F F  
0.4188634022734234 0.0246588238667513 0.2312247931033937 F F F  
0.4962734978402921 0.7672554869056825 0.7061663209876627 F F F  
0.3968516167444278 0.4286507448245587 0.6333371216174086 F F F  
0.5071992894738244 0.3588998434051902 0.1259861974824190 F F F  
0.9027590753158137 0.8610003922587950 0.0774162772416318 F F F  
0.0090422413501159 0.9430600113033876 0.5864901943625682 F F F  
0.0032602888970317 0.3542559810503931 0.5747985089459675 F F F  
0.8934649661990051 0.4463848880322701 0.0836477917222282 F F F  
0.5042337121960543 0.9461507205860968 0.1322042306638593 F F F  
0.4066270375485743 0.8644830474663721 0.6400780228995302 F F F  
0.4980778980023786 0.3885893729418868 0.7484268429896588 F F F  
0.4174721483815134 0.4128600823723900 0.2473566074929963 F F F  
0.9965230701500829 0.9075314584691583 0.9539847200299789 F F F  
0.9227076582976181 0.8878861497562980 0.4584835718143054 F F F  
0.9110916170056100 0.4059831376249079 0.4528871030156338 F F F  
0.9803652604572974 0.3905661541681908 0.9587704450122843 F F F  
0.4103088980707028 0.8907234132919086 0.2456858456532771 F F F  
0.5091560312429451 0.8951135372213486 0.7573282878159233 F F F  
0.3046341832669768 0.5168142914767486 0.6946142837114238 F F F  
0.5988663771253471 0.2726552057378555 0.1949071059607661 F F F  
0.8175855405491959 0.7740524701272022 0.9994005260241252 F F F  
0.1006514191101360 0.0217975202976106 0.5015627038843746 F F F  
0.0972563921505412 0.2712409344891071 0.5093671028302538 F F F  
0.7992563690727579 0.5262518386788244 0.0088465443848023 F F F  
0.5947840644986329 0.0231635710394187 0.2205278793966912 F F F  
0.3067741917805336 0.7909080427857518 0.7131160468735871 F F F  
0.2737337511269047 0.4266503086541036 0.5582893859537421 F F F  
0.6311946046269625 0.3683911035872711 0.0616191833525193 F F F  
0.7785283740081042 0.8568018482535606 0.1457424146351372 F F F  
0.1354368923697535 0.9385259780858419 0.6480830354443512 F F F  
0.1254969151982337 0.3592903674257997 0.6529099373114846 F F F  
0.7696067367050574 0.4385331153232386 0.1521685493943821 F F F  
0.6289769665780156 0.9501158051011060 0.0622381567477746 F F F  
0.2851143423941309 0.8707963520065647 0.5574073352356876 F F F  
0.3347342260438566 0.4555978514154333 0.3880487011960128 F F F  
0.5635240415368870 0.3324543557397703 0.9004257246208880 F F F  
0.8372557814268689 0.8431632049262845 0.3218307576006012 F F F  
0.0688984315592904 0.9657993234197590 0.8130778947040582 F F F  
0.0629169534353267 0.3394057321011132 0.8237493849152955 F F F  
0.8368580324515804 0.4687878072704379 0.3163810969920036 F F F  
0.5658993111441220 0.9737602001365815 0.8919444517881132 F F F  
0.3388762433444512 0.8302128070334689 0.3878255847974970 F F F  
0.2527560056624765 0.3517570898279061 0.3950606092732514 F F F  
0.6328652496522551 0.4472080712084221 0.8968896534143553 F F F  
0.7536684889040117 0.9446774273106300 0.2951379906999776 F F F  
0.1413088111450733 0.8528560048007847 0.8035063750374647 F F F  
0.1429894747445175 0.4457460283166128 0.8060542191854552 F F F  
0.7721701386835846 0.3521346382951478 0.3072595130242561 F F F  
0.6246569071180872 0.8543040534408348 0.9191036803302453 F F F  
0.2753689954781180 0.9486592791320803 0.3927577727943330 F F F  
0.3923642950970390 0.5450851009518161 0.2727994298770966 F F F  
0.5050510455105481 0.2547076531395618 0.7691934002266484 F F F  
0.8960323279940212 0.7562866592191781 0.4390915170310663 F F F  
0.0058031212272027 0.0428172848831068 0.9413492288838867 F F F  
0.0009141168681737 0.2573099121083899 0.9463282516733429 F F F

0.9010712123248226 0.5414344166406266 0.4467865247853169 F F F  
0.4822945335132189 0.0286880139117685 0.7662244624037555 F F F  
0.4052855841035097 0.7549768613457744 0.2618060716689428 F F F  
0.7043176025365767 0.2374174901558135 0.3082010152343457 F F F  
0.1928952000070012 0.5713147066404147 0.8008598880901161 F F F  
0.2049774489399567 0.0624766465099853 0.3897258728635506 F F F  
0.7031047315185788 0.7480558089942946 0.9044356330271839 F F F  
0.6918790014986200 0.5671524707481126 0.9043482426032767 F F F  
0.2072728593069257 0.2278238020385501 0.4134468360098467 F F F  
0.1995073525552442 0.7324722715352934 0.7901947886866552 F F F  
0.7066890954271372 0.0687101084111958 0.3077483054121615 F F F  
0.5890872615512990 0.2561047383932760 0.3955660278875044 F F F  
0.3185067399736639 0.5646027296309057 0.8983698329217304 F F F  
0.0898460338936218 0.0508975894047197 0.3045671764487068 F F F  
0.8153645574171833 0.7431341491167416 0.8031914863230014 F F F  
0.8045525908393643 0.5481699067384440 0.8098117161275056 F F F  
0.0961790250002892 0.2492966762950388 0.3107779155831665 F F F  
0.3096344311409922 0.7341552503882625 0.8951700101921602 F F F  
0.5966063544192366 0.0568360266233583 0.4149485110530478 F F F  
0.6062174246459975 0.1511022640736286 0.2716165823118857 F F F  
0.3008525105192135 0.6566004988877125 0.7276522783453601 F F F  
0.1064508647361109 0.1469142871482489 0.4421262964002395 F F F  
0.7913810385447420 0.6501771631156430 0.9423293056811914 F F F  
0.5294971816355130 0.2570241463756915 0.5731792021533906 F F F  
0.3687052490147380 0.5273987022723077 0.0790410433366802 F F F  
0.0251300459067778 0.0291529629864868 0.1355456458993487 F F F  
0.8812396665828075 0.7720745292058169 0.6353690641607344 F F F  
0.8719799358004252 0.5320645908556614 0.6402085047134136 F F F  
0.028622055591470 0.2644187646384353 0.1410033854247104 F F F  
0.3694615307370981 0.7639094105629312 0.0700455407341281 F F F  
0.5225494683707552 0.0277247500232534 0.5760075767699178 F F F  
0.4571320556161993 0.2425460445309042 0.4100434222912881 F F F  
0.4490549818568255 0.5537483363205808 0.9320790135560060 F F F  
0.9576402289123109 0.0584041332626342 0.3004953429729866 F F F  
0.9481750421835287 0.7381873677235902 0.7986969542183147 F F F  
0.9355395768255903 0.5646394151172771 0.8083829264895215 F F F  
0.9646621125641985 0.2328688548820494 0.3090925768679114 F F F  
0.4370225447273839 0.7730527168637238 0.8990000665773650 F F F  
0.4648682999137037 0.0673174285228413 0.4071432769054724 F F F  
0.4931824582449806 0.1432841970175716 0.6654388141881924 F F F  
0.4065014843471673 0.6476989932402404 0.1466183127929099 F F F  
0.9921126624009489 0.1487365487855854 0.0598295641657245 F F F  
0.8969265084005968 0.6504430936533012 0.5590081956605459 F F F  
0.4057596137035446 0.2433909360406190 0.6381657724591747 F F F  
0.4930421405648602 0.5458701262394143 0.1464867353124149 F F F  
0.9032831864260160 0.0494162823952564 0.0685335147168047 F F F  
0.9988031622869187 0.7369297104761259 0.5603440377908271 F F F  
0.9952844436754305 0.5616336088875897 0.5843698542705908 F F F  
0.9038388691730574 0.2486492759048744 0.0822587107478014 F F F  
0.4976933681625724 0.7453251853019367 0.1196531339037392 F F F  
0.3970676255146159 0.0553760170691433 0.6204992417012889 F F F  
0.3075513007076296 0.1542883830849178 0.6138236514426936 F F F  
0.5843844513978596 0.6454520175365488 0.1406255328102759 F F F  
0.8144238225742342 0.1501097052902765 0.0667348931512279 F F F  
0.0972474449330960 0.6471336652178366 0.5718780637664196 F F F  
0.2945368852155710 0.2775173358731706 0.5472857036008847 F F F  
0.6029277919278542 0.5309104164309275 0.0434097730808318 F F F  
0.7882419321133369 0.03423370114641956 0.1583310045089306 F F F  
0.1077810502738714 0.7695234215764444 0.6567695903974169 F F F  
0.1119244732324631 0.5253670220391555 0.6551669284861958 F F F  
0.7831157387014755 0.2669417307418271 0.1538130626945033 F F F  
0.6244498038878703 0.7630112146848944 0.0642655242435382 F F F  
0.2780947088141090 0.0317985317193177 0.5489676918947879 F F F  
0.3305489685267702 0.2452583250146319 0.3583134445536089 F F F  
0.5687834934323988 0.5618329288771022 0.8502690881772139 F F F  
0.8315274540347417 0.0474672150328033 0.3492108697340797 F F F  
0.0758040144474919 0.7406026775658319 0.8477797947574004 F F F  
0.0653931035590958 0.5515250648955288 0.8386505200105034 F F F  
0.8338674077678547 0.2354358389150093 0.3336200327813685 F F F  
0.5739326157148810 0.7310543479533891 0.8850520289023933 F F F  
0.3350389910856109 0.0671571654334002 0.3744581763376829 F F F  
0.4109240040637019 0.1535429995684794 0.2779841388507833 F F F  
0.4752502514100101 0.6482031487938613 0.7897454431181501 F F F  
0.9051528020711572 0.1456050009782714 0.4303859719428047 F F F  
0.9974370766264045 0.6490910588298178 0.9297186527745609 F F F  
0.4221907378172280 0.6031560173482179 0.5913102322576402 T T T  
0.4045543468322954 0.7258099738319644 0.5738716114874973 T T T  
0.4781299843988586 0.6496515917489510 0.3493195736588280 T T T  
0.5425248812615365 0.6901871824823931 0.5004572106204754 T T T  
0.2978099721729325 0.5858015037086201 0.5259870150089490 T T T  
0.5813773752149519 0.6359344757422920 0.6648157873788280 T T T  
0.2294154021551587 0.6369128828246245 0.3739598974867597 T T T  
0.2905317223876597 0.7113656766021201 0.4899723494664619 T T T  
0.1281158508704434 0.6300958875585670 0.2056933491307782 T T T  
0.1070686636185484 0.6546518762096963 0.2942866511076512 T T T  
0.6272616420165846 0.4681376630012437 0.3081004519345356 F F F  
0.2713005932726915 0.3215280252626869 0.8065066065152422 F F F  
0.1307088911004968 0.8270918504776859 0.4064528285516218 F F F  
0.7743506844302104 0.9699810203270189 0.9026309816362357 F F F  
0.7735620646196608 0.3295884517706895 0.9043463948114834 F F F  
0.1255786319242560 0.4694004608101068 0.4062534856495574 F F F  
0.2772496138004499 0.9843858002102195 0.8022365231883128 F F F

0.6276430124549037 0.8244862391976540 0.2986625433248591 F F F  
0.5229046932430919 0.4412850283124428 0.4644870397504022 F F F  
0.3725868731945781 0.3634858251666913 0.9544633257393400 F F F  
0.0280129410833396 0.8609373258355646 0.2518745861185181 F F F  
0.8783518705656661 0.9346678758159754 0.7534874288055988 F F F  
0.8753338796662433 0.3635586711517789 0.7515287095042709 F F F  
0.0254813523202557 0.4337811465191592 0.2528757799278551 F F F  
0.3670431242833487 0.9361721176652367 0.9604330296819654 F F F  
0.5291433561166841 0.8677217169268587 0.4498419062482526 F F F  
0.4695261441813301 0.4488709675003690 0.6775232027984543 F F F  
0.4316114194724108 0.3519597870036222 0.1685839942390999 F F F  
0.9778992008635470 0.8495107282213539 0.0350852363972010 F F F  
0.9342397819086159 0.9477313701357701 0.5398905960558977 F F F  
0.9271912258846058 0.3473054584003421 0.5345186112222322 F F F  
0.9688385054565742 0.4507074282958357 0.0391523515009027 F F F  
0.4281054233253130 0.9538917791305224 0.1720669982070220 F F F  
0.4826672764899200 0.8449636723062284 0.6693825532007764 F F F  
0.3181055743854202 0.4408195000265849 0.6588403831933505 F F F  
0.5846483273988312 0.3497914881546791 0.1576416288041216 F F F  
0.8252600200491500 0.8493362207029733 0.0470867489451336 F F F  
0.0864791852287397 0.9486411202846057 0.5523204041645329 F F F  
0.0823405903330823 0.3468285626751850 0.5520128252566181 F F F  
0.8152817236036753 0.4514287790561582 0.0532410946401711 F F F  
0.5824680618596361 0.9522229792511965 0.1619962280352070 F F F  
0.3273098555906131 0.8613555717455341 0.6613368754979447 F F F  
0.2672385068516050 0.4278658145691949 0.4369522816030837 F F F  
0.6299148538366808 0.3696462292233065 0.9385467853373441 F F F  
0.7700574737042203 0.8664915138275404 0.2664858350023493 F F F  
0.1359216067142341 0.9317916247141156 0.7706327483681861 F F F  
0.1306708914427119 0.3675086202387448 0.7749247472084804 F F F  
0.7715668242958174 0.4312364940772468 0.2744777043723516 F F F  
0.6284516333952368 0.9346265842684929 0.9412461710809978 F F F  
0.2768160062480050 0.8719383127857654 0.4358652103223548 F F F  
0.4016900230030060 0.4718566547632292 0.3283763851380712 F F F  
0.4992919925627675 0.3264210359104069 0.8281602838057651 F F F  
0.9056356367171787 0.8275132799385148 0.3799270130286772 F F F  
0.0022614026447201 0.9722476285595434 0.8790090473303493 F F F  
0.9948536895854616 0.3275747261707096 0.8835860771331170 F F F  
0.9041833767261451 0.4722309243048315 0.3817326893829147 F F F  
0.4982840412672687 0.9604198433073918 0.8295491276873008 F F F  
0.4063172208078072 0.8273949402305547 0.3215050412010427 F F F  
0.6246991851283283 0.2298783617680016 0.2925783193530052 F F F  
0.1259446736623460 0.0702013672705419 0.4103403471222009 F F F  
0.7806542809862833 0.7291879964872763 0.9127355583119297 F F F  
0.7718128541528344 0.5725911632580534 0.9164147254496484 F F F  
0.1269927660662731 0.2247464898776030 0.4187914981552083 F F F  
0.2799274313502522 0.7282482069725162 0.7805264398589813 F F F  
0.6265440747212523 0.0745151861093376 0.3031618736528330 F F F  
0.5227134341607211 0.2793302092420049 0.4555573081064423 F F F  
0.3742751875084096 0.5227901980418181 0.9555310251347819 F F F  
0.0226749536306272 0.0194929644287924 0.2570186483396881 F F F  
0.8822897253960917 0.7771814565808910 0.7576583965301111 F F F  
0.8741000696992671 0.5216959560550194 0.7618007158485227 F F F  
0.0265876212767537 0.2753097524522232 0.2624899439755737 F F F  
0.3654433280540488 0.7817638943503766 0.9491735147579234 F F F  
0.5266918046129874 0.0249286046551234 0.4536551765200301 F F F  
0.4827287527981170 0.2242218199452495 0.6609194228257849 F F F  
0.4155473747530820 0.5670640401669615 0.1589614264414365 F F F  
0.9809569446761728 0.0683570622963003 0.0511675468702109 F F F  
0.9192122979376478 0.7284755083244150 0.5486957183181431 F F F  
0.9173376963365598 0.5715053318486056 0.5574665756159902 F F F  
0.9808054171824239 0.2293499602974478 0.0570610902354503 F F F  
0.4205786102924947 0.7278581736678333 0.1464044363475097 F F F  
0.4734919447355352 0.0643499625879542 0.6574568291391714 F F F  
0.3260329097936037 0.2323194376848221 0.6379654044303393 F F F  
0.5711090482577887 0.5650286450817390 0.1438770112375920 F F F  
0.8251759350926022 0.0691513155370060 0.0628333829159189 F F F  
0.0784759677222908 0.7266087265816239 0.5625196027992203 F F F  
0.0749142643050220 0.5681433212004023 0.5680007744385875 F F F  
0.8257809303492962 0.2310225957597396 0.0645722226316607 F F F  
0.5750714640988974 0.7264435206635795 0.1440764843616691 F F F  
0.3190851600269440 0.0745167384491054 0.6333039980640791 F F F  
0.2720334970853528 0.2751852472804330 0.4290716385457856 F F F  
0.6233742024142899 0.5266578280359298 0.9253019269494089 F F F  
0.7710014809937604 0.0240508929804761 0.2771339744981489 F F F  
0.1314517374117301 0.7736050121025571 0.7741975326969808 F F F  
0.1304452135837550 0.5251057805953110 0.7762933493511497 F F F  
0.7735277700230725 0.2729031321072029 0.2756857480663299 F F F  
0.6301951194339281 0.7734558716102384 0.9413985001455671 F F F  
0.2736026899971193 0.0279078696963140 0.4264109986624263 F F F  
0.4050698463091464 0.2309451530765187 0.3179478510440887 F F F  
0.4885691663542175 0.5710103017555213 0.8286921883086933 F F F  
0.9042279271124016 0.0677951546653048 0.3916027169189249 F F F  
0.0015616047550537 0.7265175703593343 0.8891704659451420 F F F  
0.9956547632826016 0.5711990862255263 0.8896741103483379 F F F  
0.9044161594220057 0.2229664140614389 0.3894921526713446 F F F  
0.4071991603714125 0.0773342818933784 0.3225276536442792 F F F

Structure CH3OOH+2xH2O/36 S=8/2  
1.00000000000000  
20.1473052208877697 0.0000000000000000 0.0000000000000000  
0.0000000000000000 19.7681594983396742 0.0000000000000000

0.0000000000000000 0.0000000000000000 13.2309279702280254  
Al C Fe H O Si  
2 1 2 14 202 94  
Direct  
0.2787365810898523 0.5758668685465264 0.7859509712724351  
0.4962447157533492 0.7312314889836177 0.8316520827346339  
0.0823355172655756 0.6441236392382963 0.1238114595512553  
0.3497667182906782 0.6550002586650115 0.5685013233322215  
0.4786326503831434 0.6816353975883971 0.6209011865404601  
0.4547551847793501 0.6074029233102072 0.3611484624415299  
0.4441852186780618 0.6836113753470583 0.3323483289751215  
0.5685705224879463 0.7365210525917285 0.4804763896008115  
0.5217307006429783 0.6776380554061255 0.4326085833790271  
0.3030680759254294 0.5526762155191207 0.5900747305658611  
0.2315771540178660 0.5893609724359278 0.3975353970417593  
0.5866760736095937 0.6109461749073661 0.7198214518307224  
0.5989733030529167 0.6271704489272839 0.6021090034024094  
0.3185719086475767 0.7477752343922608 0.4688599824228814  
0.1658124522965621 0.6506275430077758 0.3264383016695331  
0.2487833337924542 0.6661310075518764 0.4160646335849278  
0.0350765973892100 0.6232833370414937 0.1514378526569363  
0.0780848221007919 0.6990453835207384 0.1125053117502966  
0.0979108745152537 0.6189710486474225 0.0539406311836276  
0.7071929713126167 0.4674276839031706 0.3239507577536100  
0.1910018760114695 0.3207563539355278 0.8174329167406655  
0.2106326589379797 0.8315478274048265 0.3995195955312953  
0.6947399985258471 0.9667227215086031 0.8905224733489248  
0.6934054649732997 0.3280644163727882 0.8961995105304030  
0.2058189101186660 0.4778752318886185 0.4036707428285181  
0.1983325278024151 0.9731302869033026 0.8170547039019801  
0.7080523752366580 0.8201952872837402 0.3043344451476765  
0.5930076379716107 0.4695476459593645 0.4195789857594281  
0.3040740506017585 0.3249504672034664 0.9193343264512926  
0.0985216397399124 0.8321702955107936 0.2935679837229734  
0.8078848477318614 0.9664690370325932 0.7908764659149830  
0.8037878531269365 0.3353748910326931 0.7909876141178288  
0.0973675937761657 0.4625757952315638 0.2915231962581672  
0.3125078154705125 0.9880780250196612 0.9129277463214885  
0.5991805798646977 0.8339741957437677 0.4139289375837992  
0.6074441693715508 0.5348224693958779 0.2435032299611533  
0.2946051787485791 0.2521487271059334 0.7471826496134149  
0.1099622101893265 0.7555491104467258 0.4584804859720932  
0.7941885737236046 0.0407073269204156 0.9585726317540293  
0.8003152377473112 0.2599887923256345 0.9569560113681287  
0.0940305357164254 0.5376972917361862 0.4581753426439393  
0.2914204948184421 0.0555239342017770 0.7444457718893123  
0.5960391647752115 0.7545053043150008 0.2557472362609415  
0.6029923622661264 0.3999012057558543 0.2508952421020230  
0.2960700545255142 0.3854906696321686 0.7436911831123231  
0.1017837372180749 0.8897710707028996 0.4713016815255385  
0.8015242791805394 0.9061182843424255 0.9672302918470163  
0.7976072323250740 0.3945453661626672 0.9698476872477438  
0.1043666845678536 0.4027820574904151 0.4689035102367533  
0.3095240622664065 0.9232627662379304 0.7363688387075149  
0.6030464261777727 0.8886780868393223 0.2327273042305524  
0.5216644085795002 0.4592370896587400 0.5843841584626600  
0.3792891871573033 0.3553048124323980 0.0763637082609847  
0.0286881771781057 0.8527977005168451 0.1300083787462267  
0.8812069698950535 0.9403175180558754 0.6315201373484208  
0.8772991257481655 0.3561293512146859 0.6300603258997547  
0.0216853547601070 0.4426388883941160 0.1313705871760962  
0.3758957656812708 0.9534521266151282 0.0799786334610396  
0.5284139341573418 0.8583600018546684 0.5703603016519079  
0.5144163569199833 0.3607536999860337 0.4461971121843629  
0.3711634091307046 0.4425656578786530 0.9240707679174287  
0.0175830422362995 0.9396851255387431 0.2844979590162479  
0.8856161835756261 0.8564534424507518 0.7904229331394823  
0.8846249029026377 0.4419970292449963 0.7866275508928673  
0.0162373757321859 0.3553991001730619 0.2865942418818451  
0.3389551009669605 0.8602562382245109 0.9441308822685106  
0.5222927596856174 0.9468073097181161 0.4163045870061218  
0.4628915359034529 0.4807290431863682 0.4071590778553371  
0.4333407677742768 0.3259749852864183 0.8976755803815343  
0.9663762616724042 0.8183618500737629 0.3003319654078820  
0.9385833509554632 0.9771315785387458 0.8047210552962174  
0.9342856340767782 0.3196892722691066 0.8036475087830629  
0.9674186826767424 0.4780062068520149 0.3061717752557810  
0.4382737489052921 0.9457834340846841 0.9073659115331247  
0.4693391343834726 0.8258925686064296 0.3969066419860842  
0.4658447261186321 0.5183888448473468 0.7420023887138724  
0.4240164323430828 0.2796884491726536 0.2241375509881736  
0.9845859034726342 0.7752797043092968 0.9839104157313278  
0.9242203137854481 0.0206822709588721 0.4866500728423850  
0.9142611852566402 0.2737491947772123 0.4846612580365261  
0.9807909667508908 0.5240593505199702 0.9871240771707405  
0.4193258546514075 0.0252844379037808 0.2312937534229266  
0.4973889530792319 0.7664036410044693 0.7052378460007825  
0.3974361885988253 0.4280528394912628 0.6335386917081151  
0.5070946877970555 0.3597069458506043 0.1260811603132614  
0.9023845349845520 0.8607647983413520 0.0774684562888036  
0.0090908598413458 0.9430402748449379 0.5866255872143085  
0.0033967409673229 0.3541559051395807 0.5749665071690275

0.8935344651437864 0.4465662383512238 0.0837792862007563  
0.5040945417153226 0.9458112549633939 0.1330521520231949  
0.4066118290565619 0.8635577088453159 0.6398729064934675  
0.4989369463179105 0.3889550321947938 0.7489599624421543  
0.4170000520227873 0.4128702093653523 0.2478835386750539  
0.9960604009709236 0.9077590102467880 0.9545416977636039  
0.9226285107996881 0.8876596696292972 0.4589353688026356  
0.9113472427255235 0.4062955819204094 0.4533226068374477  
0.9804268171814320 0.3904857530226989 0.9591542664264420  
0.4093517530096675 0.8914545066247955 0.2467509017469400  
0.5088566780588243 0.8938427493974567 0.7584909375740182  
0.3065378970521001 0.5159311746590637 0.6980810286753663  
0.5984530320784097 0.2728408275395274 0.1947804794224681  
0.8165788517503781 0.7740632976029720 0.0002438136545673  
0.1008038946662031 0.0219061445911715 0.5022762808814553  
0.0973552865577709 0.2714373364297326 0.5089768238476347  
0.7988367465632091 0.5259416215605532 0.0088709110331609  
0.5946729824160623 0.0232827679421455 0.2206452401587387  
0.3077653596867562 0.7899058724980522 0.7119064348274149  
0.2738126506084631 0.4277481837430184 0.5597250572397636  
0.6311710880083293 0.3688129541412014 0.0619019643972093  
0.7782368969186055 0.8574004945691058 0.1461717331609535  
0.1354501852928741 0.9384162282091899 0.6484500245104041  
0.1256872267179797 0.3590380242266317 0.6528897981457258  
0.7697790653562103 0.4384011714188095 0.1526341598521725  
0.6287569219245503 0.9503357703801792 0.0623357240592726  
0.2851545089858745 0.8709607336847515 0.5576564067431337  
0.3343258619175004 0.4556464666199109 0.3886979906399163  
0.5635480806708271 0.3322399649286315 0.9011117756861717  
0.8374070516430820 0.8431766129900976 0.3218813654333639  
0.0690160442230097 0.9653540798405282 0.8137265081497902  
0.0628927194597071 0.3396006887606819 0.8237218253737160  
0.8370271567472121 0.4689461945214811 0.3167602396725139  
0.5658088012182105 0.9734238256431356 0.8917612176085358  
0.3387260477357522 0.8291600920710150 0.3886892306775951  
0.2516540565110010 0.3525163080364259 0.3971647322787690  
0.6327321970043392 0.4471657138562582 0.8966521013744357  
0.7538080501506090 0.9448273499363873 0.2962742080006213  
0.1420410491140238 0.8526776283407603 0.8036849065084700  
0.1433007674438029 0.4456829447192395 0.8057924857363938  
0.7727990193493954 0.3521053176339402 0.3078514960273320  
0.6252874432824246 0.8544707387704534 0.9193002651443792  
0.2754652015288377 0.9480603502230157 0.3925481523936821  
0.3924276029708605 0.5452561056227972 0.2739021342574982  
0.5047675243034681 0.2549529877193555 0.7694791843346952  
0.8956835142498624 0.7561556127230646 0.4394121408727447  
0.0058891031010081 0.0428953508638226 0.9413963888379167  
0.0010537878915506 0.2573177603063776 0.9462585382487003  
0.9012261963479221 0.5416919453138090 0.4469119384013777  
0.4820944935238664 0.0276170822693159 0.7656359098341592  
0.4057247548660222 0.7554669770642949 0.2614343571291724  
0.7040187344447878 0.2379399068771864 0.3081831180047641  
0.1933107228879676 0.5709451368026690 0.8004633571151277  
0.2050430396853492 0.0621651996333638 0.3900422836876575  
0.7028132153032260 0.7475382672324081 0.9038624566126207  
0.691682855377023 0.5671632103513302 0.9041313007765363  
0.2073385088836081 0.2280304539664358 0.4131728568783407  
0.1996563221071085 0.7321004738877733 0.7886243241546165  
0.7067894635911877 0.0689080411330726 0.3074181766827921  
0.5886305782012968 0.2558451382750851 0.3954698162628768  
0.3189981670021104 0.5655122187025675 0.9005357037156151  
0.0898254932612558 0.0505322071635854 0.3051207272093219  
0.8155320515826414 0.7430867444925892 0.8039372512501585  
0.8046321514947790 0.5483813683816048 0.8099887545482047  
0.0960631967457445 0.2490263543993922 0.3105630475615401  
0.3094756712985346 0.7344721029630302 0.8949153240047432  
0.5968152254761939 0.0572053450877388 0.4148462151028761  
0.6063048706496542 0.1512855460106107 0.2711276242603619  
0.3017766865834803 0.6560329703411384 0.7281570802133923  
0.1066849431090925 0.1469143094178476 0.4421473582699307  
0.7911636658394254 0.6500457964612195 0.9428557079078465  
0.5291832509161316 0.2567216346103772 0.5734951470073982  
0.3688298447146031 0.5268573170084797 0.0805675453338856  
0.0254384494870278 0.0293514735856350 0.1356621088347328  
0.8805393473798812 0.7722289060702373 0.6354822073863765  
0.8716116099513975 0.5317487653748252 0.6400988193890000  
0.0285911920377561 0.2645395114702171 0.1410024853541091  
0.3700819019030707 0.7637804730637119 0.0692983169667050  
0.5228523056328397 0.0280556021952666 0.5759577456806411  
0.4566865272890425 0.2430065769222439 0.4106460681164818  
0.4495271100898796 0.5510073714801439 0.9336760565044128  
0.9577006128915867 0.0587940809066705 0.3002825466303219  
0.9484019181792681 0.7386360636149325 0.7980609547462300  
0.9357906171737242 0.5643298361915927 0.8076204964882677  
0.9643947336092474 0.2333713662688526 0.3090253652702527  
0.4364811077442644 0.7747645985539739 0.8968724777325756  
0.4650491229770398 0.0678545226306009 0.4072438190585722  
0.4931284813852314 0.1431254928153786 0.6668023227569981  
0.406531825332071 0.6476969580039922 0.1469789978825871  
0.9923522609007670 0.1488095364060242 0.0597836036504064  
0.8963815874220257 0.6504356163793857 0.5597233524317026  
0.4054336878006514 0.2428479742939079 0.6387739820297730

0.4931260613878268 0.5460729821864775 0.1477927327936779  
0.9035054910481268 0.0494890065328962 0.0688245532197347  
-0.0017308035479796 0.7370403233776378 0.5612320524697201  
0.9949578279617142 0.5619402092368752 0.5854450863339982  
0.9038738509600426 0.2485397304767618 0.0820644828950039  
0.4979217690031165 0.7450601371213138 0.1192622908521932  
0.3972392046837551 0.0553058274425528 0.6200638180057491  
0.3073744693963792 0.1538169685521626 0.6127808628058125  
0.5847087135061737 0.6454293448208606 0.1406651038620944  
0.8143938509048037 0.1500069241643178 0.0677928785151106  
0.0968148342384093 0.6474213326146839 0.5735236711737266  
0.2944781479801141 0.2774787330975051 0.5476711877868036  
0.6021833176514626 0.5310944186532497 0.0424865082622350  
0.7885103720120971 0.0337623708186159 0.1586267799591829  
0.1075631873621073 0.7700507281912279 0.6565481366862072  
0.1118326509146927 0.5254098493651400 0.6551526468323597  
0.7832886627248870 0.2670220822881820 0.1541883359287173  
0.6246153367398072 0.7630713188687890 0.0642385937618233  
0.2782771897727084 0.0309765314233732 0.5489858100360183  
0.3303825074240406 0.2470906269453640 0.3579129800748058  
0.5685187492910779 0.5614911854481881 0.8490090333931902  
0.8315993899219382 0.0479461433113115 0.3494511004997294  
0.0759799287046352 0.7405710492367771 0.8476413610804389  
0.0657545783378903 0.5517451442640394 0.8388337334867815  
0.8335942641807260 0.2349021928281746 0.3341342686524720  
0.5737089675771998 0.7317667441125782 0.8850863342001969  
0.3351155657233923 0.0666199296939288 0.3747566053075250  
0.4101354128798845 0.1540338816158761 0.2788365570783403  
0.4734311803063554 0.6479678235021888 0.7959087819758698  
0.9056394658048872 0.1457496441226969 0.4307689153967517  
0.9969532951079523 0.6491546829836258 0.9287299483600342  
0.4311311431802626 0.6096790167546228 0.5888398381436596  
0.4097208818305120 0.7266533985683326 0.5731267704452402  
0.478388633706438 0.6498857090384070 0.3488801473191079  
0.5468055361118342 0.6934925067896363 0.4957868653380287  
0.3053532216711660 0.5824347185972067 0.5282805806642676  
0.5743102792825232 0.6398997539248861 0.6625167194302859  
0.2266031464196588 0.6342431585003279 0.3675034627883473  
0.2935390262350976 0.7095984626792355 0.4971244960773954  
0.1346863273013700 0.6297606218194947 0.1933637180663001  
0.1204198350791445 0.6627746932366851 0.2848172234393711  
0.6274594322319625 0.4681618715611464 0.3081258037597078  
0.2711669536051738 0.3203761632087903 0.8069095417783270  
0.1304460144624323 0.8269228750508341 0.4064018423531261  
0.7743935983249861 0.9701765685967327 0.9028375679553604  
0.7735748280928977 0.3293666278733650 0.9047305048215231  
0.1252162366787133 0.4701320239741600 0.4067592110900404  
0.2773168250490105 0.9843260563346419 0.8024201930885382  
0.6277692753286211 0.8245670279576656 0.2987015648891799  
0.5230075384885864 0.4414818702330971 0.4648310930936561  
0.3720728373396672 0.3631343636817669 0.9548282754112718  
0.0278507489591246 0.8609395766979769 0.2519307633283503  
0.8783560029844275 0.9348343173419157 0.7536074713374995  
0.8752346761164437 0.3635006906000139 0.7518020840003251  
0.0257740830007579 0.4340674281690043 0.2529240866448718  
0.3668839944516140 0.9363339006842972 0.9609812098999119  
0.5290792442479366 0.8681859227197262 0.4497507367052051  
0.4699976818975485 0.4489459036968847 0.6780230424823949  
0.4316092467146781 0.3522053757175756 0.1688209104069958  
0.9775777508554107 0.8494009652530259 0.0352063257549772  
0.9342872188648338 0.9476802490971448 0.5399771541395605  
0.9272597160926775 0.3474586934596287 0.5347515890017374  
0.9689329568275261 0.4508577749068016 0.0392559831053408  
0.4279750730933268 0.9542383165361399 0.1726854072969101  
0.4827945601640738 0.8448192877518164 0.6692033650336167  
0.3188019053692161 0.4398868751848396 0.6601219481483641  
0.5845166015277452 0.3500985659013426 0.1577512277490838  
0.8248499399707315 0.8493998330392132 0.0474203883471378  
0.0865617814553639 0.9485661410340129 0.5525558892081811  
0.0824535646459449 0.3469643340929585 0.5519049064450415  
0.8153236009519479 0.4513098049440948 0.0535477063022863  
0.5824069321445640 0.9522972938930763 0.1622508598347455  
0.3271629597443741 0.8612473806562524 0.6614932302104485  
0.2668000801670079 0.4286150857968176 0.4383524177261683  
0.6299485744976463 0.3697501157227554 0.9388034166097680  
0.7701622777066549 0.8667085605620497 0.2670510939044478  
0.1360291394894585 0.9316128019233721 0.7709098475291857  
0.1307038967861292 0.3674333758623843 0.7748624022074271  
0.7718711130327259 0.4312030425547761 0.2749230907444092  
0.6285955626185428 0.9347981655600235 0.9413870665716116  
0.2765538133333172 0.8713596087011286 0.4360027905397640  
0.4013560318965320 0.4718499025232995 0.3290545125607746  
0.4994481460587145 0.3266495052432603 0.8285613391482567  
0.9056890973738230 0.8273025809875046 0.3802570013291625  
0.0022320669312078 0.9722210345225644 0.8793037604851640  
0.9948642652018174 0.3276630114865589 0.8837373813561517  
0.9044429518841957 0.4724723259209059 0.3819420062805474  
0.4981254519916898 0.9597898911706932 0.8298456664613402  
0.4059922102922058 0.8276132064696752 0.3216930742926245  
0.6244749011984666 0.2301051869217268 0.2923738426571420  
0.1259802675524868 0.0700706900430046 0.4107237032991614  
0.7804412535246068 0.7290079632615102 0.9131048115411589

0.7716450704572191 0.5724962830134291 0.9165451130527820  
0.1270170955036604 0.2247677065962103 0.4185916969543665  
0.2800415129122751 0.7280439478270549 0.7803220622799417  
0.6266707948009158 0.0747757967134684 0.3029190616662623  
0.5225745786524243 0.2793537080001915 0.4559456615799068  
0.3740338965459910 0.5222013878256505 0.9571301779300451  
0.0226171188304902 0.0194825747200018 0.2570978985767076  
0.8821831350487825 0.7773371691633904 0.7577701686206286  
0.8740112669797594 0.5215972954000311 0.7617369815198294  
0.0265412888866114 0.2755133592245566 0.2624803688544532  
0.3652483086937432 0.7822311848457270 0.9488368538185714  
0.5268872537794977 0.0254155708057762 0.4535731864565576  
0.4824906363923174 0.2240591094086569 0.6614703841863074  
0.4155665174732030 0.5670928109495323 0.1600084606118852  
0.9811728064943188 0.0684435679227262 0.0512929087968367  
0.9187502701176611 0.7284401274485472 0.5491529631476088  
0.9171257272425257 0.5715637905718548 0.5578608629010420  
0.9808871246102848 0.2293968403071457 0.0569867859519523  
0.4207828335556787 0.7277910725219557 0.1462811522101438  
0.4735653960753499 0.0642204408860708 0.6575209013363659  
0.3257074544559458 0.2317421321288231 0.6379992450564828  
0.5712095814553337 0.5650096517948441 0.1437257000786993  
0.8253701479003240 0.0690908158909791 0.0633504744839523  
0.0779847210548916 0.7267443678642822 0.5626917439945454  
0.0745447096248290 0.5685176759140270 0.5684192986020140  
0.8257967828949629 0.2309159923727021 0.0649224186848090  
0.5753145106588061 0.7263689699859950 0.1439929949782952  
0.3191708786528470 0.0741476237896825 0.6328043994922710  
0.2717012516118327 0.2758121492717877 0.4294916535294873  
0.6231231738199425 0.5266930123010221 0.9245558958829621  
0.7711853487682711 0.0241192781269918 0.2775075745803144  
0.1314629712237688 0.7735670487872430 0.7738222972391861  
0.1304812161572884 0.5250627106882663 0.7761235150910780  
0.7736051230268227 0.2728993027669905 0.2760722178965941  
0.6303474056956246 0.7735936385396648 0.9414433298418508  
0.2735832129879366 0.0273139057033491 0.4263922553621460  
0.4048363199542184 0.2316035483590120 0.3182139607052710  
0.4878540648710127 0.5704749745609343 0.8301967930477564  
0.9044471811284306 0.0680079856943935 0.3916617101072742  
0.0015793815301210 0.7266152395477311 0.8887911223311418  
0.9956838483456494 0.5712005392917527 0.8892434119902650  
0.9043924831709655 0.2230667748038908 0.3897071764499584  
0.4071431298585147 0.0776688877783600 0.3228836011619864

Structure TS reaction 35→CH3OOH+2xH2O/36 S=8/2

1.0000000000000000  
20.1473052208878016 0.0000000000000000 0.0000000000000000  
0.0000000000000000 19.7681594983396991 0.0000000000000000  
0.0000000000000000 0.0000000000000000 13.2309279702280005

Al C Fe H O Si

2 1 2 14 202 94

Selective dynamics

Direct

0.2784986461946204 0.5760380728102774 0.7853666078043346 F F F  
0.4963174214690085 0.7310353346392162 0.8308383948420399 F F F  
0.0832782553758686 0.6444588446860037 0.1263964168008250 T T T  
0.3490388182959618 0.6544715360389712 0.5665690725928505 T T T  
0.4773643716097660 0.6808885451475323 0.6215882577094761 T T T  
0.4543666321517808 0.6073512180275639 0.3611871968286599 T T T  
0.4441884689992128 0.6836070396915036 0.3325471562290884 T T T  
0.5674221455406808 0.7355370479958011 0.4832939014822737 T T T  
0.5209140083149849 0.6769865485296054 0.4339224002357355 T T T  
0.3004388207823188 0.5527517278142456 0.5866336838460576 T T T  
0.2319142920594406 0.5920779269374389 0.4033957816832000 T T T  
0.5881358136548076 0.6111237023963308 0.7217693085761828 T T T  
0.5996550388864091 0.6258755067912640 0.6037243164853809 T T T  
0.3175014174502484 0.7473225947001126 0.4649102903232955 T T T  
0.1740207220420056 0.6472718433970013 0.3372092008996326 T T T  
0.2490565110858903 0.6708700483371454 0.4194343465781849 T T T  
0.0358238960447397 0.6236624044644299 0.1529979137062675 T T T  
0.0795704243890333 0.6995197727568061 0.1164354774016135 T T T  
0.0993569635904721 0.6198038494763605 0.0564671365834642 T T T  
0.7071527610863626 0.4676175698432985 0.3237873422382549 F F F  
0.1910426785230825 0.3208294130379485 0.8173258940236394 F F F  
0.2106263746760177 0.8316626782647631 0.3991684453781090 F F F  
0.6946978445060523 0.9666981436891007 0.8906091914388696 F F F  
0.6934173680977551 0.3280815674912319 0.8960211139797423 F F F  
0.2059911002704666 0.4779701769260711 0.4028673625376626 F F F  
0.1981397959848579 0.9732634424449529 0.8169687468857489 F F F  
0.7079438257872610 0.8201920508085152 0.3041891663944085 F F F  
0.5931065703443750 0.4692930391582237 0.4196597871477863 F F F  
0.3040431707222666 0.3253720524383610 0.9191860782253229 F F F  
0.0984548768909761 0.8317454443241772 0.2934739259383505 F F F  
0.8077334032313317 0.9662509291203349 0.7907559373179396 F F F  
0.8038239774956466 0.3354771854755967 0.7908796790493184 F F F  
0.0972690922680215 0.4627050116043065 0.2914960756568874 F F F  
0.3123129629447874 0.9879026797535317 0.9128341111875429 F F F  
0.5991933570513908 0.8339944171753118 0.4139344875125985 F F F  
0.6071622619990222 0.5349861867063197 0.2438857700725876 F F F  
0.2948190642635851 0.2526018933101852 0.7470196540757570 F F F  
0.1102834164208986 0.7556238867138418 0.4586274566871964 F F F  
0.7942765732398840 0.0406295189402144 0.9583487480063582 F F F



0.8003621753528378 0.2600565375791533 0.9567973955613454 F F F  
0.0946682723840055 0.5378807108539263 0.4581196043054732 F F F  
0.2912411831747619 0.0556656387031822 0.7446029910323801 F F F  
0.5959663689287282 0.7544901520043723 0.2557282954767004 F F F  
0.6030601842864982 0.3999859236885186 0.2506397904323237 F F F  
0.2958538855187811 0.3859670029527891 0.7434638671424807 F F F  
0.1017159511663195 0.8899571732254827 0.4709630538181386 F F F  
0.8015308909742132 0.9060665290723193 0.9671938044672288 F F F  
0.7976354416457241 0.3945610541156341 0.9697563767488546 F F F  
0.1045978083219765 0.4028424431662430 0.4688904263578451 F F F  
0.3092934179680142 0.9234099080735021 0.7359843384016145 F F F  
0.6028273099943249 0.8886455386101417 0.2327954858039405 F F F  
0.5215405415301717 0.4589450105226831 0.5842203976684246 F F F  
0.3793417574748332 0.3552830950433377 0.0762223465864764 F F F  
0.0287466491839936 0.8528405840677209 0.1299715752441699 F F F  
0.8811826352262528 0.9401729883907066 0.6315313560116493 F F F  
0.8773714641419375 0.3561749709424760 0.6300251237019268 F F F  
0.0216786707677770 0.4425118501079055 0.1314094503640959 F F F  
0.3758754990087922 0.9533946605437293 0.0796679956058028 F F F  
0.5282301430883081 0.8582032516569384 0.5702165180862906 F F F  
0.5141806248544540 0.3606931119086951 0.4456465840738488 F F F  
0.3717873538880170 0.4425949829247386 0.9238367654357305 F F F  
0.0178281934868707 0.9396238685170957 0.2846083968828026 F F F  
0.8857533534930440 0.8563662976733255 0.7903810465502943 F F F  
0.8847923838844309 0.4420523961532581 0.7866205530848873 F F F  
0.0162155023717716 0.3553469064563757 0.2867918747647593 F F F  
0.3392471826761394 0.8601364174947008 0.9436480872470696 F F F  
0.5221499308183866 0.9466458017702166 0.4162426185979058 F F F  
0.4630030482107017 0.4808290723011837 0.4068208827094182 F F F  
0.4333557478552521 0.3256793850121795 0.8976904835508464 F F F  
0.9663509639365770 0.8184229908137794 0.3003145740729209 F F F  
0.9383691249514214 0.9771776530503757 0.8049128557499117 F F F  
0.9343147835235186 0.3196584391044652 0.8035966712144003 F F F  
0.9673445315816807 0.4779811631499271 0.3061427994876027 F F F  
0.4382065914635831 0.9459676986573697 0.9069999995476294 F F F  
0.4693730761685160 0.8257211964728128 0.3965145793021136 F F F  
0.4661801575595277 0.5181380233496355 0.7421327991569981 F F F  
0.4238466289552960 0.2795541110544733 0.2240709751770211 F F F  
0.9845102578203893 0.7751683565870593 0.9843564069097042 F F F  
0.9240193515323796 0.0207982273686369 0.4869747889905653 F F F  
0.9143360523111141 0.2736430356180861 0.4847482190144277 F F F  
0.9808766950845254 0.5241083350859910 0.9876128951153831 F F F  
0.4190958877166864 0.0250407345274652 0.2312901413750268 F F F  
0.4964797449317828 0.7662378803526622 0.7047546223542653 F F F  
0.3971664495448124 0.4284173478438760 0.6332653645877571 F F F  
0.5071972481320088 0.3593220676648556 0.1260139363350774 F F F  
0.9024449710057354 0.8609746601639614 0.0774836448065486 F F F  
0.0090173678480170 0.9429597121463971 0.5864721934098398 F F F  
0.0033960448845463 0.3543693012334828 0.5746948069985294 F F F  
0.8935488943449883 0.4464330706045345 0.0837490509833145 F F F  
0.5040720961603142 0.9459529044106603 0.1326621386965456 F F F  
0.4063816808324816 0.8636821116686235 0.6396588751494789 F F F  
0.4985258373240171 0.3886598216286643 0.7485893848937408 F F F  
0.4172786056802380 0.4127498099764679 0.2477002392541863 F F F  
0.9962443885613013 0.9075656683307329 0.9541981247398184 F F F  
0.9225170856847242 0.8878521419262526 0.4586877003281131 F F F  
0.9111995359232736 0.4061243871619240 0.4531021852211126 F F F  
0.9805196898483999 0.3905315887088321 0.9590225657982998 F F F  
0.4095623899800529 0.8911712616109142 0.2461676105999473 F F F  
0.5087017498749304 0.8938677276226841 0.7580683533364763 F F F  
0.3056730637257701 0.5162571594741863 0.6970161777282726 F F F  
0.5986814927469553 0.2727959557201984 0.1948867845434208 F F F  
0.8169981586987589 0.7740205305229750 0.0000498193009051 F F F  
0.1005918826333385 0.0220447066632374 0.5022325374023566 F F F  
0.0972950715513150 0.2715075590156104 0.5088978573463052 F F F  
0.7990300138724820 0.5259854199874994 0.0087856093597622 F F F  
0.5946590621195682 0.0232610868603018 0.2204469140322018 F F F  
0.3073018493535358 0.7900203051513586 0.7119432705269162 F F F  
0.2737262550921287 0.4275330613523494 0.5591362766664361 F F F  
0.6312438793537822 0.3686001009655016 0.0617782479567808 F F F  
0.7782540932197364 0.8571813094185927 0.1460187253492435 F F F  
0.1353819724837706 0.9384610362011969 0.6482395558040110 F F F  
0.1256516271958859 0.3591047935383500 0.6528787439572028 F F F  
0.7697453210629916 0.4384936670430264 0.1524900966200207 F F F  
0.6287696058189951 0.9500702475825520 0.0623016006223409 F F F  
0.2849705844558912 0.8709229058200947 0.5575405624513436 F F F  
0.3344377224716126 0.4555469259161598 0.3880694681458863 F F F  
0.5635460614777159 0.3323353901960644 0.9008334442590780 F F F  
0.8373005801544480 0.8430930294813379 0.3217955537865933 F F F  
0.0687694161252850 0.9655395922280405 0.8132362106124802 F F F  
0.0628876279018371 0.3394144317107006 0.8236584044504980 F F F  
0.8369458958696754 0.4689206008488611 0.3167158763349320 F F F  
0.5657804906648494 0.9732680295815683 0.8917588093280955 F F F  
0.3385762296931532 0.8293233668263795 0.3881306252690848 F F F  
0.2517499260942202 0.3524473277171651 0.3965148571693931 F F F  
0.6327873498907266 0.4471923922837178 0.8968090881944235 F F F  
0.7537516714102921 0.9447668581239412 0.2958923152978699 F F F  
0.1417290216761131 0.8528810316969029 0.8036967568945883 F F F  
0.1430675874136114 0.4456587406280477 0.8058716587636283 F F F  
0.7725109857738488 0.3521258256498427 0.3075652799303725 F F F  
0.6252320416657042 0.8543795076964358 0.9189282267205314 F F F  
0.2753549095889625 0.9481853080677993 0.3926549108468720 F F F

0.3923015420107916 0.5450938536189369 0.2733651954264076 F F F  
0.5049369934127981 0.2547857268698195 0.7694366405532449 F F F  
0.8958317414601353 0.7562509723760300 0.4393876107277777 F F F  
0.0059413037631870 0.0428055717338012 0.9414870384494805 F F F  
0.0010037783021986 0.2572883339582290 0.9463147431496282 F F F  
0.9013324055208756 0.5415530591897166 0.4469839421065913 F F F  
0.4824531252407525 0.0278494142634642 0.7656891124516463 F F F  
0.4053301026099376 0.7552409558250730 0.2614479317084246 F F F  
0.7041566094687752 0.2377084183646190 0.3082841152904763 F F F  
0.1930731371873122 0.5710125902178476 0.8010373268000208 F F F  
0.2049519467426606 0.0622044661179544 0.3900654728441495 F F F  
0.7029418200626694 0.7476047626078000 0.9042220231638538 F F F  
0.6917558356504472 0.5671656076337541 0.9042612993726351 F F F  
0.2073137856035814 0.2280358158044820 0.4132029849691818 F F F  
0.1994254716395290 0.7324167014128022 0.7895647652207174 F F F  
0.7066953851062365 0.0688090740641059 0.3074209155755696 F F F  
0.5887828605045513 0.2559071672349518 0.3955437526327543 F F F  
0.3188189034933799 0.5651443907192757 0.8998784932169812 F F F  
0.0897814988633741 0.05060181069464446 0.3050672653400639 F F F  
0.8154323540042512 0.7431456113214239 0.8037617725551200 F F F  
0.8045522754697885 0.5482774226687752 0.8098868063731217 F F F  
0.0961401009786087 0.2491494690032212 0.3104845062651052 F F F  
0.3095201098721674 0.7344237741039166 0.8948875656183617 F F F  
0.5966540980659474 0.0571086159893071 0.4147486049221101 F F F  
0.6062443155513222 0.1512181902185503 0.2712410131320127 F F F  
0.3008810403658515 0.6561763613267715 0.7280372295604849 F F F  
0.1066167022486155 0.1469938063363969 0.4421143696580572 F F F  
0.7913182551442688 0.6500482943262327 0.9427207947697767 F F F  
0.5293288886946570 0.2568844972040836 0.5733732360267467 F F F  
0.3687232449425295 0.5269486690622429 0.0800884499537915 F F F  
0.0253389470359622 0.0292966754900377 0.1357398817387079 F F F  
0.8808194713771371 0.7721232732940564 0.6355645244675117 F F F  
0.8719356365675139 0.5318532992370848 0.6402676354109857 F F F  
0.0284992752881834 0.2646074945513419 0.1409867924084836 F F F  
0.3699056865001538 0.7637806655010380 0.0693311613263035 F F F  
0.5227962865380107 0.0279913574918282 0.5758972884529996 F F F  
0.4567853066706391 0.2428132616855905 0.4105013266173785 F F F  
0.4494159723199047 0.5514908291580269 0.9333765434183476 F F F  
0.9576083825234036 0.0585328602844584 0.3004969713622572 F F F  
0.9482324101886448 0.7383426532732074 0.7984704584891560 F F F  
0.9356017205159119 0.5645231135750208 0.8082434550482844 F F F  
0.9645323864575275 0.2332108707027345 0.3091327238061012 F F F  
0.4367545671745958 0.7742288576399616 0.8972065881724873 F F F  
0.4648515042341614 0.0676077494629794 0.4073169738410058 F F F  
0.4929602223533180 0.1432110967409486 0.6661665386653013 F F F  
0.4063417454970661 0.6476433793541858 0.1467722711481798 F F F  
0.9922780328088976 0.1487914045525471 0.0598961953989132 F F F  
0.8965091727356551 0.6504304234111942 0.5594054215966011 F F F  
0.4055958368029806 0.2433438155800189 0.6385579844671057 F F F  
0.4931256188863244 0.5460549866273468 0.1473662547503807 F F F  
0.9034699769537653 0.0494696823576106 0.0687470842538502 F F F  
0.9984467677952082 0.7368254583812330 0.5610498970459332 F F F  
0.9951937316175758 0.5620732366995185 0.5851400080978877 F F F  
0.9038044830280754 0.2485554173717688 0.0820899415699401 F F F  
0.4977500105933643 0.7451497498454742 0.1194979112208330 F F F  
0.3971802181042747 0.0551159349398063 0.6204551481426392 F F F  
0.3076904843578845 0.1540090077489396 0.6131114152248784 F F F  
0.5846208201634084 0.6454891263094424 0.1405448369479174 F F F  
0.8143721940834823 0.1499840654046594 0.0673708863200133 F F F  
0.0972514262309261 0.6474558500143317 0.5729558886988997 F F F  
0.2944596480413892 0.2775466222819531 0.5474821747698897 F F F  
0.6025662385109101 0.5310178334434070 0.0429947572622567 F F F  
0.7884647199864148 0.0338838027114576 0.1585090499002817 F F F  
0.1075326015414149 0.7700127389550389 0.6567771274175342 F F F  
0.1120144251178843 0.5255192354294564 0.6551861741358920 F F F  
0.7831723041331884 0.2669314997632881 0.1540427206283823 F F F  
0.6242971560526556 0.7631103518535767 0.0639764441727593 F F F  
0.2782120413860909 0.0312764619485009 0.5490228490174616 F F F  
0.3303873868757492 0.2467364230232221 0.3579409553317845 F F F  
0.5685594670765255 0.5616023772283611 0.8496905302010163 F F F  
0.8314897027372865 0.0478187702049695 0.3494271194579852 F F F  
0.0757742929889460 0.7408139333535004 0.8479019647884982 F F F  
0.0654813832842152 0.5515332025159481 0.8387407560666205 F F F  
0.8337247993560766 0.2351825250772777 0.3339122161474606 F F F  
0.5738417193900460 0.7316345786839307 0.8843745145832074 F F F  
0.3349808361279472 0.0667168882977123 0.3745925149003568 F F F  
0.4102608237214795 0.1538352608533344 0.2787330004130695 F F F  
0.4735190662181168 0.6478473810290737 0.7949215786035424 F F F  
0.9054347657171107 0.1457036328552803 0.4306114209792682 F F F  
0.9972967333005940 0.6491218033700505 0.9293650462986918 F F F  
0.4288320814202856 0.6089702048806989 0.5894489336199552 T T T  
0.4088418721041620 0.7258927497351210 0.5708509875085568 T T T  
0.4782456834669664 0.6496614301484069 0.3488205732038345 T T T  
0.5456292767057510 0.6924321908043697 0.4975752663415880 T T T  
0.3032215815784791 0.5824151733120912 0.5251688009936448 T T T  
0.5748307851853380 0.6389971130234744 0.6637278387165058 T T T  
0.2264481169330145 0.6364489312711852 0.3711824697679775 T T T  
0.2921794508985244 0.7095137160190345 0.4935246313487707 T T T  
0.1351314080616809 0.6294941787424039 0.1976352896773581 T T T  
0.1204042602219379 0.6589706306094665 0.2894733317920912 T T T  
0.6273826177838870 0.4682218459692535 0.3081087215530047 F F F  
0.2712344230622321 0.3207949979621105 0.8066852458756628 F F F

0.1304562326783270 0.8270636426515097 0.4063792917702500 F F F  
0.7743233696226355 0.9700882619189741 0.9027811478580006 F F F  
0.7735591413567207 0.3294114537757551 0.9045861484077236 F F F  
0.1254088134627196 0.4700547134887145 0.4066213047753209 F F F  
0.2771598969219582 0.9843546457930898 0.8023191323535741 F F F  
0.6276485312238052 0.8245366513461221 0.2987281913785509 F F F  
0.5229444151216569 0.4413820039660123 0.4646668232598188 F F F  
0.3722401567218583 0.3632105493830196 0.9546585289360152 F F F  
0.0278552300187158 0.8609138335327913 0.2519036512922597 F F F  
0.8782775093958008 0.9347535661040212 0.7536300163012015 F F F  
0.8752966734283660 0.3635493268475258 0.7517750801910381 F F F  
0.0256852127517959 0.4339688548148999 0.2529757372013037 F F F  
0.3668849283657636 0.9362927411565494 0.9606611736145041 F F F  
0.5290031164841622 0.8679885912333418 0.4496772279471983 F F F  
0.469799099694497 0.4489032649041036 0.6778320947993990 F F F  
0.4316670247065986 0.3520254601230732 0.1686669595765409 F F F  
0.9775963025380250 0.8494630754752208 0.0351721148364135 F F F  
0.9341899633773494 0.9477248164544960 0.5399718820794135 F F F  
0.9272433611604924 0.3474150521092696 0.5346672735994247 F F F  
0.9689331821971905 0.4507661825311828 0.0392745064149693 F F F  
0.4279477966558929 0.9541297238146953 0.1723635341381069 F F F  
0.4825071207273908 0.8446465371209086 0.6689478185388609 F F F  
0.3185264742492961 0.4403185115892825 0.6596479402300588 F F F  
0.5846347576401385 0.3499901457362853 0.1577099942985143 F F F  
0.8249215991544361 0.8493780589599140 0.0473339581336063 F F F  
0.0864687132591584 0.9486800689778789 0.5524324391624162 F F F  
0.0824734603754393 0.3470240369172544 0.5518838354930153 F F F  
0.8153362177314705 0.4513051249717321 0.0534354240010160 F F F  
0.5823587830245671 0.9522391437592290 0.1621410781883128 F F F  
0.3270069000601268 0.8611901560799495 0.6614203669392253 F F F  
0.2669573685454054 0.4285457542444746 0.4378102964142556 F F F  
0.6299357557242402 0.3697162308922870 0.9386924374426542 F F F  
0.7700521669908653 0.8666109003334199 0.2668466027482026 F F F  
0.1358790564331329 0.9317723247434628 0.7707612657488880 F F F  
0.1306746752475689 0.3674149114112382 0.7748816256567537 F F F  
0.7717352223202454 0.4312392743747537 0.2747956341442404 F F F  
0.6285554147130554 0.9346419301841564 0.9413129662427266 F F F  
0.2765861471285760 0.8714713022647871 0.4359645183694312 F F F  
0.4015426115198935 0.4717857236728946 0.3286772811736185 F F F  
0.4993894285631981 0.3265259026134757 0.8284103433646450 F F F  
0.9055974854581024 0.8274147491910213 0.3801490907590832 F F F  
0.0021548036314414 0.9722177988060281 0.8792039176581170 F F F  
0.9948880938309657 0.3276025893660446 0.8837103847561423 F F F  
0.9043386263804862 0.4723681362117773 0.3819181950001251 F F F  
0.4981700588169318 0.9597785265770824 0.8295754797699999 F F F  
0.4060034049720755 0.8275083695578971 0.3214367333706107 F F F  
0.6245715843986162 0.2300032391381848 0.2925010820049465 F F F  
0.1259139268314229 0.0701546627045175 0.4106905572316606 F F F  
0.7805342279861947 0.7290382927722447 0.9130875766382189 F F F  
0.7716893058562775 0.5725121778923636 0.9164928579820568 F F F  
0.1270120534831563 0.2248286487243902 0.4185413001518583 F F F  
0.2797919432026461 0.7280322718148895 0.7804018621933508 F F F  
0.6265687375281885 0.0746647406401735 0.3028896836136425 F F F  
0.5225872547441028 0.2793475989343932 0.4557789591324379 F F F  
0.3741096229507335 0.5223022681944300 0.9565907374283924 F F F  
0.0225985865376757 0.0194519947204128 0.2571726800181580 F F F  
0.8822037342376348 0.7772489324658736 0.7578417432425653 F F F  
0.8740469421341359 0.5216610374506985 0.7618963324355619 F F F  
0.0265632293582669 0.2754613507319874 0.2624678814693766 F F F  
0.3654467093525469 0.7820429111627192 0.9486964877649200 F F F  
0.5267778526831393 0.0252303080032164 0.4535446005329717 F F F  
0.4825907987578617 0.2241909516080653 0.6612524356469294 F F F  
0.4155745016918928 0.5670422744499746 0.1595203760866752 F F F  
0.9811380994627257 0.0684070841609028 0.0513069019736818 F F F  
0.9188844427147842 0.7284379783030275 0.5490567218213798 F F F  
0.9172714587941186 0.5715849112768510 0.5577926470144092 F F F  
0.9808132202776108 0.2293773612222907 0.0570369877791634 F F F  
0.4206404813407119 0.7277636052790015 0.1462607607101774 F F F  
0.4735750718013563 0.0642288492146008 0.6574752613122783 F F F  
0.3258990059937474 0.2320395812105431 0.6379064891682447 F F F  
0.5712126100869810 0.5650785035059300 0.1438153548112098 F F F  
0.8253358522784211 0.0690597345648882 0.0631483642319353 F F F  
0.0781620983973568 0.7268013634425259 0.5627735777407139 F F F  
0.0747929449904987 0.5685525662469146 0.5684053206225244 F F F  
0.8257238998284606 0.2309006739273798 0.0647751167692476 F F F  
0.5751519274264112 0.7264363716720297 0.1439839813988684 F F F  
0.3191816603836983 0.0742643441347681 0.6330422015276653 F F F  
0.2717496989226618 0.2757696688182776 0.4293140805726381 F F F  
0.6231848405921738 0.5267029980988838 0.9249143447298778 F F F  
0.7710878497371851 0.0240871121711379 0.2773429186055409 F F F  
0.1313407558303012 0.7737272206787651 0.7741428976231504 F F F  
0.1304401964741828 0.5250465279117833 0.7763235661155790 F F F  
0.7735500806542106 0.2729121676011914 0.2759081552034388 F F F  
0.6302350744308285 0.7735094560039713 0.9411402426751181 F F F  
0.2735368904795621 0.0274377966865913 0.4264599118037538 F F F  
0.4048670896350544 0.2313898842679905 0.3181750561293271 F F F  
0.4880244933122526 0.5705483517229339 0.8298638337524551 F F F  
0.9042881273114958 0.0679106917959871 0.3917269744416103 F F F  
0.0014837594594326 0.7265762321657689 0.8891313203193079 F F F  
0.9956531001762272 0.5712032671392322 0.8896190812872291 F F F  
0.9043934352190917 0.2230538361626273 0.3896586223571319 F F F  
0.4070807590109737 0.0774952446816357 0.3228098463324542 F F F

Structure H2O2/36 S=8/2  
1.000000000000000  
20.1473052208877697 0.0000000000000000 0.0000000000000000  
0.0000000000000000 19.7681594983396742 0.0000000000000000  
0.0000000000000000 0.0000000000000000 13.2309279702280254  
Al Fe H O Si  
2 2 8 200 94  
Direct  
0.2782411040225739 0.5758377591074855 0.7876223075234975  
0.4960518283528454 0.7310486613992618 0.8225686209688856  
0.3314307707891017 0.6536609290166767 0.5690924638023442  
0.4618022606529582 0.6740691254464670 0.6159758488573209  
0.2352955730243337 0.6039671164795153 0.2347775985331321  
0.5521423344497400 0.6877516549215464 0.4599516763005324  
0.4916992903718795 0.7367640153303108 0.4353039079396432  
0.2858177932438005 0.5514854583642848 0.5912033340344134  
0.5776728474969960 0.6128130396125033 0.6737456800198506  
0.5413026488986727 0.5657220158280692 0.5959484997689264  
0.3100910848701871 0.7445467331087479 0.4592832159621007  
0.2356925267283701 0.6755415367634769 0.4038074439719906  
0.7070433532264883 0.4649271798072879 0.3234977840129894  
0.1933186857720088 0.3214738780745726 0.8151108852594091  
0.2116301436677636 0.8325547483734270 0.3959036796443701  
0.6945269063418334 0.9705117596000880 0.8896467017204415  
0.6942158577373877 0.32856444566059301 0.8964583618717329  
0.2055334978597619 0.4771000383048270 0.4004165828935978  
0.1995947314060919 0.9743660209111487 0.8154101967547940  
0.7085423297846669 0.8211439450288495 0.3051500360339027  
0.5935491656237821 0.4718091508529260 0.4194522741707323  
0.3058000424052620 0.3303818583410411 0.9178586452141306  
0.0985422346557983 0.8317982015442437 0.2927011093314922  
0.8083091534661050 0.9661749530366812 0.7901904013220753  
0.8050208273797188 0.3350135185568076 0.7923317954651811  
0.0966107798162406 0.4647822727731714 0.2915024397461203  
0.3131076745524738 0.9850423632426699 0.9154024333898587  
0.6002943045899343 0.8378138030502686 0.4131483073328230  
0.6101760864676866 0.5371397302495416 0.2443948112151606  
0.2983672737997521 0.2527412644651878 0.7503415489430407  
0.1109986697390711 0.7575782818801216 0.4598148415835213  
0.7964573638788500 0.0401186058173538 0.9583725869161078  
0.8002537147352774 0.2587529240047481 0.9574419595464329  
0.0947303418062052 0.5402632955417812 0.4579143922658007  
0.2953445323481521 0.0545431061460609 0.7466781693964142  
0.5967362751956505 0.7569496639740281 0.2549652339002538  
0.5997070844991540 0.4021832261878400 0.2503905053812988  
0.2986864068424952 0.3856357766644039 0.7394989875999701  
0.1045849615324540 0.8922755370733723 0.4686730053136140  
0.7985013519534154 0.9050944797785155 0.9651539861184121  
0.7985835997360796 0.3930377728572361 0.9724087775346534  
0.1028569015015198 0.4058003132588840 0.4696550384652238  
0.3115780446636897 0.9224421126783581 0.7379233289619337  
0.6047032227766842 0.8908928890408128 0.2310325631463241  
0.5223368253848557 0.4726763817730102 0.5848739802530036  
0.3821518036605024 0.3582179893386269 0.0715647788690687  
0.0265581639935873 0.8538119746664520 0.1305609677828503  
0.8818800110874896 0.9399907442638903 0.6317775599223195  
0.8776684598280552 0.3560178501240706 0.6306733574935391  
0.0238231998273930 0.4391422595989762 0.1303383510241243  
0.3747619726995812 0.9494066988896336 0.0843858076285023  
0.5270857466945829 0.8604112416050690 0.5708077723791989  
0.5229770725960164 0.3611893071243432 0.4715803342251005  
0.3730751331671758 0.4490093870402612 0.9251243129064368  
0.0172216624050651 0.9391076234993139 0.2864139721344736  
0.8872613550073769 0.8565521254084867 0.7908516804400166  
0.8865317441263731 0.4411006252983360 0.7882694723451873  
0.0192275453589158 0.3546465868305782 0.2882941535818687  
0.3399699210900584 0.8568895174825002 0.9467839242272986  
0.5197375182472366 0.9470287995122468 0.4162014288041921  
0.4622681307802151 0.4735420654464293 0.4097644541715327  
0.4344402222395156 0.3338103773913500 0.8884580253369081  
0.9671564454127477 0.8170747337540186 0.3024036913036061  
0.9391031697918688 0.9776627736360755 0.8050164797640075  
0.9354980583195396 0.3182957387420193 0.8031568251619804  
0.9658507372013007 0.4755069455769181 0.3019733032434547  
0.4392273812848460 0.9430263729071749 0.9134165578091380  
0.4710809542159155 0.8227794946116447 0.3978830785505758  
0.4661052702619214 0.5162190131127515 0.7497204381005855  
0.4203637552019331 0.2797093113767465 0.2194006851481250  
0.9805300111225107 0.7747473020057699 0.9867019162142187  
0.9242449238424002 0.0200232980549348 0.4866572508307481  
0.9154106148982978 0.2735880380585048 0.4857274858691313  
0.9844987013226801 0.5229569278760378 0.9879229446330015  
0.4175029448858272 0.0305160032149213 0.2270208523188774  
0.4936872404163678 0.7605106004005507 0.6925851309675503  
0.3995061199404716 0.4306078086213420 0.6316677598678554  
0.5085217194520422 0.3557627042257798 0.1238871753200034  
0.9002709993486848 0.8626685076700215 0.0762862649887409  
0.0093624904500909 0.9411676931496891 0.5844639679898399  
0.0038338497683929 0.3545139573427901 0.5767134801796268  
0.8961254128525471 0.4454095258183348 0.0817552096376816  
0.5030980250886069 0.9472945175352324 0.1358749669656402

0.4033970178253908 0.8594255982100077 0.6341734851172716  
0.5046241889653144 0.3878772805972270 0.7365952860886184  
0.4201115716847524 0.4124676399569611 0.2453617135708898  
0.9958979033475523 0.9066885500865083 0.9535948714932492  
0.9208844193645601 0.8871620134883339 0.4584850466282540  
0.9122449310900930 0.4057909962099203 0.4535111072366315  
0.9834269178914908 0.3898503536019715 0.9564169082808539  
0.4107656088753661 0.8989456842183772 0.2597745229142966  
0.5027205276687287 0.8840646258461607 0.7621738829543211  
0.306697057744102 0.5166070903759084 0.6993766176546645  
0.6033555249211981 0.2743527799976101 0.1955519692105291  
0.8143491441747114 0.7740234328894778 0.0010979137158171  
0.1000881092127720 0.0235037438312690 0.5048708293054015  
0.0971876651442472 0.2733772254413358 0.5055342037146182  
0.8010867189485859 0.5250007593512415 0.0069934836951753  
0.5955965088148286 0.0255706155932025 0.2164628865040834  
0.3016559872868185 0.7902914816204003 0.7109931960480751  
0.2760076315594833 0.4310361739744289 0.5573101958244493  
0.6320640445400248 0.3705431629143462 0.0617532101022919  
0.7765563156940750 0.8587884801921586 0.1455822497974815  
0.1352759751276626 0.9386062098650096 0.6485271742149985  
0.1270622736292741 0.3587477769465661 0.6512327834973008  
0.7731579064878638 0.4400607340737684 0.1541483299333801  
0.6259899648657485 0.9506740616581101 0.0583362197729274  
0.2807127355482788 0.8729483598962240 0.5590542305656442  
0.3338048259559563 0.4529147771657649 0.3826669355427180  
0.5645528401566366 0.3365855109422818 0.8983113465474524  
0.8382188865976862 0.8412380577788816 0.3188163147680164  
0.0697223585180186 0.9657274172691489 0.8146483953804093  
0.0647082406100514 0.3352000011681880 0.8218180134832150  
0.8359916486971528 0.4715573961244261 0.3231827581713238  
0.5660109132102105 0.9673382798973753 0.8836969813673965  
0.3401994659512735 0.8310350570767177 0.3955163774943440  
0.2497181162855488 0.3519291632573127 0.4010392352920374  
0.6362698486656040 0.4494371380872096 0.8982451346912116  
0.7560264909257528 0.9449778458042175 0.2986484420516669  
0.1440399625794177 0.8538913905319723 0.8043659593174698  
0.1411615723162768 0.4445984207131818 0.8056146452756145  
0.7766732647390472 0.3521827440426989 0.3071812963105598  
0.6332754773137651 0.8534921409399727 0.9178768101880862  
0.2759343737309172 0.9495837461060317 0.39297461666453199  
0.3951528111918145 0.5437418186232159 0.2760139712944495  
0.5068649328897957 0.2558625160207777 0.7691086929105183  
0.8947847367949834 0.7553495827883235 0.4402662292065137  
0.0065846616144331 0.0421741902253400 0.9429317628197861  
0.0015862442457082 0.2560028063661386 0.9466270925367928  
0.9075974553538892 0.5414152404243190 0.4483863617935427  
0.4783610193504786 0.0183565659186838 0.7613058727450911  
0.4022472105220771 0.7624287104382914 0.2575080528016500  
0.7067287789017167 0.2385780597576673 0.3121046209914001  
0.1938041480981568 0.5684035599979518 0.8059384653296230  
0.2045814346591127 0.0630850648597949 0.3915285797619924  
0.7021567511236197 0.7404089980390722 0.9035595343087055  
0.6942377972625374 0.5698981133315382 0.9046351943348181  
0.2085704691182224 0.2267016856852316 0.4173755084983965  
0.1951802532490008 0.7307018605811980 0.7898172844532191  
0.7072261725728060 0.0686828125758014 0.3067487151254837  
0.5904632303261942 0.2585977471135879 0.3954430688012188  
0.3207993160467764 0.5711862739999835 0.9007901220829133  
0.0898026105316726 0.0499136296777222 0.3070180536433191  
0.8140975694161814 0.7455195344513038 0.8033193564759097  
0.8049089387367561 0.5465007461804258 0.8076374061065986  
0.0993793464123173 0.2483010555307314 0.3081635225217481  
0.3062650262755762 0.7333135708087519 0.8931116340708851  
0.5966077595252783 0.0560266993625023 0.4121295756371632  
0.6079400262652812 0.1528040368486708 0.2731322011424797  
0.2964537147204802 0.6564558734679531 0.7256781945815600  
0.1060213103105785 0.1477493449707242 0.4425693078353230  
0.7966651951436136 0.6493205811712309 0.9404029284932801  
0.5312656353582990 0.2452832995785052 0.5720073558613816  
0.3695540432007808 0.5340756674831648 0.0819728028904655  
0.0265839772959175 0.0286111412568194 0.1370358400194674  
0.8819047828315585 0.7720831744342397 0.6362822425678447  
0.8756969588498548 0.5300518324758210 0.6408439277869361  
0.0290963431606638 0.2643738767524605 0.1411948418178956  
0.3704401480018136 0.7553918681717428 0.0644997937121261  
0.5240194612822835 0.0302020998034182 0.5748539078987981  
0.4580044764701034 0.2529056843331545 0.4075143048658446  
0.4509096741402214 0.5588506506254708 0.9359226595741699  
0.9578419706784165 0.0584614292643900 0.3005208734168590  
0.9464089373125920 0.7363888494567149 0.8010767846344110  
0.9350186864703917 0.5646983023840472 0.8123895337228355  
0.9677705710030322 0.2324876215563748 0.3115119588105820  
0.4339133456039652 0.7701049384342561 0.8886468951042988  
0.4647480223176068 0.0679623400914222 0.4062432484216162  
0.4915372301206825 0.1396044479536342 0.6808840673100309  
0.4168546182800811 0.6488000823271289 0.1603708102148651  
0.9927171394888840 0.1481351383319413 0.0616083238397987  
0.896442443532088 0.6496860716427165 0.5612577752688566  
0.4076623868614161 0.2412300378054404 0.6384283693518156  
0.4954111909546476 0.5419402901031474 0.1480044036426968  
0.9045577035962866 0.0483871217462029 0.0709730363114172

0.9986553235110802 0.7354545927973619 0.5587607322548175  
0.9983637329017976 0.5654254518015033 0.5900161550973181  
0.9043285104870518 0.2481363673182485 0.0823523818200648  
0.4979027633518479 0.7515278881606026 0.1204301185912731  
0.3976842893910040 0.0551675696270757 0.6157370840126231  
0.3079770820089411 0.1539356359599180 0.6162017663254313  
0.5794557969394248 0.6472183846928748 0.1456178861304411  
0.8154559120894851 0.1490302107135334 0.0684618880541160  
0.1004324816322317 0.6495856311345602 0.5754588932772212  
0.2957449523921454 0.2777953889910893 0.5509204841242599  
0.6058634659243836 0.5349056657455260 0.0437026292916086  
0.7890156925471273 0.0327437553796828 0.1586282198728539  
0.1047358090849969 0.7728237952811223 0.6580921185714089  
0.1162767792310747 0.5265428708849943 0.65386697429929357  
0.7835816201697291 0.2657744167980247 0.1546791471112955  
0.6234379758518646 0.7610004532587218 0.0602782080855091  
0.2776711755296391 0.0320585362473724 0.5501043364413225  
0.3309785428801341 0.2490311507757186 0.3609031998271166  
0.5704540226261144 0.5623084275889193 0.8510342226756795  
0.8318272436904309 0.0499099206244576 0.3497097238715605  
0.0730602701596842 0.7455523502346952 0.8504467576746980  
0.0649412780697565 0.5520210806884588 0.8342144280761810  
0.8367342779298315 0.2346036081150256 0.3329400872449218  
0.5731158520119689 0.7360697764283097 0.8765413146321642  
0.3347058271676349 0.0684235572944520 0.3753284147528067  
0.4116908399978207 0.1570548933115275 0.2838998403242813  
0.4775260512193467 0.6467615439089355 0.7850707913554298  
0.9074131011140143 0.1455986365739769 0.4324491063205778  
0.9992481611610486 0.6489505905767157 0.9309706627334094  
0.4107629888848672 0.6038487798412080 0.5920385056488853  
0.3932954692885712 0.7234490559432489 0.5794448657234746  
0.5044783594010072 0.6938575347147682 0.4684688707747465  
0.2817819189941332 0.5844380238371319 0.5335103812205619  
0.5515931659219738 0.6138442927103612 0.6114128938512072  
0.2819043217738504 0.7085605862592046 0.4873552416396806  
0.2602331688574951 0.6335994906442329 0.2806683817871044  
0.2079773788939070 0.6550614205820889 0.3462892088231582  
0.6276933437607046 0.4690919647485081 0.3076420173705245  
0.2734152459146488 0.3220786996168390 0.8056575121471156  
0.1314203101823854 0.8279578960828753 0.4050245165792897  
0.7743714214579757 0.9706991320260507 0.9017189808982081  
0.7744896478050072 0.3287125676078368 0.9057571496574918  
0.1252177463644865 0.4723814674473856 0.4064181760254298  
0.2790505509855299 0.9835056782325208 0.8038504553092900  
0.6285263548866644 0.8270215641982691 0.2984381418426392  
0.5253709948479590 0.4428253540933768 0.4688187202697262  
0.3740998054922388 0.3687816308582668 0.9509809503971635  
0.0274465850039687 0.8605265519971912 0.2524612593368980  
0.8791813503575159 0.9348221813445132 0.7538322374897922  
0.876489982452115 0.3628429442727626 0.7525811521708772  
0.0265295753133163 0.4331536694399221 0.2522471619576924  
0.3669974472593733 0.9331269664125533 0.9646908785601324  
0.5297836044531328 0.8689929799178745 0.4500473221450603  
0.4714992979647544 0.4510575199267565 0.6773628536333663  
0.4326289933771202 0.3520063299439622 0.1656483682784063  
0.9756798416693335 0.8496212005780663 0.0356657010656454  
0.9342426669475812 0.9468427671569775 0.5393477241311090  
0.9279561881881424 0.3474200350260241 0.5356878099625851  
0.9717724982562513 0.4494556903375166 0.0379236975082376  
0.4272668695316229 0.9568072408254886 0.1761293886974458  
0.4793544013203153 0.8406794086016476 0.6647986778206818  
0.3205384269971483 0.4416631955868183 0.6580404343816784  
0.5857868237990257 0.3504999270925278 0.1574196246409062  
0.8229027661485675 0.8497876331768595 0.0466880630009957  
0.0869418826636831 0.9490027071213697 0.5520988964596246  
0.0826448031060830 0.3483596448690300 0.5508277356478420  
0.8177911251315063 0.4509466578496356 0.0534921896966796  
0.5820885024905020 0.9538442954831542 0.1604775403109079  
0.3243374540476515 0.8606075659904969 0.6605729772859112  
0.2664229089309638 0.4290958316456444 0.4362134747464585  
0.6316469975053436 0.3717368477512623 0.9385950515808106  
0.7708092103793371 0.8669682044653537 0.2669349433264237  
0.1368081945511420 0.9325841290096153 0.7709830224052955  
0.1313571918263084 0.3662616652496690 0.7733663315888011  
0.7736858266858128 0.4315842567785876 0.2762222361770551  
0.6298662173959105 0.9339900252079637 0.9380641770432365  
0.2760140809282752 0.8730283814050753 0.4368094799225212  
0.4025333994689166 0.4699461562383264 0.3283172653902682  
0.5019883919283281 0.3293074688366658 0.8231400342310614  
0.9054603229257375 0.8260963734890339 0.3803565557427244  
0.0026372032348420 0.9718850202014357 0.8798857429222001  
0.9965071924877831 0.3258872117344385 0.8826786453143316  
0.9057544901254549 0.4724094328555530 0.3829777190375361  
0.4959982265598072 0.9528423462764989 0.8292196012086599  
0.4056666005373569 0.8303440517567945 0.3243999862894386  
0.6273237237387889 0.2313732002779599 0.2940872119211361  
0.1254774553100527 0.0707565061605919 0.4123491420664599  
0.7810223809068404 0.7278426876451928 0.9126683887569694  
0.7744992695464313 0.5722848859248624 0.9150997483393369  
0.1280493070631516 0.2250508304711638 0.4182482285188704  
0.2752212180852530 0.7282611290328872 0.7799389313736720  
0.6272969873384550 0.0753618216634726 0.3014221325127529

0.5256383067342743 0.2794005363448719 0.4606863432929691  
0.3757416348107538 0.5285949246872989 0.9587964008730767  
0.0228479965872338 0.0187947901560289 0.2584519981951092  
0.8823124948493398 0.7773728279969075 0.7585577446368313  
0.8756767467838604 0.5206440558292436 0.7626586559499395  
0.0290254089558809 0.2749605957968190 0.2627689455948565  
0.3646321523323652 0.7781424001839327 0.9463453651851335  
0.5265194627156013 0.0257972057363439 0.4524818665098186  
0.4837958301314637 0.2203339474720940 0.6644665759060454  
0.4192924072493835 0.5676665643616048 0.1647518187290060  
0.9820943320298730 0.0676752406634402 0.0529329692515064  
0.9189166527194880 0.7276335508315275 0.5495773355439157  
0.9206232718555389 0.5717010192839569 0.5599210915386951  
0.9814158261106428 0.2287646771903746 0.0576922122387604  
0.4219659289321130 0.7293584486515891 0.1489516126286528  
0.4730226899637059 0.0614941636355810 0.6584280731899325  
0.3276158438925836 0.2316637051651039 0.6402374026566188  
0.5723071665691842 0.5658773271675429 0.1447977172818242  
0.8265752037466674 0.0681452392547180 0.0639802518134351  
0.0785889787780690 0.7280378806157839 0.5632408153981368  
0.0778226470236490 0.5706728429803034 0.5692469352377234  
0.8263354286775357 0.2299857110610425 0.0653481165261598  
0.5742618018653063 0.7287025414905057 0.1438448701331515  
0.3200054298002484 0.0740418368404907 0.6336038970944478  
0.2719131481042528 0.2760263188701106 0.4331112915120992  
0.6261649516289731 0.5290114474972334 0.9255868374873731  
0.7720971882238308 0.0243118383289325 0.2779001045885356  
0.1289082900431888 0.7754738884814948 0.7753219790312550  
0.1307281721498062 0.5243263614894703 0.7761617150377366  
0.7761600178848288 0.2727536090323099 0.2767556626862822  
0.6313672397239705 0.7723073894370112 0.9379188701607170  
0.2733978886073157 0.0287308736630291 0.4272955584393843  
0.4050515727241316 0.2352444743500119 0.3188942629498525  
0.4907409993364230 0.5716129339255214 0.8314470400126860  
0.9050457356611817 0.0681248582493605 0.3923273700826269  
-0.0000264882458407 0.7266090520131909 0.8921686594556226  
0.9969488041987290 0.5713425350491567 0.8907875118711399  
0.9068440776125619 0.2227826090872704 0.3907087031802758  
0.4065865986670516 0.0799039306577208 0.3230662075880662

Structure 37 S=10/2

1.0000000000000000  
20.1473052208877697 0.0000000000000000 0.0000000000000000  
0.0000000000000000 19.7681594983396742 0.0000000000000000  
0.0000000000000000 0.0000000000000000 13.2309279702280254  
Al Fe H O Si  
2 2 8 200 94  
Direct  
0.2764821483188883 0.5761816147192707 0.7867947849274128  
0.4972314260286486 0.7311527551543200 0.8235126051629548  
0.3350167407034363 0.6518885319467812 0.5721492025644349  
0.4654200335630985 0.6711269951045800 0.6190993530012537  
0.2382117410658072 0.5718230682501566 0.2622197266413791  
0.5543884167563637 0.6872258780380045 0.4658160924422111  
0.4925749200728868 0.7362609172723417 0.4439708421735901  
0.2789761829561235 0.5524116424133247 0.5850338834319337  
0.5886642968817044 0.6060553484471600 0.6651464566774700  
0.548376852443510 0.5576320680481972 0.5948390171265074  
0.3061511183752894 0.7443488731542238 0.4464002034364842  
0.2498995318659362 0.6859834017416951 0.4337606155794272  
0.7085830662597554 0.4685163815326402 0.3213983597115532  
0.1937189892870723 0.3220456542090974 0.8156428519319766  
0.2104163860427845 0.8351302853802667 0.3959893209016545  
0.6944388578975401 0.9702063722982804 0.8929879636065401  
0.6944580995959623 0.3287237672801733 0.8940854939345535  
0.2074958143893828 0.4764496982552169 0.3950131499283058  
0.1973022154980649 0.9759843874463658 0.8156414746508768  
0.7075668547811839 0.8218642841107986 0.3068875588272871  
0.5955552019177744 0.4703346057332965 0.4191298126965005  
0.3060255956058445 0.3313119415739681 0.9183021634290944  
0.0977548405499314 0.8313214492726334 0.2935583930046628  
0.8067571080109891 0.9652593610627210 0.7905330651491721  
0.8054498719987151 0.3357092872475325 0.7898827694983711  
0.0980623365726313 0.4639974319305731 0.2898442743285428  
0.3098665062155250 0.9845205721092741 0.9176444227759266  
0.5989651784088647 0.8371236417084660 0.4158845588712718  
0.6091237842906876 0.5383331469384200 0.2452621781582296  
0.2983329102954624 0.2524536786762757 0.7514725636628673  
0.1122814694656736 0.7565927603399655 0.4595991057555239  
0.7969659929760958 0.0410020467294389 0.9569065931077040  
0.8011668670559492 0.2602049370497468 0.9557602461978937  
0.0968316937969064 0.5388334285111124 0.4569105778236668  
0.2942179780872580 0.0557854445454398 0.7491767648814438  
0.5962641262304519 0.7572727168572595 0.2562173439859239  
0.6027340949063306 0.4031476121491760 0.2479506098867975  
0.2997006585295684 0.3846713033657393 0.7380677253863904  
0.1014314023396459 0.8909010483942450 0.4707000790367526  
0.7995798171638652 0.9061064473192378 0.9676905634056330  
0.7981961946863128 0.3946884987825294 0.9686862956728531  
0.1064095878866424 0.4043459164285290 0.4679398567977507  
0.3090014962542340 0.9239785657056069 0.7378114781366666  
0.6032759457234917 0.8916277557376266 0.2351041051160130

0.5225597169213899 0.4673465818098468 0.5823252829882299  
0.3821332844811939 0.3598828676193196 0.0726055630316200  
0.0273935947834993 0.8550095423595554 0.1304590072270860  
0.8801951651456453 0.9403832550394218 0.6316019203706958  
0.8794616795668271 0.3568642054658407 0.6298669317602978  
0.0234523701155870 0.4401714339543906 0.1302648717909263  
0.3736880271509211 0.9468514251469692 0.0849634483156168  
0.5263288800815108 0.8628546460493186 0.5738628539114893  
0.5181216690463092 0.3615674830045261 0.4561381518645151  
0.3771535414478583 0.4478767190105967 0.9209352807272342  
0.0182255921524489 0.9398960949176756 0.2871609601721998  
0.8867877457211952 0.8565774083086819 0.7903439584415506  
0.8871209115924638 0.4419277238699785 0.7875954338843193  
0.0188342597018154 0.3552115405248106 0.2877613845350235  
0.3447810637750760 0.8577214645110025 0.9398872396057169  
0.5178930177540264 0.9462454817913167 0.4153193018134355  
0.4653024480704384 0.4796567364669585 0.4046483241676410  
0.4349316903162562 0.3297287426885259 0.8922989339808054  
0.9661459116962005 0.8186110106610718 0.3009928782841556  
0.9372861842677424 0.9780505078960819 0.8052418070792450  
0.9358237710499088 0.3189848851303357 0.8032246929430455  
0.9680558452722530 0.4772537483499267 0.3040753663053922  
0.4379738443184434 0.9522809604848476 0.9138359097780551  
0.4698276403309226 0.8215680082377816 0.4026490302581150  
0.4686283344575199 0.5160320093676092 0.7453867462239162  
0.4201144296817102 0.2798788113391662 0.2197047715921381  
0.9811895247667156 0.7751337415046590 0.9875874965674896  
0.9221505764761682 0.0209194432645900 0.4866996947713137  
0.9166128735726244 0.2738197158232548 0.4853668957446052  
0.9829606893493321 0.5235324108761502 0.9879134604730156  
0.4146794792615633 0.0263953162704811 0.2300621599138560  
0.4917058444118224 0.7652759221617567 0.6985726248040690  
0.3978234521914567 0.4322462050337535 0.6284817390378391  
0.5084641347811131 0.3570635141480537 0.1260819092541081  
0.9009184102974803 0.8629826654193543 0.0785890940204436  
0.0077302044411907 0.9429294690093927 0.5855371661282393  
0.0055014833620652 0.3553668689221125 0.5742624271555117  
0.8958287405840172 0.4442196635685356 0.0811007397354464  
0.5020628956913080 0.9461907491614987 0.1366729518500875  
0.4023889658129159 0.8624080433981468 0.6354022270288330  
0.5002161169107219 0.3862193193695342 0.7369713009538326  
0.4191081619614308 0.4124024969521494 0.2477271517308756  
0.9949648654109637 0.9070542363628272 0.9533815297671380  
0.9206679837663255 0.8880716130554559 0.4583153475233323  
0.9128084788325618 0.4058879762363002 0.4522139410100864  
0.9844367911465964 0.3903772069335774 0.9561712647224331  
0.4106210213276116 0.8939605628219508 0.2585239064683041  
0.5000533728881146 0.8903415976057032 0.7639407635271529  
0.3034099275787103 0.5159838475622124 0.6999580431195802  
0.6024283819768181 0.2744420673874949 0.1965838414926588  
0.8168480726075593 0.7745039318191246 -0.0000805505221567  
0.0983579106228878 0.0231162356142487 0.5020719550514920  
0.0988974193794127 0.2727930480227524 0.5064598843777273  
0.8022157455495492 0.5259485869091099 0.0072763179050124  
0.5939162835179647 0.0260403278698078 0.2155787279658475  
0.3025471155462516 0.7913986731819543 0.7158407344018703  
0.2734462668510092 0.4306965574031781 0.5572882946071541  
0.6318682061788665 0.3685828837359828 0.0601498336458428  
0.7766209409777318 0.8566214614595353 0.1463374248086879  
0.1341045051875301 0.9400684789384407 0.6478497569034058  
0.1280319028149902 0.3593333165576969 0.6511499884417125  
0.7722809285213218 0.4391955495738857 0.1515100503051511  
0.6258392881945466 0.9484566483788841 0.0610979034602578  
0.2793804845896454 0.8713051704544946 0.5608689399940093  
0.3363433478993250 0.4560518009645237 0.3881183811848464  
0.5648490218435760 0.3365426358028867 0.8957163595301953  
0.8370726895379701 0.8410947116641028 0.3209207215518689  
0.0677170323147564 0.9659467292470129 0.8133140650223364  
0.0650538447889268 0.3357320643171848 0.8208014157639828  
0.8380166085552057 0.4694073693844104 0.3176172482653362  
0.5659626022968243 0.9699225472791210 0.8880089044164698  
0.3383308407973034 0.8286213230294783 0.3957591931392509  
0.2543406519822424 0.3520440218519338 0.3978052255701523  
0.6363565136439729 0.4494878091386068 0.8988390344008923  
0.7559932674613054 0.9452047605203945 0.2964930441266481  
0.1429672705988190 0.8548027813372209 0.8030459114881846  
0.1418115885192225 0.4451287998835712 0.8059175741597429  
0.7729200010107852 0.3527291918966302 0.3066386521303605  
0.6308903847979089 0.8539902138566203 0.9160683025305113  
0.2791679320126096 0.9496844625286822 0.3961859548586830  
0.3924752607760413 0.5444109081346461 0.2716857973584912  
0.5066991035266885 0.2543869291169151 0.7688416731956698  
0.8962813561287137 0.7558583093599909 0.4402876086241552  
0.0052768459740392 0.0424910628060814 0.9424618217954210  
0.0023677031519569 0.2564409606941860 0.9460070169872793  
0.9041419213786610 0.5413399045694655 0.4471870650042443  
0.4832781219066399 0.0259791067636870 0.7638019353883786  
0.4024311672217186 0.7575818827673537 0.2634889342496778  
0.7075647290707886 0.2364210726228552 0.3081935296060450  
0.1916756227267303 0.5705409905048713 0.8045796715512834  
0.2044825823308057 0.0608768528964581 0.3915902583955248  
0.7029861750537866 0.7426333434427604 0.9071383584221907



0.6944156389677600 0.5698933405401737 0.9060269773925956  
0.2094078967582891 0.2276835621721247 0.4137431071719194  
0.1961762152500466 0.7323579981392948 0.7951335722479749  
0.7061723440960659 0.0683245818933437 0.3056885700046886  
0.5934809126606245 0.2592226680024868 0.3969803011655889  
0.3183580877445571 0.5681910307228318 0.9002328410303744  
0.0900330149540630 0.0514616853881720 0.3048061930469986  
0.8135559898842294 0.7455472142243909 0.8025135496834661  
0.8045717111408871 0.5467308455860639 0.8076362027694207  
0.0992720643018258 0.2490704725201137 0.3083651869774068  
0.3076814572651888 0.7334568175969866 0.8972081094765491  
0.5960619750601065 0.0546673525054816 0.4115971863269804  
0.6067211754663149 0.1527352000433878 0.2741824201823727  
0.2964551695583628 0.6573331487273841 0.7290250717424861  
0.1076763356705956 0.1478294918035787 0.4419477468437300  
0.7965696965592990 0.6498980443603806 0.9403389908148987  
0.5313217315218357 0.2526361218559049 0.5720342354594106  
0.3708027430769689 0.5314915794713445 0.0778724996973417  
0.0256501791226004 0.02883499139194478 0.1364835961209885  
0.8823865460609246 0.7718408362363812 0.6363128545746509  
0.8751804503561892 0.5309198918414730 0.6404965631543514  
0.0294709335338767 0.2650873810431726 0.1407138059623815  
0.3688796694975362 0.7614953049043232 0.0707667338851259  
0.5232128599383974 0.0290712126203603 0.5737611793963534  
0.4615824347653578 0.2460913160265005 0.4038445511107556  
0.4495738484421510 0.5614779931182535 0.9297008348535286  
0.9579744091123418 0.0587717610708733 0.3011237609100766  
0.9458565640293561 0.7365810246200367 0.8023790418145974  
0.9343814017782012 0.5661227112512978 0.8120667333684564  
0.9679457674065265 0.2326764923169296 0.3106410194169395  
0.4367285174699582 0.7645943726230844 0.8988746119754960  
0.4645383685664761 0.0682759092330393 0.4050696756776681  
0.4905185427007539 0.1423650707065842 0.6682189580279219  
0.4132093086745331 0.6487313507973096 0.1528459528569399  
0.9943043563830654 0.1485414135167796 0.0612916831334879  
0.8980511361112037 0.6499573171970838 0.5602102332491309  
0.4072840859113960 0.2459180070001397 0.6370764763163406  
0.4950625553309825 0.5436463755248364 0.1475934287085663  
0.9039699818813965 0.0507601461724743 0.0717704226746005  
0.9997700621116421 0.7366228634626035 0.5600600561828558  
0.9979976333442512 0.5628990315163566 0.5850074140343273  
0.9049345063022503 0.2477295768081511 0.0809705991099803  
0.4967143237952279 0.7515565487698388 0.1237436399278926  
0.3973046114687375 0.0522578482007959 0.6194182825765842  
0.3111938142441292 0.1541446936432138 0.6176268426654586  
0.5798230651758857 0.6481581386042277 0.1444647153840195  
0.8140367162721465 0.1503913641168484 0.0671411527865615  
0.0995638679727610 0.6482689747347369 0.5737840183100908  
0.2935831061975303 0.2774051940156445 0.5518056286127304  
0.6056861241103325 0.5347974917648497 0.0444232644904924  
0.7877067345586507 0.0338210890923400 0.1567487845264195  
0.1075038873426740 0.7709057994592847 0.6580048672111978  
0.1148338402125763 0.5253525651156814 0.6536216963470696  
0.7848197324428400 0.2680360084251369 0.1530327163563340  
0.6216654234967550 0.7632859332786692 0.0610875454938628  
0.2768352189388479 0.0332966637403378 0.5524296373305211  
0.3335628576076317 0.2467641735332882 0.3643078470711298  
0.5709035839321905 0.5623421771947240 0.8513679750430583  
0.8313413867928703 0.0504955971125074 0.3472122515983334  
0.0727196737956938 0.7461219645958755 0.8497041417147012  
0.0636389774919775 0.5509854370410513 0.8340863212602914  
0.8371615828491847 0.2372157643062789 0.3321681040843241  
0.5748115494499377 0.7342154452648271 0.8763889620830632  
0.3343709445492207 0.0699786154154007 0.3779939062855434  
0.4105542986298708 0.1549609855394941 0.2782779047073550  
0.4806236399979022 0.6471719262678421 0.7777468519381283  
0.9061454961357994 0.1463254946654970 0.4309163092623635  
0.9996647566456671 0.6492990177579870 0.9312562378177618  
0.4044219214778682 0.5985119481588318 0.5946245337924573  
0.3906435955949062 0.7229362998154503 0.5762192431332381  
0.5072954904888204 0.6944656463706259 0.4784326004379950  
0.2764135776788583 0.5886497313382497 0.5332473840387570  
0.5591875221930080 0.6059498843700579 0.6065690525371183  
0.2792733911327969 0.7107805170084843 0.4830175664099068  
0.2564298087200037 0.6142609967792979 0.2911976854243425  
0.2075138174656547 0.6385136802803122 0.3498083330258976  
0.6289687648836682 0.4701504503836506 0.3067029865041437  
0.2738448541133103 0.3223322447134099 0.8059770916158084  
0.1304106815812388 0.8281826423029788 0.4060236970103922  
0.7743055048145675 0.9707666378676257 0.9029824783082948  
0.7747109012260559 0.3296012294306657 0.9032111798519982  
0.1270364795949235 0.4712511819490623 0.4045518804449174  
0.2769317431219404 0.9844254394370280 0.8051920340874278  
0.6274694920938046 0.8272544868919136 0.3010519460433865  
0.5253733480158959 0.4428051536368735 0.4638403366663010  
0.3751458706972017 0.3682621287277096 0.9512787417563390  
0.0273698396780389 0.8613526957842849 0.2524564973694003  
0.8778316028101658 0.9347750249028471 0.7536759545597392  
0.8772622000031861 0.3636420074200250 0.7516949612797208  
0.0270377306221353 0.4337035230996009 0.2519478753989834  
0.3668485413557415 0.9347672694964988 0.9639764063535800  
0.5285659391452424 0.8689274557615551 0.4528645783146353

0.4702497041974206 0.4497512250272335 0.6748120238285815  
0.4323748144943959 0.3526177323091427 0.1669532954780211  
0.9759833526222118 0.8500958874317873 0.0362494180199233  
0.932770470143035 0.9478505080177964 0.5395135909814964  
0.9293405209603707 0.3478551271528565 0.5345657735656600  
0.9714706343969962 0.4497208343653048 0.0375791695813809  
0.4260114764959241 0.9536145081825949 0.1771183752182769  
0.4781356353206241 0.8442691599418265 0.6683846136084882  
0.3189958833059652 0.4422889405223269 0.6573285270287501  
0.5861244413193302 0.3506070737319100 0.1572050892268884  
0.8237750794752752 0.8497640095382908 0.0478669033044678  
0.0851758215239025 0.9494697631939227 0.5519868404772933  
0.0844466654201106 0.3481577070178586 0.5502701290868049  
0.8176947785411735 0.4510723317255467 0.0519070437981283  
0.5808991199520862 0.9533504631243878 0.1620090457155732  
0.3236349352058340 0.8612320323964011 0.6626794768159143  
0.2680998791442589 0.4291305076168813 0.4357803526669088  
0.6317254947804446 0.3713245808934143 0.9371524272133249  
0.7701912273845741 0.8666899052654883 0.2673523892122704  
0.1352875683801345 0.9335241729921333 0.7703136162871850  
0.1320034343304701 0.3668632626334611 0.7733182963901771  
0.7734382605648707 0.4318373954565945 0.2737250847250046  
0.6292077987781047 0.9341254295658502 0.9401277898406442  
0.2759401028117283 0.8729492329275342 0.4387460028714086  
0.4032511090122464 0.4721435878944114 0.3278335554315611  
0.5010878058059828 0.3276835288517255 0.8234457909735178  
0.9052091221075108 0.8268662175570345 0.3804567471938246  
0.0011134257885485 0.9722112151648655 0.8794816123840702  
0.9971182563877165 0.3264017739962971 0.8822775511277480  
0.9060097707995318 0.4723881214243000 0.3815506971454499  
0.4961677819489019 0.9590131668965342 0.8311553900530212  
0.4052268514719254 0.8272122369662938 0.3272990213135113  
0.6277319886499636 0.2310269835620273 0.2939054798593516  
0.1255276908562639 0.0705871625494966 0.4110462847068145  
0.7816054452069695 0.7285810615207726 0.9129641143495341  
0.7746834320935496 0.5727629825064710 0.9153973155141778  
0.1289719744894642 0.2252852871078290 0.4174956606790848  
0.2762367920847987 0.7289221383681400 0.7839714746710262  
0.6262229006687654 0.0750758288046207 0.3010280198250147  
0.5261677640715502 0.2797916305997341 0.4566145369192025  
0.3761112466004018 0.5276400353186759 0.9544885961098711  
0.0228670431125639 0.0194551975367054 0.2580793625741684  
0.8820488325577093 0.7773465814802283 0.7585454554384984  
0.8754705911092883 0.5214430996167971 0.7622820558637027  
0.0290743473431071 0.2754907799349050 0.2623135416458122  
0.3661707234713225 0.7783907758356998 0.9497225548091692  
0.5256034542306089 0.0250023173862338 0.4514389689475120  
0.4833493973380608 0.2235025722906286 0.6610354249642197  
0.4182839014312025 0.5677482639310502 0.1607175253592063  
0.9817381743306789 0.0683495520797548 0.0526915385377213  
0.9201184497686984 0.7280565944148106 0.5496225020173462  
0.9199761382653973 0.5713761482798462 0.5581178332530700  
0.9822134263099904 0.2290394980804108 0.0569850753599555  
0.4206053850071308 0.7295939222704751 0.1507424780015545  
0.4734527761740238 0.0630582384445749 0.6565815038500799  
0.3277001129179954 0.2326558567328075 0.6408821180464014  
0.5721694738660629 0.5668652259113149 0.1447886303958238  
0.8258869584368510 0.0695707617548994 0.0629681809505578  
0.0795858719343883 0.7273001177896541 0.5633019503762585  
0.0776904088050400 0.5691873501983696 0.5675432462661535  
0.8266722855925938 0.2311126707584598 0.0637552480371059  
0.5735321484666508 0.7296465016010860 0.1448713232391772  
0.3202333746607244 0.0740173334484072 0.6362339203330664  
0.2733906605376793 0.2756621413376507 0.4325020818773150  
0.6262304439625911 0.5290175432851436 0.9263106853895300  
0.7713424171418464 0.0246716148163205 0.2760864808357278  
0.1296166466597181 0.7757010448623091 0.7760798825423232  
0.1298313260692234 0.5245586362711743 0.7758333780497484  
0.7759538198959700 0.2735467614279400 0.2750472747176937  
0.6310156269198252 0.7729998103572577 0.9385942918578769  
0.2738491965738550 0.0289093251577577 0.4296535468262531  
0.4062107427753922 0.2326977977750666 0.3169646260884777  
0.4919456799570467 0.5719022140189274 0.8269289751518615  
0.9041483182497292 0.0687025279545049 0.3914292795426914  
0.0000434526511470 0.7270439438416288 0.8926446940117490  
0.9962459203282780 0.5717775090101977 0.8908409635693013  
0.9069134917907482 0.2236236159814665 0.3898139670702581  
0.4056322922857943 0.0788484701865678 0.3226178217113357

Structure TS reaction H2O2/36→37 S=8/2

1.0000000000000000  
20.1473052208878016 0.0000000000000000 0.0000000000000000  
0.0000000000000000 19.7681594983396991 0.0000000000000000  
0.0000000000000000 0.0000000000000000 13.2309279702280005  
A1 Fe H O Si  
2 2 8 200 94  
Selective dynamics  
Direct  
0.2775301018601724 0.5760010239932782 0.7872251417718630 F F F  
0.4964023870796410 0.7311362449441816 0.8226655528644855 F F F  
0.3324383952564100 0.6522183289889969 0.5694480919960043 T T T  
0.4611203692516000 0.6741427811279871 0.6176284300889158 T T T

0.2344495878308579 0.5952066251708350 0.2472942500328951 T T T  
0.5525694996766429 0.6878104966976559 0.4633604974022094 T T T  
0.4918671965104258 0.7368652119439183 0.4382305604078877 T T T  
0.2831319791139419 0.5512822439826793 0.5902578483097570 T T T  
0.5810034414972037 0.6122264417306117 0.6701359328135359 T T T  
0.5430346159088461 0.5639880981097234 0.5959787247427824 T T T  
0.3078786345922334 0.7431167162538043 0.4513292720375714 T T T  
0.2464423649932339 0.6796220460661597 0.4175598840734071 T T T  
0.7075693092687558 0.4662281385051372 0.3227504109070409 F F F  
0.1934372474083048 0.3216248223877116 0.8152322181646241 F F F  
0.2112518569552577 0.8332849032803011 0.3959449889207249 F F F  
0.6945907344946107 0.9702870706302775 0.8905382499808994 F F F  
0.6942515155408913 0.3285960628577840 0.8956823896021078 F F F  
0.2061735215610412 0.4768991200976060 0.3986086986722839 F F F  
0.1990005365157828 0.9747706825782672 0.8155648602518966 F F F  
0.7082346820732113 0.8213409772434872 0.3055301102190384 F F F  
0.5943661338365516 0.4712064381482293 0.4194593820179904 F F F  
0.3058064850917717 0.3307150396259573 0.9180646072089402 F F F  
0.0983642664667954 0.8318262971513875 0.2928573987170608 F F F  
0.8079423292061136 0.9659381992525127 0.7902924832638973 F F F  
0.8051531620499617 0.3352159439107893 0.7914946034293138 F F F  
0.0970910022664810 0.4646741409292332 0.2909593844371656 F F F  
0.3122697687658160 0.9848713656127472 0.9160675977866717 F F F  
0.5999185769174389 0.8377341910174039 0.4139634772994825 F F F  
0.6097266599354754 0.5375337586041837 0.2447967369976567 F F F  
0.2983161873386635 0.2525549082603789 0.7507604403625905 F F F  
0.1112732809926200 0.7573153428819879 0.4595151068471850 F F F  
0.7965663218099337 0.0403993472779334 0.9579423387139698 F F F  
0.8005548437193255 0.2592891414535714 0.9568757649070392 F F F  
0.0954598590292761 0.5398671146098764 0.4575437703259482 F F F  
0.2949060696310895 0.0549705891854586 0.7474668164171590 F F F  
0.5965304044047599 0.7570947370125936 0.2553472111851605 F F F  
0.6007922714865401 0.4024498001916328 0.2495977568934578 F F F  
0.2991817165178574 0.3851406779845590 0.7391042028698607 F F F  
0.1035767306434039 0.8918852583416239 0.4693851532751623 F F F  
0.7989600057441919 0.9054043821116480 0.9659040355228541 F F F  
0.7983831456328474 0.3936725839339275 0.9710615033231846 F F F  
0.1039889313774793 0.4053552256475115 0.4691158629160839 F F F  
0.3110152216162234 0.9230524564810381 0.7377697722940013 F F F  
0.6042931178168587 0.8911573080399862 0.2321922146989266 F F F  
0.5223859841611329 0.4710767331732413 0.5839990493290514 F F F  
0.3821721274324617 0.3588091591611757 0.0717993400249526 F F F  
0.0269095918626476 0.8542597257886513 0.1304426509839729 F F F  
0.8813053809144833 0.9401224581141321 0.6316188259943587 F F F  
0.8782218296046764 0.3563203778054174 0.6304034174497772 F F F  
0.0236838282470586 0.4395259522045762 0.1303436777620135 F F F  
0.3743520482131117 0.9484704594341409 0.0847288705497391 F F F  
0.5269674655192418 0.8612775012912550 0.5718894027684343 F F F  
0.5213555934870016 0.3612315943528870 0.4666330347566756 F F F  
0.3745460639375011 0.4487004749360963 0.9235479014836443 F F F  
0.0174734404366177 0.9394237082887642 0.2865944937715810 F F F  
0.8871777951956048 0.8565602590893064 0.7906124042206457 F F F  
0.8867219055487396 0.4413785510481532 0.7880252062609188 F F F  
0.0192584075918347 0.3548901735352388 0.2881762597400126 F F F  
0.3413050877665498 0.8570234221350361 0.9445839196945656 F F F  
0.5189206513048887 0.9467529617636288 0.4158654085453364 F F F  
0.4635022964827868 0.4756803333041901 0.4077133782022315 F F F  
0.4345146928390164 0.3323849593445161 0.8895697453931461 F F F  
0.9669100991825985 0.8175926445626160 0.3019196731020628 F F F  
0.9386736039741663 0.9777433959899682 0.8048175268660387 F F F  
0.9356036613187655 0.3185479920548815 0.8031708975485472 F F F  
0.9665539627420827 0.4760761234268216 0.3026540559803834 F F F  
0.4390741988794531 0.9457099148185932 0.9140290233692312 F F F  
0.4707114520379321 0.8222746632187139 0.3995304866537595 F F F  
0.4669238850571418 0.5161473375351875 0.7482156646679456 F F F  
0.4202740791189044 0.2797249469241549 0.2194304951574466 F F F  
0.9808158330913983 0.7749324503662223 0.9868810020577357 F F F  
0.9235718058632330 0.0203446368529256 0.4865348062958788 F F F  
0.9158637362652797 0.2736807720561458 0.4856816973838676 F F F  
0.9839595372959025 0.5232075896239294 0.9880608268089830 F F F  
0.4165825650506747 0.0290049631005118 0.2282411526102308 F F F  
0.4926142182175681 0.7623791058107727 0.6947447865830298 F F F  
0.3988850705962221 0.4311546058651530 0.6304761674484496 F F F  
0.5085025641179683 0.3561910002734905 0.1246398705383740 F F F  
0.9005393402655315 0.8627551349723248 0.0770687143217756 F F F  
0.0088279852465618 0.9418312503947206 0.5848139336749796 F F F  
0.0043497612770551 0.3549114138861853 0.5760161166205151 F F F  
0.8959945456682021 0.4449278552783724 0.081537708719609 F F F  
0.5027490683177334 0.94649489308686434 0.1361265185055274 F F F  
0.4031047348605554 0.8605753120728110 0.6343673658329365 F F F  
0.5030869947515271 0.3872597505478410 0.7364882848898588 F F F  
0.4196450381530141 0.4123677913301620 0.2461150707741595 F F F  
0.9955832311174859 0.9069021775703945 0.9535295514167572 F F F  
0.9208678065399880 0.8874576875521569 0.4583885774540377 F F F  
0.9123610748729973 0.4058238449040843 0.4530515194378069 F F F  
0.9837584641283001 0.3900676821111162 0.9563466520513586 F F F  
0.4107332329908218 0.8971581172132090 0.2593855165681873 F F F  
0.5018981184414812 0.8861626709783792 0.7629015253264484 F F F  
0.3052867907328576 0.5161313644648189 0.6998018237301409 F F F  
0.6029360263762271 0.2742929750415470 0.1960583124405417 F F F  
0.8152048407215702 0.7741530382180954 0.0006306027282292 F F F  
0.0995607940039989 0.0234234199025352 0.5039000034778169 F F F

0.0976088097835444 0.2732211116841157 0.5057281516968430 F F F  
0.8015732222939533 0.525389773635998 0.0070455890781957 F F F  
0.5949659547687318 0.0257131326797619 0.2162467431119168 F F F  
0.3018402770980657 0.7907907648469319 0.7127532205377065 F F F  
0.2749730040780278 0.4307628376063519 0.5574811137396836 F F F  
0.6320102556564962 0.3697314561709888 0.0612701922382755 F F F  
0.7766136415821379 0.8581064413591619 0.1457436711787254 F F F  
0.1348687669905786 0.9392454756570032 0.6483937962221376 F F F  
0.1273979822463005 0.3589133413416121 0.6511725828732580 F F F  
0.7728418541487514 0.4397541485564531 0.1532276235378944 F F F  
0.6259044937486706 0.9501485235240992 0.0591013580818895 F F F  
0.2801774637817047 0.8723323645719674 0.5596862237199716 F F F  
0.3348092288486484 0.4538339756078713 0.3849761733902213 F F F  
0.5645830660527409 0.3366690342842205 0.8974179460538565 F F F  
0.8379058890870539 0.8412523408454007 0.3193595528836184 F F F  
0.0692204131255139 0.9659175763151993 0.8144438734140635 F F F  
0.0648142248480639 0.3354507463402001 0.8214630460290948 F F F  
0.8366254843527514 0.4709327319502279 0.3213405285232582 F F F  
0.5661752397307112 0.9683837015929342 0.8847426543338486 F F F  
0.3394970312857666 0.8300840703215897 0.3955725399783461 F F F  
0.2511378292734037 0.3519501020474749 0.3999389108007847 F F F  
0.6363144003225401 0.4494965853965738 0.8986324454293921 F F F  
0.7560299256556533 0.9450345763186263 0.2979374987225469 F F F  
0.1436228259878334 0.8542223729204608 0.8039081075084198 F F F  
0.1414398815770994 0.4447668308680193 0.8056662084238084 F F F  
0.7753104146889882 0.3523956321861306 0.3070950389855369 F F F  
0.6324274302779003 0.8536294667489557 0.9173831198736195 F F F  
0.2770021973088745 0.9495812221514157 0.3940388189167905 F F F  
0.3941531162091110 0.5438747283164673 0.2745074583857487 F F F  
0.5068143513623369 0.2553010822719770 0.7691625983790473 F F F  
0.8952360489550557 0.7553396218855677 0.4402013945789207 F F F  
0.0060694659734750 0.0423846853435137 0.9426690385441390 F F F  
0.0018317061041415 0.2561884055980457 0.9463953741620088 F F F  
0.9065348166783807 0.5414358470831004 0.4479724585072304 F F F  
0.4794914058807294 0.0206751051104774 0.7621983594212054 F F F  
0.4023221266424244 0.7607056598133610 0.2596722565726282 F F F  
0.7070407457074168 0.2377353175068606 0.3107116150894385 F F F  
0.1929766743749255 0.5691695004739401 0.8058008931029335 F F F  
0.2045676861232053 0.0624038733625625 0.3914180052971190 F F F  
0.7023971413468857 0.7411300447155327 0.9046196131896096 F F F  
0.6942917636826209 0.5698801235956452 0.9051700094725561 F F F  
0.2088244783636597 0.2270023678771693 0.4163277935565617 F F F  
0.1954591055283217 0.7312709673858251 0.7914527569144383 F F F  
0.7068503235570702 0.0684846909509673 0.3065017238603502 F F F  
0.5915559001521089 0.2586014289415317 0.3961849464146638 F F F  
0.3199962758383066 0.5703041993784339 0.9004132467262096 F F F  
0.0898894183948755 0.0504340646116290 0.3062202671504792 F F F  
0.8138566095517632 0.7456315213427089 0.8029308668750232 F F F  
0.8047167483297031 0.5465092464234758 0.8075633770046267 F F F  
0.0994162587123952 0.2485512040459881 0.3081195470162896 F F F  
0.3067226378705570 0.7330713788902301 0.8942242372754166 F F F  
0.5964075613862221 0.0554837781554482 0.4120487306969238 F F F  
0.6075094784817878 0.1526911526143309 0.2734975599196829 F F F  
0.2961195504267238 0.6567023883800545 0.7261455531855958 F F F  
0.1065527745047277 0.1477961376429278 0.4423221904543695 F F F  
0.7966331358267382 0.6495264976496387 0.9401908348275043 F F F  
0.5313102248398991 0.2474367915253026 0.5721383837017768 F F F  
0.3700056527602840 0.5332103713577609 0.0804329262139518 F F F  
0.0262678625864083 0.0285189999403883 0.1367359544887066 F F F  
0.8820610124036889 0.7720333822420358 0.6362338408047776 F F F  
0.8755470336408777 0.5303736906776066 0.6407249702191820 F F F  
0.0291964561154430 0.2647220184424128 0.1409955696830210 F F F  
0.3696812958119935 0.7572063668852778 0.0667251326603449 F F F  
0.5236993904756773 0.0297039896416749 0.5745384449138271 F F F  
0.4591914385549458 0.2504256728715859 0.4062416331339804 F F F  
0.4504153229480679 0.5601162440579444 0.9335356037947165 F F F  
0.9579016108500227 0.0586598819194393 0.3006016067759916 F F F  
0.9461250785271673 0.7363572671583043 0.8015401093331462 F F F  
0.9346984316640601 0.5652016705343499 0.8124305490765593 F F F  
0.9678656233711962 0.2326729740191169 0.3112550602200097 F F F  
0.4348066996761872 0.7681287754900481 0.8922608020868381 F F F  
0.4646794772411340 0.0681913373874465 0.4059769266774040 F F F  
0.4912489171754757 0.1403292033326267 0.6771016642450149 F F F  
0.4157185338856024 0.6486668999580658 0.1581472556845114 F F F  
0.9933666805272949 0.1483372554285438 0.0615558791869191 F F F  
0.8969965846604637 0.6498066132198161 0.5609144804504780 F F F  
0.4075237137254817 0.2425170754305270 0.6380227994594989 F F F  
0.4952761096820097 0.5423058806692467 0.1477510399766047 F F F  
0.9043535617298915 0.0493015356769391 0.0711683562366758 F F F  
0.9989951641316068 0.7359053900924266 0.5590829718402404 F F F  
0.9982954837647426 0.5645909131038209 0.5884455209754975 F F F  
0.9045453167331914 0.2480109121071763 0.0818404294735942 F F F  
0.4974301803311434 0.7515289418063631 0.1214589032684046 F F F  
0.3974197316099861 0.0542331473874853 0.6165668605588976 F F F  
0.3087876622514472 0.1539886781895561 0.6165706130156110 F F F  
0.5794148715510019 0.6474914860026288 0.1453435226971891 F F F  
0.8149490633444429 0.1495375658541107 0.0679705171483391 F F F  
0.1001247862376644 0.649233128771904 0.5748737906416537 F F F  
0.2950726153416099 0.2777305154534488 0.5512736023643399 F F F  
0.6058848565210369 0.5348819192339533 0.0440610075150545 F F F  
0.7885441736049543 0.0331540886107007 0.1579946805408383 F F F  
0.1057032457879714 0.7723283406850925 0.6578055622516885 F F F

0.1158996214418337 0.5262366228175921 0.6537658410225475 F F F  
0.7840383286591575 0.2666330550296934 0.1541158159813492 F F F  
0.6227651477092095 0.7616516586023465 0.0604281339462460 F F F  
0.2772265490582058 0.0323907550926279 0.5508839008727620 F F F  
0.3318174253361192 0.2482496540795864 0.3620253378107705 F F F  
0.5705573991620199 0.5624467921183296 0.8512517315494748 F F F  
0.8316932701173627 0.0501244161898171 0.3487867975248449 F F F  
0.0728734736249095 0.7456991928398864 0.8499051664770150 F F F  
0.0643411676607215 0.5515370174537679 0.8340858025412459 F F F  
0.8369000751740430 0.2355708142534212 0.3327267205074875 F F F  
0.5736873459716563 0.7353055235745245 0.8762605474151783 F F F  
0.3346075140766374 0.0689494283486454 0.3763631612005653 F F F  
0.4112562312985943 0.1562994815307448 0.2817809921921111 F F F  
0.4786177590665517 0.6469743263026402 0.7813738466599460 F F F  
0.9070021338971515 0.1458835638417142 0.4318412304673345 F F F  
0.9994310260945483 0.6490738920146057 0.9311100211702694 F F F  
0.4096423843133243 0.6031890351682084 0.5934990392146692 T T T  
0.3926055626508738 0.7232210309587821 0.5768854409952724 T T T  
0.5050178700302892 0.6943594152562287 0.4720311744213014 T T T  
0.2802849819318503 0.5847457126038531 0.5334521526807565 T T T  
0.5532949674582223 0.6122761092719454 0.6095167001996311 T T T  
0.2808767265867367 0.7072548184681454 0.4821506648125748 T T T  
0.2598879322020042 0.6283342510942237 0.2871972721043565 T T T  
0.2124403566804855 0.6515447452754334 0.3554261153835940 T T T  
0.6281291135913492 0.4694124078385116 0.3073570033323776 F F F  
0.2735507572181959 0.3220792934631405 0.8058055814425416 F F F  
0.13106715711446136 0.8280988425824845 0.4052966615848206 F F F  
0.7744307422711358 0.9707045392075742 0.9020840862828834 F F F  
0.7745235599347851 0.3290412771815241 0.9048866254290999 F F F  
0.1258229839200808 0.4720314099939742 0.4058521770795593 F F F  
0.2785027679142686 0.9837779308354371 0.8042738246223848 F F F  
0.6281958503350467 0.8271410037420566 0.2991875990703363 F F F  
0.5254525565522457 0.4428145230416973 0.4672028990680417 F F F  
0.3744305813309907 0.3686430524919899 0.9509642391055095 F F F  
0.0274444693260563 0.8608727758527195 0.2523744223103392 F F F  
0.8788214031388932 0.9348014925798083 0.7536841474001861 F F F  
0.8767273685189423 0.3631149401372795 0.7522825831209801 F F F  
0.0267213589721393 0.4333928899278732 0.2521729304182188 F F F  
0.3669752056917019 0.9334898331926169 0.9645753222287183 F F F  
0.5293928112319648 0.8689664761211020 0.4510170104650228 F F F  
0.4710240434989927 0.4506468301627464 0.6763617809965368 F F F  
0.4325208504051972 0.3521789254244894 0.1660148064716651 F F F  
0.9758273944798788 0.8498173522793024 0.0358002143366107 F F F  
0.9337672159117147 0.9472105088304019 0.5393305192067572 F F F  
0.9283930826543312 0.3476104383828940 0.5353386698522087 F F F  
0.9716425362758017 0.4495668576106766 0.0378565014959094 F F F  
0.4268545582776113 0.9556484169510000 0.1765306738815937 F F F  
0.4789388348655308 0.8420580454541167 0.6660190454635426 F F F  
0.3199756673185448 0.4417256553023350 0.6578312443464185 F F F  
0.5858968228876833 0.3504514143665816 0.1574233748659566 F F F  
0.8232536021866963 0.8497531422755529 0.0470162161204826 F F F  
0.0863715644166092 0.9492365485582255 0.5520989452968976 F F F  
0.0831940351918377 0.3483157465367626 0.5506699954184029 F F F  
0.8177337306602865 0.4510183197338264 0.0529303371268881 F F F  
0.5816885177010604 0.9537132983025742 0.1608907797396526 F F F  
0.3241673271727734 0.8608063649440467 0.6611828504178234 F F F  
0.2669263255343282 0.4290937825439087 0.4361850482870082 F F F  
0.6316383267386314 0.3715975415846202 0.9381657609508878 F F F  
0.7706310738323410 0.8668727232278428 0.2669865685631763 F F F  
0.1363703814054773 0.9329401372764750 0.7708275121498502 F F F  
0.1315914452043430 0.3664631360989716 0.7733169688190173 F F F  
0.7735884620625555 0.4316987191167456 0.2753615775962359 F F F  
0.6296898743021799 0.9340645940184302 0.9386198389722722 F F F  
0.2759878635793669 0.8729644964202095 0.4374928096022259 F F F  
0.4027736899555237 0.4706165487865732 0.3281847783833527 F F F  
0.5016492005551996 0.3287722171282752 0.8231404574381074 F F F  
0.9054124875100484 0.8263647194309058 0.3803008045585656 F F F  
0.0021824042494885 0.9720597648525953 0.8797243302635280 F F F  
0.9967054961191693 0.3261070387301856 0.8825395108272502 F F F  
0.9058095405451496 0.4724221771576964 0.3825083669074161 F F F  
0.4960703383088116 0.9548501358931034 0.8300143993579141 F F F  
0.4055206858083906 0.8292228669017447 0.3255133583513867 F F F  
0.6274590121138530 0.2311570360767874 0.2941151418728865 F F F  
0.1255107432771325 0.0707343614346598 0.4118437318667958 F F F  
0.7811927741879074 0.7281082853125511 0.9126457082138586 F F F  
0.7745524908724803 0.5724485923708258 0.9151290562935444 F F F  
0.1283343180642262 0.2251541560494559 0.4179775106393819 F F F  
0.2754953113436471 0.7283919533557395 0.7810000021913410 F F F  
0.6269113897738237 0.0751958998868787 0.3013811588313544 F F F  
0.5258269144261760 0.2793591637615975 0.4594413891612064 F F F  
0.3758944425707824 0.5283859956896464 0.9571663851057366 F F F  
0.0228468866135287 0.0190639800111114 0.2582293550225216 F F F  
0.8822129003938244 0.7773721481622431 0.7584887295976230 F F F  
0.8755713897625697 0.5209077864334830 0.7625256963419815 F F F  
0.0291017795907393 0.2751960679635772 0.2625878633246614 F F F  
0.3649610979514577 0.7780169862505275 0.9474856226743924 F F F  
0.5261556207594822 0.0255056536343119 0.4521694555929088 F F F  
0.4836453551630697 0.2212058542862039 0.6635017214537839 F F F  
0.4189570034658203 0.5675759427274785 0.1634091816932610 F F F  
0.9819822713855473 0.0679773828420949 0.0527982938180429 F F F  
0.9192994068353073 0.7278085236534011 0.5495132268399132 F F F  
0.9204563197744875 0.5716208836489542 0.5593346839881121 F F F

0.9816945110390023 0.2289033116169321 0.0574388145225626 F F F  
0.4214799797786739 0.7293694658952674 0.1495941302800006 F F F  
0.4730099845512328 0.0618665100915692 0.6577703144707883 F F F  
0.3275982121689793 0.2319252277868316 0.6404718315957609 F F F  
0.5722106234935751 0.5661519936879955 0.1448469033066928 F F F  
0.8263142103029182 0.0686763355841720 0.0636470740458392 F F F  
0.0788958916628815 0.7278619977528464 0.5630981598894778 F F F  
0.0778349783036418 0.5702554920267673 0.5686813639793797 F F F  
0.8264486107056257 0.2304194425645250 0.0647960489709902 F F F  
0.5739505216805441 0.7289846923569030 0.1441753869657987 F F F  
0.3199449425330556 0.0740246075577460 0.6343923969285612 F F F  
0.2723926693959626 0.2759056453526298 0.4329554081165270 F F F  
0.6261503588819650 0.5290612161753927 0.9258954256359289 F F F  
0.7718474562436128 0.0244111152620192 0.2772940750758792 F F F  
0.1291132466498368 0.7755909983747884 0.7753921812534372 F F F  
0.1303877231410979 0.5244157251199866 0.7760899730256057 F F F  
0.7760834644641008 0.2730498728617263 0.2761881105353083 F F F  
0.6311909548826620 0.7724630321302186 0.9380365857654951 F F F  
0.2735203753971618 0.0287751755596020 0.4280674647218490 F F F  
0.4054042647523630 0.2343232959384665 0.3181635681800685 F F F  
0.4911384110130612 0.5718731883189605 0.8295352290244580 F F F  
0.9047582546770840 0.0683697685180817 0.3919203443481436 F F F  
0.9999776222264458 0.7267396331097018 0.8922614636869426 F F F  
0.9966468492536151 0.5714884431553173 0.8908655395663274 F F F  
0.9068948596393795 0.2231339883392636 0.3904225922537492 F F F  
0.4062775168200901 0.0795509657899061 0.3229733665096930 F F F

Structure 37v S=10/2

1.0000000000000000  
20.1473052208878016 0.0000000000000000 0.0000000000000000  
0.0000000000000000 19.7681594983396991 0.0000000000000000  
0.0000000000000000 0.0000000000000000 13.2309279702280005

Al Fe H O Si

2 2 8 200 94

Direct

0.2748177457981402 0.5758745704572962 0.7836548793802319  
0.4977712352288370 0.7305055007301751 0.8231965730347288  
0.3340063408807699 0.6533026694286443 0.5712861650590922  
0.46515515766564874 0.6690648030226102 0.6209872580779963  
0.2498832436605058 0.5883750652309142 0.4125333513525243  
0.5506192019121745 0.6853452657308298 0.4642344552862755  
0.4902716693584213 0.7366237329632360 0.4448183121208159  
0.2730894656938055 0.5528349600247123 0.5677624193979057  
0.5877992345185508 0.6066226284028562 0.6620480940251985  
0.5468421896470895 0.5574378277424032 0.5929290204419666  
0.3127621887785748 0.7493111587399095 0.4532953977608398  
0.2551448965717770 0.6941687736556149 0.4224039741548109  
0.7097784149190303 0.4705959120979802 0.3225286877339558  
0.1935363995454112 0.3225044652888766 0.8157051701715383  
0.2118063124575555 0.8350245304509949 0.3952917967998021  
0.6950544031759603 0.9680689023966744 0.8912524085688028  
0.6940247214435873 0.3285610256920773 0.8949458088635567  
0.2080364690169592 0.4724401661059734 0.3994885102906596  
0.1985765694473953 0.9753565125366424 0.8155198483644340  
0.7082289763658419 0.8215634840458090 0.3054389429500147  
0.5970317505180588 0.4674811216570532 0.4215640001582255  
0.3059593710054368 0.3305946442325389 0.91910754422923667  
0.0989545560901614 0.8320471200372205 0.2931653804128672  
0.8077926192144086 0.9660739716679475 0.7901216689447504  
0.8048502032942418 0.3369908369487495 0.7901085819287947  
0.0989931059493157 0.4632188082509160 0.2902768113667064  
0.3114872612700100 0.9840179263912581 0.9168691498752919  
0.6002614205149200 0.8374072595044367 0.4152819328006328  
0.6068928602013878 0.5360427621759630 0.2475079360967109  
0.2987687101812752 0.2558036696913097 0.7485374533239930  
0.1136386865774833 0.7557067420480531 0.4578266280937572  
0.7956253390537151 0.0415882196875722 0.9566707300662526  
0.8017593787118180 0.2613929307174114 0.9557372430772603  
0.0996644240738806 0.5390321635481518 0.4569173376690931  
0.2946175341005048 0.0556318542013731 0.7485934583110598  
0.5965823379513757 0.7566568375035356 0.2570015695313446  
0.6068658286193668 0.4006375661906628 0.2504368355853724  
0.2989725024049042 0.3893495152057548 0.7443117160761171  
0.1029523096117263 0.8895610790507164 0.4721917165152913  
0.8014980557813668 0.9069788280301836 0.9671961500168278  
0.7972140865321194 0.3959445653092650 0.9686933997960462  
0.1041843528826427 0.4041398733160579 0.4685058755081837  
0.3108368736460808 0.9242818212947773 0.7371200188990340  
0.6036523550114230 0.8907524495186954 0.2333027009663138  
0.5204910107652625 0.4680214921933893 0.5808184440282917  
0.3829894122153974 0.3573789648140149 0.0723410893343694  
0.0282284988619591 0.8558300732773613 0.1303474448306102  
0.8806753604541208 0.9400610523731504 0.6308306229826525  
0.8786552758327264 0.3575470509174819 0.6301529607782820  
0.0229526011963456 0.4411102153731494 0.1314502434513635  
0.3740929092388914 0.9454577004847229 0.0845096178780229  
0.5269096109043595 0.8614018601874804 0.5732991130983915  
0.5172570697211307 0.3601914213582273 0.4589321576514362  
0.3784442751443179 0.4468454607276399 0.9225343008069183  
0.0195197382757615 0.9403670849709671 0.2877795205608598  
0.8870130196355797 0.8567266469424865 0.7899364099949069  
0.8867926322937283 0.4431800277504278 0.7870207819989475

0.0180963119017117 0.3559089736593018 0.2884557536994082  
0.3438276568880878 0.8563383394315391 0.9396192985210136  
0.5185009359726153 0.9456214742657171 0.4158283336877991  
0.4678231247703105 0.4782723523524818 0.3989240489608910  
0.4346304776542665 0.3286653099577822 0.8907865034937140  
0.9673358917650846 0.8190542801372578 0.3009526000402485  
0.9385378241335869 0.9778885368186236 0.8033757185122246  
0.9352428375086211 0.3203111459029281 0.8038345860434253  
0.9694226266796526 0.4786473783772395 0.3067148711767516  
0.4391110602175836 0.9486956584726645 0.9143828581053607  
0.4710882466402077 0.8205958609742343 0.4017111169679691  
0.4689693978563194 0.5158242420929446 0.7454349228918110  
0.4224255493211130 0.2788038182780795 0.2201896567130321  
0.9822708723907358 0.7758617765996555 0.9870531334763034  
0.9220995742291999 0.0217858542074144 0.4871405117401221  
0.9150599445154655 0.2743286436330450 0.4853512666854382  
0.9824805289185911 0.5240998473469598 0.9885661891503884  
0.4154871922885351 0.0255617109566731 0.2289314713509976  
0.4924726749916281 0.7635958046986736 0.6975093087486193  
0.3957971153366095 0.4340939863082180 0.6292628215961414  
0.5082592322846927 0.3610631590450728 0.1314239687792065  
0.9016305243428556 0.8627259778503280 0.0792171785651401  
0.0081023396383356 0.9429458684375653 0.5834787135806014  
0.0046178054699008 0.3540490434859897 0.5754149691722537  
0.8955634738138508 0.4439887573146332 0.0814217648220239  
0.5029096579446382 0.9460738162077550 0.1346923038642909  
0.4028208563132314 0.860526998650986 0.6354176843324943  
0.4984998908033654 0.3853605430420355 0.7341238075888609  
0.4126180152806515 0.4105073416761669 0.2493401540418184  
0.9948811231317712 0.9079287983256984 0.9535841140665954  
0.9199899448134539 0.8892669374608810 0.4562747548050154  
0.9128684271280831 0.4065781002152367 0.4530423917800460  
0.9847795797066089 0.3910346863132086 0.9569093655417478  
0.4125291190609180 0.8937235675711670 0.2578591009458696  
0.5011935032294540 0.8882849367507923 0.7634880914845540  
0.2980666712633053 0.5184644443238391 0.6899151558344709  
0.6001138624018917 0.2731756604168781 0.1955976994884435  
0.8172927588162249 0.7750896354423736 0.9990113864015429  
0.0988917475251661 0.0222963315885302 0.4983501747067847  
0.0988970585913247 0.2724604576935959 0.5068366810784938  
0.8029650216071986 0.5269541280881535 0.0084195763952923  
0.5941200819617050 0.0252587814581532 0.2166826299037717  
0.3009859702936758 0.7919377712395337 0.7162781942766652  
0.2718988645151728 0.4241351016959101 0.5587869795012929  
0.6307501494638240 0.3679211907813850 0.0604669262488467  
0.7768118035663455 0.8573180886085598 0.1450686148134715  
0.1339529035234684 0.9420732883048198 0.6479020043733471  
0.1272460746743306 0.3592189207192422 0.6515922039193345  
0.7718094531089381 0.4397595124299519 0.1517258874646581  
0.6266782472061041 0.9496837069419127 0.0603467728159702  
0.2800186829086954 0.8717990555811823 0.5606726040324984  
0.3381383906083948 0.4581228161688475 0.3979714263017863  
0.5642500055990352 0.3391245301733953 0.8942927843217308  
0.8378521287467613 0.8399707037206465 0.3187327912711037  
0.0689726711734081 0.9672618564245069 0.8152287000731607  
0.0647367068359608 0.3353796087759447 0.8215224206959962  
0.8393837528649439 0.4693340523188315 0.3159723288159804  
0.5666413299760915 0.9691326785072778 0.8862897785819627  
0.3403167853730442 0.8303115960454432 0.3971292842282028  
0.2592485358764472 0.3501904574322397 0.3919219480007048  
0.6380666970805512 0.4501519665374974 0.9008723493010566  
0.7570554823488015 0.9448561997592519 0.2966864678758528  
0.1424713985973828 0.8553254338282650 0.8016955882049883  
0.1408626935553055 0.4452119464282611 0.8060901009660785  
0.7723931975280444 0.3536232302307956 0.3073632819902279  
0.6299164743271778 0.8528953337686774 0.9190237912339959  
0.2795151051223219 0.95020451176501211 0.3956914873876269  
0.3904475658841087 0.5434868855015010 0.2720889603249888  
0.5082921396347854 0.2541908936987177 0.7690022187607015  
0.8974336170947599 0.7564445271126353 0.4404038724827742  
0.0041765187679055 0.0434407860750911 0.9418304504538362  
0.0010699922102195 0.2568868515089316 0.9464012220435235  
0.9025196323042789 0.5418609898049227 0.4479758300696899  
0.4814405885646366 0.0233508829424129 0.7634850461004352  
0.4018130863766527 0.7577880036461180 0.2634275136356636  
0.7067152824419459 0.2374093363539352 0.3064299085615597  
0.1906655397024330 0.5705965180145857 0.8083550638930164  
0.2051267419880764 0.0614659516860167 0.3893834635508230  
0.7029768109828658 0.7423362700368417 0.9078813796663457  
0.6940491542131249 0.5713681500356964 0.9107629968296296  
0.2092402990534570 0.2279993596861547 0.4129938542315579  
0.1960838051029577 0.7330248341741996 0.7999510937734033  
0.7064405270440218 0.0677093971722675 0.3063917013447480  
0.5928914721532738 0.2588841489854053 0.3962802635459077  
0.3202351913681932 0.5663006878610758 0.8934485979614981  
0.0906237665096915 0.0527272684237807 0.3018115645571275  
0.8122491498377628 0.7466358115082560 0.8015262505787860  
0.8027200949841270 0.5465450249765509 0.8084267423292771  
0.0986111459850841 0.2495751148911428 0.308555355982385  
0.3096452009428995 0.7310947093014153 0.8952987563650245  
0.5963928838605271 0.0543572075475605 0.4124768007985961  
0.6069223526411783 0.1520526403499495 0.2744409189676619

0.2935331624453137 0.6574426017230370 0.7253772756855758  
0.1080252386477905 0.1477174940295763 0.4411868036840172  
0.7974857004859035 0.6504910458446017 0.9397535722525971  
0.5323013801888293 0.2498846604148937 0.5720515740381243  
0.3693595798416152 0.5325006273613095 0.0764214481774589  
0.0239746755504356 0.0274978896990908 0.1355762839200476  
0.8819375452303398 0.7716539904892937 0.6361413533195966  
0.8740963451584348 0.5336435819664737 0.6415993819414945  
0.0286680411909813 0.2663352612394280 0.1409675107958379  
0.3693962456351370 0.7602707114336412 0.0698229797537721  
0.5233341681745176 0.0285240221641016 0.5743908669662943  
0.4609981813259628 0.2448328643888164 0.4055145745341157  
0.4501075388152871 0.5608947451575198 0.9303782859112022  
0.9585928245753379 0.0590952677941695 0.3016969611528204  
0.9441090787966966 0.7358839806439417 0.8036086712526869  
0.9323167380086008 0.5677127861258995 0.8144636256960166  
0.9671893957195706 0.2335528203069863 0.3107736817155078  
0.4375088342623595 0.7648840151189805 0.8979131000206320  
0.4647404513272251 0.0669885126909552 0.4052455298292078  
0.4912121871139484 0.1409893821986688 0.6720186795307238  
0.4128504796553075 0.6482641163845489 0.1553321181186292  
0.9963872126338649 0.1489715375708658 0.0622083455218977  
0.9042371789456085 0.6507482265531417 0.5604640972929256  
0.4085401876873287 0.2447438220136327 0.6379324132461406  
0.4931183868202008 0.5423291281035293 0.1487897906541604  
0.9029727958308529 0.0540216802696530 0.0707256937666337  
0.0011915239369428 0.742915545425216 0.5616260384102797  
0.9984789938335100 0.5570201169877120 0.5842770069816624  
0.9044234981015612 0.2456288714305475 0.0820793884261364  
0.4966673134994601 0.7506497672905612 0.1248317574847259  
0.3973499409254057 0.0529178022039921 0.6181019728101311  
0.3108956523051141 0.1546852636358037 0.6191258535385283  
0.5784699778614276 0.6465851238990721 0.1485625922875984  
0.8105219694901077 0.1512104629069818 0.0673238671605936  
0.0955573601174196 0.6482044467552027 0.5725977144600102  
0.2962735203901851 0.2765867872410481 0.5479913179684839  
0.6042039237671816 0.5341057499181954 0.0464274076942686  
0.7874754092252763 0.0337167886665151 0.1564835607790828  
0.1120504758990972 0.7700555764505452 0.6559480550805410  
0.1169723433238693 0.5267114063751483 0.6537459285228071  
0.7847204570929416 0.2698720837982367 0.1527029314785288  
0.6215869549392214 0.7604203178115829 0.0618131790022341  
0.2769664973136625 0.0344435348098524 0.5510108384081095  
0.3336536919117137 0.2419201132235197 0.3607429733057831  
0.5712929269982033 0.5619458814789113 0.8524798234615003  
0.8318262183263582 0.0506603601011964 0.3464924436074490  
0.0712494914754007 0.7467869840543402 0.8455085450290385  
0.0615262131367334 0.5503998110906013 0.8318218873260590  
0.8362056603709785 0.2375836181203625 0.3318266456357767  
0.5752243477177715 0.7329397860566725 0.8762030868778268  
0.3350743573510654 0.0702337107736898 0.3761727656290969  
0.4137401324711391 0.1535719404863361 0.2761744088215337  
0.4808192440915828 0.6463015278460336 0.7776278470887952  
0.9057558295392558 0.1468937985098240 0.4304227028941707  
0.0004936868654647 0.6497470544888175 0.9313654568699887  
0.4028421738434753 0.5984181470054643 0.5912516880584101  
0.3891071582297654 0.7227249873240131 0.5833723864807826  
0.5039661547523494 0.6940413832115069 0.4783912810738843  
0.2742728724003766 0.5910917335921072 0.5194604739743842  
0.5576453435766624 0.6058661067919178 0.6042990437412673  
0.2835711268400031 0.7141304232486295 0.4817427284720204  
0.2322897916114827 0.5974585070622892 0.3378228688303304  
0.2240408620686815 0.6642942582856267 0.3307278406957102  
0.6300281196064476 0.4689381859070183 0.3087717029330360  
0.2736487198447390 0.3240704329268867 0.8065283110380678  
0.1317657728517233 0.8277129985767694 0.4053618191048780  
0.7748350610604372 0.9708899839171701 0.9022849978409531  
0.7743576358727550 0.3304933082650623 0.9035287588552641  
0.1276213269939047 0.4700938390112096 0.4049458519719725  
0.2780767831871995 0.9842045430091594 0.8047556256255801  
0.6281598452830990 0.8269140903165495 0.3001992986184015  
0.5255175801080597 0.4414656895953156 0.4633901870123144  
0.3754498010211730 0.3670823148289000 0.9515064957281800  
0.0284720973818429 0.8618866223698155 0.2523790888395849  
0.8785257900435425 0.9349027063457102 0.7529296889029466  
0.8767313661835402 0.3647937231866566 0.7519029298825955  
0.0273912104906437 0.4343890394600009 0.2530037450858569  
0.3672745690248317 0.9330648325779008 0.9635736076525130  
0.5295655072732907 0.8682079425175019 0.4524031477519602  
0.4688859676041597 0.4498752137708886 0.6739826848307927  
0.4316838409410300 0.3523691082296779 0.1686431030149784  
0.9767076078422863 0.8505963314120194 0.0363158209438432  
0.9329217667558345 0.9482652711797823 0.5384584961465383  
0.9285458482190575 0.3480714829754762 0.534998087746445  
0.9713213553216451 0.4502672430528777 0.0383955513059864  
0.4270010482138135 0.9530292045690991 0.1756852223036802  
0.4787573196360974 0.8427640275910731 0.6677478565238557  
0.3166886787212506 0.4431275427552728 0.6569394312038546  
0.5860886937235822 0.3504418880396122 0.1587774587801821  
0.8246051638221116 0.8501889370037691 0.0473189790660198  
0.0857033016195407 0.9494520980632092 0.5507739774878007  
0.0835343805603851 0.3476337989917999 0.5509254352527417



0.8175072689311589 0.4517112327077750 0.0524162279993700  
0.5815820164861498 0.9531400311488187 0.1612752748627373  
0.3239571579521944 0.8609825407391560 0.6625633152778367  
0.2694970415515444 0.4258879600960380 0.4369447574543120  
0.6315876018080221 0.3717964637459684 0.9376606257787989  
0.7708984910338386 0.8664697320491490 0.2663248100914455  
0.1356738529324028 0.9342831309683926 0.7701585557008294  
0.1314008150722354 0.3668884377051608 0.7737191224560194  
0.7738029295999942 0.4326885490947794 0.2739873676417582  
0.6295481503224446 0.9334343985271698 0.9398190900763077  
0.2766764443260100 0.8735998212751127 0.4385436383123074  
0.4020929503435288 0.4717262878876080 0.3289155209954531  
0.5008553298572747 0.3278126638728532 0.8221200565339506  
0.9058578795649269 0.8271268865321659 0.3794618585422019  
0.0014746767806658 0.9728770599885589 0.8794251146001683  
0.9966172644790200 0.3269812354962003 0.8828790045803558  
0.9063966026149717 0.4730094740007905 0.38215699094036279  
0.4965408971857811 0.9568847635396110 0.8308100817052511  
0.4062900955109331 0.8273729296637893 0.3268142198717450  
0.6269456451824688 0.2307039259208998 0.2930489223688472  
0.1260747324341000 0.0708007429736436 0.4086091831814286  
0.7816799240207368 0.7290104574662403 0.9126247464737796  
0.7745083534959152 0.5734277956013326 0.9168362513241256  
0.1288190164035160 0.2254244526160065 0.4171999956753025  
0.2756479550668341 0.7287108037844348 0.7837808066053693  
0.6265185009239486 0.0745295806143601 0.3017491044201659  
0.5259594503057666 0.2784012974449994 0.4575050680132308  
0.3762913947717872 0.5270085226546075 0.9535243467385423  
0.0231116331111948 0.0197905179502154 0.2573924395586346  
0.8813649583350027 0.7775126354663501 0.7583264933696633  
0.8742098173945198 0.5227466058269606 0.7631085130572920  
0.0284244967861474 0.2763296007267914 0.2626648174166881  
0.3666996482420815 0.7772970232221357 0.9489390510392163  
0.5260098886355302 0.0243726441638871 0.4520649295374194  
0.4844711729053395 0.2220914694993553 0.6622074825156993  
0.4163066393297016 0.5671575322736173 0.1613256736929055  
0.9812353479960574 0.0692775183290328 0.0523188977949947  
0.9221292645160288 0.7297862282283913 0.5499431185862339  
0.9209171144481633 0.5709946996548200 0.5585803928012500  
0.9820543073231428 0.2291352525755704 0.0575886157710989  
0.4203819132630874 0.7289404683981604 0.1512736565434871  
0.4732709784045620 0.0620773201817727 0.6572212823419920  
0.3287196667333958 0.2331800693724512 0.6397757870826042  
0.5702908209651830 0.5653139390264696 0.1472028357078476  
0.8244336994685768 0.0706809352196369 0.0625795039120056  
0.0803824132378537 0.7282470993336689 0.5622288259808956  
0.0777675102118583 0.5681297189112227 0.5671536849994251  
0.8258570635948727 0.2315290880503858 0.0639751003972716  
0.5732540054408360 0.7281026325802806 0.1464472299479479  
0.3202810336931782 0.0744650768829263 0.6357006091952426  
0.2750610183191901 0.2735886851794707 0.4292447425760683  
0.6263066493860425 0.5293188547020693 0.9288977931808534  
0.7717309897307366 0.0244478027527505 0.2759983116584153  
0.1300366707807354 0.7760349938546519 0.7754452709551916  
0.1291924918314994 0.5247794422319375 0.7767273051798478  
0.7753474852033485 0.2746032829805483 0.2747112667347036  
0.6308340370071582 0.7717198083100663 0.9397306621521988  
0.2743636221755922 0.0296096193082531 0.4282088168326506  
0.4075058684064168 0.2308263866941225 0.3161025381656927  
0.4924244242864361 0.5710964380710960 0.8277581730036155  
0.9043589552744485 0.0692021693804764 0.3913465755654427  
0.9996985296518194 0.7273142022830443 0.8920460365623999  
0.9953772616542270 0.5722497235105788 0.8912814291525430  
0.9060125518348953 0.2242463557979442 0.3895759951607593  
0.4067462976370070 0.0779554754554149 0.3215044077930127

Structure O2/1 S=12/2

1.0000000000000000  
20.1473052208877697 0.0000000000000000 0.0000000000000000  
0.0000000000000000 19.7681594983396742 0.0000000000000000  
0.0000000000000000 0.0000000000000000 13.2309279702282054  
Al Fe H O Si  
2 2 8 200 94  
Direct  
0.2733639471371227 0.5756547703374078 0.7922796104394605  
0.4980131821262799 0.7296971277878433 0.8219652363878790  
0.3310647243196733 0.6508078522651227 0.5825558661599389  
0.4614807826521969 0.6690453416378214 0.6142363644385326  
0.2405435092055328 0.5695834691163129 0.4791569003983776  
0.5512494478342971 0.6849855469905602 0.4646803887177302  
0.4919389590556458 0.7365038926944398 0.4409593728278572  
0.2530708689098246 0.5532048419140889 0.5951718905011122  
0.5881246349276879 0.6092226509857968 0.6619850292416317  
0.5479546399387887 0.5596358122600031 0.5928240916106214  
0.3164713323343993 0.7364269653220825 0.4248620392122575  
0.2468394085845706 0.7008398624748109 0.4312129482298753  
0.7115349205349313 0.4714388329375238 0.3241377452819852  
0.1935277414296828 0.3223675487753850 0.8168528598846327  
0.2133116655406678 0.8308225373577743 0.3973691857518917  
0.6953850520702889 0.9667167845457492 0.8918084440933315  
0.6941302722621493 0.3288318133876972 0.8948866458517410  
0.2103019909854706 0.4792028866272177 0.4003261519713138

0.1978749591194373 0.9761979649917575 0.8169756924202457  
0.7088879581939385 0.8216173995846529 0.3061277870391285  
0.5984231525482226 0.4662255415125720 0.4230366693706068  
0.3063411480643872 0.3302004841991116 0.9193883841090013  
0.0997393276356729 0.8310029060073717 0.2950141243477489  
0.8076518395026051 0.9660470591441994 0.7900611059507328  
0.8049491861740382 0.3377138686730584 0.7896103389894129  
0.1008088983553660 0.4641291729093601 0.2910274597071882  
0.3115106936554481 0.9842432807674093 0.9160335690429946  
0.6011876029905759 0.8380167441947789 0.4164505543445928  
0.6080873359269836 0.5356260775989043 0.2493766977440408  
0.2987495622198622 0.2564819774285063 0.7476220875973352  
0.1158221853309317 0.7535942784768279 0.4593152846920939  
0.7952087001968129 0.0421417041359178 0.95618147433368650  
0.8022587263236960 0.2622351260916948 0.9556571517486744  
0.0998363717585112 0.5396712571821116 0.4585138375658518  
0.2938715742985250 0.0558205987450776 0.7480923866972419  
0.5973410378816469 0.7565559341740490 0.2582801266152469  
0.6100044637398998 0.4003023336279701 0.2510025677043363  
0.2978579057853444 0.3901039822044956 0.7450630503080006  
0.1048586825863086 0.8880196444755654 0.4744120071068024  
0.8034177038943303 0.9080074135874250 0.9678913189134325  
0.7973116458832328 0.3967638277634501 0.9679223071145782  
0.1094507972601199 0.4045086410682043 0.4688779959889726  
0.3083430057306815 0.9239327691410640 0.7360577804537770  
0.6041141397575720 0.8905592698432748 0.2341384255127125  
0.5199959124950126 0.4671414563100135 0.5809742447924530  
0.3835357731059210 0.3564922343359420 0.0733876073891316  
0.0289027384709473 0.8556887966883533 0.1317886609488099  
0.8814024054762531 0.9402724225116601 0.6315148514812130  
0.8806075877906092 0.3577516219482434 0.6308270414890084  
0.0232521961731642 0.4421744681674936 0.1331719737535885  
0.3748805855067017 0.9468390070042761 0.0834694139030687  
0.5264128484939282 0.8631144064567488 0.5730581406773252  
0.5170508425898982 0.3599108492009859 0.4576764886182668  
0.3787721310239016 0.4461261387927698 0.9237357094420622  
0.0218126052956578 0.9404281287975980 0.2893394317098886  
0.8871387821529406 0.8567487673947085 0.7900838774457226  
0.8870133602578465 0.4440554913174349 0.7865590258766476  
0.0203761749691159 0.3563793191276454 0.2898961675113374  
0.3441132005233974 0.8567870401704730 0.9401230222546726  
0.5198636999554050 0.9465957083723827 0.4147905481581724  
0.4698177799926088 0.4780699545540253 0.3969244845670766  
0.4350318486173449 0.3278486825700916 0.8919423901533994  
0.9682382765604557 0.8193848890321799 0.3026543084654913  
0.9381260245354104 0.9780384458465857 0.8049429071989924  
0.9349285094202020 0.3211289517785841 0.8060994820016275  
0.9716371247672767 0.4791353395987656 0.3102184015192723  
0.4390236835561191 0.9490563613086668 0.9123046587964636  
0.4723577015585567 0.8220425279135046 0.4002602437070187  
0.4702823632211954 0.5144938619552426 0.7486314439193781  
0.4256267920093563 0.2789601296261581 0.2210474056031966  
0.9824988382412944 0.7760906934433802 0.9883367923002115  
0.9220017099058022 0.0223374357337793 0.4880779791583179  
0.9158932595503969 0.2744351214939130 0.4859033300290798  
0.9819036394311385 0.5243035269859305 0.9897646815269117  
0.4173654556992947 0.0262352641752859 0.2279344077682342  
0.4955201676297680 0.7644764751386979 0.6980165337324851  
0.3943901122010666 0.4363064549735255 0.6311827109105252  
0.5086223677205575 0.3645713418197792 0.1344827683618607  
0.9019547303795896 0.8622817688481104 0.0813922259290506  
0.0086296076505431 0.9427140556406244 0.5821686070586471  
0.0060644997764216 0.3563828402209522 0.5712171538837268  
0.8958554960504330 0.4429717436588985 0.0817642333194615  
0.5037551025029181 0.9456228974496941 0.1342255450727500  
0.4037352118529840 0.8615757305289974 0.6416110322656735  
0.4964579556096255 0.3840534061295424 0.7325190880621502  
0.4099082746202293 0.4102524803102123 0.2510136284001135  
0.9947188098263262 0.9083727813497261 0.9554663494647563  
0.9194407028361364 0.8898854645316986 0.4563076046933793  
0.9114390219733098 0.4064805098374949 0.4524073658469047  
0.9867659223571548 0.3912036845846458 0.9583617088489969  
0.4122140481723526 0.8941480886404005 0.2566316985362382  
0.5044485194123577 0.8896892808238005 0.7633648840211462  
0.2951890554440419 0.5195839110979467 0.6953113641111486  
0.5989758207176111 0.2735359592508976 0.1954732761411037  
0.8177329538818878 0.7756897876796395 0.9980010672794445  
0.0995348809777799 0.0213287087058693 0.4963392299832102  
0.0995058563848899 0.2728242645351356 0.5060221746772088  
0.8046320208859434 0.5275899086310634 0.0087395337717982  
0.5942633101869096 0.0250817898441335 0.2176981686088759  
0.3004773148643733 0.7914084107644886 0.7207122388640576  
0.2703566810363697 0.4279086872524737 0.5606985940209643  
0.6303876305649975 0.3676298109672448 0.0600122359768499  
0.7765133627204668 0.8571613704906859 0.1445331701271302  
0.1339869874633965 0.9429910681957557 0.6486095289871092  
0.1276443304570508 0.3588959471580799 0.6520636713890456  
0.7716434262174156 0.4401919264425293 0.1511469579967609  
0.6281650269709946 0.9496108416611513 0.0619187781515055  
0.2816716786602079 0.8674139356907882 0.5614603326209981  
0.3395968557311996 0.4601292209655203 0.4021761277247288  
0.5643792830453295 0.3401601901437153 0.8927451356388791

0.8386045015664266 0.8406350623823420 0.3171910739724098  
0.0683233811646328 0.9670598856221224 0.8155841830967679  
0.0645228562064076 0.3341007190119059 0.8209563157377329  
0.8413333108861477 0.4698648425957643 0.3124541687853695  
0.5667949627803717 0.9701886147643074 0.8896574592133074  
0.3411592930120000 0.8285385221403552 0.3949072845738150  
0.2577708000606164 0.3535988259575125 0.3941362713764920  
0.6387660627454033 0.4506388255949486 0.9013915113880607  
0.7571808578338446 0.9450518058249656 0.2959953244894665  
0.1421837864732189 0.8557210833070797 0.8018231012646020  
0.1394386601599441 0.4445995814548330 0.8072648052278736  
0.7734614914260887 0.3543793915855560 0.3072474475620690  
0.6287381194945102 0.8526158219407193 0.9207392136379280  
0.2786718464993490 0.9477956689010716 0.3984485081854705  
0.3907106433817246 0.5441956123174336 0.2738017961224486  
0.5083187625166289 0.2536650054540149 0.7697005697029181  
0.8968220572355513 0.7569212235798364 0.4405143738740790  
0.0044065340952918 0.0438211215036094 0.9424810989947646  
0.0011563245389933 0.2566474095509669 0.9470681478673755  
0.9016474623348909 0.5419232164330419 0.4485274947697356  
0.4831680906829832 0.0245797310563034 0.7641398543022243  
0.4042041308161051 0.7575579687620970 0.2632243498745474  
0.7063861929281174 0.2387477723764245 0.3058397897613871  
0.1889223714252644 0.5698391779350852 0.8141750558047087  
0.2060121583159300 0.0599807746926467 0.3880342353440774  
0.7029427367724829 0.7430078848391901 0.9073380752111381  
0.6941873233344070 0.5718115071341994 0.9140524968062507  
0.2100327860757859 0.2301055600540957 0.4113341044817171  
0.1954435528008900 0.7332787495136377 0.8042732647541929  
0.7068549510586800 0.0681099128720367 0.3063205429169303  
0.5925693689862616 0.2582622463427356 0.3961754981258818  
0.3194760598813725 0.5653482340472908 0.9003121866150872  
0.0910161842894402 0.0541965710041759 0.3009502331950480  
0.8119036660501843 0.7467318811303206 0.8009632782972772  
0.8015544403867707 0.5464509274360968 0.8090347691647732  
0.0984649887399289 0.2482407226829231 0.3083283985895533  
0.3089953643101812 0.7312765239492584 0.9004389851639251  
0.5969732383015757 0.0558168328053710 0.4130041226073167  
0.6074972509418414 0.1522970450503230 0.2730040028752385  
0.2919168062573953 0.6565764890199238 0.7323267005941477  
0.1106391075803944 0.1475354298785641 0.4423360291110806  
0.7977647165778147 0.6510060089218207 0.9398147615592528  
0.5329297535561247 0.2507005893951648 0.5728367778863778  
0.3708520435039501 0.5305391572346633 0.0794679945831332  
0.0234153494675824 0.0268492273879284 0.1360177352024977  
0.8820329115068174 0.7713336354380820 0.6364431570332856  
0.8729049087193540 0.5355443158522170 0.6423526459402060  
0.0285844062195913 0.2672223621383519 0.1412616041223962  
0.3714667309192264 0.7616271232715190 0.0707119733080752  
0.5234062752922343 0.0288478456239756 0.5741370691643809  
0.4607293450888705 0.2437744012584792 0.4074405526637567  
0.4502537279921005 0.5604571161632083 0.9319369333424627  
0.9590674210901017 0.0584631530890745 0.3026665784596464  
0.9436494000801291 0.7358778898595918 0.8047217305461911  
0.9307668657133447 0.5687800210131597 0.8162213021293676  
0.9667624093790901 0.2347583988385495 0.3104841756956814  
0.4371637192060534 0.7651718234080143 0.8956202205898731  
0.4654508441917560 0.0679219405056466 0.4047407505205052  
0.4913019464919111 0.1413921964232831 0.6706901854083177  
0.4131384357911745 0.6481500568640394 0.1538881064904269  
0.9970984607757926 0.1490367450749110 0.0640881484153752  
0.9082489770993338 0.6511512528075616 0.5600863139000778  
0.4087993982551406 0.2453578859769200 0.6376242102949701  
0.4940708444495864 0.5423059564933532 0.1520497859387077  
0.9027833471562438 0.0548788705206972 0.0702422132101519  
0.0015631501010322 0.7471763086353185 0.5602370778240116  
0.9979624122646915 0.5531223333876992 0.5852037765251195  
0.9045268841423055 0.2453281433653547 0.0824739613825240  
0.4985005745889494 0.7497905865766417 0.1241668415220168  
0.3974687572625447 0.0529602487304340 0.6195493523678129  
0.3111807581471872 0.1551347664272942 0.6184639914610542  
0.5799875013260398 0.6460841723414438 0.1504117212604988  
0.8100379026515605 0.1517043634894786 0.0668321124265994  
0.0913073224614076 0.6480850076499846 0.5748845365772139  
0.2967379221550139 0.2777585781562350 0.5474241452160650  
0.6043710876826315 0.5331416452963490 0.0483056190767144  
0.7875719090784762 0.0340991169618257 0.1561584170482437  
0.1130900862020710 0.7692298046917364 0.6570604272854342  
0.1175053367938689 0.5272221185841308 0.6556206040621710  
0.7850737568373082 0.2703533082102726 0.1528182111555856  
0.6236985673655084 0.7596637323183451 0.0633422024285608  
0.2773367665113171 0.0344900343726231 0.5509066602448346  
0.3338729971765228 0.2467624135359388 0.3586362406096447  
0.5714617140355992 0.5626808346290205 0.8549007016544964  
0.8321890855668905 0.0505702101916116 0.3461661292019974  
0.0705235758932126 0.7473605296330923 0.8459208028398474  
0.0595411267859848 0.5498052574652393 0.8315974692313537  
0.8358734623912425 0.2380709092351863 0.3328067803274454  
0.5745241026596150 0.7320550749898703 0.8793202003441702  
0.3357701760146846 0.0672122188868727 0.3754902860011511  
0.4115103043679629 0.1540854998856120 0.2774865045102772  
0.4801887589978955 0.6458687608346384 0.7787447774312382

0.9060084168396609 0.1471839393392087 0.4297729518015757  
0.0005270956655315 0.6499722381189128 0.9324129897198291  
0.4057732356170056 0.5949374151539367 0.5874894453620040  
0.3874344374095707 0.7251399438713980 0.5853086544195796  
0.5038975859191970 0.6931738209114241 0.4732474570023349  
0.2466235213806116 0.5907132750108401 0.5453887273599864  
0.5591740167680872 0.6078466202877213 0.6029429588112129  
0.2942451799503952 0.6935629076958133 0.4418327214020528  
0.2350734085479499 0.6123228210958037 0.2226945403005022  
0.1919794851858511 0.6423554607436576 0.2713951735137607  
0.6316518753343917 0.4687028208250185 0.3104606921520345  
0.2737043145768896 0.3242167448227365 0.8069875630187309  
0.1329253774623924 0.8263129139383663 0.4069251456819474  
0.7750196569370463 0.9709441525088367 0.9025115273329599  
0.7744324044818031 0.3311070605669421 0.9031652017619516  
0.1293219432591868 0.4717096637367407 0.4056724565466401  
0.2774872602738426 0.9843152000187192 0.8044009699250549  
0.6287254654574188 0.8269060775747712 0.3013723383437269  
0.5262427068564565 0.4411114314380414 0.4637955554439625  
0.3759539757408216 0.3663508080143115 0.9525523579245967  
0.0294972910260526 0.8618244349097942 0.2538527792803469  
0.8785212366354749 0.9350056880984151 0.7535197602664104  
0.8770657627444629 0.3654737427239298 0.7523899986931945  
0.0288116662703298 0.4349499327978172 0.2545137517252629  
0.3676390389243570 0.9336644866826566 0.9627422581027775  
0.5303268084179223 0.8692237735032384 0.4525366240590939  
0.4684216793322503 0.4503090583210110 0.6744222550860044  
0.4320621338483742 0.3531318615559958 0.1702108285072762  
0.9769680577392611 0.8507571601817873 0.0379983968872492  
0.9331113363594857 0.9486130984034535 0.5386282637064860  
0.9293004190326124 0.3485905544340632 0.5343283209178492  
0.9716831790571895 0.4502790020606625 0.0395396488432771  
0.4278135421474798 0.9534238252393199 0.1747911927556467  
0.4804095401456356 0.8429558127691964 0.6694431601936172  
0.3157601314747734 0.4449496485569983 0.6593899630430526  
0.5864833603111866 0.3512893214261809 0.1594670309176013  
0.8250607340401789 0.8503960284025682 0.0475855353663817  
0.0863854191160099 0.9491349654989525 0.5506643152711790  
0.0851925022067813 0.3482160557663357 0.5499888474038511  
0.8178638698433823 0.4519815357336340 0.0522814951551465  
0.5822688581113642 0.9529202619791388 0.1620467664267203  
0.3247898378035290 0.8594538464651699 0.6650051503311317  
0.2700538101501784 0.4290264677292967 0.4387515474555050  
0.6316265482537193 0.3722256376759166 0.9373238547071797  
0.7710312955083918 0.8666423088897641 0.2658203010036928  
0.1354661971242498 0.9348191266239514 0.7708856228534945  
0.1312298722431973 0.3661979210027426 0.7743400819458669  
0.7747264823656806 0.4333427705181798 0.2734556215845228  
0.6296113165031103 0.9331425778032616 0.9413442727249136  
0.2781992152382944 0.8707258985087449 0.4397215766386904  
0.4027840716477628 0.4723861770573285 0.3301739226599388  
0.5006387417047967 0.3276442486880733 0.8217367247632035  
0.9058350503037281 0.8276191481259005 0.3795451581414189  
0.0012206090186964 0.9730389681973879 0.8806029277505713  
0.9969072470036383 0.3269275259090134 0.8840071111665854  
0.9067412004664746 0.4733456837555759 0.3821413652143980  
0.4977912472905734 0.9576408550087326 0.8309579543187784  
0.4076663402906493 0.8275824382851605 0.3256981925658090  
0.6266458056215727 0.2310634916120504 0.2924370185848399  
0.1272314604176443 0.0705657755557264 0.4078365629265592  
0.7814949006731347 0.7294115738706548 0.9123386671183328  
0.7745454299891597 0.5738769499844497 0.9179756243621096  
0.1297435522592919 0.2254821526553067 0.4168909806474411  
0.2751618188826263 0.7288168914057840 0.7891401975721878  
0.6268871693188741 0.0749465527514485 0.3017773085724064  
0.5259440888939974 0.2781948754795332 0.4578484635472384  
0.3773368046684971 0.5259772524746805 0.9565108888449220  
0.0237682307762214 0.0198252599325716 0.2578990373959410  
0.8811437433599844 0.7775576339187187 0.7586038991713755  
0.8732215744223999 0.5235655477128979 0.7636905536416917  
0.0287661177516046 0.2765806233654658 0.2630022269630347  
0.3676206835399221 0.7779132934058862 0.9497103152768624  
0.5266476471913505 0.0251668850657682 0.4518816421268153  
0.4847222535107039 0.2224579594143206 0.6622263547962131  
0.4173234172329491 0.5671719121950545 0.1630867325952886  
0.9812204815168005 0.0694807013401438 0.0529695684367887  
0.9228004268508229 0.7308337342818271 0.5496703824047119  
0.9210119308684706 0.5707008516524286 0.5590442543279617  
0.9821977648430048 0.2291113981679775 0.0583864434542839  
0.4222247591628120 0.7287796746247411 0.1510634576927339  
0.4737030895490683 0.0623312861770653 0.6574279463023281  
0.3290320389842218 0.2337394895010656 0.6390611139021488  
0.5713214579995817 0.5649169398744702 0.1492913698853586  
0.8241318775448409 0.0711962223554465 0.0620618789080460  
0.0798626642228457 0.7285795292938292 0.5636007591697878  
0.0768274572501628 0.5674562105107473 0.5692858621200491  
0.8258691059296382 0.2319189239014928 0.0638633242180921  
0.5749175586116736 0.7275657671165163 0.1475434737605430  
0.3203904482859490 0.0747854908189798 0.6357147855253541  
0.2752030443971479 0.2764215226359941 0.4287722412624078  
0.6262959024870959 0.5295863101376364 0.9305268938408544  
0.7719040109941002 0.0246395859873615 0.2756556386286878

0.1299294936481499 0.7763049527525145 0.7770257076974386  
0.1280026641021802 0.5243147383073724 0.7791133771399855  
0.7754069254645002 0.2753090893992067 0.2747448498695881  
0.6305649405459454 0.7713140630503706 0.9408220126058342  
0.2748023577880858 0.0277513913061119 0.4284121766810439  
0.4078158140474544 0.2316468088805055 0.3166323707667372  
0.4925640622471461 0.5716019615136929 0.8289232651510587  
0.9044772831775338 0.0692718332917604 0.3916018743352674  
-0.0007311109465995 0.7275898269005849 0.8930562748158096  
0.9941494109792341 0.5725473647790158 0.8923635845038302  
0.9059185664556472 0.2247268279118165 0.3897508459089293  
0.4071931812296789 0.0778034362874639 0.3211987199274950

Structure TS reaction 37v→O2/1 S=10/2

1.0000000000000000  
20.1473052208878016 0.0000000000000000 0.0000000000000000  
0.0000000000000000 19.7681594983396991 0.0000000000000000  
0.0000000000000000 0.0000000000000000 13.2309279702280005

Al Fe H O Si

2 2 8 200 94

Selective dynamics

Direct

0.2747371418961464 0.5760849912797568 0.7839893543764376 F F F  
0.4976417854889519 0.7305206861399967 0.8228296749751252 F F F  
0.3338892316107201 0.6546691329631282 0.5716953612630937 T T T  
0.4652251280149518 0.6686156922695223 0.6210639400640415 T T T  
0.2527625170679413 0.5898290112166441 0.4334038503615956 T T T  
0.5504089180967571 0.6856744454711713 0.4640991328636536 T T T  
0.4900827249600256 0.7370487597577234 0.4451597563551332 T T T  
0.2704502363671454 0.5511538560055159 0.5646402992836568 T T T  
0.5877446434275752 0.6065511173008482 0.6617838361929150 T T T  
0.5467338557976864 0.5572907341163004 0.5928314438103247 T T T  
0.3134885857643169 0.7491102041821686 0.4536295745138678 T T T  
0.2551295604929128 0.6932757053815480 0.417108902222648 T T T  
0.7100608935196604 0.4705816316873026 0.3227982121271751 F F F  
0.1936403206237927 0.3225394214340156 0.8157402777594243 F F F  
0.2117917136627696 0.8345375849715992 0.3953400010821326 F F F  
0.6950623495026491 0.9680328144835713 0.8915608853173183 F F F  
0.6940915543297947 0.3286758298938324 0.8947397538116419 F F F  
0.2080928831383417 0.4726447708406170 0.3995784079498748 F F F  
0.1983807592678133 0.9755559118658397 0.8157203047397275 F F F  
0.7082880173425963 0.8216892854952462 0.3058473484716728 F F F  
0.5972189313000911 0.4674750221798121 0.4216998541996588 F F F  
0.3060504532344339 0.3307337400212731 0.918941487772535 F F F  
0.098968814793485 0.8317026979468167 0.2934561995025504 F F F  
0.8076536165549797 0.9659497156393968 0.7901640399971015 F F F  
0.8049462631515567 0.3370058278577588 0.7899936199723641 F F F  
0.0991674761395345 0.4634971801418786 0.2902848124877266 F F F  
0.3113768190426001 0.9840638525477701 0.9167267487327138 F F F  
0.6002231434829710 0.8374812458755088 0.4155413884579602 F F F  
0.6072905432820050 0.5362718099330621 0.2479237833581678 F F F  
0.2988111571038630 0.2557615450140460 0.7486661713979288 F F F  
0.1136448312447129 0.7555052705619971 0.4583700127859913 F F F  
0.7956888228174250 0.0416414383768142 0.9566241027838132 F F F  
0.8018055732203351 0.2615351764567535 0.9557967232279339 F F F  
0.0995732934845250 0.5390658779534263 0.4572988193168115 F F F  
0.2944706700333555 0.0557657555141731 0.7486342198565410 F F F  
0.5967278603251387 0.7567516950478179 0.2570878734859434 F F F  
0.6071085599819170 0.4008881529250914 0.2503147921242928 F F F  
0.2989546161595200 0.3893826675634671 0.7437476958172198 F F F  
0.1031676395320957 0.8893836660809384 0.4724293786363418 F F F  
0.8016450963485511 0.9070852550204833 0.9674035651510948 F F F  
0.7971903679704226 0.3961103877052921 0.9684578929546177 F F F  
0.1047311561007049 0.4041766472460182 0.4683955075249600 F F F  
0.3104204419025507 0.9243945582470232 0.7367072170961393 F F F  
0.6036714078663721 0.8908470724201294 0.2336908055950957 F F F  
0.5206797902697247 0.4678398436389912 0.5809388503394288 F F F  
0.3829732742185215 0.3574506546002070 0.0725746184525065 F F F  
0.0282207093701317 0.8557045283502589 0.1306668157253128 F F F  
0.8807933507761945 0.9401717186521736 0.6311193484731774 F F F  
0.8790588633667511 0.3575362072935491 0.6302931112505306 F F F  
0.0229803112299223 0.4411612152009425 0.1316843493415831 F F F  
0.3742503621313276 0.9458344101195664 0.0842770762688261 F F F  
0.5268330508068217 0.8618065427908448 0.5733889049891943 F F F  
0.5173219831585314 0.3601947624911475 0.4584743824288182 F F F  
0.3784356922993481 0.4468827408677427 0.9225463839701931 F F F  
0.0199721203090490 0.9403063369353006 0.2880956195622701 F F F  
0.8870333104727308 0.8566972247288192 0.7900365204975301 F F F  
0.8868309470118874 0.4432454236387358 0.7870605557445458 F F F  
0.0186622245250732 0.3559130302602682 0.2887170370248668 F F F  
0.3438553260637960 0.8564623483204201 0.9396224902717591 F F F  
0.5187076201024610 0.9459568418729134 0.4156589854695838 F F F  
0.4679508170306832 0.4783536506460351 0.3991765160602512 F F F  
0.4347715073676639 0.3286584246664930 0.8913223918049056 F F F  
0.9673947673976997 0.8191099627595619 0.3013671086319150 F F F  
0.9383157008512981 0.9779349613410560 0.8040347792655140 F F F  
0.932557597336570 0.3203635378268501 0.8042777352533648 F F F  
0.9697026953766965 0.4785614430105554 0.3071925048844193 F F F  
0.4389736977621652 0.9489376382168757 0.9138828185778536 F F F  
0.4710131133551556 0.8210648411442563 0.4018639040587217 F F F  
0.4691821721266720 0.5159615584529647 0.7452568087433349 F F F  
0.4230249108802724 0.2789940306120542 0.2203732571970320 F F F

0.9820631118423009 0.7758128700322757 0.9873873929972277 F F F  
0.9221103278894205 0.0218494968041867 0.4873653952989514 F F F  
0.9154062325682233 0.2742348269712664 0.4855210004383466 F F F  
0.9823369518552667 0.5240630237575559 0.9886991035855672 F F F  
0.4158286780144351 0.0258476023043528 0.2287650407303801 F F F  
0.4920732437574102 0.7634481707028158 0.6969277317616402 F F F  
0.3957453278635228 0.4345539743242668 0.6292262087886158 F F F  
0.5083738405260334 0.3615745192535442 0.1313480914942744 F F F  
0.9015635287221713 0.8626364048953974 0.0796253599214936 F F F  
0.0081616417096342 0.9428475526581153 0.5834449753048716 F F F  
0.0048727420375556 0.3544802313900703 0.5747865299087636 F F F  
0.8956072960314501 0.4437259531992908 0.0813870496104414 F F F  
0.5030148036734232 0.9460351599517907 0.1347468047434361 F F F  
0.4028049043405346 0.8605659069582714 0.6358939812602529 F F F  
0.4982014714682350 0.3853235856748540 0.7342757840702134 F F F  
0.4126597755107753 0.4106793816992820 0.2494667011424454 F F F  
0.9948556601225391 0.9079476203933083 0.9540457764264119 F F F  
0.9198343158409656 0.8893440305904861 0.4564767459782431 F F F  
0.9124374849181933 0.4063783133622820 0.4527911109907024 F F F  
0.9851816217572917 0.3909699967480407 0.9571534112092195 F F F  
0.4123562323421908 0.8939799179586529 0.2577411927375692 F F F  
0.5015019254229998 0.8882297610634637 0.7636442364707747 F F F  
0.2980641015459042 0.5190695829059706 0.6899342373814576 F F F  
0.6000758802591690 0.2734659660684713 0.1956910883938292 F F F  
0.8171111876377495 0.7751630647335048 0.9990063121630399 F F F  
0.0989340284909446 0.0221557892868063 0.4983586148449035 F F F  
0.0990468651251035 0.2725138337536990 0.5066443671720435 F F F  
0.8031864628116878 0.5270420343633901 0.0085110435849529 F F F  
0.5941310815317777 0.0253387179965472 0.2167913384610856 F F F  
0.3011448717496990 0.7919589303364631 0.7171817403923839 F F F  
0.2717703309376347 0.4253228316864721 0.5587453890441552 F F F  
0.6308564542529922 0.3679873909354967 0.0603106599827896 F F F  
0.7766441739703112 0.8572760163415296 0.1451168029339840 F F F  
0.1339694070708575 0.9420582602973582 0.6480600026248666 F F F  
0.1273858549594209 0.3591239306259411 0.6515698741993177 F F F  
0.7717765544334583 0.4397949879672751 0.1515884702852546 F F F  
0.6268622982465715 0.9495584746937098 0.0607018705330731 F F F  
0.2801659330462982 0.8708629145918323 0.5606191483089802 F F F  
0.3382267238205827 0.4583544674591948 0.3980455021989400 F F F  
0.5643629345846222 0.3390862929522314 0.8941013834998515 F F F  
0.8379468347134278 0.8401892050025737 0.3185748682125222 F F F  
0.0687460517034495 0.9670982175962379 0.8151839549148505 F F F  
0.0647944099240831 0.3351208212108716 0.8213667010916481 F F F  
0.8396609201767760 0.4696016311172002 0.3153541591091908 F F F  
0.5665865337236724 0.9692358345199139 0.8869211049950749 F F F  
0.3401213004513508 0.8297033979248312 0.3960839319774507 F F F  
0.2589519488992380 0.3504514401993291 0.3924320842530875 F F F  
0.6379132028533974 0.4502317934159379 0.9006618936544228 F F F  
0.7570108882995470 0.9449711228344171 0.2965657745027741 F F F  
0.1425344894810578 0.8553830457747154 0.8019637896757388 F F F  
0.1406968773289208 0.4451149073391889 0.8062418710430137 F F F  
0.7728002460230385 0.3537436883557845 0.3073005990592677 F F F  
0.6297385704262624 0.8529314198174731 0.9189988452208695 F F F  
0.2796207124747809 0.9496847762269027 0.3962508147140724 F F F  
0.3909216118196923 0.5437930499428774 0.2724494974574299 F F F  
0.5081272461100212 0.2541546120159452 0.7691428801868554 F F F  
0.8971488534405339 0.7565430303683698 0.4405370955310843 F F F  
0.0043775783811313 0.0434541397988468 0.9420601243071758 F F F  
0.0012438918629556 0.2567531311833235 0.9464663833271416 F F F  
0.9025230346858280 0.5417246355780208 0.4481775890474040 F F F  
0.4819696695001028 0.0234642336720370 0.7633489157333102 F F F  
0.4026444322813845 0.7578098575621652 0.2632232197777924 F F F  
0.7067702094148984 0.2377016822155085 0.3064536011549706 F F F  
0.1905745474556753 0.5704876601170739 0.8090241167049044 F F F  
0.2052425792789450 0.0609221125109087 0.3893259194597718 F F F  
0.7028673109711079 0.7423932481196047 0.9073460224314331 F F F  
0.6940476886540310 0.5713736100165647 0.9110796321604582 F F F  
0.2094499325680914 0.2281133844825263 0.4127680435535268 F F F  
0.1960084500309733 0.7330576355000318 0.8002958813296317 F F F  
0.7065219701693906 0.0678817687116364 0.3062689019547378 F F F  
0.5929863284683492 0.2587741898540017 0.3963964897963947 F F F  
0.3199536857803054 0.5663435469973805 0.8941663385919298 F F F  
0.0906086398188961 0.0529998368655811 0.3019710229232047 F F F  
0.8122652087238436 0.7465896482857062 0.8015704569045070 F F F  
0.8025705097617930 0.5465122011949504 0.8085516448944432 F F F  
0.0986635453838502 0.2491346736058304 0.3084965905860031 F F F  
0.3094774295213938 0.7309957843785284 0.8957721400288960 F F F  
0.5965230748346713 0.0547820490904698 0.4124523149615911 F F F  
0.6070890746713147 0.1522470289877091 0.2739814343636766 F F F  
0.2931876584083142 0.6574561534667822 0.7251318345105844 F F F  
0.1085891752564550 0.1476220584585093 0.4416987826927752 F F F  
0.7973700553228440 0.6505575171664972 0.9398874782873676 F F F  
0.5323620757357688 0.2502496600241670 0.5722813242576095 F F F  
0.3697820965660981 0.5321449571586143 0.0768420492201116 F F F  
0.0240705823456722 0.0274019915806818 0.1357647203985692 F F F  
0.8818210301940539 0.7715471376481631 0.6362808119638430 F F F  
0.8738735710780787 0.5337864502174128 0.6417436038153284 F F F  
0.0287935631178868 0.2664560458711165 0.1409715248789780 F F F  
0.3698498335177547 0.7606422312142698 0.0697864075799330 F F F  
0.5233685485531794 0.0287138200126549 0.5742039807345236 F F F  
0.4611644110032316 0.2445744582362011 0.4057107370152622 F F F  
0.4499267346939604 0.5609907997492130 0.9303386390701007 F F F

0.9585755558941003 0.0588058186783442 0.3017691082393910 F F F  
0.9441543600389508 0.7359065061077459 0.8037608054947540 F F F  
0.9321168012670711 0.5678239930930360 0.8146951088676886 F F F  
0.9671769501896534 0.2337295128471766 0.3105963703612389 F F F  
0.4372718510161278 0.7649489885901701 0.8972291178556446 F F F  
0.4649340233247301 0.0674388073859191 0.4050305879621519 F F F  
0.4911157201617158 0.1411413983222332 0.6716331305564864 F F F  
0.4129350096791669 0.6483316165180071 0.1547666072328795 F F F  
0.9964067871978344 0.1489541055535568 0.0626464038333268 F F F  
0.9044612766849767 0.6507157443132101 0.5603413720843307 F F F  
0.4085070693436279 0.2449517622381094 0.6377862262681901 F F F  
0.4935034557262767 0.5426538033563730 0.1492159963612210 F F F  
0.9030744410065523 0.0539144439956871 0.0707222381845369 F F F  
0.0010453858404560 0.7432333135322793 0.5615883310151162 F F F  
0.9983686227370967 0.5566372027504656 0.5847701745235270 F F F  
0.9045500904700532 0.2457797654290985 0.0820363389324754 F F F  
0.4971453703928717 0.7504300392529615 0.1242878519640129 F F F  
0.3973579036515318 0.0527823217398833 0.6184856110198993 F F F  
0.3110511494857633 0.1547083205013919 0.6188879061417225 F F F  
0.5792533061151346 0.6466341198643732 0.1485169755453697 F F F  
0.8107760517256395 0.1512680777019284 0.0671134061644523 F F F  
0.0950554049150085 0.6481812560469393 0.5733726247368551 F F F  
0.2960961418722476 0.2767957258717857 0.5482955951438413 F F F  
0.6044281070335913 0.5338586183601350 0.0467935568088720 F F F  
0.7875623217983261 0.0338670269568908 0.1564711187883816 F F F  
0.1117754115049223 0.7700346015910142 0.6564879934780379 F F F  
0.1171464479059523 0.5267594584248698 0.6539858730344861 F F F  
0.7848719937433088 0.2698145387872088 0.1528070280602662 F F F  
0.6220475279347397 0.7604930894132238 0.0618198319593972 F F F  
0.2770113298766432 0.0343086373640489 0.5511801296959931 F F F  
0.3338713175193178 0.2429022235382874 0.3608090620725477 F F F  
0.5712051973477017 0.5622692826056337 0.8530600106777584 F F F  
0.8318442712337344 0.0506942695120145 0.3466059560285615 F F F  
0.0712449809263234 0.7469646114728690 0.8461983293146602 F F F  
0.0613046005701179 0.5502560076344594 0.8318242957838677 F F F  
0.8362429440000412 0.2376267351380932 0.3321774691168713 F F F  
0.5749788314694513 0.7330317499074468 0.8763316354181043 F F F  
0.3352105658022353 0.0696370692288966 0.3763107764902571 F F F  
0.4130821673151814 0.1537833237826973 0.2763228972754703 F F F  
0.4805628061856382 0.6462517825046774 0.7773582150302545 F F F  
0.9059837548727216 0.1468889852093866 0.4302992362479756 F F F  
0.0004543554233791 0.6497207085071963 0.9315141950899246 F F F  
0.4026694736407431 0.5989686529123973 0.5896652325790759 T T T  
0.3887441955371670 0.7234083716587189 0.5847535453719988 T T T  
0.5038527255022417 0.6945146508965886 0.4787730138905991 T T T  
0.2710620643384161 0.5919188700776755 0.5215280805067667 T T T  
0.5575500443402266 0.6057375537626886 0.6040859226059326 T T T  
0.2845438745167863 0.7131275307116819 0.4802806138283705 T T T  
0.2338047401121455 0.5983524697788697 0.3464729977610573 T T T  
0.2260778212169154 0.6645920703966286 0.3341539117051466 T T T  
0.6303157540904820 0.4690404717438668 0.3089679396667364 F F F  
0.2737417978095635 0.3241969569738572 0.8063561093132350 F F F  
0.1317665145594091 0.8273993030029914 0.4056538250486383 F F F  
0.7748499563744247 0.9708967055504800 0.9024148353444517 F F F  
0.7744204308321159 0.3305768641475879 0.9034078693147762 F F F  
0.1277475180083272 0.4703513272829056 0.4049508982108634 F F F  
0.2778868775492427 0.9842872708740344 0.8046743473239601 F F F  
0.6282200583866313 0.8269940293295974 0.3005038322333604 F F F  
0.5256802043747228 0.4414427200406266 0.4634187284123286 F F F  
0.3754890057431410 0.3671427086712313 0.9517032337397637 F F F  
0.0285957672812742 0.8617823612407847 0.2526927396943890 F F F  
0.8784881611310880 0.9348966284711082 0.7531835540845293 F F F  
0.8768774049990071 0.3648310159274430 0.7520082149149374 F F F  
0.0276411318537342 0.4344308269935340 0.2532066979223444 F F F  
0.3672619808648676 0.9332259249182115 0.9634017886917050 F F F  
0.5295963899448921 0.8685642288168367 0.4524752640475356 F F F  
0.4688965004393353 0.4499016777639042 0.6739826538311675 F F F  
0.4318482308323297 0.3526004450322091 0.1687175284848337 F F F  
0.9766492503280162 0.8505503727139327 0.0366862061556006 F F F  
0.9329458016703995 0.9483093470690207 0.5386302383560420 F F F  
0.9287282632603109 0.3481085006952469 0.5348716311033570 F F F  
0.9714064875154165 0.4501963399385076 0.0385445932146382 F F F  
0.4270857813813365 0.9532547936003368 0.1755697738675792 F F F  
0.4787925914203299 0.8428581676593794 0.6678368529350465 F F F  
0.3166620831209599 0.4437879905690210 0.6571266764961834 F F F  
0.5861907525536481 0.3507219943721580 0.1587005487597111 F F F  
0.8245607630544498 0.8501954899860991 0.0474892864019480 F F F  
0.0857806993416688 0.9493265986194501 0.5508473345636844 F F F  
0.0838168907169674 0.3477381486682347 0.5506913814200161 F F F  
0.8175782196101409 0.4517223876496885 0.0523571096552899 F F F  
0.5816609041648775 0.9531631792882820 0.1615085175120683 F F F  
0.3239049995939283 0.8607969724983064 0.6628296916510834 F F F  
0.2695050079071066 0.4261466021783136 0.4368550524655177 F F F  
0.6316383437295414 0.3718577338904367 0.9375012258686723 F F F  
0.7708895487541767 0.8665628881996241 0.2663676514339102 F F F  
0.1355939261573766 0.9343001220308196 0.7703215970661290 F F F  
0.1314335586686255 0.3668001300042434 0.7737153349385935 F F F  
0.7740295618867279 0.4327880670918418 0.2738588364115486 F F F  
0.6295533695793054 0.9334304661578656 0.9401317919631325 F F F  
0.2767301347511477 0.8729493806303097 0.4385704841700786 F F F  
0.4022585389296225 0.4719177654663582 0.3290461247099259 F F F  
0.5008086793503352 0.3277821259882217 0.8222761450987548 F F F

0.9058010199264999 0.8272136644098964 0.3796239971786548 F F F  
0.0014190930079963 0.9728488343443473 0.8797575262846706 F F F  
0.9967795846298131 0.3269013284360014 0.8830582817526675 F F F  
0.9064436524425403 0.4729762052882833 0.3821423642712460 F F F  
0.4967099107352908 0.9569611009102701 0.8307922822841789 F F F  
0.4064452206276599 0.8274938076909351 0.3264624730433923 F F F  
0.6270220482012689 0.2308887793189456 0.2929687999656707 F F F  
0.1262554610101319 0.0706856763424852 0.4087577305963990 F F F  
0.7815728424892754 0.7290509150857361 0.9125919406121312 F F F  
0.7745103223282186 0.5734573576070758 0.9170132536161688 F F F  
0.1290315359622909 0.2253502036904038 0.4172113462146640 F F F  
0.2755782226621051 0.7285327219920319 0.7840751531484784 F F F  
0.6266112166819298 0.0747535767584395 0.3016108852843686 F F F  
0.5260587075313197 0.2784036731991932 0.4575270108751397 F F F  
0.3761861985424204 0.5270108025357416 0.9538371972062336 F F F  
0.0232500921723897 0.0197242732366973 0.2575867765079991 F F F  
0.8813817150788594 0.7774802567187322 0.7584476516270939 F F F  
0.8740897756383035 0.5228011278399478 0.7632348959894699 F F F  
0.0286093648859591 0.2763169461287660 0.2626929476550046 F F F  
0.3666435440571760 0.7773805815340751 0.9488302600593386 F F F  
0.5261362578494868 0.0247316239243034 0.4518998207529279 F F F  
0.4844146665601130 0.2222557934100209 0.6621602991564544 F F F  
0.4166029949016519 0.5672531968510910 0.1615018327184927 F F F  
0.9813534375464883 0.0692426720992287 0.0525447567309172 F F F  
0.9220348764336634 0.7298308487364125 0.5499623004376630 F F F  
0.9208928648578549 0.5709095786122944 0.5587544658904235 F F F  
0.9821768489048068 0.2291387435182202 0.0577112723660633 F F F  
0.4208315753417224 0.7289776095331391 0.1509220946129659 F F F  
0.4733495975899373 0.0621690854791623 0.6571565644075221 F F F  
0.3287057085527252 0.2332344750550917 0.6398223157740617 F F F  
0.5707185634274836 0.5654077211369497 0.1475015391076582 F F F  
0.8245660693797632 0.0707180828133431 0.0625060300151503 F F F  
0.0801728184172106 0.7282481300316306 0.5626957565462760 F F F  
0.0776194798414949 0.5680502554877620 0.5675589362751552 F F F  
0.8259973763982842 0.2316062456286119 0.0639471514740535 F F F  
0.5737196481278062 0.7281204351280763 0.1464170381269909 F F F  
0.3202880152900107 0.0744682851510206 0.6357738696475792 F F F  
0.2750644792905206 0.2738922870984055 0.4294738136333791 F F F  
0.6262951043747123 0.5293509615181407 0.9291368904104615 F F F  
0.7717858715952275 0.0245519449800469 0.2759647653749369 F F F  
0.1299795309728680 0.7760797084246605 0.7759093106172941 F F F  
0.1291397429867800 0.5247350693349162 0.7770670836456759 F F F  
0.7755210036868405 0.2746946447606646 0.2747983859344743 F F F  
0.6307894249484463 0.7717530624210696 0.9396304776512139 F F F  
0.2744518068402613 0.0291335538721640 0.4284099310419904 F F F  
0.4076012149306649 0.2310958534294656 0.3162133156144336 F F F  
0.4923700036837815 0.5711424544149111 0.8278922258272559 F F F  
0.9044110201431792 0.0691606339568480 0.3914284265599832 F F F  
0.9996407258169171 0.7273276981284553 0.8923658891192261 F F F  
0.9952437155406244 0.5722300657171075 0.8914249435253367 F F F  
0.9061565719506888 0.2242793594043491 0.3896327489394977 F F F  
0.4067390403189393 0.0780715729592103 0.3214962037389881 F F F
